# Supplementary material for: Genomics of Yoonia sp. Isolates (Family Roseobacteraceae) from Lake Zhangnai on the Tibetan Plateau
Source: MDPI journal article supplement (doi:10.3390/microorganisms11112817), 2023-11-20

Figure S1. Phylogenomic tree constructed using RAxML. Nodes with bootstrap support exceeding 80% are indicated by solid circles.

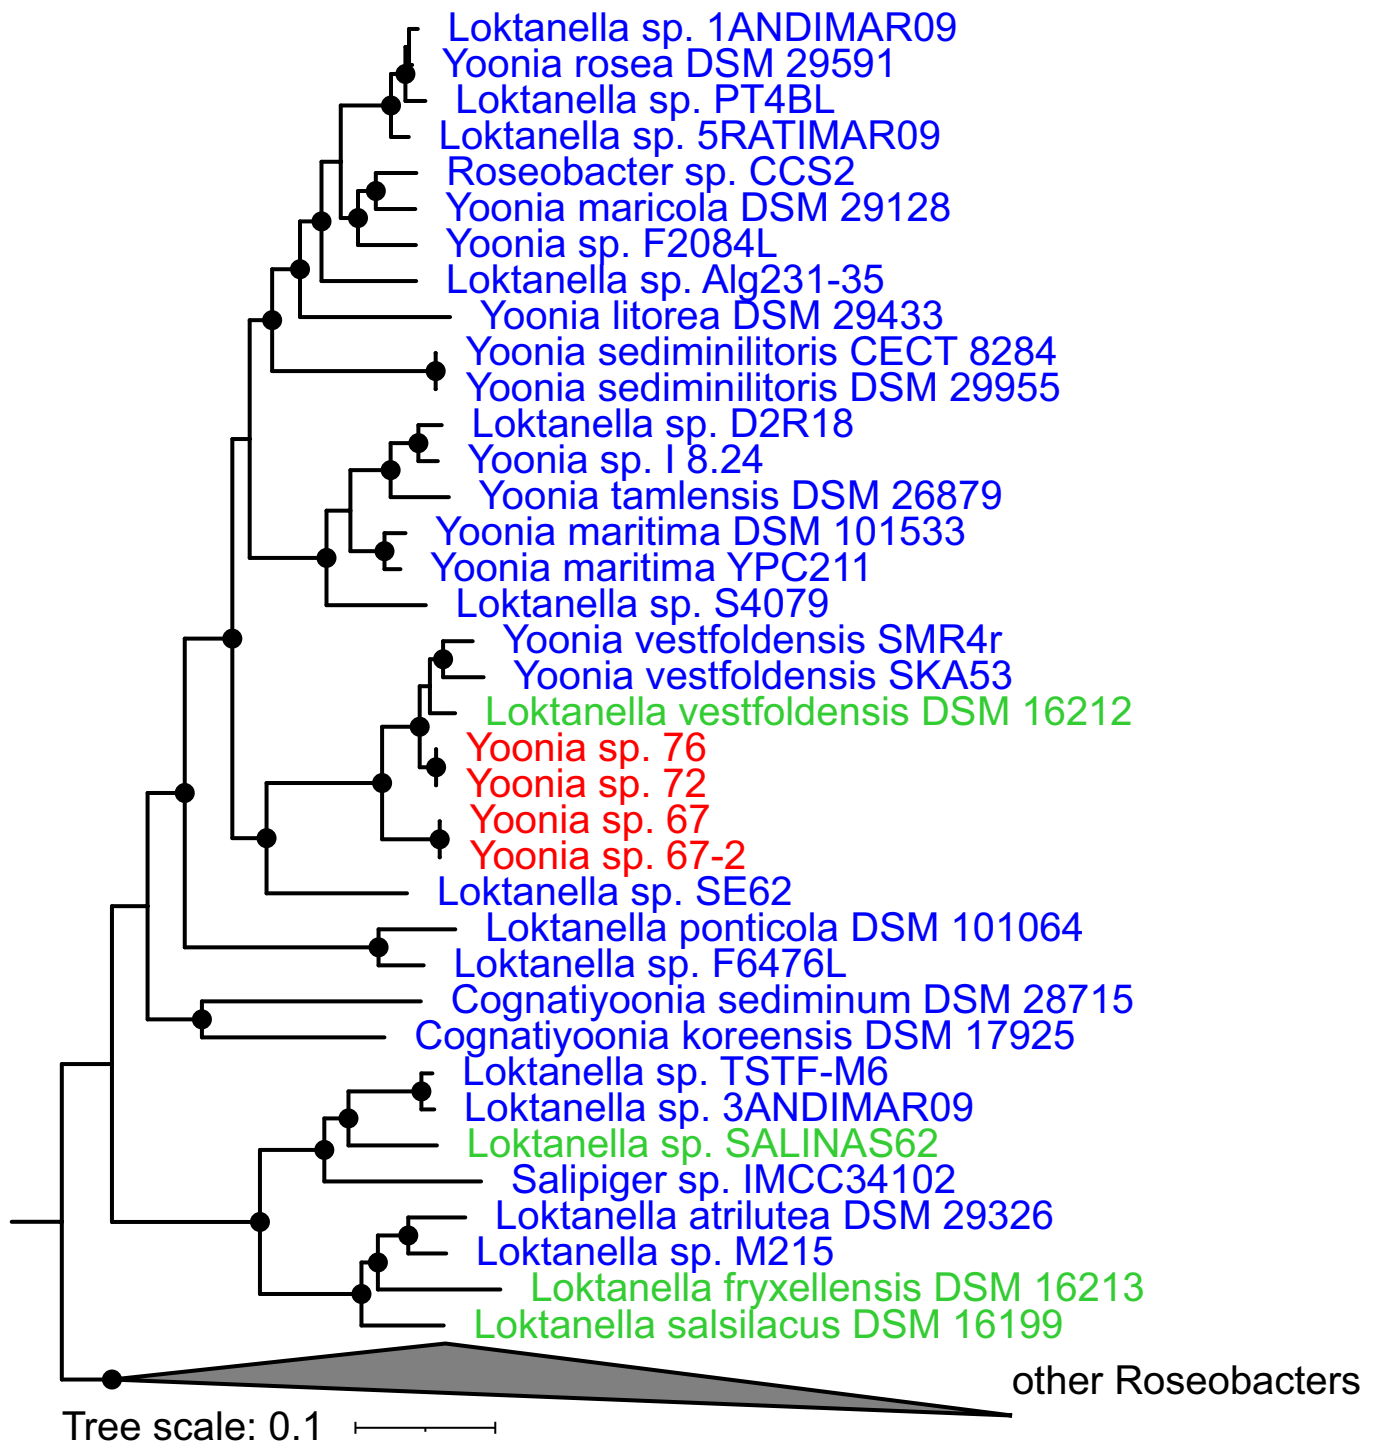

Supplement: s1 [file s1]
