# Supplementary material for: Genomics of Yoonia sp. Isolates (Family Roseobacteraceae) from Lake Zhangnai on the Tibetan Plateau
Source: MDPI journal article supplement (doi:10.3390/microorganisms11112817), 2023-11-20
Supplement: s1 [file s1]

>GCA\_000011965

AVIKPVVQDAYAPVLLIRQQQVATVTGAGSPSLRAKTVYRKSGLQRTSTKWVAKPLY-  
GVLKMGKIVQLVSISVDNRSVCTVAQVVEQEVVHGLVALEAVKRKIALEAMDGMTTEDPAKVAEFE  
EELDLKKFRDAEARADMLPVMGLTLGLRFDPEHPVVHDLVPVPIYEVI-  
GIMADKGGIEVDDCAISNAVSDVDPIAYVSPIDLA AVAGEQMAFIDQEAAVAAAREAI ALEELALEAGI  
LVVGIDPLLLPV-FGADADV-MSFANRSRELASIVALAVAAEELSRA-IDS--ASDM-  
MLRAQAAALAEKRGTAEQIRIVKRMQRSAGLADDPVELLLEDAAEGNSSWAGQIYDDPISGSSES  
AGNIVHAANARQNFARSITFLRKVEISDKAAAPLMRGVKHNSKSRSSRKLDDAITALNFPNVPPGIAIR  
AAAGKPADTLLHDATEGERILLIVRWHVTWKTAVIVALLSAAGDIVGLVALGGIAAVGKPDGLLNRH  
HKLNGSLIEQRPIVEKLT LRLRAALKEKLAKDQIIIFVVKVQGD LVADAKVQMG-  
GPVGAVVAIQGELIFVRRHRQT VITDQEATV-ILKGVAEGPADAQALLRIRVTH TIVELSVLLIPE-  
PVLVDSVTIREGVGKALQIIQLDVYLLRDMGTGAETLAKSASREVIREVLAVDPITGVRLAYGRVKERM  
GKKLGLKDLE-----  
ISILPDVTEPRMENLPGGICRNFIVAGPRAAVGMLFLLDDAGKLYTIDGDMRELMKSVKSLIGLVDSKS  
PKVLSASYAEDRLRIRFADCEVLGSDANLYPYKEERRELLRMVPVYLIEAKRRQLIIFALS LKGGHRRTM  
MALGVMIAAAILESQAEMGPVHHARPQILLDDAELVGTSMMSRQAALQLKDLNKIDVIVIFPEFQEK  
MVVSLRFFCTEVAIFVIALIVTVGEMLSREPEHAQEEGAGYQKRIRGHSTLFALEVTFDRTNTGRDATP  
GLFLGMGLADPRYGILYVNQPKKKQMPSEPDDDRVDGFELVHAIKEDSAS-  
HELEMPEAMALAVEADASINVTAGVLAMKGGMVAVEKVDSKRKVALAAEKWNISKLELIDVLLSGAK  
PFRSCG-  
IELADLSATLGKKKLWFLFLPSASNAELEEVLKD GAGASTAEAAEDKQIAILLVRPVLIVIQDSNTAGLIS  
NGGLDEWGT MAYKKHYAFAARMRLHMRTIDAIEVGVAMEPNKQKSEKVKTVKLEGDTRFRQLAVE  
GIKEQMP-LHALNPDAFV-LPILVTPAVGSVAADEGV LGATVPVDASL-  
RELQKSQKGTALPISAVRLLAMRAARGMIEEDIMVAGKIAA-  
LLKIRALETIVQIVLRNDSEATVAWRLSVAEKLEADTKRSAGFAARPFKSKPSLCDVQAHARIAEPIQEIA  
AGYVAKEERFVYPVEDIAIKLILASPHSRVGKAKRAGEGHLHGMAKELLAKAVLMCNEPNTNTEGLL  
NYLTNNQPTDLLFEDCLDVIIDIRMSVV-----  
VHLNTV-  
HAVVKGVGEVGDYEIMAAAAASGLVQEERVDDRTGRERTLMW MYGAMEELWLMSLRWADWVV  
DCAIGAILHVYAQSINRAFSRLRLQLD GWPKEARWWNTWQLWLNKDGFFGYAAFRVAKQVLK  
AALADFDMSDSQGVGRYLSKQEIRAGYRIRQNVQFARLDPRADILLQAQTRLSVIRHALAVVAILLRD  
IASEFT-  
VVAYQDVARGHVECVLAECDFTEKNAHIGPVGLRTPESIFGDGTVLNEAVLGKIDLANTVADFRYLV  
LLDGGRALGV EWITLQNMLYARIWLPPAQAAALKNLLPICFFLSHP ELDLVNV-  
ELFLGISKTRAEQLMAGALIEEILEAVARFAEPEATTHQSKVKHFKYYGEEVDPVHLAYILDLFALVSTQ  
VTVSDRLLKDRYVLNLKVFRGFTSLWWLALQLAEKGPAATVITVGTIAGLGALVLFILL-  
RDKVLVETLYRYVY--MRGYSAAKDVADADPEHFLELSAASRDLEWIEIVPAFFYYFDTAT-  
FEPFNTAVAKEFFGLFAERLRVVDVLAVPPDRVLDLVEFVALAGTLATSAEA-  
PGIATGLCEPNAAAVLEAERDWNLHRSMGITLAFFEARES VKGYFDKGLHKGVAEVS LREAGFTTN  
FHCAVEAKRCAPAVHRVLDLGEIEAALIEIDSAVTVADEEQTLADKPTTRDKAVGAIGGVVLAGTMN  
MGANLEQIERSGNIIIEEEEQYHAVNGKKADGKLT DKVLMVLSVAYFPVITRTSSGNALDHGVFDLLI  
DAPADADNLDHGRVMSIPAPTIHAETTPLYADAEIDRIAWIAPLHLLGTLPAVLGFEPDQYSFISMMID  
ASLDITETAEVLDDYHVLEKGSRPPAFRIVLIRGLHIRLLAAVG TILVVGSA GRAEITAYIQGRAVPISM RK  
QTFLPAFAASSCKVVDIFSTMLRPPERSVQMLILETV AEL-

LEVTRLTNDKLERMEVLLPGLDMAELLGLLAAAADFADIVTIDAAVTAILSVAAEAVVLREMLLTKEIAI  
TALALALALLMLTGDKGLTQKDRAREAQMKELIQAGAVLQIHAADAMVLAATADKVRLETDEGTT  
AFASLNLATVSDGFYVLSSAVLQLSSDLMMIVSVARVLADKETKNALVVRHPEQVKTQPTYAEGSPG  
MVLQTLTECIPPLAIKPEEVELLWTLVAALWRVKAHLASAAARPLERVLLLLALGLIIVLMQSEGGMG  
GG-  
MGAAAKVLAAFSILTIKASVGDEVKRVTRRMDLNTLRGRPEEAVNPEFKGEELDQAKYEAVNEVDC  
VETVRRFVDIPFLVSIRTQHNESEDGRARLVLDVTRVRFDL-  
VTKKSDVILVERVETDGIARQMAKDLQSLHEEAAGLGKVSALHFIALNDGHISNYVTAGTHSVLGM  
LLVFIQQVRVSKVWPTRREVTMVFIMAALAIFFLVIGLLLNLVFMVGGISPLQITTLVLGEGIMAVRQ  
VSTFPAES-  
ITILQNTYADLICAGRVTKADIENSLHIVVAARVSRGTWYVIYLYEISQAQSPAGILQRAFRQATLSQSLI  
DGRMEVKIKVVTSDRYA-  
TYEIKGGQHRKGTRYNRVKVGHNIPVEVLARLKMAFHPANLVLVKTFGAVVQKRFAQQLTHIRHGA  
AIGPMEVSSPYIKSKARHAPGDSVVDIKPDNIVRSVAVPELIWARENEDQSAVHEKYVKTTTHKLAA  
KRSTAVDKAQYDKRNQVHLSFIGLAVKVLPEQAIVAATAGTLLPTSSVSVTENLKGVAATIRIDPMEKA  
LIAYIKMRPQLNLAGQTDNKIVKCLNNNLDDVEWGLGRRKIKPLTIKSVYDVEHRRATELVKLMPY  
KDDVEGRKSQFAEK--  
AIFEPLKAFMMLFGFIARAIYALSLRVVRRITLLVKTIVVNADTALSAIKIGVSIRLRHKSTNVADTKHHI  
KTIEARARMTLAGTPAVKLHLSPGRIGKKGGRIKGYMPYKNFNIFEGLASGRRAKVKELAKKKVDKTIT  
VDGIRTRQQGGRLPKADLSNAL-  
NTRVGVDIVGENEQEASNPRANAEMGQIFAAIDARVYSLVAALIGHALEAVLALCAILGIGRAHALLA  
VKLKINAGIEMHSAA-VSEAVAAA-HAQPGGEC-  
VLLDVSEGLDGLVLLMVEASLDVCRLRRRQLGELKKTKEAYMSLTCFSGKGDKVKIVEATQTQAFEIVA  
TRTAERFGIHAKGTYGKERAMMQITPTKPVKVVVPVFNDEELLAPIRAFAETNGDGVTVVKLTKDVK  
ITMFEKAIASLAVAGKATSVVYTVLEKVTESKDIYEQRAKAHYGRGRLRSHVVTTKQKRHLSMMKR  
TVIASPSVNAARLHDGEVSVVTGATMAFVMSEQDAV--  
GDVRMHFQQEPRREAQLGIAGPETFLATEQPRVLALLFLREYLIHIIIGTVGGFADAATIYDILRAMQS  
KLDRKLSADIAKVRMCLHDDVADMGVTEVAARRDTAGDAILSAYWINGVPANTDIILLVANLECAT  
PENIDCAVRLFYQRVTLQAKERGGDVSVLPAKNQIEAAEGTVIYTIKGNKPSTVQMKNIDGISRSI  
VKSLAVQLFQVELFLNDTWIATLLRAAQDVVFDAREGREAVDHVIERDTELEFAPQKDIVARKIRIYTP  
AAPSAVVIWDPAIERADKADAQGTILMIYGPDLQDISCFDIGAEPKIESLSWDEKEKYVVRDDIPA  
DITTLVGKSSKNKEFGIPDVAVCAPAKPGVTESIDRQEPKAGSCGEVANLPYPQESLVNRVSSANVQ  
KNISMVLGGHPIGEMGIARGVERHLETNMCEIFVDKDDIDVALDFYKLELTSRLVGLDKPNAKVEADG  
KESRKLMAVRDGAALQRHPKVSEESGTR-KAGEKAKLPDDTLIFDGVQHGDIKFTATDLPEGRV-  
VTPVVMTVKAQLKIDKVMIKTFHVVTLSFSNDKGEEHLLKRLNALKKSTRHYEMLLKIRDTECAQSPH  
AIPVGKILKIDALLQTICKAHYTAIEPLMAEDLVALGVMGDQGLLHVVPRLMIL---  
HLCELEAALQLPLWGLQQRAVVDQTMGLAIRARDWSY-  
AISEVVGNTFFARSKEDDTEQRLHARNPI-IIL-YGKFGMV-  
ISPSGLRLSSTAPSDQEHGNDEKLILSKERLQDSMYYYILRVLLVFVDEIILAYGSGDQPLKFLVANQAVT  
GRDNPQLVCLTRRTFPLDLQRDPVFLVLTSTMKNLSHRKMHMNLVLVVKPSWVENVSTKILISDQ  
AIASAEDAGAHTQPSESALAVITSRVIPIVLVVSQKPAAPSKTLFLEALNLYDAVSTTVQKSPKRYFIF  
DGDVISVLGSLDAAVILGMQRPQPDRLRRAVTATAIRLAIALRASGIVAALAGLINFSRAVDFAALVY  
PRA-----AFVRNHKVSTKRSRPYKGHTKFLHKAEEEEKALVAEGVDTLA  
>GCA\_000013565

AVIKPITMPVYAPVLMRQTEVATVSGAGSPSLRAKTVFAKSSLQRKTETKRVAADFYY-  
GVLKMSGIVQLVSISVDNRSVCTIAQVVEQEVVHGLVALDAVKKKIALDAIDGMTADDPKAADF-  
-EIELRRMREADDRSDLLPVMLGLTLGVRFNAHEPVVHDLVPVSIFEVI-  
GIMAERGGIDVDECAISNAISDVDPPLAYVSPIDLEAVAGDKMEYIDLEAAVSAVKEGVELEELALESTVL  
VVGI-PLILPV-FGEDGDT-MSFENRARNLGSIVDLAVSSYELPRARIGPSIAAAM-  
MRAAQAAALADKRGTAEIRIVKRMQKAAGLADNPDLVMVEDAAEGNSSWAGQIYDDPISGSSES  
DSVGNIVFAANKRQNFARSITHLRTVEISDQAAAPMMRGVKHNAKSRRSRKIDDAIATLNFNPVPEG  
LALRADGGKPPDSLCHDADERERILLIVRWHTWRTAIIIVLVIAGDIVGLIELGGIAAVGKPDGLLNR  
HHKMNGSLIEQRPIIEKMTLRLRASLKQKLGAEQIIIFVVKVQGDLVAEAAVQM-  
GGVVGAVVAIQGALIYVRRHRQTIITDQESIVTILRGVAEGPADAEALLRIRVDHTLVEMSVLLIPEVPVL  
CESVQIREGVGKALQIIQLDVYLLRNMGTGDETLAESMSRELIRTVLAVDPITAVRLAYGSIKERLGKDL  
KLKDLQ- ----RHLL-  
DVTEPRMRDLDAVCRNMIAAGPGAAGVGMFLLLDDAGKLYSIDGDLRELLKSVKSMIGLADAKAPK  
VLSAQYSTERLRIRFADVEVLQSEAELYAYKEERRELLRMVPVYIIAEAKRRQLVIFTLSLKGGRKAAAAI  
GILIAALLIESQADRGTVDHAEPVILLDDAEVVGSSIMVSRQAALDLKTYKIDVIVIFPEFQEKMVVSLR  
FFCTDVAIFVIALITVVGEMLSREPNHAQDEGAGYNKRIRAHSLFALEVTFDARNCAD--  
VPDLFLGLGILPPRYGIYTNRPKKKQMPAEPDADKVDGFELVHAIKEDGSS-EALEMPEAMALAVE-  
DASINVSAGVLATKGGMVAMERVDSKRKLSLAAERWQIAPIDVMDLRLSGACPVRCMD-  
IGQADISASLGTKALN-  
LFLPKANNAEEEEKLAGAGASTAEAAADRQIAILIVIPVLVVIQDSNAAALNANGGVDEWGTMAYKK  
HYSYAARMRLHMRTID-----DLAPNKQKAEEKIKTAKLEGDTRFRQLVIGGIREQMP-  
LHALNPDAVLLSVLVSPAVGRVAADAAMVGGTVPCPFSL-  
KELQKSQKGSALPISGLRLLPMTAARAMIEEDIFVAGKVAA-  
LLKIRALETVIKILRNDSEAAALAWRLSVAERIAADTKRSSGFAARPFKTKPSLCNTQAHAEIAEPIETIAAG  
YVATEERFVFPVEGLAIQLILASLSRVGTAKRAGEGHLSEMAKELHAKAVLFVRNEPETSTEGLAKHTT  
TGQPTDLLFEECLDVVIDMRRMTIV-----IHLNTV-  
HVVKGVDRDVGDDIMAAAAPSGLVQVERVDDRTGMERTKMWMYGAMEELWLLSIKYADWVVN  
TPIGAILHVYAQTINRAFSKRLQLSGWPPEASRWNTWQLWLNKDGFFGYDAAFR-  
ARVLKDELSDFDMKDTGVARYLSRQEIRAGYRIRENVAFNRDPRQDILLQAMTRLSVIRHALQVVS  
LILREVVSFE-  
VVAQEDVAMGHVECVLADSDFDTAKNADIGPPGLRTPAPIFGDGTVFKDAMLGKMDLSKTVADFRYI  
MLIDGGRQLGVWWVGLRNLLYARIWLPPAEARLKDLPICFFLSHPELD-----  
ISKARADRLMATALIEQILDVAAYAKPEATTHQSKKEPHFKYYGEEVDPVQLTYIISLFALVATQVTVS  
DRLLTDRYVLNLKI-RAETALLWWCLNLAEKGPVATVITVGTIAGLGALVLFILL-  
RDTVLVETLVYRYVY--MRGYSAAKDADANPEHFLPLANVSRDVEFIEIIPAFFYYFTAK-  
FQPFNTAVAREFFGLFAERLRIIDVLVPPDRVETLVELVALAGTLATSADAPPGIATGLCEPNAAVLE  
ADQDFNLHRHMGITLAFFKAQESVKGFFDKGLHKTIAAIGLKEAGALTTTFACGKETQRCVPVVRV  
DLGELEAGLIEKSRVVVADEEQTLADQPTTRDNRVGTVGGVVLAGTMNMGASLDAVERGNIIIIELE  
EETYNVNG--  
KADKLTDKVLMVLSLAYFPVIARVSSANALDKGVIDLLIPAPEDADNLDHGRTMVIPAVTVHVETAPLY  
AEDDIDKIAWVAPLHMLGTIPAVL-  
FEPDHMSFISMMIEASLDIVETAEVLDDYHVLEKGSRPPAFRKILIRGLTIRAMAAIGTIIVVGSAGRDEIT  
AYIEPGAVPISLRKQTFLPFAFAASSCHAVDIFSTMLRPPERSAVQMLILETVAEL-  
LEVTRLENEKLERMLMLLPGLDMAAALGLRAAAKDFSAIVTVDEAIVAILSVAEAVILRELLTLTEIALT

ALALAVALLMLTPDEGLSQKEQPREDQMKELIQSGAILQIHADDAMVLASTADRVRLTDEGTTSF  
ASLNLATVSDGFYVMSSAVLQMSPELMMIVEVARVLADKENKNALVVRDPEQVKTQATYAEGSPG  
MVLQTLTSVPPPLAVKPEEVELLWTLVTALWRVKAHFATAARPRVERILILIAICLIVLLQSEGGMG  
GGGVTQAAKFFAASFILTIKAAVGDEVKVVRRVMDVSSRLGRPEESVNPEFRGAELEQSKYEAEENVE  
VDCLETVRRFVDIPFLVSTRTQHNESEDRGARLVLDVTRVRFDVIVTKKSEILAARAETDGIIARQMSK  
DLQALHPEAAAALGKVSALHFITVQDAHVSNNYVTADIHGVLGMLLLVLFLQQTRVAKVWVPTRKEVT  
MVFLALVAIFFGVIALLLQLVFFLSGISVASLTTLVLGEGVMAVRQTGTFPAEA-  
IGVLQNTYADLIWAGRVSKADIEESLHIIVAARVARGTWYVIYHYEISQAQGEDGILQRAFRQATLSNS  
LIDSRMEVKIKVVTSDRYA-  
TYEIKGGQHRKGTRYFRVKVGHNIPVDVLARVKMAFGDPNLVLVKTFGAVVQRRFAQPLTHVHHGA  
VTIGPMEVSSPYIRQKKARHAPGDAVVDLKPENIVRSVAVPELIWARENEDNMAVHdryTKTTHKIA  
AKRTTAVDKAQYDKRQQVHLSFIGLAVKVLDPQAIVHATSGTLLPTEAVSVTEGLKGVAATIRLDPME  
KALIAYIKRMKPQLNLGGKTDKKIVKCLNNGLDDEWVGKLGRRKIKPLTIKSVYDVEPERATELVRLMP  
YKDDVESRKSFAEK--  
AIFEPLQAFMMLFGFIARAVYALSLRVVRTIVLVKTRIVVNAATILSAIKIIGVSIRLRHKSTNVADTNHYI  
KTIEKRARMTLAGAPDVKLHLSPPGRVGTGGRIKAYMPYKNFNIFDGLASGRRAKVKDLAKLKKVDKEI  
SVDGIRTKQQGGRIQQQLSNALANTRVDVDIVGENVQEESENPRANAEMGQIFADIDARVYHLVAA  
MIGHALEAVLALCAIYGIGRAHALLALRLKVNAGIEFHSA--VPTAVAAA-----  
-----  
LKKTKKEAYMKLTCFSGKGERIKIVEASQTQAYEVIATRTAERQGIRAKGTYGKERAMMQITPTKPKVK  
WVPVVFVSEPELLAPVKAVAETKGDGVTVVKLTDDIKVTMFEKAVASLAVSGQNTSLVYTVLEKVTETAK  
DIIYEQRAKAHYGRGRLRSHVTTTKQKRHLMMRRSVVADPQMDAARLTDGEVSVITGATIAFVMS  
EQDAV--  
GDVDMHFQEEPRAEAATNIGGRETFLATEQPRLLVLLFLRAYLIHIVEIETVGGFNDAATIYDILRAMQA  
KLDRLSADIKVRMVLHDHVTDMGVRQEAPRRESADDAILSFWINGVTANADVILLVANLECKTA  
PENIDCAIRLFYQIRITLQAKERGGDVSVLIPAQNIQIEAAEGTVIYTIKGETPGTSQMVNLNVEAISKSIVK  
SLAVQLFQVTLFTEDTWIDTLRAAETVVFVDAREGKEAVDHVVERDSDLTKGPQKDIVSRKIRIYTPR  
APSAVVIWDPAIDREDKADAQGTLIKIYGPNLQDINCFTDIGAEPKIESIKSWDEKEKYVVHRDDIPEDI  
STMVGKSSKVNKEFGIPDVAVVAPAKPGVTESIDRGEPKAGSCGEVANLPYPQESIVNRVSSANVQK  
NISMVLGGHPIGELGISRSVERHLETSMCEIFVDKADVDVALDFYKLELTPLRVGVDPNPAKVQIDGRE  
ARRLMAVLGDAAELQRHPKVSSGGGTRVGAGAKARLPDDALVLDGVAHGDLPTVTDIMDGRV-  
VTPVINEVKAQLKIDKVLKTFHVVTLSFSSGKGEEHLIKRLNALKKSTRHYEMLLKIRETECGESPHAIP  
VGVVLKIDRLLQTCICVAHYTALEPLAEDTLVLGVAGEQGLLHLVPRLMILAVMTLWGLAAEMEHKPKV  
GLQARRIVTDQTMGLAERDRHYSF-AISEVVGNTFFARTKADETEQRIHARNPI-ILL-YGKKAMV-  
ISPSGLRLASTQPPALQHGNQEKILSPERLQDEMAYYVLRILLVFVDLVVLAYGSGEAPIRFLVAEQAV  
TGKANPGLVCLTRRTFPLDLQKDATFVLVFEDTTMKNLSHRKMHMNVLIIKSGWVVNVSTKILISDQ  
AIASFAEDAGAHTQPSESALALISSRVMAPIVLVVSQKPTAPSKTLFLEALSLEYDEVCTILNAPKRYIYE  
GDLISVMGAVDAVLKGLQRPQPDRLRRAVVAAALRLAIALAASDVRAALQAGTINFSRAVSLSA-  
CYLDHNLIIIDSAIP-PAIAFRVRNHKVSTKRARPYKGHTKFLHKEEMEKSLIAEGVDTIA  
>GCA\_000014045  
AVIKPVTQNEYAPVLMIAQSQVATVSGAGSPSLRAKTVYAKSALQRKTITKWWAKPIYY-  
GVLMGNIVQLVSIISVDARSVCTVAQLVEQEVVHGLVALDAVKRKIALEAIDGMTTEDPAKVAQYE  
EEVELKRFDAEDRSDMLPVMGLGLTLKVRFDPHQPLVHDLPIPVIFEVV-  
GIMADRGGIEVDDCAISQAVSDVDPIEYVSPIDLAAGTEMFIDQETAVAAAARETIALDELALEASIL

VVGKPLILPV-FGEDATV-MSFANRSRTLGSIVDLAVAFPRLSRA-IAA--ASEM-  
MRAAQAKALAEKRGTAEEIRIVKRMSRSAGLADDPPELVMMEDAAEGNSSWAGQIYDDPISGSSES  
SAGNIVFAANKRQNFQRSITFLRRVEISDKAAAPLMRGVKHNAKSRAARKYDDAIALLNANFANVPTGV  
AIRADLGKPAETLLHDAAQGEKILMIIVRWHVTWKTAVIVVLITDAGNIVGLIELGGIAAVGKPDGTLN  
RHHKLNGSLIEQRPIIEKMTLRLRASLKEKLGKDQVIFVVKVQGDLVADATVQM-  
GGTVGAVVAVQGEVIFVRRHKQTVVTDQEATV-ILRGVAEGPADAQALLRIRVTHTLVKISVLLIPE---  
LVDAVTIREGVGKALQIIQLDVYLLRDMGTGDETLAESLSRETIRDVLAVDVTGTGRLAYGQIKERLAKK  
LTLKDLETML--LSIL-  
DITEPRMENLPDGVCRFTVTAGPRAAVGMIFLLDDAGKIYSIDGDLREVTKSVKSLIGLVDKAPKVL  
ASYATDRLKVRFADCEVLEAEADLYAYKEERRQLFRMVPVYIVLEAKRRQLVVFALS LKGGHRRQAAL  
LGVLIAATLLESQAIEGAVNHASPAILLDDAEIVGTEIMISRQSSLQIKDRVKIDVIVVFPEFQEKMVVSLR  
FFCTEVAIFVIALIVTVGEMLSREPEHAQEDGAGFSKRIRAHSVLFALAVSFDRRNLRCDRQ-  
DLFLGLGLAPPRYGILYKNQPKKKQMPSEPDADRVDFELVNAVKEGAD-QELDMPEAMALAVE-  
DATINVSAGVLATNGGMVAVEKVDSKRKMSLAATKWNISKIEVWDVTLSGAAKVRALS-  
IELADVSAALSSKKVWFLFLPGASNEEELEAKLDGAGASTAEAAEDRQSPILLVVPVLVVIQDSNTAGLI  
SNGGLDEWGTMAYKKHYAFAARMRLHMRITDIEGVGVEMMPNKKQSEKIKTVRLEGDTRFRQLATE  
GVKEQMP-LHALNPDAFV-LPLLVTAVGSAADAGVLGARVPVDASL-  
RELQKSQKGSALPISAIRILDMRAARAMIEEDIMVA-----  
LLQITALETVVQLVLRNDSEAILPWRLSVAERLEADTKRAAGYAARPFSSKPSLCDTQAHAIADPIQEI  
AAGYVATPDRFVFPVEGIAIQIVLSNPHSRVGGAKRAGEGHLHEMAKELMAKAVIMLQNEPDTNTEG  
LMNYITTNQPTDLLFEDCLDVIIDMRMSVV-----  
IHLNTV-  
HVVVEGVRDVGNYAIAAAQAPSGLIQMervDDRTGRERTLMWMYGAMEELWLLSVRYADWVTD  
TPIGAIILHVYAQVINRAFS LKRLQLD GWPKEASRWWNTWQLWLNKD GFFGYEAGFRA-  
KQVLKAALADYEMKDVHGVARLLSRQELRAGYRIRQQVPFARLSPRTDILLQAQTRL SVIRHALTVVAI  
LVLRDVATEFT-  
VVAMEDVAMGHVECVLADSFAFTAKDADIGPAGLRTPDTIYGDGTVLKDAVLGKVLANTVADFRY  
RMLIDGGRALGVSWADL-  
NMLYPRIWVPPAQAALKNLTPITFFLSHPELDLWRVFS LWSGISKARADQLMASALVEEVLEGVARFA  
DPEATTHQSHKERHFKYYGEEVDPVHLAYILKMFALVATQVTVSDRLLKDRYVLNLTV-  
RGFTSLLWMSIQLSAKSPSATVITVGTIAGLGALVLFILLMRDSVLLETLYFRYVY--  
MRGYSAAKDVADADPEHFGPLAAASRDMEWIEIVPAFFYYFATAG-  
FEPFNTAVAKEFFGLFEERLRLVDVLAVPPDRVEALVEFVALAGTLPTSADTLPGVIATDLCEPNAAA  
EAERDWNLHRTMGITLAFKKAQISVKGWFDKGLHKDVAETGLSEAGGFTTPFHAGKSAKRCVPVHR  
VIDLGELEAGLIEIDSAVLVADEEQTLADQPTTRDNSVGAIGGVILAGTMNMGSSLDQVERGGNIIIELE  
EEQYHAVNGKKADGKITDKILMVLSRAYFPVIERVASGTALDRGVFGLLIQAPDDADNLDHGQPLVIP  
ASTVHAETTPLYAESEIDKIAWVAPLHLLGTAAVLGFEPDHYSFISMMIEASLDITETAEVLDYHVLEK  
GARPPSFRKILIKGLHIRLLAAVGTILVVGSAGRSEITAYINGQAVPITMRKATFLPAFAASSCKTVDIFST  
MLRPPERSTIEMLILETVael-  
LEVTRLENDKLERILILLPGLDFAVIMDLAAVAKDFSQIVTISAAITAILSVA AEKVVLREMLLTkAEIAVTA  
LALAMALLMLTADAGLTQKETARDRQLTELIQGGVVLQVRVEDGMVLAATADKVR LSTDEGTTSAF  
ASLNLATVSDGFYVLSSAVLQLSSDLMMIVAVSRVLADKESKNALVVRHPEQVKTQPTYAEGSPGMV  
LQTLTACIPPLAIKPEEVELLWTLVAALWRVKSQIASAMRPRLERVLILILALGLIVVLLQSEGGGMGGG-  
MGAAAKLLAAFSILTFKASVEDEVKVTTRRVMDLNSRLGRPEEAVAPEFRGEELEQNKYEAENVEVDCI

ETIRRFVDIPFLVSTRTQHNESEDRGSRMVLDVTRVRFIDL-  
VTKRSEIILVERAETDGVIAEQMAKDLQALHPEAAALGKIAALQHFISVNDGHISNYVTAEINSVLGML  
LLVLFIQQVRVSKVWVPTREVTMVFIILAAVFFLVIGLSVNLVFMVGGISVAQITTLVLGEGVMAVR  
QVSTFPSES-VTILQNTYADLICAGRVTKADIEKSLHIVVGARVARGTWYVIYHYEI-  
QAQGPAGIMQRAFRQATLSQSLIDGRMEVKVKVVTADRYA-  
THEIKGGQHRKGTRYNRVKVKNIPVDLIARIKMAFAPPNLVLVKTFGAVVQKRFAQQLTHMRHGA  
VSIGPMEVSSPYIRSKKARHAPGDSVVTIKPDNIVRSVAVPELIWARENEDQSAVHDKYTKTHKIAA  
KRSRAVDKAQYDKRNQVHLSFIGLAVKVLPEQAIVHATAGTLMPTSSEAVTESLKGVAATIRLDPMEK  
ALIAYIKMRPQLNLGGQTDKKIVKCLNNNLDDVEYGKLGRRKIKPITIKSVYDVEHERATELVKLMPYK  
DDVEGRKSQFAEK--  
ALFEPLQAFMMLFGFIARAIYALYLRVIRRTILLAKTKIIVNASTVLSAIIIGVSIRLRHKSTNIADTKHHIKT  
IEKRARMTLAGSPSVKLHLSGDRVGTGKGRIKGYMPYKNYNIFDGLASGRRRAKVKELAKLKKVDKSISV  
DGIRTRQQGGRIKADLSNAYANTRVGVDIVGENVQEESENPRANAEMGQIFAAIDARVYSLVGALIG  
HALEAVLALCAILGIGRAHVLLAVRLKVNAGIELHSAA-VAQAVAAA-  
YAQNGGQAAILLDVSEAYLGALISQASVDVCRPTNRRLG-  
LKKTKKEAYMSLTCTFGKGDKIKIVEASQTQAFEIVATRTAERFGIKAKGTYGKERAMMQIVPTKPVKV  
WVPVFNDDPELLAPIRAFAETNGDGVTVVLTDKIKVTMFEKGVASLAVTGKATSVIYTVLEKVTLMK  
DIIYEQRAKAHYGRGRLRSHVVTHTKSQRHLSMIRRTVVADPSMEASRLTDGEVSVITGATMAFVMS  
EQDAV--  
GDVDMHFHEEPRREAQLGIAGPETFLATEQPRLLALLFLQEYLIHIVIDIGTVGNFSDAATIYDILRAMAN  
KLERKLSADIAKTRMCLADDVADMGVTELAARRESAGDPILSAYWINGVTANADIILLVANLESKLTP  
NIDCAVRLFYQRITLQAKERGGDIEVALVPAQNQIEAAEGTVIYTIKGTTPSSSQMKLTIEAISRSIVKSLA  
VQLFQVDLFVNDTWLGTLLRAAGDVVYVDARDGKEGVDHVVERDTLLEFAPQKDIVARKIRIYTPAA  
PSAVVIWDPAIEREDKADAQGTILMIYGPDLQDISCFTDIGAEAKIESLASWDEKEYVVRDDIPEDIT  
TLVGKSSKVNKEFGIPDVAVCAPAKPGVTESIDRGEKAGSCGEVANLPYPQESLVNRVSSANVQKNI  
SMVLGGHPVGEMGISRGIERHLETNMCEIFVDKADVDVALDFYRLNLTAMRVGLDNPNAKVEIDGRE  
SRKLIQVQDGDADLQRHPKLSEESGALRKAESKAKLPDDTLILDGVAHGDVSFTVTDLPEGRV-  
VTPVNNAVKAQLEIDKVLTKTFHVVTLSFSNNKGEDHLIKLRLNALKKSTRHYEMLLKIRDTECATSPH  
AISVGKILKIDSLLQTICTAHYTEIEPLMAQDLAALGVMGDQGLLHVVPRLMILAVLVLFGLARSYVVPK  
WDTQAVAIITDQTMGLPTRGRGWSF-CISEVVGNTFFARTKDDDEQRLHARNPI-VLL-  
YGKMGMV-  
ISPSGLRLDSTAPDAQGHGNENALILSRENLQDAMSYYVLHVLLVFVDLVVLAYGSGDRPLKFLVAN  
QAVTGRKNPQLVCLTRRTFPLDLQRDATFVLVFEATMKNLSHKKMHMNLVLIKSGWVANVSTKIL  
ISDQAIASAEADAGAHTQPSSESALAAITSRVMAPIVLVVSQKPTAPSKTLFLEALNLLDAVTATVLNPKP  
RYFVFEADLVLSILQSVDAAVLKGMQRPQPDMMRAVVAQAIRLAIGLR-----  
LEAGIINFSAVTFAG-FYSALEC-GGGAIT-  
EAIAFRVRNHNKVNTRKRPYKGTHTKFLHKADSDKALIADGVDTIA  
>GCA\_000014065  
AVIKPVEINKYAPVLMIRQTQVATVSGAGSPSLRAKTVFRKSGLQQRKTMKWVQSPLY-  
GVLKMGNIQVLVSISVDNRAVCTVAQVVEQEVVHGLVSLDAVKRKIALEEMDGMTTEDPAKVAEF  
EEELDLKRFRDADARADMLPVMLGLTLQVRFPHEPVVHDLPIPIYEV-  
GIMADRGGIEVDDCAISNAVSDVDPIAYVSPIDLA AVAGEKMAYIDQEA AVGAAKEEIALEALESVV  
LVVGI-PLLLPV-FGADGDV-MSFAARSRTLESIVGLAVAAAELTRA-ID-GIASAM-  
MTAAQAEALAEKRGTAEEIRIVKRMQRSSGLADDPDLVMLEDTAEGKASWAGQIYDDPISGSSES

LGNIVHAANKRQNFARSITFLRKVEISDKAAAPLMRGVRHNSKSRAARKVDDAIADLNFPNVPAGIAI  
KALAHKSEDRLHLDATETEGILLIVVRWHVTWKTAVAIGLTFLAGDIVGLIALGAIAGIGKPDGLLRHH  
KLNGLIEQRPIIEKMTLRRLRASLKEKLGKDQIIIFVVKVQGDVADATVQMG-  
GPVGAVVAVQGDVIFVRRHKQTVITDSESTV-ILRGVAEGPADAEALLRIRVNHTLVLSVLLIPE-  
PVLVDNVSIREGVGKSLQIIQLDVYLLRDMGTGEETLAESKSREVIREVLAI DPITGVRLAYGKLKERAGK  
KTGLKDLETLF--  
RSILAAVTEPRMENLPEGVCRTFITAGPRAAVGMLFLLLDDEPGKLYPIDGELRELTKSVKSLISLVDKAP  
KVL SAGYAEERLRIRFADCEVLASEAELYAYKEERREMLRMVPVYIINEAKRRQLILFALS LKGGHKRAM  
MALGVMLAAAIIESQADKGAVHHDEPAILLED AEVTGTSIMVSRQASLELKHVAKVDVIVFPDFQEK  
MVVSLKFFCTEVAIFVIALIVTVGDMLSREPEHAQEDGAGYSKRIRGHSVVFALFAVDFRRNCRSAKLG  
DLFLSLGLLPPRYGVFYTNQPKKKQMPSEPDGDRVDGFELVHAVKEDGSSNHELEMPEAMALAVEAT  
ETINLSAGVLALS GGMVAIERVDSKRKVALAATKWNISRIDLLDVAISGAAPIRCCG-  
IEECDLSAALGAKKV-  
FLYLP GASNAELEEELKGGAGNSTADVAEDRQREILLVHPVLVVIQDSNSAGLISNGGLDEWGT MAY  
KKHYAFAARMRLHMR TIE-----MEPNKQKSEKVKTVKLEGDTRFRQLAIEGVKEQMP-  
LHALNP DFAV-LPILVTPAVGSVAADAQVLGATVPVDASL-  
RELQKSQKASALPISGIRLLDMRAARGMIEADIMVAGKIAA-  
LFKIRALETIIGILLRNDSEATLPWRLSVAERLEADTKRASGFAARPFKTKPSLCTTQAHARIADPIQEIAA  
GYVATEERFVFPVEDIAIRLILYKPHSRVGEKKRGGEGLHLSMAKELLGKAVVMLRNEPGTNT EGLLNY  
LTTNQPTDLLFEDCLDVIIDIRMSVV-----  
VHLNTV-  
HVVVAGVAPVGDYEIMNAAFPSALIQVEQVDDRTGEEKTLMWWMYGAMEELWLMSVRWADWVAN  
CAIGAILH VYAQTLNRAFSLKRLQLD GWAKEAARWWNTWQLWLNKDGFFGYEAAFRA-  
KQILKAALAD FEMKDV EGVGRYLSKQEIRAGYRIREQVDFARLDPRTDILLQAKTRL SIIRHALQVVAILI  
LRDIAPEFT-  
VVAYQDVARGHVECVLAESFDFTEKDAHIGPVGLRTPDIYGDGTVFKEAVLGKIDLANTVAEF RYLV L  
LDGGRELGV EWWTLQNMLYDRIWLPPAQAALKNLQPICFFLQHPELDM-----  
ISKARADQLMAGAMIEEILEAVARFAEPEATTHQSKKAKHFKYYGEEVDPVHLAYILDLFALVATQVVL  
SDRLLKDRYVLNLKV-  
RALTSLWWMSLQLAEKGPCATIISVGTISGLGALVLFILLMRDSVLVETLFYRYVYF-  
MRGYSAAKDVQDADPEHLL ELAAASRDIEWIEIIPAFFYYFDTAT-  
FEPFNTAVAREFFGLFKERLRVIEVLAVPPDRVEALVEFVALAGTLGTSADAAPGVIAFGLCEPNAAGVL  
EAERDWNLHRSMGITLAF FEARDSVKGYFDKGLHKAVA EFSLKEAGAMTTHFRCDVEAKQVVP AIHR  
TLDLGDIEAALIEIDS AVVVSEEEQTLADKP TTRDKSVGAVGGVVLGATMNMGANLDSVERGGNIIEL  
EEEQYHAVNGKKADGKLT DKVLMVLSVAYFPVIARFASANALDRGVFGLLIDAPTDADNLDHGRDM  
SIPAPTVHAETAPLYAESDIDRIAWIAPMHLLGTLD AVLLFEPDFQGFISMMIDASLEIMETA EVMEDY  
HVLEKGARPPGFRVVLKGLHIRLLAAVG TLLVVG SAGRTEVTAYIQGRAVPISLRKQTF LPAFAPSSCIV  
VDIFSTLLRPPERSVEMLILETVAEL-  
LEVTRGTNDK LERMQVLLPGLDMAELLDLLAAADD FADIVTIGAAITAILSVA AEAVV LREMLLT KAEIA  
ITALALAMALLMLTGDTGLTQKESAREAQMKDLIQAGAVLQLHADDAMVLAATADKVRLSTDEGT  
TSAFASLNLATVSDGFYVLSSAVLQMSSDLMMIVSVARVLADKESKNALVVRHPEQVKTOPTYAEGS  
PGMVLQTLTGCIPLAIKPDEV ELLWTLVAALWRAKAHLASAARPHNERVLILLALGLIVVLLQSEGG  
GMGGG-  
ATAAAKLLAAFSILT LKAAVGDEV RKVTRRVMDLSSRLGRPEEAVNPEFKGEELDQTKYE AENVEVDC

METVRRFVDIPFLVSVRTQHNESEDRGARLVLDVTRVRFDL-  
VTKKSDVILVERVETDGIARQMAKDMQSLHPEAAALGKVSALQHFIALGDAHISNYVTAATHSVLG  
MLLLVLFIQQVRVSKVWVPTREVTMVFIMAALAAFFVIGLVNIVFMVGGISPLQITTLVLGEGVM  
AVRQTSTFPAES-  
VTILQNTYADLICAGRVTKADIESSLHIVVGARVARGTWYVIYHYEITQAQSPAGIMQRAFRQATLSQS  
LIDGRMDVKIKVVTSDRYA-  
TYEIKGGQHRKGTRYNRVKVGHNIPVEVLARIKLAFGPPNLVLVKTFGAVVQKRFAQPLTHMRHGAV  
TIGPMEVSSPYIKSKARHAPGDSVVDIKPDNVVRSVAVPELIWARENEDQSAVHEKYVKTTHKIAA  
KRNRAVDKAQYDKRNQVHLSFIGLAVKVLPEQAIVEASAGTLLPTESVAVTENLKGVAATIRLDPMEK  
ALIAYIKMRPQLNLQGKTDNKIVKCLNNNLDDEVWGKLGRRIKIPITIKSVYDVEHTRATELVKLMPY  
KDDVEGRKSQFAEK--  
ALFEPLKAFMMMFGFIARAVYALSLRVVRRITILLVKTIVVNANTVLSAIKIIGVSIRLRHKSTNVAETKH  
HIKTIEARARMTLAGAPSVKLNLRPGRVGKKGRIKGYMPYKNYNIFDGLASGRRAKVKELAKLKKVD  
KTIAVDGIRTRQQGGRLPKADLSNALSNTDVDVEVVGENEQESNPRANAEMGQIFAAIDARVYSLV  
AALIGHALLAVLAICSLIGIGKAHVMLAVKLKINAGIEMHSAA-VAQAVAAA-  
YSQPAGEATAIADVSEGD LGALAITEDSLDVCRLRRRQLG-  
LKKTKKEAYMSLTCFAGKGDVKIIEATQTQAVEIVATRTAERHGIAKAGTYGKERAMMQITPTKPVKV  
WVPVFNEDELLAPVRAFAETNGDGVTVVKLTTDVKVTMFEKGVASLAVSGKVTTLVYTVLEKVTLS  
KDIIYEQRAKAHYGRGRLRSHVVTHTKQKRHLSMMKRTTVADPSMDAARLTDGEVSVVTGATMAFV  
MSEQDAV--  
GDVDMHFHEEPRREAALGIAGPETFLATDQPRLLALLFLREYLIHIVDIDTVGNFSDAATIYDILRAMQN  
KLDRKLSAEIAKVRMCLSDDVADMGVTDLAARRDTAGDAILSAYWINGVTANSIILLVANLECKTV  
ENIDCAVRLFYQRITLQAKERGGDVSVRLVPAQNQIEAAEGTVIYTIKGNPSTAQMKNIEAISRSIVK  
SLAVQLFQVDLFLNDTWIATLLRAAEDVVYVDAREGREAVDHVVERDTELELAPQKDIISRKIRIFTPAA  
PSAVVIWDPADREDKADAQGTLMIYGPDLQDISCFTDIGSEPKIESLAAWDEKEYVVRDDIPEDI-  
TLVGKSSKVNKEFGIPDVAVCAPAKPGVTESIDRQEPKAGTCGEVANLPYPQDSLVNRVSSANVQKNI  
SMVLGGHPVGEMGISRDVERHLETNMCEIFVDKEDVDVALDFYKLSLTPLRVGLDKPNAKVQIDGKE  
SRKLMAVRDGEAKLQRHPKVSESGTRIGADEKAKLPDDALIYDGVQYGDLSFTATDLPAGRV-  
VTPVFNAVKAQLAIDKVMLKTFHVVTLSFSNDKGEEHLIKRLNALKKSTRHYEMLLKIRDTECAQSPH  
AIPVGKILKIDALLQTICKAHYTAIEPLLADLTALGVMGDQGLLHVPRMLAVLHVMDLEAEFQLST  
WSLQEAALVTDQTMGLPLRDRAWSF-AISEVVGNTFFARSKDEDTHERLHARNPI-MIL-  
YGKEGML-  
ISPSGLKLASTKPTEDDHGNTNKLILSTERLQDSMSYHILAILLVFVDEVILAYGSGEDPLKFLVAEQAVT  
GRANPQLVCLTRRTFPLDLQRDAVFVLVLEDTTMKNLSHKKMHMNLVLVKPKSWVENVSTKILISDQ  
AIASYAEDAGAHTQPSESALAIITNRVIAPIVLVLSQKPAAPSKTMFLEALNLYDEITATVAKRPKRYFIFE  
GDVISILGTLDAAVILGMQRPPDRLRRAITAIRLAIALRGSGVLAQLEGEAINFSRAVSLAA-VY-  
DLTLAQAAPLPAIDFRVRNHKTSTKRDRPYKGHTKFLHKAEEEEKALVAEGVDTLS  
>GCA\_000018145  
AVIRPITMDTYAPVLMIRQQQVATVSGAGSPSLRAKTVYAKSGLQRKTRTKWVTKPLY-  
GVLKMGKIVQLVSISVDNRTVCTVAQLVEQEVVHGLVAFEAVKRKIALQEIEGMTAEDPAKVADYM  
LEVEIKRLREAEDRADMLPVLLGLTIGIPDPHQPVVHDLPPVPIYEV-  
GIMAEKGGIEVDDCAISTEVSVDVPINYSVIDLAKVAGDQMAFIDQETAISAARDAIALDELALESSIL  
VVGI-PLILPI-FGEDGDN-MSFAARARTLESIVDLAVSYPELPRA-IAE-IAAAM-  
MARMRAAALASKKGTAEEIRIVKRMQRSGGLADNQDLVMLEDAAEAGNSSWAGQIYDDPISGSSES



SAGNIVYAANKRQNAERSITFLRKVEISDSADAPLMRGVKHNSKRSKRKIDDAIATLNFPNVPEGLAL  
RAEAGKPADTLLHDAAEGEKILLIIVRWHTWKTAIIMLTYTAGDIVGVIMLGGIAAVGKPDGLLNHRH  
HKLNGSLIEQRPIVEKLTLLRLRASLKQKLGAEQIIIFVVKVSGDLVAEATVQM---  
GVGAVVAIQGKVIFVRRHRQTLVTDSEATV-ILKGVAEGPADAQALLRIRVTHTLVELSVLLIPE-  
PVLVESVSIREGVGKILQIIQLDVYLLRDMGTGTETLAESASRELIRSVLNIDPITGVRLAYGHLRERASKE  
LTLKELETLL--  
LSLRQDVTEPRMEDLPDGVCRFTFIVAGPEAAVGMLFLLDDAGRLYRLDGELRELPKSVKSMISLVDAR  
KPKVLSAVYVEDRLRIRRADVEVLESEADLYAYKEERRELLRMVPVYIVLQAKRRQLVLFALS LKGGHRR  
ARASLPVLLAAAIQESQAVKGAVHHEAPATLLQDAEVVGSSMMVSRQASLELKAVAKVDVVVFPEF  
QEKMVVSLRFFCTEVAIFVIALIVTVGAMLSREPSHAQESGAGYQKRIGAHAAALFALAVTFERANLGSD  
ACPALFLGLG-LPLRYGVVYTNQPKKKQMPSEPDEKVDGFELVHAIKEDGSK-  
EELEMPEAMALAVEADATINLSAGVLALTGAMAAVERVDSKRKLSLAVEKWSIAPYDTLDLKL SVGAK  
FRCLQ-IEEGNITAALEVKNV--  
LYLPGASNAEEEEKLDGAGASTAEAAADRQSRILLVTPVLVVIQDSNAASLVANGGVDEWGT MAYK  
KH YAFARMRLHMRID-----  
RMEPNKQKSEKVKTVKLEGDTRFRQLATEGVKEQMPVLHALNPDAVLT PVLVTPAVGAVAAEEALL  
GATVPCPFSL-RELQKSQAGAALPISGVRILPMRAARAMIDEDIFVAGKVAA-  
LLAILALETVMALILRNDSEARIPWRLSVAERLEADTARASGFAARPFRSKPSLCDTQAHAKSAEPIQEI  
ATGYVAVEQRFVFPVEGIPIQLITSPHSRVGA AKRAGEGHLHEMAKELLARAVLMVQNEPGSNTEGA  
LKYLTTNQPTDLLFREALDLVIDLRRMTVV-----  
IQLTTV-  
HIIIEGARDLGARQIMAAAAESGLVQVERIDTLPGPRTAMWWMYGSMEDLWLMSVTWADWVPDCA  
IGAILAVYAQAINRAFSLKRLQLDGWPKAAARWWNTWQLWLNKDGFGYGYDAAFRAVKQVLKAALF  
DYAMSDVQGVGRYQSRQELRVGYRIREQVEFERLDPRRDILLQAKTRLSVIRHALAVVSILILREVGEF  
T-  
VVAEEDVAMGHVECVLAESFDFTAKDADIGPPGLRTPDPIFGDGSVFQEAVLGKVDLANTVADFRYR  
MIIDGGRRRLGVSWTPLTNMLYPRIWLPPAQAALKDLLPICFFLGHPELDLEMWE-LFA-  
ISKARAARLMAGALVERILEKVAFAAPEATTHQSHKEKHFKYGEEDPVYLAYVLELFALVATQVTV  
SDRLLKDRYVLNLKV-RSLTALWWWVSLNLGGKSPCATVITVGT VSGLGALVIFIILL-  
RDSVLVETLFYRYVYV-MRGYNAAKDVADADPEHLLSLATVTRDVEWIEIIPAFFYFRTAG-  
FQPFNTAVAREFFGLFAERLRLVAVLAVPPPRVEVLVEFWAWAGTLATSAEALPGVIACGFCEPNAAA  
VLEADRDWNLHRAMGITLAFYEARES VKGWFDKGLNKDVAETGLSEAGGLSTPFHCALTAKRCVPVI  
HRVLDLGEIEAALIEIDS AVKVADEEQNLADQPTTREKAVGAVGGVILAGTMNM GASLDQVERSGNII  
IEEEEEQYHAVNG-  
KADGKLTDKVLMLVSEAFFPVIRRTSSANALDKGVFGLLV PAPDDADNLDHGGQLVIPAAATIHGEQA  
ALFAEDEIDKIAWIAPLHLLGTLPAVLLFEPDQYSFISMMIDASLEIMETA EVLDDYHVLETGSRPPAFRV  
VLIRGLFLNRLGAIGTIIVVGSAGRSEATAYIAGGAVPITLRKATFLPAFAPSSCVAVDILSTLLRPPERSAV  
QMLILETVTEL-  
LVVTRFENEKLERLLVLLPGLDVAELLGLLAAAADFATIVTIDA AAVVAILSVAAEAVVLR ELLSMIEIAITA  
LG LAIALLFMLTRDMGLTQKEAAREEQVKELIQGGVVLTVHASADMV LASTADRVRD TDEGTTSAF  
ASLNLATVSDGFYVLSSAVLQLSADMMMIVEVARVLADKENENALVVRHPEQVK TQPTYAEGSPGM  
VLQTLTGAVPPLAIKPQEVELLWTLVAALWEAKAHLASATRPHAERILVLL LALALIVVLLQSEGGGMG  
GG-  
ATSAAKILAAFSILT LKAAVGDEV RKVARRVMDLNSRLGRPEEAVTPEFRGAELEQTKFEAENVEVDCL

ETIRRFVDIPFLVSVRTQHNESEDGRARLVLDVTRVRFIDL-  
VTKKSEIILVERAETDGVIAREMKGDLQALHPEIAALGKIAQLQHYISLGDGHISNYVTQDIHSVLGMVL  
LVFLQQVRVSKVTWPTRKEVSMVFAMAILAIFFFVIGLFVQLVFMLSGISPLQITTLVLGEGVMAVRQ  
TSTFPEDS-  
IGVLQNTYADLICAGRVTKADIEASLHIVVGARVARGTWYVIFNYEINQAQAPDGIMQRAFRQATLSN  
SLIDGRMEVKIKVVTSDRYA-  
TYEIKGGQHRKGTRYNRVKVGHNIPVELLPRVKMAFGPPNLILVKTFGAVVQRRFAQPLTHIRHGAVTI  
GPMEVASPYIRMKKS RHAPGDSAVDLKPDNIVRSVAVVPELIWARENEDNSAVHEKYTKTTHKTAAK  
RNRAVDKAQYDKRQQVHLSFIGLAVKVLPEQA-----  
--  
RMRPQLNLQGKADHKIVKCLNNGLDDVEWGKLGRRKIKPITIKSVYDVEHERATELVRLMPYKDDVE  
GRHSKFAEK--  
AIFEPLKAFMMLFGFIARAVYALSLRVVRRTILLVKTRIVVNADTVLSAIIIGISIRLRHKTNNVADTNHYI  
KTIEKRARMTLAGAPSVKLNLRPGRVGMKGGRIKGFMPYMNFNIFEGLASGRRAKVKDVAKLKKVKDK  
EITVDGIRTRQ-  
GGRI PQADLSNALSNTVRDVEVTGETIQEESNPRANAEMGQIFAAIDARVFALVGALIGHALEAILALC  
AIMGIGRAHALLAVRLKINAGIEFHSA-VPRAIAAA-YSQHGGDA-  
AIADVSEGLDGLSVTEATIAVCMARARQLQE-----  
-  
RFGIRAKGTYGKERAMMQILPTKPKVWVPIFVSEPELLAPIRAVAETCGDGVTVVKLTKDIKITMFEKA  
VASLAVSGKATTVVYTVLEKVTLMKDIIYEQRAKAHYGRGRLRSHVVTHTKSKRHLSMMRRTVVADP  
SMDAARLLDGEVSIITGATIAFVMSEQDAV--  
GDARMHYHEEPRREAELGIAGPETFLATEQPRVICVFLKEYLIHIVIDIGTTGGFADAATIIDILRAMQN  
KLDRKLSADIAKTRMCLHDDVKDMGVTAEAPRRDAAGDPILSAYWINGVTANADIILLVANLECATA  
PENIDCAIRLFYQRITLQAKERGGDVTVALVPAQNQIEAAEGTVIYTIKGSTPSTVQMRLNIEGVSRIV  
KSLAVQLFQVDLFTNDTWIDTLLRAARDVVYVDARDGKEAVDHVIERDTELELAPQKDIIRRKIRIYTPA  
APSAVVIWDPAIDRADKADAQGTIIKIYGPDLQDISCFTDIGSEPKIESIKSWDEKEYVVRDDIPEDI-  
TMVGKSSRVNKEFGIPDVAVVAPAKPGVTESIDRQEPKAGSCGEVANLPYPQESLVNSVSSANVQKN  
ISMVLGGHPVGEMGISRAIERHLETNMCEIFVDKDDIDVALDFYLIDLT-  
LRVGLDPPNAKVEIGGRETRKLMMAVRDGEAKLQRHPKLSEANGTG-  
KGGSKARLPDDALIHGCVHHGDLKFTVTDLPEGRV-  
VTPVFNAVKAQLSIDKVLLRSFHVVTLSFSNDKGDDHLIKLRLNALKKNTRHYEMLLKIRETECAESPHA  
IPVGKILKIEALLQTICQGHYTAIEPLLADDLTVLGVLDGQGLLHVPRLMILAMLHLWGLEIALTIPTWA  
LQADACVTDQTLGLRVRARAWSF-AISEVVGNTEFFARTKAGETEQR LHARNPI-MIL-YGKEGLV-  
ISPSGLKLASTAPDNLGHGNRDKLVLSKERLQDGMSSYYIRVLLVFVDEVLLGYGSGDTPKFLVADQA  
VTGRDNPGLVCLTRRTFPLDLQRDATFVLVFEDSTMKNLSHKMMHMNLVLIKSGWIEENVSTKILISD  
QAIASYAEDAGAHTQPSSESALAVITARVIPIVLVVSQKPTAPSKTLFLEALNLLEAVTCTILNPKPKRYFIF  
EGDLVSVLVAIDAAVLVGMQRPQPDRMRRAIVATAVRLAIAQA-----  
LEAGILNFARAVSLAVRAYPLMTLLPAAAIA-  
PIIAFRVRNHKVSTKRARPYKAHPKFLHKADTEKALVADGVDTLA  
>GCA\_000152605  
AVIKPVIQNEYAPVLMIAQTQVATVSGAGSPSLRAKTVYAKSALSRTMTKWVAAPIYY-  
GVLKMGNIVQLVSISVDNRSVCTVAQLVEQEVVHGLVALAAVKRKIALDEIDGMTTEDPAKVAQFE  
EELDLKRFRDADDRADMLPVMLGLTLKIKFDPHQPVVHDLPIPVIFEVV-

GVMADRGGIEVDELAISQISISDVPDIEYVSPIDLA AVAGDAMAFIDQEAAVAAA RETIALEELALEASIL  
VVGIKPLLLPV-FGDAADV-MSFANRSRTLGSIVNLAVAFPEIKRA----AFAADM-  
MRAAQAEALAEKRGTAEEIRIVKRMQRSAGLADDPDLVILEDAAEGNSNWAGQIYDDPISGSSES  
AGNIVY-  
ANKRQNFQRSITFLRKVEISDKAAAPLMRGVKHNSKSRASRKVDDAIATLNFPNVPEGIAIAAAAGRP  
ADTLLHDATEREEILLIVRWHVTWKTA AIVILLVEAGDIVGLITLGGIAAVGKPDGLLNRRHHKLNGSLIE  
QKPIIEKMTLRLRASLKQKL GKDQVIIFVVKVQGDLVADATVQM-  
GGPLGAVVAVQGEVIFVRRHKQTVIGDQETTVEVLKGVAQGPADAEALLRIRVSHTLVKISVLLIPQ-  
PVLVDAVSIREGVGKALQIIQLDVYLLRDMGTGEETLAESVSRETIRDLAVDPITGVRLAYGDLKERLA  
KKLVLKDLET-----  
LSIMADVTEPRMQDLPAGVRRFTITAAPRAAVGMIFLVLDEAGKIYPIDGDLRELQKSVKSLIGLVDAK  
VPKVL SAGYATQRLKIRFADCEVLNAEADLYAYKEERKELLRMVPVYIILEAKRRQLIVFLLSLRGGHRRRA  
MAAIGVMLAAAI ESQA EKDPVNHAQPAILLDDAEVVGTAIMVSRQAALQVKDRSKVDVIVVFPEFQ  
EKMVVS LKFFCTEVAIFVIALITTVGEMLSREPEHAQEDGAGFGKRIRDHSM LFALRVVFERTNLRSDAT  
PDLFLGMGLAPPRYGILYTNQPKKKQMPTEPDSDRTDGFELVHAVKEDSASNHELEMPEAMALAVE-  
DAPINVSGGVLAMTGGMVAVEKVDSKRKMSLAATKWTISKVPMLDIHLSAASQFRCL-  
IELADLSASLGLKAD--  
LFLPGASNEELEDKLNAGASTADVAADRQGSILLVIPVLVVIQDSNTAGLIANDGLDEWGT MAYKK  
HYAFAARMRLHMRTIDAIEVGVEMVPNKQKAEKIKTVKLDGDTRFRQLATEGVKEQMPVLHALNPD  
FAV-LPLLVT PAVGSVAADESVLGARVPVDASL-  
RELQKSQKGNALPISAIRLLDMRAARGMIDEDIMVAGKVAA-  
LLKISALETVIAVVL RNDSEAGIPWRLSVAERLEADTRRAGGYAARPFKSKPSLCETQAHAKIADAIQEIA  
ATYVAKEKRFVFPQEGIAIQIVLNSPHSRVDKDKRAGEGHLHEMAKELIAKAVIMIRNDPDTNSEGLLN  
YITTNQPTDLLFEDCLDVVIDMRMSV-----  
VHLNTV-  
HVVEGVRDVGNYEIMAAQAPSGLVQTERVDDRTGRERTIMW MYGAMEELWLLSIRYADWVTDC  
AIGAIILHVYAQQINRAFSRLRLQLNGWPPEASSWWNTWQLWLNKDGFFSYDAAFKAVKQVLKAAL  
ADFEMK DVEGVGRMLSRQEV RAGYRIRQQVDFARLDP RSDILLQAQTRLSVIRHALTVVAILILREVAS  
EFTLVVAMEDVAMGHVECVLADCFDFTAKDADIGPAGLRTPDPIFGDGTVLNEAVLGKIDLANTVAD  
FRYLMLVDGGRQLGVEWLT-  
NM LYDRIWVPPAQAALKNLTPICMFLSHPELDAATETRFAGISKARAEQLMAGALIEEILEGVARFAD  
PEATTHQSSKEKHFKYYGEQVDPVHLAYIAGNSALVATQVTVSDRLLKDRYVLNLRVFRGFTSLLWM  
AAQLAEKGPSATVITVGT VAGLGALVLFILL-----MRGYQAAKD VADADPEHFL-  
LASASRDVEWIEIVPAFFYYFATATSRL EKNTAVAREFFGLFKERLRVIDVLAVPPDRVEALVEFVALAGT  
LTSAEA-  
PGVIAFGLCEPNAAGVLEAERDWN LHRTMGITLAFFKAQVSVKGWFDKGLHKDVAQTGLREAGGFS  
FPFHAKVEAKRCVPV VHRVIDLGELEAGLIEIDSAVVVADEEQTLADQPTTRDNSVNAIGGVVLAGTM  
NMGASLDSVERAGNIIIELEEQQYSAVNGKKADGKMTNAILMVL S RAYFPVIARTASANALDKGVFNL  
LIQAPSDADNLDHG REMVIPAPTVHSETTPLYAESDIDKIAWIAPIHMLGTAAVLVFE PDHYSFISMM  
IDASLDITETA EVLDDYHVLEKGARPSAFRKILIRGLHIRLLAAVG TIIVVGSAGRDEV TAYIQGQAVPIT  
MRKATFLPAFAASSCKTIDIFSTMLRPPERS SIKMLILETVTEL-  
LEVTRGENDKLERILILLPGLDLAVIMGLVAAAKDFAQIVTVDAAITAILSVA AEAVVLR EMLLT KAEIAV  
TALALAMALLMLTADKGLTQKEQAREKQMKELIQGGVVLQIRASDAIVLAATADKVRLSTDEGTTSA  
FASLNLATVSDGFYVMSSAVLQLSSDLMMIVEVSRVLADKETKNALVVRHPEQVKTQPTYAEGSPGM

VLQTLTECIPPLAIKPEEVELLWTLVAALWRVKAHLANAARPRLERVLVLILALGLIVVLLQSEGGGMGG  
GAVGAAAKVLAAFSILTIKATVEDEVKVRTRRVMDLNSRLGRPEEAVAPEFRGEELEQNKYEAENVEV  
DCMETVRRFVDIPFLVSTRTQHNESEDGRSMVLDVTRVRFIDL-  
VTKRSEIILVERAETNGIARQMAKDLQALHEEAAAALGKVASLQHFISLNDGHISNYVTAQVNSVLGML  
LLVLFIQQVRVSKVWPTRREVMTMFILAAALAVFFIVIGLYINLVFMVGGISPLQITTLVLGEGVMAVRQ  
VSTFPAES-VTILQNTYADLICAGRVTKADIEKSLHIVVGARVARGTWYVIYHYEI-  
QAQGPAGIMQRAFRQATLSKSLIDGRMEVKVKVVTSDRYA-  
THEIKGGQHRKGRYNRVKVGHNIPVDLLARIKMAFAPPNLVLVKTFGAVVQKRFAQQLTHMRHGA  
VTIGPMEVSTPYIKAKKARHAPGDSVNIKPDNIVRSVAVVPELIWARENEDQSAVHDKYTKVTHKIA  
AKRNRVADKAQYDKRNQVHLSFIGLAVKVLPEQAIVHATAGTLMATTSEAVTENLKGVAATIRLDPM  
EKALIAIYKMRPQLNLAGKTDKKIVKCLNNNLDDVEYGKLGRRKIKPITIKSVYDVEHERATELVKLMP  
YKDDVEGRKSQFAEK--  
ALFEPLSAFMMMFGFIARAVYALYLRVIRRTIVLVKTKIVVNAATVLSAIVGVVSIRLRHKSTNVAETKH  
HIKTIEARARMTLAGSPSVKLHLESEGRVGTGGRIKGYMPYKNYNIFDKLSSGRRAKVKELAKKKVDK  
SISVDGIRTRQQGGRIKADLSNALANTRVGVDIVGENEQAASNPRANAEMGQIFAAIDARVYHHV  
GALIGHALAAVLAICAIQGIGKAHALLAVKLEINAGIEFHSA-VAIAVAAA-YAQQAGEA-  
ILADVSEPNLKALAVTEASVDVIR--RRKLG-  
LKKTKKEAYMSLTCFAGKGDRVKIVEASQTQAFEIVATRTAERHGIKAKGTYGKERAMMQIVPTKPVK  
VWVPVFVAEDELAPIRAFETNGDGVSVVKLAKDIKVTMFEKGVASLAVTGKATTVVYTVLEKVTQL  
MKDIIYEQRSAHYGRGRLRSHVVTHTKSKRHLMMRRTVVADPRMDAARLTDGEVSVITGATMAF  
VMSEQDAV--  
GDVDMHFHEEPQREAQLGIAGPETFLATEQPRLLALLFLRAYLIHIVDIETQGGFADAATIYDILRAMQ  
AKLDRKLSADIATRMCLHDDLADMVGTQVAARRESAGDTILSAFWINGVTANADIILLVANLECKTV  
PENIDCAIRLFYQRVTLQARERGGDVSVELVKAQNQIEAAEGTVIYTIKGTKPSTTQMALVVESISRSIV  
KSLAVQLFQVEHFLNDTWIATLLRAAAEVVYVDARGGDEAVDHVVERDTELEFAPQKDIVARKIRIYT  
PAAPSAVVIWDPAIEREEKADAQGTILMIYGPDLQDISCFTDIGAEAKIESLKSWEKEKYVVHRDDIPE  
DISTLVGKSSKVNKEFGIPDVAVCAPAKPGVTESIDRGEPKAGSCNEVANLPYPQESLVNVRSSANVQ  
KNISMVLGGNPVGEMGISREIERHLETNMCEIFVDKDDVDVALDFYRIALTALRVGLDPPNAKVEIDGK  
ESRKLIAVLDGDADLQRHPKLSEESGALRKADTKARLPDDTLIYDGVQHGDTAFTATDLPEGRV-  
VTPVNNTVKAQLKIDKVMVRTFHVVTLVSFSSSKGEDHLIKLRLNALKKSTRHYEMLLKIRDTECATSPH  
AISVGKILKVDSLLQTICVAHYTEIPLMAEDLTALGVMGDQGLLHVVPRLMILAVLHLYGLEAAMQVP  
RWSLQEKAIVTDLTMGLPVRDRAWSF-CISEVVGNTFFARTKDDDEQRLHARNPI-VLL-  
YGKTGMV-  
ISPSGLRLDSTAVADMDRNNKDQLILSKERLQDAMGYVYLKILLVFVDLVILAYGSGDLPMRFLVADQ  
AVTGRNNPQLVCLTRRTFPLDLQRDATFVMVFADATMKNLSHKKMHMNLVLIKSGWVVNVSTKIL  
ISDQAIASAEADAGAHTQPSESALAAITSRVMAPIVLVVSQKPTAPSKTLFLEALNLLDEVATVNLNPKP  
RYFVFEGDVVSVLATVDAAVLKGMQRPQPDRMRRAVVARAIGLAIAIQASGIIASLEADVINFRAVSL  
AAGVFDDMDLVPAATR-PALAFVRNHNKSTKRARPYKGHTKFLHKTDTDKALIAEGVDIA  
>GCA\_000152625  
AVIKPVSINVYAPVLMIRQTQVATVSGAGSPSLRAKTVYRKSGLGRKTMVKRVAEPIYF-  
GAMKMGKIVQLVSVISVDNRAVCTVAQVVEQEVVHGLVALEAVKRKIALDAIDGMTTEDPAKVAEFE  
EEIDLQKFRDADARADVLPVMLGLTLQVKFDPHEPVVHEIPVPVIFEVL-  
GIMAERGGIEVDECAISTEVSVDVPIAYVSPIDLAAVAGKEMAFIDQEAAVAAAARTAIALEELALEASILV  
VGIDPLLPV-LYADGDV-MSFANRSRVLESIVDLAVLIVQQSRAR--AGIAAEM-

MTERQAEALAEKRGTAEEIRIVKRMQKSAGLADDPELVIMEDAAEGNSSWAGQIYDDPISGSSESDSA  
GNIVVAANKRQNFARSITYLRKVEISDKASAPLMRGVKHNSKRSARKLDDAIAGLNFNPVPEGIAIAA  
AAGKPEDTLLHDATEAEVILLIVRWKVTWKTAIHALLFLAGNIVGLIQLGGIAAVGKPDGLLRHHKL  
NGSLIEQRRIVEKLTLRRAALKQKLGKEQVIIFVVKVQGDLVADAKVQMG-  
GPLGAVVAVQGD LIFVRRHRQTLITDQEATV-ILKGVAEGPADAQALLRIRVTHTLVKLSVLLIPE-  
PVLVDAVAIREGVGKSLQIIQLDVYLLRDMGTGSETLAESASRELIREVLMIDPVTGVRLAYGKVQERIG  
RKLGLKELQTLF--  
LAILEDVTEPRMENLPEGVCRNFVEAGPRAAVGMLFLLLDEAGRLYELDGDRELTKGIKSLIGLVDAKA  
PKVLSASYATARKIRYADCEVLEAEADLYAYKEERKELLRMVPVYIINAAKRRQLVIFALSLRGGHRRRA  
MAAIGVLIAALIESQARRDDVHHATPHVLLDDAEIVGTAIMISRQAAL ELKQVARIDIIVFPEFQEKM  
VVSLKFFCTEVAIFVIALITTVGEMLSREPEHAQEDGAGFQK----HSALFALSVTFERTNLKDA--  
PDLFSLGLASPRYGIIYVTQPKKKQMPTEPKERV DGF DLVHAVKADGRS-  
QEL EMPEAMALAVEADATINLSGGVLALKGGMTAVEKVDSKRKMSLAAEKWNIARLNAEDIHISGAA  
QFRCTS-IEQADLSAALGVKDLK-  
LYLRGASNAELEEANLDGAGASTADAAEDRQTSILLVSPVLVVIQDSNTAGLVSNNGGVEEWGTMAYK  
KH YAFARMRLHMTID-----EMEPNKQKSEKVKT VKLEGDTRFRQLSIGGVKEQMP-  
LHALNPDFAVLVPLLVT PAVGQVAAD EAVLGADVPCPFSL-  
RELQKSMRGAALPITAIKLLAMRAARAMIDEDIMVAGKVAA-  
LLKVGALETVIAVVL RNDSEATLPWRLSVAERLEADTKRASGFASRPFMSKPSLCDIQAHANVADPIETI  
AAGYVAKDQRFVFPVEGLAIRLILSSPHSRVGEAKRAGEGHLHAMAKELHAKAVMMLKNAPGTNKE  
GLLNYMTTRQPTNLLFEDCLDVVIDLRMSVVL SADLCECLILLILLNIKQIISPLVITKQGAASLNTVVVE  
SLVHLNTV-  
HVVVKG VREVGDYEIMAAAAPSGLVQVEQVDDRTGRERTIMW MYGAMEELWLMSLR YADWVQD  
CAIGAIILHVYAQTINRAFSLKRLQLNGWPKEADRWWNTWQLWLNKDGFFGYEAAFRAALQVLKSA  
LFDYEMS NIEGVGRYQSRQQLRVGYRIRQQVEFARLNPRTDILLQAQTRLSIIRHALTVVAILLRDVVG  
EFSLVVAQEDVAMGHVECVLADCFEFTEKNAHIGPVGLRTPETILGDGTVLSEAVLGKIDLANTIADFR  
YLVIVDGGRALGVWWISLENMLVGRIWLPPAQAALKDLQPICFFLSHPNLDLTL-  
DPLFEGISKARA EKLMAGALIEEILETVARFADPEATTHQTHKERHFKYYGEEVDPVHLAYILELFALVAT  
QVVISDRLLKDRYVLNLKVFTFTALLWLGLGLAHKGPAATVITVGTIAGLGALILFIILL-  
RDSVLLETLFHRYVY--MRGYSAAKDVADADPEHLLALAAVSRDVEWVEIIPAFFYYFDTAT-  
FEPFNTAEAKEFFGLFEERLRVVDVLAVPPLRVEELEE FVALAGTLPTSADALPGVIAVGLCEPNAASVLE  
ADQDWNLHRSMGITLAFYKAQESVHGWF DKG LHK EVAATGLRDAGGFTTHNLCEVEAKKCVPAVH  
RALDLGEIEASLIEIDSAVVVADEEQTLADTPTRDKAVGAVGGVVL AGTMNMGASLDQVERGNIII  
ELEEEQYSAVNGKKADGKLTDAVLMVISLSYFPVIAGLASANALDRGVFDLLIQAPADADNLDHGRNL  
TIPVPTIHTETAPLYAEADIDRIAWIAPLHMLGTLP AVL-  
FEPDQYSFISMMIDASLEITETA EVAEDYHVLEKGARPSAFRVILIKGLHIRHLAAVG TILVVG SAGREEIT  
AYIQDRAVPITLSKVTF LPAFAPSSCKVVDIFSTMLRPPERSTVQTLILETVTEL-  
LEVTRGSNDKLERLKM LPLGLDAAELLQLRAKAADFSAIVTIEASITAILSVA AEAVVLR ELLTKAEIAITA  
LALALALLMLTPDRGLTQKEIARDGQLKALIQGGAVLQVHAADAMVLAATADKVRLDTDEGTTSF  
ASLNLATVSDGFYVLSSAVLQMSSDLMMVVAVARVLADKETKNALVVRHPEQVK TQPTYAEGSPG  
MVLQTLTTAIPPLAIKP EEEVLLWTLVAALWRVKAHLAEAQRP RNERVLILLVTALIVVLLQSEGGGM  
GGG-VGSAAKVLGGLSILT IKASVADEV RKVTRRVMDLNSRLGRPEETVNPEFRGEELEQAK-----  
-----DVTRVRFIDL-  
VTKRSEIILAARAETDGIISREMAKDLQALQPEAAALGKIAALEHFIALNDGHISNYVTADIH SVLGM LLL

VLFIQQVRVAKVWVPTREVTMVFIMATLAIFFLVIGLSVKLVFMLGGISPLQITTLVLGEGVMVVRQV  
STFPAES-  
VTILQNTYADLICAGRVTKADIEASLHIVVGARVARGTWYVIYHYEITQAQGEAGIMQRAFRQATLSQ  
SLIDGRIEVKVKVVTSDRYA-  
TYEIKAGQHRKGTRFNVRVKMGHNIPVDLLARIKMAFGDPNLILVKTFGAVVQKRFAQPLTHVRHGAV  
TIGPMEVASPYITMKKARHAPGDSVVDIKPDNIVRSVAVPELIWARENEDQSAVHEKYVKTTHKIAA  
KRNTAVDKAQYDKRNQVHLSFIGLAVKVLDPDQAIVHATSGTLLPTESVAVTENLKGVAATIRLDPM EK  
ALIAYIKMRPQLNLGKNDQKIVKCLNNNLLDDVEYGKLGRRALKPLTIKSVYDVEHKRATLVKLIPYK  
DDVEGRKSQFADK--ALFEPLKAFMMLFGFIARAVYALSLRVVRRTILLAKTKVVVNANTILS-  
IKIIGVSIRLRHKTTNVADTNHHIKTIEARARMTLAGTPSVKLNLRPGKVGMMKAGRIKGYMPYKNFNIFD  
KLESGRRRAKVKDLAKLKKVDKTITVEGIRTRQQGGRLPKADLSNAFANTRVGV DIVGENEQEESNPRA  
NAEMGQVFGAIDARVYSHVGALIGHALTAILAICAILGIGRAHALLAV-LKINAGIEFHSA-  
VERAVAAA-YAQPAGEAAAIAADVSEADLGLDSLSEQSTDVCRMRRRQLG-  
LKKTKKDAYMSLTCTGTGKGDKVKIIEASQTQAYEIVATRTAERHGIIKAKGSFGKERAMMQITPTKPVKV  
WVPVFVAEDELAPIRAFATNGDGIDVVKLTDDIKVTMFEKAVASLAISGKSTTIVYTVLEKVTLSKDII  
YEQRAKAHYGRGRLRSHVVTHTKQKRHLSMMKRTVVASPKMDAARLHDGEVTVVTGATMAFVMS  
EQDAV--  
GDVDLHYHEEPRIEAEELGIAGPETFLATEQPRVLALVFLRAYLIHLVDIGTVGGFADAATYDILRAMQN  
KLDRKLSAEIAKVRMCLHDDVAGMGVRAEAPRREAAGDSILSAYWINGVTANADIIMLVANLECKAV  
PENIDCAVRLFYQRVTLQAKERGGDVRVALVPAQNQIEAAEGTVIYEIKGKTPGTAQWKLNVEAISRSI  
VKSLAVQLFQVEHFVQDTWIDTLLRAAQGVVYDAKEGREAVDFVVERDTELELAPQKDIVRRKIRIYT  
PAAPSAVVIWDPAIERADKADAQGTILKIYGPDLQDISCFTDIGAEPKIESLKSWEKERYVVHRDDIPP  
DI-  
VMVGKSSKVNKEFGIPDVAVCAPAKPGVTESIDRGEPAKAGTCGEVANMPYPQESLVNVRVSSANVQK  
NISMVLGGHPVGEMGISRKVERHLETNMCQILVDKADVDVALDFYKLQLTPLRVGLDRPNKAVQIDG  
KESRKLMAVLDGEADLQRHPKLSEAGGTG-TAGQKARLPDDALIFDGV LHGDIFTATDLPEGRV-  
VTPVANNVKAQLDIDKVLKTFHVVTLFSSSDKGEENLIKLRNLNALKKSTRHYEMLLKIRDTECAQSPH  
AIPVGKILKIDLLQTICQAHYTEIEPLLADDTALGVLGDQGLLHVVPRLMILAVLLGWELAAEALLPE  
WDL SARAILTNQTMGLGVR SRAWSY-AISEVVGNTFFARTKDDDTEDRLHARNPI-VLL-  
YGKMGMV-  
ISPSGLRLASTAEDAQQHGNESKLILSAERLQDAMEYFVLRVLLVFVDEVILAYGSGDEPLKFLVAEQA  
VTGRANPSLVCLTRRTFPLDLQRHIVFVLVFEDSTMKNLSHRKMHMNLVLIKSGWVNVNSTKILISD  
QAIASYAEDAGAHTQPSALAVITSRVIAPVLVVSQKPVAPSKTLFLEALNLLDEV TATV LNRPKRYI  
FEGDVISVLGGVDAAVILGMQRPQPDRMRRRAVVAEAI RLAI AARGSGVLAMLEAGHINFSRAVSFIA-  
AY-----DFRVRNHKTSTKRDRPYKAHPKVLHKAEDAKSLIAEGVDTLA  
>GCA\_000152645  
AVIKPVIQNEYAPVLMIAQTQVATVSGAGSPSLRAKTVYAKSALSRTMTKWVAAPIYY-  
GVLKMG NIVQLVSISVDNRSVCTVAQLVEQEVVHGLVALAAVKRKIALDEIDGMTTEDPAKVAQFE  
EELDLKRFRDADDRADMLPVMLGLTLKIKFDPHQPVVHDLPIPVIFEV-  
GVMADRGGIEVDELAISQSISDVPIEYVSPIDLA AVAGDAMAFIDQEA AVAAARETIALEELALEASIL  
VVGIKPLLLPV-FGDAADV-MSFANRSRTLGSIVNLAVAFPEIKRA----AFAADM-  
MRAAQAEALAEKRGTAEEIRIVKRMQRSAGLADDPDLVILEDAAEGNSNWAGQIYDDPISGSSES DS  
AGNIVF-  
ANKRQNFQRSITFLRKVEISDKAAAPLMRGVKHNSKSRASRKVDDAIATLNFPNVPEGIAIAAAAAGRP

ADTLLHDATEREEILLIVRWHVTWKTAIVILLVEAGDIVGLITL-----  
LNRHHKLNGSLIEQKPIIEKMTLRLRASLKQKLGKDQVIFVVKVQGD LVADATVQM-  
GGPLGAVVAVQGEVIFVRRHKQTVIGDQETTVEVLKGVAQGPADAEALLRIRVSHTLVKISVLLIPQ-  
PVLVDVAVSIREGVGKALQIIQLDVYLLRDMGTGEETLAESVSRETIRDLAVDPITGVRLAYGDLKERLA  
KKLVLDKLET----  
LSIMADVTEPRMQDLPAGVRRFTITAAPRAAVGMIFLVLD DAGKIYPIDGDLRELQKSVKSLIGLVDAK  
VPKVLSAGYATQRLKIRFADCEVLNAEADLYAYKEERKELRMVPVYIILEAKRRQLIVFLLSLRGGHRRRA  
MAAIGVMLAAAILESQA EKDPVNHAQPAILLDDAEVVGTAIMVSRQAALQVKDRSKVDVIVVFPEFQ  
EKMVVS LKFFCTEVAIFVIALITTVGEMLSREPEHAQEDGAGFGKRIRDHSM LFALRVVFERTNLRSDAT  
PDLFLGMGLAPPRYGILYTNQPKKKQMPTEPDSDR TDGFELVHAVKEDSASNHELEMPEAMALAVE-  
DAPINVSGGVLAMTGGMVAVEKVDSKRKMSLAATKWTISKVPMLDIHLSAASQFRCLE-  
IELADLSASLGLKAD--  
LFLPGASNEELEEDKLNGAGASTADVAADRQGSILLVIPVLVVIQDSNTAGLIANDGLDEWGTMAYKK  
HYAFAARMRLHMRTIDAIEVGVEMV PNKQKAEIKTVKLDGDTRFRQLATEGVKEQMPVLHALNPD  
FAV-LPLLVT PAVGSVAADESVLGARVPVDASL-  
RELQKSQKGNALPISAIRLLDMRAARGMIDEDIMVAGKVAA-  
LLKISALETVIAVVLRNDSEAGIPWRLSVAERLEADTRRAGGYAARPFKSKPSLCETQAHAKIADAIQEIA  
ATYVAKEKRFVFPQEGIAIQIVLNSPHSRVDKDKRAGEGHLHEMAKELIAKAVIMIRNDPDTNSEGLLN  
YITTNQPTDLLFEDCLDVVIDMRRMSV-----  
VHLNTV-  
HVVVEGVRDVGNYEIMAAQAPSGLVQTERVDDRTGRERTIMW MYGAMEELWLLSIRYADWVTDC  
AIGAIILHVYAQQINRAFSLRRLQLD GWPPEASSWWNTWQLWLNKDGFFSYDAAFKA VKQVLKAAL  
ADFEMK DVEGVGRMLSRQEV RAGYRIRQQVDFARLDPRSDILLQAQTRLSVIRHALTVVAILILREVAS  
EFTLVVAMEDVAMGHVECVLADCFDFTAKDADIGPAGLRTPDPIFGDGTVLNEAVLGKIDLANTVAD  
FRYMLLV DGGRQLGV EWLTL-NMLYDRIWVPPAQAALKNLTPICMFLSHPELRLSGTSKSKFL-  
ISKARAEQLMAGALIEEILEGVARFADPEATTHQSSKEKHF KYEYGEQVDPVHLAYILDMFALVATQVTV  
SDRLLKDRYVLNLRVFRGFTSLLWMAAQ LAEKGPSATVITVGT VAGLGALVLF IILL-  
RDAVLVETLFFRYVY--MRGYQAAKD VADADPEHFL-  
LASASRDVEWIEIVPAFFYYFATATSRLTKNTAVAREFFGLFKERLRVIDVLAVPPDRVEALVEFVALAGT  
LTTSAEA-  
PGVIAFGLCEPNAAGVLEAERDWN LHRTMGITLAFFKAQVSVKGWFDKGLHKEVAQTGLREAGGFS  
SPFHAGKEAKRCVPV VHRVIDLGELEAGLIEIDS AVVVADEEQTLADQPTTRDNSVNAIGGVVLAGTM  
NMGTS LDSVERAGNIIIEEQQYSAVNGKKADGKMTNAILMVLSRAYFPVIARTASANALVKGVFNL  
LIQAPSDADNLDHG REMVIPAPTVHAETTPLYAESDIDKIAWIAPIHMLGTLAAVLVFE PDHYSFISMM  
IDASLDITETA EVLDDYH VLEKGARPSAFRKILIRGLHIRLLAAVGTIIVVGSAGRDEVTAYIQGQAVPIT  
MRKATFLPAFAASSCKTIDIFSTMLRPPERSIKMLILETVTEL-  
LEVTRGENDKLERILILLPGLDLAVIMGLVAAAKDFAQIVTVDAAITAILSVAAEAVVLR EMLLTKA EIAV  
TALALAMALLMLTADKGLTQKEHAREKQMKELIQGGVVLQIRASDAIVLAATADKVRLSTDEGT TSA  
FASLNLATVSDGFYVMSSAVLQLSSDLMMIVEVSRVLADKETKNALVVRHPEQVK TQPTYAEGSPGM  
VLQTLTECIPPLAIKPEEV ELLWTLVAALWRVKAHLANAARPRRERVVLILALGLIVVLLQSEGGGMGG  
GAVGAAAKVLA AFSILT IKATVEDEV RKVTRRVMDLNSRLGRPEEAVTPEFRGEELEQNKYEAENVEVD  
CMETVRRFVDIPFLVSTR TQHNESEDRGSRMVLDVTRVRFIDL-  
VTKRSEIILVERAETNGIARQMAKDLQALHEEAAA LGKVASLQH FISLNDGHISNYVTAQVNSVLGML  
LLVLFIQQVRVSKVWWPTRREVTMV FILAALAVFFIVIGLYINLVFMVGGISPLQITTLVLGEGVMAVRQ

VSTFPAES-VTILQNTYADLICAGRVTKADIEKSLHIVVGARVARGTWYVIYHYEI-  
QAQGPAGIMQRAFRQATLSKSLIDGRMEVKVKVVTSDRYA-  
THEIKGGQHRKGRYNRVKVGHNIPVDLLARIKMAFAPPNLVLVKTFGAVVQKRFAQQLTHMRHGA  
VTIGPMEVSTPYIKAKKARHAPGDSVNVNIKPDNIVRSVAVVPELIWARENEDQSAVHDKYTKVTHKIA  
AKRNRVADKAQYDKRNQVHLSFIGLAVKVLPEQAIVHATAGTLMATTSEAVTENLKGVAATIRLDPM  
EKALIAIYIKMRPQLNLAGKTDKKIVKCLNNNLDDVEYGKLGRRKIKPITIKSVYDVEHERATELVKLMP  
YKDDVEGRKSQFAEK--ALFEPL-----  
AIKIVGVSIRLRHKSTNVAETKHHIKTIEARARMTLAGSPSVKLHLSEGRVGTGGRIKGYMPYKNYNIF  
DKLSSGRRRAKVKEAKLKKVDKISVDGIRTRQQGGRIKADLSNALANTRVGVDIVGENEQAASNPR  
ANAEMGQIFAIDARVYHHVGALIGHALAAVLAICAIQGIGKAHALLAVKLEINAGIEFHSA-  
VAVAVAAA-YAQQAGEA-ILADVSEPNLKALAVTEASVDVIR--RRKLG-  
LKKTKEAYMSLTCFAGKGDRVKIVEASQTQAFEIVATRTAERHGIKAKGTYGKERAMMQIVPTKPVK  
VWVPVFAEDELAPIRAFETNGDGVSVVKLAKDIKVTMFEKGVASLAVTGKATTVVYTVLEKVTQL  
MKDIIYEQRSAHYGRGRLRSHVVTHTKSKRHLSMMRRTVVADPRMDAARLTDGEVSVITGATMAF  
VMSEQDAV--  
GDVDMHFHEEPQREAQLGIAGPETFLATEQPRLLALLFLRAYLIHIVDIETQGGFADAATIIDILRAMQ  
AKLDRKLSADIATRMCLHDDLAEMGVTQMAARRESAGDTILSAFWINGVTANADIILLVANLECKT  
VPENIDCAIRLFYQVRVTLQARERGGDVSVLVKAQNQIEAAEGTVIYTIKGTPTTQMALVVESISR  
VKSLAVQLFQVEHFLNDTWIATLLRAAAEVVYVDARGGDEAVDHVVERDTELEFAPQKDIVARKIRIY  
TPAAPSAVVIWDPAIEREEKADAQGTILMIYGPDLQDISCFTDIGAEAKIESLKSWEDEKEYVVRDDIP  
EDISTLVGKSSKNKEFGIPDVAVCAPAKPGVTESIDRGEKAGSCNEVANLPYPQESLVNRVSSANV  
QKNISMVLGGNPVGEMGISREIERHLETNMCEIFVDKDDVDVALDFYRIALTALRVGLDPPNAKVEID  
GKESRKLIAVLGDADLQRHPKLSEESGALRKADTKARLPDDTLIYDGVQHGDTAFTATDLPEGRV-  
VTPVNNTVKAQLKIDKVMVTRTFHVVTLSFSSSKGEDHLIKRLNALKKSTRHYEMLLKIRDTECATSPH  
AISVGKILKVDSLLQTICVAHYTEIPLMADDLTALGVMGDQGLLHVPRMLAVLHLYGLEAAMQV  
PMWSLQEKAIVTDLTMGLPARDRAWSF-CISEVVGNTFFARTKDDDTEQRLHARNPI-VLL-  
YGKTGMV-  
ISPSGLRLDSTAVADMDRNNKDQLILSKERLQDAMGYVVKILLVFVDLVILAYGSGDTPMRFLVADQ  
AVTGRNNPQLVCLTRRTFPLDLQRDATFVMVFADATMKNLSHKKMHMNLVLIKSGWVVNVSTKIL  
ISDQAIASAYEDAGAHTQPSALAAITSRVMAPIVLVVSQKPTAPSKTLFLEALNLLDEVTATVLNPKP  
RYFVFEGDVVSVLATVDAAVLKGMQRPQPDMMRRAVVARAIGLAIAIQASGIIASLEADVINFSAISL  
AAGVFDDMDLVPQAATQ-PALAFVRVNHKVSTKRARPYKGHTKFLHKTDTDKALIAEGVDTIA  
>GCA\_000152725  
AVIKPVSLDKYAPVLMIRQQEVATVSGAGSPSLRAKTVYRKSGLQKISTKWVAKPLY-  
GVLKMGDIVQLVSISVDARSVCTVAQVVEQEVVHGLVALEAVKRKIALDEISGMTTEDPAKVAEFEE  
EVDLKKWRDADQRADLLPIMLGLTLKIRFDPEPVSDLPVPVIFEVL-  
GIMAERGGIEVDECAISNAVSDVDPVAYVSPIDLVDVAGAQMIDYDQEA AVAAAKEAIALEELALEST  
VLVVGI-PLLIPV-FGEEGNN-MSFANRSRALGTIVDLAVSFEEITRARI-EGFASSL-  
MRDLQAAAALSEKRGTAEEIRIVKRMQKAAGLADDPDLVILEDAAEAGNAQWAGQIYDDPISGSSES  
AGNIVHAANKRQMTTSITFLRKVEISDKAAAPLMRGVKHNAKSRSARKLDDAIAALNFPNVPEGIAI  
RAEAGRPADTLLHDATEGEEILMLIIRLKVTWKTAIIVGLFA-  
AGDIVGLITLGGIAAVGKPDGLLNRHHKMNASLIEQRPIVEKLTCLKLRASVQQLGAENIIIFVVRVKGD  
LVADAKVQM-GGLVGAVVAVQGDLIYVRRHRQTLVTDQESTV-  
VLRGVAEGPADAEALLRIRVSHTLVEMTVLLIPG-



PVLVDSVSIREGVGKSLQIIQLDVYLLRDMGTGEETLAESRSRETIREILMIDPITGVRLAFGTVKERMGK  
KLGLKDLDTLF--  
IAILRHVTEPRTENLPAGVHRTFVEAGPRAAVGQLFLVLDDGGRLMPIDGELRELPKSVKALIGLLDSKA  
PKVLSAGYATARLRIRYADCEVLESEADLYAYKEERRELLRMVPVYIITDAKRRQLIIFALSLRGGHRRAM  
ASIGVMLAAAILESQAEGKSVHHAEPRIILLTDAEIVGSSMMISRQASLEIKEFTKIDVVVFPDFQEKMV  
VSLRFFCTEVAIFVIALIVTVGEMLSREPEHAQEGGAGFARRIRGHSMLFALAAVFDRSNLDTSRLPGLF  
LDLGLAPPKYGILYTNQPKKKQMPNEPEGEKVDFELVHAIKEDQVSNHELEMPEAMALALE-  
DATINLSGGVLALKGDMAAIERIDSKRKLSLAVEQWNISKLDAADVLMGAAPVRCAG-  
IESASISAALQSKDL--  
LYLLGASNAEELSRDLGAGNSTVAVTEERQPLILLIYPVLVVIQDSNAAGLISNGGLEEWGTMAYKKH  
YAFAARMRLHMRTEIAVELGVALEPNKQKSEKVKTVKLEGDTFRQLAVEGVKEQMP-  
LHALNPDAFV-VPVLVTPAVGLVAADESVLGARVPCAFSL-  
RELQKSQKGSALPISAVRILPMRQARAMIDEDIMVAGKIAA-  
LFKITALETILALVLRNDSEAALPWRLSVAERLEADTRRAGGYAARPFMSKPSLCDTQAHANVAEPIETI  
AAGYVAAEERFVFPVEGIPIQIVLASPHSRVGTAKRAGEGHLHEMAKELLAKAVLMVKHEPDNTTEGL  
LTYLTNNQPTDLLFEECLDIIIDLRRMSVV-----  
VHLNTV-  
HVVEGVRAVGQYEIMSAAADSGLVQVERVDERTGRERTRMWMYGAMEELWTMSVTFADWVPD  
TPIGAIILHVYAQEINRAFSHLRLQLDGWPEATRWWNTWQLWLNKDGFFGYAAAFRALCQILKDAL  
HDYEMSDVEGVGRYQSRQELRVGYRIRDCVEYSQLDPRTDILLQAQTRLSVIRHALTVVAILVLRDVV  
GEFSLVAMEDVAMGHVECVLADSFSTAKNADIGPVGLRTPETILGDGTVFREAVLGKVDLANTVA  
EFRYLVLVDGGRALGVRWVEMRNMLYARIWLPPAQAALKNLLPICFFLGHNQLNLEIFDSL FAGISKA  
RADQLMASVLVEEILEAVAAFAQPEATTHQSNKERHFKYYGEEVDPVHLAYILPIFALVATQVVVSDRL  
LKDRYVLNLRV-RGLTSLLWLALQLSDKGPAATVISVGTIAGLGALVIFIILL-RDSVLIETLYRYVY--  
MRGYSAAKDVADADPEHLLALAAASRDVEWIEIIPAFFYYFDTAKSRYGVNTAVAREFFGIFEDRLRVIE  
VLVVPDRVLELVEFVAVAGTLPTSATALPGTIASGLCEPNAAA VLEADQDWNLHRSMGITLAFYKAQ  
ESVKGWFDKGLHKGVAEISLEEAGGVTVHNRCEVDARQCIPALHRVLDMGELEGALIEIDSAVTVSEE  
EQSLADKPTTREKTVGAVGGVVLGTMNMGSNLDSVERNNGNIIIEEEEQYSAVNGKKADGKLTDKV  
LMVISLAYFPVLRAQASASAMDRGVFDLLIEAPDDATNSDHGKTLSPAAITIHGETAPLYAEAEIDRIA  
WIAPLHLLGTLPAVL-  
FEPDHYSFISMMIDASLEITETAEVLDYHVLEKGARPPAFRTILIRGLQIKLLAAIGAIIVGSAGRDEVT  
AYIQGRAVPITLRKNTFLPAFAPSSCKAVDIFSTMLRPPERSTVQMLILETV AEL-  
LEVTRIENDKLERLLVLLPGLDLAELAALAAAQDFAQIVTIDRAVTAISVAAEAVVRELLLTAEIAIT  
ALAMGLALLMLTADGGLTQKERAREAQLRDLIQGGAVLQVHASDDMVLAATADKVRNLNTDEGTT  
SAFASLNLATVSDGFYVMSSAVLQLSADLMMIVTVARVLADKEEKNALVVRHPEQVKTPQTYAEGSP  
GMVLQTLTGCIPLAIKPEEVELLWTLVAALWRTKAHLAEAMRPRRERVILFLALALIVVLLQSEGGG  
MGGG-  
MGAAAKILAAFSILTIKASVGDEVKVTTRRVMDLNSRLGRPEEQVNPEFRGEELEQTKYEAENVEVDCI  
ETIRRFVDIPFLVSTRTQHNESEDGARMVLDVTRVRFIDL-  
VTKRSEIILAAARAETDGIIAREMAAEMQSLHPEAAAALGKIAALEHFIALQDAHISNYVTADIHSVLGMLL  
LVLFINQTRISKITWPTTRREVTMVFIMAALAVFFLVIGLGLNIVFMLGGISPAQITTLILGEGVMAVRQVS  
TFPAES-  
VTILQNTYADLICAGRVTKADIEKSLHIVVGARVARGTWYVIYHYEISQAQGEAGIVQRAFRQATLSQS  
LIDGRMEVKVKVVTSDRYA-

TYEIKGGQHRKGTKYNRVKVGHNIPVEVLPRLKMAFGDPNLILVKTFGAVVQKRFAQPLTHMRHGAV  
TIGPMEVASPYIQQKKARHAPGDSVVDVKPDNIVRSVAVVPELIWARENEDNSAVHDKYVKTTHKLA  
AKRTTAVDKAQYDKRNQVHLSFIGLAVKVLDPDKAIVHATAGTLLPTEAVAVTEGLKGVAATIRLDPM  
KALIAYIKRMRPQLNLQGKTDKKIVKCLNNNLDDVEYGKLGRRIKPLTIKSIYDVEPKESTELVKLMPYK  
DDVEGRKSQFAEK--

ALFEPLKAFMMMFGFIARAVYALYLRVVRRTILLVKTIVVNASTILSAIKIIGVAIRLRHKTNNVADTKHH  
IKTIEARARMTLAGAPSVKLHLRPGRVGGKGGRIKGYMPYKNFNIFEGLSSGRRRAKVKDLAKLKKVDKEI  
TVDGVRTRQ-

GGRLPKADISNAFANTRVGVDIVGENEQUEESNPRANAEMGQIFAAIDARVYHLVAALIGHALEAILAL  
CRILGIGRAHVLLAVKLRLINAGIEFHSA--VETAVAAA-

YAPAGEAAAADISEAYLGDLMLTAASIDVCRVRRRQIA-

LKKTKEAYLKLTCFSGKGEKVKILECTQTQAYEIVATRTAERFGIKAKGTYGKERAMMQIVPTKPVKV  
WVPVFNEDPELLAPVRAFAETNGDGDVVKLTKDIKITMFEKAVASLAVAGKSTTVIYTVLEKVTLMK  
DIIYEQRAKAHYGRGRLRSHVVTHTKSRRHLSMMRRSVVADPHMEARLTDGEVSITGATMAFVM  
SEQDAV--

GDVRWHFHDEPRREAELGIAGPETFLATEQPRLMALLFLREYLIHIVEIESVGGFADAATYDILRAMQN  
KLDRKLAADIAKVRMCLHDNVADMGVKAEAPRRDAAGDAILSAYWINGVPANADIILLVANLDCDT  
VPENIHCAVRLFYQRVTLQAKERDGDVSVKLVPAQNQIEAAEGTVIYTIKGKEPGTVQMKLNVEGISR  
SIVKSLAVQLFQVDLFTNDTWIATLLRAAQDVVYVDASEGREAVDHVVERDTELEMAPQKDIVRRKIR  
IYTPAAPSAVVIWDPAIERENKADAQGTLKIYGPDLQDIACFTDIGAEPKIESLKSWEKEKYVVRDDI  
PEDI-

TLVGKSSKVNKEFGIPDVQVCAPAKPGVTESIDRGEPKAGSCGEVANLPYPQESLVNRVSSANVQKNI  
SMVLGGNPVGEMGISRGVERHLETNMCEIFVDRPEVDVAKDFYIIRLTPLRVGLDRPNAKVEVGGKES  
RKLMAVLDGAAALQRHPKVSEAGGTR-KAGAKAKLEEDALIVDGMHGDIKFTCTDLPEGRV-  
VTSVFNAVKAQLDIDKVLLKTFHVVTLSFSNDKGDEHLIKLRLNALKKSTRHYEMLLKIRDTECAASPHA  
IPVGKILKIDALLQTICKAHYTEIEPLLADDLTALGVMGDQGGLLHIVPRLMILAVLHLWGLDAACIVPHW  
GLSRRRAVITDQTMGLSVRERRWTF-AISEVVGNTFFAKTADDETEQRLHARNPI-VLL-YGKMGMV-  
ISPSGLRLDSTPPSSLGHGNEQQLILSTERLQDAMAYFVLRLLLVDHVLAYGSGEELRFLVADQAV  
TGRTNPGLVCLTRRTFPLDLQRHATFVLVFEDCTMKNLSHKKMHMNLVLIKSGWVVNVSTKILISDQ  
AIASAEDAGAHTQPSALAVITSRVIPIVLVISQKPTAPSKTMFLEALNLYDEITTTVLNAPKKYIFE  
GDVISVLGRIDAIVILGTQRPQPDMMRAAVAAAVRLAIALRASGIVAALDAGHINFSRAVSFAH--  
Y-----EFRVRNHKTSTKRDRPYKGHPKFLHKEDEEKNLIADGVDTIA

>GCA\_000152785

AVIRPVTMKTYAPVLMIAQSQVATVSGAGSPSLRAKTVYAKSGLQRKAETKWVVKDFYY-  
GVVKLGNLVQLVSISVDNRAVCTVAQLVEQEVEVVHGMVALDAVKKKIALEEITGMTAEDPAKVIDYA  
GELELRKFRDADDRADMLPILLGLTLKIRFDPHQPLVHDLPIPVIFEV-  
GIMVQRGTIEVDQCAISTAISDVDPVYVSPIDLATVSGDKMAYIDQEGAVSAAKADIAL--  
LALES AVL VVG I-PLLIPV-FAAHADV-MSFANRSRTLKTIVNLAVSYPTIKRA-IDG-IAAIL-  
MEASQAAALAEKRGTAEQIRIVKRMQRSAGLADDPDLVLLEDAAEGNSNWAGQIYDDPLSGSSES  
SAGNIVFAANKRQNFQRSITFLRKVEITDQAAAPLMRGVKHNAKSRSARKVDDAIAALNFPNVPEGIA  
IRAAAGSQIHLLHDATEGEEILMIIVRWHVTWKTAAIISLAVTAGDIVGLIALGGIGAVGRKDGLLRHH  
KMNGALIEQRRIEKLTLRLRAALKQKIGAEHIIIFVVKVAGDLVAKAKIQM---  
SVGAVVAIQGETIYVRRHRQTVAIEDATVEVLRGVAEGPADAQALLRIRVDHVVVKLSVLLIPE-  
PVLVESVSIREGVGKALQIIQLDVYLLRDMGTGEETLAKSRSREMIREILQVDPITGVRLAFGILRERLVKG

GSMKELGTLL--  
IAIIDKITEPRMANLPDGVCRFTINAGPRAAVGMIFLLDDAGKIYTIDGDLRELTKSIKSLIGLVDAAKPKI  
MSAAYA AAVRLQVRYADVTVLVSDADLYAYAEERRELLRMVPVYITNAAARRQLIIFALSRLGGHRRAR  
AAIGVLIAAAILESQALQGPVNHAPAVLLDDGEIVGSEMMISRQAALDLKQIIKTDVIVIFPEFQEKMV  
VSLKFFCTDVAIFVIALICTVGAMLSREPSSAQEDGAGFQKRIRAHSVLFALVATFDGRNLRSA---  
DLFLALGLAPPRYGVLYTEQPKRKQMPSEPDKDEVGDFDLVHAIKDDTASNHLQDMPPEAMALAVE-  
DATINVTAGVLAMTGDMAAMEKVDSKRKMALAVTKWTISAHAIVDVLISGAHPFRVLG-  
IEAADVSVGLPHKTIWFLPLPGANNAELEEDKLDGAGASTAEAAKDKQTGILLVNPVLVVIQDSNTAA  
LIANGGLEEWGTMAYKKHYALAARMRLNMRTID-----  
QMEPNKQKAEEKIKTVKLEGDTRFRQLATEGVKEQMP-LHALNPDAFV-  
LPVLVTPAVGRVAADEQVLGAEVPCDASL-  
RELQKSMGSDALPISGIRLLGMRAARAMVDEDIMVAGKVAA-  
LLVILALETITHLVLRNDSEATLPWRLSVAERLEADMKRASGYAARPFQSKPSLCNTQAHAKIADPIQEI  
AAGYVAKPDRFVFPVEGIPIQLILASPHSRVGAAKRAGLGHLEMAKELHAKAVIMVLNEPDTNTDGL  
LNYLTTQQPTDLLFEDCLDVIDMRRMSVV-----  
VQLNTV-  
HVLIPGVRDLGDREIMAAAAPSGLVQMERYDDRTGRERTLMWWMYGAMEELWLLSVTYADWVWDC  
AIGAILLHVYAQVINRAFSLDRLQLAGWPREANRWWNTWQLWLNKDGFFSYDAFRTLAVLSSDL  
DDYDMSDVEGVGRHLSRQQLRVGYRIREQVAFEQLDPRTDILLQSRTLSVIRHALAMVAILIVRDIVV  
EFTLVVAKEDVAMGHVECVLADSFDTAKDADIGPVGIRTPDPTVLGDGTVFNEAVLGKIDLAN TVADF  
RYKMLADGGRDLGVSWITLQNMLYARIWLPPAQAAKNLVPIAFFLGHTELNLLLAPALWSGISKARA  
QKLMAGALIEKILAKVAAFADPEATTHQSKKAPHFKYYGEEVDPVYLAYILQIFALVATQVTVSDRLLT  
DHYVLNLKI-RGFTSLLWLSAQIADKGPAAATVITVDTIMGLGALVLFILL-RASVLVETLYRYVY--  
MLGYQAAKDVADADPEHFSLAHASRDVEYIEIIPAFFYYFKTAT-  
FEPFNTALAREFFGLFEERLRIIEVLVPPDRVLELVQFVALAGTLATSAEA-  
PGVIACGFCEPNAAGVLEADQDWNLHRSMGITLAFYDARES VKGWFDKGLHKDVAATGLTEAGALT  
TPFHAGATAKQCVPAVHRVLDLGEVEAALIEIDSAVLVADEEQTLADKPTTRENSVGAVGGVVLGAT  
MAMGANLDSVERAGNIIIEEENYQAVNGKKS DGKITDKVLMVLSEAYFPVLRMASANALDKGRF  
GLLIDAPDDADNQDHGRSLTIPAPTVHSESAPLFAATEIERIAWIAPIHLLGTLTAVLGFEPDQYSFISM  
MIDASLNIMQTAEVL-DYHVLEKGSRPPSFRVILIKGLHIRLLAGICTIIVVGSAGRAEVTAYIQG-  
AVPITLNKKTFLPAFAASSCHADIFSTMLRPPERSTIMTLILETVTEL-  
LEVTRLENDKLERMETLLPGLDVAELLGLVAAAGDFTAIVTIDRAITAILSVAAEAVVREMLLTAEIAV  
TALALALALLMLTKDQGLHQKDHAREAQMKDLIQGGVVLQVKAERMMLASTADKVRLD TDDGT  
TSAFASLNLATVSDGFYVLSSSVLQMSSDLMMIIVARVLADKETKNALVVRHPEQVKTQSTYAE GSP  
GMVLQTLTGAIPLAIKPEAVELLWTLVAALWKVKAHLANAARPHQERV LILALSLITVLLQSEGGG  
MGGG--  
NPPAKMLAAFSILTIIKAGDEVKVTTRVMDLNSRLGRPEESVNPEFRGAELEQSKYEAENVEVDTM  
ETIRRFVDIPFLVSIRTQHNESEDRGARMVLDVTRTRFIDL-  
VTKKSEIILAARAETDGIIAREMGKDLAALHPQAAAALGKIAALQHFIQDAHISNYVTADIHAVLGMILL  
LVLFIQEVRVAKVWVPTREVTMVFI LAALAVFFLVIGLG VQIVFMLS GISWNA LTTIVLGE GIMVVRQT  
STFPEDS-  
IGILQNTFAELICSGRVAKADIENSLHIVVAGRVARGTWYVIYLYEISQAQGGQSGIMQRAFRQMTLSQS  
LIDGRMEVKIKVVTSDRYA-  
TYEIKGGQHRKGTRYNRVKVGHNIPVQVLARMKMAFTPPNLVLVKTFGAVVQKRFAQAL THIRHGA

VSIGPMEVSSPYIQNKARHAPGDAVVDLKPDNIVRSVAVVPELIWARENEDQGAVHDKYVKTTHKL  
AAKRKKAVDKAQYDHRNQVELSFIGLAVKVLPEQAIVHATSGQLMPTASVAVTEGMKGIAATIRLDP  
MEKALIAYIKRMRPQLNLAGKQDKKIVKCLNNLDDVEYGKLGRRKIKPLTIKSVYDVESRRATELVKL  
MPYKDDVESRKSQFAEK--  
ALFEPLKAFMMMFGFIARAVYALYLRVIRRTILLAKTKVVVNADSVLSAIIIGVSIRLRHKSTNVAETNH  
HIKTIEKRARMTLAGAGKVKLNLSPGKIGMKGGRIKGYMPYKNFNIFDGLASGRRRAKVQDLAKLKDVD  
KTIAVDGIKQKQGGRTPKAQLSNAI-  
NTRVGVDIVGENEQUEESNPRANAEMGQIFAAIDARVFSHVGALIGHALEAVLAVVAIWGIGRAHSL  
AVRLHINAGIEMHSAA-VPRAVAAA-  
FAQNAGEASLIADVSEGLGALAVTAMSVDVCRLRRRSLAELKTKKDAYMGLTCFSGKGDKVKIVEA  
TQTQAYEIVATRTAERHGIRAKGTYGKERAMMQILPTKPVKIWVPVVFVSEEELLAPIRAFAETQGDGVT  
VVKLTKDIKVTMFEKAVASLAVSGKATTVVYTVLEKVTELMKDIIYTQRAKAHYGRGRLRSHVTTTKQ  
RRHLSMIKRTVVADPSMEAARLTDGEVSVITGATMAFVMSEQEA--  
GDVDLHYHEEPRREVELGIGGPETFLTTEQPRLLAVLFLREYLLHIVEIGTTNGFSDAATIYDVLAMVYK  
LDRKLSADIKTRMVLVDDLMEGMVTEVAARREAAGDKILSSYWINGVTANADIVLLVANMECPCVP  
ENITCAIRLFYQRITLQAKERGGDVSVAVVAANKQIEAAEDTVIYTIKGTGTAQMKLTIEGISRSVVK  
FAVQLFQIDTFMDDTWIATWLRADDVVFVAAEDGKEAVDHVVERDTAVEFAPQKDIVSRKIRIYTP  
AAPSAVVIWDPDREDKAEAGTILKIYGNLQDINCFTDIGAEPKIESLKAWDEKEYVVRDDIPD  
DIDTLVGKSSKVNKEFAIPDVAVCAPSKPGVTESIDRGEPKAGTCGEVANMVYPQESLVNAVSSANV  
QKNISMVLAGHPVGEMGISREIERHLETNMCEIFVDKADVDVALDFYTLVLTILRVGLDPPNARVEVD  
GKESRKLMAIQDGAALQRHPKVSMATGTGLGAGVKARMPDDALILDGVVHGALSFTATDLPAGR  
V-  
VTPVFNTVKAQLKIDKVLKSFHVVTLSFSNNKGEEHLVKLRLNALKKNTRHYEMLLKIRETECAESPHA  
ISVGKVLKIDKLLQTICTAHYKEIEPLLADDLTALGVMGRQGLLHVVPRLMILAVLHLI-  
IECGMILPKWRLQQRAVITDQTMGLAVRARAWSY-AISEVVGNTFFARTKEDDTEQRIHARNPV-  
VLL-LGKFTMI-  
ISPSGLGLQSTPATDQDLGNTEPLILSPERLQDEMGGYVIAILLVFVDQVILAYGSGDEPIKFLVADQAV  
TGKQNPGMVTLTRRTFPLELQRDATFVMVFEDSTMKNLSHKKMHMNLVLIKSRGWLNVNSTKILISD  
QAIASYAEDAGAHTQPSALAAITSRVMPIVLVVSQKPIAPSKSLFLEALALYDAVTATVLNPKKRYF  
IFEGDVAVVLGHLDAVLLGMQRPQPDAMRRAIVAAAIRLAI AALASGIITRLEQGLINFSRAVSFTQ-  
AY-----  
>GCA\_000152845  
AVIKPVVMKEYAPVLMIKQTQVATVSGAGSPSLRAKTVYAKSGLQRTSTKRVAMNIYY-  
GVMKLGDIVQLVSISVDARAVCTVAQVVEQEVVHGLVALAAVKKKIALEAINGMTTEDPAKVSEFD  
EELDLRKFRDAEDRSDMLPVLLGLTLTIRFDPEPLVHDIPIPIYEVV-  
GIMADKGGIEVDDCAISTAVSDVDPLAYVSPIDLAAVAGEQMAFIDQEHASAAAREAIALEELAESSV  
LVVGIRPLLLPV-LGEDGDN-MSFANRSRELGSIVDLAVSAERLSRAR-EQGIASEM-  
MVRMQAEALAERRGTAEEIRIVKRMSRSAGLADDPELVLLGDAAEGNSSWAGQIYDDPISGSSQSDS  
AGNIVVAANKRQNFARSITFIRKVEISDQATAPLMRGVKHNSKRSARKVDDAIAALNFPNVPEGIAIR  
AEGDKSADTLLHDATETEEILLVVRWKVTWKTAIHALLVEAGNVVGIELGGVAAVGRPEGLLRHHK  
LNGSLIEQRPIIEKTLRLRASLKQKLGAEQVIFVVKVSGDLVADAKVQMG-  
GPIGAVVAVQGDVIFVRRHRQTLVTDSEATV-ILKGVAEGPADAEALLRIRVSHTLVALSILLIPQ-  
PVLVDSVSIREGVGKALQIIQLDVYLLRDMGTGSETLAESSSRELIREVL MIDPVTGVRLAYGEIKERMKG  
KVGLKDLETLF--

ISILEGITEPRMENLPAGVCRNFIQAGPRAAVGMIFLLLDEAGRIYTIDGDLRELPKSVKSLIGLVDSTAAK  
VLSATYATDRLRIRYADCEVLVAEANLYAYKDERKEMLRMVPVYIINEAKRRQLVILALSLRGGHRRAM  
ASIGVMIAAAILESQAEMGVVDHEEPDILLDDAEIVGTAMMISRQAALDLKQIVRSDVVVVPDFQEK  
MVVSLRFFCTEVAIFVIALITTVGDMLSREPNSAKETGAGFQKRIRKHSVLFLEVSFERRNCRDA-  
RPDLFLGLGLATPRYGIFYTNQPKKKQMPSEPDSRVDGFELVHAIKADTGSNHELDMPEAMALAVE  
ADAAINLAAGVLAFKG-MTAIERVDSKRKMALATEKWNISKLDMADIHLSGAAQMRATG-  
IEQATLSAALATKIL--  
LYLPGASNSALEEDKLNAGASSAEAAEERQTRILLVTPVLVVIQDSSAAGLITNGGLEEWGTMAYKK  
HYAFAARMRLHMRTIDCIEVGVEMEPSKQKAEKVKTVKLQGDTRFRQLAIDGIKEQMP-  
LHALNPDAFVLPVLPVTPAVGRVAADAVLGARVPCFSL-  
RELQKSMRGSALPITAIRLLPMRAARAMIEEDIMVAGKVAA-  
LLKIRAHETVMGIILRNDSEATAPWRLSVAERLEADAKRMAGYAARPFISKPSLCDVQAHANVAEAIET  
IAAGYVAKDQRFVYPVEGIKIRLILSSPHSRVGEAKRASEAHLHEMAKELIAKAVMMLKSEPDTNTEGLL  
NYVTTNQPTDLLFPDCLDVIDMRMSIV-----  
VQLTVV-  
HVVDGVRDVG DY EIMAAAAPSGLVQVERVDDRTGRERTIMW MYGAMEDLWLMSVRYADWVA  
DCTIGVILHVYAQTINRAFSLTRLQLEGWPPEATRWWNTWQLWLNKDGFFGYEAAFRAVRQALKA  
ALFGYEMSDIEGVGRYQSRQELRVGYRIREQVDFARLDPRTDILLQAKTRLAVIRHALALVAILLRD VV  
GEFTLVVAHEDVAMGHVECVLAECDFTEKNAHIGPVGLRTPETVLGDGTVLQEAVLGKIDLANTVV  
DYRYLFVVDGGRELGVWWLSIENMLYPRIWLPPAQAALKNLLPICFFLSHPELDLWRV-  
GLWEGISKARAQQLMAGALIEEILDAVARFADPEATTHQSNKERHFKYYGEEVDPVHLAYILDLFALV  
ATQVVVSDRLLKDRYVLSMRVFRGFTSLLWVALQLAEKGPAATVITLGTIAGLGALVLFILL-  
REHVLVETLFYRYVY-VMLGYSAAKDVADADPEHLLVLAAASRDVEFIEIVPAFFYYFVTAK-  
FEPFNTAVAKEFFGLFEERLRVIDVLAVPPDRVEALVEFVALAGTLPTS AEALPGIACGLCEPN AAGVLE  
ADQDWN LHRTMGITLAFFEARES VKNWFDKGLHKEVAETGLREAGGFTTTNLCGKEAKKCVPAIHRV  
VDLGELETGLIEIDSAVMVADEEQTLADRP TTREKKVGAVGGVVL AGTMNMGSALDQVERGGNIIEL  
EQEQYHAVNGKKADGKLT DKVLMVLSCAYFPIIRKMASATALDKGVFDLLITAPEEADNLDHGGVLT I  
PIPTVHAE-  
AILYAESEIDRIAWIAPMHLLGTLPAVLLFEPDQYSFISMMIDASLEITQTAEV LDDYHVLEKGARPPSFR  
VILIRGLHIRLLAAIGTIIVVGSAGRSEITAYIQGKAVPISLSKATFLPAFAASSCKLVDIFSTMLRPPERSTV  
QMLILETVAEL-  
LDVTRLANDKLERLLLLLPGLDAAQLLALLAAATDFSDIVTISKAITAILSVA AERVVLR ELLLELAEIAISSL  
ALALALLMLTPDRGLTQKERTREAQKKELIQGGAVLQVHAADAMVLASTADKVR LNTDEGTTSFAF  
SLNLATVSDGFYVMSSAVLQLSSDLMMIVSVSRVLADKETKNALVVRHPEQVK TQPTYAEGSPGMVL  
QTLTTCIPPLAIKPEDVELLWTLVAALWRVKAHLAEARRPRLERV LILLALALIVVLLQSEGGGMGGG-  
MGAAAKILASF SILT IKASVGDEV RKVARRVMDLSSRLGRPEESVNPEFRGEELEQTKFEAA NVEVDCM  
ETIRRFVDIPFLVSIRTQHNESED RGARLVL-----  
PEIAALGKIAALDH FISVND AHISNYVTADISSVLGMLLLVLF IQQVRVAKVWWPTRREVTMV FIMATIA  
IFFLVIGLG-KLVFMLGGISPLQITTLVLGEGVMAVRQASTFPADS-  
VTILQNTYADLICAGRVTKADIEASLHIVVGARVARGTWYVIYPYEITQAQGEAGIMQRAFRQATLSKS  
LIDGRIEVKVKVVTSDRYA-  
TYEIKGGQHRKGTRFTRVKMGHNIPVDLLARIKMAFGDPNLILVKTFGAVVQKRFAAPLTHMRHGAV  
TIGPMEVASPYIKMKKARHAPGDSVVEIKPDNIVRSVAVVPELIWARENEDQSAVHDKYVKVTHKIAA  
KRNAAVDKAQYDKRNQVHLSFIGLAVKVLPAQAIVDATA GTLLPTASVAVTENLKGVAATIRLDPME

KALIAYIKMRPQLNLAGKTDNKIVKCLNNNLDDVEYGKLGRRALKPLTIKSVYDVESRRATELVKLM  
YKDDVESRKSQFAEK--  
ALFEPLKAFMMLFGFIARAIYALYLRVVRTILLVKTIVVNAKTVLSAIIIGVSIRLRHKSTNVAETNHHI  
KTIEKRARMTLAGGPSVKLHLHPGRIGMKGGRIGYMPYKNFNIFEGLASGRNRKVRELAKLKTVDKTI  
TVEGIRTRQQGGRIPKADLSNAI-  
NTRVGVDIVGENEQEESNPRANAEMGQIFAAIDARVYALVAALIGHALEAVLALAAIQGIGKAHALLA  
VKLHVNAGIELHSAA-VEKAVAAA-YAQPAGEA-AIADVSEG-LGLTRVNSASLDVCRMRRRQLA-  
LKKTCKDAYMELTCFAGKGDRVKIVDASQTQFYEIVATRTAERHGIKAKGTFGKERAMMQITPSKPVK  
VWVPVVFVSEEELLAPIRTFAETNGDGVTVVVKLT KDVKVTMFEKAVASLAVTGKSTTVIYTVLEKVT  
KDIIEQRAKAHYGRRLRSHVVTHTKQDRHLSMMRRTTVADPRMNAARLTDGEVSVITGATMAFV  
MSEQDAV--  
GDVDMHFHEEPREAAALGIAGPETFLATEQPRVLAVIFLREYLIHIIIGTRGEFNNAATIIDILRAMQSK  
LDRKLSAEIAKVRMCLHDDLADMGVRQEAPRRETAGDPILSAYWINGVTAQSDIILLVANLECKTAPE  
NINCAVRLFYQRVTLQAKERGGDVTVLVAQNQIEAAEGTVIYEIKGKTPGTIQWKLNIDAISSIVKS  
LAVQLFQVDLFLNDTWIATLLRAEDVVYVDKAGKEAVDHVVERDKALEMAPQKDIVRRKIRVYTP  
AAPSAVVIWDAAIERADKADAQGTIIKVYGPDLQDISCFDIGAEPKIESVKSWEKEKYVVHRDDIPP  
DI-TLVGKSSKVNKEFGIPDVAVCAPSK---  
VESIDRGEPKAGSCGEVANLPYPQESLVNRVSSANVQKNISMVLGGHPVGEMGISRKVERHLETNM  
CEIFVDKADVDVALDFYTLTLPLRVGLDKPNAKVEIDGKESRKLMAILDGDAALQRHPKVSEASGTGT  
-AGAKARLPDDALIFDGLVHGDISFTATDLPDGRV-  
VTPVANTVKAQLQIDKVLRTFHVVTLSFSSHKEENLIKRLNALKKSTRHYEMLLKIRDTECAQSPHA  
IPVGKILKIDALLQTICVAHYVAIEPLLADDLTALGVMGDQGLLHIVPRLMILAVLHLWGLEAAEIVPHW  
-LPRRALITDLTMGLRLRARDWTY-AISEVVGNTFFARTADDDTQQR LHARNPI-VLL-YGKFGMV-  
ISPSGLRLDSTAPAPDEHGNADALILSRERLQDAMGYFVLRIILLVFDEIILAWGSGDEPLKFLVADQAV  
TGRDNPGLVCLTRRTFPLDLQRDATFVMVFEDSTMKNLSHKKMHMNLILIKSGWIVNVSTKILISDQ  
AIASYAEAGAHSQPSESALAVITSRVMAPIVLVLSQKPTAPSKTMFLEALNLLDEVATV LNRPKRYI  
FEGDLISVLHTVQASVIIGMQRPQPD RMRAVVATAIRLAIALGSGVVVSLEAGVINFARAISLAR--  
YPLPTLL-----DFVRNHKTSTKRDKPYKAHPKV LHKADSNKGLVAEGVDTLA  
>GCA\_000152965  
AVIKPVVMKAYAPVLMIRQTQVATVSGAGSPALRAKTVFRKSGLQRKTSSKWVAKPLY-  
GVVKMGNIQVLVSISVDKRAVCTVAQLVEQEVVHGLVALDAVKRKIALEEMNGMTTEDPAKVAEFE  
AELDLKRFRDADARS DILPVLLGLTLEVRFPHEPVVHDLPLPVIYEVI-  
GIMADKGGIEVDDCAVSSAVSDVDPIAYVSPIDLEAVAGTEMAFIDQEA AVAAAARETIALEELALEAGI  
LVVGI-PLLLPV-FGEEGDV-MSFAARSRTLKSIVALAVAYPALTRA-IE-AIASEM-  
MEAAQAAAAAEKRGTAEQIRIVKRMQRSSGLADDAELVIEDAAEGNSSWAGQIYDDPISGSSES  
AGSIVHAANKRQNFARSITFLRKVEISNKAAPLMRGVKHNSKSRTARKLDDDIAGLNFPNVPPGIAIR  
AAANKPADRLHDATEGEEILLVVRWHVTWKTAVIVLLVLLAGDVVGLIRLGGA AVGRP DGM LNR  
HHKLNGSLIEQRPIIEKMTLRLRAALKEKLGKDQIIIFVVKVQGD LIADATI QMG-  
GPVGAVVAIQGELIFVRRHKQTIITDQEATV-VLKGVAEGPADAQALLRIRVTHTLVELSVLLIPE-  
PVLVDNVSIREGVGKALQIIQLDVYLLRDMGTGEETLAESK-----  
-----  
RSILAAVTEPRMENLPDGVCRFITAGPRAAVGMLFLLLDEAGKLYAIDGDMRELTKSVKSLIGLVDSK  
APKVL SAGYAEARLRIRFADCEVLETEADLYPYKEERRQLMRMVPVYIIAEAKRRQLILFALS LKGGHRR  
AMMALNVMLAAAIIESQTEQGKVHHDEPQILLDDAEVVGTAIMITRQGALDLKQILKVDVIVLFPEFQ

EKLVVSLKFFCTEVAIFVIALITTVGEMLSREPEHAQEEGAGFQKRIRGHSVLFALEVTFD RANCRRNAL  
PDVFLGLGLAEPRYGIVYTNQPKKKQMPSEP DGRVDGFELVHAIKEDGRS-EELEMP EAMALAVE-  
DATINVSAGVLAMTGGMVAVEKVDSKRKVALAATKWNISK LQLVDVSISGAAPVRSCG-  
IEQADLSAALYAKKVWFLFLPAASNAELEEELD GAGASTAEAAEDKQIDILLVKPVMVVIQDSNSAGL  
VANEGLDEWGT MAYKKHYAFAARMRLHMRTID-----  
MNP NKQKSEKVKTVKLEG DTRFRQLAVDGVKEQMP-LHALNPEFAV-  
LPILVTPAVGSVAADENVLGARVPVDASL-  
RELQKSQKGSALPISAIRLLAMRAARGMIEEDIMVAGKVAA-  
LFKVR ALETIVKLVL RNDSEATLPWRLSVAERLEADTKRASGFAARPFKTKPSLCNTQAHSKIADPIQEIA  
AGYVATEAKFVFPVEGIDIKLILSSPHSRVGEAKRAGEGHLHSMAKELLAKAVVMLRNEPDTNTEGILN  
YLTTNQPTDLLFEDCLDVIIDIR RMSV-----  
VHLNTV-  
KVVVDGVRPVGDYEIMAAA VSGLIQVEQVDDRTGREKTMMW MYGAMEDLWLMSVRWADWVP  
NCAIGA IILHVYAQTINRAFSLSRLQLD GWPKEARWWNTWQLWLNKDGFFGYQAAFR AVKQILKA  
TQADFEMK DVEGVGRMQSRQEV RAGYRIREQVEFARLDPRADILLQAKTRLSIIRHALEVVAILILRDV  
APEFT-  
VVAYQDVARGHVECVLAESFDFTEKNTHIGPVGLRTPDSIFGDGTVLKEAVLGKIDLANTIADFRYLFIL  
DGGRALGVVWLSL-NMLYARIWLPPAQADLKDLLPICFFLQHPELDM-----  
ISKARAEQLMAGALVEEILEAVVRFADPEATTHQSKKEKHFKYYGEEVEPVH LAYILDLFALVSTQVTLS  
DRLLKDRYVLNLRVFRGFTALLWLSLQLAAKG PVATVITVGTIAGLGALVLFILL-  
RDSVLVETLYRYVYG-  
MRGYSA AKDVQDADPEHLGELSAASRDIEWIEIIPAFFYYFKTAKSRRTLNTAVAREFFGLFKERLR IIEVL  
AVPPDRVLDFVAFVALAGTLETSATALVGVI AVGLCEPNAAVLEAERDWNLHRSMGITLAFFEARDS  
VKGYFDKGLHKDVAEIGLREAGAF TTHFLCDVDAKRVPPIHRVLDLGELEAGLIEIDS AVVVADEEQT  
LADKPTTRDKSVGAVGGVVL AGTMNMGANLESVERGGNIIIEEEEQYHCVNGKKS DGKLTDKVLM  
VLSVAYFPVIGRFASANALDRGVFGLLIEAPTDA DNQDHGGQMVIPIPSILTETTPLYAESDIDKIAWIA  
PMHLLGTLPAVLEFEPDFQGFISMMIDASLEIMDTAEVLDDYHVLEKGARPAAFRVVLIKGMHIRLLAA  
VGTIIVVGSAGRSEVTAYIQGQAVPIILKKHTFLPAFAASSCKVVDIFSTLLRPPERSAVEM LILETVAEL-  
LEVTRGENDKLERLLVLPGLDLALLLTLLALADDFSDIVTISAAITAILSVAAEAVILREMLLT KAEIAITAL  
ALALALLMLTGDEGLTQKENIREEQMKELIQAGAVLQLHAGDAMV LASTADKVRLDTDEGTTS AFA  
SLNLATVSDGFYVLSSAVLQMSSDLMMIVAVARVLADKESKNALVVRHPEQVK TQPTYAEGSPGMV  
LQTLTECIPPLAVKPEDVELLWTLVAALWRVKAHLAS AARPHKERV LILLALGLIVVLLQSEGGGMGS  
GAMGSAAKVLACFSILT KASVRDEVKVTTRVMDLSSRLGRPEEAVNPEFKGEELDQTKYEAENVEV  
DCMETVRRFVDIPFLVSTR TQHNESED RGARLVLDVTRVRFIDTVVTKRSDVILVERVETDGMVIAREMA  
KDMQALHETAAALGKVSALQHFIALGDAHISNYVTAQAHSVLGMLLLVLF IQQVRVSKVWVPTREV  
TMVFIMAALAVFFLVIGLSLNLVFMVGGISPLQITTLVLGEGVMAVRQTSTFPAES-  
VTILQNTYADLICAGRVTKADIESSLHIVVGARVAR GTWYVIYHYEITQAQAPAGIMQRAFRQATLSQ  
SLINGRMEVKIKVVTSDRYA-  
TYEIKGGQHRKGTRYNRVKVGHNIAVDLLPRIKMAFGPPNLVLVKTFGAVVQKRFAQPLTHMRHGA  
VTIGPMEVSSPYITSKKARHAPGDSVVDIKPDNIVRSVAVVPELIWARENEDQS AVHEKYVKTT HKIAA  
KRSRAVDKAQYDKRNQVHLSFGLAVKVLPEQAIVAATAGTLLPTATTTVTEGLKGVAATIRLDPM EK  
ALIAYIKRMRPQLNLQGKTDNKVVKCLNNNLD DVEWGKMGRRKIPITIKSVYDVEHKQATELVKLM  
PYKDDVEGRKSQFAEK--  
ALFEPLKAFMMMFGFIARSVYALYLRVIRRTIILVKT KIVVNANNVLSAIIIGVSIRLRHKT TNVAETKHHI

KTIEKRARMTLAGTGAVKLHLSPGRVGGKGGRIKGYMPYKNFNIFDGLASGRRAKVAELAKLKKVDKTI  
AVDGIRTRQ-  
GGRLPKAELSNALSKTRVDVEVVGENEQAESNPRANAEMGQIFAAIDARVYSLVAAMIGHALEAVLA  
ICAILGIGKAHVMLAV-LKMNAGIELHSAA-VARAVAAA-YAQPGEA-  
AIADVSEGLQALASDQSLDVCRLRRRQLG-  
LKKTKEAYMSLTCFAGKGDRIKIEATQTQAYEIVSTRTAERHGIKAKGTYGKERAMMQITPTKPVKV  
WVPVFNDDDELLAPVRAVAETNGDGVTVVKLSNDIKITMFEKGVASLAISGKVTTLVYTVLEKVTELSK  
DIIYEQRAKAHYGRGRLRSHVVTHTKQKRHLMMKRTVVADPSMDAARLTDGEVSVVTGATMAFV  
MSEQDAV--  
GDVDLHYQEEPRREAPLGIAGPETFLSTEQPRVLALLFLRAYLMHIVDIGTVGGFSDAATIYDILRAMQ  
NKLDRLKLSAEIAKVRMCLHDDVEGMGVTAAARRDTAGDSILSAYWINGVTANSIDIILLVANMECKT  
VPENINCAVRLFYQRVTLQAKERDGDVSVELVPAQNQIEAAEGTVIYTIKGTPTAQMKNLIEAISRSI  
VKSLAVQLFQVNLFLNDTWIATLLRAAQNVFVDAREGKEAVDHVVERDTALEMAPQRDIVARKIRI  
YTPAAPSAVVIWDPAIEREDKADAQGTILMIYGPDLQDISCFTDIGAEPKIESLASWDEKEKYVHRDDI  
PEDITTLVGKSSKVNREFGIPDVQVCAPAKPGVTESIDRGEPKAGSCGEVANLPYPQESLVNNVSSAN  
VQKNISMVLGGNPVGMGIARDVERHLETNMCQIFVDKADVDVALDFYKIVLTPLRVGLDKPNAKVE  
IEGKESRKLMAVKDGEAALQRHPKVSEESGGRVGGTEKAKLPD DALIFDGVQHGD LKFTATDLPEGRV  
-  
VTPVFNEVKAQLEIDKVMLKTFHVVTLSFSSEKGEHLIKRLNALKKSTRHYEMLLKIRDTECAQSPHA  
IPVGKILKIISLLQTCIVAHYTAIEPLMAEDLTVLGVMGDQGLLHVVPRLMILAVLHLCPLEAEDMLRTW  
GLQQRAILTDQTMGLPLRERQWSY-AVSEVVGNTFFARTKEEDTEQRLHARNPI-MIL-YGKEGLL-  
ISPSGLKLSSTNPSDADHGNAEQILSTERLQDSMSYHILAILLVFVDEMILAYGSGDDPLKFLVANQA  
VTGRANPQLVCLTRRTFPLDLQRDATFVLVLEDTTMKNLSHKKMHMNLVLVKPSWVENVSTKILIS  
DQAIASAYEDAGAHTQPGESALAIITSRVMAPIVLVVSQKPTAPSKTLFLEALNLYDEVTATVQKRPKR  
YFVFEGDVVSILGTLDAAVILGMQRQPDPRLRRAVVAAAIRLAIAMRGSGVLAQLEAGKINFSAIDFA  
E-LY-GLEAA-KFAIS-VALDFVRNHVKVTKRARPYKGHTKFLHKASAEKGLVAEGVDTIA  
>GCA\_000153305  
AVIKPFLYSEYAPVLMIRQQQVATVSGAGSPSLRAKTVYAKSGLQRTSTKWVASPFYY-  
GVLAMAKIVQLVSISVDNRSVCTVAQVVEQEVVHGLVALDAVKRKIALDEIDGMTSEDPAKVVVYD  
GELELKRFRDAEDRADMLPVLLGLTLKIKFDPHQPVVHDLPIPVIFEVV-  
GIMAQKGTIEVDECAISTAVSDVDPIAYVSPIDLEAVAGEKVAYIDQEA AISAAKDEIALEELAESAVLV  
VGI-PLIIPV-FAEAG-T-MSFANRSRALATIVNLAVAH PALTRARIE-AMISEM-  
MRAARAAALADRRGTAEAIRIVKRMQRSAGLADDP ELVIEDAAEGNAQWAGQIYDDPLSGSSES  
SAGNIVHAANKRQALARSITYLRKVELSDKANAPLMRGVKHNSKSRASRLDDAIAALNFPNVPEGIA  
IRAEAGKPETLLHDATEGEEILLIIVRWDVTWKTA AFILLALRAGNIVGLIALGGIAAVGKPDGVLNRHH  
KMNGSLIEQKRIMDKMTLRLRASLKQKLGA EAVIILV-----  
-----  
DSEATVEVLRGVAEGPADAQALLRIRVDHTLVKLSVLLIPQVPVLVESVTIREGVGKALQIIQLDVYLLR  
DMGTGEDTLAKSRRELIRDVLAVDPITSVQLAYGRLKERASKNLTLKDLETMF--  
LAITAGVTEPRMATLPAGVYRTLVEAGPRAAVGTLFLLLDEAGRLYGISGDLRELTKSIKSLIGLVDASVP  
KVL SAVYSTGR LKVRYADVTVLTS DAGLYAYAEERKEVLR MVPVYVTTAAKRRQLVLFALSRLGGHRR  
ARAAIGVLIAAAIRESHAENGAVHHAAPAILLDDAEITGSEMMISRQSALDLKTVQKVDVIVVFP EFQE  
KMVVSRLFFCTEVAIFVIALIVTVGQMLSREPAS AQESGAGFQK-----  
-----YTLQPKKKQMPEEGD TDKVDGFELIHVVKEDASN-EELEMP EAMALAVE-



DSTINVTAGVLALSGEMAAVERIDSKRKMAQAVAKWNISKLALADLSLSGAAKVRALD-  
IEMAHLAALDSKKIWFLFLPGANNAELEEKLDGAGASSADAAEDRQLAILLVQPVLVVIQDSNAAG  
LIANDGVDEWGTMAYKKHYAFAARMRLHMRITD-----  
QLEPNKQKSEKVKTVKLEGDTRFRQLAVEGVKEQMP-  
LHALNPDAVLVPVLVSPAVGRVAAREDVAGARVPCDASL-  
RELQKSQKGSALPISAVRLLGMGAARAMIEEDIMVAGKIAA-  
LLRIGALQTICHIVLRNDSEATLPWRLSVAERLEADTRRGGGYAARPFKSKPSLCNVQAHAKVSEPIQEI  
AAGYATEERFVFPVEDIAIQLILANTHSRVGSEKRAGEGHLHEMAKELVAKAVLLVKSEPDNTNTEGML  
DYFTTGQPTDLLFEDCLDIIIDLRRMNIV-----  
VHLNTV-HVVVAGMRPVGDYEIMAAQAPSGLVQTERVDERH-  
RERTKMWMYGAMEELWLMSVRYADWVVDTSIGAIILHVYAQTINRAFSLTRQLAGWPPEADRWW  
NTWQLWLNKDGFFGYAKAFRAVKAILKADLDDYELKDTEGVGRMQSRQELRVGYRIRRQVEFARLQ  
PRTDILLQSHTRLAMIRHALTLVAILLREIVAEFT-  
VVAEEDVAMGHVECVLADSFAFTAKNADIGPVGLRTPETVLGDGTVFRAAILGKVEFENTVAEFRYRF  
VTDGGRRLGVTWVTLRNMPLYARIWLPPAAAALKDLQPIRFFLGQPSDLAQFDGGFE-  
ISKARADRLMAGALVEEILEGVARFADPEATTHQSRKARHFKYYGEEVDPVHLAYI----  
ILVATQVTISDRLLKDRYVLNLKI-RGFTSLLLLAAQLGEKSPAATITVDTIMGLGALILFIILL-  
RDLVLLETLYHRYVY-VMKGYEAAKDVADADPEHLLALAAVTRDVEWVEIIPAFFYYFKTAG-  
FEPFNTAKALEFFGLFEERLRIVDVLAVPPDRVEALVEVVALAGTLATSAEALPGVIACGLCEPNAAEVL  
EAGQDWNLHRHLGITLAFPEARQSVKKWFDKGLHKDVAATGLREAGFTTPFHAEEVARKCVPVIHR  
VLDLGEIEAALIEIDSAVTVADEEQTLADQPTTREKAVGAVGGVVLGTMNMGNNLEQVERGNIIIE  
LEEEQYHAVNG-  
AADGKMTDKVLMVLSAALFPVLARMVVSANALDRGMFDLLIEAPNDVDNLDHGRELSIPAATIHGETT  
PLYAEAEIERIAWVAPLHMLGTLDVLLFEPDQYSFMSMMIDASLEITETAIVLDDYHVLEKGGRPPEFR  
VVLKGLHIRVLAGIGTIVVGSAGRSEVTAYIAG-  
AVPITLNKHTFLPAFAPSSCVVIDIFSTLLRPPERSAVQTLILETVAEL-LEVTRIENDKLERL-  
LLLPGDLAALLGLAAAAEDFAAIVTIDAAIVAILSVAEAEVVLRELLLSLAEIAVTALALALALLMLTRD  
RGLSQREHAREAQMKVLIQGGAVLQISAAEDMVLAATADKVRLDTDEGTTSAFASLNLATVSDGFYV  
LSSAVLQLSSDLMMVVGVARVLADKEHKNALVVRHPEQVKTQPTYAEGSPGMVLQTLTAAIPPLAIK  
PEAVELLWTLVAALWQVKARLASATRPHEERILVLLLALSLIVVLMQSEGGGIGGG-  
MGSAAKGLAAFSILTMKAAVGDEVKVRTRVMDLNSRLGRPEESVNPEFRGAEEQSKYEAAANVEVD  
TMETIRRFVDIPFLVSTRTQHNESEDGARMVLDVTRVRFIDL-  
VTKRSEILAARAETDGIISREMQDLQALHPEAAALGKIAALQHFIALNDGHISNYVTAAIHSVLGMLL  
LVLFISQVRVSVKVTWPTRREVTMVFLMATLAIFFLVIGL--  
QLVFMLSGISYQQLTTLVLGEGVMVVRQTSTFPADS-  
IGILQNTYADLICAGRVTKADIEKSLHIVVGARVARGTWYVIYHYEITQAQAEAGIMQRAFRQATLSQS  
LIDGRMEVKIKVVTSDRYA-  
TYEIKGGQHRKGRFNRVKIGHNIPVEILPRLKLAYGDPNLILVKTFGAVVQKRFAQALTHIRHGAVTIG  
PMEVASPYIKNKKARHAPGDSVVDLKPDNILRSVAVPELIWARENEDNGAVHDRVKTTHKLQAKR  
NRAVDKAQYDHKNQVHLSFIGLAVKVLPEKAIVHATAGRLLPTEAVSVTEGLRGIAATIRLDPMEKALI  
AYIKRMKPQLNLGGKTDKRVVKCLNNNLDDVEYGKLGRRRIKPITIKSVYDVEHKRATELVKLLPYKDD  
VESRQSQFAEK--  
ALFEPLRAFMMLFNYIARCVYALSLRVVVRTILLVKTRIVVNASTVLSAIIIGVSIRLRHKSTNVADTNHY  
IKTIEARARMTLAGAGKVKLNLRPGRVGKKGGRIGKGYMPYNNYNIFDGLSGRRRAKVKELAKLKKVVK

EITVDGIRQKQGGRTPKADLSNAIANSRVDVDIVGENEQEESNPRANAEMGQIFAAIDARVYSLVA  
ALIGHALEAVLAVAAIWGIGKAHGLLAVRLKINAGIEFHSA-VDDSVAAA-  
YAQPAGEASALWDVSEYPSVALLSEASVAVCRLRRRQLSELKTKKEAYMSLTCFSGKGDRVKIVEAS  
QTQAYEIVATRTAERHGIHAKGTYGKERAMMQILPTKPVKVVVPVFNVEEELLAPIRAFAETNGDGV  
DVVKLQNDIKITMFEKAVASLAVTGKNSSVYTVLEKVTELMKDIIYEQRAKAHYGRGRLRSHVVTHT  
QQKRHLMMRRTTVADPRMDAARLTDGEVSVITGATMAFVMSEQDAV--  
GDVDLHYHEEPSREAALGIAGPETFLATEQPRVLVLLFLRAYLIHIVEIDTVGGFSDAATIIDILRPLQNK  
DRKLSADIAKVRMVLHDDVADMGVTAEPREAAAGDAIL SAYWINGVTANSDIILLVANATCATVPE  
NIDCAIRLFYQRVTLQAKERGGDVTVARVKAQNNQIEAAEGTIIYTIKGKLPGTVMKLNIEGISRSIVKSL  
AVQLFQVDTFLDDTWIATLLRAARDVVFVDAREGREAVDHHVVERDTELELAPQKDIVARKIRIYTPAA  
PSAVVIWDPAIEREDKADAQGTILKIYGNLQDISCFTDIGAEPKIESLKSWDEKEKYVVHRDDIPEDI-  
TLVGKSSRVNKEFGIPDVAVVAPSKPGVTESIDRGEPKAGSCGEVANMAYPQESLVNSVSSANVQKN  
ISMVLGGHPVGEMGISREVERHLETNMCEIFVDKADVDVALDFYRLELTTLRVGLDPPNAKVEIDGKET  
RKLMAIRDGAAKLQRHPKVSAAATGTG-TAGAKARLPDDALLYDGVHHGDDVKFTITDLPEGRV-  
VTPVLNDVKAQLKIDKVMLKTFHVVTLSFSNDKGEHLIKLRLNALKKSTRHYEMLLKIRETECAESPHA  
IPVGKILKIDSLQTICRAHYTEIEPLLADDTALGVLGDQGLLHVVPRLMILAVMHLWGLEAAELPRW  
GLQARRIVTDQTLGLAARERHYSY-AISEVVGNTFFAMTKDDDTEQRLHARNPV-VLL-WGKFAMV-  
ISPSGLTLASTPETALEHGNEADLILSRERLKDEMAYYVLNVLLVFVDEVILGYGSGRDPRLFLVAEQAV  
TGRANPGLVCLTR-  
TFPLDLQRDATFVLVFEEDSTMKNLSHKMKHMNLVLIKSKGWVVNVSTKILISDQAIASYAEDAGAHT  
QPSESALAAITSRVIPIVLVVSQKPTAPSKTLFLEALNLYEDVTANVLNPPKKYYIFEGDVISVLRTVDA  
AVLKGLQRPQPDRMRRAVIAAAVRLAIAG-----HSLEDGTINFARALSFLR-  
EYPALAPLLRAPLGVQAVEFRVRNHKTSTKRDRPYKGHTKFLHKADIEKSLVAAGVDTLA  
>GCA\_000153725  
AVLKPVSLNTYAPVLMIRQSQVATVSGAGSPSLRAKTVFRKSGLQRKVSTKWVASNLYF-  
GVLQMGKIVQLVSISVDNRAVCTVAQVVEQEVVVRGLVALAAVVKRIALQEISGMTTEDPAKVIEFEE  
EIDLKRFRDADDRADLLPVLLGLTSLIKFDPHEPVVYDLPVPVIFEVL-  
GIMAERGIEVDECAISTAVSDVDPIAYVSPID-----  
GDKMAYIDQQAASAAKEEIGLEELALESTVLVVKI-PLLLPV-FGEDGDN-  
MSFAKRSRELSSIVDLAVTAVTLTRAR----IAAAM-  
MGRAQAAAALERRGTAEIRIVKRMQKAAGLADDPDLVMLEDAEAGNAAWAGQIYDDPVSGSSES  
DSQGNIVHAANKRQNFARSITYLRKVEISDQAAAPLMRGVKHNSKSRASRKVDDAIAELNFPNVPEG  
IAIRAEQKPDHTLLHDATETEEILMLIVRWDVTWKTAIIIGLMFTAGDAVGMIDLGGAIAVGPDPGLL  
NRHHKLNGSLIEQKRVIDKLTLRVRAALKQKLGAESVILVVKVQGDVADATVQM-  
GGVVGAVVAIQGDVIFVRRHRQTVVTDSESTVEVLRGVAEGPADAQALLRIRVDHTLVEVSVLLIPE-  
PVLVDSVSIREGVGKALQIIQLNVYLLRDMGTGDETLAESNSRELIREVLTIDPITGVTLAYGGFKERASK  
GLTLKEIETL---  
RAILADVTEPRMENLPEGVCRTFVQAGPRATVGMIFLLLDEAGRIYEIDGDLRELPKTVKSLIGLVDAKA  
PKVLSASYATERLKIRFADVTVLESEADLYAYAEERKELLRMVPVYVINEAKRRQLVIFALSLKGGHRRAR  
AALGVLLAAALLESQAEQGEVHHQAPEILLDNAEVVGTSMVSRQSALELKHLLKIDVIVVFPEFQEK  
M-----PEHAQESGAGFQKRIRRHSMLELECTFDRRNLGDA--  
ADFLDLGLAPPRYGVVYINQPKKKQMPSEPDGDRVDGFELVNAVKADGRT-  
HELEMPEAMALAVE-  
SAKINLTAGVLALKGGMAAVERVDSKRKLGLAATKWSIAKLSGIDVLLAGAAPVRATG-

IELADLSAALSAKKVDALYLLGASNAELEEKLDGAGNSTADVAEDRQRLILLVHPVLVVIQDSNAAGL  
VSNGGVEEWGTMAYKKHYAFAARMRLHMRTID-----  
ELEPNKQKSEKVKTVKLEGDTRFRQLAVEGVKEQMP-  
LHALNPDFAVLVAVLVSPAVGQVAADTTVLGAEPVDFSL-  
RELQKSQTGAALPISAVRLLMRAARGMIDEDIMVAGKVAA-  
LLKIRALETVLKVVLRNDSEAWGPWRLSVAERLEADTARASGYAARPFKTKPSLCNTQAHAKVADPIQ  
EIAAGYVATEERFVFPVEDIDIQIVLASPHSRVGEAKRAGEGHLHEMAKELVAKAVLMLQNEPPTTTEG  
LLNYLTNNQPTDLLFPDCLDVIIDLRRMAVV-----  
IHLTTV-  
HVWVEGTSPVGDFEIMSAAAASGLVQVERVDDRTGRERTKMWMYGGMEELWLLSLTYADWVPDC  
AIGAILHVYAQTINRAFSLTRQLLEGWPKEADRWWNTWQLWLNKDGFFGYEAAFRAQAQVLKADL  
FDYQMSDVEGVGRYQSRQQLRVGYRIRDQVEFSRLDPRTDILLQAKTRLSVIRHALKVVAIVLREV  
GEFSLVAMEDVAMGHVECVLADSFDFTEKNAHIGPVGLRTPDPIFGDGTVLKEAVLGKIDLRNTVAE  
FRYRMITDGGRELGVKWITIQNILYPRIWVPPAQAALKNLLPICFFLSHPQLDM-----  
ISKARADKLMAGALVEEILEGVARFAKPEATTHQSRKTKHFYKGEEVDPVHLAYILEVFALVATQVTVS  
DRLLKDRYVLNLKV-RGFTSLLWMGAQLAEKGPAATIITVTGTIAGLGALVLFILL-  
RDHVLTLETIFYRYVY--MRGYSAAKDVADADPEHLL-LAAVTRDVEWIEIVPAFFYYFKTAT-  
FEPFNTAVAKEFFGLFEERL-----  
SPNAAAVLEADQDWNLHRSMGITLAFYKAQKSVKGWFDKGLHKAVAETQLSEAGAMTSPFAAETE  
AKQCVPVHRVIDLGEIEAALIEIDSKVVVADEEQTADKPTTREKSVGCVGGVVLGTMNMGANLE  
QVERGNIIIIEEEEQYHAVNGKKADGKLTDKVLMV-  
SAALFPVLARWASANALPRGVLGLLIEAPSDADNLDHGGEMSIPAASVHAETAPLYAEADIDKIAWIA  
PIHLLGTLDABL-  
FEPDQYSFISMMIDASLEITESAEVLEDYHVLEKARPSSFRVILIKGLHIRLLAAVGTIIVVGSAGRGEITA  
YIQTRAVPITLNKHTFLPAFSASSCHAVDIFSTMLRPPERSVQMLILETVTEL-  
LDVTRGENDKLERIEVLLPGLDAAELLELVAAEDFANIVTIGAAITAILSVAAERVVLRRELLTKAEIAVT  
ALALAIALLMLTPDGGLTQREEAREEQMKELIQGGAVLQVHAADRMVLASTADKVRDLTDEGTTSA  
FASLNLATVSDGFYVLSSAVLQMSSDLMMIVTVARVLADKESKNALVVRHPEQVKTOPTAEGSPG  
MVLQTLTGMIPLAIKPEQVELLWTLVAALWRVKAHLAEAAPREERILVLLLALSIAVLLQSEGGGM  
GGG--  
SAAAKILAGFSILTKASVGDEVKRVTRRVMDLNSRLGRPEEAVNPEFRGEELEQSKYEAEVNDVCE  
TVRRFVDIPFLVSIRTQHNESEDRGARLVLDVTRVRFIDL-  
VTKKSEILVERAETDGVIAREMAKDLQALQPEIAALGKIAALQHFISLNDGHISNYVTAEIHSVLGMLLL  
VLFIQQTRVAKIVWPTRREVTTVFIMAALASFFIVIGLG-  
NLVFMVGGISPLQITTLVLGEGVMAVRQTSTFPAES-  
VTILQNTYADLICAGRVTKADIESSLHIVVGARVARGTWYVIYNYEISQAQGEAGILQRAFRQATLSQS  
LIDGRMEVKIKVVTSDRYA-  
TYEIKGGQHRKGRFHRVKVGHNIPVEVLPRLKMAFGPPNLILVKTFGAVVQKRFAQPLTHVRHGAVT  
IGPMEVASPYIENKKARHAPGDSVVDVKPDNIVRSVAVVPELIWARENEDQSAVHDKYVKTTTHKLQA  
KRNAAVDKAQYDKRNQVHLSFIGLAVKVLPEQA-----  
---  
RMRPQLNLAGKTDKKIVKCLNNGLDDEYGKLGRRRIKPLTIKSVYDVEHREATELVKLMPYKDDVEG  
RKSQFAEK--  
AIFEPLRAFMMFLFNYIARAVYALSLRVVRRRTILLVKCKVVVNANTVLSAIIIGVSIRLRHKTTNVADTKH

HIKTIEARARLTLAGAPAAKLNLRPGKIGKKGGRIGKGYMPYKNYNIFDGLASGRRAATKELAKLKKVDKT  
IEVGGIRTRQ-

GGRLPQADLSNAIANTRVGVDIVGENEQEESNPRANAEMGQVFAAIDARVYHLVAALIGHALEAVL  
ALCAIWGIGKAHALLAD--RVNAGIEFHSA-VETAVAAA-

FAQPAGEATVIADVSESYLGALALTDASLDVLRRLRRRQLG-----  
-----

RFGIKAKGHYKGERAMMQITPTKPVKVWVPVFAEDELAPIRAFATNGDGITVVKLTTDIKITMFEK  
GVASLAVTGKSTTVVYTVLEKVTTELAKDIIYEQRAKAHYGRGRLRSHVVTHTKQKRHLSMIKRTVVAKP  
RMEAARLTDGEVTVITGATMAFVMSEQDAV--

GDVDMHFHEEPRREADLGIAGPETFLSTEQPRVLALLFLREYLIHIVEIDTVGGYNDAATYELLRAMEN  
KLDRKLSAEIAKVRMCLHDDVADMGIRQEAPRREQAGDSILSAYWINGVTANADIILLVANLTCATAP  
ENIDCAVRLFYQRVTLQAKERGGDVSVLIPAKNQIEAAEGTVIYTIKGENPGTTQMMLNVEAISKSIVK  
SLAVQLYQVDLFINDTWIATLLRAADDVVYVEASEGREAVDHVIERDTELEMAPQKDIIRRKIRIYTPAA  
PSAVVIWDPAIDRE-----DISCFTDIGAEPKIESLKAWDEKEKYVVHRDDIPPDI-

TMVGKSAHVNKEFGIPDVEVCAPAKPGVTESIDRGEPAKAGTCGEVANLPYPQESLVNRVSSANVQKN  
ISMVLGGNPVGEMGISREVERHLETNMCEIFVDKDDVDVALDFYRLDLT-

LRVGLDRPNAKVEVDGKESRKLMAVLDGEADLQRHPKVSEAAGTRVGAGRKARLPDDTLIFDGV LH  
GDLSFTATDLPEGRV-

VTPVTIKVKAQLKIDKVILKTFHVVTLSFSSQKGEELIKLRLNALKKSTRHYEMLLKIRDTECAQSPHAIP  
VGKILKIDKLLQTICEAHYNEIEPLLADDLTALGVKGDQGLLHTVPRMLAVMTLWGLEAALTHPRWG  
LMARRLVTDVTMGLTMRERHWY-ALSEVVGNTFFARTKDDDEQRLHARNPI-VLL-YGKFGMT-  
ISPSGLKLESTATTAAEHGNDILLISAERLQDDMSYFVLRVLLVFVDEIILGYGSGDDPIKFLVAEQAVT  
GRANPQLVCLTRRTFPLDCQRDVVFLVFEDSTMKNLSHKKMHMNLVLIKSGWIVNVSTKILISDQ  
AIASYAEDAGAHTQPSESALAAITSRVIPIVLVVSQKPAAPSKTMFLEALNLYDQVTTTVENRPKRYI  
FEGDLISVLPIDAAVLKGMQRPQPDRLRRAVVAAAIRLAIAGLASGVLCLLEAGLLNFARAVTPAVRV  
Y--SEAAMSLVVPLPSV-----

>GCA\_000153745

AVIKPVVMNKYAPVLMIAQSEVATVSGAGSPSLRAKTVYAKSGLHRKTKTKWVAGPLYF-  
GVLKSASIVQLISISVDQRAVCTVAQLVEQTVVVHGIVAFDVVKKKIALEEIGGMTSEDPKAVTEYEEEV  
DLNRLREAEDRADLLSVMLGLTLAIKFDHPQPMVSDLPVPVIEVI-

GIMADKGGIDVNDCSISTEISDVDPYVSPMDLSAVAGDSISYLDQESAVAAAKDLIDLEEFCLSESVI  
VGIDPLILPI-FADDAGTTMSFANRSRELKTIVDLAVSNYEKGRARIDD-IASSM-

LNKLLSEALCEKRGTAEEIRLVKRMQQADGLSNNPESILEDNSEGNNSNWAGMIYDDPVSNSSESAS  
AGNIVVAANKRQATERSITFLRKTEISDQAEAPLMRGVKHNAKSRRSRKINDAIIELNFANVPLGIAIRA  
ESNLHKDTLLHDALEKEQLLM-

VIKFHITWKTAIFILIIFIPGNIIGIIEGGIASIGRKQAGLNRHHKLNGSLIEQRPIMEKMTLRLRASLKQKLG  
KDQVIFVVKVAGDLIGNAKVQM-

GGLVGAVVALQGPIYVRRHRQTLVTDSEATVEVLRGVAEGPADAKVLLRIRVSHTIVEVTVLLIPK-  
PVLVDSATIREGVGKTLQIIQLDVYLIRDMGTGSETVAKSTSREMLRDVLLIDAVTGVRLAYGEIKERSN  
KLVSLKDLRTL--

LALLKGTTEPRMENLAEGVCRAFIVAGPEAAVGTLFIIQDDAGKIYTVGDGLRENTKTVKALISLVDAKS  
PKILSAIYSITKLKIRYAVCMVLIAEVNLYSYQEERKQILRMVAKYITQEKKRRQLVIFALS LKGGHKKARA  
SLNILIAAAIESQAENGKVHHEEPEVLLDDAEIVGSSIMVSRQATLSIKDYIKIDVIVVFPEFQEKMVVSL  
RFFCTEVSIFVIALICTVGEMLNREPNSAQENGAGYQKRIRKQSLLFALS VLFEARNLNDA-

TKDLFLNLGLFDPYGIYKNQPKKKQMPSEPDKEKVNNGFELVNAINADNSDNHVLMEGEAMALAVE  
-DATINVSAGVLALNGGMTGVERVESKRKYSIAAEKWNISKINMLDLTISGANPVRCTN-  
IELADVTAALDKKSLLK-----

-----  
LHALNPDAVLVAVLVTPAVGRVAATSEVVGAQVPCDYSL-  
KELQKSKSSEVLAIISGIKIVTLNSARAMIDEDIFVATKVAAKLLKITARETIFSILMNDSEACIPWRLSVAE  
RLEADMARASGYAARPFQTKPSLCETQAHFKLAESIKEIAAGYVAMEKKFVYPVEGIAIQLILDGPHSR  
VGDSKRAGQGHLHEMAKELYVKAVLMIKANPATDTEGIARYMTTNQPTDLLFPESLDIVIDMRRMSV  
V-----IQLNSI-

HFVVPGTSEIAAFQIMAAAAASGLVQIEQVDDRTGPRTSMWMYGAMEELWTFSVTYAGWISNCKI  
GIIILNVYAQELNRAFSLKRLQLDGWPKEAERWWNTWQLWLNKDGFFGYQAAFA-  
KRVLKAELYDYDMSDTEGVSRLSRQQRLRVGYRIREQVKYNKLTKRSDILLQANTRLSIRHELALVSVLI  
IRDIISEFLVVVAMEDVAMGHVECVLADKFDTEKSASIGPAGLRTPDIYGDGTVLKEALLGKVSLANT  
VSNFRYLLLEDGGRELKVSWIDF-

NMIYIRIWLPPAEAALKNLQPICFFLSHPELDLLLQTSIFSGISKARANKLMASALVEEILEDLARFAKPEA  
TMHQSPKNEHFRYYGEEVEPVFLAYILELFALVSTQVTVSDRLLKDRYVLNLKVFRSITSLSWVGVNIVD  
KGPAATVITVGTVSGLGALVLFILL-RLSVLIETLFFRYVY--

MLGYQAAKDVAADAFPEHFTPMAAITRDLEWIEVIPAFFYFSTAK-  
FEPFNTAVAREFFGLFNQRLRIIEVIVPPERVLELVEFVALAGTLPTASDVLPGIIAFE-  
CEPNAASVMEASQDYNLHRHLGITMAFFEARASVKGYFDKGLHKNVAEIGLKEAGALTDPFHGGAD  
AKRCVPVHRILDGLIEAALIEIDSAVLVGDSQKLADQPTSRDKSVGAIGGVILAGTMNMGLAMNA  
CERTDDMLIEEEEGYSAING-

KSDEKLTNKILMVISLAIFPVIEALASANSLNKGVFDSLIDRPNSADNLDHGGEMVIPAPTIFAETAVLYA  
EDEIDKLSWIAGLHLLGTLHAVLQFEPDFIGFISMMINASLEIMETAEVLLDDYHVLEKGRPPKFRVVLK  
GLHIRILSAIDTIIVGSAGRGEITAYIQEDAVPISLNKKSFLPAFSASSCISVDILSTMLRPPERSIPTLILET  
VAEI-

LEVTRGEVEKLERLFAILPGLDLNDLLTLLSYAKDFANIVTINAAITAILSVAEEVLRDLLLLLAEIAISSL  
AMAIALLMLIRDWGLSQKEKNRENQLKEIIQGGVILNVRAEEDIVLSAVSEKVRLGTDEGTTSSFASLN  
LATVSDGFYVLSSAVLQMSSDLMMIIEVQRVLADKEAKNALVVSHPQVKTQPTYAEGSPGMVLQTL  
TNHIPPLAIRPQNIELLWTLVAALWKVKAHIREAARPIIERVLILSVSLIIVLLQSEGGGIGGG--  
GPKPKIIAASFILTIKAAVGDQVRKVARRVMELNNRLGKPEENVTPEFRGAELEQMKYEAKSVEVDCTE  
TIRRFVDIPFLVSIRTQHNESEDGRSMVLDVIRVRFIDL-

VTKKSEILVERAETDGVISREMQLDLQALQAEFVALGKVAFLQHFIALSDGHISNYVTATIHSALGMLL  
LVLFMQQVRVSKVWWPNRRETTMVFIMATLAIFFGAIGLIISLVFVLSGISPLQITTLVLGEGVMAVKQT  
STFPGDS-

VTILQNTYAKLVCAGRVSKADIEASLHIVVAARVARGTWYIYRYEISQAQDQSGIMQRSFRQATLSK  
SLISGRMETKVKVLTAADRYA-

THEIKGGQHRKGRYRNRVKVGHNIPVEVIARIKMAFVDPNLVLVKTGAVVQKRYAQPLTHVRHGAV  
TIGPMEVASPYIGSKKSRHAPGDSAVDLKPDNIVRSVAVVVELIWARENEDNSAVHDKYVTKTHKIAA  
KRNTAVDKAQYDKRNQVELSFIGVAVKVLPEQAIVTATAGTLMPTETVTVTEGLKGVAATIRLDPMEK  
TLIAYIKKMRPQLNLQNKADKKIVKTLNNGLDDVEYGKLGRRKIKPLTIKSVYDVEHEEATELVKLIPYKD  
DVETRLSKFAEK--

ALFEPLSAFMMLFGYIARAIYALSLRVVRRTIILVKTKIIVNADTVLSAIKFIGVSIRLRHKTNNVAETKHHIK  
TIEKRARMRLAGAPNVKLNLSPGRIGTKGGRIKGYMPYNNYNIFDKLESGRRAKVAELAKKKVDKEIT

VSGVRTKQQGGRVSVEQLSNALPETRVGVAIIGENYQKESNPRANAEMGQVFALIDAKVYDLVGRLK  
GHALKAVLAIVVWVGKCHSVLAVSFRMNAGIELHCAA-IDEAVACA-YAQSAGEA-  
IIADLSEGDANELGLTTQTLETCCRARRKRLSELKTKKEAYMELTCFSGKGEKVKIEASQTQAYEVLSTR  
TAERFGIKAKGSFGKERAMMQIVPTKPVKVVVPVVFVSEAELLAPVRSFAETNGDGVTVVKLITDVKVT  
MFEKAIASLAVEGKVTTLVYTVLEKVTEVMRDIIYQQRAKAHYGRGRLRSHVVTHTKSKRHLSLMRRT  
VVVDLSMEAARLVGGEVSVITSATIAFVMAEQESV--

GEVEYHFHNEPRNEADLGIAGNETFLATEQPRLLCILFLRAYLLHIVDIDTQGNFAESATIIDILRAMSRK  
LDQRLSADIATRMLCLSDDLPMGVMREEAARRDSAGDIMLSSYFLNGVTANADIILLVANLELKTVP  
NIDKAIRLFYQRITLQARERNGDVSVSIIIPAANQIEAAEGTVIYTIKGTKPSSQMMLNIEAISRSIVKSLAV  
QLFQVNLFLNDTWIDTLLRTAIDVAFVDAKDGNEAIDHVLERDEGTEMAPQKDIVRRLVRIFTAAPS  
AVVIWDPAIDRTDKAEAQGTILKIYGPLDQDIACFTDIGAEPKIQSIKSWDEKEYVVRDDIPEDI-  
TLVGKSSAVNKEFSIPDVAVCAPNKP GITESIDRGEPKAGTCGEVANLPYPQESLVNRVSSANVQKNIT  
MVLGGHPVGELGISRSVERHLETSMCDIFIDKDNVDVALSFFVLQLTTFRVGLDSPNAKIEIKGESRKV  
MAVL DGEANLQRHPKISEADGI-NKAGKRAKMDDDSLIFDGVNHGDIKFTSTDLPHGRV-  
VTPVIHNVKAQLEIDKVLLKTFHVVTLAFSNDKGEEHLAKLRLQALKKATRHYEMLVKIRETECADSPH  
AVDVGKILKIDDLMTICQSHYTAIEPLLAQDLTALGVMGQQGLLHIVPRLMILSVLYLWDIEAQTIEN  
WDLQASALVTDQTLGLAFRERDWSF-AISEVINNTFFARSAQDETEQRLHARNPI-ILL-  
YGRIGLLVISPSGLRLDSTGPTKLGEKNSSSVILSNERLQDSMEYYVLALLLVFVDRVILVFGSGKDPLKFL  
VAEQAVTGRANPGLVCLTRRTFPMELQRDAQFVLVDDSTMKNLSHKKMHMNLVLIKSGWVENIS  
TKILIADQAIASYAEDAGAHTQPSALAIVTSRVMAPIVLVVSQKPVAPSKTCFLEALALYDVTATVQ  
KKPKKYYIFEGDVSVLDKVDASVLKGMQRPYPDRMRRAVTADAIKLAIAIRASDCFDQLEAGIINFSR  
SISLAAGVYALISII-DDPVN-SALSFRVLAHKTSTKNDRPYKAHTKFLHKADATKALIADGVDTLA  
>GCA\_000154745

AVIKPVS LNTYAPVLMIRQQEVATVSGAGSPSLRAKTVFRKSGLQRKTMTKWVKS KLYF-  
GVLKMGNIVQLVSISVDSRAVCTVAQVVEQEVVHGLVALDAVKRKIALEEMDGMTTEDPAKVAEFE  
AELDLKRFRDADARADMLPVMLGLTLEIRFDPHEPVVHDLPIPVIFEVI-  
GIMADKGGIEVDGCAISNAVSDVDPISYVSPIDLA AVAGEQMAFIDQEA AVAAAREAITLEELALEAGI  
LVVGISPLLLPV-FGEDGGV-MSFAARSRTLGSIVALAVAYEELTRA-IEA-IASEM-  
MQAAQAEALAEKRGTAEEIRIVKRMQRSSGLADDADLVILEDAAEGNSSWAGQIYDDPISGSSES  
AGNIVHAANKRQNFARSITFLRKAESDKAEAPLMRGVKHNSKSRTARKLDDAIMELNFPNVPPGIAIR  
ADAGKSADRLHDATEQEILMIVVRWHVTWKTAIAIGLVLTAGDIVGLMELGGIAAVGKPDGALNR  
HHKLNGSLIEQRPIIEKMTLRLRASLKEKLGKDQIIIFVVKVQGD LVADATI QMG-  
GPVGAVVAIQGEVIFVRRHKQTVITDQDATV-VLKGVAEGPADAQALLRIRVSHTLVDLSVLLIPE-  
PVLVDSVSIREGVGKALQIIQLDVYLLRDMGTGEETLAESKSRELIREIFALDPITGVRLAYGKLKERMGK  
KLALKELD-----

RSILEAVTEPRMENLPAGVCRTFITAGPRAAVGMLFLLDDGGKLYSIDGDMRELPSVKS LIGLVDTK  
APKVS LAGYAEERLRIRFADCEVLVTEADLYAYKEERRELLRMVPVYIINEAKRRQLIMFALS LKGGHRR  
TMMSLGVMIAAAIIESQAEKGTVHHKAPQVLLDDAEVVGTAIMISRQSALDLKQMVKVDIIVLFPEFQ  
EKMVVS LKFFCTEVAIFVIALITTVGEMLSREPEHAQESGAGFQKRIRGHSVLFALA AVFDRTNLRDA-  
TPDVFLSLGLAEARYGVLYTNQPKKKQMPSEPDPGDRVDGFELVHAVKEDGSS-  
QELEMPEAMALAVEADATINVSAGVLAMNGGMVAVEKVDSKRKVALAATKWSIAKLDVVDITISGA  
APIRCCG-IEMADISAALGQKKV-  
FLFLPGASNAELEEEKLDGAGASTADAAEDKQLSILLVKPVLVVIQDSNSAGLISNGGLDEWGTMAYK  
KHYSFAARMRLHMRITD-----MEPNKQKSEKVKT VKLEGDTRFRQLAIEGVKEQMP-

LHALNPDAFV-LPLLTPAVGSVAADERVLGADVPVDASL-  
RELQKSQRGSALPITAIRLLEMRAARGMIEEDIMVAGKVAA-  
LFKVRALETIVDLLLRNDTEATLPWRLSVAERLEADTKRASGFAARPFKSKPSLCKTQAHSKIADPIQEIA  
AGYVAAEERFVFPVEGIDILILANPHSRVGTAKRAGEGHLHAMAKELLGKAVVMLRNEPNTNTEGLL  
NYLTNNQPTDLLFEDCLDVIIDIRMSVV-----  
VHLNTI-  
HVVPSPVRDVAAFTIMSATFPSGLIQVEQVDDRTGREKTLMWMYGAMEELWLNSVRWADWVANC  
AIGAILHVYAQTINRAFLKRLQLDGWPKAARWWNTWQLWLNKDGFGYGYDAAFR-  
KQILKATLADFDMDKDEGVGRMLSKQEIRAGYRIREQVEYARLDPRTDILLQAKTRLSIIRHALTVVAILI  
LRDVAPEFTVVVAHEDVARGHVECVLAESFDFTEKDAHIGPVGLRTPAGIFGDGTVFKEAVLGKIDLA  
NTVADFRYLILVDGGRALGVCWISLTNLLYTRIWLPPAQADLKDLLPICFFLQHPDLKMTTHHLFAGIS  
KARAEQLMAGALVEEILEGIARFADPEATTHQSKKAKHFKYYGEEVDPVHLAYILDLFALVSTQVTVSD  
RLKDRYVLNLKVFRGLTALLWLSLQLAEKGPSATVITVGTIAGLGALVLFILLMRDSVLVETLFYRYVY-  
VMLGYEAAKDVQDADPEHLGPLAAASRDIEWIEIIPAFFYYFKTAK-  
FEPFNTAVAREFFGLFKERLRIVDLAVPPDRVEAFVQFVALAGTLATSAQALVGVIACGLCEPNAAAV  
LEAERDWNLHRSMGITLAFYDARKSVKGYFDKGLHKDVAEIGLREAGALTTHFHCAVEAKRVAPAVH  
RVLDLGEIEAGLIEIDSAVVVADEEQTLADKPTTRDKSVGAVGGVVLGTMNMGANLDSVERGGNIII  
ELEEDQYHAVNGKKADGKLTDKVLMVLSAAYFPVITRFSSANALDHGVFGLLIEAPSDADNLDHGGI  
MTIPAPTVLTETTPLYAESDIDRIAWIAPMHMLGTLPAVLSFEPDHYSFISMMIDASLEIMETAEVLDY  
HVLEKGARPSAFRVILIKGLHIRLLAAVGTLVVGSGAGRAEVTAYIQGQAVPITLRKHTFLPAFSASSCKV  
VDIFSTLLRPPERSSVQMLILETVael-  
LEVTRLTNEKLERMMILLPGLDLAALLGLLAAAEFATIVTLGAAITAILSVAAESVVLREMLLTkAEIAIT  
ALAMAMALLMLTGDEGLTQKWVGREAQMKELIQAGAVLQIHADDAMVLAATADKVRDLTDEGT  
TSAFASLNLATVSDGFYVLSSAVLQMSSDLMMIVSVARVLADKESKNALVVRHPEQVKTQPTYAEGS  
PGMVLQTLTECIPPLAVKPEEVELLWTLVAALWRVKAHLANAARPHNERVLILLALGLIVVLLQSEGG  
GMGGG-  
MGAAAKILAAFSILTlKASVGDEVrkVTRRvMDLSSRLGRPEEAVNPEFKGEELDQTKYEAENVEVDC  
METVRRFVDIPFLVSVRTQHNESEDrgARLVLDVTRVRfIDL-  
VTKRSDVILVERVETDGIARQMAKDMQSLHPEAAALGKISQLQHfIALGDAHISNYVTAQTHSVLGM  
LLLVLFIQQVRVSKVWVPTRRVtmVfVMAALAVFFIVIGLGINLVfMVGGISPLQITTLVLGEGVMAV  
RQVSTFPAES-  
VVILQNTYADLICAGRVTKADIESSLHIVVGARVARGTWYVIYHYEISQAQSPSGILQRAFRQATLSQSL  
IDGRMDVKIKVVTSDRYA-  
TYEIKGGQHRKGTRYNRVKVGHNIPVELLARVKMAFGDPNLVLVKTfGAVVQKRFAQQLTHMRHGA  
VTIGPMEVSSPYIKSKKARHAPGDSVVDIKPDNVVRSAVVPELIWARENEDQSAVHEKYVKTTHKIA  
AKRNRAVDKAQYDKRNQVHLSfIGLAVKVLPEQAIV-  
ATAGTLLPTESVAVTENLKGVAATIRLDPMEKTLIAyIKMRPQLNLGGKTDNKVVKCLNNNLDDVEY  
GKLGRRIKIPITIKSVYDVEHKQATELVKLMPYKDDVEGRKSQFAEK--  
ALFEPLKAFMMIFGFIARAVYALHLRVRRtILLVKTkIVVNAENVLSAIKIIGVSIRLRHKSTNVADTKHH  
IKTIEARARMTLASAPSVKLNLRPGRVGKKGGRIKGYMPYKNYNIFDGLSSGRRAKVKDLAKLKKVDKT  
IAVDGIRTRQ-  
GGRLPKAQLSNALANTRVGVDIVGENVQEASNPRANAEMGQIFAaIDARVYSLVAALIGHALEAVLA  
VCAILGIGRAHALLAVY-KMNAGIELHSAA-VAEAVAAA-YSQPAGEAAAL-  
DVSEYPLRALAVTDQSVdVCRLRRRQLGELKKTkKEAYMSLTcFSGKGDKVKIVDATQTQfYEIVATRT

AERHGISA KGTYGKERAMMQITPTKPVKVWVPVFNDDPELLAPVRAFAETNGDGIDVVKLATDIKVT  
MFEKGVASLAIAGKATTVVYTVLEKVTESKDIIYEQRAKAHYGRGRLRSHVVTHTKQKRHLSMMKRT  
VVADPSMDAARLTDGEVSVVTGATMAFVMSEQDAV--  
GDVDMHFHEEPREAPLGIAGPETFLSTEQPRLLALLFLREYLLHIVDIETVGNFADAATIYDILRAMQA  
KLDRKLSADIAKVRMCLTDDVANMGVTDVAARRDSAGDSILSAYWINGVTANSIDIILLVANLECKTA  
PENIDCAVRLFYQRVTLQAKERGGDVSVELVPAKNQIEAAEGTVIYTIKGNPSSVQMKNIEAISRSIV  
KSLAVQLFQVDSFLNDTWIATLLRAAAKVVFVDAREGKEAVDHHVVERDTALELAPQKDIVARKIRIFTP  
AAPSAVVIWDPAIEREDKADAQGTILMIYGPDLQDISCFTDIGAEPKIESLAAWDEKEKYVVHRDDIPE  
DITTLVGKSSKNKEFGIPDVAVCAPAKPGVTESIDRGEPKAGSCGEVANLPYPQESVNVRVSSANVQ  
KNISMVLGGHPVGEMGISRGVERHLETNMCEIFVDKDDIDVALDFYKISLTPLRVGLDKPNAKVDIDG  
KESRKLMAVKDGDANLQRHPKVSEESGVR-KAGEKAKLPDDTLMYDGVQHGDISFTATDLPEGRV-  
VTPVFNAVKAQLEIDKVMLKSFHVVTLFSFNDKAEHLVKLRLNALKKSTRHYEMLLKIRDTECAQSPH  
AIPVGKILKIDSLLQTICKAHYTAIEPLLAEDLTALGVMGDQGLLHVVPRLMIL--  
LHLCGITAQMAMAQWTLQQNAIVTDQTMGLSVRERAWSF-  
AISEVTGNTFFARTKDDDEERLHARNPI-VIL-YGKEGML-  
ISPSGLKLSSTNPTDANHGNADQLILSGERLQDTMSYHILQILLVFDQMILAWGSGDEPLKFLVAEQ  
AITGRANPQLVCLSRRTFPLDLQRDAVFVLVLEDTTMKNLSHKKMHMNLVLIKSGWVENVSTKILIS  
DQAIASAEADAGAHTQPSALAVITSRVIPIVLVVSQKPAAPSKTLFLEALNLYDEITATVLKRPKRYFI  
FEGDVVSILDRMDAAVLLGMQRPQPDRLRRAVVARAIRLAIALRGSGILAQLEGGALNFSRAVNFAE-  
TYPGLEAALATAIA-SALEFRVRNHKTSTKRDRPYKGHTKFLHKAEDAKALVAEGVDTLA  
>GCA\_000154765  
AVIKPVSLNTYAPVLMIRQQEVATVSGAGSPSLRAKTVFRKSGLQKRTMTKWVKSPLYF-  
GVLKMGNIQVLVSISVDSRAVCTVAQVVEQEVVHGLVALDAVKRKIALEEMDGMTTEDPAKVAEFE  
AELDLKRFRDADARADMLPVMLGLTLEIRFDPHEPVVHDLPIPVIFEVI-  
GIMADKGGIEVDGCAISNAVSDVDPISYVSPIDLA AVAGEQMAFIDQEAAVAAAAREAITLEELALEAGI  
LVVGISPLLLPV-FGEDGGV-MSFAARSRTLGSIVALAVAYEELTRA-IEA-IASEM-  
MQAAQAEALAEKRGTAEIRIVKRMQRSSGLADDADLVILEDAAEGNSSWAGQIYDDPISGSSES  
AGNIVHAANKRQNFARSITFLRKAESDKAEAPLMRGVKHNSKSRTARKLDDAIMELNFPNVPPGIAIR  
ADAGKSADRLLHDATEREQILMIVVRWHVTWKTAIAIGLVLTAGDIVGLMELGGIAAVGKPDGALNR  
HHKLNGSLIEQRPIIEKMTLRLRASLKEKLGKDQIIIFVVKVQGD LVADATI QMG-  
GPVGAVVAVQGEVIFVRRHKQTVITDQDATV-VLKGVAEGPADAQALLRIRVSHTLV DLSVLLIPE-  
PVLVDSVSIREGVGKALQIIQLDVYLLRDMGTGEETLAESKSRELIREIFALDPITGVRLAYGKLKERMGK  
KLALKELD-----  
RSILEAVTEPRMENLPAGVCRTFITAGPRAAVGMLFLLDDGGKLYSIDGDMRELPSVKS LIGLVDTK  
APKVL SAGYAEERLRIRFADCEVLVTEADLYAYKEERRELLRMVPVYIINEAKRRQLIMFALS LKGGHRR  
TMMALGVMIAAAIIESQAEKGTVHHKAPQVLLDDAEVVGTAIMISRQSALDLKQMVKVDIIVLFPEFQ  
EKMVVS LKFFCTEVAIFVIALITTVGEMLSREPEHAQESGAGFQKRIRGHSVLFALA AVFDRTNLRDA-  
TPDVFLSLGLAEPRYGVLYTNQPKKKQMPSEP DGDRVDGFELVHAVKEDGSS-  
QELEMPEAMALAVEADATINVSAGVLAMNGGMVAVEKVDSKRKVALAATKWSIAKLDVVDITISGA  
APIRCCGNIEMADISAALGQKKV-  
FLFLPGASNAELEEELDGAGASTADAAEDKQLSILLVKPVLVVIQDSNSAGLISNGGLDEWGT MAYK  
KHYSFAARMRLHMRTID-----MEPNKQKSEKVKTVKLEG DTRFRQLAIEGVKEQMP-  
LHALNP DFAV-LPLLVT PAVGSVAADERV LGADVPVDASL-  
RELQKSQRGSALPITAIRLLEMRAARGMIEEDIMVAGKVAA-



LFKVRaletivDlLLRNDTeATLPwRlSvAERLEADTKRASGFAARPFKSKPSLCKTQAHSKIADPIQEIA  
AGYVAAEERFVFPVEGIDIQLILANPHSRVGTAKRAGEGHLHAMAKELLGKAVVMLRNEPNTNTEGLL  
NYLTNNQPTDLLFEDCLDVIIDIRMSVV-----  
VHLNTI-  
HTVVPgARDVAAFTIMSANFESGLIQVEQVDDRTGREKTLMWMyGAMEELWLNSVRWADWVAN  
CAIGAILHVYAQTINRAFLQLQLDgWPKEAARWWNTWQLWLNKDGFYGYDAAfRA-  
KQILKATLADfEMKdVEGVGRMLSKQeIRAGYRIReQVEYARLDPRtdILLQAKTrLSiIRHALTVVAILIL  
RDVAPEFTVVVAHEDVARGHVECVLAESFDTEKDAHIGPVGLRTPAEIFGDGTVFKEAVLGKIDLANT  
VADFRYLILVDGGRALGVCWISLTNLLYTRIWLPPAQADLKDLLPICFFLQHPELDL-----  
ISKARAEQLMAGALVEEILEGIARFADPEATTHQSKKAKHFKYYGEEVDPVHLAYILDfALVSTQVTVS  
DRLLKDRYVLNLKVFrgLTALLWLSLQLAEKGPSATVITVGtiAGLGALVLFiILLMRDSVLVETLfRYVYV  
-VMLGYEAAKdVQDADPEHLGPLAAASRDIEWIEIIPAFFYYFKTAK-  
FEPfNTAVAREffGLFkerLRIVDVLAVPPDRVEAFVQFVALAGTLATSAQALVGVIACGLCEPNAAAV  
LEAERDWNlHRSMGITLAFYDARKSVKGYFDKGLHKDVAEIGLREAGALTTHfHCaVEAKRVAPAVH  
RVLDLGEIEAGLIEIDSAVVVADEEQTLADKPTTRDKSVGAVGGVVLAGTMNMGANLDSVERGGNIiI  
ELEEDQYHAVNGKKADGKLTDKVLMLVSAAYFPVITRFSSANALDHGVfGLLIEAPSDADNLDHGGI  
MTIPAPTVLTETTPLYAESDIDRIAWIAPMHMLGTLPavLSfEPDHYSFISMMIDASLEIMETAeVLDDY  
HVLEKGARPSAFrVILIKGLHIRLLAAVGtiLVVGSAGRAEVtAYIQGQAVPiTLRKHTfLPAFSASSCKV  
VDIFSTLLRPPERSSVQMLILEtVAEL-  
LEVTrLTNEKLERMmILLPGLDLAALLGLLAAAEfATIVTLGAaITAILSVAAESVVLREMLLTkAEIAIT  
ALAMAMALLMLTGDEGLTQKWVGREAQMkELIQAGAVLQIHADDAMVLAATAD-----  
-----  
IVSVARVLADKESKNALVVRHPEQVKtQPTyAEGSPGMVLQTLTECiPPLAVKPEEVELLWTLVAALW  
RVKAHLANAARPHNERVLiLLLALGLiVLLQSEGGMGGG-  
MGAAAKILAAFSILTlKASVGDEVRKVTRRVMDLSSRLGRPEEAVNPEfKGEELDQTKyEAENVEVDC  
METVRRFVDiPFLVSVRTQHNESEDRGARLVLDVTRVRFiDL-  
VTKRSDVILVERVETDGiARQMAKDMQSLHPEAAALGKISQLQHfIALGDAHISNYVTAQTHSVLGM  
LLLVLfiQQVRVSKVWPTRREVTMVfVMAALAVFFiVIGLGINLVFMVGGISPLQITTLVLGEGVMAV  
RQVSTfPAES-  
VViLQNTYADLiCAGRVTKADIESSLiHVVGARVARGTWYViYHYEISQAQSPSGiLQRAFRQATLSQSL  
IDGRMDVKIKVVTSDRYA-  
TYEIKGGQHRKGTRYNRVKVGHNiPVELLARVKMAFGDPNLVLVKTFGAVVQKRfAQQLTHMRHGA  
VTiGPMEVSSPYIKSKKARHAPGDSVVDiKPDNVVRSVAVVPELiWARENEdQSAVHEKYVKtTHKIA  
AKRNRAVDKAQYDKRNQVHLsfiGLAVKVLPEQAiV-  
ATAGTLLPTESVAVTENLKGVAATiRLDPMEKtLiAYIKRMRPQLNLGGKTDNKVVKCLNNNLDdVEY  
GKLGRRKiKPITIKSVYDVEHKQATELVKLMPYKDDVEGRKSQFAEK--  
ALFEPLKAFMMiFGfiARAVYALHLRVVRtILLVKtKiVNAENVLsAiKiIGVSIRLRHKSTNVADTKHH  
IKTiEARARMTLASAPSVKLNLRPGRVGKGKGRIKGYMPYKNYNiFDGLSSGRRAKVKDLAKLKKVDKt  
IAVDGiRTRQ-  
GGRLPKAQLSNALANTRVGVDiVGENVQEASNPRANAEMGQiFAAiDARVYSLVAALIGHALEAVLA  
VCAiLGIGRAHALLAV-LKMNAGIELHSAA-VAEAVAAA-  
YSQPAGEAAViLDVSEYPLRALAVTDQSVdVCRLRRRQLGELKtKKEAYMSLTcfSGKGDKVKiVDA  
TQTQfYEiVATRTAERHGISAkGTyGKERAMMQITPKPVKVVVPVFVNDELLAPVRAfAETNGDG  
IDVVKLTtDiKVTMfEKGVASLAIAGKATTVYtVLEKVTELSKDiIYEQRaKAHYGRGLRSHVVTHTK

QKRHLSMMKRTVVADPSMDASRLTDGEVSVVTGATMAFVMSEQDAV--  
GDVDMHFHEEPRREAPLGIAGPETFLSTEQPRLLALLFLREYLLHIVDIETVGNFADAATIYDILRAMQA  
KLDRKLSADIAKVRMCLTDDVANMGVTDVAARRDSAGDSILSAYWINGVTANSIILLVANLECKTA  
PENIDCAVRLFYQRVTLQAKERGGDVSVLVPASNQIEAAEGTVIYTIKGNNPSSVQMKLNIEAISRSIV  
KSLAVQLFQVDSFLNDTWIATLLRAAAKVVFVDAREGKEAVDHHVVERDTALELAPQKDIVARKIRIFTP  
AAPSAVVIWDPAIEREDKADAQGTILMIYGPDLQDISCFTDIGAEPKIESLAAWDEKEKYVVHRDDIPE  
DITTLVGKSSKVNKEFGIPDVAVCAPAKPGVTESIDRGEPKAGSCGEVANLPYPQESVNVNRVSSANVQ  
KNISMVLGGHPVGEMGISRGVERHLETNMCEIFVDKDDIDVALDFYKISLTPLRVGLDKPNAKVDDIG  
KESRKLMAVKDGDANLQRHPKVSEESGVR-KAGEKAKLPDDTLMYDGVQHGDISFTATDLPDGRV-  
VTPVFNAVKAQLEIDKVMLKSFHVVTLSFSNDKAAEHLVKLRLNALKKSTRHYEMLLKIRDTECAQSPH  
AIPVGKILKIDSLTQTICKAHYTAIEPLLAEDLTALGVMGDQGLLHVVPRLMIL--  
LHLCGITAQMAMAQWTLQQNAIVTDQTMGLSVRERAWSF-  
AISEVTGNTFFARTKDDDEERLHARNPI-VIL-YGKEGML-  
ISPSGLKLSSTNPTDANHGNADQLILSGERLQDTMSYHILQILLVFVDQMILAWGSGDEPLKFLVAEQ  
AITGRANPQLVCLSRRTFPLDLQRDAVFLVLEDTTMKNLSHKKMHMNLVLIKSGWVENVSTKILIS  
DQAIASYAEDAGAHTQPSESALAVITSRVIPIVLVVSQKPAAPSKTLFLEALNLYDEITATVLKRPKRYFI  
FEGDVVSILDRMDAAVLLGMQRPQPDRLRRAVVARAIRLAIALRGSGILAQLEGGALNFSRAVNFAE-  
TYPGLEAALATAIA-SALEFRVRNHKTSTKRDRPYKGHTKFLHKAEDAKALVAEGVDTLA  
>GCA\_000154785  
AVIKPVTQNEYAPVLMIAQSQVATVSGAGSPSLRAKTVYAKSALQRKTMTKWVAKPIYY-  
GVLKMGNIQVLSISVDARSVCTVAQLVEQEVVHGLVALDAVKRKIALEAIDGMTTEDPAKVAQYE  
EEVELKRFRDADDRSDMLPVMLGLTLKIRFDPHQPVVHDLPIPVIFEVV-  
GIMADKGGIEVDDCAISQAVSDVDPIEYVSPIDLAAGTEMFAFIDQESAVSAARDTIALDELALEGSIL  
VVGIKPLILPV-FGEDAAV-MSFANRSRTLGSIVDLAVAFPRLSRA-ITG-IASEM-  
MRAAQAKALAEKRGTAEEIRIVKRMSRSAGLADDPDLVMMEDAAEGNSNWAGQIYDDPISGSSES  
SAGNIVFAANKRQNFQRSITFLRKVEISDKAAAPLMRGVKHNAKSRTARKYDDAITLLNFANVPAGVA  
IRADLRKPADTLLHDATQGEKILMVIVRWHTVWTKAAIIVLMTDAGNIVGMIELGGIAAVGKPDGTLN  
RHHKLNGSLIEQRPIIEKMTLRLRASLKQKLGKDQVIFVVKVQGDVADATVQMG-  
GTVGAVVAVQGEVIFVRRHKQTIVTDQEATV-ILRGVAEGPADAQALLRIRVTHTLVKISVLLIPE-  
PVLVDAVTIREGVGKALQIIQLDVYLLRDMGTGDETALAESLSRETIRDVLAVDTVTGVRLAYGQIKERLA  
KKLTLKDLETML--LSIL-  
DITEPRMDNLPDGVCRFTVAGPRAAVGMIFLLDDAGKIYTIDGDLREVTKSVKSLIGLVDAKAPKVL  
SASYATDRLKVRFADCEVLEAEADLYAYKEERRQMFRMVPVYIVLEAKRRQLIVFALS LKGGHRRQA  
ALGVLIAATLLESQALEGAVNHARPAILLDDAEIVGTEIMISRQSSLQIKDRVKTIVVVFPEFQEKMOV  
SLRFFCTEVAIFVIALIVTVGEMLSREPEHAQEDGAGFSKRIRAHSVLFALAVSFDRRNLRCDQLPDLFL  
GLGLAPPRYGILYKNQPKKKQMPSEPDTDRVDGFELVNAVKEGADNHELDMPPEAMALAVE-  
DATINVSAGVLATNGGMVAVEKVDSKRKMSLAVTKWNISKIDVWDITLSGADPTRALS-  
IELADVSAALSSKKVWFLFLPGASNEELEEAKLDGAGASTAEAAEDRQAPILLVVPVLVVIQDSNTAGLI  
SNGGLDEWGTMAYKKHYAFAARMRLHMRTIDGIEVGVEMNPNKQKSEIKTVKLEGDTRFRQLATE  
GVKEQMP-LHALNADFV-LPMLVTPAVGSVAADAGVLGARVPVDASL-  
RELQKSQKGSALPISAIRILDMRAARAMIEEDIMVAGKVAA-  
LLQITALETIAELVLRNDSEAILPWRLSVAERLEADTKRAGGYAARPFSSKPSLCDTQAHATVADPIQEI  
AAGYVATADRFVFPVEGIAIQIVLSNPHSRVGGAKRAGEGHLHEMAKELLAKAVLMLRNEPDTNTEG  
LINYITTNQPTDLLFEDCLDVIIDMRRMSVV-----

IQLNTV-  
HVVIPGADDLAERKIMAAAAPSGLIQTERVDDRTGRERTLMWWMYGSMEELWLLSVRYADWVTDTPI  
GAILHVYAQVINRAFSLKRLQLDGWPKESRWNTWQLWLNKDGFFGYEAGFRA-  
KQVLKAALADYEMKDVHGVARMLSRQELRAGYRIRQQVPPFARLNPRTDILLQAQTRLSVIRHALAVV  
AILVLRDVATEFT-  
VVAMEDVAMGHVECVLADSFATAKDADIGPAGLRTPDTIYGDGTVLKDAVLGKVDLANTVADFRY  
RMLIDGGRALGVSWADL-NMLYPRIWVPPAQAAALKNLTPITFFLSHPELDLLGA-  
DIFKGISKARAEELMASALIEEILEGVARFADPEATTHQSHKERHFKYYGEEVDPVHLAYILRMFALVAT  
QVTVSDRLLKDRYVLNLTV-RGFTSLLWISIQLSAKSPSATVITVGTIAGLGALVLFILL-  
RESVLLETLYFRYVY--MRGYSAAKDVADADPEHFGPLAAASRDMEWIEIVPAFFYYFATAG-  
FEPFNTAVAKEFFGLFEERLRLVDVLAVPPDRVEALVEFVALAGTLPTSADTLPSVIATDLCEPNAAAVL  
EAERDWNLHRTMGITLAFFKAQISVKGWFDKGLHKDVAETGLSEAGGFTTPFHAGKNAKRCVPVH  
RVIDLGELEAGLIEIDSAVLVADEEQTLADQPTRDNSVGAIGGVILAGTMNMGSSLDQVERGGNIIIE  
EEEQYHAVNGKKADGKITDKILMVLSRAYFPVIERVASGTALDRGVFGLLIQAPDDADNLDHGRALVI  
PASTVLAETTPLYAESEIEKIAWIAPMHLLGTLAAVLGFEPDHYSFISMMIEASLDITETAEVLDYHVLE  
KGARPPSFRKILIKGLHIRLLAAVGTLVVGSGRSEITAYINGQAVPITMRKATFLPAFAASSCKTVDIFS  
TMLRPPERSTIEMLILETVTEL-  
LEVTRLENDKLERILILLPGLDFAVILELAAAANKDFSQIVTIDAAITAILSVAAEKVVLREMLLTKEIAVTAL  
ALAMALLMLTADAGLTQKEAARDTQLTELIQGGVVLQVRVEDRMVLAATADKVRLSTDEGTTSAFA  
SLNLATVSDGFYVLSSAVLQLSSDLMMIVAVSRVLADKETKNALVVRHPEQVKTQPTYAEGSPGMVL  
QTLTACIPPLAIKPEEVELLWTLVAALWQVKSHIASAMRPRQERVILILALGLIVVLLQSEGGGMGGG-  
MGAAAKALAAFSMLTFKASVEDEVKVTRRVMDLNSRLGRPEEAVAPEFRGEELEQNKYEAENVEVD  
CIETIRRFVDIPFLVSTRTQHNESEDRGSRMVLVDVTRVRFIDL-  
VTKRSEIILVERAETDGVIAHQMAKDLQALHPEAAALGKIAALQHFISVNDGHISNYVTAEINSVLGML  
LLVLFIQQVRVSKVWPTRREVTMVFIILAAVFFLVIGLSVNLVFMVGGISVAQITTLVLGEGVMLVR  
QVSTFPSES-VTILQNTYADLICAGRVTKADIEKSLHIVVGARVARGTWYVIYHYEI-  
QAQGPAGIMQRAFRQATLSQSLIDGRMEVKVKVTPDRYA-  
THEIKGGQHRKGRYRNRVKVKNIPVDLIARIKMAFAPPNLVLVKTFGAVVQKRFAQQLTHMRHGA  
VSIGPMEVSSPYIRSKKARHAPGDSIVTIKPDNIVRSVAVPELIWARENEDQSAVHDKYTKTTHKIAAK  
RSRAVDKAQYDKRNQVHLSFIGLAVKVLPEQAIHVHATAGTLMPTSEAVTEALKGVAATIRLDPMKA  
LIAYIKMRPQLNLGGQTDKKIVKCLNNNLDDVEYGKLGRRIKIPITIKSVYDVEHKRATLVKLMPLYKD  
DVEGRKSQFAEK--  
ALFEPLQAFMMLYGFIAARAVYALYLRVIRRTILLAKTKIIVNASTVLSAIKIIGVSIRLRHKSTNIADTKHHIK  
TIEKRARMTLAGGPSVKLHLSDBGVGTGKGRIKGYMPYKNYNIFDGLASGRRAKVLEAKLKVKDKSIS  
VDGIRTRQQGGRIKADLSNAYANTRVGVDIVGENEQUEESNPRANAEMGQIFAIDARVYSLVGALI  
GHALEA--ALCAILGIGRAHVLLAVKLVNAGIELHSAA-VAQAVAAA-----  
-----  
LKKTKEAYMSLTCTGTNGDKIKIVEASQTQAFEIVATRTAERFGIKAKGTYGKERAMMQIVPTKPVKV  
WVPVFNDDPELLAPIRAFAETNGDGVTVVLTDKIKVTMFEKGVASLAVSGKATSVVYTVLEKVTELM  
KDIIYEQRAKAHYGRRLRSHVVTHKSQRHLSMIRRTVADPSMEARLTDGEVSITGATMAFVM  
SEQDAV--  
GDVDMHFHEEPRREAELGIAGPETFLSTEQPRLLALLFLQEYLIHVIDIGTVGNFSDAATIYDILRAMASK  
LDRKLSADIKTRMCLADDVADMGVTELAARRESAGDPILSAYWINGVTATADIILLVANLESKLTPE  
IDCAVRLFYQRITLQAKERGGGVEVALVPAQNQIEAAEGTVIYTIKGTPTSSTQMKLIEAISRSIVKSLA

VQLFQVELFVNDTWLGTLLRAAGDVVYVDARDGKEGVDHVVERDTLLEFAPQKDIVARKIRIYTPAAP  
SAVVIWDPAIEREDKADAQGTILMIYGPDLQDISCFTDIGAEAKIESLASWDEKEYVHRDDIPEDITT  
LVGKSSKVNKEFGIPDVGVCAPAKPGVTESIDRGEPAKAGSCGEVANLPYPQESLVNRVSSANVQKNIS  
MVLGGHPVGMGISRGIERHLETNMCEIFVDKADVDVALDFYRLNLTAMRVGLDNPNAKVEIDGRES  
RKLIQVQDGDADLQRHPKLSEEAGALRKAETKAKLPDDTLILDGVAHGVDVSFTVTDLPEGRV-  
VTPVNNNVKAQLEIDKVLLKTFHVVTLSFSNNKGGDHLIKLRLNALKKSTRHYEMLLKIRDTECATSPH  
AISVGKILKIDSLQITICTAHYTEIEPLMAQDLAALGVMGDAQGLLHVVPRLMILAVLVLYRLEAEGYVPK  
W-TQAVAIITDQTMGLAMRQRGWSF-CISEVVGNTFFARTKDDDETEQLHARNPI-VLL-  
YGKSGMV-  
ISPSGLQLDSTAPDTQGHGNDNALILSRENLDAMSYYVLHVLLVFVDLVILAYGSGDVPLKFLVANQ  
AVTGRTPNPQLVCLARRTFPLDLQRDATFVLVFEDATMKNLSHKKMHMNLVLIKSGWVANVSTKILI  
SDQAIASAEADAGAHTQPSALAAITSRVMAPIVLVVSQKPTAPSKTLFLEALNLLDEVATVNLKPK  
RYFVFADLISILQPIDAAVLKGMQRPQPYMRRAVVAHAIRLAIGLRAAGVLAWLEAGIINFSAVTF  
AG-FYSTIDC-GGGAIT-QALAFVRNHNKVNTRARPYKGHTKFLHKADSDKSLIADGVDTIA  
>GCA\_000155735  
AVIKPVIQTIYAPVLMILQEQVATVSGAGSPSLRAKTVYAKSGLQRKMATKWVAAPFYY-  
GVVKMGDIVQLVSISVDSRAVCTVAQLVDQEVVHGLVALEAVKKKIALEAIKGMTTEDPAKVTQYEE  
NIVLKGyRDVDDRADLLPILLGLTKIRFDPEPLVHDLPIPTVFEVV-  
GIMAQRGTIEVDDCGISTAVSDVDPIVFPIDLKAVAGKQMAFIDQETAVSDARTIALEELALEASIL  
VVGIKPLLIPI-FRDNGAT-MSFANRSRTLKSIVDLAVGSVTITRAR---EFVAEM-  
MQQAKAAALAEKRGTAEEIRIVKRMQKSAGLADDPDLVILEDGAEGNAAWAGQIYDDPISGSSES  
VGNIVHAANKRQNFQRSITFLRKAIESEKAAAPLMRGVKHNAKSRRSRKLDDAICVLNFPNVPEGIAIR  
AQSGTPADTLLHDGAEGEEILLIVRWVHTWKTAFVILLPEAGNVVGLIELGGIAAVGKMDGLLNRHH  
KLNGLSIEQKPIIEKMTLRLRAALKQKLGKDQVIFVVRVTGDLVAETKIQMG--  
NVGLVVAIQGDTIFVRRHRQTVIGDRETV-ILQGVAEGPADAAALLRIRVDHTLVKLTILLIPE-  
PVLVESVTIREGVGKALQIIQLDVYLLRDMGTGEPTLAKSKSRELIPELLQVDPITGVRLAFGKIKERLSRG  
MKLKDLD-----  
LAILVGITEPRMENLPEGVCRNFIDAGPRAAVGMLFLLLDEAGRIYIIDGDLRELTKSIKSLIGLVDAATPK  
ILSASYATTRLKIRYADCAVLVSDAELYAYAEDRKELMRMVPVYIICAAARRQLVIFALS LKGGHRRTRA  
ALEVLLPATILESQAEEGVVDHEDPAVLLDDGEIVGSEMMISRQAALDLKQILKVDVIVVFPEFQEKMV  
VSLRFFCTEVAIFVIALITTVGEMLSREPEHAQEAGAGFQKRIRTHSVLFAALLATFDRRNARCA-  
APQLFLHLGVAARYGILYKLQPKKKQMPSEPDKDRIDGFELVHAILNDGTS-EDLEFGAMALAVE-  
DASINVSAGVLAMTGMVDVEKVDSKRKVAVATKWTIAPVPLVDVCLSAADQMRCGLG-  
ITAADLSAALGRKELWFLFLPGANNKELEEAKLDGAGNSTAESAADKQIDILIVKPVLVVIQDSNTAALI  
SNDGVMEWGTMAYKKHYAFAARMRLHMRTID-----  
QMEPNKQKAIEKIKTVKLEGDTRFRQLATEGVKEQMP-  
IHALNPEFAVLRPVLVTPAVGQVADEAVLGAEVPCDFSL-  
RELQKSRRGNALPIAAMRLLGVRKARAMIDEGIMVAGKVAA-  
LLKIGALETITHIVLRNDSEASLPWRLSVAERLEADTKRASGYAARPFNSKPSLCDTQAHANVADPIEIIA  
VGYVATAERFVFPVEGIAIQILASPHSRVGGDKRAGEGHLHEMAKELKAKAVLMVKGEPENDTEGLL  
NYHTTGQPTDLLLTDCLDILIDMRRMSIV-----  
VQLNTV-  
HVVVAGVRDVGAYEIMQAAAHSGLIQVEQIDDLTGRERTLMYMYGSMEELWLMSLRYADWVINTPI  
GAILHVYAQAINRAFSLTRLQIEGWPEAQRWNTWQLWLNKDGFFSYDAAFRAKAVLKADLAD

FDMSDTEGVARYLSRQEIRAGYRIRQQVTFARLTPRTDILLQSKTRFAVIRHALDMVAILVIREVAPEFT-  
VVAQEDVAMGHVECVLADCFDFTEKNADIGPVGLKTPDNIFGDGTVLKDAVLGKIDLKNTVQDFRY  
RFITDGGRD LGVEWVT LQNM LYARIWVPPAQAALKDLQPITFFLSHPEVDL-----  
ISKARADQLMASVLIEEILEGIARFAGPEATTHQSNKAKHFKYYGEEVDPVHLAYILRIFALVATQVTISD  
RLKDRYVLNLQIFRSFTSLLWMSLQLANKGPSATIITLGTIAGLGALVLFILL-RDSILVETLYRYVY--  
MLGYSAAKDVADADPEHLLILSHASRDIEWIEIIPSFYYFK-----  
KKTNTAVAKEFFGLFKDRLRIVDALCVPPDRVEALIGVVALAGTLATSADALPGIIAAGLTSPNAAGVLE  
ADQDWNLHREMGITLAFYKAQSSVKGYFDKGLHKDVAAIALSEATGLTTPFHAGQTANKCAPAIHRII  
DLGDMEASLIEIDSSVKVADSEQTLADKPTTRENSVGAVGGVILAGTMKMGANLDSVERGSNIIIELEE  
QTYNGVNGKKN DGKMTNKVLMVLSAAFFVLRQLASANALDKGAVDLLVDAPNDADNLDHGESL  
TIPAPT VHSETTPLYAESEIERIAWVAPMHMLGTLPVLEFEPDQYSFISMKINATLNIMQTAEVLLDDY  
NVLEKGARPSAFRVILIRGLHIRQLAGIGTIIVVGSAGRTEITAYIEG-  
AVPITLNNKKTFLPAFSASSCHADIFSTMLRPPERSTIMTMILETVTEL-  
LEVTRFANDKLEHLRLLLPGLDLSEILPLAAAKDFAEIVTISASITAILSVA AEAVVLRREMLLTAEIAVTAL  
ALAMALLMLTPDRGLTQKEAAREEQMKELIQGGVVLQVRAADKMVLA STADKVRLATDEGTTSF  
ASLNLATVSDGFYVMSSAVLQMSSDLMMIVAVARVLADKETKNALVVRHPEQVKTPQTYAEGSPG  
MVLQTLTDHIPPLAIKPDDIELLWTLVAALWQVKAHLAQATRPHIERVLVLLALTLIVVLLQSQGGGI  
GGG-  
ASSAAKVLA AFSLTLKASVGEEVRKVARRVMDLNSRLGRPEEAVSPEFRGAELEQSKYE AENVELDCI  
ETVRRFVDIPFLVSTRTQHNESED RGARLVLDVTRIRLIDL-  
VTKKEIILAA RAETDGVISREMAKDLQSLHPEAAA LGKVAALQHYVAINAGHISNYVTANINSVLGML  
LLVLFIQQVRVGKVVWPSRREVTMVLIMATVALFFVIGL--  
QLVFMLAGISWQALTTLVLGEGVMVVRQTSTFPQDS-  
IGILQNTYADLICAGRVTKADIEASLHIVVGSRVARGTWYVIYHYEITQAQQKQGIMQRAFRQKTLKS  
LIDGRMEVKIKVVTSDRYA-  
TYEIKGGQHRKGTRFN RVKVGHNIPIDVLARMKMAFGPPNLILVKTFGAVVQKRFAQQLTHMRHGA  
VSIGPMEVASPYIKSKKARHAPGDSVVDLKP DNILRSVAVVPELIWAREKEDQGAVHDKYVKTTHTKA  
AKRNRVADKAQYDHRNQVELSFIGLAVKVLDPDKAIVEATAGQLLPTATVTVTEGLRGVAATIRLDPME  
KTLIAYIKRMRPQLNLAGKTDKKIVKCLNNNLD D IEYGKLGRRKIKPLTIKSVYDVEHERATELVKLLPYK  
DDVESRKSQFAEKDEALFEPLKAFMMMFGFIARAIYALYLRVVRTIVLVKTKIVVNAATVLSAIVGV  
VRLRHKSTNVAETNHTIKTIEKRARMTLAGAGKVKLN LHPGRVGMKGGRIGFMPYKNFNIFDKLASG  
RRAKVAELAKLKNVDKEISVDGIRVKQQGGRTPKAQLSNAVANTRVGVDIVGESEQUEESNPRANAE  
MGQIFATIDARIYHHVAALIGHALVAVLAVVAILGIGKAHALLAVE-KINAGIELHSAA-VNTAVAAA-  
YLD SGGEV-  
AIADVSEAYLGLISITSESLDVCRLRRRSISELKKTKEAYMSLTCFGGKGDRVKIVEAVQTQFYEIVATRT  
AERHGIKAGTYGKERAMMQIVPTKPVKVVVPIFVSEDELLAPVRAFAETVGDGITVVKLIKDIKVTMF  
EKAVASLAVAGKSSTVIYTVLEKVTLSKDIIEYQRAKAHYGRGRLSHVVTHTKNRRHFSMMKRTVVA  
SPSMNASRLTDGEVTVITGATMAFVMSEQDAV--  
GDVDLHYHEEPRREAALGIAGPETFLATEQPRVLALVFLRAYLLHIIDVGTKGGFADAATYDILRALTAK  
LDRKLSADI AKTRMCLHDNVADMGVTELAARRESAGDPILSSYWINGVTALVDIILLVANLECDCAPE  
NIHCAIRLFYQRVTLQAKERDGDVSVAVVA AKNQIEAAEGTVIYSIKGKTPSTTQMKNLIEGISRSIVKSL  
AVQLFQVDLFLNDTWLGTLLRAAGDVAYVDAKGGEEAVDHVVERDTELEFAPQKDIVTRKIRIYTPAA  
PSAVVIWDP AIEREDKADAQGTIIKIYGPNLQDISCFTDIGSEPKIESVKSWEKEKYVVRDDIPEDITT  
LVGKSSKVNKEFGIPDVEVCAPSKPGVTESIDRGEPKAGSCGEVANMAYPQESLVNAVSSANVQKNIS

MVLGGHPVGEMGISRGIERHLETSMCEIFVDKDDIDVALDFSTIALTPLRVGLDVPNAKVQIDGKETRK  
LMAVIDGDADLQRHPKVSEATGIVKTAGTKARLPDDALVYDGVQNGDIKFTITDLPRGRV-  
VTPVNNNIKAQLKIDKVMLKTFHVVTLSFSNSKGEELIKLRLNALKKSTRHYEMLLKIRETECAESPHAI  
SVGKILKIDALLQTICKAHYVEIEPLLADDLTALGVMGQQGLLHVVPRLMILAVLHLSRLGVALQLKNW  
GLQAIAACTDQTMGLQERDRAWSF-CIAEVVNNTFFARTANDDTEQTLHARNPI-VLL-YGKFGMT-  
ISPSGHRDSTPISEMEEDNAGNVILSAVGLQDAMEYVAKLLLVFVDEVILAFGSGDDPLRFLVAEQ  
VTGRENPGMVCLTRRTFPLDLQRDATFVLVFEDSTMKNLSHKKMHMNLILIKSKGWVNVSTTILISD  
QAIASYAEDVAAHTQPSALAAVTSRVMAPIVLVVSQKPTAPSKTLFLEALNLYDEVTATVQNKPKR  
YYVFEGDVISVLNSIDAAVLLGMQRPQPEAMRRRAVAMAIRLAIALRASDIAARLEEGFINFSRAVSFIR  
-HYAAHSEATHAPMGGTAVAFRVRNHKVTKRARPYKGHTKFLHKADMMDKSLIATGVDTLA  
>GCA\_000156135  
AVIKPVEINKYAPVLMIRQQEVATVSGAGSPSLRAKTVYAKSGLQRKMTKWVAKPIYF-  
GVLKMGNIQVLVSISVDNRAVCTVAQVVEQEVVHGLVALDAVKRKIALEEMGGMTTEDPAKVAEF  
EAEIDLKRFRDADARADMLPVMGLTLEVKFDPHEPVVHDLAVPVIYEVI-  
GIMADKGGIEVDDCAISNAVSDVDPIAYVSPIDLEAVAGEQMAFIDQEA AVAAARETIALEELALEAGI  
LVVGIDPLLLPV-FGDDADV-MSFAARSRTLGSIVALAVAYEELTRA-IDG-IASRM-  
MAAAQAAALAEKRGTAEIRIVKRMQRSSGLADDPELVILEDSAEGNSSWAGQIYDDPVSGSSES  
AGNIVYAANKRQNFARSITFLRKVEISDKAAAPLMRGVKHNSKRSARKLDDAIAGLNFPNVPPGIAIR  
AEAGRTADRLLHDAAEGELIMIVVRWHVTWKTAVAIALVYQAEDLVGLIELGGIAAVGRPDGILNRH  
HKLNGSLIEQRPIVEKLTLRRLASLKEKLGKDQVIIFVVKVQGD LVADATI QMG-  
GPVGAVVAIQGELIFVRRHKQTVITDQEATV-VLKGVAEGPADAQALLRIRVTHTLVGLSVLLIPE-  
PVLVESVQIREGVGKSLQIIQLDVYLLRDMGTGEETLAESRSRELIREVLAVDPITGVRLAYGKLKERM  
GKGLKDL-----  
GKLYQIDGDLRELPSKSVKSLIGLVDTKAPKVL SAGYAEERLRIRFADCEVLGTDANLYPYKEERRELLRM  
VPVYLILEAKRRQLIFALS LKGGHRRMMALGVMLAAAIIESQAEKGEVHHETPEILLDDAEVVGTSIM  
LSRQASLDLQINKVDVIVLFPEFQEKMVVSLKFFCTEVAIFVIALITTVGEMLSREPEHAQEEGAGFQK  
RIRGHSMLFALAVVFDRRNCDA-  
LPDLFLALGLAEPYRILYTNQPKKKQMPSEPDGDRVDGFELVHAVKEDGAS-  
HELEMPEAMALAVE-  
DATINLSAGVLAMNGGMVSIKVD SKRKVALAATKWNISKLELADVHISGSAPTRSCG-  
IEQAELSAALEAKVWFLPLPGASNAELEEAKLDGAGASTADAADDKQIHILLVKPVLVVIQDSNSAGL  
ISNGGLDEWGT MAYKKHYAFAARMRLHMRTID-----  
DMAPNKQKSEKVKTKLEGDTRFRQLATDGVKEQMP-LHALNPDAFV-  
LPLLTPAVGSAADENVLGAQVPVGASL-  
RELQKSQKGSALPISAVRLLAMRAARGMIEEDIMVAGKVAA-  
LLKIRALETVIAILLRNDTEATLPWRLSVAEKLEADTKRASGFAARPFKTKPSLCNTQAHAKIADPIQEI  
AGYVAAEERFVFPVEDIAIRLILSNPHSRVEEKKRGGEGLHGMMAKELLAKAVVMLRNEPGTNTTEGLL  
NYLTNNQPTDLLFEDCLDVIIDIRMSVV-----  
VHLNTV-  
HVVVAGVRSVGDYEIMSAKFPSGLVQVERVDDRTGREKTMWMYGAMEELWLMSARWADWVPD  
CAIGAILHVYAQEINRAFS LKRLQLDGWPKEAARWWNTWQLWLNKDGGFFGYEAAFRAVKQVLKAT  
LDFEMS NVEGVGRYQSKQELRVGYRIRQQVEFARLDPRTDILLQAKTRLSVIRHALEVVAAILRVDVAP  
EFTLVVAYQDVARGHVECVLAESFDFTEKNAHIGPVGLRTPASIFGDGTVLKEAVLGKIDLANTVAEFR  
YLVILDGGRALGVEWISLRNMLYERIWLPPAQAALKNLLPICFFLQHPELD LAWA-

ALFEGISKARADKLMAGALVEEILEGVARFADPEATTHQSKKAKHFKYYGEEVDPVHLAYILDLFALVST  
QVVVSDRLLKDRYVLNLKVFRGFTALWWMALQLSPKGPSATVITVGTIAGLGALVLFILL-  
RDSVLVETLYRYVY--MKGYEAAKDVQDADPEHLGQLAAASRDIEWIEIIPAFFYYFDTAT-  
FEPFNTAVAKEFFGLFEERLRIIDVLAVPPDRVAALVEFVALAGTLATSAEALVGVIACGLCEPNAAEVL  
AERDWNLHRSMGITLAFFEARESVKGYFDKGLHKDVAEIGLKEAGALTTHFRCDVDAKQIAPAVHRIL  
DLGEIEAALIEIDSAVVVADEEQTLADKPTTRDKSVGAIGGVVLAGTMNMGANLDSVERGGNIIIELE  
EHYHAVNGKKADGKLTDKVLMVLSVAYFPVIRRFASANALDRGVFGLLIDAPEDADNLDHGRVMTIP  
APSVLAETTPLYAESEIDKIAWIAPLHLLGTLPAVL-  
FEPDFQGFISMMIDASLEIMETAEVLDYHVLERGSRPPKFRVILIKGLHIRLLAAAGTILVVGSA  
GRTEV  
TAYIQGQAVPISLSKNTFLPAFSPSSCKAVDIFSTLLRPPERSAVEMLILETVAEL-  
LEVTRGSNDKLERLLVLLPGLDMAELLGLLAAAQDFADIVTL-----

-----  
TGDEGLTQKEQAREAQMKELIQAGAVLQIHAADAMVLASTADKVRLDTDEGTTSASFASLNLATVSD  
GFYVLSSAVLQMSSDLMMIVAVARVLADKESKNALVVRHPEQVKTQPTYAEGSPGMVLQTLTGCI  
PPLAIKPEEVELLWTLVAALWRVKAHLASAARPHTERVLILLALGLIVLLQSEGGGMGGG-  
IGAAAKLLAAFSILTMKAAVGDEVKVTTRVMDLSSRLGRPEETVNPEFKGEELDQTKYEAENVEVDC  
VETVRRFVDIPFLVSVRTQHNESEDGRARLVLDVSRVRFIDL-  
VTKKSVDILVERVETDGIARQMAKDMQSLHDEAAALGKVSQQLQHFIALGDAHISNYVTAEAHSVLG  
MLLLVLFIQQVRVSKVWWPTRREVTMVFIMAALALFFLVIGLGLNIVFMVGGISPLQITTLVLGEGVMA  
VRQTSTFPAES-

VTILQNTYADLICAGRVTKADIEKSLHIVVGARVARGTWYVIYHYEITQAQSPAGIMQRAFRQATLSQS  
LIDGRMEVKIKVVTSDRYA-  
TYEIKGGQHRKGTRYNRVKVGHNIPVDVLARIKMAFAPPNLVLVKTFGAVVQKRFAQPLTHMRHGA  
VTIGPMEVSSPYIQAKKARHAPGDSVVDIKPDNIVRSVAVVPELIWARENEDQSAVHEKYVKTTHKIA  
AKRNRADVKAQYDKRNQVHLSFIGLAVKVLPEQAIVHATAGTLLPTESVSVTENLKGVAATIRLDPME  
KALIAYIKMRPQLNLQGKTDNKIVKCLNNNLDDVEWGKLGRRKIKPITIKSVYDVEHERATELVKLMP  
YKDDVEGRKSQFAEK--

ALFEPLKAFMMLFGFIARAVYALYLRVIRRTILLVKTIVVNAETVLSAIKIGVSIRLRHKSTNIADTKHHIK  
TIEARARMTLAGAPAVKLHLRPGRVGGKGGRIKGYMPYKNYNIFDGLASGRRAKVKELAKLKKVDKTI  
AVEGIRTRQ-

GGRLSKADLSNALSNTNRVDVEVVGENVQEASNPRANAEMGQIFAAIDARVYSLVAALIGHALEALLA  
LCAILGIGRAHALLAV-LKMNAGIGMHSA-VAAAVAAA-  
YSQPGGEATALWDVSEGLGALAISEGLDVCRLRRRQIG-  
LKKTKEAYMSLTCFSGKGDVKIIEATQTQAYEIVATRTAERHGIHAKGTYGKERAMMQITPTKPVKV  
WVPVFSDEELLAPVRAFAETNGDGDVVKLAKDVKITMFEKGVASLAVSGKNNTTVYTVLEKVT  
ELMKDIIYEQRAKAHYGRGRLRSHVTHTKQKRHLSSMMKRTVVADPSMDAARLSDGEVSVVTGATMA  
FVMSEQDAV--

GDVDYHFHEEPRREAQLGIAGPETFLSTEQPRLLAMLFLREYLIHIVDIGTVGGFADAATIIDILRAMQN  
KLDRKLSADIAKVRMCLHDDVEGMGVKAEAPRRDQAGDAILSAYWINGVTANNDIILLVANLECKTA  
PENINCAVRLFYQRITLQAKERDGDVSVKLVPAQNQIEAAEGTVIYTIKGNPSTVQMKNLIEGIRSIV  
KSLALQLFQVDVFLNDTWIATLLRAAQDVVFDAREGKEAVDHVIERDTELEMAPQKDIVARKIRVYT  
PAAPSAVVIWDPAIEREDKADAQGTLMIYGPDLQDISCFTDIGSEPKIESLAAWDEKEYVHRDDIPE  
DI-  
TLVGKSSKVNKEFGIPDVAVCAPAKPGVTESIDRQEPKAGTCGEVANLPYPQESLVNRVSSANVQKNI

SMVLGGHPVGEMGISRGVERHLETNMCEIFVDPKPDIDVALDFYKIALTSLRVGLDKPNAKVEIDGKESR  
KLMAVKDGDATLQRHPKVSEESG--RKAGEKAKLPDDALIYDGVQHGDIKFTATDLPDGRV-  
VTPVIMSVKAQLEIDKVMLKSFHVVTLSFSNDKAEELIKRLNALKKSTRHYEMLLKIRDTECAQSPHA  
IPVGKILKIDALLQTICKAHYTAIEPLLADDLTALGVMGDQGLLHVVPRLMIIALLHLCELGAAAAIPHW  
RLQQAAILTDQTMGLAVRERRWSF-AISEVTGNTFFARTKDDDEQRLHARNPI-VIL-YGKEGML-  
ISPSGLRLASTAPSDKGHGNDKILSPERLQDAMYYYVLKVLLVFVDEIILAYGSGEGPLKFLVAHQAV  
TGRDNPQLVCLTRRTFPLDLQRDATFVLVLADTTMKNLSHKKMHMNLVLVKPKSWVENVSTKILISD  
QAIASYAEDAGAHTQPSESALAVITSRVIAPVLVVSQKPAAPSKTLFLEALNLYDEITATVQKRPKRYFIF  
EGDVVSVLGTLDAAVILGMQRPQPDRLRRAVTAHAIRLAIALRGSGVLASLEGGAINFSRAVDFAA-  
TY-GLEA-----DFRVRNHKTSTKRDRPYKGHTKFLHKAEAEKALIAEGVDITIA  
>GCA\_000156255  
AVIKPVSLNAYAPVLMIRQQQVATVSGAGSPSLRAKTVFRKSGLQKRTLTKWVAKKIYF-  
GVLKMGNIQVLVSISVDNRAVCTVAQVVEQEVVHGLVALAAVKRKIALEEMDGMTTEDPAKVAEF  
EVELDLKRFRDADARADMLPVMLGLTLEIKFDPHEPVVHDLPIPVIFEVI-  
GIMADKGGIEVDDCAISNAVSDVDPIAYVSPIDLEAVAGTEMAFIDQEA AVAAARETIALEELALEAGIL  
VVGIDPLLLPV-FGEDGGV-MSFAARSRTLGSIVALAVAAEELTRA-IDE-IASDM-  
MGAAQAAALAEKRGTAEIRIVKRMQRSSGLADDAELVILEDAAEGNSSWAGQIYDDPVSGSSES  
AGNIVHAANKRQNFARSITFLRKAESDKAAAPLMRGVKHNSKSRTARKVDDAIAVLNFPNVPPGIAI  
RAEAGKPADRLLHDATEGEEILMIVVRWHVTWKTAVAIVLVTAGNIVGLMDLGGIAAVGKPDGALN  
RHHKLNGSLIEQRPIEKMTLRLRASLKEKLGKDQIIIFVVKVQGD LVADATI QMG-  
GPVGAVVAVQGEVIFVRRHKQTVITDQDATV-VLKGVAEGPADAQALLRIRVTHTLVELSVLLIPE-  
PVLVDSVSIREGVGKALQIIQLDVYLLRDMGTGEETLAESKSRELIREIFTIDPITGVRLAYGKLKERMGKK  
LGLKELETI---  
RSILVAVTEPRMENLPGGVCRFTITAGPRAAVGMLFLLDDGGKLYSIDGDMRELPSVKSLIGLVDAK  
APKVL SAGYAEERLRIRFADCEVLASEADLYAYKEERRELLRMVPVYIINEAKRRQLIMFALS LKGGHRR  
TMMALGVMIAAAIIESQAEKGKVHHDAPAVLLDDAEVVGTAIMISRQSALDLKQLLKVDIIILFPEFQE  
KMVVS LKFFCTEVAIFVIALIVTVGEMLSREPEHAQESGAGYQKRIRGHSVLFALSAVFDRTNLRDA-  
TPDVFLALGLAQPRYGVLYTNQPKKKQMPSEPDGDRVDGFDLVHAVKEDESS-  
QELEMPEAMALAVE-  
DATINVSAGVLAMEGGMVAVEKVDSKRKVALAATKWSIAKLEVVDVTISGAAPVRCCG-  
IEMAGLSAALESKKV-  
FLFLPGASNAELEEELKD GAGASTAEAAADKQISILLVKPVLVVIQDSNSAGLISNGGLDEWGT MAYKK  
HYSFAARMRLHMRITDAIEVGVQLEPNKQKSEKVKTKLEGDTRFRQLAIEGVKEQMP-  
LHALNPDFAV-LPLLVTAVGSVAADERVLGA EVPVDFSL-  
RELQKSQRGSALPITAIRLLEMRAARAMIEEDIMVAGKVAA-  
LFKVRALETIVALLLRNDTEATLPWRLSVAERLEADTKRSSGFAARPFKSKPSLCKTQAHAKIADPIQEIA  
AGYVATEERFVFPVEGIDIQLILANPHSRVGTAKRAGEGHLHEMAKELLGKAVVMLRNEPDTNTEGLL  
NYLTNNQPTDLLFEDCLDVIIDIRMSVV-----  
VHLNTI-  
HFVIPGARDVAAFTIMSAKFD SGLIQVEQVDERTGRERTLMW MYGAMEELWLMSVKWADWVKDC  
DIGAIIHVYAQTINRAFSRLRLQLDGWPKEAARWWNTWQLWLNKDGFGYGEAAFA-  
KQILKATLADFEMKDVEDVGRMLSKQEIRAGYRIREQVEFARLDPRTDILLQAKTRLSIIRHALTVVAILIL  
RDVAPEFTLVVAYQDVARGHVECFLAESFDTEKDAHIGPVGLRTPAGIYGDGTVFKEAVLGKIDLAN  
TVAEFRLYLVDGGRELGV CWISLTNLLYPRIWLPPAQADLKDLLPICFLLQHPELDLAWG-VLFE-



ISKARADRLMAGALVEEILEGIARFADPEATTHQSKKAKHFKYYGEEVDPVHLAYILEIFALVSIQVVVSD  
RLKDRYVLNLKIFRALTALWWLSLQLAAGPSATIITVGTIAGLGALVLFILLMRDSVLVETLFFRYVY-  
-MLGYEAAKDVQDADPEHLGALTAASRDIEWEIIPAFFYYFDTAT-  
FEPFNTAVAREFFGLFKERLRIVDVLAVPPDRVTELVDVALAGTLSTSAQAAVGVIACGLCEPNAAAV  
LEAERDWNLHRSMGITLAFFEARKSVKGYFDKGLHKEVAEIGLREAGALTTHFLCAVEAKQIVPAVHR  
VLDLGEIEASLIEIDSAVVVADEEQTLADKPTRDKSVGAVGGVLAGTMNMGGNLDsveragnIIIEl  
EEEQYSAVNGKKADGKLTDKVLMVLSAAYFPVITRFSSANALDRGVFGLLIAAPSDADNLDHGRTMTI  
PAPTILTETTPLYAEADIDRIAWIAPLHMLGTLPAVLSFEPDHYSFISMMIDASLEIMETAEVL-  
DYHVLEKGARPPAFRVILIKGLHIRLLAAIGTILVGSAGRAEVTAYIQGQAVPISLRKHTFLPAFSPSSCK  
VVDIFSTLLRPPERSVEMLILETVAEL-  
LEVTRGTNEKLERMLILLPGLDLASLLDLLAAEDFATIVTLGAAITAILSVAEEAVVREMLLTkAEIAITA  
LAMAMALLMLTGDEGLTQKETAREAQMkELIQAGAVLQIHADDAMVLASTADKVRLDTDEGT TSA  
FASLNLATVSDGFYVLSSAVLQLSSDLMMIVSVARVLADKESKNALVVRHPEQVKTQPTYAEGSPGM  
VLQTLTDCIPPLAVKPEEVELLWTLVAALWRVKAHLANAARPHNERVLILLALGLIVVLLQSEGGGMG  
GG-  
ASAAAKILAAFSILTLKASVGDEVrKVTRRVMDLSSRLGRPEEAVNPEFKGEELDQTKYEAENVEVDCM  
ETVRRFVDIPFLVSVRTQHNESEDrgARLVLDVTRVRFIDL-  
VTKKSDVILVERVETDGIAREMAKDMQSLHPEAAALGKVSQ LQHFIALGDAHISNYVTAQTHSVLG  
MLLLVLFIQQVRVSKVWWPTRREVTMVFMMAALAVFFIVIGLGINLVFMVGGISPLQITTLVLGEGVMA  
VRQVSTFPAES-----  
NTYADLICAGRVTKADIESSLHIVVGARVARGTWYVIYHYEITQAQAPAGIMQRAFRQATLSQSLIDG  
RMEVKIKVVTSDRYA-  
TYEIKGGQHRKGTRYNRVKVGHNIPVELLARIKMAFGPPNLVLVKTFGAVVQKRFAQQLTHMRHGA  
VTIGPMEVSSPYIKSKKARHAPGDSTVDIKPDNVVRSVAVVPELIWARENEDQSAVHEKYVKTT HKIA  
AKRNRAVDKAQYDKRNQVHLSFIGLAVKVLPEQAIVHATAGTLLPTESVAVTENLKGVAATIRLDPME  
KSLIAYIKRMRPQLNLGGKTDNKVVKCLNNNLDDVEYGKLGRRKIPITIKSVYDVEHTQATELVKLMP  
YKDDVEGRKSQFAEK--  
ALFEPLKAFMMIFGFIARAVYALSLRVVRRTILLVKTKIVVNAETVLSAIIIGVSIRLRHKSTNVADTKHHI  
KTIEARARMTLAGAPAVKLHLRPGRVGKKGRIKGYMPYKNYNIFDGLASGRRRAKVKDLAKLKKVDKT  
IAVEGIRTRQQGGRLPKAQLSNALANTRVGVDIVGENVQEASNPRANAEMGQIFAAIDARVYSLVAA  
LIGHALEAVLAVCAILGIGRAHALLAVY-KMNAGIELHSAA-VAQAVAAA-  
YSQPAGEATAIADVSEAYLQALAVTDQSLDVCRLRRRQLGELKKTKEAYMNLTcfSGKGDKVKIVEA  
TQTQAYEIVATRTAERHGISAkGTyGKERAMMQITPTKPKVWVVPVFNDDellAPVRAFAETNGDG  
VDVVKLSNDIKVTMFEKGVASLAISGATTVVYTVLEKVTelskdIIYEQRAKAHYGRGRLRSHVTHTK  
QKRHLSMMKRTVVADPSMDAARLTDGEVSVVTGATMAFVMSEQDAV--  
GDVDMHFHEEPREAEELGIAGPETFLSTEQPRLLALLFLREYLIHIVIDITTTGGFADAATIIDILRAMQN  
KLDRKLSADIAKVRMCLSDDVADMGVTDVAPRRDTAGDTILSAYWINGVTANTDIILLVANLECKTAP  
ENIDCAVRLFYQRVTLQAKERGGDVSVELVPAKNQIEAAEGTVIYTIKGNPSTVQMKNLIDAISRSIV  
KSLAVQLFQVDVFLSDTWIGTLLRAAEKV FVDAREGKEAVDHVVERDTALEMAPQKDIVARKIRIFTP  
AAPSAVVIWDPaIEREDKADAQG TILMIYGPDLQDISCFTDIGAEPKIESLAAWDEKEKYVVHRDDIPE  
DI-  
TLVGKSSKVNKEFGIPDVAVCAPAKPGVTESIDRGEpkAGSCGEVANLPYPQESLVNRVSSANVQKNI  
SMVLGGHPVGEMGISRGVERHLETNMCEIFVDKDDIDVALDFYKITLPLRVGLDKPNAKVQIDGKES  
RKLMaVKDGDADLQRHPKVSEESGVLrkAGEKAKLPDDTLMYDGVQHGDISFTATDLPEGRV-

VTPVFNAVKAQLEIDKVLLKTFHVVTLSFSNDKAEHLVKLRLNALKKSTRHYEMLLKIRDTECAQSPH  
AIPVGKILKIDALLQTICKAHYTAIEPLLAEDLTALGVMGDQGLLHVVPRLMILAVLHLCGLGAMMELSE  
WPLQENALITDQTMGLPVRQRAWSE-AISEVTGNTFFARTKDDDETERLHARNPI-VIL-YGKAGML-  
ISPSGLKLASTDPSDDDHGNGDQLILSHERLQDSMSYHILQILLVFVDEVILAYGSGDEPLKFLVANQA  
VTGRANPQLVCLTRRTFPLDLQRDAVFVLVLEDTTMKNLSHKMHMNLVLIKSGWVENVSTKILISD  
QAIASYAEDAGAHTQPSALAIITSRVIAPIVLVVSQKPTAPSKTLFLEALNLYDEITATVLKRPKRYFIFE  
GDVVSILETLDAAVILGMQRPQPDLRLRAVVARAIRLAIAIRGSGILAELEGNAINFSRAVDNSE-TY-  
GLEA-VGLAID-TAL-----  
>GCA\_000156335  
AVIKPVIQNEYAPVLMIAQTQVATVSGAGSPSLRAKTVYAKSALSRTMTKWVAKPIYY-  
GVLKMGNIQVLVSISVDNRSVCTVAQLVEQEVVHGLVALAAVKRKIALDEIDGMTTEDPARVAQF-  
-----IPVIFEVV-  
GIMADRGGIEVDELAVSQAVSDVDPIEYVSPIDLAAGTEMFIDQEAATAAARETIALD-  
LAEASILVVGKIPLLLVP-FGDDADV-MSFANRSRTLRSIVNLAVAFPEVKRA----AFAADM-  
MREAQAAALAEKRGTAEEVRIVKRMQRSAGLADDPLEVEDAAEGNSNWAGQIYDDPISGSSES  
AGNIVF-  
ANKRQNFQRSITFLRKVEISDKSAAPLMRGVKHNSKSRASRKIDDAIADLNFPNVPEGIAIKAAAGKST  
DTLLHDATGEIEILLVVRWHVTWKTAIIIVLIA-  
AGDVVGMIELGGIAAVGKPDGLLNRHHKLNGSLIEQRPIIEKMTLRLRASLKQKLGADQVIIFVVKVQG  
DLVADATVQMG-  
GPVGSVVAVQGDVIFVRRHKQTVIGDQETTVEILKGVAQGPAAEALLRIRVTHTLVKISVLLIPQ-  
PVLVEAVTIREGVGKALQIIQLDVYLLRDMGTGEETLAESMSRETIREVLAVDPITGVRLAFGELKERQSK  
KLVLKDLET----  
LSILLAVTEPRMEDLPDGVCRFTVTAGPRAAVGMIFLILDDTGKIYPIDGDLRELQSVKSLIGLVDAKVP  
KVLISAGYATTRLKIRFADCEVLNAEADLYAYKEERKQLLRMVVYIIEAKRRQLVVFLSLRGHRRAM  
AAIGVMLAAAILESQAENGEVNHTQPAILLEDAEIVGTAIMVTRQSALQVKDRTKVDVIVVFPEFQEK  
MVVSLRFFCTEVAIFVIALITTVGEMLSREPEHAQEEGAGFGKRIRSHSMLFALRVVFERDNLRDALGP  
DLFVGMGLAPPRYGIVYTNPQKKKQMPTEPDSRVDGFDLVHAIKEDKASNHELEMPAMALAVEA  
DAPINVSAGVLAMTGGMVDVEKVDSKRKMSLAAT-----MQDLHLSAASQFRCLG-  
IELADLSAALGAKAE--  
LYLPGASNEELEDKLNAGASTADVAADRQRNILLVIPVLVVIQDSNTAGLIANDGLDEWGTMAYK  
KHAFYAFARMRLHMRTIDSIEVGVEMEPNKQKAEIKITVKLDGDRFRQLATEGVKEQMPVLHALNPD  
FAV-LPLLVTAVGSVAADENVLGARVPVDASL-  
RELQKSQKGNALPISAIRLLEMRAARGMVDEDIMVAGKVAA-  
LLKISALETVIDVILRNDSEAVLPWRLSVAEKLEADTKRASGYAARPFKSKPSLCDTQAHAKVADPIQEI  
AASYVAKEERFVFPQEGIAIQIVLNNPHSRVDSEKRAGEGHLHEMAKELMAKAVIMIRNDPDTNSEGL  
LNYITTNQPTDLLFEDCLDVIDMRRMSVV-----  
VHLNTV-  
HVVVEGVRDVGNYEIMAAQAPSGLIQTERVDDRTGRERTIMWYGMEDLWLLSIRYADWVWDC  
AIGAILHVYAQQINRAFSRLRLQLDGWPEASRWNTWQLWLNKDGFFSYDAAFAVMQVLKAA  
LADFEMKDVHGVGRMLSRQEVVRAGYRIRQQVDFSRLDPRSDILLQAKTRLSVIRHALEVVAIILREVA  
TEFTL-----  
DGTVLNDAVLGKIDLSNTVADFRYLMLIDGGRQLGVDWLTMQNMPLYPRIWVPPAQAAKLNLTPICF  
FLSHPELGQLID-

SSFGGISKARAAQLMAGALIEEILEGVARFADPEATIHQTHKEKHFKYYGEEVDPVHLAYILDMFALVA  
TQVTVSDRLLKDRYVLNLRVFRGFTSLLWMSAQLAEKGPSATVITVGTIAGLGALVLFILL-  
RESVLIETLFWRYVY--  
MKGYQAAKDADADPEHFLALASASRDVEWIEIVPAFFYYFSTATSRLEKNTAVAREFFGLFKERLRVIE  
VLVPPDRVEALVEFVALAGTLTTSAEALPGVIAFGLCEPNAAGVLEAERDWNLHRTMGITLAFFKAQ  
VSVKGWFDKGLHKNVAETGLREAGGFTTPFHAGKDAKRCVPVHRVIDLGELEAGLIEIDSAVVVADS  
EQTLADQPTTRDNSVNAIGGVVLAGTMNMGASLDTVERSGNIIIEESQYHAVNGKKADGKMTNA  
ILMVLSTRAYFPVIAYVASANALDRGTFNLLIQAPDDADNLDHGREMVIPAATVHAETTPLYAESDIDKI  
AWIAPMHMLGTLAAVLVFEPDQYSFISMMIEASLDITETAEVLLDDYHVLEKGARPPAFRKILIRGLHIRL  
LAAVGTLVVGSAGRTEITAYIQGRAVPITMRKSTFLPAFAASSCKTIDIFSTMLRPPERSTIMMLILETVT  
EL-  
LEVTRGENDKLERILILLPGLDLAVILGLVAAAKDFAQIVTVDASITAILSVAEEAVVLREMLLTAEIAVT  
ALAMAMALLMLTADKGLTQKEASREHQMKELIQGGAVLQVRADDAMVLAATADKVRSTDEGTT  
SAFASLNLATVSDGFYVMSSAVLQLSSDLMMIVAVSRVLADKETKNALVVRHPEQVKTOPTYAEGSP  
GMVLQTLTACIPPLAIKPEDVELLWTLVAALWRVKAHLASATRPRIERVVLILALGLIVVLLQSEGGGM  
GGG-  
VGAAAKVLALFSILTIKATVEDEVKVTTRVMDLNSRLGRPEEAVAPEFRGEELEQNKFEAANVEVDC  
METVRRFVDIPFLVSTRTQHNESEDGRSRMVLVDVTRVRFIDL-  
VTKRSEIILVERAETNGIARQMAKDLQALHDEAAAALGKIASLQHFISLNDGHISNYITAQVNSVLGMLL  
LVLFIQQVRVSKIVWPTRREVTMVFILAAVFFVIGLYINLVFMVGGISPLQITTLLVLEGVMVVRQV  
STFPAEA-  
VTILQNTYADLICAGRVTKADIEKSLHIVVGARVARGTWYVIYHYEISQAQGPAGIMQRAFRQATLSKS  
LIDGRMEVKVKVVTSDRYA-  
THEIKGGQHRKGRYNRVKVGHNIPVDLLPRMKMAFAPPNLVLVKTFGAVVQKRFAQQLTHMRHG  
AVTIGPMEVSSPYIRAKKHAPGDSVVTIKPDNIVRSVAVVPELIWARENEDQSAVHDKYTKVTHKIA  
AKRNRVADKAQYDKRNQVHLSFIGLAVKVLPEQA-----  
----  
RMRPQLNLAGKTDKKIVKCLNNNLDDEYGKLGRRKIKPITIKSVYDVEHTRATELVKLMPYKDDVEG  
RKSQFAEK--ALFEPLSAFMMMFGFIARAIYALYLRVIRRTIVLVKTKIVNAA---  
AIKIVGVSIRLRHKSTNVAETKHHIKTIDARARMTLAGSPSVKLHLSPGRVGTGGRIKGYMPYKNYNIF  
DKLSSGRRAKVKEAKLKKVKDITVAGIRTRQQGGRIKADLSNSLANTRVGVDIVGENEQUEESNPR  
ANAEMGQIFAIDARVYSHVGALIGHALA AVLAVCAIQGIGKAHALLAVKLKVNAGIEFHSA--  
VAVAVAAA-YAQQAGEA-ILADVSEPNLRALAVTEASVDVIR--RRKLG-----  
-----  
RHGIKAKGTGKERAMMQILPTKPVKVVVPVFNEDELLAPIRAFAETNGDGVTVVKLAKDIKVTMFE  
KGVASLAVTGKATTVVYTVLEKVTELMKDIIYEQRAKAHYGRGRLRSHVVTHTKSKRHLSMMRRTVVA  
APRMDAARLTDGETSVITGATMAFVMSEQDAV--  
GDVDMHFHEEPQREAGLGIAGPETFLATEQPRLLALLFLREYLLHIVDIETQGGFADAATIYDILRAMQ  
NKLDRKLSADIKTRMCLHDDVADMVQGEVAARRDSAGDAILSSYWINGVTANADIILLVANLECKV  
VPENINCAIRLFYQRITLQAKERGGDVSVLVKAQNQIEAAEGTVIYTIKGTPTTQMALVVEAISRSIV  
KSLAVQLFQVEHFVNDTWIATLLRAADGVVYVDARGSDAVIDHVVVERDTELEFAPQKDIVARKIRIYT  
PAAPSAVVIWDPAIEREEKADAQGTILMIYGPDLQDISCFTDIGAEAKIESLKSWEKEKYVVRDDIPE  
DISTLVGKSSKVNKEFGIPDVAVCAPAKPGVTESIDRGEPKAGSCGEVANLPYPQESLVNVRVSSANVQ  
KNISMVLGGHPVGEMGISREIERHLETNMCEIFVDKDDVDVALDFYRISLTALRVGLDPPNAKVEIDGK

ESRKLIIVMDGDADLQRHPKLSEESGALRKADTKARLPDDALLYDGVQHGDTSFTATDLPDGRV-  
VTPVNNKVKAQLKIDKVMIRTFHVVTLSFSNSKGEDHLIKLRLNALKKSTRHYEMLLKIRDTECATSPHA  
ISVGILKVDSLLQTICEAHYTEIEPLMADDLTALGVMGDQGLLHVVPRLMILAVLHLSLEAAMTLDH  
WSLQEKGLITDQTMGLPARAQAWSY-CISEVVGNTFFARTKDDDEQRLHARNPI-VLL-  
YKGIGMV-  
ISPSGLRLDSTAVDEMERNKDKLILSRERLQDAMGYIILRILLVFVDLVILAYGSGDTPMKFLVADQA  
VTGRNNPQLVCLSRRTFPLDLQRDATFVMVFADATMKNLSHKKMHMNLVLIKSGWVVNVSTKILIS  
DQAIASYAEDVGAHTQPSSESALAAITSRVMPIVLVVSQKPTAPSKTLFLEALNLLDEVTATVLNPKR  
YFVFEGDVVSVLGTVDAAVLKGVQRPQPDRMRRAVVAKAIRLAIAAQASGLLASLEAGVINFSRAVSL  
AAGVFDDMDLVPQAATE-PALAFVRNHNKVSTKRARPYKGHTKFLHMNDTDKSLIAEGVDTIA  
>GCA\_000158135  
AVIKPVTQDTYAPVLLIRQQEVATVTGAGSPSLRAKTVYRKSGLQRTSTKWVAAPIYY-  
GVLKMGNIQVLVSISVDNRSVCTVAQVVEQEVVHGLVALEAVKRKIALEAMDGMTTEDPAKVAEFE  
EEVDLKKFRDADARADMLPVMLGLTLQIRFDPEHPVVHDLPIPIYIEVI-  
GIMADKGGIEVDDCAISNAVSDVDPIAYVSPIDLA AVAGEQMAFIDQEAAVAAAREAIELEALEAGI  
LVVGISPLLLPV-FGEEGDV-MSFANRSRTLESIVALAVAYPALTRARIDG-IASAM-  
MQRAQAAALAEKRGTAEIRIVKRMQRSSGLADDPELVILEDASEGNSSWAGQIYDDPISGSSESDSA  
GNIVHAANKRQNFARSITYLRKVEITDKAAAPLMRGVKHNAKSRSARKLNDAIAILNFPNVPAGIAIRA  
EAGKPGATLLHDATEAEIILLIVVRWHVTWRTAIIVLTFTAGDIVGLIEMGGIAAVGKPDGLLRHHKL  
NGSLIEQRPIIEKLTLRRLASLKEKLGAEQIIIFVVKVQGDVLVADAKVQMG-  
GPVGAVVAIQGDVIFVRRHKQTVITDQESTV-VLKGVAEGPADAQTLLRIRVTHTLVELSVLLIPE-  
PVLVESVTIREGVGKALQIIQLDVYLLRDMGTGTETLAESGSRELIREVLAVDPITGVRLAYGKIKERMKG  
KVGLKDL-----  
LSILAAVTEPRMQNLPAVCRTFIVAGPRAAVGMLFLLLSDEGKLYAIDGDMRELLKSVKSLISLVDAK  
APKVLSAAYAEDRLKIRFADCEVLVSEADLYAYKEERRELLRMVPVYIILEAKRRQLIIFALS LKGGHRT  
MMALGVMIAAAIIESQADKGPIHHDQPEILLDDAEVVGSSVMISRQAALDIKQFTKVDVVIFPEFQE  
KMVVS LKFFCTDVAIFVIALITTVGDMLSREPEHALESAGYQKRIRGHSVLFALAATFDRRNMGDA-  
TSDLFLALGLIDPRYGILYTNQPKKKQMPSEPDSDRVDGFELVHAIKEDTASNEELEMPEAMELAVEYD  
ASINVSAGVLALSGGMQAVEKVDSKRKVALAATRWNISRLKIQDIHLSGAAKFRSCG-  
IELADLSAALSNNKLWFLFLPGASNAEEEEKLDGAGASTADAAEDKQIAILLVKPVMVVIQDSNAASL  
VANGGVDEWGT MAYKKHYSFAARMRLHMRTID-----  
MAPNKQKSEKVKTVKLEGDTRFRQLAVDGIKEQMP-LHALNPDFAV-  
LPLLTPAVGSVAADENVLGARVPVDASL-  
RELQKSQKGAALPISGVRLAMRAARGMIEEDIMVAGKIAA-  
LLKIRALETVDIVLRNDSEATVQWRLSVAEKLEADTKRGGGFAARPFKSKPSLCDTQAHAKVADPIQE  
IAAGYVAADERFVYPVEGIAIQLILTNPHSRVGTAKRAGEGHLHEMAKELMAKAVLMLRNEPDTNTEG  
LLNYLTNNQPTDLLFEDCLDVIIDIRMSVV-----  
VHLNTV-  
HVVEGVCEVGDYTIMAAAFPSGLVQVERVDDRTGHERTLMWMYGAMEELWLLSVKWADWVFD  
APIGAILHVYAQNINRAFS LKRLQLD GWPKEAARWWNTWQLWLNKDGFFGYAAAFRA-  
KQVLKATLADYEMSDIKGVGRMASKQEIRAGYRIRENVDFARLDPRTDILLQAQTRLSIIRHALTVVAIL  
VLRDVAPEFT-  
VWAYQDVARGHVECVLAESFDFTEKNAHIGPVGLRTPETIFGDGTVMREAVLGKIDLANTVADFRYLV  
LVDGGRALGVEWLTIQNMLVGRIWLPPAQAALKNNLPICFFLQHPDLDL-----

ISKARAEKLMAGALVEEILEGIARFADPEATTHQSKKAKHFKYYGEEVDPVHLAYILDIFALVSTQVTVS  
DRLLKDRYVLNLKVFRGLTSLWWLAGQLSDKGPAATVITVGTISGLGALVLFILL-  
RDSVLVETLYHRYVY--MRGYSAAKDVADADPEHFLVLSAASRDLEWIEIVPAFFYYFKTAS-  
FEPFNTAVAKEFFGLFEERLRVIDVLAVPPDRVAALTEFVALAGTLATSAEASPGVIATGLCEPNAAAVL  
EAERDWNLHRSMGITLAFPEARASVKGYFDKGLHKGVAEINLQEAGALTTHFQCKAEAKRCVPAVHR  
VLDLGEIEAALIEIDSAVTVADEEQTLADKPTTRDKTVGAIGGVVLAGTMNMGANLDSVERGGNIIIELE  
EEQYSAVNGKKADGKLTDKVLMVLSLCYFPVIERPASANALDRGVFHLLIDAPEDADNLDHGYTMTIP  
APSVHTETTPLYAESDIDKIAWIAPLHLLGTAAVL-FEPDQYSFISMMIEASLEITETAEV--  
DYHVLEKGSRPPAFRVVLIKGLHIRLLSAVGTLVVGSAAGRAEITAYIQGQAVPITLRKHTFLPAFSASSCK  
VVDIMSTMLRPPPERSTVEMLILETVAEI-  
LEATRGENEKLERMQMLLPGLDMANLLALVAAAADFSDIVTIGAAITAILSVAAESVVLREMLLTKEAIA  
ITALALALALLMLTGDKGLTQKWRAREAQMKELIQSGAVLQVHADDAMVLAATADKVRLDTDEGT  
TSAFASLNLATVSDGFYVLSSAVLQMSADLMMIVAVARVLADKESKNALVVRHPEQVKQTQPTYAEGS  
PGMVLQTLTECIPPLAKADEVELLWTLVAALWHAKAHLASAARPRIERVLIILLALGLIVVLMQSEGG  
GMGGG-  
MGAAAKILACFSMLTLKASVGDEVKVRTRVMDLNSRLGRPEEAVNPEFKGEELDQTKYEAENVEVD  
CLETIRRFVDIPFLVSIRTQHNESEDGRARLVLDVTRVRFIDL-  
VTKKSDVILVERVETDGIARQMAKDMQSLHPEAAALGKVSALAHFIALNDGHISNYVTADVGSVLG  
MLLLVLFIQQVRVAKVWWPTRREVMTVMFIMAALAVFFLVIGLLVNLVFMVGGISPLQITTLVLGEGVMA  
VRQVSTFPSES-  
ITILQNTYADLICAGRVTKADIERSLHIVVAARVARGTWYVIYHYEISQAQGPSGIMQRAFRQATLSQS  
LIDGRMEVKIKVVTSDRYA-  
TYEIKGGQHRKGTRYNRVKVGHNIPVDVLARIKMAFGPPNLVLVKTFGAVVQKRFAQQLTHIRHGAV  
TIGPMEVSSPYIQSKKARHAPGDSVVDIKPDNIVRSVAVVPELIWARENEDQSAVHEKYVKTTTHKIAAK  
RSRAVDKAQYDKRNQVHLSFIGLAVKVLPEKAIVQATAGMLLPTESVAVTENLKGIAATIRLDPMEKAL  
IALIKRMRPQLNLQGKTDNKVVKCLNNNLDDEWVGKLGRRKIKPITIKSVYDVEHKRATLVKLMPYK  
DDVEGRKSQFAEK--  
ALFEPLKAFMMLFGFIARAVYALSLRVVRRRTILLVKTKIVVNAETVLSAIIIGVSIRLRHKSTNVADTKHHI  
KTIEARARMTLAGAPAVKLHLRPGRVGGKGGRIKGYMPYKNFNIFDGLASGRRRAKV/KELAKLKKVDKTI  
TVDGIRTRQ-  
GGRLPQAELSNALANTRVGVDIVGENEQGASNPRANAEMGQIFAAIDARVYSLVAALIGHALAAVLA  
VCAILGIGRAHALLAVKLKINAGIELHSAA-VAAAVAAA-  
YAQPGGEAAALWDVSEAYLGALVVTEESLDVCRLRRRQLG-  
LKKTKEAYMSLTCFSGKGDVKVIVEATQTQAFEIVATRTAERHGIAKAGTYGKERAMMQITPTKPVKV  
WVPVFNDDPELLAPIRAVAETNGDGVAVVKLTDDIKVTMFEKGVASLAISGKATTLVYTVLEKVTLSK  
DIIYEQRAKAHYGRGRLRSHVVTTTKQKRHLSMIKRTVVASPHMEAARLVDGEVSVVTGATMAFVMS  
EQDAV--  
GDVDMHFHEEPRREAQLGIAGPETFLSTEQPRALALLFLREYLIHIVIDTTGNFSDAATIYDILRAMQN  
KLDRKLSADIAKVRMCLADDVADMGVTDVAARRDTAGDQILSAYWINGVPANADIILLVANLECHT  
APENIDCAVRLFYQRITLQAKERNGDVSVLPAQNQIEAAEGTVIYTIKGENPGTSQMMLNVEGISRS  
IVKSLAVQLFQVDVFLNDTWIATLVRAAQDVVFDAREGKEAVDHVVERDTELEMAPQKDILGRKIR  
VYTPAAPSAVVIWDPAIERADKADAQGTILMIYGPLDQDISCFTDIGAEPKIESLSKWDEKEKYVVHRD  
DIPDI-  
TLVGKSSKVNKEFGIPDVAVCAPAKPGVTESIDRGEPKAGSCGEVANLPYPQDSLNVNRVSSANVQKNI

SMVLGGHPVGEMGISRGVERHLETNMCQIFVDKADVDVALDFYKLSLTSRVLGDKPNAKVQIDGKE  
SRKLMAIRDGEADLQRHPKVSEESGVLRKAGEKASLPDDTLIYDGVQHGD LKFTATDLPEGRV-  
VTPVVMVAKAQLKIDKVMKTFHVVTLSFSNDKGDEHLIKRLNALKKSTRHYEMLLKIRDTECAQSP  
HAIPVGKILKIDLLQTICVAHYTEIEPLADDLTALGVMGDQGLLHIVPRLMILAVLR LIQLDAATLIPK  
WDLQHRALITDQTMGLAVRRRDWSF-AISEVVGNTFFARTKDDDEERLHARNPI-VIL-  
YGKLG MV-  
ISPSGLRLRSTAPSEQQHGN DTKLILSRERLQDAMYYYILRVLLVFVDEMILAYGSGDQPMKFLVASQA  
ITGRANPQLVCLTRRTFPLDLQRDATFVLVLEDSTMKNLSHKMHMNLVLVKPKSWVENVSTKILISD  
QAIASYAEDAGAHTQPSALAVITSRVIPIVLVVSQKPTAPSKTLFLEALNLYDEITATVQKRPKRYFIF  
EGDVISVLNDMDAAVLLGMQRPQPDRLRAVTA AAIRLAIAIRASDIVAALDND CINFSAVSFAG-  
HYSRA-----DFVRNHKTSTKRDRPYKGHPKFLHKAEEEEKALVAEGVDTLA  
>GCA\_000161755  
AVIKPVVLNTYAPVLMIRQTQVATVSGAGSPSLRAKTVFRKSGLQRKTSTKWWASPLYF-  
GVLKMGKIVQLVSISVDNRAVCTVAQVVEQEVVVRGLVALAAVKRKIALQEISGMTTEDPAKVVEFEA  
ELDLKRFRDADDRADLLPVMGLTSLIKFDPHEPVVYDLPVPVIFEVI-  
GIMAERGGIEIDECGISTAVSDVDPISYVGPIDLEVVGGEKMAYIDQEAAVSAVKEEIGLEELAESNVLV  
VKI-PLLLPV-FGEDGGN-MSFAKRSRELASIVDLAVSAVATTRAR-----AATM-  
MARAQAAAALSEKRGTAEEIRIVKRMQKAAGLADDPDLVMLEDA AEGNAAWAGQIYDDPISNSSSED  
SQGNIVHAANKRQNFARSITFLRKVEISDKAAAPLMRGVKHNSKSRASRKIDDAIAELNFPNVPEGIAI  
RAEQNKPSATLLHDATETEEILLIVRWDVTWKTAVIVGLLFIAGNAVGLIELGGIAAVGKPDGLLNRH  
HKLNGSLIEQKRVIDKLT LRVR AALKQKLG TENVIILVVKVQGD LVADATVQM-  
GGVLGAVVAIQGDVIFVRRHRQT VVT DSEATV-VLRGVAEGPADAQALLRIRVDHTLVEVSVLLIPE-  
PVLVDSVSIREGVGKTLQIIQLDVYLLRDMGTGEETLAESMSRELIRDVL TIDPITGVV LAYGGFRERASK  
GLTLKELETL---  
LAIMGAVTEPRMENLPEGVCRDFVQAGPRAAVGMIFLLDDAGRIYEIDGDLREL PKTVKSLIGLVDAK  
APKVL SASYATERLRIRFADCSVLESEANLYAYAEERKELLRMVPVYVINEAKRRQLVIFALSLKGGHRR  
ARAALGVLIAAALLESQATQGEVHHAVPEVLLDNAEVVGTSMISRQSALELKHVLKSDVVVVFPEFQ  
EKMVVS LKFFCTEVAIFVIALITTVGEISREPEHAQESGAGFAKRIRRH SVLFALACCFDRRNLGDA--  
PDLFSLGLASPRYGVLYINQPKKKQMPSEPDGDRVDGFELVHAVKSDGRS-HELEMPEAMALAVE-  
TEKINLTAGVLALNGGMAAVERVDSKRKLGVAAASKWSISRLES LDVHFSGAAPVRCTK-  
IELADISAALASKKLDALYLLGASNAELEDKLDGAGNSTADVAADRQRQILLVHPVIVVIQDSNAAGL  
VSNGGIDEWGT MAYKKHYAFAARMRLHMRTIE-----  
ELEPNKQKSEKVKTVKLEGDTFRQLAVEGVKEQMP-  
LHALNPDFAVLVPVLVTPAVGQVAADAEVLGAEVPVEFSL-  
RELQKSQTGAALPISAVR LLEMRAARAMVDEDIMVAGKVAA-  
LLKIRALETVLQVVL RNDSEAWGPWRLSVAERLEADTRRASGFAARPFRMKPSLCTTQAHAKLAEPIK  
EIAAGYVATENRFVPVEDIAIQIVLSSPHSRVETSKRAGEGHLHEMAKELVAKAVLLLQNQPPTTEGL  
LNYLTTNQPTDLLFPDCLDVIIDLRMAVV-----  
VHLTTV-HVVVAGTSDVGDYEIMAAAA-  
SGLVQVERVDDRTGRERTKMWMYGAMEELWLMSVTYADWVPDCAIGAILHVYAQTINRAFSRLRL  
QIEGWPK EADRWNTWQLWLNKDGFFGYEAAFRAQAQVLKATLFDYEMSDVEGVGRYQSRQQL  
RVGYRIRDQVEFARLDPRTDILLQAQTRLSVIRHALTVVAILVLREVVGESL VVAMEDVAMGHVECVL  
ADSFSTAKNAHIGPVGLRTPDTIFGDGTVLKEAVLGKIDLRNTVAEFRYRMITDGGRELGVKWITVQN  
ILYARIWVPPAQAALKNLLPICMFLSHPEVDL-----

ISKARADKLMAGALIEEIIPEVARFAAPEATTHQSHKAKHFKYYCEEVDPVHLAYILDLFALVSTQVTVS  
DRLLKDRYVLNLKVFRGFTSLLWISAQLGEKGPSATIITVGTIAGLGALVLFILL-RDAVLLETIFYRYVY-  
-MRGYSAAKDVADADPEHLL-LSAATRDVEWIEIVPAFFYYFSTATKN--  
KNTAVAKEFFGLFEERLRVIDVLAVPPDRVEALEEFVALAGTLATSAEALVGIIATGFCSPNAAVLEAD  
QDWNLHRSMGITLAFYKAQKSVKGWFDKGLNKAVAETQLREAGALTSTFAAAVEAKQCVPVHRVI  
DLGEIEAALIEIDSRVIVADEEQTLADKPTTREKSVGCVGGVVLAGTMNMGSNLEQVERGGNIIIEEEE  
HYHAVNG-  
KADGKITDKVLMVLSAALFPVLARWASVNALPRGVLGLLIEAPNDADNLDHGGLMSIPAPSVHAETT  
PLYAEAEIDKIAWAPIHLLGTLDVLLFEPDQYSFISMMIEASLEITETAEV--  
DYHVLEKGARPPGFRVVLIRGLHIRLLAAVGTILVVGSAGRTEITAYIQTRAVPITLNKHTFLPAFSASSC  
HVVDIFSTMLRPPERSAVMMMLILETVAEL-  
LDVTRGENDKLERILVLLPGLDAAALLELVAAAADFSNIVTLDAAITAILSVAEAETVVLRELLLTAEIAVT  
ALALAIALLMLTPDSGLTQREVAREGQMKELIQGGAVLQVHAGDRMVLASTADKVRNLNTEGTTSA  
FASLNLATVSDGFYVLSSAVLQMSSDLMMIVSVARVLADKETKNALVVRHPEQVKTOPTYAEGSPG  
MVLQT-----ILVLLALSIVVLLQSEGGGMGGG--  
SAAAKILACFSLTLKASVGEEVRKVTRRVMDLNSRLGRPEEAVNPEFRGEELEQSKYEAEENVEVDCVE  
TVRRFVDIPFLVSIRTQHNESEDGRARLVLDVTRVRFDL-  
VTKKSEILVERAETDGVIAREMAKDLQALQPEIAALGKIAALQHFVSLNDGHISNYVTADIHSLVGLMLL  
LVLFIQQTRIGKIVWPTRREVTTVFIMAALATFFLVIGLG-  
NLVFMVGGISVQQITTLLVLEGAMLVRQTSTFPAES-  
VTILQNTYADLICAGRVSKADIEKSLHIVVGARVARGTWYVIYNYEITQAQGEAGILQRAFRQATLSQS  
LIDGRMEVKIKVVTSDRYA-  
TYEIKGGQHRKGTRFLRVKVGHNIPVEVLPRLKMAFGPPNLILVKTFGAVVQKRFAQPLTHIRHGAVTI  
GPMEVASPYIGNKKARHAPGDSVVDVKPDNIVRSVAVPELIWARENEDQSAVHDKYVKTTTHKLQA  
KRNAAVDKAQYDKRNQVHLSFIGLAVKVLPEQA-----  
---  
RMRPQLNLAGKSDKKIVKCLNNGLDDVEYGKLGRRRIKPLTIKSVYDVEHREATELVKLMPYKDDVEG  
RKSQFAEK--  
AIFEPLRAFMMMLFNFIARAVYALSLRVVRRITIVLAKCKVVVNANTVLSAIIIGVSIRLRHKTNIADTKH  
HIKTIEARARLTLAGAPSAKNLNLRPGKIGKKGGRIGYMPYKNYNIFDGLSSGRRRAATKELAKLKKVDKTI  
EVGGIRTRQQGGRLSQADLSNAIANTRVGVDIVGENEQEESNPRANAEMGQVFAAIDARVYHLVAA  
LIGHALEAVLALCDIWGIGRAHSLLADW-RVNAGVEFHSA-VETAVAAA-  
YAQQAGEASVIADVSEGDLAGLGLAEASLDVLRRLRRRQLG-----  
-----  
RFGISAKGHYKGERAMMQITPTKPVKVVVPVFSSEDELLAPIRAFAETNGDGITVVKLTDDIKITMFEK  
GVASLAITGKSTTLVYTVLEKVTELAKDIIYEQRAKAHYGRGRLRSHVVTHTKQKRHLSMIKRTTVVAKPR  
MEARLTDGEVSVITGATMAFVMSEQDAV--  
GDVDMHFQEPRREASLGIAGPETFLSTEQPRVLALLFLREYLIHIVEIDTVGGYNDAATIYEILRAMESK  
LDRKLSAEIAKVRMCLHDDVADMGIRQEAPPREKAGDPILSAYWINGVTANADIILLVANLDCETPPE  
NIDCAVRLFYQRVTLQAKERGGDVSVLIPAKNQIEAAEGTVIYTIKGEKPGTVQMKNLVEAISKSIVKS  
LAVQLYQVDLFINDTWIATLLRAADDVYVDAREGREAVDHVIERDTELELAPQKDIIRRKIRIYTPAAP  
SAVVIWDPAIDREDRADAQGTILKIYGPDLQDISCFTDIGSEPKIESLKAWDEKE-YVVHRDDIPDDI-  
TMVGKSAHVNKEFGIPDVEVCAPAKPGVTESIDRGEPKAGTCGEVANLPYPQESLVNVRVSSANVQKN  
ISMVLGGHPVGEMGISREVERHLETNMCELFVDSPDVDVALDFYRLALT-

LRVGLDRPNAKVEIDGKESRKLMAVLDDGGADLQRHPKVSEAAGTRVGAGRKARLPDDTLIYDGV LH  
GDLSFTVTDLPEGRV-  
VTPVTIKVKAQLKIDKVLIKTFHVVTLSFSSQKGEEHLIKRLNALKKSTRHYEMLLKIRDTECAQSPHAIP  
VGKILKIDKLLQTICVAHYTAIEPLLADDLTALGVKGDQGLLHVVPRLMILAVMTLWGLEATLTWPRW  
GLMARRLVTDVTMGLAMRERHWSY-CISEVVGNTFFARTKDDDTTERLHARNPI-VLL-YGKFGMT-  
ISPSGLKMASTAPSTAIEHGNDILLILSAERLQDTMSYFVLRLVLLVFVDEVILAYGSGDTPRLFLVAHQAV  
TGRANPQLVCLTRRTFPLDCQRDIVFVLVFEDSTMKNLSHKKMHMNLVIIKSGWI-----  
-----  
IVLVVSQKPTAPSKTMFLEALNLYDEVTCTVQNRPKRYIIFEGDLISVVGSDAAVLRGMQRPQPDR L  
RRAVVAAAIRLAIASLAAEVLDDLEAGLLNFARAVSTAV-VYGAPQE--  
GVVVPMATVEFRVRNHKVSTKRSRPYKAHPKVLMSDDEKKLIADGVDTLA  
>GCA\_000161775  
AVIKPVTQDVYAPVLLIRQQEVATVTGAGSPSLRAKTVYRKSGLQRKTITKWVAKPLYY-  
GVLKMGNIQVLSISVDNRSVCTVAQVVEQEVVHGLVALDAVKRKIALEAIDGMTTEDPAKVAEFE  
EELDLRKFRDADARADMLPVMGLTLKIKFDPHEPVVHDLPIPIYIEVI-  
GIMADKGGIEVDDCAISNAVSDVDPIAYVSPIDLEAVAGEQMAFIDQEA AVAAAREAI AEELALEAGI  
LVVGISPLLLPV-FGEDGDV-MSFANRSRTLESIVALAVAYPQLTRARIDG-IASAM-  
MQRAQAAALAEKRGTAEEIRIVKRMQRSSGLADDPELVILEDAAEGNSSWAGQIYDDPVSGSSES DS  
AGNIVYAANKRQNYARSITFLRKVEISDKAAAPLMRGVKHNAKSRSARKIDDSIAELNFPNVPVGI AIR  
AEAGKSDDVLLHDATEGEEILLVIRWHVTWKTAVVLLVFTAGDIVGLIAIGGIAAVGKPDGLLNRHH  
KLNGLSIEQRPIVEKLT LRLRAALKEKLGKDQIIIFVVKVQGD LVADAKVQMG-  
GPVGAIVAIQGDVIFVRRHKQTVITDQESTV-ILKGVAEGPADAQALLRIRVTHTLVELSVLLIPE-  
PVLVDSVSIREGVGKALQIIQLDVYLLRDMGTGEETLAESKSRELIREVLAVDPITGVRLAYGKIKERM GK  
KVGLKDLET----  
ISILCAVTEPRMENLPEGICRTFIVAGPRAAVGMLFLLDDAGKLYAIDGDLRELLKS VKSLIGLVDAKAP  
KVLSASYAEERLKIRFADCEVLAAEADLYAYKEERRELLRMVPVYIIIEAKRRQLVIFALSLKGGHRR TMM  
ALGVMIAAAILESQAEGKPVHHQEPVLLDDAEVVGSSVMISRQASLDIKQFTKVDVIVIFPEFQEKMV  
VSLKFFCTDVAIFVIALIVTVGEMLSREPDHALEQGAGFQKRIRGHSVLFALAVTFDRRNRTRDALGPDL F  
LEMGLADPRYGILYVNQPKKKQMPTEPDSDRVDGFDLVHAVKEDKASNHELEMPEAMALAVE-  
DATINLSAGVLALSGGMVAVEKVDSKRKVALAATKWNISRLSALDVRLSGAWPFRSTGNIELADLSAA  
LSRKKL-  
FLYLPGASNAELEEELKDGAGASTAEAAADKQVAILLVRPVLVVIQDSNTAGLIANGGLDEWGT MAY  
KKHYAFAARMRLHMRTID-----QLAPNKQKA EKVKTVKLEGDTRFRQLAVEGIKEQMP-  
LHALNPDFVV-LPLLVTAVGSVAADENVLGADV PVDASL-  
RELQKSQKGAALPISGIRLLAMRAARAMIEEDIMVAGKIAA-  
LLKIRALETVADIVLRNDSEATIPWRLSVAKKLEADTKRGGG-----  
-----  
VEGIAIQLILTNPHSRVGTAKRAGEGHLHEMAKELLAKAVLMLRNEPGTNTGELLNYLTNNQPTDLLFE  
DCLDVIIDIRRM SVV-----VHLNTV-  
HVVVKGVCDVGDYEIMAAAFPSGLVQIERVDDRTG-----  
-----INRAFS LKRLQLDGWPKEAARWWNTWQLWLNKDGFFGYEAA FRA-  
KQVLKATLADFEMSDIEGVGRYLSKQEV RAGYRIREQVEFARLDPRTDILLQAQTRLSIIRHALKVVA ILI  
LRDVAPEFT-  
VVAYQDVARGHVECVLAECFEFTEKNAHIGPVGLRTPETIFGDGTVLKEAVLGKIDLANTVAEF RYLV L



VDGGRELGVWLSI-NMLYPRIWLPPAQAAKNLLPIKFFLQHPELDL-----  
ISKARADKLMAGALVEEILDAVARFAEPEATTHQSKKAKHFKYYGEEVDPVHLAYILDIFVLVSTQVTVS  
DRLLKDRYVLNLKVFRGFTSLWWLAAQLAMKGPSATVITVGTIAGLGALVLFILL-  
RDSVLVETLYHRYVY--MKGYTAAKDVADADPEHFLVAAAASRDLEWIEIVPAFFYYFKTAG-  
FEPFNTAKAKEFFGLFEERLRVIEVLAVPPDRVEALTEFVALAGTLPTSQA-  
PGVIATGLCEPNAAAVLEAERDWNLHRSMGITLAFFEARESVKGYFDKGLHKDVAETSLREAGALTTH  
FHCGKEAKRCVPAVHRVLDLGEIEASLIEIDSAVTVADEEQTLADKPTTRDKAVGAVGGVVLATGMN  
MGANLDSVERSGNIIIEEEHYHAVNGKKANGKLTDKVLMVLSLAYFPVITRPASANAMDRGVFYLLI  
AAPEDADNLDHGGVMSIPAPTVLTETTPLYAAEIDRIAWIAPLHLLGTLPAVLGFEPDQYSFISMMIE  
ASLEITETAEVLLDDYHVLEKGSRPAPFRIVLIKGLHIRLLAAVGTLVVGSGAGRAEITAYIQGQAVPITLRK  
HTFLPAFAPSSCKVVDIMSTMLRPPERSTVEMLILETVAEI-  
LEATRGENEKLERMQVLLPGLDVATLLGLVAAAEDFSDIVTIDAAITAILSVAEEVVLREMLLTAKAEIAT  
ALALALALLMLTGDKGLTQKERAREAQMKELIQSGAVLQVHADDAMVLAATADKVRLDTDEGTTS  
AFASLNLATVSDGFYVLSSAVLQLSADLMMIVAVARVLADKETKNALVVRHPEQVKTQPTYAEGSPG  
MVLQTLTQCIPPLAVKAEVEELLWTLVAALWQAKAHLASAARPRTERVLILLALGLIVVLMQSEGGG  
MGGG-  
MGSAAKILACFSILTAKAAVGDEVKVTRRVMDLNSRLGRPEEAVNPEFKGEELDQTKYEAENVEVDC  
LETIRRFVDIPFLVSIRTQHNESEDRGARMVLDVTRVRFDL-  
VTKKSDVILVERVETDGIARQMAKDMQSLHPE-  
AALGKVAALDHFISLSDGHISNYITAAINSVLGMLLLIFIQQVRVAKVWVPTRRVETMVFIMAALAVFF  
LVIGLLINLVFMVGGISPLQITTLVLGEGVMAVRNVSTFPAES-  
ITILQNTYADLICAGRVTKADIEASLHIVVAARVARGTWYVIYHYEISQAQAPAGIIRQAFRQATLSQSLI  
DGRMEVKIKVVTSDRYA-  
TYEIKGGQHRKGTRYNRVKVGHNIPVDVLARLKMAFSPPNLVLVKTFGAVVQKRFAQQQLTHIRHGAV  
TIGPMEVSSPYIKSKKARHAPGDSVVDIKPDNIVRSVAVPELIWARENEDQSAVHEKYVKTTHKVAA  
KRNRAVDKAQYDKRNQVHLSFIGLAVKVLPKA-----  
--  
RMRPQLNLAGKTDNKVVKCLNNNLDDVEWGKLGRRKIPITIKSVYDVEHKRATELVKLMPIYKDDVE  
GRKSQFAEK--  
ALFEPLKAFMMLFGFIARAVYALSLRVVRTILLVKTIVVNAKTVLSAIIIGVSIRLRHKSTNVADTKHHI  
KTIEARARMTLAGAPAVKLHLRPGRVGKKGGRIGYMPYKNFNIFDGLASGRRAKVKEKAKLKKVDKVI  
TVDGIRTRQQGGRIPKADLSNAL-  
NTRVGVDIVGENVQEASNPRANAEMGQIFAAIDARVYSLVAALIGHALEAVLAVCAILGIGRAHALLA  
V-LKINAGIELHSA-AVEAVAAA-YAQPGEAAAAIADVSEGLGMLALTEESLDVCRLRRRQLG----  
-----  
RHGIKAKGTYGKERAMMQITPTKPVKVVVPVFNDEELLAPIRAVAETNGDGVVVKLSNDIKITMFE  
KGVASLAISGKATTVVYTVLEKVTLSKDIYEQRAKAHYGRRLRSHVTTTKQKRHLMSMIKRTVVASP  
RLDAARLVDGEVSVVTGATMAFVMSEQDAV--  
GDVDMHFHEEPRREAQLGIAGPETFLATEQPRALALLFLREYLIHIVIDITVGGFADAATIIDILRAMQ  
NKLDRKLSADIAK-----  
GDPILSAYWINGVPANADIILLVANLECHTAPENIDCAVRLFYQRITLQAKERGGDVSVLVPAQNQIE  
AAEGTVIYTIKGENPGTTQMKLITIEGISRSIVKSLAVQLFQVDLFLNDTWISTLLRAAQDVVFDAREGK  
EAVDHVVERDTELEVGPQKDILGRKIRVYTPAAPSAVVIWDPAIERA-----  
DLQDIACFTDIGSEPKIESLKSWEDEKEYVVHRDDIPDI-

TLVGKSSKVNKEFGIPDVAVCAPAKPGVTESIDRQEPKAGSCGEVANLPYPQESLVNRVSSANVQKNI  
SMVLGGHPVGEMGISREVERHLETNMCEIFVDKADVDVALDFYKLALTALRVGLDKPNAKVQIDGKE  
SRKLMAVRDGEADLQRHPKVSEESGTR-KAGEKAKLPDDALIYDGVQHGD LKFTATDLPDGRV-  
VTPVVMRVKAQLKIDKVLIKTFHVVTLSFSNDKGEEHLIKRLNALKKSTRHYEMLLKIRDTECAQSPHA  
IPVGKILKIDALLQTICQAHYTEIEPLLADDLTALGVMGDQGLLHVVPRLMILAVLHLIDLEAAKLIPKWG  
LQQRAIITDQTMGLPARQRDWSF-AISEVVGNTFFARTKDDDETEQRLHARNPI-VIL-YGKLG MV-  
ISPSGLHLNSTKPSDQQHGNTQKLILSKERLQDAMYYYILKVLLVFVDELILAYGSGDKPLKFLVAHQA  
VTGREN PQLVCLTRRTFPLDLQRDATFVLVVEDSTMKNLSHKKMHMNLVLV PKPSWVENVSTKILIS  
DQAIASAY AEDAGAHTQPSESALAVITSRVIAPIVLVVSQKPTAPSKTLFLEALNLYDEITATVLKRPKRYFI  
FEGDVVSVLGTMDAAVILGMQRPQPDRLRRAVTAAAIRLAIALRASGIIASLDAGLINFRAVSLAA-  
HYPGVQALADP-----AFRVRNHKTSTKRDRPYKGHPKFLHKADEEKALVAEGVDTLA  
>GCA\_000161815  
AVIKPVEINKYAPVLMIRQTQVATVSGAGSPSLRAKTVFRKSGLQRKTM TKWVQSPLY-  
GVLKMG NIVQLVSISVDNRAVCTVAQVVEQEVVVHGLVALDAVKRKIALEEMDGMTTEDPAKVAEF  
EEELDLKRFRDADARADMLPVM LGLTLQVRFPHEPVVHDLPIPIYIEVI-  
GIMADRGGIEVDDCAISNAVSDVDPIAYVSPIDLA AVAGEKMAYIDQEA AVGAAKEEIALEELAESV  
LVVGI-PLLLPV-FGAEGAV-MSFAARSRTLESIVGLAVAF AELTRA-ID-GIASAM-  
MTAAQAEALAEKRGTAEEIRIVKRMQRSSGLADDPDLVILEDTAEGKASWAGQIYDDPISGSSES  
GNIVHAANKRQNFARSITYLRKVEISDKAAAPLMRGVKHNSKSR SARKVDDAIADLNFPNVPAGIAIK  
AIAQKPEDRLLHDATETEGILLIVVRWHVTWKTAIAIGLTF LAGNIVGLIALGAIAGIGKPDGLLN RHHLK  
NGSLIEQRPIIEKMTLRLRASLKEKLGKDQIIIFVVKVQGD LVADATVQMG-  
GPVGAVVAVQGDVIFVRRHKQTVITDSESTV-ILRGVAEGPADAEALLRIRVEHTLV ELSVLLIPE-  
PVLVDNVSIREGVGKSLQIIQLDVYLLRDMGTGEETLAESKSREVIREVL AIDPITGVRLAYGKLKERAGK  
KTGLKDLETLF-----  
GKLYPIDGELRELTKSVKSLISLVD AKAPKVL SAGYAEERLRIRFADCEVLASEAELYAYKDERREMLRMV  
PVYIINEAKRRQL-----  
RAMMALGVMLAAAIIESQA EKGAVHHDEPAILLED AEVTGTSIMVSRQASLELKHVSKVDVIVIFPEFQ  
EKMVVSLKFFCTEVAIFVIALIVTVGDMLSREPEHAQEDGAGYAKRIRKHSVVF ALEVTFDRRNCRSA-  
LADLFLSLGLLPIRYGVLYTNQPKKKQMPSEPDGDRVDGFELVHAVKEDGSSNHELEMPEAMALAVE  
ATETINLSAGVLAMTGGMVAIERVDSKRKVALAATKWNISRL ELDDVTISGAAPVRCCD-  
IEEAGMSAALGKKKV-  
FLYLPGASNAEEEEKLGGAGNSTADVAEDRQREILLVHPVLVVIQDSNSAGLISNGGLDEWGT MAY  
KKHYAFAARMRLHMRTIE-----MEPNKQKSEKVKTVKLEGDTRFRQLAIEGVKEQMP-  
LHALNPDFAV-LPILVTPAVGSVAADAQVLGATVPVDASL-  
RELQKSQKGSALPISGIRLLDMRAARGMIEADIMVAGKIAA-  
LFKIRALETIIGIILRNDSEATLPWRLSVAERLEADTKRASGFAARPFKTKPSLCTTQAHARIADPIQEIAA  
GYVAADERFVFPVEDIAIRLILYNPHSRVGEKKRGEGHLHAMAKELLGKAVVMLRNEPGTNTEGLLN  
YLTTNQPTDLLFEDCLDVIIDIRRM SVV-----  
VHLN TV-  
HVVVAGVADVGDYEIMNAAFP SALIQVEQVDDRTGEEKTLMW MYGAMEELWLMSVRWADWVA  
DCAIGAILHVYAQTLNRAFSLKRLQLDGWAKEAARWWNTWQLWLNKDGFFGYEAA FRA-  
KQILKAALADFEMKDV EGVGRYLSKQEIRAGYRIREQVAFARLDPRTDILLQAKTRLSIIRHALQVVAILI  
LRDIAPEFT-  
VWAYQDVARGHVECVLAESFDFTEKDAHIGPVGLRTPDPIFGDGT VFKEAVLGKIDLANTVAEF RYLV

LDGGRELGVWVTLQNMLYARIWLPPAQAAALKNLQPICFFLQLPELDM-----  
ISKARAEQLMAGALIEEIEAVARFADPEATTHQSKKAKHFKYYGEEVDPVHLAYILELFALVATQVVL  
DRLLKDRYVLNLKV-  
RALTSLWWLSLQLAEKGPCATIISVGTISGLGALVLFILLMRDSVLVETLYRYVY-  
VMRGYSAAKDVQDADPEHLELAAASRDIEWIEIPAFFYYFDTAT-  
FEPFNTAVAREFFGLFKERLRVIEVLAVPPDRVEALVEFVALAGTLAVSAEALPGVIACGLCEPNAAGVL  
EAERDWNLHRSMGITLAFFEARDSVKGYFDKGLHKAVAEFSLKEAGAMTTHFRCDVEAKQVPAVH  
RTLDLGEIAALIEIDSAVVVSEEEQTLADKPTTREKSVGAVGGVVLGTMNMGANLDSVERGGNIIIE  
EEEQYHAVNGKKSEGKLTDKVLMVLSVAYFPVIARFASANALDRGVFGLLIDAPTDADNQDHGREMS  
IPAPTVHAETAPLYAESDIDRIAWIAPLHLLGTLDVLLFEPDFQGFISMMIDASLEIMETAEVMEDYHV  
LEKGARPPGFRVVLKGLHIRLLAAVGTLLVVGSAGRTEVTAYIQGRAVPISLRKQTFPLPAFAPSSCNV  
DIFSTLLRPPERSAVEMLILETVAEL-  
LEVTRGSNDKLERMQVLLPGLDMAELLELLAAADDFADIVTIGAAITAILSVAEEAVVREMLLTKEAIAI  
TALALAMALLMLTGTGTQKEAAREAQMKDLIQAGSVLQLHAADAMVLAATADKVRLSTDEGTT  
SAFASLNLATVSDGFYVLSAVLQMSSDLMMIVSVARVLADKESKNALVVRHPEQVKTQPTYAEGSP  
GMVLQTLTGCIPLAIKPEKVELLWTLVAALWKAKAHLASAARPHNERVLILLALGLIVVLLQSEGGG  
MGGG-  
ATAAAKVLAASFILTLKAAVGDEVKVTTRVMDLSSRLGRPEEAVNPEFKGEELDQTKYEAENVEVDC  
METVRRFVDIPFLVSIRTQHNESEDGRARLVLDVTRVRFDL-  
VTKKS DVILVERVETDGIARQMAKDMQSLHPEAAALGKVSALQHFIALGDAHISNYVTAATHSVLG  
MLLLVLFIQQVRVSKVWPTRREVTMVFIMAALAAFFVIGLGINIVFMVGGISPLQITTLVLGEGVMA  
VRQTSTFPAES-  
VTILQNTYADLICAGRVTKADIESSLHIVVGARVARGTWYVIYHYEITQAQGPAGIMQRAFRQATLSQ  
SLIDGRMDVKIKVVTSDRYA-  
TYEIKGGQHRKGTRYNRVKVGHNIPVEVLARIKLAFGPPNLVLVKTFGAVVQKRFAQPLTHMRHGAV  
TIGPMEVSSPYIKSKARHAPGDSVVDIKPDNVVRSVAVVPELIWARENEDQSAVHEKYVKTTTHKIAA  
KRSRAVDKAQYDKRNQVHLSFIGLAVKVLPEQAIVEASAGTLLPTESEAVTENLKGVAATIRLDPMEKA  
LIAYIKRMRPQLNLQGKTDNKIVKCLNNNLDDVEWGKLGRRKIPITIKSVYDVEHARATELVKLMPYK  
DDVEGRKSQFAEK--  
ALFEPLKAFMMMFGFIARAVYALSLRVVRRITILLVKTIVVNANTVLSAIIIGVSIRLRHKSTNVAETKH  
HIKTIEARARMTLAGAPSVKLNLRPGRVGKKGRIKGYMPYKNYNIFDGLASGRRAKVKEKAKKKVD  
KTIKAVDGIKTRQQGGRLPKADLSNALSNTVDVEVVGENEQEESENPRANAEMGQIFAAIDARVYSLV  
AALIGHALLAVLAICSILGIGKAHVMLAVKLKINAGIEMHSAA-VAAAVAAA-  
YSQPAGEATAIADVSEGD LGALAITEGSLDVCRLRRRQLG-  
LKKTKKEAYMSLTCFAGKGDVKIIEATQTQAVEIVATRTAERHGIKAKGTYGKERAMMQITPTKPVKV  
WVPVFNEDELLAPVRAFAETNGDGVTVVKLTTDVKITMFEKGVASLAVTGKVTTLVYTVLEKVTLSK  
DIIYEQRAKAHYGRGRLRSHVVHTKQKRHLMMKRTVVADPSMDAARLTDGEVSVVTGATMAFV  
MSEQDAV--  
GDVDMHFHEEPRREAALGIAGPETFLATDQPRLLALLFLREYLIHIVDIDTVGNFSNAATIIDILRAMQ  
NKLDRLKSADIKVRMCLSDDVADMGVTDAAARRDTAGDSILSAYWINGVTANSDIILLVANLECKT  
APENIDCAVRLFYQRITLQAKERDGDVSVRLVPAQNQIEAAEGTVIYTIKGNPSTAQMKNLIDAI  
SRIVKSLAVQLFQVDLFLNDTWIATLLRAEDVVYVDAREGREAVDHVVERDTELELAPQKDIISRKIRIFT  
PAAPSAVVIWDPAIDREDKADAQGTILMIYGPLQDISCFTDIGSEPKIESLAAWDEKEYVVRDDIP  
EDI-

TLVGKSSKVNKEFGIPDVAVCAPAKPGVTESIDRQEPKAGTCGEVANLPYPQDSLNVNRVSSANVQKNI  
SMVLGGHPVGEMGISRDVERHLETNMCEIFVDKDDVDVALDFYKLSLTPLRVGLDKPNAKVQIDGKE  
SRKLMAVKDGEAKLQRHPKVSEESGTR-KADDKAKLPDDALIFDGVQYGDLSFTATDLPEGRV-  
VTPVFNNVKAQLAIDKVMLKTFHVVTLSFSNDKGEEHLIKRLNALKKSTRHYEMLLKIRDTECAQSPH  
AIPVGKILKIDSLLQTICKAHYTAIEPLLAEDLTALGVMGDQGLLHVVPRLMILAVLHLLGLDARGQLST  
WSLQEAAIVTDQTMGLAIRDRAWSF-AISEVVGNTEFFARSKDDDTEERLHARNPI-MIL-YGKEGML-  
ISPSGLKLASTQPSDDEHGNKNKLILSTERL-----  
LLVFDDEMILAYGSGEPLKFLVAEQAVTGRANPQLVCLTRRTFPLDLQORDAVFVLVLTDTTMKNLSH  
KKMHMNLVLVKPSWVENVSTKILISDQAIASYAEDAGAHTQPSSESALAIITNRVIAPIVLVLSQKPAA  
PSKTMFLEALNLYDEITATVAKRPKRYFIFEGDVISVNLTLDAAVILGMQRPQPDRLRRAITATAIRLAIA  
LRGSGVLAQLEGGVINFSRAVSLAAKVYDALNLLARAAIPLPALDFRVNRHKTSTKRDRPYKGHTKFLH  
KAEEEEKALVAEGVDTLS  
>GCA\_000161835  
AVIKPVVQNVYAPVLMIRQTQVATVSGAGSPSLRAKTVYAKSGLQRKVETKWVASPFYY-  
GVLKMGKIVQLVSISVDNRAVCTIAQLVDQEVVHGLVALEAVKKKIALEAIEGMTAEDPAKVVQFEE  
EELKRFRDADDRADMLPVMGLTLKIRFDPHQPLVHDLPIPMMEVI-  
GIMAQKGTIEVDDCAISTAVSDVDPIAYVSPIDLAAVAGDAMDYIDQESAVAAAKDAIALEELALESG  
VLVVGIKPLLLPV-FG-DGDT-MSFANRSRNLASIVDLAVAYPEITRARISD--ASAM-  
MMRIQAAALAEKRGTAEEIRIVKRMQRSAGLADDPDLVILEDAAEGNSSWAGQIYDDPISGSSES  
AGNIVFAANKRQNFQRSITYLRKVEISDKASAPLMRGVKHNAKSRRSRKVDDAIQVLNFANVPEGVAI  
RAEACDDDALLHDATETEQILLMIVRWDVTWKTAIFILVYLAGGIVDLITLGGIAAVGREGLLNRH  
HKLNGSLIEQKRIIEKLT LRLRAALKQKLGADQVIIFVVKVAGDLVATATVQM---  
SVGMVVAIQGEVIFVRRHKQTVITDSEATVEVLRGVAEGPADAEALLRIRVEHTLVKLSVLLIPE-  
PVLVDSVTIREGVGKALQIIQLDVYLLRDMGTGTETLAQSGSRELIRDALQIDPITGVRLAFGKIKERLGK  
VTKLKD LK-----  
LALQAGVTEPRMSTLDDGVRRDYIEAGPQAAIGMLFLILDDAGKIY AIDGDLRENTKSIKSMIGIVDAA  
TPKVL SAGYATERL KIRFADCMVLTSDADLYAYAEERKEVLRMVPVYITNEAKRRQLIIFALS LKGGHRR  
AQASLDVLLPATILESQTEEGTVNHDPVILLADAEIVGSEMMISRQAALDVKSIFKIDVIVVFPEFQEK  
MVVSLKFFCTEVAIFVIALIVTVGSMLSREPEHAQESGAGFQKRVRAHNIFGLEAVFDRKNLRDA-  
AADLLLNLGLAEPRYGLFYVNQPKKKQMPSEPDKDRVDGFDLVHAIKADGAS-  
EELEMPEAMALAVE-  
DASINVSGGVLALSGDMVAVEKVD SKRKMALAVEKWNIAKLTIEDIHLSGASPIRALGSIEQASLSAAL  
SAKSIRVLF LPGASNKEEEDKLNGAGSSSAEAAEDRQTAILLVKPV LVVIQDSNTASLIANGGVDEWG  
TMAYKKHYAFAARMRLHMRTID-----MVPNKQKAEIKTVKLEGDTRFRQLATEGVKEQMP-  
LHALNP DFAVLVPVLVTPAVGSVAADTGVLGARVPCDFSL-  
RELQKSQKGSALPIAGVRVMGVRAARAMIDEDIMVAGKVAA-  
LLVIRALETIADLVLYNDSEATLPWRLSVAERLEADTKRAGGFASRPFNSKPSLCNTQAHANVADPIETI  
AAGYVAIEKR FVFPVEGIAIQIVLASPHSRVGGAKRAGEAHLHEMAKELLAKAVLMVLNEPDTNTEGLL  
NYMTTNQPTDLLFEDCLDIIDMRRMSV-----  
VQLNTV-  
HIVVPGASDLAEREIMAADADSGLVQVERVDDRTGRERTTMW MYGAMEELWLLSVTYADWINCA  
IGAI-----INRAFS LTRLQLDGWPPEADRWWNTWQLWLNKDGFFSYEAAFRA-  
MQVLKAELYFEMSDVKGVG RYLSRQEIRAGYRIRQQVDFARLDPRTDILLQAKTRLSVIRHALTMVAI  
LVIRDVAPEFS-

VVAQEDVAMGHVECVLADCFDFTAKNADIGPVGLRTPSPILGDGTVFKDAILGKIDLANTIADFRYRFI  
IDGGRALGVSWMPFMNMLYARIWLPPAPAKLKDLQPIKFFLSHPELDM-----  
ISKARAQKLMASALIEEILENVARFADPEATTHQSNKEKHFKYYGEEVDPVFLAYIFDATAALVATQVTVS  
DRLLQDRYVLNLTi-  
RGFTSLLWLSAQLGNKGPAATVITVGTIMGLGALVVFIILLRLDVLLETLYRYVY--  
MQGYSAAKDVADADPEHFLSLAAASRDIEWIEVIPAFFYFKTATSRTTKNAANARTYFGLFKERLRVI  
DVLVAPPDRVEAIVQFVALAGTLDTSADAVSGVIAIGFCAPNAASVLEAEQDWNLHRSMGITLAFYK  
AQKSVSGYFDKGLHKEVAQTGLSEAGALTSNFLCGATARRCIPVVHRVIDLGEIEAALIEIDSAVKVADE  
EQNLADQPTRDNSVGAVGGVVLGTMNMGANLDTVERGNIIIEEEESYNAVNGKKAAGKLTDK  
VLMVLSRAYFPVLEQIASANS�DRGVFGLLIDAPNDADNLDHGGDTVIPAPTIHTETPLFAESDIERIA  
WVAPIHLLGTLQAVLGFEPDQYSFISMMIDASLDITETAEVMLDYHVLEKGARPSFFRVVLKGLHIRLF  
AAVGILVVGSAGRTEITAYIQT-AVPITLRKDTFLPAFAASSCIAIDIFSTMLRPPERSTVEMLILETVTEL-  
LEVTRFENDKLERLDALLPGLDVADLMRLVAAAKDFSIVTIDAAITAILSVAEEAVVREMLLTAEIAV  
TALALALALLMLTPDRGLTQKEVAREDQIKELIQGGTVLQVRAADKMVLASTADKVRLDTDEGTTSA  
FASLNLATVSDGFYVLSSAVLQMSSDLMMIVAVARVLADKETKNALVVRHPEQVKTQATYAEGSPG  
MVLQTLTDCIPPLAIKPEDVELLWTLVAALWRVKAHLANAARPYEERVLVLLLALSIAVLLQSEGGGM  
GGA-  
SSAAKILAAFSVLTIKASVEDEVKVARVMDLNSRLGRPEESVAPEFRGAELEQVKYEAENVEVDCME  
TVRRFVDIPFLVSTRTQHNESEDGRARLVLDVTRVRFIDL-  
VTKRSEIILASRAETDGIISREMAKDLQALHPEAAALGKIAALQHFIANDGHISNYVTAAINSVLGMLLL  
VLFINEVRVSKVWVPTREVTMVFIMAALAVFFIVIGLGVQIVFMLSIGISWQQITTLLVLEGIMVVRQT  
STFPADA-  
IGILQNTYADLICAGRVTKADIEASLHIVVGARVARGTWYVIYHYEITQAQQQSGIMQRAFRQATLSQ  
SLIDGRMEVKIKVVTSDRYA-  
THEIKGGQHRKGTRYNRVKVGHNIPVDVLARVKMAFGPPNLVLVKTFGAVVQKRFASPLTHMRHGA  
VTIGPMEVSSPYITSKKARHAPGDSAVDLKPDNIVRSVAVVPELIWARENEDNGAVHDKYVKPTHKT  
QAKRNTAVDKAQYDKRNQVELSFIGLAVKVLDPQAIVDATSGTLLPTESEAVTEGLKGVAATIRLDPM  
EKALIAIYKMRPQLNLAGKTDHKIVKCLNNNLDDVEYGKLGRRKIKPLTIKSVYDVEHRRATELVKLIPY  
KDDVESRKSQFAEK-  
LALFEPLKAFMMVFGFIARAIYALYLRVIRRTIVLAKTKVIVNAATVLSAIIIGVSIRLRHKTNNVADTNH  
HIKTIDARARMTLAGTGNVKNLHPGRVGTGGRIKGYMPYKNFNIFDGLASGRRRAKVKELAKLTVD  
KTISVDGIRTKQQGGGRIQAALSNAIANTRVGVDIVGEDEQEEENPRANAEMGQIFAEIDARVYHLAA  
AMIGHALEAVLAVVSIWGIGQAHVLLAIKLNINAGIELHSAA-VEEAVAAA-  
FAQSGGEVSFIADVSEAYLGALSVSTESLDVCRLRRRSLSELKKTKEAYMVLTCTFGGKGDKVKIVEATQ  
TQAYEIVATRTAERHGIAKAGTYGKERAMMQITPTKPVKVVVPVFVAEPELLAPVRAFAETNGDGVT  
VVKLVKDIKVTMFEKAVASLSVSGKCTTIVYTVLEKVTLMKDIIYEQRAKAHYGRGRLRSHVVTHSKQ  
KRHLMSMIRRTVVADPSMDAARLVDGEVAVITGATMAFVMSEQDAV-  
PGDVMHYHEEPPREATLGIAGPETFLTTEQPRVLALLFLRAYLIHIVIDIGTQGGFADAATIIDILRAMQ  
RKLDRRLSAEIAKVRMCLADDVTEMGVTEVAARRETAGDPILSAYFINGVTANADIILLVANLECKVVP  
ENIDCAIRLFYQRITLQAKERGGDVSIIVPAQNQIEAAEGTVIYSIKGNNPSTSQMKNLVEAISRSIVKS  
LATQLYQVTTFLNDTWIDTLLRAAQSVFVDAVEGKEAVDHDHIERDTELEFAPQKDIVSRKIRIYTPAAP  
SAVVIWDPAIEREDKADAQGTIIKIYGPNLQDINCFTDIGAEPKIESLKAWDEKEKYVVHRDDIPEDITL  
VGKSSKVNKEFAIPDVAVVAPAKPGVTESIDRGEPKAGSCGEVANMSYPQESLVNTVSSANVQKNIS  
MVLGGHPVGEMGISREIERHLETSMCEIFVDKDDVDVALDFYRLELTPLRVGLDPPNAKVEVDGKESR

KLMAVL DGEATLQRHPKVSQESGLTRNAGEKARMPDDTLMRDGVQHGDVGFTSTDL PDGRV-  
VTPVFNDVKAQLKIDKVILRTFN VVTL SFSNNKGEEHLKRLNALKKSTRHYEMLLKIRETECAESPHAI  
SVNKVLKIDALLQTICTAHYKAIEPLMADDLTALGVMGDQGLLHVVPRLMILAVLLAWGVEAIALVET  
LEFQRDALVTDVTMGLVFRARDWSY-AISEVVGN TFFARTADDDTEQRLHARNPI-MIL-  
YGKEGML-  
ISPSGLKLKSTADEAQEHGNADAMVLSTERLQDAMEYFVLHVLLVFVDEVILAYGSGDEPLRFLVAEQ  
AVTGRDNPGMVCLTRRTFPLDLQRDAVFVLVFEDSTMKNLSHKKMHMNVLVIKSKGWVNVNSTKILI  
SDQAIASYAEDAGAHTQPSALAVITSRVMAPIVLVVSQKPTAPSKTCFLEALSLEEVSATVLNPKPK  
YYIFEGDVISVLKGLSASVILGMQRPQPDRMRRAVVASAIRLAIAVKASGILTSLEHGLVNF SRAVSLAA  
GRYPEQEGLPVAIMT-TALAFRVRNHKVKTKRARPYKGHTKFLHKADLDKSLIADGVDTLA  
>GCA\_000169415  
AVIKPVIQDVYAPVLLIRQQEVATVTGAGSPELRAKTVFRKSGLQRKTSTKWVAKPFYF-  
GVVKMG NIVQLVSISVDNRAVCTVAQLVEQEVVVRGLVALNGVKKKIAVEEIQGM TTEDPAKVVEFE  
EEVDLKRFRDAADQADLLPVLLGLTLDVRFD PHEPVHDLPPVPVIFEVL-  
GIMAERGGIEVDECAISTAVSDVDPIAYVSPID--  
VVAGEKM VYIDQEA AVAAVKDEIALEELALESQVLVVKI-PLLLPV-FGEEGAN-  
MSFANRSRLLSIVGLAVGYTPITRAR-ETGIVAEM-  
MDAAQAAALAEKRGTAEIRIVKRMSKSAGLADDPDLV LLEDASEGKANWAGQIYDDPISGSSSDS  
LGNIVYAANKRQSFARSITFIRKVEISDQAEAPLMRGVKHNSKSRAARKVSDGIAILNFPNVPHGLALR  
AEQDKSADTLLHDATEGEGILLIVKKFVTWKTAIICLPSTAGDIVGLITLGGIAAIGRPDGLLRHHL  
NGSLIEQKRIMDKLTLRMRASLKEKLGAESVILVVKVAGDLVADATVQM-  
GGVVGAVVAVQGELIFVRRHRQTLITDSESTV-ILRGVAEGPADAQALLRIRVDHTLVELSVLLIPE-  
PVLVDSVSIREGVGKTLQIIQLDVYLLRDMGTGEETLAESLS-----  
-----  
GRIYEIDGDLRELPSVKSILGLVDAKAPKVL SAGYLTGRLKIRYADCTVLESEADLYAYAEERKELLRMV  
PVYIITEAKRRQLVIFALS LKEGHRRAAAIRVLLAAVLLESQAEQGTVHHQTPNVLLDNAEVVGSSVM  
ISRQASLELKS VQKMDVVVVFPEFQEKMVVSLKFFCTDVAIFVIALIVTVGDIISREPDAAQEGGAGY GK  
RIRGHSM L FALLATFERRNLDDA--  
PSLFLGLGLAAPRYGVVYTTQPKKKQMPSEPDTDKVDGFELVNAIKEDGRSNHELEMPEAMALAVE-  
SAPINLT-----KWNISPLDALDLT LSGARPVRATE-  
IMLADLTAALQMKKVRTLYLLGASNAELEDRLGGAGNSTADVAADRQRTILLVHPVLVVIQDSNAA  
GLVKNGGVEEWGTMAFKKH YAYAARMRLHMRTIDAIEVGVEMEPNKQKSEKVKT VKLEGDTRFRQL  
AVEGVKEQMP-HHALNPDFAV-LLVLVTPAVGQVAADAGVLGARVPVPFSL-  
RELQKSQSGQALPISAIRLLAMRAARAMIDEDIFVAGKVAA-  
LLKIGALETVIGLILRNDTEAWGPWRLSVAEKLEADTKRASGFAARPFMTKPSLCNTQAHANVAEPIQE  
IAAGYVATEKKFVFPVEGIAIQ LILSSPHSRVGS AKRAGEGHLHEMAKELLAKAVLMLQNQPATTEGL  
LTYMTTNQPTDLLFPDSL DVIIDMRRMSVV-----  
VQLNLV-  
HVIIPGTRELGDRTIMAAAADSGLVQVEQIDERTGRERTKMWMYGAMEELWLLSLKWADWVVDCAI  
GAILHVYAQDINRAFSLTRLQLEGWPPEATRW WNTWQLWLNKDGFFSYEAAFRAMAQVLKAELLD  
YEMSDVEDVGRYQSRQELRVGYRIRGQVEFSRLDPRTDILLQAKTRLSVLRHALEV VAILVLREVVG EF  
SLVVAMEDVAMGHVECVLAESDFTEKNAHIGPVGLRTPAPIFGDGTVLKEALLGKIDLANTIAEF RYR  
MITDGGRKLGVTWVTLQNMLYARIWLPPAPAALKDLLPICFFLSHPELEL-----  
ISKARADQLMAGALVEDILEPVAIFADPEATTHQTHKEKHFKYYGEEVDPVHLAYILPLFALVATQVTV

SDRLLKDRYVLNLKIFRGFTSLLWMAAQLGEKSPAATIITVGTIAGLGALVLFILL-  
RDSVLLETMYRYVYV-MRGYQAAKD VADADPEHLEPLAAVSRDVEWIEIVPAFFYYFDTAT-  
FEPFNTAVARDFGLFAERLRLVEVLVPPDRVVELVEFVALAGTLSTSSEALPGIATGFCEPNAAVLE  
ADQDWNLHRHMGITLAFKQESVHGWFDKGLHKAVAETSLTEAGGFTTRNDCRVEAKQCVPAVH  
RVLDLGEIEAALIEVDSAVVVADEEQTLADKPTTREKSVGCVGGVLAGTMNMGGSLDAVERSGNIII  
ELEEEQYHAVNG-  
HKDDKLTDKVLMVLSAALFPVIARFGSANSLERGVFGLLIPAPSDADNLDHGRSMSIPAASVHAETHP  
LYAQADIDRIAYIAPIHLLGTAAVLLFEPDHYSFISMMIEASLEIMKTAEVLLDDYHVLDRGSRPPAFRVV  
LIRGLHIRPLSAVSTILVVGSA GRAEVTAYIQGRAVPITLNKHTFLPAFAASSCFVIDLFSTMLRPPERSV  
QMLILETVAEL-  
LDVTRGENDKLEKILVLLPGLDMAALLGLIAASDDFAGIVTLAAAITAILSVAEEAVVRELLLTAEIAVT  
SLALALALLMLTGDQGLTQREAAREAQMKELIQGGAVLQLHAADRMVIAATADRVRLTDEGT TSA  
FASNLATVSDGFYVLSSAVLQMSSDLMMIVQVARVLADKEQKNALVVRHPEQVKTOPTAEGSPG  
MVLQTLTQMPPLAIKPEQVELLWTLVAALWRAKHAELAEAMRPRRERILILLALGLIVVLLQNEGGG  
MGGG--  
GAPPKVLAAFSILTIKASVGDEVKVTTRVMDLSNRLGRPEEAVNPEFRGEELDQSKYEAVNEVDCLE  
TIRRFVEIPFLVSIRTQHNESED RGARMVLDVTRVRFIDL-  
VTKKSEILVERAETDGIARGMAKDLQALQPEVAALGKIAALQHYISLNDAHISNYVTAAIH SVLGMLL  
LVLFIQQVRVAKIVWPTTRREVSMVFIMASLAVFFLVIGL--  
NLV FVVGGISPLQITTLVLGEGVA AVRQVSTFPAES-  
VTILQNTYADLICAGRVTKADIENSLHIVVGARVARGTWYVIYNYEITQAQGEAGIMQRAFRQATLSQ  
SLIDGRMEVKVKVVTSDRYA-  
TYEIKGGQHRKGTRFLRVKVGHNIPVEILPRIKLAFGDPNLILVKTFGAVVQKRFAQPLTHIRHGAVTIGP  
MEVASPYISNKKARHAPGDSVVDVKPDNIVRSVAVVPELIWARENEDQSAVHDKYVKTHKTQAKR  
NAAVDKAQYDKRQQVELSFIGLAVKVLDPQAIVHATAGTLMPTAEAVVTEGMKGVAATIRLDPMEK  
ALIAYIKRMRPQLNLAGKTDKKIVKCLNNGLDDVEYGKLGRRRIKPITIKSVYDVEHREATELVKLMPYK  
DDVEGRKSQFAEK--  
ALFEPLNAFMMLFGFIARAVYALSLRVVVRTILLVKTIVVNANTVLSAIIIGIAIRLRHKSTNIADTKHHI  
KTIEARARMTLAGAPNVKLNLRPGKIGKKGGRIKGYMPYKNFNIFDGLSSGRRAAVKELAKLKKVDKEI  
QVEGIRTRQQGGRVPKADLSNAIANTRVGVDIVGENEQEDSNPRANAEMGQVFAAIDARVYHHVA  
ALVGHAEAVLAVVAILGIGRAHSLAVKLRVNAGIELHSAA-VEQAVAAA-  
YAQNGGEATALADASEAYLGALLLSAESMDVLRLRRRQLG-  
LKKTKKEAYMKLTCTFGKGEKVKIVEASQTQAYEIVATRTAERFGIKAKGHYKGERAMMQITPTKPVKV  
WVPVFVAEDELAPIRAF AETNGDGVTVVKLTDDVKITMFEKAVASLAVAGKSSTVVYTVLEKVTLSK  
DIIYEQRSKCHYGRGRLRSHVVTHTKQKRHL SMIKRSV VAKPRMEARLTDGEVSVVTGATMAFVMS  
EQDAV-  
PGDVDLHYHKEPRREAGLGIAGPETFLATEQPRVLALLFLREYLIHIVEINTTGGFNDAATIYDILRAMQ  
AKLDRKLSAEIAKVRMVLDHNVADMGIHQEAPRRDKAGDAIL SAYWINGVTANADIILLVANLECDC  
VPENIDCAVRLFYQRVTLQAKERGGDV SVALIPAKNQIEAAEGTVIYTIKGEKPGTVQMKNLVEAISRSI  
VKSLAVQLYQVELFVNDTWIAVLLRAADVVDVAVDGKEAVDHVVERDTELELAPQKDIVRRKIRIY  
TPRAPSAVVIWDP AIDREDKADAQGTILKIYGPLDQDISCFTDIGAEPKIESLKAWDEKERYVVRDDIP  
PDITTMVGKSSKVNKEFGIPDVSVCAPSKPGV-  
ESIDRQEPKAGSCGEVANLPYPQESLVNRVSSANVQKNISMVLGGHPIGEMGISRGAERHLETNMCE  
ILIDCPDIDVAMNFYRLRLT-LRVGLDRPNAKVTIGGKESRKLMAVLGDGAPLQRHPKASREAGR-

AVGAKAKLPDDTLIFDGV LHGDLSFTCTDLPEGRV-  
VTPVTIKVKAQLKIDKVILKTFHVVTLSFSNDKGDEHLIKLRNLNALKKSTRHYEMLLKIRDTECAESPHAID  
VGKILKIDKLLQTICKAHYKAIEPLLADELTALGVRGDQGLLHIVPRLMILAVMALWGLEAEMEWWPHW  
GAMAERLVDVTMGLQMRDRHFSY-CVSEVVGNTFFARTKDDDTDRRLRARNPI-VLL-  
WGKFAMV-  
ISPSGLRLDSTAPAETGHGHAGPLVLSAERLQDAMSYYYVLRVLLVFDVHVIIAFGSGEDPIRFLVAEQ  
VTGKENPQLVCLTRRTFPLDLQRNATFVLVFEDESIMKNLSHKKMHMNLVVIKPKGWIVNVSTKILISD  
QAIASYAEDAGAHTQPSALAVITSRVIPIVLVVSQKPTAPSKTLFLEALNLYDDITCTIQNRPKRYIF  
EGDLIAVLGAIDAAVLKGMQRPQPDRLRAVTAIIIRLAIASLSSGLLALEAGAINFARAVTFVR--  
YIQPTAAR-----AFRVRNHKVSTKRSRPYKAHPKVLMMKND-AKKLIAEGVDTIA  
>GCA\_000169435  
AVIKPVTMDTYAPVLMIRQQQVATVSGAGSPTLRAKTVYRKSGLQRKAETKWVSKDFYY-  
GVVKLGNIVQLVSISVDKRSVCTVAQLVDQEVVHVGMVALEAVKKKIALEAIEGMTAEDPAKVVDYA  
TEIELRKFRDTRDDRADMLPVMGLTLKIKFDPHQPLVHDLPIPVVFEV-  
GVMVQRGQIEVDECGVSTALSDVDPIVYVSPIDLAAGVAGDKMAYIDQEAHVTAAKAEIELEELALESK  
VLVVGI-PLLIPIV-FAADGDV-MSFANRSRTLKTIVNLAVSYPEIKRARLD-NIAADM-  
MDASQAAAAAEKKGTAEEIRIVKRMQKSAGLADDPVLEDAEAGNSNWAGQIYDDPLSGSSES  
SAGNIVFAANKRQNFARSITYLRAVEISDQAAAPLMRGVKHNAKSRSSRKVDDAIAVLNFPNVPEGIA  
IRAEAGKTQDILLHDATEGEEILLIIVRWVHTWKTAVIISLFPANNIVGIIEMGGIGAVGRKDGLLRHH  
KLNGSLIEQRRIVEKLTLDRAALKQKIGKEQIIIFVVKVAGDLVAKAKIQM---  
SVGTVAIQGETIFVRRHRQTVIADQEATV-VLRGVAEGPADAQALLRIRVDHTVVKLSVLLIPD-  
PVLTESVTIREGVGKALQIIQLDVYLLRDMGTGDETLAKSKS-----  
-----  
IAILKNITEPRMANLPAGVCRTFINAGPRAAVGMIFLLLDAGKIYTIDGDLRENTKSIKSMIGLVDAAKP  
KTLISAGYATARKIRYADVMVLTSDADLYAYAEERRELLRMVPVYITNAAKRRQLIIFALS LKGGHRRAR  
AALGVMAIAAILESQAEQGPVNHKDPEVLLDDGEIVGSEIMISRQAALDIKQIIKTDIIVIFPEFQEKMVV  
SLKFFCTDVAIFVIALICTVGEMLSREPSHAQEEGAGFQKRIRGHSVLFALAVTFDRRNLRD--A-  
QLFLDLGLAPPRYGIFYTEQPKRKQMPTEEDKKQIDGFDLVAAIKEDATKNHELDMPPEAMALAVE-  
DGTINVNAGVLAMTGDMAAVEKVDSKRKMALAVEKWTIASVALIDINMSGAPFRACG-  
IEQADVSATLPKKQI--  
LFLPGANNAEMEEELDGAGSSTAEEAEDKQLGILLVEPVLVVIQDSNTASLIANGGLEEWGTMAYKK  
HYAFAARMRLHMRTID-----EMDPNKQKAEEKITVKLDGDTRFRQLATEGVKEQMP-  
LHALNPDAFVLPVLPVTPAVGRVAADAGVLGARVPCDASL-  
RELQKSMKGNALPISGIRLLGMRAARAMVDEDIMVAGKVAA-  
LLVIVALETITHLVLRNDSEATLPWRLSVAERLEADTKRAGGFAARPFNSKPSLCKTQAHAKIADPIQE  
AAGYVAIEERFVFPVEGIPIQLILASPHSRVGEAKRAGLGHLDMAKEAQAKAVIMVLNEPDTNTEGLL  
NYLTTQQPTDLLFEDCLDVVIDMRRMSVV-----  
VQLNTV-  
HVLVPGVRDLADREIMAAAAHSGLVQVERIDERTGRERTLMWVYGAMEELWLLSVTYTDWVTDCA  
IGAILLHVYAQQINRAFSLERLQLAGWPPEATRWWNTWQLWLNKDGFFSYEAAFRAVKAVLKADLD  
DFDMSDVEGVGRYQSRQQLRVGYRIRQQVAFEQLDPRTDILLQSMTRL SVIRHALDMVAILIVREV  
VEFT-  
VVAKEDVAMGHVECVLADSFDTAKDADIGPVGIRTPDPVLGDGTVMKEAVLGKIDLANTVADFRYK  
MLVDGGRDLGVSWWTLQNLIPRIWVPPAQAAALKNLVPIAFFLGHTELNLAIFPTLWAGISKARANKL



MAGALIEKILEKVAAFADPEATTHQSKKLRFKYYGEEVDPVYLAYILDMFSLVATQVTVSDRLLKD  
RYVLNLKIFRGFTSLLWLSAQIGDKGPAATIITVQTIAGLGALVLFILLMRVVVLVETLYFKYVY--  
MLGYQAAKDVADADPEHFLSLAHASRDVEWIEVPAFFYYFKTATSRLSKNTALAKEFFGLFKERLRIID  
VLAVPPDRVEALVAFVALAGTLATSACVYPGVACGFCENAAVLEADQDWNLHRSMGITLAFYDA  
RESVKGWFDKGLHKDVAATGLREAGALTTPFYAGATAKQCVPVHRVLDLGEVEAALIEIDSAVVVA  
DEEQSLADKPTTRENVSAGVGGVVLVAGTMNMGANLDSVERGGNIIIEEEEQYSAVNGKKTGKVT  
DKVIMVLSQAYFPVLKRLASANALDKGAFGLLIDAPDDADNKNKHGRELTIPAPTVAESAPLYAESEIE  
RIAWIAPLHLLGLTDAVLGFEPDQYSFISMMINASLEIMETAEV--  
DYHVLETGSRPPGFRVILIKGLHIRLLAGVCTIIVVGSAGRAEVTAYIQG-  
AVPITLNKSTFLPAFAASSCHVIDIFSTMLRPPERSAIEMLILETVael-  
LEVTRIENDKLERMAALLPGLDIAALLSLVAAAKDFAAIVTIDQAITAILSVAEEAVVLRREMLLTAEIAVT  
ALALALALLMLTHDQGLHQKEHAREAQMKGLIQGGVVLQVKAADRMMLASTADKVRDLTDEGTT  
SAFASLNLATVSDGFYVLSSAVLQMTSDLMIVAVARVLADKETKNALVVRHPEQVKTQSTYAEQSP  
GMVLQTLTGAIPPLAIKPDTELLWTLVAALWKVKAHLANAARPHIERVLILALALITVLLQSEGGGM  
GGG--  
GPAAKALAAFSILTIKAKAGDEVKVARVMNLNSRLGRPEEAVNPEFRGAELEQSKYEAENVEVDTM  
ETIRRFVDIPFLVSTRTQHNESEDGRARMVLDVTRVRFDL-  
VTKRSEILAARAETDGIIAREMGKDLAALHPEAAALGKIAALQHFIQVQDAHISNYVTAAIHAVLGMML  
LVLFIQEVRVSKVWVPTREVTMVFIMAALAVFFLVIGLGVQLVFMLSGISWNQLTTIVLGEGIMVVRQ  
TNTPEDS-  
IGILQNTYADLICSGRVAKADIEASLHIVVAGRVARGTWYVIYLYEISQAQDQSGIMQRAFRQMTLSQ  
SLIDGRMECKIKVVTSDRYA-  
TYEIKGGQHRKGTRYNRVKVGHNIPVQVLPRMKMAFGPPNLVLVKTFGAVVQKRFAQALTHIRHGA  
VTIGPMEVSSPYIGNKKARHAPGDSVVDLKPNDIVRSVAVPELIWARENEDNGAVHDKYVKTTHKL  
QAKRKAANDKAQYDHRNQVELSFIGLAVKVLPEKAIHATSGELMPTASVAVTEGMKGIAATIRLDP  
MEKALIAIYIKMRPQLNLGGQTDKKIVKCLNNNLDDVEYGKLGRRKIPITI-----  
-----  
SAFMMLFGYIARAVYALYLRVIRRTILLVKTIVVNASTVLSAIIIGVSIRLRHKSTNVCETNHHIKTIEKR  
ARMTLAGTGKVKLNLSPGKIGKKGGRIKGYMPYKNFNIFDGLASGRRAKVKELAKLKNVDKSITVDGIR  
TKQQGGRTPKAQLSNAI-  
NTRVGVDIVGENEQUEESNPRANAEMGQIFAIDARVFSHVGALIGHALEAVLAVVAIWEIGRAHNLL  
AIRLKINAGIEMHSAA-VEVAVAAAAFAQNAGEASVIADISESYLGTLAISATSVDSRLRRRSLNE----  
-----  
RHGIRAKGTYGKERAMMQITPTKPVKIWVPVFVSEPELLAPIRAFAESTGDGVTVVKLTTDVKVTMFEK  
AVASIAVTGKATSIVYTVLEKVTQLMKDIIYTQRAKAHYGRRLRSHVVTTKQRRHLSMIKRTVVADP  
SMDAARLTDGEVAVITGATMAFVMSEQEAV--  
GDVDLHFHEEPRREADVGIGGPETFLTTEQPRVLALLFLRAYLIHIVEIGTTNGFSDAATYDVLAMQN  
KLDRKLSADIAKVRMVLTDNVTDMGVTDLAPRREAAGDKILSAFWINGVTANADIILLVANMETHCV  
PENINCAIRLFYQRITLQAKERGGDVSAIVPAANQIEAAEGTVIYSIKGQTPGTGQMKNIEGIRSIVK  
SLAVQLFQVDTFLDDTWIATWLRALDVFVSAEDGKEAVDHVVERDTELEFAPQKDIVARKIRIFTP  
AAPSAVVIWDPAIEREDKAEAQGTILKIYGNLQDINCFTDIGAEPKIESLKAWDEKEYVVRDDIPED  
I-  
TLVGKSSKVNKEFAIPDVAVCAPSKPGVTESIDRGEPKAGTCGEVANMSYPQESLVNAVSSANVQKNI  
SMVLSGHPVGEMGISREIERHLETSMCEIFVDKADVDVALDFYILDLTPLRVGLDPPNARVQIDGKESR

KLMAVQDGDADLQRHPKVSQATGTGLKAGIKARMPDDALIVDGVMHGDISFTATDLPDGRV-  
VTPVFNEVKAQLKIDKVLLKAFHVVTLSFSNDKGEEHLVKLRLNALKKSTRHYEMLLKIRETECAESPHAI  
SVGKVLKIDALMQTICQAHYKEIPELLADELTALGVMGEQGLLHIVPRLMILSVLHLLRLEIALQIDPWG  
LQAAAMVTDQTMGLYCRDRHWSF-AISEVVGNTFFARTKEADTEQKIRARNPV-VLL-LGKFNMI-  
ISPSGLGLTSTAASPOGRGNTEELILSTERLQDEMGYYVLQILLVFVDEVILAYGSGDEPIKFLVAEQAVT  
GRQNPGMVTLTR-  
TFPLELQRNATFVMVFEDCTMKNLSHKKMHMNLVVIKSKGWIVNVSTKILISDQAIASYAEDAGAHT  
QPSESALAVITSRVMAPIVLVVSQKPTAPSKTLFLEALSLYDEVTSTVQNKPKYYIFEGDVVAVLETLDA  
AVLLGMQRPQPDRMRRAIVAAVRLAIAIRASGIVTRLEENLINFARAVNFAALYYQLGALI-----  
--EFRVRNHADVSTKRSRPYKAHPKFLHKADVDKSLIATGVDTLA  
>GCA\_000169455  
AVIKPVEMSKYAPVLMIRQQQVATVSGAGSPALRAKTVFRKSGLQRKTSSKWVAKPLYF-  
GVVKMGNIQVLVSISVDNRAVCTVAQVVEQEVVHGLVALEAVKRKIALEEMDGMTTEDPAKVAEF  
EAELDLKRFRDADARADMLPVLLGLTLEVRFDPEHPVHDLALPVIFEVI-  
GIMADKGGIEVDDCAISNAVSDVDPIAYVSPIDLEAVAGTEMAFIDQEA AVAAARETIGLEELALEAGIL  
VVGIKPLLLPV-FG-SGDV-MSFAARSRTLSSIVALAVAYPELTRA-IE-AIASEM-  
MTAAQAAAAAEKRGTAEEIRIVKRMQRSSGLSDDPPELVMELEDAEAGNSSWAGQIYDDPISGSSES  
VGNIVHAANKRQNFARSITYLRKVEISDKAAAPLMRGVKHNSKSRAARKLGDEIAELNFANVPPGIAIR  
AAAQKPADRLLHDATEAEEILMVVVRWHVTWKTAVAVLLLFLAGDIVGLIELGGIAAVGRPDGILNRH  
HKLNGSLIEQRPIIEKMTLRLRAALKEKLGAEQIIIFVVKVQGDVLVADATIQMG-  
GPVGAVVAIQGDVIFVRRHKQTVITDQEATV-VLKGVAEGPADAQALLRIRVTHTLVEISVLLIPE-  
PVLVENVSIREGVGKALQIIQLDVYLLRDMGTGEETLA----  
RELIREVLMLDPITGVRLAYGKLKERIGKKLGMDLL-----  
RSILAAVTEPRMENLPDGVCRSFITAGPRAAVGMLFLLLDEAGKLYQIDGDMRELTKSVKSLIGLVDAK  
APKVL SAGYAEERLRIRFADCEVLNGEADLYPYKIERREIMRMVPVYIINAAKRRQLVLFALSLKGGHRR  
AMMALNVMLAAAIIESQAEKGKVHHEAPEILLDDAEVVGTAIMISRQASLDLKQILKIDVIVIFPEFQEK  
MVVSLKFFCTEVAIFVIALITTVGEMLSREPEHAQEEGAGYQKRIRGHSVLFALEVTFDRSNCKRNALPD  
VFLGLGLADPRYGILYTNQPKKKQMPSEPDGDRVDGFELVHAVKEDGSSNHELEMPEAMALAVE-  
DASINVSAGVLAMNGGMVDVEKVDSKRKVALAATKWNISKLQFVDVNISGAAAVRACD-  
IEQANLSAALEHKVWFLFLPGASNAELEEELDGAGASTADAAADKQIAILLVNPVLVVIQDSNSAG  
LIANEGLDEWGT MAYKKHYSFAARMRLHMRTIDAIEVGVDLNPKNQKSEKVKTVKLEGDTRFRQLAV  
EGVKEQMP-LHALNPFAV-LPILVTPAVGSVAADENVLGAKVPVDASL-  
RELQKSQKGSALPITAIRLLAMRAARAMIEEDIMVAGKVAA-  
LFKIRALETITALVLRNDSEATLPWRLSVAERLEADTKRASGFAARPFKTKPSLCNTQAHAKIADPIQEIA  
AGYVAAESRFVFPVEVVAIKLILSSPHSRVEEKKRGEGHLHGMAKELLAKAVVMLRNEPDTNTEGLL  
NYLTTNQPTDLLFEDCLDVIIDIRMSVV-----  
VHLNTV-  
HVVEGVADVGDYEIMAAKFASGLVQVEQVDDRTGREKTAMWMYGAMEELWLNSVRWADWVP  
NCAIGAILHVYAQTINRAFSRLRLQLDGWPKEARWWNTWQLWLNKDGFFGYDAAFRVAKQILKS  
NQADFEMKDV EGVGRMQSKQEV RAGYRIREQVEYARLNPRADILLQAQTRLSIRHALEVVAIILRD  
VAPEFTLVAYQDVARGHVECVLAESFDTEKNAHIGPVGLRTPASIFGDGTVLKEAVLGKIDLANTVA  
EFRYLFLLDGGRALGV EWSL-NMLYARIWLPAPAALKNLLPICFFLQHPEIDLEWT-SLFD-  
ISKARADQLMAGALVEEILEGVAKFAEPEATTHQSKKEKHFKYYGEEVDPVHLAYILDLFALVATQVVL  
SDRLLKDRYVLNLKVFRGFTALLWMSLQLAMKGPSATVITVGSIALGLALVLFILL-

RDSVLVETLYRYVYVVMRGYSAAKDVQDADPEHLGQLSAASRDLEWIEVIPAFFYFKTATSMAREN  
TAVVREFFGLFKERLRIVEVLAVPPERVAALVEFVALAGTLDTSATA-  
VGVIAVGLCEPNAAAVLEAERDWNLHRSMGITLAFFEARDSVKGYFDKGLHKDVAEIGLREAGAFIT  
HFQCDVDAKQVVPPIHRVLDLGEMEAALIEIDSAVVVADEEQTLADKPTRDKSVGAVGGVVLGAT  
MNMGANLDSVERGGNIIIEEEEQYHAVNGKKADGKLTDKVLMVLSAAYFPVIAAFASANALDRGVF  
GLLIEAPTDADNLDHGREMVIPAPSVHTETTPLYAESDIDRIAWIAPLHLLGTLQAVLLFEPDFQGFISM  
MIDASLEIMETAEVLDDYHVLEKGARPPKFRVILIKGMHIRLLAAVGTLLVVGSAGRSEITAYIQGQAVPI  
TLRKNTFLPAFSPSSCKAVDIFSTLLRPPERSVEMLILETVAEL-  
LEVTRGENEKLERLLVLLPGLDLASLLTLLAAAEFSDIVTIGAAITAILSVAEEAVVLREMLLTKAEIAITAL  
ALALALLMLTGDEGLTQKEQPREAQMKELIQAGAVLQVHAEDAMVLAADKVRLDTDEGTTSAF  
ASLNLATVSDGFYVLSSAVLQLSSDLMMIVAVARVLADKESKNALVVRHPEQVKTQPTYAEGSPGMV  
LQTLTECIPPLAVKPEEVELLWTLVAALWRVKAHLASAARPHIERVLILLALGLIVVLLQSEGGGMGGG  
-  
MGSAAKALAAFSVLTLKASVGDEVKVRTRVMDLSSRLGRPEEAVNPEFKGEELDQTKYEAENVEVD  
CMETVRRFVDIPFLVSIRTQHNESEDGRARLVLDVTRVRFIDTVVTKRSDVILVERVETDGIAREMAKD  
MQSLHETAAALGKVAALQHFIALSDAHISNYVTAQTHSVLGMLLLVLFIQQVRVSKVWVPTREVTM  
VFIMAALAVFFLVIGLGLNLVFMVGGISPLQITTLVLGEGVMAVRQTSTFPAES-  
VTILQNTYADLICAGRVTKADIEASLHIVVGARVARGTWYVIYHYEITQAQSTAGIMQRAFRQATLSQS  
LIDGRMEVKIKVVTSDRYA-  
TYEIKGGQHRKGTRYNRVKVGHNIPVDLIARIKMAFGPPNLVLVKTFGAVVQKRFAQPLTHIRHGAVTI  
GPMEVSSPYITSKKARHAPGDAVVDIKPDNIVRSVAVPELIWARENEDQSAVHEKYVKTTHKIAAKR  
NRAVDKAQYDKRNQVHLSFIGLAVKVLPEQAIVHSTAGTLLPTESVSVTENLKGVAATIRLDPMEKALI  
AYIKMRPQLNLQGKTDNKIVKCLNNNLDDVEWGMGRRKIPITIKSVYDVEHERATELVKLMPYK  
DDVEGRKSQFAEK--  
ALFEPLKAFMMMFGFIARSVYALSLRVVRRRTILLVTKIVVNANNVLSAIIIGVSIRLRHKSTNVADTKH  
HIKTIEKRARMTLAGTGSVKLNLRPGRVGGKGGRIKGYMPYKNYNIFDGLASGRRAKVAELAKLKKVD  
KAIAVDGIRTRQQGGRLPKADLSNALSNTVRDVEVVGENTQEASNPRANAEMGQIFAAIDARVYSLV  
AALVGHALEAVLAICAILGIGKAHVMLAV-LKMNAGIELHSAA-VAQAVAAA-YAQAGGEA-  
AIADVSEGD LGALAVSEQSLDVCRLRRRQLG-  
LKKTKKEAYMSLTCFSGKGDVKIIEATQTQAYEIVSTRTAERHGIAKAGTYGKERAMMQITPTKPVKV  
WVPVFNDDDELLAPV-----  
NGDGVAVVKLANDVKITMFEKGVASLAISGKATTVVYTVLEKVTLSKDIIYEQRAKAHYGRGRLRSHV  
VTHTKQKRHLSSMMKRTVVADPSMDAARLTDGEVSVVTGATMAFVMSEQDAV--  
GDVDYHFHEEPRREAPLGIAGPETFLSTEQPRLLALLFLRAYLIHIVDIETVGGFADAATIYEVLAMQN  
KLDRLSAEIAKVRMCLHDDVEDMGVTAEAPRRDAAGDAILSAYWINGVTANSIILLVANMECKTA  
PENIDCAVRLFYQRVTLQAKERDGDVSVELVPAQNNQIEAAEGTVIYTIKGNPSSPQMKNIEAISRSI  
VKSLAVQLFQIDLFLNDTWIATLLRAAQEVVVDAREGKEGVDHVVERDTELEMAPQKDIVARKIRIYT  
PAAPSAVVIWDPAIEREDKADAQGTLMIYGPDLQDINCFTDIGAEPKIESLAAWDEKEYVVRHDDIP  
EDITTLVGKSSKVNKEFGIPDVAVCAPAKPGVTESIDRGEPKAGSCGEVANLPYPQESLVNNVSSANV  
QKNISMVLGGHPVGEMGISREVERHLETNMCEIFVDKDDVDVALDFYKIKLTPLRVGMMDKPNKAVEI  
DGKESRKLMAVKDGEAQLQRHPKVSEESGTRIGGGEKAKLPSDALVYDGVQHGDLKFTATDLPEGRV  
-  
VTPVNMVAVKAQLEIDKVMLKTFHVVTLSFSNDKAEHLIKLRLNALKKSTRHYEMLLKIRDTECAQSPH  
AIPVGKILKIESLLQTICTAHYTAIEPLMAEDLTALGVMGDQGLLHVVPRLMILAVLHLCPIEAKWVLRI

WGLQQHAILTDQTMGLPVRARSWSF-AVSEVVGNTEFFARTKDDDEQRLHARNPI-MIL-  
YGKEGML-  
ISPSGLKLSSTQTPEADHGNDQLILSTERLQDSMSYHILAILLVFVDEVILAYGSGEEPLKFLVANQAIT  
GRDNPQLVCLSRRTFPLDLQRDAVFVLVLEDTTMKNLSHKKMHMNLVLVKPKSWVENVSTKILISDQ  
AIASYAEDAGAHTQPSESALAITSRVIAPIVLVVSQKPTAPSKTLFLEALNLYDEITATVQKRPKRYFIFEG  
DVVAILGTLDAAVILGMQRPQPDRFRRAVVAQAIRLAIALRASGVLCELECAQINFRAVSLAQ-  
VYPGLEA--ALAIT-SALDFRVRNHKTSTKRDRPYKGHTKFLHKAEEKALVAEGVDTIA  
>GCA\_000170775  
AVIKPVVMNEYAPVLMIKQTQVATVSGAGSPSLRAKTVYRKSGLQRKTLTKRVAMNIYY-  
GVMKLGDIVQLVSISVDARAVCTVAQVVEQEVVHGLVALAAVKKKIALEAINGMTTEDPAKVCEFD  
EELDRLKFRDAEDRADMLPVLLGLTLTIRFDPHEPLVHDIPIPIYEVV-  
GIMADKGGIEVDDCAISTAVSDVDPLAYVSPIDLAAVAGEQMAFIDQEHAISAAREAL--  
LALESTVLVVGIRPLIPV-LADDGDN-MSFANRSRELGSIVDLAVSAERLSRAR-EQGIASDM-  
MVRMQAEALSERRGTAEIRIVKRMNRSAGLADDPELVLLGDAAEGNSSWAGQIYDDPISGSSQSDS  
AGNIVVAANKRQNFARSITFLRKVEISDKATAPLMRGVKHNSKSRSSRKIDDAIAVLNFPNVPEGIAIRA  
EGEKPADTLLHDATETEEILLVVRWKVTWKTAIHALLV-  
AGNIVGIELGGIAAVGRPEGLLRHHKLNGSLIEQRPIIEKTLRLRASLKQKLKGDQVIFVVKVSGDLV  
ADAKVQMG-GPIGAVVAVQGDVIFVRRHRQTLVTDSEATV-  
ILKGVAEGPADAEALLRIRVSHTLVALSVLLIPQ-  
PVLVDSVSIREGVGKALQIIQLDVYLLRDMGTGSETLAESSRELIREVLMIDPVTGVRLAYGEIKERMGK  
KVGLKDLETLF--  
ISILEGITEPRMENLPAGVCRNFIQAGPRAAVGMIFLLLDEAGRVTIDGDLRELPKSVKSLIGLVDSTAA  
KVL SATYATERLRIRYADCGVLVAEANLYAYKDERKELLRMVPVYIINEAKRRQLVIVALSLRGGHRRV  
MASIGVMIAAAILES HAEMGVVDHAEPGILLDDAEVVG TAMMISRQAALDLKQIVRTDWWWFPDFQ  
EKMVVS LRRFFCTEVAIFVIALITTVGDMLSREPNSAKETGAGFQKRIRKHAVLFALQVSFERRNCRDA-  
RPDLFLGLGLADPRYGIFYINQPKKKQMPSEPDS DRVDGFELVHAVKADTSSN-  
ELEMPEAMALAVEADAAINLAAGVLAFKG-  
MTAIERVDSKRKMALATEKWNISRLDMADIHLSGAAQVRATG-IEQADLSATLEAKNM-  
FLYLPGASNSALEEDKLNAGAGASSADAAERQTRILLVTPVLVVIQDSSAAGLITNGGLEEWGTMAYK  
KH YAFARMRLHMRVDCIEVGIEMEPSKQKA EHIKTVKLQGDTRFRQLAIEGVKEQMP-  
LHALNP DFAVLVPVLVTPAVGRVAAD EAVLGARVPCEFSL-  
RELQKSMRGAALPITAIRLLPMRAARAMIEEDIMVAGKVAA-  
LLKIRAHETVVGII LRNDSEATVPWRLSVAERLEADAKRMAGYAARPFISKPSLCDVQAHANVAEAIETI  
AAGYVAKDARFVYPVEGIKIRLILSSPHSRVGD AKRAGEGHLHEMAKELIAKAVMMLKSEPDTNTEGLL  
NYVTTNQPTDLLFPDCLDVVIDMRRMSIV-----  
VQLNVV-  
HVVDGVKDVGDYEIMAAAAPSGLVQVERVDDRTGRERTIMW MYGAMEDLWLMSVRYADWVA  
DCAIGAILHVYAQTINRAFS LTRLQLEGWPQDASRWWNTWQLWLNKDGFFGYEAAFRVRQALKE  
ALFGYDMSDIEGVGRYQSRQQLRVGYRIREQVDFARLDPRTDILLQAKTRLAVIRHALALVAILILREV  
GEFTLVVAHEDVAMGHVECVLAESFEFTEKNAHIGPVGLRTPETVLGDGTVLQEAVLGKIDLANTVLD  
YRYLFVVDGGRELGVWWLSI-  
NMLYARIWLPPAQAALKNLLPICFFLSHPELDLLLGDLLFDGISKARAQQLMAGALIEEILEAVARFADP  
EATTHQSNKERHFKYYGEEVDPVHLAYILDMFALVATQVVVSDRLLKDRYVLNMRV-  
RGFTSLLWLSLQLAEKGPAATVITLGTIAGLGALVLFILL-RESVLVETLYRYVY--

MLGYSAAKDVADADPEHLLVLAAASRDVEYIEIIPAFFYYFDTAT-  
FEPLNTAVAKEFFGLFEERLRVIDVLAVPPDRVEALVTFVALAGTLPTSAAALPGVIACGLCEPNAAGVL  
EADQDWNHLHRSMGITLAFFDARESVMKNWFDKGLHKDVAETGLREAGGFTTTNLCGKEAKKCVPAIH  
RVVDLGELEAGLIEIDSAVLVADEEQTLADRPPTTREKKVGAVGGVVLATGMNMGGALDQVERGGNIII  
ELEQEYHAVNGKKGDGKLTDKVLMVLSCAYFPVIRKMASASALDKGAFDLLISAPEDAENLDHGGE  
LTIPVPTVHAE-  
AVLYAESEIDRIAWIAPMHLLGTLPAVLLFEPDQYSFISMMIDASLEITQTAEVLLDDYHVLEKGARPPGF  
RTILIRGLHIRLLAAIGTIIVVGSAGRSEITAYIQGRAVPISLSKASFLPAFAASSCTVVDIFSTMLRPPERST  
VQTLILETVAE-  
LDVTRLVNDKLERLRLLLPGLDAALLLGLVAEAEDFSDIVTISRITAILSVAAERVVLRLLLLLAEIAISSL  
ALALALLMLTPDRGLTQKERAREAQKKELIQGGAVLQIHAADAMVLASTADKVRNLNTEGTTSAFA  
SLNLATVSDGFYVMSSAVLQLSSDLMMIVSVARVLADKETKNALVVRHPEQVKTQPTYAEGSPGMV  
LQTLTDCIPPLAIKPEDVELLWTLVAALWRMKAHLAEARRPRLERVLVLLLALIVVLLQSEGGGMGG  
G-  
MGAAAKILAAFSILTİKASVGDEVKVARVMIDLSSRLGRPEESVNPEFRGEELEQTKFEAENVEVDCM  
ETIRRFVDIPFLVSIRTQHNESEDRGARLVLDVTRVRFDL-  
VTKRSEIILAAARETDGIIARQMAKDMQSLHSEIAALGKIAALDHFISLNDGHISNYVTAEISSVLGMLLL  
VLFIQQVRVAKVWPNRREVTMVFIMATIAIFFLVIGLG-  
KLVFMLGGISPLQITTLILGEGVMAVRQASTFPADS-  
VTILQNTYADLICAGRVTKADIEASLHIVVGARVARGTWYVIYPYEITQAQGEAGIMQRAFRQATLSKS  
LIDGRIEVKVKVVTSDRYA-  
TYEIKGGQHRKGTRYNRVKMGHNIPVDLLARIKMAFGDPNLILVKTFGAVVQKRFAAPLTHMRHGAV  
TIGPMEVASPYIRMKKARHAPGDSVVEIKPDNIVRSVAVVPELIWARENEDQSAVHDKYVKVTHKIAA  
KRNAAVDKAQYDKRNQVHLSFIGLAVKVLPAQAIVDATAGTLLPTASVAVTENLKGVAATIRLDPME  
KALIAYIKMRPQLNLAGKTDNKIVKCLNNNLDDVEYGKLGRRAKPLTIKSVYDVESRRATELVKLMP  
YKDDVEGRKSQFAEK--  
ALFEPLKAFMMLFGFIARAIYALYLRVVRTILLVKTIVVNAKTVLSAIIIGVSIRLRHKSTNVADTNHHI  
KTIEKRARMTLAGGPSVKLHLHPGKVGMAKAGRIKGYMPYKNFNIFEGLSSGRRNKVRELAKLKTVDKTI  
TVEGIRTRQQGGRIPKADLSNAI-  
NTRVGVDIVGENEQEASNPRANAEMGQIFAAIDARVYSLVAALIGHALEAVLALAAIQGIGKAHALLA  
VRLHVNAGIEFHSA-AVDEAVAAA-YAQPAGEA-AIADVSEGLGLTRINAASLDVCRMRRRQLG-  
LKKTCKDAYMELTCFAGKGDKVKIVEASQSQFYEIVATRTAERFGIKAKGTFGKERAMMQIVPSKPVKV  
WVPVVFVSEEELLAPIRAFAETNGDGVTVVVLTKDIKVTMFEKAVASLAVTGKSTTVVYTVLEKVTLMK  
DIIYEQRAKAHYGRGRLRSHVVHTKQDRHLSMMRRTVVADPRMNAARLTDGEVSVITGATMAFV  
MSEQDAV--  
GDVDMHFHEEPRREAALGIAGPETFLATEQPRVLALIYLRAYLIHIIIEIGTRGEFNDAATIYDILRAMHSK  
LDRKLSAEIAKVRMCLHDDVADMVGRQEPAPRETAGDPILSAYWINGVTAQSDIILLVANLECKTAPE  
NINCAVRLFYQRVTLQAKERGGDVTVALVKAQNQIEAAEGVVIYEIKGKTPGTIQWKLNIDAISRSIVKS  
LAVQLFQVDLFLSDTWIATLLRAAQDVVYVDAKDGEAVDHHVVERDKAVEMAPQKDIVRRKIRVYTP  
AAPSAVVIWDAAIERADKADAQGTIIKIYGPLQDISCFTDIGSEPKIESIKSWDEKERYVVRDDIPDI  
-  
TLVGKSSKVNKEFGIPDVAVCAPSKPGVVESIDRGEKAGSCGEVANLPYPQESLVNRVSSANVQKNI  
SMVLGGHPVGEMGISRKVERHLETNMCEIFVDKPDVDVALDFYTLTLPLRVGLDQPNKVEIDGKES  
RKLMVLDGEAALQRHPKVSEASGTGT-AGSKARLPDDALIYDGLHGDISFTATDLPDGRV-

VTPVANTVKAQLKIDKVLLRTFHVVTLSFSSHKGEENLIKRLNALKKSTRHYEMLLKIRDTECAQSPHAI  
PVGKILKIDALLQTICQAHYVAIEPLLADDLTALGVMGDQGLLHIVPRLMILAVLHLWGPTAVDIIIPRW  
DLPHRALITDVTMGLRLRARDWTYMAISEVVGNTFFARTADDDTEQRLHARNPI-VLL-YGKFGMV-  
ISPSGLRLDSTASPDDHGNADALILSRERLQDAMGYFVLRILLVFVDESILAWGSGDEPLKFLVADQA  
VTGRDNPGLVCLTRRTFPLDLQRDATFVLVFEDSTMKNLSHKMHMNLVLIKSGWIVNVSTKILISD  
QAIASYAEDAGAHSQPSESALAVITSRVMAPIVLVLSQKPTAPSKTMFLEALNLLDDVTATVLNRPKRY  
YIFEGDLISVLHTVGASVILGMQRPQPDRMRRAVVATAIRLAIAAL-----LEAGVINFARAISLAR-  
GYPVPELL-----DFRVRNHKTSTKRDKPYKAHPKVLHKADSNKGLVAEGVDTIA  
>GCA\_000170875  
AVIKPVSMKAYAPVLMIRQTQVATVSGAGSPSLRAKTVFRKSGLGRKTSCKWVAKPLYF-  
GAMKMGKIVQLVSISVDARAVCTVAQVVEQEVVHGLVALAAVKRKIALEEIGGMTTEDPAKVAEFE  
TEIELQKFRDADDRADMLPVMLGLTSLIRFDPEPLVHDIPIPVIFEV-  
GIMAERGGIEVDDCAISNAVSDVDPVPYVSPIDLDAVAGDKVAYIDQEAAVSAAKEAIALEELALEASV  
LVVGISPLLLPV-LGEQGD-MSFANRSRDLRSIVDLAVSAAPVQRA-I-AGIAEM-  
MARLQAKALAEKRGTAEEIRIVKRMQRSAGLADDPDLVIMEDAAEGHSSWAGQVYDDPISGSSED  
SAGNIVVAANKRQSLTRSITFLRKVEISDKAAAPLMRGVKHNSKRSARKIDDAIAALNFPNVPPGIAIR  
AAAGKPPDTLLHDATETEAILLLVVRWKVTWKTAVIVTLVAVAGDIVGLIELGGIAAVGKPDGLLNRHH  
KLNGLSIEQRRIVEKLTLLRLRAALKQKLKGEQVIIFVVKVQGDVADAKVQMG-  
GPIGAVVAVQGDVIFVRRHRQTLVTDQEATVQILKGVAEGPADAQALLRIRVGHTLVELSVLLIPE-  
PVLVDSVSIREGVGKALQIIQLDVYLLRDMGTGSETLAESTSRELVRDLLMVDPVTGVRLAYGDIRERL  
GKKLDLKDLET----

LSIIAGVTEPRMQNLPEGVCRDFIQAGPRAAVGMIFLLLDEAGRIYSIDGDLRELPKSVKSLIGLVDAKA  
PKVLSATYATARLVRVFADCEVLQAEANLYAYKEERRELLRMVPVYIITEAKRRQLVILALSLRGGHRA  
RASIGVLIAAAIIESQAINGAIHHAEPRIILLDDAEIVGSAMMISRQSALELKQVSKIDVVVVFPDFQEKM  
VWSLKFFCTEVAIFVIALIVTVGEMLSREPSSAQEDGAGFQKRIRGHSVLFALAAVFERRNCDDAKI-  
TLFLALGLAPPRHGIIYTQPKKKQMPSEPDADRVDGFDLVHAIKEDDKD-QELHMPEAMALAVE-  
DATINLSGGVLALKGGMTAVERVDSKRKMALAAEKWTIARLPLVDIHLSGASLTRCTG-  
IELANLSAALGRKKV--

LYLPGASNKEEEEQLDGAGNSSAIVAEDRQRQILLVHPVLVVIQDSNAAGLISNGGIDEWGTMAYKK  
HYSFAARMRLHMRTID-----EMEPNKQKAQKVKTVRLEGDTRFRQLAVDGVKEQMP-  
LHALNPDAFVLVPLLVSAPVGCVAARAGVLGAEVPCAFSL-  
RELQKSMKGHALPITAIRLLPMRAARAMIDEDIMVAGKIAA-  
LLKIRATETIAQLVLRNDSEATLPWRLSVAERLEADTKRASGYAARPFMSKPSLCDTQAHARVADPIQE  
IAAGYVAKEGRFVFPVEGIAIRLILADPHSRVGSSKRAGEGHLHEMAKELLAKAVLMLKNEPETNTEGLL  
TYLTNNQPTDLLFEDCLDIVIEMRRMSV-----  
IQLTTV-HVVVDGVRDVGDYEIMAAAA-

SGLVQTERVDERTGRERTLMWMYGAMEDLWMLSLRYADWIQDCTIGAILHVYAQTINRAFSKRLQ  
LSGWPPDASRWNTWQLWLNKDGGFFGYEAAFRAACQVLKSALLDFEMQDIEGVGRYQSKQQLRV  
GYRIRQQVAFARLDPRTDILLQAKTRLSVIRHELDVVAILIREIVGEFT-  
VVAQEDVAMGHVECVLADCFDFTEKNAHIGPVGLRGPETILGDGTVLQEAVLGKIELANTVAEYRYLF  
VIDGGRALGVKWLSL-NMLYPRIWLPPAQAALKNLLPICFFLSHPEVDLGW--  
LFAGISKARAEQLMAGALIEEILEGVARFAEPEATTHQSKKERHFKYYGEEVDPVHLAYILDLFALVATQ  
VTVSDRLLKDRYVLNMRVFRTLTSLWLSAQLAEKGPAATIITVGTIAGLGALILFIILL-  
RASVLVETLYRYVY--MLGYTAAKDVADADPEHLLPLSSASRDVEWIEIIPAFFYFKTAT-

FEPFNTAKAREFFGLFEERLRLIDVLAVPPDRVEELVDFVALAGTLQTSAEALPGVIACGLCEPNAASVL  
EADQDWNLHRSMGITLAFFEARESVMKNWFDKGLHKQVAETGLREAGGFTIHNLCCKVEAKKCVPAVH  
RVLDMGEVEAGLIEIDSAVLVADEEQTLADRPPTTREKKVGAVGGVVLVAGTMNMGGALDQVERGGNI  
IIEEEEQYHAVNGKKADGKLTNAVLMVLSLAYLPVLRQASASALDRGLHDLIIQAPADADNLDHG  
REMSIPLPTIHAETAPLYAESEIDRIAWIAPLHLLGTLPAVLLFEPDQYSFISMMIDASLEITETAEVLDY  
HVLERGARPPGFRVILIKGLHIRLLAAIGTIIVVGSAGRAEITAYIQGRAVPIGLAKVTFLPAFAASSCKV  
DIFSTMLRPPPERSTVQMLILETVAEL -  
LEVTRLQNDKLERLLVLLPGLDAATLLSLLATAEDFADIVTISAAILSVAAERVVRELLLTAEIAITAL  
ALALALLMLTADRGLTQKERAREGQKKELIQGGAVLQVHAADAMVLAATADKVRLDTDEGTTSF  
ASLNLATVSDGFYVMSSAVLQMSSDLMMIVAVSRVLADKETKNALVVRHPEQVKTQPTYAEGSPG  
MVLQTLTGSIPLAIKPEQVELLWTLVAALWRVKAHIAEAKRPRLERVLVLLALALIVLLQSEGGGM  
GGG -  
MGAAAKILAAFSLLTLKASVGEEVRKVTRRVMDLNSRLGRPEESVNPEFRGEELEQTKFEANVEVDC  
METIRRFVDIPFLVSTRTQHNESEDGRGMVLDVTRVRFDL -  
VTKRSEIILAAEAETDGIISREMAKDLQALQPELAALGKIAALEHFIALNDGHISNYVTADIHSVLGMLLL  
VLFIQQVRVAKVWPTRREVTMVFIMAALAVFFLVIGL -  
KLVFMLGGISPLQITTLVLGEGVMAVRQASTFPAES -  
VTILQNTYADLICAGRVTKADIERSLHIVVAARVARGTWYVIYHIEITQAQGEAGIIQRSFRQATLSQSL  
IDGRIEVKVKVTS DRYA -  
TYEIKGGQHRKGRFLRVKMGHNIPVNLLARLKMAFGDPNLILVKTFGAVVQKRFAQPLTHGRHGAV  
TIGPMEVASPYIQMKK -  
RHAPGDSVVGAKPDNIVRSVAVVPELIWARENEDNSAVHEKYVKTTHKVAAKRNRAVDKAQYDKR  
NQVHLSFIGLAVKVLPAQAIHVHATAGTLLPTESVAVTENLKGVAATIRLDPMEKALIAIKRMRPQLNL  
AGKNDKKIVKCLNNNLDDVEYGKLGRRAKPLTIKSVYDVEHRRATELVKLIPYKDDVEGRKSQFAEKE  
-  
ALFEPLKAFMMLFGFIARSVYALYLRVVRRTILLVTKIVVNAKSVLSAIIIGVSIRLRHKSTNVADTNHYI  
KTIEARARMTLAGTPSVKLHLRPGKVGKKAGRIKGFMPYKNYNIFEKLESGRRSKVKDLAKLKKVDKTL  
VDGIRTKQQGGRIPTADLSNAF -  
NTRVGVDIVGENEQEQSNPRANAEMGQLFAAIDARVYHHVAALIGHALVAVLALAILGIGRAHALL  
AVKLNKINASIEFHSA - VETAVAAA - HAQPAGEAA - ILDVSEADLGDLMSEASLDVCRVRRRQLG -  
LKKTCKDAYMSLTCSFGKDKIKIVEASQTQFYEIVATRTAERHGIHAKGTGKERAMMQITPTKPVKV  
WVPIFVSETELLAPIRAFAETNGDGVVVKLTDKIKVTMFEKAVASLAVAGKSTSIVYTVLEKVTLSKDII  
YEQRAKCHYGRGRLRSHVVTHTKQKRHLSMMRRTVVARPRMDAARLTDGEVSVITGATMAFVMSE  
QDAV - -  
GDARMHFHDEPRREAALGIAGQDTFLSTEHPRTLALLFLREFLIHLVDIGTVGAFADAATIIDILRAMEY  
KLDRKLSAEIAKVRMCLHDDVANMGVRQEAPRRETAGDPILSAYWINGVTANADIILLVANLECKTAP  
ENIDCAVRLFYQRVTLQAKERNGDVSVRLVPAKTQIEAAEGTVIYEIKGNTPGSTQWKLNVDAISRSIV  
KSFAVQLFQVDLFLNDTWIATLLRAAQDVVFVDAKEGKEAVDHVVERDNELEMAPQKDIVRRKIRVY  
TPAAPSAVVIWDPAIERADKAEAQGTILKIYGPLDQDISCFTDIGSEPKIESLKSWEDEKEYVHRDDIPP  
DI -  
TLVGKSSKVNKEFGIPDVAVCAPSKPGVTESIDRGEPKAGSCGEVANLPYPQESLVNRVSSANVQKNI  
SMVLGGHPVGEMGISRKVERHLETNMCEIFVDRPDIDVALDFYTLTPLRVGLDRPNKVEIAGKESR  
KLMAVRDGDACLQRHPKLSEAGSGSGAGTKARLPDEALIYDGVLHGDLTFTATDLPGRV -  
VTPVVNTVKAQLKIDKVMIKTFHVVTLSFSSNKGEEHLIKRLNALKKSTRHYEMMLKIRDTECAQSPH

AIPVGKILKIEALLQTICQAHYTAIEPLLADDLTALGVLGDQGLLHIVPRLMILAVLVVWGLEAAKDVPT  
WDL SQRAITDQTMGLSIRERAWSY-AISEVVGNTFFSRTKDDDEQRLHARNPI-VLL-YGKAGMV-  
ISPSGLRLDSTTETADDHGNADPLILSRERLQDAMEYYVLRILLVFVDEVILGYSGDDPLKFLVADQA  
VTGRDNPGVLCLTRRTFPLDLQRDIVFVMVFADCTMKNLSHKKMHMNLVLIKSGWIVNVSTKILISD  
QAIASYAEDAGAHTQPSESALAVITSRVIAPIVLVISQKPSAPSKTMFLEALNLYDEVTATVLRNPKRYI  
FEGDLISVLNLTDAAVILGMQRPQPDRMRRAVVAAAIRLAIAALASGIVAALEGGAINFSRAVSFVA-  
AY-----DFRVRNHKTSTKRDRPYKAHPKVLHKADTDKGLIAEGVDIA  
>GCA\_000172095  
AVIKPVIQNEYAPVQLIAQGQVATVSGAGSPSLRAKTVYAKSALSRTSTKWVAKPIYY-  
GVLKMSNIVQLVSISVDSRSVCTVAQLVEQEVVHGLVALAAVKRKIALEEIDGMTTEDPAKVAQFEE  
AVELRRFRDADDRADMLPVMGLGLTKIKFDPHEPVVHDLPIPVIFEVV-  
GVMADRGGIEVDECAISQAIGDVPDIEYVSPIDLAAGDEMAFIDQEA AVAAARETIGLEELALEASIL  
VVGIRPLILPV-FGEAADV-MSFANRSRTLKSIVNLAVAFPELSRARIASAFASEM-  
MRRVQAAAAAEKRGTAEEIRIVKRMGRSAGLSDDPELVILEDAAEGNSSWAGQIYDDPISGSSESDSA  
GNIVY-  
ANARQNFARSITYIRKVEISDKANAPLMRGVKHNSKRSARKLDDAIAVLNFANVPEGIAMAAAAAK  
PNATLLHDAMEGEEILMIIVRWKVTWKTAIIALVLTAGNIVGLIELGGIAAVGKPDGLLNRHHKLN  
LIEQKPIIEKMTLRLRASLKEKLGKDQVIIFFVKVQGDLVANATVQMG-  
GPLGAVVAVQGEVIFVRRHKQTIITDQEATVEVLRGVAHGPAQAQALLRIRVTHTLVKISVLLIPD-  
PVLVDASVIREGVGKTLQIIQLDVYLLRDMGTGEETLAESLSRETVRDVLAVDTITGVRLAYGELKERQA  
KKLTLKDLRTMM--  
LSILAAVTEPRMENLPAGVCRTFITAGTRAAVGMLFLLLDEAGKLYAIDGDLRELQSVKSLIGLVDAKA  
PKVLSAGYATTRLKIRFADCEVLEAEADLYAYKEERRQLLRMVPVYIVLEAKRRQLIVFLLSLKGGHRR  
QAAIGVMLAAALLESQAEEGEVNHATPAILLDDAEIVGTAIMISRQAALQVKDRTKMDVVVVFPEFQ  
EKMVVSRLRFFCTEVAIFVIALIVTVGEMLSREPEHAQEEGAGFGKRIRGHSMFLALAVCFERSNLGDAL-  
ADLFLSMGLAPPRYGVLYTSQPKKKQMPAEPDKDRVDGFELVHAVKEDGASNHELEMPEAMALAVE  
ADASINLSAGVLAMNGGMVAVEKVD SKRKMSLIATKWNISKDLLDVNISGANQVRCLG-  
IELADLSASLAKQVYFLYLP GASNEEELKLNAGASTAEAAADRQGQILVVVPVLVVIQDSNTAGL  
IANDGLDEWGT MAYKKHYAFAARMRLHMRTID-----  
EMEPNKQKSEKIKTVKLEGDTRFRQLATDGVKEQMPVLHALNP DFAVLVPLLVT PAVGSVAADAGVL  
GAEVPVDASL-RELQKSQKGSALPISAIRLLEM RVARAMIEEDIMVAGKVAA-  
LLKISALETVIKLVLRNDSEATLPWRLSVAERLEADTKRAGGYAARPFKSKPSLCNTQAHAKVADPIQE  
AAGYVAVEEKFVPVEGIAIQIVLSSPHSRVGA EK RAGEGHLHEMAKELVGKAVMMIKNEPDTNSEGL  
MNYITTHQPTDLLFEDCLDVIIDMRRMSVV-----  
VHLNTV-  
HVVEGVRDVG DYEIMAAKAPSGLIQVERVDDRTGRERTIMW MYGAMEELWLLSVRYADWVTNC  
AIGAILHVYAQQINRAFSLRRLQLD GWPPEASSWWNTWQLWLNKDGFFGYDAAFR-  
KQVLKATLADYEMK DVEGVGRLLSRQEV RAGYRIRQQVEFERLDPRADILLQAKTRLSVIRHALQVVAI  
LILREVASEFTLVVAMEDVAMGHVECVLAEAFDFTAKDADIGPAGLRTPDPIFGDGTVLKEAVLGKIDL  
SNTVADFRYRMILDGGRQLGVEWTL-NMLYTRIWWPPAQAALKD LTPIKFFLSHPELDCEW--  
SFFSGISKARAQQLMAGALIEEILEAVARFADPEATTHQSNKEKHFKYYGEEVDPVHLAYILDMFALVA  
TQVTVSDRLLKDRYVLNMKVFRGFTSLLWMSAQLGEKGPAATVITVGTIAGLGALVFIILLMRDSVIV  
ETLFYRYVY--MQGYSAAKD VADADPEHFLALAAASRDMEWVAIAPAFFYYFKTAT-  
FEPFNTAVAREFFGLFEERLRLIEVLCVPPPRVEELAEFVALAGTLATS AKALPGVIAFG-



CEPNAAGVLEAERDWNLHRTMGITLAFFKAQVSVKGWFDKGLHKDVAATGLREAGALTTPFHAQV  
DAKRCVPAVHRVVDLGEIEAGLIEIDSAVVVADEEQLADQPTTRDNSVGAIGGVLAGTMNMGASL  
EQVERGGNIIIEEQQYHAVNGANDGAKLTNTILMVLSRAYFPVIARTASASALDKGAFDLIQAPDD  
ADNLDHGKVLVIPAPTULAETAPLYAESDIDKIAWIAPMHLLGTLDVLLFEPDHYSFISMMIEASLDIT  
ETAEVLDYHVLEKGSRPPAFRKILIKGLHIRLLSAVGTILVVGSAGRTEVTAYIQGRAVPITMQKVTFPL  
AFAASSCKAVDIFSTMLRPPERSTIYMLILETVTEL-  
LEVTRLENDKLERIAILLPGLDMAAILGLVARAKDFAQIVTVAAAITAILSVAAEAVVLREMLLTKEIAVT  
ALALALALLMLTADQGLTQKWEAREAQMKELIQGGAVLQVRASDAMVLAATADKVRLSTDEGTT  
AFASLNLATVSDGFYVMSSAVLQLSSDLMMVVEVARVLADKETKNALVVRHPEQVKTOPTAEGSP  
GMVLQTLTDCIPPLAIKPEEVELLWTLVAALWRVKSHLASAMRPRIERVILILALGLIVVLLQSEGGGM  
GGG-  
VGSAAKILAGFSILTİKASVEDEVKVTRRVMDLNSRLGRPEEAVAPEFRGEELEQNKFEAENVEVDCLE  
TVRRFVDIPFLVSIRTQHNESEDGRARLVLDVTRVRFIDL-  
VTKRSEIILVKRAETDGIIARQMAKDLQALQPEAAALGKIAALDHFISLNDGHISNYVTAEVHSLGMLL  
LVLFIQQVRVAKVWVPTKREVTMVFI LAALAVFFIVIGLQINLVFMVGGISPLQITTLVLGEGVMAVRQ  
VSTFPAES-  
VTILQNTYADLICAGRVTKADIEKSLHIIVGARVARGTWYVIYHYEISQAQGPAGIMQRAFRQATLSQS  
LIDGRMEVKIKVVTSDRYA-  
THEIKGGQHRKGRYNRVKVGHNIPVDVLPRLKLAFGDPNLVLVKTFGAVVQKRFAQQLTHMRHGA  
VTIGPMEVSSPYIKSKKARHAPGDSVVTIKPENIVRSVAVVPELIWARENEDQSAVHDKYVKTTHKIAA  
KRNTAVDKAQYDKRNQVHLSFIGLAVKVLPEQAIVDATAGTLMATETVTVTEGLKGVAATIRLDPME  
KALIAYIKRMRPQLNLAGKTDKKIVKCLNNNLD DVEYGKLGRRKIKPITIKSVYDVEHERATELVKLMPY  
KDDVEGRKSQFAEK--  
ALFEPLQAFMMLYGFARAVYALYLRVIRRTIVLVKTKVVVNANTVLSAIKIVGVSIRLRHKSTNVAETKH  
HIKTIEARARMTLAGSPSVKLHLSEGRVGKKGRIKGFMPYKNYNIFDKLASGRRRAKVKEVAKLKVKVDK  
SISVDGIRTRQ-  
GGRIKADLSNALANTRVGVDIVGENEQEASNPRANAEMGQLFAGIDARVYSHVGALIGHALTAVLA  
SCTILGIGRAHVLLAVALRINAGIEFHSA- VAKAVAAA- YAQPAGEA-  
ILADVSEP NLGALALGDASVDVTRYGDRRLG-  
LKKTKEAYMELTCFSGKGDRVKIVEAMQTQAFEVVATRTAERFGIKAKGTYGKERAMMQIVPTKPVK  
VWVPFVGEDELLAPIRAFAETNGDGVTVVLSKDIKVTMFEKGVASLAVAGKNTSVVYTVLEKVTML  
KDIIYEQRAKAHYGRRLRSHVVTHTKSKRHLSLMRRTVVADPSMDAARLTDGEVSVITGATMAFVM  
SEQDAV--  
GEVDMHFHEEPQREAKLGIAGPETFLATEQPRLLALLFLREYLIHIVDIETQGGFADAATIYDMLRAMA  
AKLDRKLSAEIAKTRMCLHDDLAEMGVTQLAARRESAGDPILSAFWINGVTANADIIMLVANLECQV  
VPENIDCAVRLFYQRITLQAKERDGDVSVVLVKAQNQIEAAEGTVIYTIKGKTPSTTQAALNVEAISRSI  
VKSLAVQLFQVDHFVNDAWIATLLRAAHEVVYVDAHEGREAVDHVVERNTDLEFAPQKDIVARKIRI  
YTPAAPS AVVIWDPAIEREEKADAQGTILMIYGPDLQDISCFTDIGAEPKIESLSKWDEKEKYVVHRDDI  
PPDITTMVGKSSRVNKEFGIPDVAVCAPAKPGVTESIDRGEPKAGSCGEVANLPYPQESLVNRVSSAN  
VQKNISMVLGGHPVGEMGISRGIERHLETNMCEIFVDKDDVDVALDFYRIALTALRVGLDPPNAKVEI  
DGKESRKLIAVL DGEADLQRHPKVSEERGA LHKAETKARLPDDALIYDGVQHGDLSFTATDLPHGRV-  
VTPVNNNVKAQLEIDKVMLKTFHVVTLSFSNNKGDEHLIKRLNALKKSTRHYEMLLKIRDTECAGSP  
HAISVGKILKIDSLQTICVAHYTEIEPLLADDLTALGVMGDQGLLHVVPRLMILAVLSLLGLEAAFHLPQ  
WDLQAEALITDQTMGLAARSRDWSY- CISEVVGNTFFARTKDDDEQRLHARNPI-VLL-

CGKEGMV-  
ISPSGMRLASTAPGEAEHGNADTLILSTERLQDAMGYFVLRILLVFVDMVILAYGSGDEPLKFLVANQA  
ITGRANPQLVCLTRRTFPLDLQRDATFVMVFADATMKNLSHKMHMNLVLIKSGWVVNVSTKILIS  
DQAIASYAEDAGAHTQPSESALAAITSRVMAPIVMVVSQKPTAPSKTLFLEALNLLDEVTATVLNPKPR  
YFVFEGDVVAVLGTIDA AVLKGMQRPQPDRMRRAVVAAAIRLAIAG-  
ASGVLASLEAGVLNFSRAVDFARGCFAILALTLKPAIN-  
PALAFRVRNHKTSTKRDRPYKGHTKFLHKADTEKALVAEGVDTIA  
>GCA\_000203975  
AVIKPVEINKYAPVLMIRQQEVATVSGAGSPSLRAKTVYAKSGLQRKTM TKWVAKPIYF-  
GVLKMG NIVQLVSISVDNRAVCTVAQVVEQEVVVHGLVALDAVKRKIALEAMGGMTTEDPAKVAEF  
EAELDLKRFRDADARADMLPVMLGLTLEVKFD PHEPVVHDLAVPVIYEVI-  
GIMADKGGIEVDDCAISNAVSDVDPIAYVSPIDLEAVAGTEMAFIDQEA AVAAAARETIGLEELALEAGIL  
VVGIKPLLLPV-FGEEGDV-MSFAARSRTLGSIVALAVAAEELTRA-IDG- IASEM-  
MEAAQAAAAAEKRGTAEEIRIVKRMQRSSGLADDPELVILEDAAEGNSSWAGQIYDDPVSGSSES  
AGNIVHAANKRQNFARSITFLRKVEISDKAAAPLMRGVKHNSKSR SARKLDDPIAELNFPNVPPGIAIR  
AEAGKATDRLLHDAAEGELLLLIVVRWHVTWKTAVAIALVYAADDLVGLIELGGIAAVGRPDGVLNRH  
HKLNGSLIEQRPIIEKLT LRLRASLKEKLGKDQVIIFVVKVQGD LVADATIQMG-  
GPVGAVVAIQGELIFVRRHKQTVVTDQEATV-VLKGVAEGPADAQALLRIRVTHTLVGLSVLLIPE-  
PVLVESVQIREGVGKSLQIIQLDVYLLRDMGTGEETLAESKSRELIREVLAVDPITGVRLAFGKLKERMGK  
KLGLKDLET----  
LSILAAVTEPRMENLPEGVCRDFIAAGPAAAVGMVFLLLDDAGKLYQIDGDMRELTKSVKSLIGLVDTK  
APKVL SAGYAEERLRIRFADCEVLGTDAELYPYKEERRELLRMVPVYLILEAKRRQLIIFALS LKGGHRR  
MMALGVMLAAAIIESQA EKGEVHHGAPEILLDDAEVVGTSIMLSRQAALDLKQITKVDVIVIFPEFQEK  
MVVSLKFFCTEVAIFVIALITTVGEMLSREPEHAQEEGAGFQKRIRGHSTLFALAVLFDRKNCKDA-  
LPDLFLALGLAEPRYGVLYTNQPKKKQMPSEPDGDRVDGFELVHAVKEDATS-  
QELEMPEAMALAVE-  
DGSINLSAGVLAMNGGMVAIEKVDSKRKVALAATKWNISRLDLADVHISGAAPIRSCG-  
IEQADLSAALGAKKVWFLFLPGASNAELEEKL DGAGASTADAAEDKQIAILLVKPVLVVIQDSNSAGL  
ISNGGLEEWGTMAYKKHYAFAARMRLHMRTID-----  
DMAPNKQKSEKVKT VKLEGDTRFRQLATEGVKEQMP-LHALNP DFAV-  
LPLLVT PAVGSVAADENVLGAQVPVDASL-  
RELQKSQKGSALPITAVRLLGMRAARGMIEEDIMVAGKVAA-  
LLKIRALETVIAILLRNDTEATLPWRLSVAEKLEADTKRASGFAARPFKTKPSLCNTQAHSSIADPIQEIAA  
GYVAEEEEQFVPVEEVAIKLILSNPHSRVEEKKRGGEGHLHGMAKELLAKAVVMLRNEPGTNTTEGLLN  
YLTTNQPTDLLFEDCLDVIIDIRMSVV-----  
VHLNTV-  
HV VVKGVAPVGDYEIMSAKFPSGLVQVEQVDDRTGREKTL MWMYGAMEELWLLSVRWA EWWAN  
CAIGAILHVYAQELNRAFS LKRLQLDGWPKEAARWWNTWQLWLNKDGFFGYEAAFRAVKQVLKAT  
LFD FEMS NVEGVGRYQSKQELRVGYRIRQQVEFARLDPRADILLQAQTRLSIIRHALEVVA IILRDVAP  
EFTLVVAYQDVARGHVECVLAESFDFTEKNAHIGPVGLRTPAYIFGDGTVLKEAVLGKIDLANTVAEFR  
YLVILDGGRALGV EW----NMLYARIWLPPAQAALKNLLPICFFLQHP ELDLAWA--  
LFAGISKARADKLMAGALVEEILEGVARFADPEATTHQSKKAKHFKYYGEEVDPVHLAYILDLFALVST  
QVVVSDRLLKDRYVLNLKVFRGFTALWWLALQLAPKGPSATVITVG TIAGLGALVLF IILL-  
RDSVLVETLYRYVY--MKGYEAAKDVQDADPEHLLQLAAASRDIEWIEIIPAFFYYFDTAT-

FEPFNTAVAKEFFGLFEERLRIIDVLAVPPDRVAALVEFVALAGTLAISAEA-  
VGVIACGLCEPNAAEVLEAERDWNLHRSMGITLAFFEARESVMGYFDKGLHKDVAEIGLKEAGFTTH  
FRCDVDAKQVAPAVHRTL DLGEIEAALIEIDS AVVVADDEEQLADKPTRDKSVGAIGGVLAGTMN  
MGANLDSVERGGNIIIEEEEQYHAVNGKKADGKLT DKVLMVLSVAYFPVIRRFASANALDRGVFGLLI  
EAPEDADNLDHGH-  
MSIPAPT VLAETTPLYAEADIDKIAWIAPLHLLGTLPVLLFEPDFQGFISMMIDASLEIMETAEVLLDDYH  
VLEKGARPPKFRVILIKGLHIRLLAAAGTILVVGSAGRTEITAYIQGQAVPISMQKNTFLPAFSPSSCKAV  
DIFSTLLRPPERSVEMLIETVAEL-  
LEVTRGENEKLERLLVLLPGLDQAELLGLLAAQDFADIVTLGAAITAILSVAAEAVVREMLLTKAIEAIT  
ALALAIALLMLTGDEGLTQKWQAREAQMKELIQAGAVLQIHAADAMVLA STADKVRLDTDEGTTS  
AFASLNLATVSDGFYVLSSAVLQMSSDLMMIVAVARVLADKESKNALVVRHPEQVKTQPTYAEGSPG  
MVLQTLTGCIPLAVKPEEVELLWTLVAALWRVKAHLASAARPHTERVLILLLALGLIVVLLQSEGGGM  
GGG-  
IGAAAKLLAAFSILTMKASVGDVVRKVTRRVMDLSSRLGRPEEAVNPEFKGEELDQTKYEAENVEVDC  
METVRRFVDIPFLVSVRTQHNESED RGARLVLDVSRVRFIDL-  
VTKKS DVILVERVETDGIAREMAKDMQSLHDEAAALGKVSQ LQHFIALGDAHISNYVTAEAHSVLG  
MLLLVLFIQQVRVSKVWVPTRRVETMVFIMAAALFFLVIGLGLNIVFMVGGISPLQITTLVLGEGVMA  
VRQTSTFPAES-  
VTILQNTYADLICAGRVTKADIEKSLHIVVGARVARGTWVYIYHYEITQAQSPAGIMQRAFRQATLSQS  
LIDGRMEVKIKVVTSDRYA-  
TYEIKGGQHRKGTRYNRVKVGHNIPVDLLARIKMAFGPPNLVLVKTFGAVVQKRFAQPLTHMRHGA  
VTIGPMEVSSPYIQSKKARHAPGDSVVDIKPDNIVRSVAVVPELIWARENEDQSAVHEKYVKTT HKIAA  
KRNRAVDKAQYDKRNQVHLSFIGLAVKVLPEQAIVHATAGTLLPTESVSVTENLKGVAATIRLDPMEK  
ALIAYIKMRPQLNLQGKTDNKIVKCLNNNLD DVEWGKLGRRKIPITIKSVYDVEHEQATELVKLMPY  
KDDVEGRKSQFAEK--  
ALFEPLKAFMMIFGFIARSVYALSLRVVVRTIVLVKTKIVVNAETVLSAIIIGVSIRLRHKSTNIAETKHHIK  
TIEARARMTLAGAPAVKLHLRAGR VGKKGGRIKGYMPYKNYNIFDGLASGRRAKVADLAKLKKVDKTI  
AVEGIRTRQ-  
GGRLPKADLSNALSNTVRDVEVVGENVQEASNPRANAEMGQIFAAIDARVYSLVAALIGHALEAVLA  
LCAIMGIGRAHALLAVKLKMNAGIGMHSA A-VAAAVAAA-  
YSQPGGEATAIADVSEGLGALAISDGLDVCRLRRRQIG-  
LKKTKEAYMSLTCSFGKGD KIKIIEATQTQAYEIVATRTAERHGIHAKGTYGKERAMMQITPTKPVKV  
WVPV FVSDEELLAPVRAFAETNGDGVAVVKLAKDVKITMFEKGVASLAVTGKNTTVVYTVLEKVTELA  
KDIIYEQRAKAHYGRGRLRSHVVTHTKQKRHL SMMKRTTVADPSMNAARLSDGEVSVVTGATMAF  
VMSEQDAV--  
GDVDYHFHEEPRREAQLGIAGPETFLSTEQPRLLAMLFLREYLIHIVDIGTVGNFADAATIIDILRAMQN  
KLDRKLSADIAKVRMCLHDDVEDMGVKA EAARRDQAGDAILSAYWINGVTANNDIILLVANLECKTA  
PENIDCAVRLFYQRITLQAKERDGDVSVKLVPAQNQIEAAEGTVIYTIKGN NPSTVQMKNLIDAISRSIV  
KSLAVQLFQVDVFLNDTWIATLLRAAQDVVFVDAREGKEAVDHVIERDTDLEMAPQKDIVARKIRVY  
TPAAPS AVVIWDP AIEREDKADAQGTILMIYGPDLQDISCFTDIGAEPKIESLAAWDEKEKYVVHRDDI  
PEDITTLVGKSSKNKEFGIPDVAVCAPAKPGVTESIDRGEPKAGTCGEVANLPYPQESLVNRVSSANV  
QKNISMVLGGHPVGEMGISRGVERHLETNMCEIFVDKDDIDVALDFYKIALTSLRVGLDKPNAKVEID  
GKESRKLMAVKDGDASLQRHPKVSEESGTIRKAGEKAKLPDDTLIYDGVQHGDIKFTATDLPEGRV-  
VTPVFMSVKAQLEIDKVMLKSFHVVTLSFSNEKAEH LIKLRLNALKKSTRHYEMLLKIRDTECAQSPHA

IPVGKILKIDALLQTICKAHYTAIEPLLAEDLTALGVMGDQGLLHVVPRLMILAVLHLAPLEASWAIQW  
GLQQEAILTDQTMGLPVRERQWSY-AISEVTGNTFFARTKDDDTVERLHARNPI-VIL-YGKEGMV-  
ISPSGLRLASTAPSDKGHGNDKILSTERLQDSMYYYVLKVLLVFVDEIILAYGSGEEPLKFLVAHQAVT  
GREN PQLVCLTRRTFPLDLQRDATFVLVLADTTMKNLSHKKMHMNLVLVKPKSWVENVSTKILISDQ  
AIASYAEDAGAHTQPSESALAVITSRVIPIVLVVSQKPAAPSKTLFLEALNLYDDITATVQKRPKRYFIFE  
GDVVSVLGCMDAAVILGMQRPQPDRLRAVTARAI RLAIALRGSGLLASLEGGAINFSRAVDFAA-  
TYPGLEA--GLAIV-EALDFRVRNHKTSTKRDRPYKGHTKFLHKAEEKALIAEGVDTIA  
>GCA\_000220565  
AVIKPVTMDKYAPVLMIRQTEVATVSGAGSPSLRAKTVYAKSGLSRKTSTKWVAKPLY-  
GVLKMGKIVQLVSISVDARSVCTVAQVVEQEVVHGLVALQVVKRKIALEAMEGTTADPAKVAEFE  
DEIELKKWREADQRSDMLPVLLGLTLRIKFDPPHEPVVHDLVPVPVIFEVIG-  
IMAERGGIEVDECAISNAVSDVDPVAYVSPIDLDAVAGDKMAYIDQESAVAAVKEEIALEELALESTVL  
VVGIRPLLLPV-FGEDGDNPMFSFANRSRELNTIVDLAVTAVAQTRA----GFAAAM-  
MGRRLAMALAEKRGTAEEIRIVKRMQQAAGLADDPDLVFLDDAAEGNASWAGQIYDDPISGSSES  
SAGNIVHAANKRQITTSITFLRKVEISDKAAAPLMRGVKHNSKSRAARKVDDAIAELNFPNVPEGIAIR  
AAGGLESHTLLHDAEEGEEILMVIRIKVTWKTA FILLLLLAGDIVGLITLGGVAGVGKPDGILNRHHKL  
NGSLIEQRPIVEKLTGLRLASLKQKLGAEEQIIIFVVKVQGD LVADAKIQM-  
GGVLGAVVAIQGDVIFVRRHKQTLITDSESTIEVLRGVATGPADAEALLRIRVTHTTVVELSVLLIPE-  
PVLVDSVSIREGVGKALQIIQLDVYLLRDMGTGEETLAESASRETIREVLQVDPITGVRLAYGGIRERLGR  
KLNLKDLDTL---  
LALIRSVTEPRTETLPGGVHRNFVEAGPRAAVGTLFLVLSNAGKIFLIDGDLRELPKSVKSLIGLVDAKAP  
KVLSAAYLMGRRLRVFADCHVLISEADLYAYAEPRKELLRMVPVYLINA AKRRQLVILALSLKGGHKRA  
HAALGVMPAAALLESQAEQGETNHETPAILLDDAEIVGSSIMVSRQAAELKERTKVDVIVVFPEFQEK  
MVVSLKFFCTEVAIFVIALITTVGEMLSREPDTAQEGGAGYSKRIRGHSILFALVATFDRSNLGCNATPT  
LFLGLGLADPRFGMFYTNQPKKKQMPAEPDSDKVDGFDLVNAIKEDGAS-HELEMPEAMALAVE-  
SAKINLSAGVLAMKGGMAAVERVDSKRKLGLAAEKWNIARIPLLDVHLSGAASFRC CG-  
IEQADLSAALGKKEV--  
LYLLGASNAEEEEKLDGAGNSTVIVAERQPQILLVHPVLVVIQDSNAAGLISNGGLDEWGTMAYKK  
HYAFAARMRLHMRTIDAIEVGVAMEPNKQKSEKVKTVKLEGDTRFRQLAVEGVKEQMP-  
LHALNPDAFV-LPVLVTPAVGRVAADEKVLGARVPCDFSL-  
RELQKSQKGAALPISAVRILGMRAARGMIEEDIMVAGKVAA-  
LFKIGALETIIRIVLRNDSEATLPWRLSVAERLEADTRRASGYAARPFNSKPSLCDTQAHANVADPIETIA  
AGYVAAEERFVFPVEDIAIQIVLSSPHSRV-----  
TSGLLNYLT TNQPTDLLFEDCLDVIIDMRRMSVV-----  
--VHLNTV-  
HVVVAGTSPVGDFQIMTAAADSGLVQVEQVDERTGRERTLMW MYGAMEDLWTMSVTWADWVP  
DCAIGA-----  
INRAFSLTRLQIEGWPKAERWWNTWQLWLNKDGFFGYAAAFRALKQVLKQALADYQMSNVEGV  
GRYQSRQELRVGYRIRQQVEFERLDPRTDILLQAQTRLSVIRHAMRVTAILVLRDVVGEFSLV VAKEDV  
AMGHVECVLADCFSTEKNAHIGPVGIRTPETILGDGTVFKEATLGKVD FANTIADFRYRMLLDGGRR  
GVHWLTF-  
NILYERIWLPPAQAALKDLLPICFFLGHPELDLELDAEIWISISKARADKLMAGALIEGILEGVARFAQPEA  
TTHQSKKEKHFKYYGEEVDPVHLAYILELFALVSTQVTISDRLLKDRYVLNLKVFRGLTSLWWLALQLA  
DKGPAATIITLGTIAGLGALVLFILL-RDSVLIETLYHRYVY--

MRGYDAAKDVADADPEHLLPLSAASRDVEWIEIVPAFFYYFDTAT-  
FEPFNTAVAREFFGLFEERLRVIEVLAVPPDRVLELVDFVALAGTLAVSAEA-  
VGVIAVGLCEPNAAAVLEADQDWNLHRSMGITLAFYKAQESVKGWFDKGLHKGVA AISLEEAGAIST  
FNRCEAEAKKCVPAIHRMIDLGEMEAALIEIDS AVVVSEEEQTLADKPTTREKSVGCVGGVVLATGMN  
MGSNLDQVERGNIIIEEEEQYHAINGKKADGKLTDKVLMVISLSYFPVLARQASANAMDRGVFNLL  
IEAPEDADNVDHGGELSIPAATVHWETAPLYAEAEIDRIAWVAPIHMLGTLDVLLFEPDHYSFISMMI  
NASLEITKTAEVL-  
DYHVLEKGARPPAFRTILIKGLQVRLLAALGEILVVGSA GREETTAYIQGSAVPITLRKRTFLPAFAASSCK  
VVDIFSTMLRPPERSTVQMLILETV AEL-  
LEVTRGENDKLERILALLPGLDMAVLLGLLALAADFSDIVTLDAAITAILSVAAEAVVLRLLLLTSEIAISA  
LAMGLALLMLTGDQGLTQKERAREAQKELIQGGAILQSHARDAMVLAATADKVRLSTDEGTTSAF  
ASLTLATVSDGFYVLSSAVLQMSSDLMMVVTVARVLADKEQKNALVVRHPEQVKTQPTYAEGSPG  
MVLQTLTGCIPLAIKPEQVELLWTLVAALWRAKAHLAEAQRPRLERVLVLILALALIVVLLQSEGGG--  
MG-MGAAAKVLAASFLLTVKASVGDEV RKVTRRVMDLNSRLGRPEEAVNPEFRGEELEQTK---  
ENVEVDCMESVRRFVDIPFLVSIRTQHNESEDRGARLVLDVTRVRFDL-  
VTCKSEILVERAETDGIAREMAKDLQALHADLAALGKVAFLDHFIALSDAHISNYVTAQIH SVLGMLL  
MVLFIQQTRIGKVAWPTRREVTMVFMMAAISVFFLVIGL--  
KIVFMLGGISPLQITTLVMGEGVMAVRQTSTFPAEA-  
VTILQNTYADLICAGRVTKADIEKSLHIVVAARVARGTWYVIYHYEITQAQGEAGILQRAFRQATLSQS  
LIDGRMEVKIKVVTSDRYA-  
TYEIKGGQHRKGT RFLRVKVGHNIPVEILPRLKLAFGPPNLILVKTFGAVVQKRFAQPLTHIRHGAVTIG  
PMEVASPYITQKKARHAPGDSAVDVKPDNIVRSVAVVPELIWARENEDNSAVHDKYVKTT HKIAAKR  
NRAVDKAQYDKRNQVHMSFIGLAVKVLPEQAIVGATAGTLLPTEAVAVTEGLKGVAATIRLDPMEKA  
LVAYIKRMRPQLNLQGRD K KIVKCLNNGLDDVEWGKLGRRKIKPITIKSIYDVEPKESTELVKLIPYKDD  
VEGRESQFAEKELALFEPLKAFMMMFGFIARAVYALSLRVVRRTIVLVKTKIVVNANT---  
AIKIIGVSIRLRHKSTNVADTKHFIKTIEKRARMTLAGSPAVKLNLRAGKV GKKAGRIKGYMPYKNFNIFE  
GLASGRRAAVKELAKLKKVDKEITVEGVRTRA-  
GGRLPKAAISNAFANTRVGVDIVGENEQUEESNPRANAEMGQIFAAIDARVYHLVAAMIGHALEAVLA  
VAAILGIGKAHVLLAVKLVNAGIEFHSA-----  
YAQQGGEEAAAADISEAYLGDLLVTETSLDTCRLRRRGV GELKKTKEAYLKLTCFAGKGEKV KILAATQ  
RQAYEIVATRTAERHGIHAKGTFGKERAMMQITPTKPVKVWVPIFVSEGELLSPVRAFAETNGDGV DV  
VKLTDDVKITMFEKAVASLAVAGKSSSVIYTVLEKVTELSKDIIYEQRSKAHYGRGRLRSHVVTHTADKR  
HLSMIKRTTVAKPRMDAERLTDGEVS VVTGATMAFVMSEQDAV-  
DSDAPMHFHKEPRREAALGIAGPETFLATEQPKVLVLLFLREYLIHIVEIESVNGFADAATIYEILRPLQNK  
LDRKLSADIKVRMVLHDNVANMGVKQEAPRRDQAGDAILYWINGVTANVDIILLVANLEIKCVP  
ENIHCAIRLFYQRVTLQAKEREGDVSVRLVKAQNQIEAAEGTVIYTIKGQTPGTVQMRLNIEGISRSIVK  
SLAVQLYQVDLFTNDTWLGTLLRAAEVVYVDAKEGKEAVDHVVERD TDLEMAPQKDIVRRKIRIYTP  
AAPSAVVIWDPAIERENKAEAQG TILKIYGPLDQDISCFTDIGSEP KIESIKSWDEKEKYVVHRDDIPDPI  
-  
VMVGKSAKVNKEFGIPDVAVCAPSKPGVTESIDRGE PKAGTCGEVANLPYPQESLVNRVSSANVQKN  
ISMVLGGHPVGEMGISRGVERHLETNMCEIFVDKPDVDVAKDFHLLALTPLRVGLDRPNAKIEIGKES  
RKLMAVMDGDAKLQRHPKVSAATG--RKAGEKAKLPDDALIVDGVMHGDISFTATDLPEGRV-  
VTSVANNVKAQLQIDKVLLKTFHVVTLSFSNDKGEEHLIKRLNALKKSTRHYEMLLKIRDTECAQSPH  
AIPVGKILKIDALLQTCQAHYTAIEPLLADDTALGVMGDQGLLHIVPRLMILAVLYLIDLEAMHVP R

WQLQQRAIVTDQTMGLAARCRAWSF-AISEVVGNTFFASTRDDETEQRLHARNPV-VLL-  
YGKMGMT-  
ISPSGLRLQSTAPTELNTGNENKLILSKERLQDEMEYYVLRILLVFVDEVILAWGSGEAPLKFLVAEQAIT  
GRDNPGLVCLTRRTFPELEQRNATFVLVFEDSTMKNLSHKKMHMNLVLVKSkgwvvnvstkilisdq  
AIA SYAEDAGAHTQPSESALAIITSRVIAPIVLVVSQKPTAPSKTLFLEALNLLDAVTTTILNPKKYFIFEG  
DVVSQLETIDA AVLKGMQRPQPDRMRRAVVAQAIRLAIALRASGLVAELEAGRLNFARAVTFAARLY  
APLALLCAPAIPPQALEFRVRNHKVSTKRSRPYKAHTKFLHKSDEEKALIAEGVDTIA  
>GCA\_000259095  
AVIKPVVMKVYAPVLMIRQSQVATVSGAGSPSLRAKTVFRKSGLQRKVSTKWVASPLYF-  
GVLAMGKIVQLVSISVDNRAVCTVAQLVEQEVVRGLVALAGVKRKIALEGIEGMTAEDPAKVVEFED  
ELDLKRFRDADDRADLLPVLLGLTSLIRFDPHEPLVHDLPPVPVIFEVL-  
GIMAERGGIEVDQCAISTAVSDVDPLAYVSPID---  
VGGDKMAYIDQAAAVSAAKDEITLEELALESTVLVVKI-PLLIPV-FGDDGGN-  
MSFAKRSRELASIVDLAVSALATTRA-ID-GIASAM-  
MVRAQAAAAAEKRGTAEEIRIVKRMQSAAGLADDPDLVMLEDAAEGNAAWAGQIYDDPISNSSES  
SQGNIVHAANKRQNFARSITFLRKVEISDKAAAPLMRGVKHNSKSRASRKVDDAIAVLNFPNVPEGIA  
IRAEAGKSADTLLHDATETEEILLIVRWDVTWKTA AIVGLLFLAGNAVGMIDLGGIAAVGKPDGLLNR  
HHKLNGSLIEQKRIIDKLT LRLRASLKEKLGAE SVIILVVKVQGD LVADATVQM-  
GGVVGAVVAVQGDVIFVRRHRQTVVTDSESTV-VLRGVAEGPAEAQALLRIRVDHTLVEVSVLLIPE-  
PVLVDSVSIREGVGKALQIIQLDVYLLRDMGTGEETLAESVSRELIREVLQIDPITGVSLAYGGFQERASK  
ALT LKELETL---  
IAILAGVTEPRMENLPDGVRRTFIRAGPRAAVGMLFLLDDAGRIYDIDGDLRELPKSIKSLIGLVDAKTP  
KVL SASYATARLRIRFADVSVLESEANLYAYAEERKELLMVPVYVINEAKRRQLVIFALS LKGGHRRAR  
AAIGVLLAAALLESQAQNGDVHHAAPAILLDNAE VGTAVMISRQA AVELKHILRIDVIVVFPEFQEK  
MVVSLRFFCTEVAIFVIALITTVGEIISREPEHAQESGAGFQKRIRRHSM LFALQCTFDRRNLD DA--  
PTLFLALGLAAPRYGVMYINQPKKKQMPSEP DGD RVDGFELVHAVKADAAS-  
EELEMP EAMALAVE-  
SAKINLTAGVIAMTGGMADI ERVDSKRKLALAATKWSIAQLEALDAHFSGAAQVRCVR-  
IELATVSAALTSKKV--  
LYLLGASNAEFEEKLDGAGNSTIDIAEDRQRLILLVHPVIVVIQDSNAAGLVSNNGGINEWGT MAYKK  
HYAFAARMRLHMRTIDAIELGQELEPNKQKSEKVKT VKLEGDTRFRQLAVEGVKEQMP-  
LHALNP DFAALVPVLVTPAVGQVAADAEVLGADVPVDFSL-  
RELQKSQTAAALPISGVRLLAMRAARGMIEEDIMVAGKVAA-  
LLKIRAQETVLDIVLRNDSEAWGPWRLSVAERIEADTARASGYAARPFKTKPSLCNTQAHANLAEPIQ  
EIAAGYVATESRFVFPVEGIAIQIVLASPHSRVQTAKRAGEGHLHEMAKELVAKAVIMMQNAPATTTE  
GLLNYLT TNQPTDLLFPDCLDVIIDLRRMAVV-----  
IHLTTI-  
HVVPVGV RDVAAFQIMTAAAPSGLVQVESVDDRTGDSRTLMMW MYGAMEELWLLSVTYADWVKD  
CAIGAIVLHVYAQTINRAFS LTRLQLEGWPKEADRW WNTWQLWLNKDGFFGYEAAFRAQAQVLKA  
ALYDYDMSDTEGVGRYQSRQQLRVGYRIREQVKFTRLDPRTDILLQAKTRLSVLRHALAVVAILV LREV  
VGEFTLVVAMEDVAMGHVECVLADCF SFTEKNAHIGPVGLRTPDPIFGDGTVLRDAVLGKIDLRNTV  
REFRYRMIIDGGRELGVQWISL-  
NIMYSRIWVPPAQAALKDLLPICFFLSHPSVNLKAW SLLFSGISKARA AAKLMAGALVERILDPVAAFAV  
PEATTHQSHKAKHFKYYGEEVDPVHLAYILELFALVATQVTVSDRLLKDRYVLNLKVFRGFTSLLWMS

AQLGDKGPSATIITVGTIAGLGALVLFILL-RDSVLLETIFYRYVYV-  
MRGYQAAKDVADADPEHLGPLAAMTRDVIEWVPAFFYYFDTAT-  
FEPFNTAVAKEFFGLFEERLRVIDVLAVPPDRVDALSEFVALAGTLPTGARALAGIATGLCEPNAAAVL  
EADQDWNLHRSMGITLAFYKAQKSVKGFWDKGLNKAVAATQLTEAGALTSTFAASATARQCCPAV  
HRVIDLGEIEAALIEIDSRVVVADEEQTLADKPPTREKSVGCVGGVLAGTMNMGANLDQVERGNII  
IELEEEHYSAVNG-KADGKLTDKVLMV-----  
FPVLARWASANALPRGVLGLLIQAPNDADNLDHGGQMVIPAATIIHAETAPLYADAEIDKIAWIPIHL  
LGTLDVL- FEPDQYSFISMMIDASLEIMDTAEV--  
DYHVLEKGARPPSFRTILIRGLHIRLLAAVGTLVVGSAGRDEITAYIQTRAVPITLNRHTFLPAFSASSCL  
VVDIFSTMLRPPERSAVMTLILETVAEL-  
LDVTRGENDKLERILVLLPGLDSAALLELVAAGDDFSNIVTIGAAITAILSVAAERVVRELTKAEIAVT  
ALALALALLMLTGDQGLVQKELAREQQMKELIQGGVVLQIHAADAMVLAADKVRGTDEGTTS  
AFASLNLATVSDGFYVLSAVLQMSSDLMMIVGVARVLADKETKNALVVRHPEQVKTQPTYAEGSP  
GMVLQTLTGMIPLAIKPEQVELLWTLVAALWRVKAHLAEAAARPHHERILVLILALSIVVLLQSEGGS  
MGGG--  
SAAAKILAAFSLLTLKASVGDEVKVTTRVMDLNSRLGRPEEAVNPEFRGEELEQSKYEAVNEVDCM  
ETVRRFVDIPFLVSTRTQHNESEDGRARLVLDVTRVRFDL-  
VTKKSEILVERAETDGVIAAGLAKDLQSLQAEIAALGKIAALQHFISLNDGHISNYVTAEIHSVLGMLLL  
VLFIQQTRIGKIVWPSRREVTTVFIMAALATFFLVIGL--  
NLVFMVGGISPLQMTTLVLGEGAMVVRQT-TFPAES-  
VTVLQNTYADLICAGRVTKADIESSLHIVVGARVARGTWYVIYGYEITQAQGEAGIMQRAFRQATLSK  
SLIDGRMDVKIKVVTSDRYA-  
TYEIKGGQHRKGTRFLRVKVGHNIPVEVIPRLKMAFGPANLILVKTFGAVVQKRFAQPLTHIRHGAVTI  
GPMEVASPYITNKKARHAPGDSVVDIKPENIVRSVAVVIELIWARENEDQSAVHDKYVKTTHKIQAKR  
NAAVDKAQYDKRNQVHLSFIGLAVKVLPEQA-----  
-  
RMRPQLNLAGKTDKKIVKCLNNGLDDEYGKLGRRRIKPITIKSVYDVEHREATELVKLLPYKDDVESR  
KSQFAEK--  
AIFEPLRAFMMFLFNYIARAVYALSLRVVRRITVLVKTKVVVNANTVLSAITIIGVSIRLRHKTNNVADTKH  
HIKTIEARARMTLAGTPSVKLNLRPGKIGKGGRIKGYMPYKNYNIFDGLSSGRRATKELAKLKKVDKT  
IEVGGIRTRQQGGRLPVADLSNALANTRVGVDIVGENEQEESNPRANAEMGQVFAAIDARVYHLVA  
ALIGHALEAVLALCDIWGIGKAHALLAVTR-VNAMIELHSAA-VDTAVAAA-  
FHEPAGEATTLADVSESYLGALLLTVLSLDVLRRLRRRQLG-----  
-----  
RFGIKAKGHFGKERAMMQITPTKPVKVVVPVFDVEEELLAPIRAFAETNGDGITVVKLTDDIKITMFEKG  
VASLAIAGKSTTIVYTVLEKVTLSKDIIYEQRAKAHYGRGRLRSHVVTHTKQKRHLMSMIKRTVVAQPR  
MEAARLTDGEVSVVTGATMAFVMSEQDAV--  
GDVDMHYQEEPRHEAELGIAGPETFLSTEQPRVLALLFLREYLIHIVEIESVGGFADAATIIDILRAMHN  
KLDRKLSAEIAKVRMCLHDDVADMGVRQEAPRREAAGDPILSAYWINGVTANADIIMLCANLECATV  
PENIDCAIRLFYQVRVTLQAKERDGDVSVALIPAKNQIEAAEGTVIYTIKGVTPGTIQMKNLVEAISKSIVK  
SLAVQLYQVDFINDTWIATLLRAADDVIYVETQEGREAVDHVIERDQELEFAPQKDIVRRKIRIYTPAA  
PSAVVIWDPADREDRADAQGTILKIYGNLQDISCFTDIGSEPKIESLKAWDEKEYVVRDDIPPD-  
TMVGKSAKVNKEFGIPDVEVCAPSKPGVTESIDRGEPKAGSCGEVANLPYPQESLVNRVSSANVQKNI  
SMVLGGHPVGEMGISREVERHLETNMCEIFVDKDDIDVALDFYELDLT-

LRVGLDRPNAKVEIDGKESRKLMVLDGDANLQRHPKVSEAAGTGVGAGRKANLPDDALIFDGVHH  
GDLSFTVTDLPEGRV-  
VTPVTIAVKAQKIDKVLKTFHVVTLSFSGNKGEEHLIKRLNALKKSTRHYEMLLKIRDTECAQSPNAI  
PVGKILKIDKLLQTICTAHYTAIEPLLADDTALGVKGDQGLLHIVPRLMIMAVMTLWGLEVDLTHPSW  
GLMARLNLTDMGLAMRERHWSY-CIAEVVGNTEFFAMTRDDDTTERLHARNPI-VLL-  
YGKFGMT-  
ISPSGLKMASTAPSAEHGNDILLILSAERLQDSMSYFVLHILLVFVDEILAYGSGDRPMKFLVAHQAV  
TGRANPQLVCLTRRTFPVELQRDATFVLVFEDSTMKNLSHKKMHMNLVVIKSKGWIVNVSTKILISDQ  
AIASYAEDAGAHTQPSESALAAITSRVIPIVLVVSQKPTAPSKTMFLEALNLYDQVTATVQNRPKRYI  
FEGDLISVIGHLDAAVLKGMQRPQPDRLRAVVAAAIRLAIAALGSGVLARLQQGLINFARSITFAR--  
-----GFRVRNHKVSTKRSRPYKAHPKVLMKADTEKKLIAEGVDTLA  
>GCA\_000299875  
AVIKPVTQNVYAPVLMIRQTEVATVSGAGSPSLRAKTVFAKSGLQRKVSTKWVLKPLY-  
GVLKLGKIVQLVSISVDNRAVCTV--  
MVEQDVVVHGLVALEVKKIALEALDGMTTEDPAKVADYEELELKRFRDADDRADMLPIMLGLTL  
KIAFDPPHEPVVHDLPIPVIFEVSTIMAERGIEVDECAISTAVSDVDPIEYVSPIDLAAGVAGDKMAYIDQ  
EAAVSAAKDDIAL--LALESSVLVVGI-PLLLPI-FGAEGGT-MSFANKSKELGTIVDLAVAAVAELRAR-  
-QGIASSM-  
MVRAQASALAEKRGTAEQIRIVKRMQKSSGLADDPELMVMEDAAEGNSSWAGQIYDDPISGSSES  
SAGNIVFAANKRQATDRSITFIRKVEITDQAAAPMMRGVKHNAKSRAARKVDDAIAELNFPNVPEGI  
AIAAAGGTPNDTLLHDAEEGEEILMVVRWKVTWKTAAVIVLTAGDVFGMIEIGGFAAIGKPDGVL  
NRHHKMNGSLIEQKRIMDKLTLRLRAALKQKLGAENVILVVKVQGDVLVAAAKIQM---  
SIGAVVAIQGELIYVRRHRQTITDQEATVEILKGVAEGPADAEALLRIRVTHTIVELSULLIPE-  
PVLVDVAVSIREGVGKALQIIQLDVYLLRDMGTGSETLAESMSREAIREMLAIDPITGVRLAYGKLKERQG  
KALGIKEMDTIF--LRIL-  
GLTEPRMADMPQGVCRKFVAVGPKAAVGTVFLLLTDAGKLYTIDGDMRELSKSIKAMVGLTDAKAPK  
VMSAQYATARLKIRYADCTVMTTEADLYAYAEERKELLRMVPVYLINAAERRQLIFALS LKGGHRRAM  
ASLGVLIAAAILESQAERGPVHHKEPAITLQDAEIVGSEMMISRQAALALKMVFRIDVIVIFPEFQEKMV  
VSLKFFCTEVAIFVIALICTVGQMLSREPNAAQEGGAGFTKRIRKHSVLFALDVTFDRMNCKVDATPDL  
FLALGMAPPRIYIYTNQPKKKQMPTEADGDKVDGFELVNAIKEDGASNHVLDPEAMALAVEADA  
AINLTAGVLGLNGAMAAIEKVDNKRKIALAVEKWNIAKIEALDVSISGAAPFRALS-  
IELADISAALNSKDIWFLFLPEASNKELEAKLDGQAGSSTADAAADRQKAILLVLPVLVVIQDSNAAGLI  
ANGGLEEWGTMAYKKHYAFAARMRLHMRITID-----  
MIPNKQKSEKIKTVKLEGDTRFRQLATAGIKEQMP-  
LHALNPDAFVLLPVLVTPAVGEVAADKECLGAGVPVPFSL-  
RELQKSQSGAALPITAMVILDIKQARAMIEEDIMVAGKVAA-  
LFKIRATTTIFEIVLRNDSEATIPWRLSVADRLEADMARAGGYAARPFSTKPSLCDVQAHAKVAEPIETIA  
AGYVATEERFVFPVEDIAIKLILASPHSRVGAACKRAGEGHLHEMAKELLAKAVVMVKNEPNTNTEGTL  
RYITTGQPTDLLFEECLDIVIDMRRMSVV-----  
LHLNTI-  
HVVPVGARDVAAFEIMSAAFDSGLIQVERVDDRTGRERTSMWMYGAMEDLWTLSTITYADWVKNCA  
IGAIILHVYAQTLNRAFSLTRLQLSGWPQDAARWWNTWQLWLNKDGFFGYEAAFKAVKQVLKADL  
AEYDMKDVGVGRMLSRQEVRAGYRIRENVDFNRLAPRTDILLQSRTRLSVLRHALQVVAILVIRDVV  
GEFSVVAQEDVAMGHVECVLADSFDTAKNADIGPVGLRTPDTIFGDGTVLQEAVLGKIDLSNTVA



DFRYLFIIDGGRELGVWWITV-NMIYARIWVPPAQADLKDLPICFFLSHPQLDLLLED-  
LFAGISKARADKLMAGALVEEILADIARFADPEATTHQSHKEPHFKYYGEEVDPVYLAYILTLFGLVATQ  
VTMSDRLLKDRYVLNLKIFRTFTSLLWYGLALAEKSPAATAITLGTVAGLGALVLFILL-  
RDAVILETLYYRYVY--MLGYKAAKDVADAPPEHFGPLAAASRDMEWIEIVPAFFYYFRNAK-  
FEPFNTAIAKEFFGLFKERI---EVLAVPPDRVEALVEFVALAGTLATSAEAAPGIIAAG-  
CEPNAAEVLEADQDWNLHRSMGITMAFFKAQESMNGWFDKGLHKGVAASILEEAGAMTSTNDCA  
VREHECCPAVHRVLDLGEIEEALIEIDSASVVVSAEEQTLADKPTTRNKSVGAVGGVVLAGTMNMGAN  
LDSVERGNIIIELEEEGYHAVNNGRKGDKLTNKMVLSEAYFPVLRRLASANS�DRGVFGLLIQAPSD  
ADNLDHSKNMTIPLPSIHAETHALFAEDDIEKIAWVAPLHLLGTIPAVLEFEPDYYGFISMMIEASLDIM  
KTAEVLDYHVLEK GARPPSFRVVLIRGLHIRRMAAIGTIIVVGSAGRDEVTAYIEGRAVPISLKKHSFLP  
AFAASSCEVVDIFSTILRPPERSSIVTMIETVAEL-  
LEVTRIENDKLERLMLLLPLGDASEILGLVAAAKDFAQIVTLSQAIVAILSVAADAVILRELLTLAEIAISSL  
ALALALLMLTPDEGLTQKEAAREEMDKELIQAGVVLHSHAEDQMVLAAATADKVRLDTDEGTTSFAFA  
SLNLATVSDGFYVLSSAVLQLSSDLMMIIAVARVLADKETKNALVVRHPEQVKTQATYAEGSPGMVL  
QTLTKCVPPLAVKAEIEELLWTLVKALWNVKAHF AEAPRNERILILIALCLIVLLQSEGGG--MG-  
VTAAAKIFAGFSLLTLKAAVGDEV RKVVRVMDLNSRLGKPEEAVGAEFRGAELEQNKYEAANVEVD  
CMETVRRFVDIPFLVSIRTQHNESED RGARLVLDVTRVRFIDL-  
VTKRSDVILVEKTETDGVIAREMAKDLQALHPEVAALGKVSAL EHFISLQDGHISNYVTQAIHSVLGML  
LLVLFIQQVRVTKIVWPTRREV TMVFVMAALGTFFLVIGL--  
QLVFM LGGISPLAITTLVLGEGVMGVRQTSTFPEDS-  
VTILQNTYADLVCAGRVTKADIEASLHIVVAARVAKGTWYVIYHYEISQAQQEEGIFQRAFRQATLSQ  
SLIDGRMEVKIKVSSDRYA-  
TYEIKGGQHRKGTRFNSVKVGHNIPVDVLARIKMAFGPANLILVKTFGAVVQKRFAQPLTHTRHGAVT  
IGPMEVASPYIKSKKARHAPGDSAVSLKPDNVVRSVAVVVELIWARENEDNGAVHDKYTKTTHKIAA  
KRRTAVDKAQYDKRNQVHLSFIGLAVKVLDPQA-----  
---  
KMRPQLNLQGKTDNKIVKCLNNNLDDEVWGKLGRRKIPITIRSVYDVEHKEATELVKLMPYKDDVES  
RQSQFAEK--  
AIFEPLKAFMMLFGFIARAIYALSLRVVRRTILLAKTKIVVNAATVLSAIIIGVSIRLRHKTTNIADTKHHIK  
TIEKRARM TLAGAPNVKLHLRAGRVGTGGRIKGYMPYKNFNIFEGLSSGRRAKVKELAKLKKVDKEIT  
VEGIRTRAQGGRKPIADLSNALANTRVGVDIVGENEQEESNPRANAEMGQIFAAIDARVYHLVGALIG  
HALEAVLALCSIWGIGRAHALLAIW-KMNANIELHSAA-VPVAVAAA-  
YAQSGGEAAAML DVSEADLGDISLSEQTVDVSRARRRQLSE-----  
-----  
RHGIHAKGTFGKERAMMQILPTKPVKVWVPVFVTEEE LAPIRAF AETNGDGVTVVKLT KDIKITMFEK  
AVASLAVTGRSSSIVYTVLEKVT ELMKDIIYEQRAKAHYGRGRLRSHVVTHTKSKRHLSMIRRTTVVASPS  
VDAARLTDGEVS VITGATMAFVMSEQDAV--  
GDVDMHFHEEPREAE LGISGPERFLTTEQPRVLALLFLKAYLIHIVEIETVGGINNQATIYDILRAMQN  
KLDRKLSAEIAKTRMCLHDNLAHMGVTAESPRRDTAGDHILSSYWINGVTAKADIILLVANLETRCVP E  
NIQCAIRLFYQRITLQAKERDGDISVRLVPAKNQIEAAEGTVIYTIKGKTPGTLMKLNVEAISRSIVKSL  
AVQLFQVDLFINDTWIATLIRAASLVFVDAKEGREAVDHVVERDTELEMAPQKDIVRRKIRIFTSPAPS  
AVVIWDP AIDRAEKADAQGTIIKIYGPNLQDISCFTDIGAEPKIESLKAWDEKEKYVVHRDDIPEDI-  
TLVGKSSKVNNEFGIPDVEVCAPAKPGVTESIDRGE PKAGSCGEVANLPYPQESLVNRVSSANVQKNI  
SMVLGGHPVGEMGISRGIERHLETNMCEIFVDKPDVDVALDFYTL SLTVLRVGLDRPNAKVEIDGKES

RKLMAVRDGAATLQRHPKVSESGSTR-KAGTKAKLPDDALILDGVLHGDVKFTVTDLPEGRV-  
VTPVVLSVKAQLSIGQVILKTFHVVTLSFSSGKGEDHLIKLRLNALKKSTRHYEMLLKIRETECAESPHAID  
VGKILKIDSLQTICQAHYTAIEPLLADELTA LGVMGDQGLLHIVPRLMILAVLHLWKLEARFVVKTWGL  
QARAIITDQTMGLQQRERQWSF-AISEVVGNTEFFARTKEDDTEQRLRARNPI-VLL-YSKEGMV-  
ISPSGLRLESTAPDAMEHGNAEDLILSRERLQDAMGYVLRILLVFVDEIILAYGSGKAPLFLVADQAV  
TGKENPGLVCLTRRTFPLELQRDATFVLVFEDSTMKNLSHKKMHMNLVLIKSKGWVVNVSTKILISDQ  
AIASYAEDAAAHTQPSESALAVITSRVIAPIVMVVSQKPSAPSKTMFLEALNLYEAVTSTVLNPKPKYYIF  
EGDVVAKMSTLTGRLLVGILLVMPRVFRIACVAAAALRMAIAW-----  
-----AFRVRNHKVSTKRSRPYKGHTKFLHKSELEKALIAAGVDTLS  
>GCA\_000376545  
AVIKPVEINKYAPVLMIRQTQVATVSGAGSPSLRAKTVFRKSGLQRKTMTKWVQSPLY-  
GVLKMGNIVQLVSISVDNRAVCTVAQVVEQEVVVHGLVALDAVKRKIALEEMDGMTTEDPAKVAEF  
EEEDLKRFRDADARADMLPVMGLTLQVRFPHEPVVHDLPIPIYEV-  
GIMADRGGIEVDDCAISNAVSDVDPIAYVSPIDLAAVAGEKMAYIDQEA AVGAAKEEIALEELAESV  
LVVGI-PLLLPV-FGAEGAV-MSFAARSRTLESIVGLAVAAAELTRA-ID-GIASTM-  
MTAAQAEALAEKRGTAEEIRIVKRMQRSSGLADDPDLVILEDTAEGKASWAGQIYDDPISGSSESDSL  
GNIVHAANKRQNFARSITYLRKVEISDKAAAPLMRGVKHNSKRSARKVDDAIADLNFPNVPAGIAIK  
AIAQKPEDRLLHDATETEGILLIVVRWHVTWKTATIAIGLTFLAGDIVGLIALGAIAGIGKPDGLLNRHHKL  
NGSLIEQRPIIEKMTLRLRASLKEKLGKDQIIIFVVVKVQGDLVADATVQMG-  
GPVGAVVAVQGDVIFVRRHKQTVITDSESTV-ILRGVAEGPADAEALLRIRVEHTLVELSVLLIPE-  
PVLVDNVSIREGVGKSLQIIQLDVYLLRDMGTGEETLAESKSREVIREVLAI DPITGVRLAYGKLKERAGK  
KTGLKDLETLF--RSILP-  
VTEPRMENLPEGVCRTFITAGPRAAVGMLFLLLDEPGKLYPIDGELRELTKSVKSLISLVDKVPKVL SAG  
YAEERLRIRFADCEVLASEAELYAYKDERREMLRMVPVYIINEAKRRQLILFALS LKGGHKRAMMALGV  
MLAAAIIESQA EKGAVHHDEPAILLED AEVTGTSIMVSRQASLELKHVSKVDVIVIFPEFQEKMMVSLKF  
FCTEVAIFVIALIVTVGDMLSREPEHAQEDGAGYAKRIRGHSVVFALEVT FDRRNCRSA-  
LADLFLSLGLLPIRYGVLYTNQPKKKQMPSEPDGDRVDGFELVHAVKEDGSSNHELEMPEAMALAVE  
ATETINLSAGVLAMTGGMVAIERVDSKRKVALAATKWNISRLELLDVTISGAAPVRCCG-  
IEEAGMSAALGKKKV-  
FLYLPGASNAELEEELKNGAGNSTADVAEDRQREILLVHPVLVVIQDSNSAGLISNGGLDEWGT MAY  
KKHYAFAARMRLHMRTIE-----MEPNKQKSEKVTKVKLEGDTFRQLAIEGVKEQMP-  
LHALNPDFAV-LPLLVT PAVGSVAADAQVLGATVPVDASL-  
RELQKSQKGSALPISGIRLLDMRAARGMIEADIMVAGKIAA-  
LFKIRALETIIGIILRNDSEATLPWRLSVAERLEADTKRASGFAARPFTKPSLCTTQAHARIADPIQEIAA  
GYVASDERFVFPVEDIAIRLILYNPHSRVGEKKRGGEGLHAMAKELLGKAVVMLRNEPGTNT EGLLN  
YLTTNQPTDLLFEDCLDVIIDIRRM SVV-----  
VHLNTV-  
HVVVKGADVGDYEIMNAAFPSALIQVEQVDDRTGEEKTLMW MYGAMEELWLMSVRWADWVA  
NCAIGAILHVYAQTLNRAFSLKRLQLDGWAKEAARWWNTWQLWLNKDGFFGYEAA FRA-  
KQILKAALADFEMKDVEGVGRYLSKQEIRAGYRIREQVAFARLDPRTDILLQAKTRLSIIRHALQVVAILI  
LRDIAEFT-  
VWAYQDVARGHVECVLAESFDFTEKDAHIGPVGLRTPDPIFGDGT VFEAVLGKIDLANTVAEF RYLV  
LDGGRELGV EWWTLQNMLYDRIWLPPAQAA LKNLQPICFFLQHPELDM-----  
ISKARAEQLMAGALIEEIEAVARFADPEATTHQSKKAKHFKYYGEEVDPVHLAYIFTATALVATQVVLS

DRLLKDRYVLNLKV-  
RALTSWWLSLQLAKEGPCATIISVGTISGLGALVLFILLMRDSVLVETLYYRYVY-  
VMRGYSAAKDVQDADPEHLELAAASRDIEWEIIPAFFYYFDTAT-  
FEPFNTAVAREFFGLFKERLRVIEVLAVPPDRVEALVEFVALAGTLAISAEALPGVIACGLCEPNAAGVLE  
AERDWNLHRSMGITLAFPEARSDVKGYFDKGLHKAVAEFSLKEAGAMTTHFRCDVEAKQVVPVAVHR  
TLDLGEIEAALIEIDSAVVVSEEEQTLADKPTTREKSVGAVGGVVLGTMNMGANLDSVERGGNIIIELE  
EEQYHAVNGKKSEGKLTDKVLMVLSVAYFPVIARFASANALDRGVFGLLIDAPTDADNQDHGREMSI  
PAPTVHAETAPLYAESDIDRIAWIAPLHLLGTLDVLLFEPDFQGFISMMIEASLEIMETAEVMEDYHVL  
EKGARPPGFRVVLKGLHIRLLAAVGTLLVVGSAGRTEVTAYIQGRAVPISLRKQTFPAPSSCNVVDI  
FSTLLRPPERSAVEMLILETVAEL-  
LEVTRGSNDKLERMQVLLPGLDMAELLELLAAADDFADIVTIGAAITAILSVAEEAVVREMLLTKEAIAI  
TALALAMALLMLTGDGTGLTQKEAAREAQMKDLIQAGAVLQLHAADAMVLAATADKVRLSTDEGTT  
SAFASLNLATVSDGFYVLSSAVLQMSSDLMMIVSVARVLADKESKNALVVRHPEQVKTOPTAEGSP  
GMVLQTLTGCIPLAIKPEEVELLWTLVAALWKAKAHLASATRPHNERVLILLALGLIVVLLQSEGGG  
MGGG-  
ATAAAKVLAASFILTLKAAVGDEVKRVTRRVMDLSSRLGRPEEAVNPEFKGEELDQTKYEAENVEVDC  
METVRRFVDIPFLVSIRTQHNESEDGRARLVLDVTRVRFIDL-  
VTKKSDVILVERVETDGIARQMAKDMQSLHPEAAALGKVSALQHFIALGDAHISNYVTAATHSVLG  
MLLLVLFIQQVRVSKVWWPTRREVTMVFIMAALAAFFVIGLGINIVFMVGGISPLQITTLVLGEGVMA  
VRQSTSTFPAES-  
VTILQNTYADLICAGRVTKADIESSLHIVVGARVARGTWYVIYHYEITQAQGPAGIMQRAFRQATLSQ  
SLIDGRMDVKIKVVTSDRYA-  
TYEIKGGQHRKGTRYNRVKVGHNIPVEVLARIKLAFGPPNLVLVKTFGAVVQKRFAQPLTHMRHGAV  
TIGPMEVSSPYIKSKKARHAPGDSVVDIKPDNVVRSVAVVPELIWARENEDQSAVHEKYVKTTTHKIAA  
KRSRAVDKAQYDKRNQVHLSFIGLAVKVLPEQAIVEASAGTLLPTESEAVTENLKGVAATIRLDPMEKA  
LIAYIKRMRPQLNLQGKTDNKIVKCLNNNLDDVEWGKLGRRIKIPITIKSVYDVEHTRATELVKLMPYK  
DDVEGRKSQFAEK--  
ALFEPLKAFMMMFGFIARAVYALSLRVVRRRTILLVKTIVVNANTVLSAIIIGVSIRLRHKSTNVAETKH  
HIKTIEARARMTLAGAPSVKLNLRPGRVGKKGGRIKGYMPYKNYNIFDGLASGRRRAKVKEKAKKKVD  
KTIAVDGIRTRQQGGRLPKADLSNALSNTDVDVEVGENEQUEESNPRANAEMGQIFAADARVYSLV  
AALIGHALLAVLAICSILGIGKAHVMLAVKLKINAGIEMHSAA-VAAAVAAA-  
YSQPAGEATAIADVSEAYLGALAITESSLDVCRLRRRQLG-  
LKKTKKEAYMSLTCFAGKGDVKIIEATQTQAVEIVATRTAERHGIKAKGTYGKERAMMQITPTKPVKV  
WVPVFNEDELLAPVRAFAETNGDGVTVVKLTDDVKITMFEKGVASLAVTGKVTTLVYTVLEKVTELSK  
DIIYEQRAKAHYGRGRLRSHVVTHTKQKRHLMMKRTVVADPSMDAARLTDGEVSVVTGATMAFV  
MSEQDAV--  
GDVDMHFHEEPRREAALGIAGPETFLATDQPRLLALLFLREYLIHIVDIDTVGNFSNAATYDILRAMQ  
NKLDRKLSADIAKVRMCLSDDVADMGVTDAAARRDTAGDSILSAYWINGVTATSDIILLVANLECKT  
APENIDCAVRLFYQRITLQAKERDGDVSVRLVPAQNQIEAAEGTVIYTIKGNPSTAQMMLNIEAISRSI  
VKSLAVQLFQVDLFLNDTWIATLLRAEDVVYVDAREGREAVDHHVVERDTELELAPQKDIISRKIRIFTP  
AAPSAVVIWDPDIDREDKADAQGTILMIYGPDLQDISCFTDIGSEPKIESLAAWDEKEKYVVHRDDIPE  
DI-  
TLVGKSSKVNKEFGIPDVAVCAPAKPGVTESIDRQEPKAGTCGEVANLPYPQDSLNVNRVSSANVQKNI  
SMVLGGHPVGEMGISRDVERHLETNMCEIFVDKDDVDVALDFFKLSLTPLRVGLDKPNAKVQIDGKE

SRKLMAVKDGEAKLQRHPKVSEESGTR-KADDKAKLPDDALIFDGVQYGDLSFTATDLPEGRV-  
VTPVFNNVKAQLAIDKVMLKTFHVVTLSFSNDKGEEHLIKLRLNALKKSTRHYEMLLKIRDTECAQSPH  
AIPVGKILKIDSLQITICKAHYTAIEPLLAEDLTALGVMGDQGLLHVVPRLMILAVLHLLGLDARGQLST  
WSLQEAAVVTDQTMGLAIRDRWSF-AISEVVGNTFFARSKDDDTEERLHARNPI-MIL-YGKEGML-  
ISPSGLKLASTQPSDDEHGNKNKLILSTERLQDQMSYHILAILLVFVDEMILAYGSGEEPLKFLVAEQAV  
TGRANPQLVCLTRRTFPLDLQRDAVFVLVLEDTTMKNLSHKKMHMNLVLVPKPSWVENVSTKILISD  
QAIASYAEDAGAHTQPSESALAIITNRVIPIVLVLSQKPAAPSKTMFLEALNLYDEITATVAKRPKRYFIF  
EGDVISVLNTLDAAVILGMQRPQPDRLRRAITAIRLAIALRGSGVLAQLEGGVINFSRAVSLAAKVY  
DALNLLARAAISLPALDFVRNHKTSTKRDRPYKGHTKFLHKAEEEEKALVAEGVDTLS

>GCA\_000382265

AVIRPVTMKTYAPVLMIAQSQVATVSGAGSPSLRAKTVYAKSGLQRKSETKWVVKDFYY-  
GVVKLGNLVQLVSISVDNRAVCTVAQLVEQEVVHGMVALDAVKKKIALEEITGMTAEDPAKVVDY  
AGELDLRKFRDADDRADMLPILLGLTLKIRFDPHQPLVHDLVPVVFVV-  
GIMVQRTGIEVDECAISTAISDVPDIVVSPIDLAAVSGDKMAYIDQESAVSAAKADIAL--  
LALES AVL VVG I- PLLIPV-FAADADV-MSFANRSRTLKTIVNLAVSYPEIKRA-ID-GIAASL-  
MEASQAALAEKRGTAEQIRIVKRMQRSAGLADDPVLLEDAAEGNSNWAGQIYDDPLSGSSED  
SAGNIVFAANKRQNFQRSITFLRKVEISDQAAAPLMRGVKHNAKSRSARKVDDTIAALNFPNVPEGIA  
IRAVAGKPVDLLHDATEGEEILMIIVRWVHTWKTAIHIALFPRAGDIVGLIELGGIGAVGRKEGLLRHH  
KMNGALIEQRRIVEKLT LRLRAALKQKIGAEQIIIFVVKVAGDLVAKAKIQM---

SVGAVVAIQGETIYVRRHRQT VIADEDATVEVLRGVAEGPADAQALLRIRVDHVLVKSLLIPE-  
PVLVESVSIREGVGKALQIIQLDVYLLRDMGTGEETLAKSRREMIREILQVDPITGVRLAFGILRERLVKG  
GTMKELGTL---

LAILDQITEPRMANLPDGVCRTFINAGPRAAVGMIFLLDDAGKIYTIDGDLRELTKSIKSLIGLVDAAKP  
KIMSAAYAAARLKVRYADVTVLVSDANLYAYAEERRELLRMVPVYITNAAARRQLIIFALSIRGGHRRRA  
RAAIGVLIAAAILESQAERGAVNHAEPVLLDDGEIVGSEMMISRQAALDLKQIIKTDVIVIFPEFQEKM  
VVSLKFFCTDVAIFVIALICTVGAMLSREPSSAQEDGAGFQKRIRAHSVLFALVATFDRRLRSA---  
NLFLALGLAPPRYGVLYTEQPKRKQMPSEPDKKEVDGFDLVHAIKEDTASNHELDMPPEAMALAVEAD  
ATINVTAGVLAMTGDMAAMEKVDSKRKMALAVEKWTISAESIVDIIISGAHPFRALN-  
IETADVSAGLPRKSIWFLYLPGANNAEMEEELDGAGASTAEAMNKQTGILLVNPVLVVIQDSNTA  
ALIANGGLEEWGTMAYKKHYALAARMRLHMRTID-----

QMEPNKQKAEIKITVKLEGDTRFRQLATEGVKEQMP-LHALNPDAFV-  
LPVLVTPAVGRVAADEQVLGARVPCDASL-

RELQKSMMSGDALPISGIRLLGMRAARAMVDEDIMVAGKVAA-  
LLVILALETITHLVLRNDSEATLPWRLSVAERLEADMKRASGYAARPFKSKPSLCNTQAHAKIADPIQEI  
AAGYVAKDERFVFPVEGIPIQLILASPHSRVGSAKRAGLGHLEMAKELHAKAVIMVLNEPETNTDGLL  
NYLTTHQPTDLLFEDCLDVVIDMRRMNVV-----  
VQLNTV-

HIVIPGARELG DreimaaaPSGLVQVERVDDRTGRERTLMWMyGAMEELWLLSVTYADWVVNCAI  
GAILLHVYAQVINRAFLDRLQLAGWPRDASRWWNTWQLWLNKDGFFGYEAAFRAVLAVLSADLD  
DYEMSDVEGVGRHLSRQQLRVGYRIREQVAFEQLDPRTDILLQSRTLSVIRHALAMVAILVRDIVVE  
FTLVAKEDVAMGHVECVLADSFDTAKDADIGPVGIRTPDTV LGDGTVFNEAVLGKIDFANTVADF  
RYKMLADGGRDLGVSWITLQNMLYARIWLPPAQAALKNLVPIAFFLGHTELNLAIFPALWAGISKARA  
QKLMAGALIEKILAKVAAFADPEATTHQSKKAPHFKYYGEEVDPVYLAYILEIFALVATQVTVSDRLLTD  
HYVLNLKI-RGFTSLLWLSAQIADKGPAATVITVDTIMGLGALVFIILL-RTSVLVETLYYRYVYV-

MLGYQAAKDVADADPEHFLSLAHASRDVEYIEIIPAFFYYFKTAT-  
FEPFNTALAREFFGLFEERLRIVEVLAVPPDRVLELVQFVALAGTLPTSADAAPGVIACGFCEPNAAGVL  
EADQDWNLHRSMGITLAFYDARESVKGWFDKGLHKDVAATGLREAGALTTPFHA EVTAKQCVPAV  
HRVLDLGDVEAALIEISSAVLVADEEQTLADKPTTRENSVGAVGGVVLAGTMNMGANLDSVERGGNI  
IIELEEEHYSAVNGKKADGKLTDKVLMVLSEAYFPVLRRMASANALDKGRFGLLIDAPDDADNQDHG  
RSLTIPAPTVHSESASLFAETEIERIAWIAPIHLLGTDAVLGFEPDQYSFISMMIDASLNIMKTAEVLDDY  
HVLEKGSRRPPSFRILIKGLHIRLLAGICTIIVVGSAGRAEVTAYIQG-  
AVPITLNKQTFPLPAFAASSCHADIFSTMLRPPERSTIQTILLETVTEL-  
LEVTRLENDKLERMETLLPGLDIAELLGLLAAAADFTAIVTIDRAITAILSVAEEAVVLEREMLLTAEIAVT  
ALALALALLMLTKDQGLHQKDHAREAQMKELIQGGVVLQVKAERMMLASTADKVRLDTDEGTT  
AFASLNLATVSDGFYVLSSSVLQMSSDLMMIIVARVLADKETKNALVVRHPEQVKQTQGTAEAGSPG  
MVLQTLTGAIPLAIKPEAVEELLWTLVAALWKVKAHLANAARPHQERVILILALSITVLLQSEGGGM  
GGG--  
NPPAKMLAAFSILTIIKAKAGDEVKVRTRVMDLNSRLGRPEESVNPEFRGAELEQSKYEADNVEVDTV  
ETIRRFVDIPFLVSIRTQHNESEDRGARMVLDVTRIRFIDL-  
VTCKSEIILAAARETDGIIAREMGKDLAALHPQAAALQHFIAVQDAHISNYVTADIHAVLGML  
LLVLFIQEVVRVAKVWVPTTRREVTMVFI LAALAIFFLVIGLVQIVFMLSISWNALTIVLGEGIMVVRQT  
STFPEDS-  
IGILQNTFAELICSGRVAKADIENSLHIVVAGRVARGTWYVIYLYEINQAQGGQSGIMQRAFRQMTLSQ  
SLIDGRMEVKIKVVTSDRYA-  
TYEIKGGQHRKGTRYNRVKVGHNIPVQVLPRMKMAFTPPNLVLVKTFGAVVQKRFAQALTHIRHGA  
VTIGPMEVSSPYIQNKARHAPGDAVVDLKP DNIVRSVAVVPELIWARENEDQGAVHDKYVKTT HKL  
AAKRKKAVDKAQYDHRNQVELSFIGLAVKVLPEQA-----  
-----  
RMRPQLNLAGKQDKKIVKCLNNNLDDEYGKLGRRKIKPLTIKSVYDVESRRATELVKLMPYKDDVES  
RKSQFAEK--  
ALFEPLKAFMMMFGFIARAVYALYLRVIRRTILLAKTKVVVNADSVLSAIKIIGVSIRLRHKSTNVAETNH  
HIKTIEKRARMTLAGAGKVKNLSPGKIGMKGGRIKGYMPYKNFNIFDGLASGRRRAKVQDLAKLKDVD  
KTISVDGIRQKQGGRTPKAQLSNAI-  
NTRVGVDIVGENEQUEESNPRANAEMGQIFAAIDARVFSHVGALIGHALEAVLAVVAIWGIGRAHSL  
AVRLHINAGIEVHSA-VPRAVAAA-  
FAENAGEASLVADVSEGD LGALAVTAMSVDVCRLRRRSLAE-----  
-----  
RHGIRAKGTYGKERAMMQILPTKPVKIWVPVFVSEEELLAPIRAFAETQGDGVTVVKLTDDIKVTMFEK  
AVASLAVTGKATTVVYTVLEKVTLMKDIIYTQRAKAHYGRGRLRSHVTTTKQRRHLSMIKRTVVAD  
PSMEAARLTDGEVSVITGATMAFVMSEQEAV--  
GDVDLHFHEEPRREVELGIGGPETFLTTEQPRLLAVLTIREYLLHIVEIGTTNGFSDAATYDVL RAMVYK  
LDRKLSADIATRMVLVDDLKMGVTEVAARREAAGDKILSSYWINGVTANADIVLLVANLECPV  
ENINCAIRLFYQRITLQAKERGGDVSAVVAADKQIEAAEGTVIYTIKGTKPTGTAQMKL TIEGISRSVVK  
SFAVQLFQIDTFMDDTWIATWLR AADDVVFAAEDGKEAVDHVVERDTAVEFAPQKNIVSRKIRIYT  
PAAPS AVVIWDPAIDREDKAEAQGTILKIYGP NLQDINCFTDIGAEPKIESLKAWDEKEKYVHRDDIP  
DDIDTLVGKSSRVNKEFAIPDVAVCAPSKPGVTESIDRGE PKAGTCGEVANMAYPQESLVNAVSSAN  
VQKNISMLAGHPVGEMGISREIERHLETNMCEIFVDKPDVDVALDFYTLVLT VLRVGLDPPNARVQI  
DGKESRKLMAIQDGDAAALQRHPKVSAAATGTGLGAGVKARMPDDALILDGVVHGALSFTATDLPAGR

V-

VTPVFNTVKAQLKIDKVLLKSFHVVTLSFSNNKGEEHLVKLRLNALKKNTRHYEMLLKIRETECAESPHA  
ISVGKVLKIDKLLQTICVAHYKAIEPLLADDLTALGVMGRQGLLHVVPRLMILAVLHLI-  
ISCAMILPRWRLQQKAIITDQTMGLAVRARAWSY-AISEVVGNTFFARTKDDDETEQRIHARNPV-  
VLL-LGKFVMI-  
ISPSGLGLKSTAATDQDLGNAEPLILSPERLQDEMGYYVIAILLVFVDQVILAYGSGEAPIKFLVADQAV  
TGKQNPGMVTLTRRTFPLELQRDATFVMVFEDSTMKNLSHKKMHMNLVLIKSGWLNVNSTKILISD  
QAIASYAEDAGAHTQPSESALAVITSRVMAPIVLVVSQKPTAPSKSLFLEALALYDEVTATVLNPKPKYF  
IFEGDVSVLGGGLDSAVLLGMQRPQPDAMRRAIVAAAIRLAIAALASGIVTRLEEGLINFSRAVSFTR-  
AYL-----AFRVRNHVDVSTKRSPYKAHTKFLHKADVDSLIAEGVDTLA  
>GCA\_000423645  
AVVKPVTINVYAPVLMIRQSQVATVSGAGSPSLRAKTVYAKSGLQRKVSTKWVAKPLYF-  
GVLKMGKIVQLVSISVDARTVCTVAQVVEQEVVHGLVALDAVKRKIALEEIDGMTTEDPAKVTEFEE  
EIDLRRFRDAEDRADMLPVLLGLTLKIAFDHPQPVVHDLPIPVVFEV-  
GIMADRGGIEVDDCAISTALSDVDPIEYVSPIDLEAVAGDAMAFIDQEAAISAAKQAIIELEALESTVL  
VVGKPLLLPV-FGDDAGV-MSFAARSRTLASIVDLAVSADEQTRARIE-GIAAEM-  
MKRIQAAALAERRGTAEIRIVKRMQRAAGLADDPDLVMLGDAAEGNSAWAGQIYDDPISGSSED  
SAGNIVYAANKRQSLQRSITHLRKVEISDKATAPLMRGVKHNSKRSARKVDDAIAVLNFANVPEGIAI  
RAEAGTPADTLLHDATERILLIVIRWRVTWKTAVVIIIITAGDIVGLIELGGIGAVGKPDGLLRHHKL  
NGSLIEQRPIVEKLTLLRLRASLKQKLGEQIIIFVVRVQGDLVADAKVQMG-  
GTLGAVVAVQADVIFVRRHKQTLVTDQEATV-ILKGVAEGPADAEALLRIRVEHTLVELSVLLIPR-  
PVLCDTVSIREGVGKALQIIQLDVYLLRDMGTGEETLAESVSRELVRDILMIDTVTGVRLAYGKVQERM  
GRKLTLEIEAL---  
LSILDGVTEPRMENLAEGVRRCFQAGPRAAVGMLFLLDDAGKLYEIDGELREITKTVKSMIGLVDAK  
APKVL SAGYATARKIRFADCEVLQAEADLHPYKEERRELMRMVPVYIIEAKRRQLVLFALSLRGGHR  
RAGAALDVLIAAAIESQAVKDAVHHAEPRIILDDAEIVGTAIMISRQAALKLKQVRVVDVVIFPEFQE  
KMVVSRLFFCTEVAIFVIALIVTVGDMLSRNPDHAQEDGAGFQKRIRGHSMLFALAATFERRNCGDA-  
RADLFLGLGMAPPRYGILYTNQPKKKQMPSEPDAERVDGFELVHAIKADTRKNHELEMPEAMALAVE  
-DATINLSAGVLATKGGMAAVERVDSKRKLSLAAEKWNISKLGHLHDLLISGAAPVRAAG-  
IEQADISAALAKAV--  
LYLRGASNAQLEEEKLGGAGNSSANIAEDRQRQILLVHPVLVVIQDSNTAGLIANGGIDEWGTMAFK  
KHYAFAARMRLHMRTIN-----EMEPNKQKSEIKTVKLEGDTRFRQLATDGVKEQMP-  
LHALNPDAFVLRVAVSPAVGRVAASEALLGAAPVPCGASL-  
RELQKSQKGSALPISGIRLLPMRAARAMIDEDIMVAGKVAA-  
LLKILALETIAALVLRNDSEATLPWRLSVAERLEADTKRASGYAARPFASKPSLCHTQAHSRVADPIETIA  
AGYVAAEKRFVFPVEEIQIVLANPHSRVGSAKRAGEGHLHEMAKELVAKAVLMLQNEPETNTEGLL  
NYLTNNQPTDLLFEDCLDVIIDMRRMSVV-----  
IQLNTV-  
HVLIPGTRDIGDRGIMAAAADSGLVQVEQVDERTGRERTLMWWMYGAMEDLWLLSVRYADWVPQC  
PIGAILHVYAQKINRAFLRLRLQLEGWPREAARWWNTWQLWLNKDGFFGYDAAFRAAKQVLKTAL  
LDYDMSDVEAVGRMQSRQELRVGYRIRQQVSFARLDPRTDILLQAQTRLSVIRHALQVVAILILREVV  
GEFTLVVAKEDVAMGHVECVLAESFDFTEKNAHIGPVGLRDPETVLGDGTVLNEAVLGKIDLANTIAD  
YRYLVIVDGGRELGVSWLSL-NMLYPRIWLPPAQAALKNLEPICFFLSHPELDLESBGDSFE-  
ISKTRADQLMASALVEEILEDVARFAEPEATTHQSNKERHFKYEGEVDPVHLAYILSMFALVATQVTIS

DRLLKDRYVLNLRV-  
RGFTSLLWVAANFGEKGPSATVITVGTIAGLGALVLFILLMRDRVIVETLFYRYVY--  
MRGYEAAKDVAADADPEHFLELAAVSRDAEWIEIIPAFFYYFRTAG-  
FEPFNTAVAKEFFGLFEERLRVIDVLAVPPDRVEALVEFVALAGTLPTS AEALTGVIAAGLCEPNAAAVL  
EADRDWNLHRTMGITLAFFKAQVSVKGWFDKGLHKEVAETGLTEAGGFTTTNLCEVEARKCVPALH  
RQIDLGEIEAGLIEIDSAVTVADEEQLADRPTTREQTVGAVGGVVLAGTMKMGASLEQVERSNNIIEL  
EEEQYHAVNGKKGDGKLTGDVLMVISKAYFPVLRRAASATALNQGVFDLLISAPTDADNRDHGREM  
SIPAPSVHTETAALYAEAEIDRIAWIAPLHMLGTLDAVLLFEPDQYSFISMMIEASLDIMETAEV--  
DYHVLERGGRPPSFRVILIKGLHIRLMAAIGTIIVVGSAGRAEVTAYIQGRAVPITLNKHTYLPAPAPSSC  
HVVDIFSTMLRPPPERSTVQTLILETIAEL-  
LEVTRLENDKLERLLMLPLGLDMAEMLGLRATADDFASIVTIDAAITAILSVAAEAVVLREMLLSLAEIAV  
TALAVAMALLMLTGDGLTQRETARERQLKELIQGGVVLQVHALDLMVLAATADKVRLETDEGTTS  
AFASLNLATVSDGFYVMSSAVLQLSPDLMMIVSVARVLADKETKNALVVRHPEQVKTQPTYAEGSPG  
MVLQTLTKCIPPLAIKPD AVELLWTLVAALWRVKAHLAEAMRPVRERILILLALALIVVLIQSEGGMG  
GGGVSAARVLA AFSLTIKAAAGDEVKVARVMDLNGRLGRPEESVNPEFRGEELEQTKYEAENVE  
VDCMETIRRFVDIPFLVSIRTQHNESED RGARMVLDVTRVRFDL-  
VTKRSEIILAA RVETDGIISRDMAKDLQALHPELAALGKIAALEHFISLTDGHISNYVTADIH SVLGMLLL  
VLFIQQVRVAKVWVPTRRREVTMV FIMAALALFFLVIGL--  
NLVFM LGGISPLQITTLVLGEGVMAVRQTSTFPEDS-  
VTILQNTYADLIAAGRVAKADIEASLHIVVGARVARGTWYVIYHYEITQAQGEAGILQRAFRQATLSKS  
LIDGRLEV KIKVVTSDRYA-  
TYEIKGGQHRKGTRYNRVKVGHNIPVEILPRLKLA FHPPNLVLVKTFGAVVQKRFAQPLTHMRHGAVT  
IGPMEVSTPYIKNKS SRHAPGDSVVGKPDNIVRSVAVPELIWARENEDNSAVHDKYVKTTHKVAA  
SRNRAVDKAQYDKRNQVHLSFIGLAVKVLDPQA-----  
---  
RMRPQLNLAGQTDKKIVKCLNNDLDDVEYGKLGRRKIKPLTIKSVYDVEHRRATELVKLMPYKDDVES  
RKSQFAEK--ALFEPLKAFMMLFGFIARAVYALYLRVVRTILLVKTKIVVNAKSVLS-  
IKIIGVSIRLRHKQTNIADTKHYIKTIEARARMTLAGAPAVKLNLRDGRVGTGGRIKGYMPYNGYNVF  
DGLDSGRRRAKVRELAKLKKVDKTISVDGIRTRQQGGRI PQADLSNAI-  
NTRVGVDIVGENKQAASNPRANAEMGQIFAAIDARVYHLVAALIGHALAA-  
LARCAIQGIGQAHALLAMKLEINAGIEFHSAA-VETAVAAA-  
FAEPAGEAAVIADVSEAYLGDLSDASLDVCRMRRRRRLA-----  
-----  
RHGIHAKGTYGKERAMMQITPTKPVKVVVPIFVDESELLAPIRAVAETNGDGVTVVVLTKDVKITMFE  
KAVASLAVAGKATTIVYTVLEKVTELMKEIIEQRSKTHYGRGLRSHVVTNTKSKRHLSMMRRTVVAD  
PRMDAARLTDGEVTITGATMAFVMSEQDAV--  
GDVRMHFHEEPREAGLGIAGPETFLATEQPRLLALLFLRAYLIHLVDIGTVGGYAEATIFDILRAMYN  
RLDRKLAADIAKTRMVLHDDVQNMGVRAESPRRETAGDSILSAYWINGVTANADIILLVANLETTMV  
PENINCAVRLFYQRVTLQAKERDGDVSVHLVPAQNQIEAAEGTEIYTIKGATTGTTQMRLTIEGISRSIV  
KSLAVQLFQVALFINDTWIDTLLRAANDVVYVDAREGKEAIDHVVERDTELEMAPQKDIVRRKIRIYTP  
AAPSAVVIWDAAIDRSKADAQGTILKVYGPDLQDMACFTDIGAEPKIESLSKWDEKERYVVHRDDIP  
PDI-  
TMVGKSARVNKEFGIPDVAVCAPSKPGVTESIDRGE PKAGSCGEVANLPYPQESLVNRVSSANVQKN  
ISMVLGGHPVGEMGISRAIERHLETNMCEIFVDSPNVDVALDFYTIELTPLRVGLDSPNAKVEISGKESR

KLMAVL DGEADLQRHPKVS LAAGQVGKVG ERARLPDDALIRDGVPHGDISFTATDLPEGRV-  
VTPVVNNVKAQLEIDKVM MKTFHVVTLSFSSDKGDEHLIKRLRNALKKSTRHYEMLLKIRDTECAQSP  
HAIPVGKILKIESLLQTICQAHYTEIEPLLSDDL TALGVMGDQGLLHIVPRLMILAVLRMWGLEARALAA  
HWDVQAQAI VTDQTMGMPLRARRWGY-AISEVVGNTFFARTREDDTETRLHARNPI-MIL-  
YGKEG LL-  
ISPSGLRLDSTTETAD DHGNNDQLILSKEHLQDAMEYYILRVLLVFVDEVIVGWGSGDEPLKFLVADQ  
AVTGRANPGLVCLTRRTFPLDLQRDAVFVLVFEDCTMKNLSHKKMHMNLVLIKSGWVVNVSTKILIS  
DQAISSYAEDAGAHTQPS ESALAVITSRVIAPIVLVVSQKPAAPSKTMFLEALSLYDEITCTILKEPKKYYV  
FEADVISVLNSLDAAVILGMQRPQPDRMRRAVVAE AIRLAIALQGSGVLASLEGGAINFSRAVSLAAG  
VYPSLALVPHAPID-PSIEFRVRNHKTSSKRDRPYKGHTKFLHKA EQEKGVLVADGVDTIA  
>GCA\_000442275  
AVIKPVTQNTYAPVLMIRQTQVATVSGAGSPSLRAKTVYAKSALQRKTETKWVAKPLY-  
GVLKMG NIVQLVSI SVDNRSVCTVAQLVEQEVVHGIVALEAVKRKIALEEISGMTAEDPAKV VHYDE  
EIQLKRLRDIEDRADMLPVLFGLTLGIKFD PHEPLVHDL PAPVIYEV-  
GVMAEKG GIEVDDCAISTALSDVDPIEYVSPIDLEAVKGEAMAYIDQEAAVSAKETAELEELALESTVL  
VVKINPLILVTPFAKAADT-MSFANRSRTLESIVDLAVASYELTRA-IS-DFASEM-  
MARAKAEALSDKRGTAEEIRIVKRMQKSSGLADDPDLVILEDAVEGNSSWAGQIYDDPISGSSESDSA  
GNIVYAANKRQTTERSITFLRNVEISDSADAPLMRGVKHNAKSRSSRKLDDAVAELNFPNVPEGIALR  
AAANKPKD TLLHDAAEGERILLVIVRWHVTWKTAIIVIFILEAGNVAGLIDMGGIAAVGRP DGLLRHH  
KLNGSLIEQRPIIEKMTLRLRASLRQKLGDQIIIFVVKVAGDLVAAAKVQM---  
GVGAVVAIQGVTIFVRRHRQTLITDAESTV-ILSGVAEGPADAEALLRIRVTHLVDISVLLIPE-  
PVLVEGVSIREGVGKALQIIQLDVYLLRDMGTGEETLAESKSRELIREVLSIDPITSVRLAFGKLKERATKQ  
MSVKDIDTLF--  
IAIMVAITEPRMENLAEGVCRNFIRAGPRAAVGMLFILLDDDGKLYTIDGELRELTKSIKSMISLVDAKAP  
KVL SAVYATARLKVRFADCEVLNAEADLYPYKDERQELLRMVPVYIILEAKRRSLIVFALS LKGGHRRAA  
AALEVLIAAAILESQAERGGVDHAAPAIVLSEAE LVGSEIMISRQA ALEIKLRFKIDVIVIFPEFQEKMVVS  
LRFCTEVAIFVIALITTVGEMLSREPSSAQESGAGFQK---AHSVLFALAVCFERSNL RDA--  
PDLFLALGLTDPKYGIFYVNQPKKKQMPSEPKDRTDGFELVHAIKADSAKNHELEMPEAMALAVE-  
NESINLSAGVLALSAEMVDVEKVDSKRKMALAVEKWTIAKVPIVDVKLSGAAPVRAMD-  
VEQADVTAALSKKQLNELFLPGATNKDLEEDKLGGAGASTADAAADRQERILVVR AVLVIQDSNTA  
GLISNGGVEEWGTMAYKKHYAFAARMRLHMRTID-----  
MEPNKQKAEKIKTVKLDGDTRFRLAVGGVKEQMP-LHALNP DFAV-  
LAVLVTPAVGRVAATAELVGGQVPCDASL-  
NELQKSQRGDALPISAMRILGMRAARGMIEEDIMVAGKIPASLLVLSALETIMKIVLLNDSEATVPWRL  
SVAERLEADTKRAGGFAARPFNSKPSLCKIQAHARVADPIQEIAAGYVALEEKVFPVEGIAIQ LILASPH  
SRVGGAKRSGEGHLEMAKELFAKAVLMARNEPGTDEGLLRYLT TQPTDLLLEESL DIVIDLRRMQ  
VV-----VQLTTV-  
HVVPGIRDVGDYEIMAAAAPSGLVQIERVDDRTGRERTSMW MYGSMEELWLMSAKWADWVIDT  
PIGA IILAVYAQDINRAFSYKRLQLDGPPEASRWWNTWQLWLNKDGFFGYEAAFRASKQVLKADL  
LDYQMKDVEGVGRMQSRQELRVGYRIREQV VHEQLDPRTDILLQSRTL SMLRHALKVVAILV LREV  
VTEFTLVVAQEDVAMGHVECVLADSFEFTAKDADVGPVGLRTPDEIFGDGT VFKDAVLGKVDLANTV  
AEFRYLVIIDGGRELGV EWTLENMLYARIWLPPAPAAL KDLLPIKFFLSHPELDLDWQLHWFNGISKA  
RAQRLMASALVEGILDGVARFADPEATTHQSAKEKHFKYYGEEVDPVYLAYILSLFALVATQVT VSDRL  
LKDRYVLNLKI-RSLTSLWVAANLGDKGPTSTVITLGTIAGLGALVFIILL-RDLVLVETLYRYVY--



MLGYQAAKD VADADPEHLLQLAAASRDVEWIEIIPAFFYYFKTAG-  
FEPFNTAVAREFFGLFEERLKVVVDLAVPPDRVEALVEFVALAGTLKTSADALPGIIACGLTEPNAAAVL  
EADQDWNLHRAMGITLAFFEARES VKGYFDKGLHKAVAATGLKEAGALSDPFHCKMTAKQCVPVV  
HRLVDLGEIEAALIEIDSAVEVADEEQTLADQPTRDKSVGAVGGVILAGTMAMGASLDSVERGGNIII  
ELEEQQYHAVNAKKADGKMIDKVL MVVSAAYFPVIQRCSSANALDRGVFNLLIDAPSDADNLDHGR  
KLSIPAPTVH-  
ETALLYAEDEIDRIAWVAPLHLLGTIPAVLLFEPDQYSFISMMIDASLEITETAEVLLDDYHVLETGSRPPA  
FRII--  
KGLHIRLMSAIGTIIVVGSAGRDEITAYIETGAVPISLKKETFLPAFAASSCHADIFSTMLRPPERSVMT  
MILETVAEL-LEVTRFENDKLERM-  
ILLPGLDVAELLELVAAADFSTIVTIDAAITAILSVAAEAVVLRELLTLAEIAITALALAMALLMLTRDQ  
GLTQKERARETQM KELIQGGVVLQVKVADSMVLASTADKVR LNTDEGTTSAFASLN LATVSDGFYVL  
SSAVLQMSADLMMIIEVARVLADKETKNALVVRDPEQVK TQSTYAEGSPGMVLQTLTGCVPLAVKP  
EEVELLWTLVKALWRVKAHLASGARPRRERVLVLIALCLIIVLIQSEGGGMGGG-  
ASPAAKLFGAFSILTIIKAAVGDVVRKVARRVMDLNSRLGKPEEAVTPEFRGAEELEQTKYEAENVEVDT  
METIRRFVDIPFLVSTRTQHNESEDRGSRMVLDVTRVRFIDL-  
VTKRSEIILVERVETDGIAREMAGDLQALQPEAAALGKIAALEHYISLVD AHVSNYVTAEIHSVLGMLLL  
VLFIQQVRVAKVWVPTREVTMVFIMATIAIFFLVIGLSVQIVFVLGGISPQQITTLVLGEGVVAVRQTS  
TFPAEA-  
VTIMQNTYADLICAGRVTKADIEASLHIVVGARVARGTWYVIYHYEISQAQAPAGIMQRAFRQATLS  
NSLIDGRMEVKIKVVTSDRYAQTYEIKGGQHRKGT KYNRVKVGHNIPVEVLPRMKMAFGPPNLILVKT  
FGAVVQKRFAQPLTHVRHGAVTIGPMEVASPYIVMKKARHAPGDSAVDLKPELIVRSVAVVPELIWA  
REHEDNSAVHDKYVTVTHKIAAKRNTAVDKAQYDKRNQCELSFIGLAVKVLPEKA-----  
-----  
RMRPQLNLQGKADKKIVKCLNNNLD DVEYGKLGRRKIKPLTIKSVYDVEHERATELVKLMPYKDDVES  
RKSQFAEK--  
AIFEPLKAFMMLFGFIARAIYALSLRVIRRTILLAKTKIVVNANTVLSAIIIGVSIRLRHKSTNIADTNHHIK  
TIEKRARMTLASAPSVKLHLRPGKVGKGGRIKGYMPYKNFNIFDKLEAGRRAKVKELAKLKKVDKTIA  
VEGIRVKQQGGRVPQAQLSNALANTRVGVDIVGENEQEDSNPRANAEMGQIFAAIDARVYHLVGA  
LLGHALLAVLAIAAIWGISKAHALLAVKLRVNAGIEFHSA A-VPTAVAAA-YAQPAGEA-  
AIADVAEYPLGDLGVTDATLDVCQRPRKRLSE-----  
RHGIRAKGTYGKERAMMQILPTKPVKVWVPMFVNDD ELLAPIRQFAETNGDGVTVVKLT KDIKVTMF  
EKAVASLAVAGKVTSVVYTVLEKVT ELMKDIIYEQRAKAHYGRGRLRSHVVT HSKQKRHLSMIRRSV  
ADPSMDASRLVNGEVSVITGATMAFVMSEQDAV--  
GDVDMHYHEEPRREAQLGIAGPETFLSTEQPRLLCLVFLREYLIHIVIDITVGGFSDAATIYDILRAMQR  
KLDRRLAAEIAKVRMVLADDVAGMGVTEVA AKRDTAGDEILSAYFINGVTANADIILLVANLECKCAP  
ENIHCAIRLFYQRITLQAKERGGDVSAIVPAQNQIEAAEGTVIYSIKGKTPSTTQM KLNIEAISRSIVKSL  
AVQLFQVDTFLADTWIDTLLRAAKVVFVDAKEGKEAVDHVVERDTEIELAPQKDII RRKIRIYTPAAPS  
AVVIWDPAIERE-  
KADAQGTILKIYGPDLQDISCFTDIGAEPKIESL KSWDEKEKYVVHRDDIPEDIDTLVGKSSHVNKEFGIP  
DVEVCAPAKPGVTESIDRGEPKAGSCGEVANLPYPQESMVNAVSSANVQKNISMVLGGHPVGEMGI  
SRAIERHLETNMCEIFVDKDDVDVALDFYIIQLTTLRVGIDPPNAKVEIEGKESRKLMAVRDGAASLQR  
HPKVSEAAGTRIGAGRKARLPDDALILDGVLHGDLKFTATDLPEGRV-  
VTPVFNDVKAQLKIDKVLKSFNVVTL SFSNNKGEDHLIKLRNLNALKKNTRHYEMLLKIRETECAESPHAI

SVGKILKIDSLLQTICTAHYTEIEPLLAEDLTVLGVLDQGLLHVPRMLAVLHLR-  
VGIAMFVPHWGLQQRAIVTDDTMGLRVRMRDWSY-TVSEVVGNTFFARTKDDDTEQRLHARNPI-  
MIL-YGKEGML-  
ISPSGLGLKSTPESDMEEDNDKEVILSVEKLQDAMEYYVLQLLLVFIDEIILAYGSGTEPLKFLVADQAIT  
GRDNPQLVALTRRTFPLDLERDATFVLVFEDATMKNLSHKMHMNLVLIKSGWVVNVSTKILISDQ  
AIASYEDAGAHTQPSESALAAISSRVMAPIVLVVSQKPTAPSKTLFLEALNLLDEVSTSTVNVNPKRYFV  
FEGDVISELGTMDAAVLKGIQRPQPDSMRRRAVVATAIRLAIAIQASGILASLEAGRINFSTRVSLAA-  
TYALLDIALEAVIG--ALAFVRNHKVNTRKRPYKGHPKVLHKADIDKKLIAAGVDTIA  
>GCA\_000473145  
AVIKPVEINKYAPVLMIRQQEVATVSGAGSPSLRAKTVYAKSGLQKRTMTKWVAKPIYF-  
GVLKMGNIQVLVSISVDNRAVCTVAQVVEQEVVHGLVALDAVKRKIALEEMGGMTTEDPAKVAEF  
EAEIDLKRFRDADARADMLPVMGLTLEVKFDPEPVPVHDLAVPVIYEVI-  
GIMADKGGIEVDDCAISNAVSDVDPIAYVSPIDLEAVAGEQMAFIDQEA AVAAARETIALEELALEAGI  
LVVGIDPLLLPV-FGEDADV-MSFAARSRTLGSIVALAVAYEELTRA-IDG-IASRM-  
MAAAQAAAALAEKRGTAEEIRIVKRMQRSSGLADDPELVILEDSAEGNSSWAGQIYDDPVSGSSES  
AGNIVYAANKRQNFARSITFLRKVEISDKAAAPLMRGVKHNSKRSARKLDDAIAGLNFPNVPPGIAIR  
AEAGRTADRLLHDAAEGELIMIVVRWHVTWKTAVAIALVYQAEDLVGLIELGGIAAVGRPDGILNRH  
HKLNGSLIEQRPIVEKLTLLRLRASLKEKLGKDQVIIFVVKVQGDVLVADATIQMG-  
GPVGAVVAIQGELIFVRRHKQTVITDQEATV-VLKGVAEGPADAQALLRIRVTHTLVGLSVLLIPE-  
PVLVESVQIREGVGKSLQIIQLDVYLLRDMGTGEETLAESRSRELIREVLAVDPITGVRLAFGKLKERMGK  
KLGLKDL-----  
GKLYQIDGDLRELPSVKSILGLVDTKAPKVL SAGYAEERLRIRFADCEVLGTDANLYPYKEERRELLRM  
VPVYLILEAKRRQLIIFALS LKGGHRTMMALGVMLAAAIIESQA EKGEVHHETPEILLDDAEVVGTSIM  
LSRQASLDLKQINKVDVIVLFPEFQEKMVVSLKFFCTEVAIFVIALITTVGEMLSREPEHAQEEGAGFQK  
RIRGHSMLFALAVVFDRRNCRA-  
LPDLFLALGLAEPYRGILYTNQPKKKQMPSEPDGDRVDGFELVHAVKEDGAS-  
HELEMPEAMALAVE-  
DATINLSAGVLAMNGGMVAIEKVDSKRKVALAATKWNISKLELADVHISGSAPTRSCG-  
IEQAELSAALEAKKVWFLFLPGASNAELEEAKLDGAGASTADAADDKQIHILLVKPVLVVIQDSNSAGL  
ISNGGLDEWGTMAYKKHYAFAARMRLHMRTID-----  
DMAPNKQKSEKVKTVKLEGDTRFRQLATDGVKEQMP-LHALNPDAFV-  
LPLLVTAVGSVAADENVLGAQVPVGASL-  
RELQKSQKGSALPISAVRLLAMRAARGMIEEDIMVAGKVAA-  
LLKIRALETVIAILLRNDTEATLPWRLSVAEKLEADTKRASGFAARPFKTKPSLCNTQAHAKIADPIQEIA  
AGYVAAEERFVFPVEDIAIRLILSNPHSRVEEKKRGGEGLHGMMAKELLAKAVVMLRNEPGTNTTEGLL  
NYLTTNQPTDLLFEDCLDVIIDIRMSVV-----  
VHLNTV-  
HVAVAGVRSVGDYEIMSAKFPSGLVQVERVDDRTGREKTLMW MYGAMEELWLMSARWADWVPD  
CAIGAILHVYAQEINRAFS LKRLQLDGWPKEASRWWNTWQLWL NKGDFGYEAAFRVVKQVLKAT  
LDFEMS NVEGVGRYQSKQELRVGYRIRQQVEFARLDPRTDILLQAKTRLSVIRHALEVVAILLRDVAP  
EFTLVVAYQDVARGHVECVLAESFDFTEKNAHIGPVGLRTPASIFGDGTVLKEAVLGKIDLANTVAEFR  
YLVILDGGRTLGV EWISLRNMLYERIWLPPAQAALKNLLPICFFLQHPELDLAWA-  
ALFEGISKARADKLMAGALVEEILEGVARFADPEATTHQSKKAKHFKYYGEEVDPVHLAYILDLFALVST  
QVVVSDRLLKDRYVLNLKVFRGFTALWWMALQLSPKGPSATVITVGTIAGLGALVLFILL-

RDSVLVETLYRYVY--MKGYEAAKDVQDADPEHLGQLAAASRDIEWIEIIPAFFYYFDTAT-  
FEPFNTAVAKEFFGLFEERLRIIDVLAVPPDRVAALVEFVALAGTLATSAEALVGVIACGLCEPNAAEVL  
AERDWNLHRSMGITLAFFEARESVKGYFDKGLHKDVAEIGLKEAGALTTHFRCDVDAKQIAPAVHRIL  
DLGEIEAALIEIDS AVVVADEEQTLADKPTTRDKSVGAIGGVVLAGTMNMGANLDSVERGGNIIIELEE  
EHYHAVNGKKADGKLTDKVLMVLSVAYFPVIRRFASANALDRGVFGLLIDAPEDADNLDHGRVMTIP  
APSVLAETTPLYAAEIDKIAWIAPLHLLGTLPAVL-  
FEPDFQGFISMMIDASLEIMETAEVLDYHVLERGSRPPKFRVILIKGLHIRLLAAAGTILVVGSA  
GRTEV  
TAYIQGQAVPISLSKNTFLPAFSPSSCKAVDIFSTLLRPPERSAVEMLILETVAEL-  
LEVTRLSNDKLERLLVLLPGLDMAELLGLLAAQDFADIVTLGAAITAILSVAAESVVLREMLLT  
KAEIAIT  
ALALAIALLMLTGDEGLTQKEQAREAQMKELIQAGAVLQIHAADAMVLASTADKVR  
LDTDEGTTSA  
FASLNLATVSDGFYVLSSAVLQMSSDLMMIVAVARVLADKESKNALVVRHPEQVKTQPT  
YAEGLSPG  
MVLQTLTGCIPLAIKPEEVELLWTLVAALWRVKAHLASAARPHTERVLILLALGLIV  
VLLQSEGGGM  
GGG-  
IGAAAKLLAAFSILTMKAAVGDEVKVRTRVMDLSSRLGRPEETVNPEFKGEELDQTKYEA  
ENVEVDC  
VETVRRFVDIPFLVSVRTQHNESEDGRARLVLDVSRVRFIDL-  
VTKKS DVILVERVETDGIARQMAKDMQSLHDEAAALGKVSQQLQHFIALGDAHISNYVT  
AEAHSVLG  
MLLLVLFIQQVRVSKVWPTRREVMTVMFIMAALALFFLVIGLGLNIVFMVGGISPLQIT  
TLVLGEGVMA  
VRQTSTFPAES-  
VTILQNTYADLICAGRVTKADIEKSLHIVVGARVARGTWVYIYHYEITQAQSPAGIMQRA  
FRQATLSQS  
LIDGRMEVKIKVVTSDRYA-  
TYEIKGGQHRKGTRYNRVKVGHNIPVDVLARIKMAFAPPNLVLVKTFGAVVQKRFAQPL  
THMRHGA  
VTIGPMEVSSPYIQAKKARHAPGDSVVDIKPDNIVRSVAVVPELIWARENEDQSAVHEKY  
VKTT HKIA  
AKRNR AVDKAQYDKRNQVHLSFIGLAVKVLPEQAI VHATAGTLLPTESVSVTENLKGVA  
ATIRLDPME  
KALIAYIKRMRPQLNLQGKTDNKIVKCLNNNLDDVEWGKLGRRKIKPITIKSVYDVEHE  
RATLVKLMP  
YKDDVEGRKSQFAEK--  
ALFEPLKAFMMLFGFIARAVYALYLRVIRRTILLVKT KIVVNAETVLSAIIIGVSIRL  
RHKSTNIADTKHHIK  
TIEARARMTLAGAPAVKLHLRPGRVGKKGRIKGYMPYKNYNIFDGLASGRRAKVKELAK  
LKKVDKI  
AVEGIRTRQ-  
GGRLSKADLSNALSNTVRDVEVVGENVQEASNPRANAEMGQIFAAIDARVYSLVAALIGH  
ALEALLA  
LCAILGIGRAHALLAVY-KMNAGIGMHSAA-VAAAVAAA-  
YSQPGGEATALWDVSEGD LGALASEGSLDVCRLRRRQIG-  
LKKTKEAYMSLTCSGRGDKVKIIEATQTQAYEIVATRTAERHGIHAKGTYGKERAMMQIT  
PTKPVKV  
WVPV FVSDEELLAPVRAFAETNGDGV DVVLA KDVKITMFEKGVASLAVSGKNTTVVYT  
VLEKVTEL  
MKDIIYEQRAKAHYGRGRLRSHVVTHTKQKRHL SMMKRTVVADPSMDAARLS DGEVSV  
VTGATMA  
FVMSEQDAV--  
GDVDYHFHEEPRREAQLGIAGPETFLSTEQPRLLAMLFLREYLIHIVDIGTVGGFADAAT  
IYDILRAMQN  
KLDRKLSADIAKVRMCLHDDVEGMGVKAEAPRRDQAGDAILSAYWINGVTANNDIILLV  
ANLECKTA  
PENINCAVRLFYQRITLQAKERDGDVSVKLVPAQNQIEAAEGTVIYTIKGNNPSTVQM  
KLNIEGISRSIV  
KSLALQLFQVDVFLNDTWIATLLRAAQDVVFVDAREGKEAVD HVIERDTELEMAPQK  
DIVARKIRVYT  
PAAPSAVVIWDPAIEREDKADAQGTILMIYGPLDQDISCFTDIGSEPKIESLAAWDEKE  
KYVVRDDIPE  
DI-  
TLVGKSSKVNKEFGIPDVAVCAPAKPGVTESIDRQEPKAGTCGEVANLPYPQESLVN  
RVSSANVQKNI  
SMVLGGHPVGEMGISRGVERHLETNMCEIFVDKPDIDVALDFYKIALTSLRVGLDKP  
NAKVEIDGKESR  
KLMAVKDGDATLQRHPKVSEESG--RKAGEKAKLPDDALIYDGVQHGDIKFTATDLPD  
GRV-

VTPVIMSVKAQLEIDKVMLKSFHVVTLSFSNDKAEHLIKLRNLNALKKSTRHYEMLLKIRDTECAQSPHA  
IPVGKILKIDALLQTICKAHYTAIEPLLADDLTALGVMGDQGLLHVVPRLMIIALLHLCELGAAAAIPHW  
RLQQAAILTDQTMGLAVRERRWSF-AISEVTGNTFFARTKDDDEQRLHARNPI-VIL-YGKEGML-  
ISPSGLRLASTAPSDKGHGNDKILSPERLQDAMYYYYVLKVLLVFVDEIILAYGSGEGPLKFLVAHQAV  
TGRDNPQLVCLTRRTFPLDLQRDATFVLVLADTTMKNLSHKKMHMNLVLVKPSWVENVSTKILISD  
QAIASYAEDAGAHTQPSESALAVITSRVIAPIVLVVSQKPAAPSKTLFLEALNLYDEITATVQKRPKRYFIF  
EGDVVSVLGTLDAAVILGMQRPQPDRLRAVTAHAIRLAIALRGSGVLASLEGGAINFSRAVDFAA-  
TYPGLEA-----DFRVRNHKTSTKRDRPYKGHTKFLHKAEEKALIAEGVDTIA  
>GCA\_000473165  
AVIKPVEINKYAPVLMIRQQEVATVSGAGSPALRAKTVYAKSGLQRKTLTKWVAKPIYF-  
GVLKMGNIQVLVSISVDSRAVCTVAQVVEQEVVHGLVALDAVKRKIALEDMGGMTTEDPAKVAEF  
EAEIDLKRFRDADARADMLPVMLGLTLEVKFDPPHEPVVHDLAIPVIYEVI-  
GIMADKGGIEVDDCAISNAVSDVDPIAYVSPIDLEAVAGTEMAFIDQEA AVAAARETIGLEELALEAGIL  
VVGI-PLLLPV-FGEDGNV-MSFAARSRTLKSIVALAVAYEELTRA-IDG-IASEM-  
MAAAQAAALAEKRGTAEIRIVKRMQRSSGLADDPELVILEDAAEGNSSWAGQIYDDPVSGSSES  
AGNIVHAANKRQNFARSITYLRKVEISDKAAAPLMRGVKHNSKRSARKLDDPIADLNFPNPPGIAIR  
ADAGKPGDRLLHDAAEGELL-  
IVVRWHVTWKTAVAIALVYQAENVVGLIALGGIAAVGRPDGILNRHHKLNGSLIEQRPIEKMTLRLRA  
SLKQKLGKDQIIIFVVKVQGDVADATIQMG-GPVGAVVAIQGELIFVRRHKQTVITDQEATV-  
VLKGVAEGPADAQALLRIRVTHTLVGLSVLLIPE-  
PVLVEAVQIREGVGKSLQIIQLDVYLLRDMGTGEETLAESKSRELIREVLAVDPITGVRLAFGKLERAGK  
KLGLKDLE-----  
QSILAAVTEPRMENLPEGVCRNFIAAGPAAAVGMLFLLLDEAGKLYQIDGEMRELTKSVKSLIGLVDSK  
APKVL SAGYAEERLRIRFADCEVLGSDANLYPYKEERRELLRMVPVYLINAAKRRQLIIFALS  
KGGHRR  
TMMALGVMLAAAIIESQAENGEVHHRAPEILLDDAEVVGTAIMLSRQAALDLKQLGKVDVIVIFPEFQE  
KMVVS LKFFCTEVAIFVIALITTVGEMLSREPEHAQEEGAGFQKRIRGHSM LFALAAVFD  
RRNCRDA  
-LPDLFLGLGLAEPRYGILYTNQPKKKQMPAEPDGERVDGFELVHAVKEDATS NHELE  
MPEAMALAVE  
-DATINVSAGVLAMNGGMAAVEKVDSKRKVALAATKWNISKLEIADVHISGAAPVRSCS-  
IEQADLSAALESKKVWFLFLPGASNAELEEAKLDGAGASTADAAADKQIAILLVKPVLVVIQDS  
NSAGL  
ISNGGLEEWGTMAYKKHYSFAARMRLHMRID-----  
MAPNKQKSEKVKTVKLEGDTRFRQLAIEGVKEQMP-LHALNPDAV-  
LPLLVT  
PAVGSVAADENVLGAKVPVDASL-  
RELQKSQKGSALPITAIRLLAMRAARGMIEEDIMVAGKVAA-  
LLKIRALETVIEILLRNDSEATLPWRLSVAEKLEADTRRASGFAARPFKTKPSLCNTQAHSKIAD  
PIQEIAA  
GYVAAEGRFVFPVEEVAIKLILSNPHSRVEEKKRGGEGLHGMAKELLAKAVVMLRNEPGTNTEGL  
LN  
YLTTNQPTDLLFEDCLDVIIDIRRMSSV-----  
VHLNTV-  
HVVEGVADVGDYEIMSAKFASGLIQVEQVDDRTGREKTLMW MYGAMEELWLMSVRWADWVAD  
CAIGAILHVYAQEINRAFS LKRLQLDGWPKEAARWWNTWQLWLNKDGFFGYDAAFR  
AVKQVLKAT  
LDFE MSNVEGVGRYQSKQELRVGYRIRQQVEFARLDPRADILLQAQTRLSIRHALEVVAIL  
LRDVAP  
EFTLVVAYQDVARGHV ECVLAESFDFTEKNAHIGPVGLRTPANIFGDGTVLKEAVLGKID  
LANTVAEFR  
YLVLLDGGRALGVQWISL-NMLYARIWLPPAQAAKNLLPICFFLQHPELDLAW-  
AGLFEGISKTRADKLMAGALVEEILEGVARFADPEATTHQSKKAKHFKYYGEEVDPVHLAYIL  
GLFALV  
ATQVVVSDRLLKDRYVLNLKVFRGFTSLLWLALQLAAKGPSATVITVGTIAGLGALVLFILL-

RDSVLVETLYRYVY--MKGYEAAKDVQDADPEHLGQLAAASRDIEWIEIIPAFFYYFKTAS-  
FEPFNTAVAREFFGLFKERLRIIDVLAVPPDRVAALVEFVALAGTLATSAEA-  
VGVIACGLCEPNAAEVLAEERDWNLHRSMGITLAFFEARESVKGYFDKGLHKDVAEIGLREAGFTTH  
FRCDVDAKQVAPAVHRTLDLGEIEAGLIEIDSAVVVADEEQTLADKPTRDKSVGAIGSVVLAGTMN  
MGANLDSVERGGNIIIELEEEQYHGVNGKKADGKLTDKVLMVLSVAYFPVIRRFASANALDRGVFGLLI  
DAPADADNLDHGGDMTIPAPSVLAETTPLYAESDIDKIAWIAPLHLLGTLPVLLFEPDFQGFISMMID  
ASLEIMETAEVLDDYHVLEKGARPPKFRVILIKGLHIRLLAAIGTLLVGSAGRTEVTAYIQGQAVPISLRK  
HTFLPAFSPSSCKAVDIFSTLLRPPERSVLMILETVAEL-  
LEVTRGTNEKLERLLVLLPGLDGAELLGLLAAEDFADIVTLGAAILSVAAEAVVLREMLLTKEIAIT  
ALALAIALLMLTGDEGLTQKWQAREAQMKELIQAGAVLQIHASDAMVLAADKVRDLTDEGTTS  
AFASLNLATVSDGFYVLSSAVLQMSSDLMMIVAVARVLADKETKNALVVRHPEQVKTQPTYAEGSPG  
MVLQTLTGCIPLAVKPEEVELLWTLVAALWRVKAHLASATRPYHERVLILLLALGLIVVLLQSEGGGM  
GGG-  
VGAAARILAAFSILTMKASVGDEVKVTTRVMDLSSRLGRPEEAVNPEFKGEELDQTKYEAENVEVDC  
METVRRFVDIPFLVSVRTQHNESEDGARLVLDVSRVRFIDL-  
VTKSDVILVERVETDGIAREMAKDMQSLHETAAALGKVSQQLQHFIALGDAHISNYVTAEAHSVLGM  
LLLVLFIQQVRVSVVWPTREVTMVFIMAALAVFFLVIGLGLNIVFMVGGISPLQITTLVLGEGVMGV  
RQTSTFPAES-  
VTILQNTYADLICAGRVTKADIEASLHIVVGARVARGTWYVIYPYEITQAQAPSGIMQRAFRQATLSQS  
LIDGRMEVKIKVVTSDRYA-  
TYEIKGGQHRKGTRYNRVKVGHNIPVDVLARIKLAFGPPNLVLVKTFGAVVQKRFAQPLTHMRHGAV  
TIGPMEVSSPYIQSKKARHAPGDSVVDIKPDNIVRSVAVVPELIWARENEDQSAVHEKYVKTTHKIAAK  
RNRAVDKAQYDKRNQVHLSFIGLAVKVLPEQAIHVHSTAGTLLPTESVSVTENLKGVAATIRLDPMEKA  
LIAYIKMRPQLNLQGKTDNKIVKCLNNNLDDVEWGKLGRRKIKPITIKSVYDVEHEQATELVKLMPYK  
DDVEGRKSQFAEK--  
ALFEPLKAFMMLFGFIARAVYALYLRVIRRTIVLVTKIVANAETVLSAIIIGVSIRLRHKSTNIADTKHHIK  
TIEARARMTLAGAPAVKLHLSPGRVGKKGRIKGYMPYKNYNIFDGMASGRRRAKVADLAKLKKVDKA  
IAVDGIRTRQ-  
GGRLPKADLSNALSINTRVDVEVVGENVQEASNPRANAEMGQIFAAIDARVYSLVAALIGHALEAVLA  
VCAIMGIGRAHALLAVY-KMNAGIGMHSA-AVAAVAAA-  
YSQPGGEATAIADVSEGDLSALAISEGLDVCRLRRRQIG-  
LKKTKEAYMSLTCSGKGDKVKVIEATQTQAYEIVATRTAERHGIHAKGTYGKERAMMQITPTKPVK  
VWVPVFTDEELLAPVRALAETSGDGVAVVKLANDVKITMFEKGVASLAISGKNTTVVYTVLEKVTALA  
KDIIYEQRAKAHYGRGRLRSHVVTHTKQKRHLSSMMKRTTVADPSMDAARLSDGEVSVVTGATMAFV  
MSEQDAV--  
GDVDFHFHEEPRREAQLGIAGPETFLSTEQPRLLAMLFLREYLMHIVDIGTTGDFADAATIYEILRAMQ  
AKLDRKLSADIKVRMCLHDDVEDMGVKAEPRRDQAGDAILSAFWINGVTANSDIIMLVANLECKT  
APENIDCAVRLFYQRITLQAKERDGDVSVKLVKAQNQIEAAEGTVIYTIKGTPTAQMKLNIDAISRSI  
VKSLAVQLFQVDIFLNDTWIATLLRAAQDVVFDAREGKEAVDHVIERDKELELAPQKDIVARKIRVYT  
PAAPSAVVIWDPAIEREDKADAQGTILMIYGPLQDISCFTDIGAEPKIESLAAWDEKEKYVVRDDIP  
EDITTLVGKSSKNKEFGIPDVAVCAPAKPGVTESIDRGEPKAGTCGEVANLPYPQESLVNRVSSANV  
QKNISMVLGGHPVGEMGISREVERHLETNMCEIFVDKADIDVALDFYKIALTPLRVGLDKPNAKVEID  
GKESRKLMAVKDGEARLQRHPKVSEESGTR-  
KAGEKAQLPDDALMYDGVQHGDIKFTATDLPDGRV-

VTPVFMSVKAQLEIDKVMLRTFHVVTLSFSNEKAEHLIKLRLNALKKSTRHYEMLLKIRDTECAQSPHA  
IPVGKILKIDALLQTICTAHYTAIEPLLAEDLTALGVMGDQGLLHVVPRLMILAILHLCELEAEAAISRWQ  
LQQDAILTDQTMGLAVRERDWSF-TISEVTGNTFFARTKDDDDTVERLHARNPI-VIL-YGKEGML-  
ISPSGLRLASTAPSDKGHGNDKILSPERLQDAMYYYVLRVLLVFVDELILVYSGGESPLKFLVANQAV  
TGRDNPQLVCLTRRTFPLDLQRDATFVLVLADTTMKNLSHKKMHMNLVLVKPSWVENVSTKILISD  
QAIASYAEDAGAHTQPSESALAVITSRVIAPIVLVVSQKPAAPSKTLFLEALNLYDDITATVQKRPKRYFI  
FEGDVVSVLGTMDAAVILGMQRPQPDRLRRAVTARAIRLAIALRGSGVLASLEGGAINFSRAVD FAT-  
TYPGLEA--GLAIV-EALDFVRNHKTSTKRDRPYKGHTKFLHKAEAEKALVAEGVDTIA

>GCA\_000473205

AVIKPVVMKAYAPVLMIRQTQVATVSGAGSPSLRAKTVFRKSGLQRKTTSKWVAKPLY-  
GVVKMGNIQVLSISVDNRAVCTVAQLVEQEVVHGLVALEAVKRKIALEEINGMTTEDPARVAEFE  
AELDLKRFRDADARSMDLPVLLGLTLEVRFPHEPVVHDLPLPVIYEVI-  
GIMADKGGIEVDDCAVSSAVSDVPITYVSPIDLEAVAGTEMAFIDQESAVAAARETIALEELALEAGIL  
VVGI-PLLLPV-FGEDGDV-MSFAARSRTLKSIVALAVAYPELTRA-IEVAIASGM-  
MQAAQAAALAEKRGTAEQIRIVKRMQRSSGLADDAELVILEDAEAGNSSWAGQIYDDPISGSES  
AGSIVHAANKRQNFARSITFLRKVEISNKAAPLMRGVKNHNSKSR TARKLDDDIAGLNFPNVPPIAIR  
AAAKKPADRLLHDATEGEEILLVVVRWHVTWKTAVIVLLVLLAGDVVGLIRLGIAAVGRPDGMLNR  
HHKLNGLIEQRPIIEKMTLRLRAALKEKLGKDQVIIFFVKVHGDLIADATI QMG-  
GPVGAVVAIQGELIFVRRHKQTIITDQEATV-VLKGVAEGPADAQALLRIRVTHTLVELSVLLIPE-  
PVLVDNVSIREGVGKALQIIQLDVYLLRDMGTGEETLAESRS-----

RSILADVTEPRMENLPEGVCRTFITAGPRAAVGMLFLLLDQAGKLYSIDGDMRELTKSVKSLIGLVDSK  
APKVL SAGYAEARLRIRYADCEVLETEADLYPYKEERRQLMRMVPVYIIAEAKRRQLILFALS LKGGHRR  
AMMALNVMLAAAIIESQAEQGSVHHQAPQILLDDAEVVGTAIMITRQGALDLKQILKVDVIVLFPF  
QEKLVVSLKFFCTEVAIFVIALITTVGEMLSREPEHAQEEGAGFQKRIRGHSVLFALVTFDRANCRRDA  
LPDVFLGLGLAEPRYGILYTNQPKKKQMPSEP DGRVDGFELVHAIKEDGRS-EELEMP EAMALAVE-  
DATINVSAGVLAMTGGMVAVEKVDSKRKVALAATKWNISK LPLVDVSISGAAPVRSCG-  
IEQAGLSAALEAKKVWFLFLPAASNAELEEELD GAGSSTAEEAEDKQIDILLVKPVLVVIQDSNSAGLV  
ANDGLDEWGTMAYKKHYAFAARMRLHMRTID-----

MNPNKQKSEKVTKVLEGDTRFRQLAVEGVKEQMP-LHALNPEFAV-  
LPVLVTPAVGSVAADENVLGAKVPVDASL-  
RELQKSQKGSALPISAIRLLSMRAARGMIEEDIMVAGKVAA-  
LFKVRALETIVKLVLRNDSEATLPWRLSVAERLEADTKRASGFAARPFKTKPSLCNTQAHSKIADPIQEIA  
AGYVATESKFVFPVEGIDIKLILSNPHSRVGEAKRAGEGHLHAMAKELLAKAVVMLRNEPDTNTEGILN  
YLTTNQPTDLLFEDCLDVIIDIRMSVV-----

VHLNTV-

HVVVDGVRPVGDYEIMAAAAESGLIQVEQVDDRTGREKTMMWMYGAMEELWLMSVRWADWVA  
DCAIGAILHVYAQTINRAFSRLQLDGPKEAARWWNTWQLWLNKDGFFGYDAAFRAVKQILKA  
TQADFEMKDV EGVGRMQSRQEV RAGYRIREQVEFARLDPRADILLQAKTRLSIRHALEVVAIILRDV  
APEFTLVVADQDVARGHVECULAESFDFTAKNTHIGPVGLRTPQSILGDGTVLKEAVLGKIDLANTVA  
DFRYLFIVDGGRALGVVWLTLENMLVGRIWLPPAQAALKNLMPICFFLSHPELDLGI--  
LFAGISKARAEQLMAGALVEEILEAVVRFAEPEATTHQSKKEKHFKYYGEEVEPVHLAYILAIFALVATQ  
VTMSDRLLKD RYVNLNRVFRGFTALLWLSLQLAAKGPVATVITVGTIAGLGALVLFILL-  
RDSVLVETLYRYVY--

MKGYSAAKDVQDADPEHLGELSAASRDIEWIEIIPAFFYYFKTATSRRTLNTAVAREFFGLFKERLRIIEVL  
AVPPDRVAEFVAFVALAGTLDTSATALEGVIAVGLCEPNAAAVLEAERDWNLHRSMGITLAFFEARDS  
VKGYFDKGLHKDVAEIGLREAGFTTHFLCDVDAKQVVP AIHRVLDLGELEAGLIEIDS AVVVVADEEQT  
LADKPTTRDKSVGAVGGVVL AGTMNMGANLESVERGGNIIIEEEEQYHCVNGKKADGKLT DKVLM  
VLSVAYFPVIGRFASANALDRGVFGLLIEAPTDADN QDHGGQMVIPIPSIHSETTPLYAESDIDKIAWIA  
PMHLLGTLPVLLFEPDHYGFISMMIDASLDIMLTAEV LDDYHVLEKGARPPAFRVVL IKGMHIRLLAA  
VGTIIVVGSAGRSEVTAYIQDQAVPIILKKQTFLPAFAASSCKVVDIFSTLLRPPERSAVEMLILETVAEL -  
LEVTRGENDKLERLLVLLPGLDLASLLALLALADD FSDIVTISAAITAILSVA AEAVILREMLLT KAEIAITAL  
ALALALLMLTGDEGLTQKEIAREAQMKELIQAGAVLQLHADDAMV LASTADKVRLDTDEGTTS AFA  
SLNLATVSDGFYVLSSAVLQMSSDLMMIVAVARVLADKESKNALVVRHPEQVK TQPTYAEGSPGMV  
LQTLTECIPPLAVKPEDVELLWTLVAALWRVKAHIASAARPHQERV LILLALLGLIVVLLQSEGGMGSG -

ASSAAKVLACFSILT LKASVGDEV RKVTRRVMDLSSRLGRPEEAVNPEFKGEELDQTKYE AENVEVDC  
METVRRFVDIPFLVSTR TQHNESED RGARLVLDVTRVRFIDTVVTKRSEVILVERVETDGV IAREMAKD  
MQALHETAAALGKVAALQHFIALGDAHISNYVTAQAHSVLGM LLLVLFIQQVRVSKVWWPTRREVT  
MVFIMAALAVFFLVIGLN -NLVFMVGGISPLQITTLVLGEGVMAVRQTSTFPAES -  
VTILQNTYADLICAGRVTKADIESSLHIVVGARVARGTWYVIYHYEITQAQAPAGIMQRAFRQATLSQ  
SLIDGRMEVKIKVVTSDRYA -  
TYEIKGGQHRKGTRYNRVKVGHNIAVDLLARIKMAFGPPNLVLVKTFGAVVQKRFAQPLTHIRHGAV  
TIGPMEVSSPYITSKKARHAPGDSVVDIKPDNIVRSVAVPELIWARENEDQSAVHEKYVKTTHKIAAK  
RSRAVDKAQYDKRNQVHLSFIGLAVKVLPEQA-----

-  
RMRPQLNLQGKTDNKVVKCLNNNLDDVEWGKMGRRKIPITIKSVYDVEHRKATELVKLMPYKDDV  
EGRNSQFAEK--  
ALFEPLKAFMMMFGFIARSVYALYLRVIRRTIILVKT KIVVNANNVLSAIIIGVSIRLRHKTTNVAETKHHI  
KTIEKRARMTLAGTGAVKLHLS PGRVGGKKGRIKGYMPYKNYNIFDGLASGRRAKVAELAKLKKMDKV  
IAIDGIRTRQ -  
GGRLPKADLSNALSNT RVDVEVVGENVQEE SNPRANAEMGQIFAAIDARVYSLVAAMIGHALEAVL  
AVCAILGIGKAHVMLAV -LKMNAGIELHSAA -VARAVAAA -YAQPGGEA -  
AIADVSEAYLQALIISEQSLDVCRLRRRQLG-----

RHGIKAKGTYGKERAMMQITPTKPVKVVVPVFVNDD ELLAPVRAVAETNGDGVTVVKLSNDIKITMF  
EKGVASLAISGKVTSLVYTVLEKVTELMKDIIYEQRAKTHYGRGRLRSHVVTHTKQKRHLSMMKRTV  
ADPSMDAARLTDGEVS VVTGATMAFVMSEQDAV ---  
DVDLHYQEEPRREAPLGIAGPETFLSTEQPRVLALLFLRAYLMHIVDIGTVGGFSDAATIYDILRAMQN  
KLDRKLSAEIAKVRMCLHDDVEGMGVS AEAAARRDTAGDPILSAYWINGVTANNDIILLVANLECKTVP  
ENIDCAVRLFYQRVTLQAKERDGDVSVELVAAQNQIEAAEGTVIYTIKGKTPSTAQMKNIEAISRSIVK  
SLAVQLFQVNLFLNDTWIATLLRAAQNVVFDAREGKEAVDHVVERDTALEFAPQRDIVARKIRIYTP  
AAPSAVVIWDP AIEREDKADAQSTILMIYGPLQDISCFTDIGAEPKIESLASWDEKEYVVRDDIPED  
I -

TLVGKSSKVNREFGIPDVQVCAPAKPGVTESIDRGEPKAGSCGEVANLPYPQESLVNNVSSANVQKNI  
SMVLGGHPVGEMGIARDVERHLETNMCEIFVDKADVDVALDFYKIALTPLRVGLDKPNAKVEIEGKES  
RKLMAVKDGEAALQRHPKVSEESGTRVGGGEKAKLPSDALIFDGVQHGD LKFTVTDLPEGRV -  
VTPVFNEVKAQLEIDKVMIKTFHVVTLSFSSEKGEHLIKRLNALKKSTRHYEMLLKIRDTECAQSPHAI  
PVGKILKIVSLLQTCIVAHYTAIEPLMADDLTVLGVMGDQGLLHVVPRLMILAVLHLCPLEAEMLRSW

PLQQRAILTDQTMGLPLRDRRWSY-AISEVVGNTFFARTKEEDTEQRLHARNPI-MIL-YGKEGML-  
ISPSGLKLSSTNPSDADHGNEEQILSTERLQDKMSYHILAILLVFVDEMILAYGSGDEPLKFLVANQAV  
TGRANPQLVCLSRRTFPLDLQRDAVFVLVADTTMKNLSHKMHMNLVLVKPKSWVENVSTKILISD  
QAIASYAEDAGAHTQPGESALAIITSRVMAPIVLVVSQKPTAPSKTLFLEALNLYDEITATVQKRPKRYF  
VFEGDVVSILGTLDAAVILGMQRPQPDRLRRAVVAAAIRLAIALRGSGVLAQLEARMINFARAIDFAQ  
-VYEGLEAALASAIS-AALDFRVRNHKVTKRARPYPKGHTKFLHKASAEKGLVAEGVDTIA  
>GCA\_000473225  
AVIKPFLYTKYAPVLMIRQSEVATVSGAGSPSLRAKTVYAKSALSRTFTKWVAKPIYY-  
GVLKMGNIQVLVSISVDARNVCTVAQVVEQEVVVHGLVALEAVKRKIALEEISGMTTEDPAKVAEFEE  
EVDLRRYREADSRADVLPVMFGLTLGIRFDPHEPVVHDLPIPVLFVV-  
GIMADKGGIEVDDCAISNAVSDVPITYVSPIDLEAVAGTEMAFIDQEA AVAAARESISLEELALEAGIL  
VVGIKPLLLPV-FAQDADV-MSFANRSRTLGSIVELAVAAEQVSRARID-GIASAM-  
MVRVLSAALAEKRGTAEEIRIVKRMQRSAGLADDPDLVMMEDAAEGNSSWAGQIYDDPISGSSED  
SAGNIVHAANKRQNFARSITYLRKVEITDKAAAPLMRGVKHNAKSRTSRKLDDAIAQLNFANVPGGI  
AIRAEDKPADTLLHDATQQEEILLVVRWHVTWKTAVIVALTFTAGDIVGLIELGGIAAVGKPDGLLN  
RHHKLNGSLIEQRPIIEKMTLRLRASLKEKLGKDQVIFVVKVQGDLVADATVQMG-  
GTVGAIVAVQGELIFVRRHRQTIVTDQEATV-ILKGVAEGPADAQALLRIRVTHTLVEISVLLIPD-  
PVLVESVSIREGVGKTLQIIQLDVYLLRDMGTGEETLAESTS-----  
-----  
LSMLVAVTEPRMENLPEGVCRRFITAGPRAAVGMLFLLDDAGRLYIIDGDLRELTKSIKSLIGLVDSTVP  
KVLASAYAEDRLKIRFADCEVLQAEADLYAYKEERRELLRMVPVYIINEAKRRQLVILALSLKGGHRRQAQ  
MALGVLIAAAIIESQAQNDPIHHAIPAILLDDAEVVGTEIMISRQAALDLKQRLKVDVLVIFPEFQEKMV  
VSLRFFCTEVAIFVIALIVTVGEMLSREPDHAQEEGAGFQKRIRKHSTLFALSVTFERRNTGDA-  
VPDLFLGMGLAPPRYGVYITSQPKKKQMPSEPDSERVDGFELVQAIKEDTGSNHELDMPPEAMALAVE  
-DASINVSAGVLAMTGGMVAVEKVDSKRKMALAAT-----  
-----  
LFLPGASNAELEEVLKLDGAGSSTIDAAEDRQTAILLIPVIVVIQDSNTAGLITNGGLDEWGT MAYKKH  
YAFARMRLHMRID-----EMAPNKQKAEKIKTVKLEGDTRFRQLATEGIKEQMP-  
LHALNPDAFV-LPILVTPAVGSVAADENVLGAAPVDASL-  
RELQKSRKGTALPISAVRLLGMHAARAMIEEDIMVAGKVAA-  
LLKIRAVETIVDILLRNDSEASLPWRLSVAEKLEADTKRASGFAARPFSSKPSLCNTQAHACIADPIETIA  
AGYVAAEQRFVFPVEGIPIQIVLSNPHSRVGTAKRAGEGHLHEMAKELVAKAVLMLRNEPDTNTEGLL  
NYLTNNQPTDLLFEDCLDVIIDIRMSVV-----  
VHLNTV-  
HVVVQGVPRVPGDYEMAANAASGLVQMERVDDRTGRERTIMWMYGAMEELWLMSVTWADWVV  
DCAIGAILHVYAQNLNRAFSLKRLQLDGWAPEANRWWNTWQLWLNKDGFFGYDAAFRVRQVL  
KAALAEFEMRDVKGVGGRMLSKQEV RAGYRIRAQVEYARLDPRTDILLQAKTRLVIRHALQVVAILLR  
DVAPEFT-  
VVAHQDVARGHVECVLAESFDFTAKNAHIGPVGLRTPETIFGDGTVMQDAVLGKIDLANTIEEFYR  
MLVDGGRQLGVSWSLIQNMLYARIWLPPAQAALKNNLPICFFLSHPELNLEGR-SRFA-  
ISKARADQLMAGALIEEILEGVARFAQPEATTHQSHKEKHFKYYGEEVDPVNLAYIFTETALVATQVTIS  
DRLLKDRYVLNLRI-RGFTALLWLSVQLAEKGPSATVITVGTIAGLGALVLFILL-  
RDSVLVETLFHRYVY--MLGYSAAKDVADADPEHFVVLAAASRDLEWVEIVPAFFYYFKTAT-  
FEPFNTAVAKDFFGLFKERLRLVEVLAVPPDRVETLKEFVALAGTLRTSAQA-



PGIIATKLCEPNAAA VLEAERDWN LHRSMGITLAFFKAQVSVHGWFDKGLHKDVAEIGLREAGAITTH  
FLCAVEAQRCVPIVHRVLDLGEVEAGLIEIDSAVLVADEEQNLADKPTRDNSVNAIGGVLAGTMN  
MGANLDAVERGSNIIIELEEEQYHAVNGANDGAKMTDAVLMVLSMAYFPVIAGFGSANALDRGVFD  
LLISAPGDADNLDHGGQMSIPAATIHTETTPLYAEAEIDRIAWIAPMHLLGTLAAVLGFEPDHYSFISM  
MIDASLDITETAEVL-  
DYHILERGARPPSFRKILIKGLHIRLLAAVGTILVVGSGRSEITAYIQGRAVPITLNKATFLPAFAPSSCKV  
VDIFSTLLRPPERSTVMMMLILETVTEL-  
LDVTRLENDKLERMAILLPGLDMAQLMDLLAAQDFADIVTIDAAITAILSVAEEAVVLREMLLTAEI  
AINALALALALLMLTADNGLTQKERAREAQLKD LIQAGAVLQVHADDAMVLAATADKVRLDTDEG  
TTSASFASLNLATVSDGFYVLSSAVLQMSSDLMMIVAVSRVLADKEHKNALVVRHPEQVKTPQTYAEG  
SPGMVLQTLTDCIPPLAVKAQAIELLWTLVVALWRVKAHLASAMRPRRERILVLILALGLIVVLLQSEGG  
GMGGG-  
MGAAAKILAAFSILT KASAGDEV RKVTRRVMDLNSRLGRPEEAVNPEFRGEELEQTKYEAENVEVDT  
VETIRRFVDIPFLVSTRTQHNESEDRGARMVLDVTRVRFDL-  
VTKRSEIILAARAETDGIISRQMAKDLQALHPEAAA L GKVSFAHEFIALNDGHISNYVTAEINSVLGMLL  
LVLFIQQVRVAKVWWPTRREVTMVFMMAALGLFVLVIGLGVNLVFMVGGISPLQITTLVLGEGVMAVR  
QVSTFPAES-  
VTILQNTYADLICAGRVTKADIENSLHIVVGARVARGTWYVIYHYEISQAQGPAGIMQRAFRQATLSK  
SLIDGRMEVKIKVVTSDRYA-  
TYEIKGGQHRKGTRYNRVKVGHNIPVDLLARIKMAFQPPNLVLVKTFGAVVQKRFAQQLTHMRHGA  
VTIGPMEVSSPYIRSKKARHAPGDSVVDIKPDNIVRSVAVVPELIWARENEDQSAVHEKYVKVTHKIAA  
KRSTAVDKAQYDKRNQVHLSFIGLAVKVLDPKA-----  
--  
RMRPQLNLAGRTDNKIVKCLNNNLDDVEYGKMGRRKIKPLTIKSVYDVESKHATELVKLMPYKDDVE  
GRKSQFAEK--  
ALFEPLKAFMMVFGFIARSVYALYLRVIRRTILLVKT KVVVNANTVLSAIIIGVSIRLRHKSTNIAETKHHI  
KTIEARARMTLAGTPSVKLHLRDGRIGTKGGRIKGYMPYKNFNIFDKLESGRRAKVKELAKKKVDKTIA  
VDGIRTRQQGGRIKPAQLSNALANTRVGVDIVGENVQQESNPRANAEMGQIFAAIDARVYHLVAAL  
IGHALTAVLALCAILGIGRAHTLLAVRLKMNAGIELHSAA-VTEAVAAA-YAQPGGEA-  
AVADASEAYLGD LTVTEASLEVCR LRRRQLGE-----  
RHGIKAKGTFGKERAMMQITPTKPVKVVVPVFGEDELLAPIRAFAETNGDGVTVKLIKDVKVTMFE  
KAVASLAIAGKFTSIVYTVLEKVTELMKDIIYEQRAKAHYGRGRLRSHVVTHTKSKRHL SMMRRTVVAD  
PRMDAARLTNGEVAVITGATMAFVMSEQDAV--  
GDVDMHFHEEPRREAQLGIAGPETFLATEQPRLLALLFLREYLIHIVDIGTVGGFADAATIYDILRAMHN  
KLDRLSAEIAKTRMCLSDDVADMGVTDLAARRDSAGDAIL SAYWINGVTANADIILLVANMECKTA  
PENIDCAVRLFYQRVTLQAKERGGDISVELVPAQNQIEAAEGTVIYTIKGKTPSTAQMKNIEGISRSIVK  
SLAVQLFQVKLFLNDTWIATLLRAANNVVYVDAREGKEAVDHVVERD TDLEFAPQRDIVARKIRIYTP  
AAPSAVVIWDP AIEREDKADAQGTILMIYGPDLQDISCFTDIGSEP KIESLKS WDEKEYV VHRDDIPED  
I-  
TLVGKSSKVNKEFGIPDVAVCAPAKPGVTESIDRGEPKAGSCGEVANLPYPQVSLVNRVSSANVQKNI  
SMVLGGHPVGEMGISRAIERHLETNMCEIFVDMAEVDVALDFYKIALTSLRVGLDPPNAKVQIDGKES  
RKLMAILDGGAE LQRHPKVSEESGIG-QAGSKAKLPDDTLILDGVQHGDIKFTNTDLPEGRV-  
VTPVNNAVKAQLEIDKVL MKTFHVVTLSFSNNKGEEHLIKLRLNALKKSTRHYEMLLKIRDTECADSPH  
AIPVGKILKIDALLQ TICQAHYTAIEPLLAEDLTALGVMGDQGLLHVVPRLMILAVLHICTLEAQALLPH

WSLQQKALVTDQTMGLPLRDRDWSF-AISEVVGNTFFARTKGDDTEERLHARNPI-IVL-YGKAGIL-  
ISPSGLRLDSTRDSPQEHGNEDQLILSTERLQDAMGYFILRVLLVFVDQMILAYGSGDDPLKFLVADQ  
AVTGRTPNPQLVCLTRRTFPLDLQRDATFVLVLEDSTMKNLSHKMKHMHMNLVLVSKGWVENVSTKILI  
SDQAIASYAEDAGAHTQPSESALAVITSRVMAPIVLVVSQKPSAPSKTLFLEALNLLDEVTATVLNPKP  
RYFIFEGDVISVLASLDAAVLLGMQRPQPDRLRRAVVARAIRLAIAIRGSGVLAALLEGHRHINFSRAVTC  
R--YPTLEAARSPAIT-HAAEFRVRNHKVSTKRARPYKGHTKFLHKAETEKALIAEGVDIA  
>GCA\_000473325  
AVIKPVEINKYAPVLMIRQQQVATVSGAGSPSLRAKTVYAKSGLQRKTMTKWVAKPIYF-  
GVLKMGNIVQLVSISVDSRAVCTVAQVVEQEVVHGLVALDAVKRKIALEAMGGMTTEDPAKVAEF  
EDEIDLKRFRDADARADMLPVMLGLTLEIKFDPHEPVVHDLAVPVIYEVI-  
GIMADKGGIEVDDCAISNAVSDVDPIAYVSPIDLEAVAGTEMAFIDQEA AVAAARETIALEELALEAGIL  
VVGIKPLLLPV-FGEEGDV-MSFAARSRTLGSIVALAVAYPELTRA-IDG-IASEM-  
MAAAQAAAALAEKRGTAEEIRIVKRMQRSSGLADDPELVILEDAAEGNSSWAGQIYDDPVSGSSES  
AGNIVHAANKRQNFARSITFLRKVEISDKAAAPLMRGVKHNSKSRSAKLDDAIAGLNFPNVPPGIAIR  
AEAGKPADRLLHDAAEGELIMIVVRWHVTWKTAVVIALVYQAEDLVGLIELGGIAAVGRPDGILNRH  
HKLNGSLIEQRPIVEKLTLRRAALKEKLGKDQVIIFVVKVQGDLVADATIQMG-  
GPVGAVVAIQGELIFVRRHKQTVITDQEATV-VLKGVAEGPADAQALLRIRVTHTLVGLSVLLIPE-  
PVLVESVQIREGVGKSLQIIQLDVYLLRDMGTGEETLAESKSRELIREVLAVDPITGVRLAFGKLKERMGK  
KLGLKDLETML--  
LSILAAVTEPRMENLPEGVCRNFIAAGPAAAVGMLFLLDDAGKLYQIDGDMRELTKSVKSLIGLVDSK  
APKVL SAGYAEERL-----  
IIFALSLKGGHRRRTMMALGVMLAAAIIESQA EKGEVHHDTPDILLDDAEVVGTSIMLSRQASLDLKQIS  
KVDVIVLFPFEQEKMVVSLKFFCTEVAIFVIALITTVGEMLSREPEHAQEEGAGFQKRIRGHSMLFALAV  
VFDRRNCRDA-LPDLFLGLGLAEPRYGILYTNQPKKKQMPSEPDGDRVDGFELVHAVKEDGAS-  
HELEMPEAMALAVEAGETINLSAGVLAMNGGMVAVEKVDSKRKVALAATKWNISRLKIADVHISGA  
APVRSCG-  
IEQAGLSAALEGKKVWFLFLPGASNAEEEEKLDGAGASTADAAADKQIHILLVKPVLVVIQDSNSAGL  
ISNGGLDEWGT MAYKKHYAFAARMRLHMRTID-----  
MAPNKQKSEKVKTVKLEGDTRFRQLATEGVKEQMP-LHALNP DFAV-  
LPLLVT PAVGSVAADENVLGADVPVDASL-  
RELQKSQKGSALPITAIRLLAMRAARGMIEEDIMVAGKVAA-  
LLKIRALETVIQILLRNDSEATLPWRLSVAEKLEADTKRASGFAARPFKTKPSLCNTQAHSKIADPIQEIA  
AGYVALEERFVFPVEDIAIRLILANPHSRVEEKKRGEGHLMGMAKELLAKAVVMLRNEPGTNTTEGLLN  
YLTTNQPTDLLFEDCLDVIIDIRMSVV-----  
VHLNTV-  
HVVVAGVRDVGDYEIMSARFPSGLVQVEQVDDRTGREKTLMW MYGAMEELWLMSVRWADWVP  
DCEIGAIILHVYAQEINRAFSLKRLQLDGPWKEARWWNTWQLWLNKDGFFGYEAAFRVVKQVLKA  
TLFDFEMSNVEGVGRYQSKQELRVGYRIRQQVEFARLDPRTDILLQAQTRLSIRHALEVVAIILRDVA  
PEFTLVVAYQDVARGHVECVLAESFDFTEKNAHIGPVGLRTPASIFGDGTVLKEAVLGKIDLANTVAEF  
RYLVILDGGRALGVEWISL-NMLYARIWLPPAQAALKNLLPICFFLQHPELDLEGL-  
MLFDGISKARADKLMAGALVEEILEGVARFADPEATTHQSKKAKHFKYYGEEVDPVHLAYILEVFALVS  
TQVVVSDRLLKDRYVLNLKVFRGFTALWWMALQLSPKGPSATVITVGTIAGLGALVLFILL-  
RDSVLVETLYRYVY--MKG YEAAKDVQDADPEHLGQLAAASRDIEWIEVIPAFFYYFKTAK-  
FEPFNTAVAKEFFGLFEERLRIIDVLAVPPDRVAALVEFVALAGTLATSAEALVGVIACGLCEPNAAEVLE

AERDWNHLHRSMGITLAFFEARESVKGYFDKGLHKDVAEIGLSEAGALTTHFRCDVDAKQIAPAVHRTL  
DLGEIEAALIEIDSAVVVADEEQTLADKPTRDKSVGAIGGVVLAGTMNMGANLDSVERSGNIIIEEEE  
QYHAVNGKKADGKLTDKVLMVLSVTYFPVIRRFASANALDRGVFGLLIDAPEDADNLDHGREMTPA  
PSVLAETTPLYAESEIDKIAWIAPLHLLGTLPAVLGFEPDFQGFISMMIEASLEIMETAEVLDYHVLERG  
SRPPKFRVILIKGLHIRLLAAVGTLVVGSAGRTEITAYIQGQAVPISLSKNTFLPAFSPSSCKAVDIFSTLLR  
PPERSAVEMLILETVael-  
LEVTRGSNDKLERLLVLLPGLDMAELLELLAAAQDFADIVTLGAAITAILSVAAESVVLREMLLTkAEIAIT  
ALALAIALLMLTGDEGLTQKWQARGAQMKELIQAGAVLQIHAADAMVLAStADKVRLDTDEGTTS  
AFASLNLATVSDGFYVLSSAVLQMSSDLMMIVSVARVLADKESKNALVVRHPEQVKTOPTYAEGSPG  
MVLQTLTGCIPLAVKPEEVELLWTLVAALWRVKAHLASAARPHNERVLILLALGLIVLLQSEGGGM  
GGG-  
IGAAAKLLAAFSILTMKAAVGDEVrkVTRRVMDLSSRLGRPEEAVNPEFKGEELDQTKYEAENVEVDC  
METVRRFVDIPFLVSVRTQHNESEDrgARLVLDVSRVRFIDL-  
VTKKSDVILVERVETDGIAREMAKDMQSLHDEAAALGKVSQlQHfIALGDAHISNYVTAEAHsvLG  
MLLLVLFiQQVRVSKVWVPTRRVtmVFIMAALALFFLVIGLGLNIVFMVGGISPLQITTLVLGEGVMA  
VRQTSTFPAES-  
VTILQNTYADLICAGRVTKADIEKSLHIVVGARVARGTWYVIYHYEITQAQSPAGIMQRAFRQATLSQS  
LIDGRMEVKIKVVTSDRYA-  
TYEIKGGQHRKGTRYNRVKVGHNIPVDVLARIKMAFSPPNLVLVKTFGAVVQKRFAQPLTHMRHGA  
VTIGPMEVSSPYIQSKKARHAPGDSVVDIKPDNIVRSVAVVPELIWARENEDQSAVHEKYVKTTHKIAA  
KRNRAVDKAQYDKRNQVHLSFIGLAVKVLPEQAIVHATAGTLLPTESVSVTENLKGVAATIRLDPMEK  
ALIAYIKMRPQLNLQGKTDNKIVKCLNNNLDDEWVGKLGRRKIPITIKSVYDVEHTRATELVKLMPY  
KDDVEGRKSQFAEK--  
ALFEPLKAFMMIFGFIARAVYALSLRVVRRtILLVKTIVVNAETVLSAikiIGVSIRLRHKSTNIADTKHHIK  
TIEARARMTLAGAPAVKLHLRPGRVGKKGGRIKGYMPYKNYNIFDGLASGRRAKVADLAKLKKVDKTI  
AVEGIRTRQ-  
GGRLPKADLSNALSNTRVDEVVGENVQKASNPRANAEMGQIFAaidARVYSLVAALIGHALEALLA  
LCVIMGIGRAHALLAVKLKMNAGIGMHSAa-VAAAVAAA-YSQPGGEA-  
AIADVSEGDLGALAISESSLDVCRLRRRQIG-  
LKKTKKEAYMSLTCFSGKGDVKIIEATQTQAYEIVATRTAERHGIHAKGTYGKERAMMQITPTKPVKV  
WVPVfVSDEELLAPVRAFAETNGDGDVVKLSNDVKITMFEKGVASLAVSGKNTTVVYTVLEKVELA  
KDIIYEQRAKAHYGRGRLRSHVVTHTKQKRHLsMMKRTTVADPSMDAARLSDGEVSVVTGATMAFV  
MSEQDAV--  
GDVDYHFHEEPRREAQLGIAGPETFLSTEQPRLLAMlFLREYLIHIVDIGTVGNFADAATIYDILRAMQN  
KLDRKLSADIAKVRMCLHDDVENMGVTAEAPRRDAAGDSILSAYWINGVTANSdIILLVANLECKTAP  
ENIDCAVRLfYQRITLQAKERDGDVSVKLVPAQNQIEAAEGTVIYTIKGTNPSTAQMKNLVEAISRSIVK  
SLALQLFQVDVFLNDTWIATLLRAAQDVVFDAREGKEAVDHVIERDTELEMAPQKDIVARKIRVYTP  
AAPSavVIWDPaIEREDKADAQGTILMIYGPDLQDISCFTDIGAEPKIESLAawDEKEKYVVHRDDIPE  
DI-  
TLVGKSSKVNKEFGIPDVAVCAPAKPGVTESIDRQEPKAGTCGEVANLPYPQESLVNRVSSANVQKNI  
SMVLGGHPVGEMGISRGVERHLETNMCEIFVDKPDIDVALDFYKIALtALRVGLDKPNAKVEIDGKES  
RKLMAVKDGDASLQRHPKVSEESG--RKAGEKAKLPDDALIYDGVQHGDVKFTATDLPEGRV-  
VTPVFMSVKAQLEIDKVMLKTFHVVtLSFSNEKAEEHLIKRLNALKKSTRHYEMLLKIRDTECAQSPHA  
IPVGKILKIDALLQTICKAHYTAIEPLLAEDLTALGVMGDQGLLHVVPRLMII--

LHLCELGAAAAIPQWQLQQAAILTDQTMGLAVRERRWSF-  
AISEVTGNTFFARTKDDDEQRLHARNPI-VIL-YGKEGML-  
ISPSGLRLASTAPSDKGHGNDKILSPERLQDAMYYYVLKVLLVFVDEIILAYGSGEDPLKFLVAHQAV  
TGRENQQLVCLTRRTFPLDLQRDATFVLVLADTTMKNLSHKKMHMNLVLVKPKSWVENVSTKILISD  
QAIASYAEDAGAHTQPSESALAVITSRVIPIVLVVSQKPAAPSKTLFLEALNLYDEITATVQKRPKRYFIF  
EGDVVSVLGTMDAAVILGMQRPQPDRLRAVTAIRLAIALRGSGLLASLEGGAINFSRAVDFA-  
TYPGLEAA-GLAIV-EALDFRVRNHKTSTKRDRPYKGHTKFLHKAEEKALIAEGVDTIA  
>GCA\_000511355  
AVIKPVEINKYAPVLMIRQQEVATVSGAGSPALRAKTVYAKSGLQRKTLTKWVAKPIYF-  
GVLKMGNIQVLVSISVDSRAVCTVAQVVEQEVVHGLVALDAVKRKIALEEMDGMTTEDPAKVAEFE  
AEIDLKRFRDADARADMLPVMLGLTLEVKFDPEHPVVHDLAIPVIYEVI-  
GIMADKGGIEVDDCAISNAVSDVDPLAYVSPIDLEAVAGTEMAFIDQEA AVAAARETIALEELALEAGI  
LVVGI-PLLLPV-FGEDGSV-MSFAARSRTLKSIVALAVAAEELTRA-IDG-IASEM-  
MAAAQAAALAEKRATAEEIRIVKRMQRSSGLADDPELVILEDAAEGNSSWAGQIYDDPVSGSSES  
AGNIVHAANKRQNFSSITYLRKVEISDKAAAPLMRGVKHNSKRSARKLGDAIAELNFPNVPPGIAIR  
AAAGKPGDRLLHEAAEEELL-  
IVVRWHVTWKTAVAIALVYQAENVVGLIALGGIAAVGRPDGILNRHHKLNGSLIEQRPIIEKMTLRLRA  
SLKQKLGKDQIIIFVVKVQGDVADATIQMG-GPVGAVVAIQGELIFVRRHKQTVITDQEATV-  
ILKGVAEGPADAQALLRIRVTHTLVGLSVLLIPE-  
PVLVEAVQIREGVGKSLQIIQLDVYLLRDMGTGEETLAESKSRELIREVLAVDPITGVRLAFGKLKERAGK  
KLGLKDLET----  
QSILAAVTEPRMENLPEGVCRDFIAAGPAAAVGMLFLLLEAGKLYQIDGEMRELTKSVKSLIGLVDSK  
APKVL SAGYAEERLRIRFADCEVLGTDANLYPYKEERRELLRMVPVYLINA AKRRQLIIFALS LKGGHRR  
MMALGVMLAAAIIESQAENGAVHHRAP EILLDDAEVVGTAIMVSRQAALDLKQVGKVDVIVIFPEFQ  
EKMVVSLKFFCTEVAIFVIALITTVGEMLSREPEHAQEEGAGFQKRIRGHSM LFALAAVFD RRNCRDA-  
LPDLFLGLGLAEP RYGILYTNQPKKKQMPSEPDGERVDGFELVHAVKEDATS-EEEMPEAMALAVE-  
DATINVSAGVLAMTGGMAAVEKVDSKRKVALAATKWNISKLELVDVHISGAAPVRSCD-  
IEQADLSAALGSKVWFLFLPGASNAELEEAKLDGAGASTADAAADKQIAILLVKPVLVVIQDSNSAGL  
ISNGGLEEWGTMAYKKHYSFAARMRLHMRTID-----  
MAPNKQKSEKVKTVKLEGDTRFRQLAIEGVKEQMP-LHALNP DFAV-  
LPLLVT PAVGSVAADERVLGAKVPVDASL-  
RELQKSQKGSALPISAIRLLAMRAARGMIDEDIMVAGKVAA-  
LLKIRALETVTAILLRNDSEATLPWRLSVAEKLEADTKRASGFAARPFKTKPSLCNTQAHSKIADPIQEIA  
AGYVATEARFVFPVEGVAIKLILSNPHSRVEEKKRGGEGLHGMAKELLAKAVVMLRNEPGTNT EGLL  
NYLT TNQPTDLLFEDCLDVIIDIRMSVV-----  
VHINTV-  
HVVVAGVRPVGDYEIMSAKFDSGLVQVEQVDDRTGREKTLMW MYGAMEELWLMSVRWADWVP  
DCAIGAILHVYAQEINRAFS LKRLQLDGWPKAARWWNTWQLWLNKDGFFGYDAAFRAVKQVLK  
AALFDFEMS NVEGVGRYQSKQELRVGYRIRQQVEFARLDPRSDILLQAQTRLSIIRHALEVVA IILRDV  
APEFT-  
VVAYQDVARGHVECVLADSFDFTEKNAHIGPVGLRTPATIFGDGTVLKEAVLGKIDLANTVAEF RYLV  
LDGGRALGVQWISL-NMLYARIWLPPAQAALKNLQPICFFLQHPQLDLAWQ--  
LFSGISKTRAERLMAGALVEEILEGVARFADPEATTHQSKKAKHFKYYGEEVDPVHLAYILDLFALVATQ  
VVVSDRLLKDRYVLNLKVFRGFTSLLWLALQLSAKGPSATVITVG TIAGLGALVFIILL-

RDSVLVETLYRYVYG-MKGYEAAKDVQDADPEHLGQLAAASRDIEWIEIIPAFFYYFKTAT-  
FEPFNTAVAREFFGLFKERLRIVEVLAVPPDRVAALVEFVALAGTLATSADT-VGVIACG-  
CEPNAAEVLAEERDWNLHRSMGITLAFFEARDSVKGYFDKGLHKDVAEIGLSEAGAFTHFRCDVDA  
KQVAPSVHRTL DLGEIEAGLIEIDSAVVVADEEQTLADKPTTRDKSVGAIGSVLAGTMNMGANLDSV  
ERGGNIIIEEEEQYHGVNGKKADGKLTDKVLMLSVAYFPVIKRFASANALDHGVFGLLIDAPPDAD  
NLDHGR-  
MTIPAPTVAHAETTPLYAESDIDKIAWIAPLHLLGTLPAVLLFEPDFQGFISMMIDASLDIMETAEVLLDDY  
HVLEKGARPPKFRVVLKGLHIRLLAAIGTLLVVGSA RTEVTAYIQGQAVPISLRKHTFLPAFSPSSCKA  
VDIFSTLLRPPERSVQMLILETVAEL-  
LEVTRGTNEKLERLLVLLPGLDLAELLGLLAAEDFADIVTLGAAITAILSVAAEAVVREMLLTAEIAIT  
ALALAIALLMLT-  
AEGLTQKWQAREAQMKELIQAGAVLQIHASDAMVLA STADKVRLDTDEGTTSAFASLNLATVSDGF  
YVLSSAVLQMSSDLMIMIVAVARVLADKESKNALVVRHPEQVKTQPTYAEGSPGMVLQTLTDCIPPLA  
VKPEEVELLWTLVAALWRVKAHLASAARPHNERVLILLALGLIVLLQSEGGGMGGG-  
ASAAARLLAAFSILT LKASVGDEVKVT RRVMDLSSRLGRPEEAVNPEFKGEELDQTKYEAENVEVDC  
METVRRFVDIPFLVSVRTQHNESED RGARLVLDVSRVRFIDL-  
VTKRSEVILVERVETDGIAREMAKDMQSLHDTAAALGKVSQ LQHFIALGDAHISNYVTAEAHSVLGM  
LLLVLFIQQVRVSKVWPTRREVTMVFIMAALAVFFLVIGLGLNIVFMVGGISPLQITTLVLGEGVMAV  
RQTSTFPAES-  
VTILQNTYADLICAGRVTKADIESSLHIVVGARVARGTWYVIYPYEITQAQAPAGIMQRAFRQATLSQS  
LIDGRMEVKIKVVTSDRYA-  
TYEIKGGQHRKGTRYNRVKVGHNIPVDVLARIKLAFAPPNLVLVKTFGAVVQKRFAQPLTHMRHGAV  
TIGPMEVSSPYIQAKKARHAPGDSVVDIKPDNIVRSVAVVPELIWARENEDQSAVHEKYVKTTHKIAA  
KRNRAVDKAQYDKRNQVHLSFIGLAVKVLPEQAIVHSTAGTLLPTESVSVTENLKGVAATIRLDPMEK  
ALIAYIKMRPQLNLQGKTDNKIVKCLNNNLDDEWVGKLGRRKIPITIKSVYDVEHERATELVKLMPY  
KDDVEGRKSQFAEK--  
ALFEPLKAFMMLFGFIARAIYALYLRVIRRTIVLVKTIVVNAETVLSAIIIGVSIRLRHKSTNIADTKHHIK  
TIEARARMTLAGAPAVKLHLSPGRVGKKGRIKGYMPYKNYNIFDGLASGRRAKVADLAKLKKVDKAI  
AVEGIRTRQ-  
GGRLPKADLSNALSNTVRDVEVVGENVQEASNPRANAEMGQIFAAIDARVYSLVAALIGHALEAVLA  
VCAIMGIGRAHALLAVY-EMNAGIGMHSAA-VAAAVAAA-YSQPAGEA-  
AIADVSEGD LGALAISDSSLDVCRLRRRQIG-  
LKKTKKEAYMSLT CFSGKGDKV KIEATQTQAYEIVSTR TAERHGIHAKGTYGKERAMMQITPTKPVKV  
WVPVFVTDEELLAPVRALAETSGDGVAVVKLASDIKITMFEKGVASLAVAGKNTTVVYTVLEKVTELAK  
DIIYEQRAKAHYGRGRLRSHVVTHTKQKRHL SMMKRTVVADPSMDAARLSDGEVSVVTGATMAFV  
MSEQDAV--  
GDVDFHFHEEPRREAQLGIAGPETFLSTEQPRLLAMLFLREYLMHIVDIGTVGDFAEAA TIYELLRAMQ  
AKLDRKLSADIKVRMCLHDDVEDMGVKA EAPRRDAAGDAILSAFWINGVTANSDIIMLVANLECKT  
APENINCAVRLFYQRITLQAKERDGDVSVKLVKAQNQIEAAEGTVIYTIKGKTPSTAQMKNIESISRSIV  
KSLAVQLFQVDVFLNDTWIATLLRAAQDVVFVDAREGKEAVD HVIERDKELEMAPQKDIVARKIRVYT  
PAAPS AVVIWDPAIEREDKADAQG TILMIYGPLDQDISCFTDIGAEPKIESLA AWDEKEYVVRDDIP  
EDITTLVGKSSKVNKEFGIPDVAVCAPAKPGVTESIDRGE PKAGTCGEVANLPYPQESLVNRVSSANV  
QKNISMVLGGHPVGEMGISREVERHLETNMCEIFVDKADIDVALDFYKIALTPLRVGLDKPNAKVEID  
GKESRKLMAVKDGEARLQRHPKVS AVSGTR-

KAGEKAQLPDDALMYDGVQHGDIFTATDLPDGRV-  
VTPVFMSVKAQLEIDKVMLRTHVVTLSFSNEKAEHLIKRLNALKKSTRHYEMLLKIRDTECAQSPHA  
IPVGKILKIDALLQTICQAHYTAIEPLLAEDLTALGVMGDQGLLHVVPRLMILAVLHLCGLEAAEAAISRW  
QLQQQAILTDQTMGLAVRERESF-TISEVTGNTFFARTKDDDTVERLHARNPI-VIL-YGKEGML-  
ISPSGLRLASTAPSDKGHGNDKILSPERLQDSMYYYVLRVLLVFVDELILVYSGGESPLKFLVANQAV  
TGRDNPQLVCLTRRTFPLDLQRDATFVLVLADTTMKNLSHKKMHMNLVLVKPKSWVENVSTKILISD  
QAIASYAEDAGAHTQPSESALAVITSRVIPIVLVVSQKPAAPSKTLFLEALNLYDDITATVQKRPKRYFI  
FEGDVISVLGAMDAAVILGMQRPQPDRLRRAVTARIRLAIALRGSGLLASLEGGAINFSRAVDFAA-  
TYPGLEA--GLAIA-EALDFVRNHKTSTKRDRPYKGHTKFLHKAEEKALVAEGVDTIA  
>GCA\_000511385  
AVIKPVSLNAYAPVLMIRQQEVATVSGAGSPSLRAKTVFRKSGLQRKTMWKVSKLYF-  
GVLKMGNIQVLVSISVDSRAVCTVAQVVEQEVVHGLVALEAVKRKIALEEMDGMTTEDPAKVAEFE  
AELDLKRFRDADARADMLPVMGLTLEIRFDPHEPVVHDLPIPVIFEVI-  
GIMADKGGIEVDGCAISNAVSDVDPISYVSPIDLA AVAGEQMAFIDQEA AVAAARDAAIEELALEAGI  
LVVGISPLLLPV-FGEDGGV-MSFAARSRTLGSIVALAVAYEELTRA-IEA-IASEM-  
MQAAQAEALAEKRGTAEEIRIVKRMQRSSGLADDADLVILEDAAEGNSSWAGQIYDDPISGSSES  
AGNIVHAANKRQNFARSITFLRKAESDKAAAPLMRGVKHNAKSRTARKLDDAITELNFPNVPPGIAIR  
AAAHKPVDRLHLDATEREQILMIVVRWHVTWKTAIAIGLVLTAGDIVGLMELGGIAAVGKPDGALNR  
HHKLNGSLIEQRPIIEKMTLRLRASLKEKLGKDQIIIFVVKVQGDLVADATIQMG-  
GPVGAVVAVQGEVIFVRRHKQTVITDQDATV-VLKGVAEGPADAQALLRIRVTHTLVELSVLLIPE-  
PVLVDSVSIREGVGKALQIIQLDVYLLRDMGTGEETLAESKSRELIREIFALDPITGVRLAYGKLKERM  
KLALKELD-----  
RSILEAVTEPRMENLPAGVCRTFITAGPRAAVGMLFLLDDGGKLYTIDGDMRELPSVKSILGLVDAK  
APKVL SAGYAEERLRIRFADCEVLVTEADLYAYKEERRELLRMVPVYIINEAKRRQLIMFALS LKGGHRR  
TMMALGVMIAAAIIESQAEGSVHHKAPQVLLDDAEVVGTAIMISRQSALDLKQMVKVDIIVLFPEFQ  
EKMVVS LKFFCTEVAIFVIALITTVGEMLSREPEHAQESGAGFQKRIRGHSVLFALA AVFDRSNLRDT-  
TPDVFLSLGLAEPRYGVLYTNQPKKKQMPSEPDGDRVDGFELVHAVKEDGSS-  
QELEMPEAMALAVE-  
DATINVSAGVLAMNGGMVAVEKVDSKRKVALAATKWSIAKLSIVDITISGAAPIRCCG-  
IEMADISAALGKKKV-  
FLFLPGASNAELEEELDGAGASTADAAEDKQLSILLVKPVLVVIQDSNSAGLISNGGLDEWGT MAYK  
KHYSFAARMRLHMRTIDAIEVGVQMEPNKQKSEKVKTVKLEGDTRFRQLAIEGVKEQMP-  
LHALNPDFAV-LPLLVT PAVGSVAADERV LGADV PVDASL-  
RELQKSQRGSALPITAIRLLEMRAARGMIEEDIMVAGKVAA-  
LFKVR ALETIVALLRNDTEATLPWRLSVAERLEADTKRASGFAARPFKSKPSLCKTQAHSKIADPIQEI  
AGYVAAEERFVFPVEDIAIKLILSNPHSRVEEKKRGEGHLHGMAKELLGKAVVMLRNEPNTNTEGLL  
NYLT TNQPTDLLFEDCLDVIIDIRMSVV-----  
VHLNTI-  
HIVVPGARDVAAFTIMSATFDSGLIQVEQVDDRTGREKTLMW MYGAMEELWLN SVRWADWVPNC  
AIGAILHVYAQTINRAFSLKRLQLDGWPKEARWWNTWQLWLNKDGFGYGYDAAFR-  
KQILKATLADFEMKDVEGVGRMLSKQEV RAGYRIREQVEYARLDPRTDILLQAKTRLSIIRHALTVVAIL  
LRDVAPEFTVVVAHEDVARGHVEC VLAESFDFTEKDAHIGPVGLRTPAGIFGDGT V FKEAVLGKIDLA  
NTVADFRYLILVDGGRALGVCWISLTNLLYTRIWLPPAQADLKDLLPICFFLQHPELDLE MW-  
GLFAGISKARADQLMAGALVEEILEGIARFAEPEATTHQSKKAKHFKYYGEEVDPVHLAYILELFALVST

QVTVSDRLLKDRYVLNLKVFRGLTALWWLSLQLAEKGPSATVITVGTIAGLGALVLFILLMRDSVLVET  
LFYRYVY-VMLGYEAAKDVQDADPEHLGPLAAASRDIEWIEIIPAFFYYFKTAT-  
FEPFNTAVAREFFGLFKERLRIVDVLAVPPDRVDALVQFVALAGTLATSARA-  
VGVACGLCEPNAAAVLEAERDWNLHRSMGITLAFYDARKSVKGYFDKGLHKDVAEIGLREADALTT  
HFHCGAEAKRVAPAVHRVLDLGEIEAGLIEIDSAVVVADEEQTLADKPTTRDKSVGAVGGVVLATM  
NMGANLDSVERGGNIIIELEDQYHAVNGKKADGKLTDKVLMVLSAAYFPVVTRFSSANALDRGVFG  
LLIEAPTDADNLDHGGSM TIPAPTVLTETTPLYAESDIDRIAWIAPMHMLGTLPVLTTFEPDHYSFISM  
MIDASLEIMETAEVLDDYHVLEKGARPPAFRVLIKGLHIRLLAAVGTILVVGSAAGRAEVTAYIQGRAVPI  
TLRKHTFLPAFSASSCKVVDIFSTLLRPPERSVEMLILETVAEL-  
LEVTRLTNEKLERMMILLPGLDLAALLGLLAAAEFATIVTLGAAITAILSVAAESVVLREMLLTKEAIAIT  
ALAMAMALLMLTGDEGLTQKWVGREAQMKELIQAGAVLQIHADDAMVLAATADKVRLDTDEGT  
TSAFASLNLATVSDGFYVLSSAVLQMSSDLMMIVSVARVLADKESKNALVVRHPEQVKTQPTYAEGS  
PGMVLQTLTECIPPLAVKPEEVELLWTLVAALWRVKAHLANAARPHNERVLILLALGLIVVLLQSEGG  
GMGGG-  
MGAAAKILAAFSILTALKASVGDEVKVRVMDLSSRLGRPEEAVNPEFKGEELDQTKYEAVNEVDC  
METVRRFVDIPFLVSVRTQHNESEDGRARLVLDVTRVRFIDL-  
VTKRSDVILVERVETDGIARQMAKDMQSLHPEAAALGKVSQQLHFIALGDAHISNYVTAQTHSVLG  
MLLLVLFIQQVRVSKVWVPTREVTMVFMMAALAVFFIVIGLGINLVFMVGGISPLQITTLVLGEGVMA  
VRQVSTFPAES-  
VVILQNTYADLICAGRVTKADIESSLHIVVGARVARGTWYVIYHYEISQAQSPSGILQRAFRQATLSQSL  
IDGRMEVKIKVVTSDRYA-  
TYEIKGGQHRKGTRYNRVKVGHNIPVELLPRVKMAFGDPNLVLVKTFGAVVQKRFAQQLTHMRHGA  
VTIGPMEVSSPYIKSKKARHAPGDSVVDIKPDNVRSVAVVPELIWARENEDQSAVHEKYVKTTHKIA  
AKRNRADVKAQYDKRNQVHLSFIGHLAVKVLPEQAIVHATAGTLLPTESVAVTENLKGVAATIRLDPME  
KTLIAYIKMRPQLNLGGKTDNKVKCLNNNLDDVEYGKLGRRKIKPITIKSVYDVEHKQATELVKLMP  
YKDDVEGRKSQFAEK--  
ALFEPLKAFMMIFGFIARAVYALHLRVVRTILLVKTIVVNAENVLSAIIIGVSIRLRHKSTNVADTKHH  
IKTIEARARMTLASAPSVKLNLRPGRVGKKGRIKGYMPYKNYNIFDGLSSGRRRAKVKDLAKLKKVDKT  
IAVDGIRTRQ-  
GGRLPKAQLSNALANTRVGVDIVGENVQEASNPRANAEMGQIFAAIDARVYSLVAALIGHALEAVLA  
ICAIMGIGRAHALLAVY-KMNAGIELHSAA-VAEAVAAA-YSQPAGEAAAL-  
DVSEYPLRALAVTDQSVDVCRLRRRQLGELKKTKEAYMSLTCSGKGDKVKIVEATQTQFYEIVATRT  
AERHGISAQGTYGKERAMMQITPTKPVKVVVPVFNDDPELLAPVRAFAETNGDGIDVVKLTTDIKVT  
MFEKGVASLAIAGKATTVVYTVLEKVTLSKDIIYEQRAKAHYGRGLRSHVVTHTKQKRHLSSMMKRT  
VVADPSMDAARLTDGEVSVVTGATMAFVMSEQDAV--  
GDVDMHFHEEPRREAPLGIAGPETFLSTEQPRLLALLFLREYLLHIVDIETVGNFADAATIIDILRAMQN  
KLDRKLSADIAKVRMCLSDDVADMGVTDVAARRDSAGDSILSAYWINGVTANSIDIILLVANLECKTA  
PENIDCAVRLFYQRITLQAKERGGDVSVLPAKNQIEAAEGTVIYTIKGNPSSVQMKNLIDAISRSIV  
KSLAVQLFQVDSFLNDTWIATLLRAASKVVFVDAREGKEAVDHVVERDTALEMAPQKDIVARKIRIFT  
PAAPSAVVIWDPAIEREDKADAQGTILMIYGPLDQDISCFTDIGAEPKIESLAAWDEKEKYVVRDDIP  
EDITTLVGKSSKNKEFGIPDVAVCAPAKPGVTESIDRGEPKAGSCGEVANLPYPQESVVRVSSANV  
QKNISMVLGGHPVGEMGISRGVERHLETNMCEIFVDKDDIDVALDFYKISLTPLRVGLDKPNAKVDDID  
GKESRKLMAVKDGDASLQRHPKVSEEAGVR-  
KAGEKAKLPDDTLMCDGVQHGDISFTATDLPDGRV-

VTPVFNAVKAQLEIDKVMLKTFHVVTLSFSNDKAEHLVKLRLNALKKSTRHYEMLLKIRDTECAQSPH  
AIPVGKILKIDALLQTICKAHYTAIEPLLAEDLTALGVMGDQGLLHVVPRLMILAVLHLCGITAQMAMA  
QWTLQQIAIVTDQTMGLSVRERDWSF-AISEVTGNTFFARTKDDDEERLHARNPI-VIL-  
YGKEGML-  
ISPSGLKLSSTNPTDANHGNADQLILSGERLQDTMSYHILQILLVFDQMILAWGSGDDPLKFLVAEQ  
AITGRANPQLVCLTRRTFPLDLQRDAVFVLVLEDTTMKNLSHKKMHMNLVLIKSGWVENVSTKILIS  
DQAIASYAEDAGAHTQPSESALAVITSRVIPIVLVVSQKPAAPSKTLFLEALNLYDEITATVLKRPKRYFI  
FEGDVVSVLDHMDAAVLLGMQRPQPDRLRRAVVARAIRLAIALRGSGILAQLEGGVLNFSRAVNFAE  
-TYPLALRAEA-----EFRVRNHKTSTKRDRPYKGHTKFLHKAEDAKALVADGVDTIA  
>GCA\_000526275  
AVIKPVTMNVYAPVLMIRQDEVATVSGAGSPSLRAKTVYRKSGLQQRKMSTKWVASPLYF-  
GVVKMGKIVQLVSISVDNRAVCTVAQVVEQEVVHGIVALEGVKRKIALEAIDGMTAEDPAKVSEFEE  
ELDLKKWRDADDRADMLPILLGLTLQIMFDPHQPVVYDLPIPVIFEVV-  
GIMAERGGIEVDECGISAASVDVPIQYVSPIDLEAVAGTKMEYIDQEAHVHAAKDAIALEELALESVV  
LVVGI-PLLLPV-FAEDAEV-MSFANRSRTLESVVDLAVSFPELVRA-I-EGIASAM-  
MIRAQAAALAEKRGTAEEIRIVKRMQRAAGLADDPDLVILGDAAEGNAQWAGQIYDDPVSGSSESD  
SAGNIVHAANKRQNTARSITFLRKVEISDKAAAPVMRGVKHNSKRSARKVDDSI AVLNFNPVPEGIA  
LRAMAGRPVDTLLHDATEREEILLIVRWHVTWKTAVILVLSVAGDIVGLIELGGVGAVGRPDGVNL  
RHHKLNGSLIEQRPIVEKMTLRLRAALKQKLGKDQIIIFVVKVQGDLVADATVQMG-  
GPLGAVVAIQGDVIFVRRHKQTIVGDQDSTV-ILKGAEGPADAEALLRIRVDHTLVQLTVLLIPD-  
PVLCESVTIREGVGKALQIIQLDVYLLRDMGTGEETLAESKSREVIREVLADPITGVTLAYGRLKERMKG  
KVGLKDLETL---  
LSILAGVTEPRMENLPDGVCRNFIAGPRAAVGMIFLLLDEAGKLYEIDGDLRELLKSVKSLIGLVDAKA  
PKVLSASYATTRLKIRYADCEVLVAEAEYAYKDERRELLRMVPVYIINAAKRRQLILALS LKGGHRRAL  
AALRVMIAAALLESQAEQSTVHHATPAILLED AEVVGTSIMISRQSALELKSARTDVVVVFSEFQEKM  
VVSLRFFCTEVAIFVIALICTVGDMLSREP DHAQETGAGFQKRIRAHSVLFALDATFERSNLQDA-  
TPDLFLGMGLANCYRIGILYVHQPKKKQMPTEPDGDRVDGFELVNAIKEDASKNHELEMPEAMALAV  
EADATINLSAGVLALKGGMVAVERVESKRKMSLAAEKWNIGKISAVDIHLSGAAMIRGTG-  
IELADISAALKTKKVS VLYLLKASNKELEEEKLDGAGSSTANVAEDRQRAILLVHPVLVVIQDSSAAGLV  
ANGGVDEWGT MAYKKHYAFAARMRLHMRTIESIEGVVMEPNKQKAEKVKTVRLEGDTRFRQLAV  
EGIKEQMP-LHALNP DFAVLVPILVTPAVGAVAAQAAVLGARVPCDFSL-  
RELQKSMRGQALPITAIRILGMRAARAMIEEDIMVAGKVAA-  
LLRITALETICALVLRNDSEATLPWRLSVAERLEADTKRASGYAARPFNSKPSLCDTQAHANVADPIETI  
AAGYVAKDQRFVFPVEDIAIQIVLSNPHSRVASAKRAGEGHLHEMAKELLAKAVLMLRNEPDTNTEG  
LLNYLT TNQPTDLLFEDCLDIIDLRRMSVV-----  
IHLNAV-  
HVLISGARDIGDRAIMAAAADSGLVQMEQVDDRTGRERTIMW MYGAMEELWLLSVTYADWVPDC  
TIGAIILHVYAQQINRAFS LTRLQLEGWPPEARWWNTWQLWLNKDGFFGYDAAFRAAVQVLKAAL  
LDFEMTDVNGVGRHQSKQELRVGYRIREQVAYARLDPRTDILLQAKTRLSVIRHALTVVAILVLRVVG  
EFN-  
VVAQEDVAMGHVECVLAESFEFTEKDAHIGPVGLRTPETILGDGTVFNEAVLGKVDLANTVADFRYLL  
LTDGGRQLGVRWATLRNMLYARIWLPAAAA LKNLLPIRFFLSHPEIHL LLMVALFGGISKARADKLM  
AGALIEEILEGVARFAAPEATTHQSYKERHFKYYGEEVDPVHLAYILQVFALVATQVTVSDRLLKDRYVL  
QLKVFRGFTSLLWVSLQLAEKGPSATIITVGTVAGLGALVLFILLMRDSVLVETLYRYVYVVM LGYEA



AKDVADADPEHFLALSAASRDVEWVEIIPAFFYYFTTAT-  
FEPFNTAVAKEFFGLFEERLRVIAVLAVPPDRVLELAEFVALAGTLATSADALPGVIATGLCEPNAAEVLE  
ADDRDWNLHRSMGITLAFFKAQESVNGWFDKGLHKGVAAVSLSEAGGFTTTNDCAVQAKKCVPAIH  
RQVDLGEIEAALIEVESAVLVSEEEQTLADKPTTRDKTVGAIGGVVLAGTMNMGTSLDQLERSSNIIEL  
EEEQYHAVNGKKD-  
QKLTDKILMVLSLAYFPVLRRTASASALNSGVFDLLIQAPPDADNSDHGRTLVIPTVH-  
ETAPLYAEAEIDRIAWIAPLHMLGTLPAVL-  
FEPDQYSFISMMIDASLEIMETAEVLDYHVLERGSRPPSFRVVLRGLHIRLMAAVGTIIVGSAGREEI  
TAYIQGRAVPIALNKHSFLPAFAASSCEIVDIMSTILRPPERSTVQMLILETVAEL-  
LEVTRIGNDKLERLLVLLPGLDMAELLEVAAGADFAEIVTIDAAITAILSVAAESVVLREMLLTAEIAVT  
ALALALALLMLTADQGLTLKEAAREEQMKELIQGGVVLQVSAADAMVLASTADKVRDLDTEGTTSA  
FASLNLATVSDGFYVMSSAVLQMSSDLMMIVEVARVLADKESKNALVVRHPEQVKTEPTYAEGSPG  
MVLQTLTQCIPPLAVKPEEVELLWTLVAALWQVKAHLAEARRPKLERILVLLLALSIIIVLLQSEGGGMG  
GG-  
MGPPPKILAAFSMLTVKASVGDEVKVTRRVMDLNSRLGRPEEAVNPEFRGEELEQTKFEAENVEVD  
MEDIRRFVDIPFLVSIRTQHNESEDRGARMVLDVTRVRFDL-  
VTKRSEVILVAATETDGIAREMAKDLQALHPEVAALGKIAALDHFISINDAHISNYVTAAINSVLGMLLL  
VLFIQQTRVAKVWVPTREVTMVFIMSALAVFFLVIGLAVNLVFMGGISPMQMTTLVLGEGVMAVR  
QTSTFPAES-  
VTILQNTYADLICAGRVTKADIETSLHIVVAARVARGTWYVIYLYEITQAQGEAGILQRAFRQATLSQSL  
IDGRMEVKIKVVTSDRYA-  
TYEIKGGQHRKGTRFLRVKIGHNIPVDILARLKLAFGPPNLILVKTFGAVVQKRFAQPLTHIRHGAVTIGP  
MEVASPYIQSKKARHAPGASVVEIKPDNIVRSVAVPELIWAREHEDQSAVHDKYVKTTHKIAAKRNR  
AVDKAQYDKRNQVHLSFIGLAVKVLPAQAIVHATAGTLLPTEAVSVTEGLKGVAATIRLDPMEKALIAY  
IKRMRPQLNLAGRTDKKIVKCLNNNLDDVEYGKLGRRRRIKPLTIKSVYDVEHREATELVKLMPYKDDVE  
GRKSQFAEK-  
AALFEPLKAFMMVFGLFIARAIYALYLRVVRRITILLVKTIVVNAKSVLSAIKIIGVSIRLRHKSTNIADTNH  
HIKTLEKRARMTLAGAPSVKLNLRGRVGGKGGRIKGYMPYKNFNIFEGLSSGRRAGVKDLAKLKKVD  
KTIAVDGIPTQQGGRIKPAQLSNAI-  
NTRVGVDIVGENIQEESNPRANAEMGQIFAAIDARVYSLVAALIGHALEAVLAVGTIWGIGRAHALLA  
LAFRVNAGIEMHSAA-VRQAVAAA-FAEAAGEA-VIADVSEAYLGDALTDASIDVCRMRRRQLG-  
LKKTCKDAYMKLTCFAGKGDKIKIEATQTQAYEIVATRTAERFGIKAKGTYGKERAMMQITPTKPVKV  
WVPVVFVSEDELLAPIRAVAETNGDGVVVKLTDDIKVTMFEKAVASLAVAGKSTSVVYTVLEKVTLSK  
DIIYEQRAKAHYGRGRLRSHVVHTKQKRHLMIKRTTVATPRMEAAARLTDGEVTVITGATMAFVLSE  
QDAV--  
GDVDMHFHEEPRREAALGISGPETFLTTEQPRVLALLFLREYLIHIVIDITCGGFADAATIFDLLRAMQN  
KLDRKIAADIAKTRMCLHDNVADMGVRQESPRRDKAGDAILYWINGVTANADIIMLVANLECKTA  
PENIHCAVRLFYQRVTLQAKERDGDVTVKLVPAKNQIEAAEGTVIYTIKGTPTGTVMKLNIEAISRSIV  
KSLAVQLFQVDLFLNDTWLGVLLRAASDVVFDAGDGREAVDHHVVERDTELELAPQKDIVRRKIRIYT  
PAAPSAVVIWDPAIDRADKADAQGTLKVYGPDLQDISCFTDIGSEPKIESLKAWEKEKYVVRDDIP  
PDI-  
TLVGKSSRVNKEFGIPDVGVCAPSKPGVTESIDRGEPKAGSCGEVANLPYPQESVNVNRVSSANVQKNI  
SMVLGGHPVGEMGISRGVERHLETNMCEILVDKDDVDVALDFYKIALTPLRVGLDKPNAKVDIGGKE  
SRKLMAVLGDGEADLQRHPKVSEAAGVVRNAGKKAKLPDDALLFDGVHHGDIKFTATDLPEGRV-

VTPVSNVKAQLKIDKVMLKTFHVVTLSFSSNKGQEHKILRLNALKKSTRHYEMMLKIRDTECATSPH  
AIPVGKILKIDALLQTICQAHYTAIEPLLADDLTALGVMGDQGLLHIVPRLMILAVLLCWGLAAQAIPT  
WDLQHTALVTDQTMGLPIRRRWSF-AISEVVGNTFFARTAEDDTEQRLHARNPV-VLL-  
YGKFAMV-  
ISPSGLKLGSTPSTEEGHGNEERLILSAERLQDAMSYYVLDVLLVFVDQVILAYGSGDTPKFLVADQAV  
TGRDNPQLVCLTR-  
TFPLDLQRDATFVLVFEDTTMKNLSHKKMHMNLILIRSKGWIVNVSTKILISDQAIASYAEDAGAHTQP  
SESALAVITSRVIAPIVLVSQKPTAPSKTMFLEALALYDKVTCTILNSPKRYFIFEGDVISILGDIDAAILG  
MQRQPQDRMRRVAVAGAIRLAIAMRASGIVARLDGAINFSRAVSFAR-AY-----  
DFRVRNHKTSTKRDRPYKGHPKFLHKAEDKALIAEGVDTLA  
>GCA\_000768555  
AVIKPVMNEYAPVLMIKQTQVATVSGAGSPSLRAKTVYAKSGLQRKTMTKRVAMNIYY-  
GVMKLGDIVQLVSISVDARAVCTVAQVVEQEVVHGLVALAAVKKIALEAISGMTTEDPAKVCEFD  
DELDLRKFRDAEDRADMLPVLLGLTLAIRFDPEPLVHDIPVYIEV-  
GIMADKGGIEVDDCAISTAVSDVDPLAYVSPIDLA AVAGEQMAFIDQEHAISAAREAIALEELALES AV  
LVVGIRPLLPV-LAEDGAN-MSFANRSRELGSIVDLAVSAERLSRAR-EQGIASEM-  
MARMQAEALTERRGTAEIRIVKRMNRSAGLADDPELVLLGDAAEGNSSWAGQIYDDPISGSSQSDS  
AGNIVVAANKRQNFARSITFLRKVEISDQATAPLMRGVKHNSKRSARKLDDAIAVLNFPNVPEGIAIR  
AEGDKPADTLLHDATETEEILLVVRWKVTWKTAIHALLVLGNIVGIIELGGIAAVGRPEGLLRHHKL  
NGSLIEQRPIIEKLTLLRLASLKQKLGKEQVIFVVKVSGDLVADAKVQM-  
GGLIGAVVAVQGDVIFVRRHRQTVVTDSEATVQILKGVAEGPADAEALLRIRVSHTLVALSILLIPQ-  
PVLVDSVSIREGVGKALQIIQLDVYLLRDMGTGSETLAESSSRELIREVLMIDPVTGVRLAYGEIKERIGKK  
VGLKDLETLF--  
ISIMQGITEPRMENLPAGVCRNFIQAGPRAAVGMLFLLLDEAGRVYTIDGDLRELPSVKSILGLVDSTA  
AKVLSATYGTDRRLRIRYADCEVLVAEAILYAYKEERKELLRMVPVYIINEAKRRQLVILALSLRGGHRA  
MASIGVMIAAAILESQADKGVVDHEEPEILLDDAEVVG TAMMISRQAALDLKQIVRTDVVVVPEFQE  
KMVVSRLFFCTEVAIFVIALITTVGEMLSREPNSAKETGAGFQKRIRKHAVMFALVSEFERRNCRDA-  
RAELFLGLGLADPRYGIFYINQPKKKQMPSEPSDRVDGFELVHAVKADTASN-  
ELEMPEAMALAVEADAAINLAAGVLAFTG-  
MTAIERVDSKRKMALATEKWNISKLEMADIHMSGAGRVRAAG-IEQANLSATLAAKNL--  
LYLPGASNSALEEDKLNAGASSAEAAEERQTRILLVTPVLVVIQDSSAAGLITNGGLEEWGTMAYKK  
HYAFAARMRLHMRTVD----GIEMEPSKQKAKEVKTVKLQGDTRFRQLAIDGVKEQMP-  
LHALNPDFAVLPVLPVTPAVGRVADEAVLGARVPCEFSL-  
RELQKSMRGAALPITAIRLLPMRAVRAMIEEDIMVAGKVAA-  
LLKIRAHETVAGIILRNDSEATLPWRLSVAERLEADAKRMAGYAARPFISKPSLCDVQAHANVAEAIETI  
AAGYVAKEERFVYPVEGIKIRLILSSPHSRVGEAKRAGEGHLHEMAKELIAKAVMMLKSEPDTNSEGLL  
NYVTTNQPTDLLFPDCLDVVIDMRRMSIV-----  
VQLTVV-  
HVVVEGVRDVGDYEIMAAAAPSGLVQVERVDDRTGRERTIMW MYGAMEELWLMSVRYADWVAD  
CAIGAILHVYAQSINRAFSLTRLQLEGWPQEASRWWNTWQLWLNKDGGFFGYEAAFRAVRQALKDA  
LFGYEMSDIEGVGRYQSRQELRVGYRIREQVDFARLDPRTDILLQAKTRLAVIRHALALVAILILREVGE  
FTLVVAHEDVAMGHVECVLAESFEFTDKNAHIGPVGLRTPETVLGDGTVLQEAVLGKIDLANTVVDYR  
YLFVVDGGRELGVWWLSI-  
NMLYTRIWLPPAQATLKNLLPICFFLRHPELNLEEISQAFKRISKARAEQLMAGALIEEILEAVARFADPE

ATTHQSNKERHFKYYGEEVDPVHLAYILELFALVATQVVVSDRLLKDRYVLHMRI-  
RGFTSLLWLSLQLAEKGPAATVITLGTIAGLGALVLFILL-RESVLVETLYRYVY--  
MLGYSAAKDVADADPEHLLVLAASRDVEYIEIIPAFFYFDTAT-  
FEPFNTAVAKKEYFGLFEERLRVIDVLAVPPARVEALVVFVALAGTLPTSAEALPGVIACG-  
CEPNAAGVLEADQDWNLHRSMGITLAFFEARESVKNWFDKGLHKDVAETGLREAGGFTTTNLCGKE  
AKKCVPAIHRMVDLGELEAGLIEIDSAVLVADEEQTLADRPTTREKKVGAVGGVLSGTMNMGSALE  
QVERGGNIIIELEQEQYHAVNGKKGDGKLTDKVLMVLSCAYFPVLRRMASATALDRGVFDLLISAPED  
AENLDHGRWLTIPVPTVHAE-  
AILYAESEIDRIAWIAPMHLLGTLPAVLLFEPDQYSFISMMIDASLEITQTAEVLLDDYHVLEKGARPPGFR  
IILIRGLHIRLLAAIGTIIVGSAGRAEITAYIQGKAVPISLAKASFLPAFAASSCKLVDIFSTMLRPPERSTV  
QTLILETVAEL-  
LDVTRGVNDKLERLQLLLPGLDAAALLGLVAKAEDFADIVTISRITAILSVAERVVRLRELLLELAEIAISS  
LALAIALLMLTPDRGLTQKERAREAQKKELIQGGAVLQIHAADAMVLAADTKVRLNTDEGTTSAFA  
SLNLATVSDGFYVMSSAVLQLSSDLMMIVSVARVLADKETKNALVVRHPEQVKTOPTYAEGSPGMV  
LQTLTACIPPLAIKPEDVELLWTLVAALWRVKAHLAEARRPRLERVLLLLALALIVLLQSEGGGMGGG  
-  
MGAAAKILAAFSILTIKASVGDEVKRVARRVMDLSSRLGRPEESVNPEFRGEELEQTKFEAENVEVDCM  
ETIRRFVDIPFLVSIRTQHNESEDGRARLVLDVTRVRFIDL-  
VTKRSEIILAAEAETDGIIARQMAKDMQSLHPEIAALGKIAALDHFISLNDGHISNYVTADINSVLGMLL  
LVLFIQQVRVAKVWWPTRREVTMVFIMATIAIFFLVIGLG-  
KLVFMLGGISPLQITTLILGEGVMAVRQASTFPADS-  
VTILQNTYADLICAGRVTKADIEASLHIVVGARVARGTWYVIYPYEITQAQGEAGIMQRAFRQATLSKS  
LIDGRIEVKVKVVTSDRYA-  
TYEIKGGQHRKGTRYNRVKMGHNIPVDLLARIKMAFGDPNLILVKTFGAVVQKRFAAPLTHMRHGAV  
TIGPMEVASPYIRMKKARHAPGDSVVEIKPDNIVRSVAVPELIWARENEDQSAVHDKYVKVTHKIAA  
KRNAAVDKAQYDKRNQVHLSFIGLAVKVLPQAIVDATAGTLLPTASVAVTENLKGVAATIRLDPME  
KALIAYIKRMRPQLNLGKTDNKIVKCLNNNLDDVEYGKLGRRALKPLTIKSVYDVEPRRATELVKLMP  
YKDDVEGRKSQFAEK--  
ALFEPLKAFMMLFGFIARAVYALYLRVVRTILLVKTKIVVNAKTVLSAIIIGVSIRLRHKSTNVADTNHH  
IKTIEKRARMTLAGGPSVKLHLHPGKIGMKGGRIKGYMPYKNFNIFEGLASGRRRAKRELAKLKTVDKTI  
TVEGIRTRQQGGRIKADLSNAI-  
NTRVGVDIVGENEQUEESNPRANAEMGQIFAAIDARVYSLVAALIGHALEAVLALAILGIGKAHALLA  
VRLHVNAGIEFHSA--VDEAVAAA-YAQPAGEA-AIADVSEGDGLTRISAASLDVCRMRRRQLG-  
LKKTKKDAYMELTCFAGKGDKVKIVEASQSQFYEIVATRTAERFGIKAKGTGKERAMMQIVPSKPVKV  
WVPVVFVSEEEELLAPIRAFAETNGDGVTVVKTLDIKVTMFEKAVASLAVTGKSTTVVYTVLEKVTLMK  
DIIYEQRAKAHYGRGRLRSHVVTHTKQDRHLSMMRRTVVADPRMNAARLTDGEVSVITGATMAFV  
MSEQDAV--  
GDVDMHFHEEPRREAELGIAGPETFLATEQPRVLALIFLREYLIHIVEIGTRGGFNDAATIYDILRAMHN  
KLDRKLSAEIAKVRMCLHDDVADMGVRQEAPRRETAGDPILSAYWINGVTAQSDIILLVANLECKTAP  
ENINCAVRLFYQRVTLQAKERGGDVTVALVKAQNQIEAAEGTVIYEIKGKTPGSIQMKLNVEAISRSIV  
KSLAVQLFQVDLFLSDTWIGTLLRAAQDVVYVDAKSGKEAVDHVVERDKAVEMAPQKDIVRRKIRVY  
TPAAPSAVVIWDAAIERADKADAQGTIIKIYGPLQDISCFTDIGSEPKIESIKSWDEKERYVVRDDIPP  
DI-  
TLVGKSSKVNKEFGIPDVAVCAPSKPGVVESIDRGEPKAGSCGEVANLPYPQESLVNRVSSANVQKNI

SMVLGGHPVGEMGISRKVERHLETNMCEIFVDKADVDVALDFYTLSTPLRVGLDQPNKVEIDGKES  
RKLMAVL DGEAALQRHPKVSEASGTGTTAGTKARLPDDALIFDGV LHGDISFTATDLPDGRV-  
VTPVANTVKAQLKIDKVLRLTFHVVTLSFSSHKGEENLIKRLNALKKSTRHYEMLLKIRDTECAQSPHAI  
PVGKILKIDALLQTICQAHYVAIEPLLADDLTALGVMGDQGLLHVPRMLAVLHLWGLSAADIIPN  
WDLPQRALITDLTMGLRVRRREWTY-AISEVVGNTFFARTAEDDTEQRLHARNPI-VLL-YGKFGMV-  
ISPSGLRLDSTAPTADEHGNADALILSRERLQDAMGYFILRILLVFVDESILAWGSGDEPLKFLVADQAV  
TGRDNPGLVCLTRRTFPLDLQRDATFVMVFEDSTMKNLSHKMHMNLVLIKSGWIVNVSTKILISD  
QAIASYAEDAGAHSQPSESALAVITSRVMAPIVLVLSQKPTAPSKTMFLEALNLLDDVTATVLNRPKRY  
YIFEGDLISVLR TVGASVILGMQRPQPDRMRRAVVTAAIRLAIAALASGVLVALEAGIINFARAISLAR--  
YT-V-----DFRVRNHKTSTKRDKPYKAHPKVLHKADSNKALVAEGVDTIA  
>GCA\_000836695  
AVIKPFLYTAYAPVLMIRQQQVATVSGAGSPSLRAKTVYRKSGLQRKVSTKWWASPLY-  
GVLKMSSLVQLVSISVDNRAVCTVAQVVEQEVVHGMVALDAVKRKIALQEIDGMTSEDPAKVIDY  
AGAIALKRFREADD RADLLPVLLGLTLKLFDPHQPVVHDLPPVVFV-  
GIMAQKGTIEVDDCAISTAVSDVDPVAYVSPIDLAKVSGQKMDYVDQEAASAAKEAIALEELALESA  
VLVVKI-PLLIPV-FAEEGDR-MSFANRSRNLETIVELAVSAVLITRARIA-DIAAAM-  
MARARAAALAERRGTAEIRIVKRMSRSAGLADDP ELAVLEDAAEAGNAEWAGLIYDDDLSGS-  
LSEAAGNIVFAANQRQATARSITYLRKVEISDKAAAPLMRGVKHNSKSRSSRK-----  
-----LVVRWDVTWKTALFILL-  
RAGDIVGLQLGGLAAVGRMDGVFNRRHHKLNGLIEQKRVIDKLT LRLRAALKQKLGAESVILVVRVT  
GDLVADATVQMG--  
DIGSVVAIQAEVIFVRRHRQT VITDQDATVEVLRGVAEGPADAKALLRIRVDHTLVEISVLLIPE-  
PVLVESVSIREGVGKALQIIQLDVYLLRDMGTGEDTLAKSMSRELIRDVLMVDPITGVTLAYGRLKERQ  
AKAMSLKDLET---  
LALVRGVTEPRMENLPAGVCRTFIRAGPRAAVGMLFLMLDPAGRIYTIDGDLRELPKSIKSLIGLVDGAK  
PKVLSASYATARLRVRYADVT VLTSEAGLYAYAEERKEIMRYVPVYITVEAKRRQLVILALSLRGGHRA  
GAAIGIMIAAALLESQPVEGEVNHAEPAILDDAEVVGSDMMISRQAALDLKQLVKMDVWVVFPEFQ  
EKMVVS LRRFFCTEVAIFVIALITTVGEMISREPSHAQEAGAGYSKRIRGHALLFALAATFDRRNARPA-  
APSLFLNLGLAPPRYGVLYKTQPKKKQMPAEPDTRVDGFDLVHAVKADGRS-  
HELDLREAMALAVE-  
SQPINLTAGVLAMTGGMAGLEKVD SKRKMVAATKW TIAPAGVLDLTLSGAQPVRCLG-  
IELADVSAALGAKAI-  
FLFLPGANNAELEEAKLDGAGASTVDAAEDKQTGILLVSPVVVVIQDSNAAGLIANGGLDEWGTMAY  
KKHYAFSARMRLHMRTVD AIQVGVAAPNKQKAEKIKTVKLEGDTRFRQLAVEGVKEQMP-  
LHALNP DFAALVPVLVTPAVGRVAAQTAVLGARVPCPASL-  
RELQKSQKGDALPISAVRLLGMGAARAMIDEDVMVAGKVAA-  
LLKIGALETIAGIVLLNDSEATLPWRLSVAERLEADTKRASGYAARPFASKPSLCNTQAHARAAEPIQEI  
AAGYIAKAERFVPVEALGIQLFLANLHSRVGGAKRAGEGHLHEMAKELRAKAVLLVRSEPDNTTEGIK  
KWMTTGQPTDVLFE DCLDIVIDMRRMNVV-----  
VQLNLV-  
HVVP GASDIGDRSIMAANADSGLVQTERVDDRTGRERTKMWMYGAMEELWLMSVTWADWIIN  
VKIGAIVLHVYAQTINRAFSLHRLQLAGWPPEADRWNTWQLWLNKDGGFFGYQAAAFRA-  
LQILHEDLYSYELRDVQGVGRMNSRQALRVGYRIRREEVEYSRSPRTDILLQSM TGLAVLRGALAIVAIL  
VVREIVA EFSLVVAMEDVAMGHVECVLADMFSFTAKNAHIGPVGLRTPETVLGDGTVFKEALLGKVD

LANTVAEFRYRVLTDGGRALGVAWATLENMLYARIWVPPAPAALKDLLPISFFLGHPIDL-----  
ISKARADRLMAGALVEKILSGVAFAEPEATTHQSGKEKHFKYYGEEVDPVHLAYILDFFILVATQVTVS  
DRLLKDRYALNLRVFRGFTSLLWLALQLGDKGPAATIITVDTIAGLGALVLFILL-  
RDSVLVETLYHRYTY--  
HRGYEAAKDVAADADPEHFLAALTRDVEWIEIVPAFFYYFALEDREHAHNTAVAKEFFGLFEERLRIV  
DVLAVPPDRVKAIEEFVALAGTLPTAAEALPGVIACGFCENAAEVLEASQDWNLHRHLGITLAFFKA  
QSSVNGWFDKGLHKDVAETGLREAGFTTPFLAAVEARQCLPAVHRVVDLGEIEAALLEIDSAVVVA  
DEEQTLADKPTTREKSVGAVGGVVLGTMNMGANLESVERGGNIIIELEEDDYRAVNGASDGSKLTD  
KVLMLVLSAAYFPVIARAASANSNLRGAVDLLIDAPDDADNLDHGR-  
MTIPAPTVAETAPLYAEAEIERIAWVAPLHLLGTLPAVLEFEPDLYSFMSSMMIDASLGITETSEV--  
EYHVLETGSRPPEFRILIRGLHLRQLAGVGLIIVVGSAGRSEVTTYIRD-  
AVPISLKRHTFLPAFSPSSCHKVDIFSTLLRPPERSAVQMLILETVAEL-  
LDVTRIENDKLERLRLLLPLGLDIAALLAFAAAAADFAAIVTIDAAITAILSVAEAVVRELLLTAEIAVTA  
LALALALLMLTPDKGLTLKEHAREAQLKELIQGGVMLQVRAADRMVLAATADKVRLSTDEGTTSAFA  
SLNLATVSDGFYVLSSAVLQLSSDLMMIVGVARVLADKETKNALVVRHPEQVKTQPTYAEGSPGMVL  
QTLTACIPPLAIKPEDVELLWTLVSALWRAKHLASAARPRVERILVLILALSLIIVLMQSEGGGIGGG-  
MGSAAKILAAFSILTIAKVGEEVRKVTRRVMDLNSRLGRPEEAVNPEFRGAEELEQSKFEAESVEVDTV  
TIRRFVDIPFLVSTRTQHNESEDRGARMVLDVTRTRFIDL-  
VTKRSEIILAARVETDGIIAREMQKDLQALHPEAAAALGKIAAFRHFIALQDGHISNYVTAAINSVLGMML  
LVLFIQQTRIAKVWVPTREVTMVFLLAAVAIFFLVIGLVQIVFMLGGISELQITTLVLGEGVMVVRQT  
STFPADS-  
VGILQNTYAELIAAGRVAKADIEASLHIVVGARVARGTWYVIYLYEISQAQGEAGIFQRAFRQATLSQS  
LIDGRMEVKIKVVTSDRYA-  
TYEIKGGQHRKGTRYNRVKVGHNIPVDVLARIKMAFQDPNLVLVKTFGAVVQKRFAAPLTHQRWGA  
VSIGPMEVASPYITSKKARHAPGDSVVDLKPNDVVRSAVVPELIWAREHEDNGAVHDTRYTKTTHKL  
AAKRRRAVDKAQYDKRNQVELSFMGLAVKVLPEKAIVHASAGTLLPTESVSVTEDLRGVAATIRLDPM  
EKALIAYIKMRPQLNLAGKTDKRIVKCLNNNLDDVEFGKLGRRRRIKPLTIKSVYDVEHRRATELVKLMP  
YKDDVEGRKSQFAE-----  
KAFMMLFGFIARAVYALSLRVVRRRTILLAKTRIVVAAATVLSAIIIGVSIRLRHKTTNVADTRHHIKTIEAR  
ARMTLAGAGQSKNLNSEGPIGKKGRIKGYMPYKNYNIFDGLDSGRRRAKVKEVAKLKKVDREIEVGGI  
RTRQQGGRKPKAHLNAMANTRVGVDIVGENVQEESENPRANAEMGQVFAAIDARVYSLVGALIGH  
ALEAVLAVAAAILGIGRAHALFAVAWRVNAGIELHSAA-  
VDAAVAAAAHAEPAGEAATIADVSEAYCGALSVTAASLDVCRLRRRELG-  
LKTKTRDAYMKLTCFSGKGERINIVEASQTQAYEIVATRTAERHGIHAKGQYGKERALMQIVPTKPVKV  
WVPIFVAEDELAPIRQFAETNGDGVAVVKLTDDIKVTMFEKAIASLAVAGKSTSVLYTVLEKVTTELAKDI  
IYEQRAKAHYGRGRLRSHVTTTQQKRHLMSMIRRTVVADPRMDAARLTDGEVSVVTGATMAFVMSE  
QDAV--  
GDADWHYQEEPRRDAALGIAGPETFLTTEHPRVLALLFLRAYLIHIVEIDTVGQVNDAAITYDILRPLQN  
KLDRKLSADIAKTRMCLHDDVPGMGVTEEAARREAAGDPILSAYWINGVPATADIILLVANMETACV  
PENIDCAVRLFYQRVTMMAKERGGDVSVAVVKANQIEQAEGTVIYTTKGVTPGTLMKLTVEGVS  
RSIVRSLAVQLYQVDTFLNDTWIAVLLRAAMKVVFEAREGKEAVDHVVERDSTMQADPQKDILPRK  
IRIYTPAAPSAVVIWDPAIEREDKADAQGTILKIYGNLQDIACFTDIGSEPKIESLKAWDEKEKYVVHRD  
DIPPDIDTFVGKSSKVNKEFGIPDVAVCAPSKPGVTESIDRGEPKAGSCGEVANMAYPQESLVNAVSS  
ANVQKNISMVLGGHPVGEMGISRDVERHLETNMCEIFVDKPDVNVALDFFTIRLT-

LRVGLDKPNARVEIGGKETRKLMAVLDGAAGLQRHPKVSEAAGIT-  
AAGARAKMPEDALIHDBGVHHGDITFTATDLPEGRV-  
VTPVTLKVKKQQLKIDKVMLKTFHVVTLSFSSNKGDDHLIKLRLNALKKSTRHYEMLLKIRETECAESPHA  
IPVGKILKIDSLQITICVKFTTPIEPLLSDDLTALGVMGRQGGLLVVPRMLAVMHLWGLEAALELPRW  
PLMRRRCVTDQTMGLATRERHFTY-AISEVVGNTFFARTADDDTQQR LHARNPI-ILL-FSKFGMV-  
ISPSGLRLDSTAVTEMERGNKSDLILSRERLQDEMGYYVVRVLLVFVDEVILGYSGEDPLKFLVAEQA  
VTGRANPGMVTLTRRTFPLDLQRDRTFVLVFEDSTMKNLSHKKMHMNLVLIKNKGWIVNVSTKILISD  
QAIASYAEDAGAHTQPSESALAVITSRVIAPIVLVVKQKPTAPSKSLFLEALALYDQVTATVQNPPKRY  
IFEGDVTSVLGAVDAVLLGMQRPQPDRLRRAIVARAIALRASGILAELEAGLINFARAVSFAA-  
CYPAPEAI-----EFRVRAHKVSTKRSRPYKEHTKFLHKAEDKSLIAAGVDTLA  
>GCA\_000967725  
AVVKPVTMNTYAPVLMIRQQQVATVSGAGSPSLRAKTVYRKSGLQKKTETKWWVSKDFYY-  
GVVKLGNIQVLSISVDNRAVCTVAQLVDQEVVVRGMVALEAVKKKIALEAIEGMTAEDPAKVVDY-  
GEIELKKFRDADDRADLLPVMIGLTLKIKFDPHEPVVHDLAVPVVFEV-  
GIMVQKGTMEVDDCGVSTALSDVDPIIYVSPIDLEAVAGDAMAYIDQEA AVAAAREDIALEELALESG  
VLVVGI-PLLIPV-FEADGDT-MSFANRSRTLKTIVNLAVSYPEIKRA-ID-NIAAAM-  
MEASQAALAEKKGTAEEIRIVKRMQRSAGLADDPDLVMLEDSAEGNSNWAGQIYDDPISGSSED  
SAGNIVHAANKRQNFARSITYLRAVEISDQAAAPLMRGVKHNAKSRAARKISDEIAVLNFPNVPEGIAI  
KAAMGKFEDTLLHDAAREQILL-----  
LNRHHKLNGSLIEQRRIVEKLT LRLRAALKQKLGKDQIIIFVVKVAGDLVAAATVQM---  
SVGAVVAIQGTIFVRRSRQTVIGDQEATVEVLRGVAEGPADAEALLRIRVDHTVVKLSVLLIPAVPVLV  
ESVTIREGVGKALQIIQLDVYLLRDMGTGEETLAKSKSREQFREVLQVDPITGVRLAFGHLRERLVKGGT  
MKELGTL---  
ISILKNVTEPRMENLPEGVCRSFVNAGPHAAVGMLFLLNDAGKIYTIDGDLRENTKSIKSLIGLVDASK  
PKILSAAYATARLKIRYADVHVLTSADLYAYAEERRELLRMVPVYIINAAKRRQLIIFALS LKGGHRRAR  
AALGVMIAAAILESQAEQGAVNHEEPAVLLDDGEIVGSEMMISRQA ALEVKQTFKIDVIVIFPEFQEKM  
VVSLKFFCTEVAIFVIALICTVGEMLSREP KHAQEGGAGFQKRIRGHSVLFALSVTFDRRNLRD--A-  
GLFLGLGLAPPRYGIFYTEQPKRKQMPSEADAEIDGFDLVHAIKEDATS-EQLDMPEAMALAVE-  
DASINVNGGVLALSGEMADVEKVD SKRKMALAVEKWTISPIVIDIKISGANPFRALG-  
IEQADVSASLPKKA VEELFLPGANNAELEEELKDGAGSSTAEEAEDKQLGILLVNPVLVVIQDSNSAALI  
ANGGLEEWGTMAYKKHYALAARMRLHMRTID-----  
MDPNKQKAEIKITVKLDGDTRFRQLATDGVKEQMP-  
LHALNPDAFVLVPVLVTPAVGRVAADADVLGADVPCDFSL-  
RELQKSQKGSALPISGIRVLGMRTARAMVDQDIMVAGKVAA-  
LLAIVALETITAIVLMNDTEATLPWRLSVAERLEADTKRSGGFASRPFSKPSLCKTQAHAKIADPIQEIA  
AGYVATEERFVFPVEGVDIQLILANPHSRVGTAKRAGLGH LHEMAKELQAKAVIMVQNEPETNTDGL  
LNYLTQQTDL LFEDCLDVIDMRRMSVV-----  
VQLNTI-  
HFVVPGARDVAAFEIMAAAAHSGLVQVERVDERTGRERTLMW MYGAMEELWLMSVKYADWVIDC  
AIGAILLHVYAQKINRAFSLERLQLAGWPPEATRW WNTWQLWLNKDGFFSYEAAFRVAVLKSDL  
DDYDMSDVEGVGRYQSRQELRVGYRIREQVEFEQLDPRTDILLQSLTRLSMIRHALNMVAILIVREIVV  
EFT-  
VVAQEDVAMGHVECVLADAFDFTAKNADIGPVGLRTPPEVVLGDGTVLKEAVLGKIDLANTVADFRYK  
MLIDGGRELGVSWLNI-NMLYARIWVPPAQADLKDLLPICFFLQHPQIDLLD-

ALFAGISKARANKLMAGAMIEKILEKVAADFADPEATTHQSKKLRFKYYGEEVDPVYLAYILAMFALVS  
TQVTVSDRLLKDRYVLNLKVRGFTSLWWLSAQIGDKGPAATIITVQTIAGLGALVVFILLMRAVVLVE  
TLYKYVY--  
MLGYQAAKDADPEHFLVLAHASRDVEWIEVVPAFFYYFKTATSMNNINTALAKEFFGLFKERLRV  
VDVLVPPDRVEALVDFVALAGTLTTSARALVGVIACGFCEPNAAVLEADQDWNLHRSMGITLAFY  
KAQVSVKKWFDKGLHKDVAEIKLNEAGALTTPFHA EVTAKKCVPAVHRVLDLGEVEAALIEIDSAVVV  
ADEEQLTADKPTTRENSVGAVGGIVLAGTMNMGANLDSVERAGNIIIEEENYAAVNGKKADGKLT  
DKVLMVLSQAYFPVLKRMASANALDRGAFGLLIDAPDDADNKHGGVLTIPAPTIHTESVPLFTETDI  
ERIAWIAPLHLLGTLEAVLAFEPDQYSFISMMVEASLDIMQTAEVLDYHVLEKGSRPPSFRVILIKGLHI  
RLLAGICTIIVGSAGRTEVTAYIQT-  
AVPITLNKSTFLPAFAASSCHADIFSTMLRPPERSTIEMLILETVAEL-  
LEVTRIENDKLERMDALLPGLDVAALLQLLAAAKDFADIVTIDAAITAILSVAAEAVVREMLLTMAEIA  
VTALALAMALLMLTRDQGLHQRETAREDQLKELIQGGTVLQVKAADRMMLASTADKVRDLTDEGT  
TSAFASLNLATVSDGFYVMSSSVLQMSSDLMMIVAVARVLADKETKNALVVRHPEQVKQTSTYAEG  
SPGMVLQTLTQAIPPLAIKPEDVELLWTLVAALWRVKAHLANAGRPHHERVLILILALSITVLLQSEGG  
GMGGA--  
GPAAKILAAFSILTIKAKAGEEVRKVTRRVMDLNSRLGRPEEAVNPEFRGAELEQTKYEAESVEVDTMET  
IRRFVDIPFLVSVRTQHNESEDRGARMVLDVTRVRFDL-  
VTKRSEIILAA RVETDGIIAREMGKDLAALQPEAAALGKIAALQHFAIQDAHISNYVTAEIHAVLGMLLL  
VLFFQEVRIKSVTPTRREVTMVFILAAALFFLVIGLVVQIVFMLS GISWNQLTTIVLGEGIMVVRQTS  
TFPADS-  
IGILQNTYADLICAGRVAKADIEKSLHIVVAGRVARGTWYVIYLYDISQAQGQSGIMQRAFRQLTLSQS  
LIDGRMEVKIKVVTSDRYA-  
TYEIKGGQHRKGTRYNRVKVGHNIPVQVLPRMKMAFSPPNLVLVKTFGAVVQKRFAQPLTHMRHG  
AVTIGPMEVSSPYIANKKARHAPGDSVVDLKP DNIVRSVAVVPELIWARENEDNGAVHDKYVKTT HK  
LAAKRKKA VDKAQYDHRNQVELSFIGLAVKVLPEKAIVHATSGELMPTASVAVTEGMKGIAATIRLDP  
MEKALIAYIKRMRPQLNLAGQTDKKIVKCLNNNLDDVEYGKLGRRKIPITIKSVYDVEHRRATELVKL  
MPYKDDVETRKSQFAEK--  
ALFEPLKAFMMLFGFIARSVYALHLRVIRRTILLVKT KIVVNAATVLSAIIIGVSIRLRHKSTNVADTKHHI  
KTIEARARMTLAGAGKVKLNLREGKIGMKGGRIKGFMPYKNFNIFDGLASGRRRAKV KELAKLKDVDKTI  
SVDGVRVKQGGGRTPKAQLSNAI-  
NTRVGVDIVGENEQUEESNPRANAEMGQIFAKIDACVYSHVGALVGHAEAVLAVVVIWAIGRAHNLL  
AVRLKVNAGIEMHSAA-VEAAVAAA-FAQPAGEA-  
AIADVSEGLD GALALTEMSVDVCRLRRRSLNELKTKKDAYMSLTCFSGKGDKVKIVEASQTQAYEIVA  
TRTAERHGIAKAGTYGKERAMMQILPTKPVKVWVPVFNEDELLAPIRAFAETQGDGVTVVKLTDDVK  
VTMFEKAVASLAVTGKATTVVYTVLEKVTQLMKDIIYTQRAKAHYGRGRLRSHVVTTTKQRRHLSMM  
KRTVIADPSMKASRLTDGEVTVITGATMAFVMSEQDAV--  
GDVDLHFHEEPRREAELGIGGPETFLTTEQPRVLVLLYLRAYLIHIVEIETTNGFADAATIYDVL RAMQN  
KLDRKLSADIAKTRMVLTDNVTDMGVTDVAPRRNAAGDKILSAFWINGVPANADIILLVANMECPCV  
PENIDCAIRLFYQIRITLQAKERGGDVS VAVVPAANQIEAAEGTVIYSIKGQTPGTVQMKLTVEGISRSV  
VKSAFVQLFQVDTFLNDTWIATCLRAANQVVFVSSDPKEAVDHVVERDTELEFAPQKDIVARKIRIYT  
PAAPSAVVIWDPAIDREDKAEAQGTILKIYGP NLQDINCFTDIGSEPKIESLKAWDEKEKYVVRDDIPE  
DITTLVGKSSKVNKEFGIPDVAVCAPSKPGVTESIDRGEPKAGTCGEVANMAYPQESLVNTVSSANVQ  
KNISMVLTGHPVGEMGISREIERHLETNMCEIFVDKEDVDVALDFHILQLTPLRVGLDKPNARVQIEGK

ESRKMAVQDGDAAALQRHPKVSEATGGQ-KAGTKARMPDDALILDGVMHGDISFTNTDLPEGRV-  
VTPVFNAVKAQLKIDKVILRGFHVVTLSFSNEKGEDHLIKRLNALKKNTRHYEMLLKIRETECAESPHAI  
SVGKVLKIDKLLQTICEAHYKAIEPLLADDLTALGVLGQQGLLHVVPRLMILAVMHLVRLALQISYW  
GLQADAIVTDQTLGLTMRERLSY-AISEVVGNTFFARTKEDDTEQRVHARNPV-VLL-LGKFEMI-  
ISPSGLGLKSTEVTPQDRGNAEELILSTERLQDEMGYYVLRILLVFVDMVILAYGSGDDPIKFLVADQAV  
TGRQNPGMVTLTRRTFPELQRDATFVLVLEDSTMKNLSHKMKHMNLVVIKSGWLNVNSTKILISDQ  
AIASYAEAGAHTQPSESALAVITSRVMAPIVLVVSQKPTAPSKTLFLEALSLYDEVSTATVLNPKPKYYIF  
EGDVISVLGTLASVILGMQRPQPDMMRRAVVAQIRLAIAIMASKVFTRLEQGLINFARAVTFAALTY  
ELDDAQL-----EFRVRNHDVSTKRSRPYKAHTKFLHKADVDSLVATGVDTLA  
>GCA\_001046955  
AVIKPVS LNTYAPVLMIRQTQVATVSGAGSPSLRAKTVYRKSGLSRKTSTKWWAKPLY-  
GVLKLGDIVQLVSISVDNRSVCTVAQLVEQEVVHGLVALDAVKRKIALEAIDGMTTEDPARVAEFEA  
ELDLQKFRDAQEHADLLPVMLGLTLKIKFDPHEPVHDLPIPVIFEVI-  
GIMAERGGIEVDECAISNAVSDVPITYVSPIDLDAVTGEQMAFIDQEA AVNAARTAEIEELALEAGIL  
VVGIDPLLPV-FADDAAV-MSFANRSRELGSIVDLAVAYPEITRARI-AGIASAL-  
MVRQAEEALAEKRGTAEEIRIVKRMSRSSGLADNPDLMVLEDAAEGNSAWAGQIYDDPISGSSES  
AGNIVHAANKRQNFARSITYLRQVEISDKAKAPLMRGVKHNSKRSARNVDDAIAVLNFPNPHGV  
AIRAEQDKPAATLLHDATEAEAILLIVRWKVTWKTAVFLLLVF-  
AGDIVGLVQLGGLAAVGRPDGILNRHHKLNGLSIEQKRVVEKLTIRAAALKEKLGADQVIILVVKVSG  
DLVADAKVQMG-  
GTLGSVVAIQGDVIFVRRHKQTI VTDQESTVEILRGVAEGPADAAAALLRIRVDHTLVKLTVLLIPE-  
PVLVESVTIREGVGKALQIIQLDVYLLRDMGTGDETLAESQSRELIRELLMVD PITGVRLAYGQVKERLN  
KQLTIKDL-----RSIL-  
DITEPRMENLPEGVCRTFIQAGPEAAVGQLFLLAEAGKLYELDGDREL PKTVKALIGLVDAKAPKVL  
ASYATARLKLRYADCTVLEAEADLYAYAEERRELLRMVPVYIINAAKRRQLVIFMLS LRGGHRRALAAIG  
VMLAAAI LESHADQGVHHAAP EILLDSAEIVGTAMMISRQASDLKARSKTDVIVVFPEFQEKMVVS  
LRFCTDVAIFVIALIVTVGEMLSREKSHAQEAGAGYQKRIRGHSMLFALAVVFD RRNL RDA-  
TGD LFLALGLAAPRYGILYTNQPKKKQMPSEPDSDRVDGFELVHAIKEDERKNHELEMPEAMALAVE-  
SETINLSAGVLALSGEMAAVERVDSKRKMSKAVEKWNISRLQVRDVALSGAQPVRATG-  
IEPFAVLAALGAKNV-  
FLYLLGASNEELESRLDGAGSSTANVAEDRQRQILLVHPVLVVIQDSGAASLVSNNGGVDEWGT MAY  
KKHYAYAARMRLHMRTIDAIEVGVEMAPNKQKSEKVKTVKLEGDTRFRQLAVEGIKEQMP-  
IHALNP DFAVLVQLLVTPAVGRVAADAGVLGAEVPCDFSL-  
RELQKSMKGAALPISAIRLLAMRAARAMIEEDIMVAGKIAA-  
LLKISALETILAVILRNDSEAWGPWRLSVAERLEADTKRASGFAARPFKSKPSLCETQAHAKVADVIQEI  
AAGYVAAEQKFVFPVEGIAIQLILSSPHSRVGEAKRAAEGLHDMAKELVAKAVLMLQNEPDTNTEG  
LLNYITTNQPTDLLFPDCLDVIILRRMSV-----  
IHLNTV-  
HVVRGVRDV GDFQIMDANAPSGLVQVERIDERTGMEKTIMW MYGAMEELWLLSITYADWVTDC  
AIGAILVHYAQSINRAFS LKRLQLNGWPKEAARWWNTWQLWLNKDGFFGYEAAFRAAAQVLKAA  
LYDYDMSDVEGVGRYQSRQQLRVGYRIREQVEFARLDPRTDILLQARTRLSVIRHALTVVAILVLREVV  
GEFT-  
VVAEEDVAMGHVECVLADCFDFTRKNAHIGPVGLRTPETVLGDGTVFKEALLGKVDWANTVADFRY  
LVIVDGGRRLGVTWVAL-NILYPRIWLPPAEALKNLLPICFFLSHP ELDL-----



ISKARADKLMAGALVEEILEGVARFADPEATTHQTNKERHFKYYGEEVDPVYLAYILEIFALVATQVTVS  
DRLLKDRYVLNLKV-RGVTALLLLALQLAEKGPAATVITVGTIAGLGALVLFILL-  
RDEVLVETLYHRYVYV-MRGYSAAKDVADADPEHFLRLAAVSRDVEWIEIIPAFFYYFKTAG-  
FQPFNTAVAREFFGLFAERLRVVDVLAVPPDRVAALVEFVALAGTLPTSAQALPGIIATD-  
CEPNAAAVLEAEQDWNLHRSMGITLAFFEARESVKGWFDKGLHKEVAETGLSEAGGFTTHNDCEVE  
AKKCLPAIHRVLDLGEIEAALIEIDSAVVVADEEQTLADTPTRDKAVNAIGGVVLAGTMNMGANLDS  
VERGGNIIIELEEDQYHAVNGKKTGDKLTDKVLMLVSRAYFVVLRALASANALDRGVINLLIDAPQEAD  
NLDHGG-MVIPAPSVLGETTPLYAESEIDRIAYIAPIHLLGTAAVL-  
FEPDQFSFISMMIEASLEIMETAEV--  
DYHVLEKGGRPAPFRVILIKGLHIRLMAAIGTIIVVGSAGRAEVTAYIQGRAVPITLNKNTFLPAFAASSC  
KAVDIFSTMLRPPPERSTVQMLILETVael-  
LEVTRLENEKLERIEMLLPGLDMAELLDLAAAATDFANIVTIGAAITAILSVAEEAVVLRELLLTkAEIITA  
LALAIALLMLTGDRGLTQKESARDGQMKELIQGGAVLQIRADDRMVLAATADKVRLDTDEGTTSaf  
ASLNLATVSDGFYVLSSAVLQMSADLMMIVTVARVLADKEAKNALVVRHPEQVKTQPTYAEGSPGM  
VLQTLTGCIPLAIKPEEVELLWTLVTALWRVKAHLAQARRPLRERVLIILLALIVVLMQSEGGGMG  
GG-  
VGSAAKVLAAFSILTikaAVGDEVrkVTRRVMDLNSRLGRPEETVSPEFRGEELEQSKFEAENVEVDTM  
ETVRRFVDIPFLVSVRTQHNESEDrgARLVLDVTRVRFDL-  
VTKKSDVILVERVETDGIAREMAKDLQALQTEAAALGKIAALDHFIALNDGHISNYVTEKIHSVLGMLL  
LVLFIQQVRIAKVWVPTREVTMVFIMATLAFFIVIGLAVNLVFMVGGISPLQITTLVLGEGVMAVRQT  
STFPAES-  
VTILQNTYADLICAGRVTKADIEASLHIVVGARVARGTWYVIHHYEISQAQGEAGIMQRAFRQATLSQ  
SLIDGRMEVKVKVVTSDRYA-  
TYEIKGGQHRKGRFHRVKMGHNIPVEILARIKLAFGDPNLILVKTFGAVVQKRFAQPLTHIRHGAVTIG  
PMEVASPYITMKKARHAPGDSVVDVKPDNIVRSVAVVPELIWARENEDNSAVHDKYVKTTHTKTAak  
RNRAVDKAQYDKRSQVHLSFIGLAVKVLPEQAI VHATAGTLLPTESVAVTENLKGVAATIRLDPMeka  
LIAYIKRMRPQLNLGGKTDKKIVKCLNGLDDVEYGKLGRRKIKPITIKSVYDVEHREATELVKVMpykd  
DVESRKSQFAEK--  
AIFEPLKAFMMLFGFIARAVYALYLRVVRRTILLAKTKIVVNANTVLSAIIIGVSIRLRHKSTNIADTKHHI  
KTIEARARMTLAGTPSVKLNLRGKVG MKAGRIKGYMPYKNFNIFEGLASGRRAKVKDLAKLKKVDKTI  
SVDGIRTRQ-  
GGRIPKAQLSNALANTRVGVDIVGENMQEESNPRANAEMGQVFAAIDARVYSLVAALRGHALAAVL  
AVCAIQGIGRAHSL LAVY-KINAGIEFHSAa-VETAVAAA-  
YAQPGGEAAALWDVSEADLGTLLLTEASLDVRRPRRSLGELKKTKEAYMSLTcfGGKGDKVKIVEA  
TQTQAYEIVATRTAERFGIAAKGTYGKERAMMQITPTKPVKVVVPVVFVSEDELLAPIRAFAETNGDGV  
TVVKLTkdIKVTMFEKAVASLAVAGKSTSVVYTVLEKVTELS KDIIYDQRAKAHYGRGLRSHVVTHTK  
QKRHLsMIKRTVVASPKMDAARLHDGEVTVITGATMAFVMSEQDAV--  
GDVDMHFHEEPREAAALGIAGPETFLATEQPRVLALLLREYLIHIVDIETVGGFADAATIFDILRAMQN  
KLDRKLSAEIAKVRMCLHDDVADMGVKAEPREAAAGDPILSAYWINGVTASSDIILLVANLECHTAP  
ENIDCAVRLFYQRITLQAKERGGDVSVALVPAQNQIEAAEGTVIYTIKGKTPSTVQMKNIEAISNSIVK  
SLAVQLFQVELFLNDTWIAVLLRAAEEVVFVDSGEGREAVDHVVERDTELEMAPQKDIVRRKIRIYTPA  
APSAVVIWDPAIERADKADAQG TILKIYGPDLQDIACFTDIGAEPKIESLKAWDEKERYVHRDDIPDI  
TTLVGKSSRVNKEFGIPDVAVCAPSKPGV-  
ESIDRGEPKAGSCGEVANLPYPQDSLVRVSSANVQKNISMVLGGHPVGEMGISRGVERHLETNMC

QIFVDKDDVDVALDFYKLALTPLRVGLDSPNAKVQIDGKESRKLMAVLGDGEAKLQRHPKVSTAAGG-  
RKAGMKARLPDDALIFDGVHHGDIKFTATDLPEGRV-  
VTPVFNNVKAQLEIDKVLKTFHVVTLSFSNDKGEEHLIKRLNALKKSTRHYEMLLKIRDTECATSPHAI  
PVGKILKIDSLLQTICQAHYKAIEPLLAEDLTALGVLGDQGLLHIVPRLMILAVLTLWGLEAALEHRRW-  
LQATRLVTDQTMGLAVRERHWSF-AISEVVGNTFFARTKDDDTAEQLHARNPI-VIL-YGKEGMV-  
ISPSGLKLASTKPSATGHGNENRLVLSTERLQDSMSYFVLKVLLVFVDEMLVAWGSGEPLKFLVAEQ  
AITGRANPQLVCLTRRTFPLDLQRHAVFVMVFEDSTMKNLSHKKMHMNLVLIKSGWVVNVSTKILI  
SDQAIASYAEDAGAHTQPSALAIITSRVIPIVLVISQKPAAPSKTMFLEALNLLDEITVTQNKPKRY  
YIFEGDVAVLGGDLAAVLLGMQRPQPARMRRAVVAAAIRLAIALRGSAVVAQLEGGVLNFARAVSL  
SA-VYPDLDF-TGAAIE-RAIAFRVRNHKTSTKRDRPYKGHPKVLHKAEEKSLVADGVDTLA  
>GCA\_001399515  
AVIKPVTLPVYAPVLMIRQQQVATVSGAGSPSLRAKTVYAKSGLQRRRTVTKWVLSPFYY-  
GVIKMGKLVQLVSISVDHRAVCTVAQLVEQEVVVRGMVALDVVKKKIALQEIDGMTSEDPAKVVDYE  
LTLETKRRLDSDRADMLPVLLGLTLAIKFDPPHEPVVHDLAVPVIFEVI-  
GIMAQKGTIEVDDCAISTAVSDVDPINIVSPIDLA AVAGEDMAFITQDAAIDA AVAKIALEELVLESDV  
LIVGISSLLVPV-FDADGDT-MSFANRSRTLESIVDLAVAYPQLTRAR---IASAW-  
MRAAQAAAALSEKRGTAEEIRIVKRMSRSAGLADDPDLLILEDAAEGNSSWAGQIYDDDISGSSQSDS  
AGNIVHAANARQNFARSITYLRKVELSDQAEAPLMRGVKHNSKSRAARKLNDIAIELNFPNVPEGIAI  
RAEGGKADVTLHDAAEEGEILM-IVRWHVTWRTAIIIALVG-  
AGDVVGLVPLGGAASIGRRDGMNLNRHHKMNGSLIEQKRVIDKLTLLRLRAALKQKLKGDNVIIFFVKV  
QGDLVAAATIQVG--  
DIGAVVAIQGETIFVRRHKQTVIKDEEATVEVLKGVAEGPADAEALLRIRVSHTVVDISVLLIPQ-  
PVLVESVAIREGVGKALQIIQLDVYLLRDMGTGEPTLAVSKSRELIRSVLQVDPITGVRLAYGGLKERMG  
HGMTLKDRLTLFN-  
AAIHQNVTEPRMRNLADGVHRNMVEAGPRAATGTLFLILDDAGWLEGLDGLRELTKGVKALIGLL  
DSAKPKVLSAGYAAALLKLRFDCTVLTAEANLYAYREERRELLRMVPVYIIIEAKRRQLVILALSLRGG  
HLRARMAIGVMIAAAIIESQALQGDVHHAEPVMLDDAEIVGSSMMISRQSALDLKQILKMDIIVIFPE  
FQEKMVVSLRFFCTEVAIFVIALITTVGQMLSRDPAHAQEDGAGYSRRIRAHSLLFALAVTLDRRNMG  
VDALADLFLGLGLAEPRYGILYTRAPKKKQMPSEPDGDRVDGFELVHAVKADKAS-  
TVLELREAMALAVEATVTINLSAGVLALNGEMTAVELVQSNRKL SLAVEKWTISAEDILDVTFSGAARV  
RALGNIELADISAAALQKAID-  
LYLPGATNAEEETLAGAGVSAIEAAADRQIAILVVRPVVVIQDSNAAGLIANGGVLEWGT MAYKK  
HYAYAAARLHMRTID-----LEPNKQKAEIKTVKLGGDTRFRQLAVAGVKEQMP-  
LHALNPDFAVLPVLPVTPAVGLVADEALLGGRVPCPASL-  
RELQSQNADALPISAIRVLGMRAARAMVEEDVMIAGKLP AELLVILALETIIAIVLLNDSEATLPWRLS  
VAERLEADTKRDGGYAARPFTSKPSLCNTRAHAKIAENIQEIAAGYVAKAEKFVYPVEGIPIQLILASPHS  
RVNTNKRAGLGHHLHQMAKELQAKAVVLVQNAPDTNTQGLLNYMTTQQPSDLLFSDCLDIVDMRR  
MSIV-----IHLNTV-  
HPVVEGVRDVGRYQIMNAAFPSALVQVERVDDRTGRERTRMWMYGAMEELWLMSIRYADWVVN  
TAIGAILHUYAQTINRAFSFMRLQIAGWPKEAVRWNTWQLWLNKDGGFFGYTAAFRAVRQVLKAD  
LYDYQLKDVEGVGRMQSRQQRLRVGYRIREQVAFSRLDPRTDILLQSL SRLSTLRHALKIVSLLVMRQFV  
IEFTLVVAQEDVAMGHVECVLADSFATAKNADVGPVGLRTIETVLGDGTIFQDALLGKVDFSSTVAD  
FRYL FIVDGGRALGVKWVTMQNLLYARIWLPPAAATLKNLQPICFFLGHP TDL LLD-  
ALFAGISKARADRLMAGAMIEKIIKVVAFADPEATTHQSRKLKHFKEYGEEVDPVFLAYILAMFALVST

QVTVSDRLLKDRYVLQLKIFRGFTALWWLGAQLGAKGPAATIISVGSVAGLGALVLFILL-  
RVSVLVETLYRYVY--MKG YQAAKDAADADPEHFLALAEVSRDVEWIEIVPSFFYYFKTAT-  
FEPFNTALAKEFFGLFPERLRVVDVLAVPPDRVESLKDFVALAGTLATSADTLVGVIACDFCGPNAAGV  
LEADQDWNLHRSMGITLAFYDARESIKGYFDKGLHKG VATVQLEEAGALTSPFQAAVTAKRCAPAVH  
RVLDMGELEAALIQVDSAVVVADEEQTLADQPTTRDRAVGVVGGVILAGTMNMGAALDQLERGSN  
IIIEEEGYHAVNGKSDGKLTDKVLMVLSAAYFPVLRRLASANSLEKGVFHLLIPAPDDDENSDHGR  
AMSV PAPTIIYAETAPLYAEAEIDSIAWIAPLHMLGTLPVLLFEPDQYSFISMMIDASLNIVENAEVL-  
DYHVLEKGGRPDPDFRIILIRGLHVRQMGAIITIVVGSAGRTEITAYIHG-  
AVPIGLRRNTFLHAFATSCFVVDIFSTMLRPPPERSTILMLILETVAEL-  
VDVTRWEADKLERLLLLLPGLDVAELLVLLAAARDFAQIVTIDAAITAILSVPAEPVVRDLLLLTLAEIAIS  
ALAMGIALLLVLTPAEGLHQREHAREAQGKALIQSGAVLQVHAADAMVLAATADKVRLATDEGATS  
AFASLNLATVSDGFYVLSSSVLQMGPDLMIVKVARVLADKETKNALVVRHPEQVKTQPTYAEGSPG  
MVLQTLTGSIPLSIKPEQIELLWTLVHALWRVKAHLAEARPITERVIVLILALVIVVLLQSEGGGMGA  
G-  
LSSGAKWLAASFLLTLKAKVGDEV RKVTRRVMDLSSRLGRP EDTVNPEFRGAEEQQKYEAANVEVD  
TMETIRRFVDIPFLVSIRTQHNESEDGRSRMVL DVSRTRFIDVIVTKRSEIILAA RVETDGIAREMSKDLQ  
ALHPQHAALGKIAALQHYISLNDGHISNYVTAEIHSVLGMLLLV LFAQQVRIGKITWPTRRRETMVVAI  
AALALFFAVILLVIQIVFMLS GISWQQITTLLVLEGIVLV RQTSTFPVDA-  
IGILQNTYADLVAAGRVAKADIEASLHIVVGARVARGTWYVIYLYEITQAQGESGILQRAFRQATLSQR  
LIDGRLEV KIKVVTSDRYA-  
THEIKGGQHRK GTRYNRVKVGHNIPVAVLARIKLAYS DPNLVLVKTMGAVVQKRFAQQ LTHIRHGAI  
TIGPMEVSSPYIKAKKARHAPGDSVVD A KPDNIVRSVAVVPELIWARENEDNNAVHDKYTKTTHKLA  
AKRRKA VDKAQYDRRNQVQLSFIGLAVKVLPEKAI VQATAGTLLPTSSVSVTEGIGKIAATIRLDPM EKT  
LIAYIKRMRPQLNLGGKTDKKIVKCLNNNLDDVEFGKLGRRKIPITIRSIYDVEHKEAVELVKLMPYKD  
DVEGRKSQFAEK--  
AIFEPLKAFMMMFGFIARAIYALSLRVVRR TILLVKCRIVVNADTVLSAIKVIGVSIRLRHKSTNVAETDH  
HIKTIEKRARLTLAGTTNVKLHLHEGRVGKKGGRIKG FMPYKNYNIFDGLASGRRRAKVQEVA KLKKVDK  
EIVVDGIRVKQQGGRQSKADLSNAIANTRVDVD-  
VGETTQEGSNPRSNAEMGRVFAAIDARVYALVGAITGHALA AVLAIVRWFIGRTHCLLAVAFRVNAG  
IELHSAA-VEQAVAAA-  
AARAAGEATAMWDISEYPGVALLIGEASTTVCRATRRRINELKTKKEAYLALSCFAGKGEKVVIDAS  
QTQAYEVVTT RTAERHGIHAKGTFAKERAIMQITPTKPVKIWVPIFVSETELLAPVRAFAETNGDGVTV  
VKLIKDIKITVFEKAIASLAVTGKSTSVVYTVLEKVTELMKDIIYEQRAKAHYGRGRLRSHVVTHTKSRHL  
SMIRRTVVADPSMNAARLTDGEVS VITGATMAFVMSEQDAV--  
GDVDMHYHEEPRREVALGISGPETFLATAQPRVLALIILREYLLHIVEVDTTGNVADAATIYDVL RAMQ  
SKLDRKLSADIAKVRMVLVDDVP EMGVTDVAARREKAGDAIL SAYWINGVPAVADIILLVANLEVA AV  
PETVDFAIRLFYPRITLQARERGGDVSAVVKAQNQIEAAEGTVIYTTKGVKPGTLQFKLIEGISK SIVKS  
LAVQLFQVDLFLNDTWIATLLRAALEVVFMDASDPKEAVDHVVDRDHAVEMAPQKHIVARKIRIYTP  
RAPSAVVIWDP AIDRS DKADAQG TILKIFGPNLQDISCFTDIGAEPKIESIKSWDEKEKYVVRDDIPADI  
-TLVGKSSRVDKEFGIPDVAVCAPAKPGV TESIDRGE P-  
VGSCGEVANLAYPQEGLVNGVSSANVQKNISMVLGGHPVGEMGISRSVERHLETSMCEIFVDKPDV  
DVALDFFRLILT-  
LRVGLDKPNRRVAMDGRETRKVM AVL DGDAAALQRHPKLSEATGITQGAGSKARLPDDSLILDGVLH  
GDVPFTITDLPEGRV-

VTPVVLAVKAQLSIDKVMVKTFHVVTLSFSNNKGEDHLIKLKLNALKKSTRHYEMLLKIRETECAESPHA  
IPVGRILKIDALLQTICKAHYTAIEPLLADDLTALGVMGDQGLLHLPRLMILAVALLA-  
IDAEMFIAPWALPRIALVNEQTMGLRLRARDWTY-AISEVVGNTFFARTAADDTEQRFARNPI-  
MLL-YSRAGMV-  
ISPSGLRLASTAATDLQEGCA\_AAVILSAESLQDAMEYYVLQILLVFVDQVILAYGSGSSPIRFLVADQA  
VTGRGNPGMVTLTRRTFPFELQRDAVFLVVADSTMKNLSHRKMHMNLILVKNKGWIVNVSTKILIS  
DQAISYAEADAGAHTQPSESALAIITSRVIPIVIVVSQKPTAPSKSLFLEALSLYDKVTSTIRNAPKKYFIF  
EGDLISVLGPIDAAVLKGLQRPQPDRMRRAVIAIAIRLAIAYAASDIWVQLAHHVVNFARAI SFVALCY  
DEP-----AFRVRAHKVSTKRSPYKEHTKFLHKAEEVEKALVAAGVDTLA  
>GCA\_001411945  
AVIKPVTMDAYAPVLMIRQQQVATVSGAGSPTLRAKTVYAKSGLQRKSETKWVSKDFYY-  
GVVKLGNIVQLVSISVDKRAVCTVAQLVDQEVVVRGMVALEAVKKKIALEAIQGMATAEDPAKVVDYA  
SEIELRKFRDADDRADMLPVLLGLTLKIKFDPHQPVVHDLPIPVVFEVV-  
GIMVQRGQIEVDECAISTAISDVDPVIVVSPIDLAAVAGDKMAYIDQEA AVANAKQEIDLEELAESSV  
LVVGI-PLIPV-FAADGDV-MSFANRSRTLKTIVNLAVSYPAIKRA-----IAAAM-  
MDASQAAAAAEKRGTAEEIRIVKRMQRSSGLADDPELLMLEDAAEGNSNWAGQIYDDPISGSSES  
AGNIVYAANKRQNFARSITYLRAVEISDPAAAPLMRGV KHNSKSRAARKLDDTIAALNFPNVPEGIAIR  
AEAGKPRDLLLHDATEGEEILLIWRWHVTWKTAVIISLFPLADNVVGIITMGGIGAVGRKDGLLRHHK  
LNGSLIEQRRIVEKLT LRLRAALKQKLGAEQIIIFVVKVAGDLVAKAKVQM---  
SVGTVVAIQGETIFVRRHRQTVIADQEATV-ILKGVAEGPADAQALLRIRVDHTVVKLSVLLIPD-  
PVLTSVSIREGVGKALQIIQLDVYLLRDMGTGEETLAKSRSEVIREVLQVDDITGVRLAFGQLRERLVK  
GGTMKELG-----  
IAILKDITEPRMANLPAGVCRTFVNAGPRAAVGMIFLLLDEAGKIYIDGDLRENTKSIKSMIGLVDAAK  
PKTLSAGYATTRLKIRYADVTLTSDADLYAYAEERKELLRMVPVYITNQAKRRQLIIFALS LKGGHRRRA  
RAALGVMIAAAILESQAEQGAVNHAEPVLLDDGEIVGSEIMISRQAALDLKQIIKTDIIVIFPEFQEKM  
VVSLKFFCTDV AIFVIALICTVGEMLSREPSHAQEEGAGFQKRIRAHSVLFALAVTFDRRNLRTD-  
TPTLFLNLGLAPPRYGVFYTEQPKRKQMPSEADDDEVDGFDLVNAIKEDGTK-  
EELDMPEAMALAVE-  
DGTINVNAGVLAMSGDMAAVEKVDSKRKMALAVDKWTIARVDIVDLKISGAAPFRALN-  
IEQADVSATLSNKQV-  
FLFLPGANNAEMEEAKLDGAGSSTAEEAAADKQLGILLINPVLVVIQDSNTAGLIANGGLEEWGT MAY  
KKHYALAARMRLHMRTID----GVEMDPNKQKAEIKTVKLEGDTRFRQLATEGVKEQMP-  
LHALNPDFAVLPVLPVTPAVGRVAADADVLGARVPCDASL-  
RELQKSMKGNALPISGIRLLGMRAARAMVDEDEDIMVAGKVAA-  
LLGIVAVTTITHIVLRNDSEATLPWRLSVAERIEADTKRASGFAARPFSKPSLCKTQAHAQIADPIQEIA  
AGYVATEGRFVFPVEGIPIQLILASPHSRIGA AKRAGEGHLHEMAKELQAKAVIMVLNEPDTNTEGLLN  
YLTTQQPTDLLFEDCLDVIDMRMSVV-----  
VQLNTV-  
HVLVPGVRELADREIMAAAAHSGLVQIERVDERTGRERTLMW MYGAMEELWLMSIRYADWVVDVA  
IGAILLHVYAQQINRAFSLERLQLAGWPMEATRW WNTWQLWLNKDGFFSYEAAFRAVKAVLKS DLD  
DFDMSDVEGVGRYQSRQQRLRVGYRIRQQVAFEQLDPRTDILLQSMTRL SVIRHALTMVAILIVREVVV  
EFTLVVAKEDVAMGHVECVLADSFDTAKDADIGPVGIRTPDPVLGDGTVLKEAVLGKIDLANTVADF  
RYKMLVDGGRELGVSWVTLQNLIIYKRIWVPPAQAALKNLVPIAFFLGHTELNLHIFPALWAGISKARA  
NKL MAGALIEKILEKVA AFADPEATTHQSKKIRHFKEYGEEVDPVYLAYILDMFALVATQVTVSDRLLK

DRYVLNLKIFRGFTSLLWLSAQIGDKGPAATVITVQTIMGLGALVLFILL-RVVVLVETLYYKYVY--  
MLGYQAAKDVADADPEHFLSLAHASRDVEWIEVIPAFFYYFKTAGSRLSKNTALAKEFFGLFKERLRVI  
DVLAVPPDRVEALVAFVALAGTLGTSQAQALPGIACGFCEPNAAVLEADQDWNLHRSMGITLAFYD  
ARESVKGWFDKGLHKDVAATGLKEAGALTPFHAGATAKQCVPPIHRVLDLGEVEAALIEIDSAVVVA  
DEEQTLADKPTTRENSVGAVGGVVLGTMNMGANLDSVERGGNIIIEEEEQYSAVNGKKSDBGKVT  
DKVVMVLSAAYFPVLKRMASANALDKGAFGLLIDAPDDADNKGRELTIPAPTVHAESAPLYAESEI  
ERIAWIAPLHLLGTLDVAVLGFEPDQYSFISMMIDASLEIMETAEVLLDDYHVLETGSRPPGFRVILIKGLHI  
RLLAGVCTIIVVGSAGRTEVTAYIQG-  
AVPITLNNKKTFLPAFAASSCHADIFSTMLRPPERSTIQMLILETVAEL-  
LEVTRIENDKLERMFALLPGLDVASLLDLVAAATDFAAIVTIDQAITAILSVAEEAVVREMLLTAEIAV  
TALALALALLMLTPDQGLHQKEQAREAQMKAIIQGGVVLQVKAADRMMLASTADKVRLDTDEGT  
TSASFASLNLATVSDGFYVLSSAVLQMTADLMMIVAVARVLADKETKNALVVRHPEQVKTQSTYAEGS  
PGMVLQTLTGAIPLAIKPETVELLWTLVAALWRVKAHLANAARPHNERVLILIALSLITVLLQSEGGG  
MGGG--  
GPAAKALAAFSILTIIKAKAGDEVKVARVMIDLNSRLGRPEEAVNPEFRGAELEQSKYEAENVEVDTM  
ETIRRFVDIPFLVSIRTQHNESEDRGARMVLDVTRVRFIDL-  
VTKRSEIILAAARETDGIIAREMGKDLAALHPEAAALGKIAALQHFIQVQDAHISNYVTAEIHAVLGMILL  
VLFIQEVVRVGKVVWPTRRVETMVFIAMAALAIFFLVIGLGVQIVFMLSIGISWNQLTTIVLGEIMVVRQT  
STFPEGS-  
IGILQNTYADLICSGRVAKADIEASLHIVVAGRVARGTWYVIYLYEISQAQDQSGIMQRAFRQMTLSQ  
SLIDGRMEVKIKVVTSDRYA-  
TYEIKGGQHRKGTRYNRVKVGHNIPVQVLPRMKMAFGPPNLVLVKTFGAVVQKRFAQALTHIRHGA  
VTIGPMEVSSPYISNKKARHAPGDSVVDLKPDNIVRSVAVPELIWARENEDNGAVHDKYVKTTHKL  
AAKRAAAVDKAQYDHRNQVELSFIGLAVKVLPEKAIHATSGQLMPTASVAVTDMKMGIAATIRLDP  
MEKALIAYIKRMRPQLNLGGQTDKKIVKCLNNNLDDVEYGKLGRRKIKPITIKSVYDVEHRRATELVKL  
MPYKDDVESRKSQFAEK--  
ALFEPLKAFMMLFGYIARAVYALYLRVIRRTILLVKTIVVNASTVLSAIIIGVSIRLRHKSTNVAETNHHI  
KTIEARARMTLAGAGKVKLNLSPGKIGKKGRIKGYMPYKNFNIFDGLASGRRRAKVKELAKLKEVDKTIS  
VDGVRQKQQGGRTPKAQLSNAI-  
NTRVGVDIVGENEQUEESNPRANAEMGQIFAKIDARVFSHVGALIGHALEAVLAVVSIWDIGRAHNLL  
AVRLKINAGIEMHSAA-  
VDTAVAAAAFAQSAGEASVIADISESYLGALAISAMSVDVCRLRRRGLSELKKTKKDAYMSLTFCGGK  
GDKVKIVEATQTQAYEIVATRTAERHGIRAKGTYGKERAMMQILPTKPKVIWVPVFVTEVELLAPIRAF  
AESVGDGVTVVKLTKDIKVTMFEKAVASIAVTGKSTSVVYTVLEKVTMLMKDIIYTQRAKAHYGRGRLR  
SHVVTTKQSRHLSMIKRTVVADPSMDASRLTDGEVTVITGATMAFVMSEQEAV--  
GDVDLHFHEEPRREAIEVIGGGPETFLTTEQPRVLALLAVKAYLIHIVEIGTVNGFSDAATIIDVLRAMQ  
NKLDRKLSADIATRMVLTNDVTDMGVTEVAPRREAAGDKILSAFWINGVTANADIILLVANLEVQC  
APENIDCAIRLFYQRTLQAKERGGDVSAIVPAANQIEAAENTVIYTIKGTPTGTQMKTIEGISRSIV  
KSLAVQLFQVDTFLDDTWIATWLRAALQVVFVGAEDGKEAVDHVVERDTELEFAPQKDIVSRKIRIYT  
PAAPSAVVIWDPAIEREDKAEAQGTILKIYGNLQDINCFTDIGAEPKIESLKAWDEKEKYVVRDDIPE  
DI-  
TLVGKSSKVNKEFAIPDVAVCAPSKPGVTESIDRGEPKAGTCGEVANMAYPQESLVNAVSSANVQKN  
ISMVLSGHPVGEMGISREIERHLETSMCEIFVDKDDVDVALDFYILQLTPLRVGLDPPNARVQIDGKES  
RKLMAIQDGAALQRHPKVSQATGTGLKAGIKARMPDDALMVDGVMHGDISFTATDLPDGRV-

VTPVFNNVKAQLKIDKVLLKAFHVVTLSFSNDKGEEHLIKRLNALKKSTRHYEMLLKIRETECAESPHAI  
SVGKVLKIDALMQTICQAHYKEIPELLADELTALGVMGEQGLLHIVPRLMILAVLQLFRLEIALQIDNW  
GLQAEALVTDQTMGLYLDRDREWSF-AISEVVGNTFFARTKETDTEQKIRARNPV-VLL-LGKFEMI-  
ISPSGLGLASTAESPOERGNAEELILSTERLQDEMGYYVLQILLVFVDEVILAYGSGEGPIKFLVAEQAVT  
GRQNPGMVTLTRRTFPLELQRNATFVMVFEDSTMKNLSHKKMHMNLVVIKSKGWIVNVSTKILISDQ  
AIASYEDAGAHTQPSESALAVITSRVMAPIVLVVSQKPTAPSKTLFLEALSLEYDEVSTVQNKPKKYYIF  
EGDVVAVLGTLDAAVLLGMQRPQPDRMRRAIVADAVRLAIALRASGTITRLEENLINFSAVNFAALF  
Y-SNGA-----EFRVRNHVSTKRSRPYKAHPKFLHKADVVDKGLIATGVDTLA  
>GCA\_001419985  
AVIKPVTMDDYAPVLMIRQQQVATVSGAGSPTLRAKTVYAKSGLQRKSETKWVSKDFYY-  
GVVKLGNIQVLVSISVDKRAVCTVAQLVDQEVVVRGMVALDAVKKKIALEAIQGMATAEDPAKVVDY  
ASEIELRKFRDADDRADMLPVLLGLTLKIKFDPHQPVVHDLPIPVVFEVV-  
GIMVQRGQIEVDECAISTAVSDVDPIVYVSPIDLAAGDKMAYIDQEAANAKQIEIDLEELALESSV  
LVVGI-PLLIPV-FAADGDV-MSFANRSRTLKTIVNLAVSYPAIKRA-----IAAAM-  
MDASQAAAAAEKRGTAEEIRIVKRMQRSSGLADDPELVMLEDAAEGNSNWAGQIYDDPISGSSED  
SAGNIVYAANKRQNFARSITYLRAVEISDPAAAPLMRGVKHNSKSRAARKLDDTIAALNFPNVPEGIAI  
RAEAGKPRDLLLHDATEGEEILLIIVRWVHTWKTAVIISLFPLADNVVGIITMGGIGAVGRKDGLLNRHH  
KLNGLIEQRRIVEKLTLRLRAALKQKLGAEQIIIFVVKVAGDLVAKAKVQM---  
SVGTVVAIQGETIFVRRHRQTVIADQEATV-ILKGVAEGPADAQALLRIRVDHTVVKLSVLLIPD-  
PVLTESVSIREGVGKALQIIQLDVYLLRDMGTGEETLAKSRSEVIREVLQVDDITGVRLAFGQLRERLVK  
GGTMKELG-----  
IAILKNITEPRMANLPAGVCRTFVNAGPRAAVGMIFLLLDEAGKIYTIDGDLRENTKSIKSMIGLVDAAK  
PKTLSAGYATARLKIRYADVTLTSDADLYAYAEERKELLRMVPVYITNQAKRRQLIFALS LKGGHRA  
RAALGVMIAAAILESQAEQGTVNHAEPVLLDDGEIVGSEIMISRQAALDLKQIIKTDIIVIFPEFQEKMV  
VSLKFFCTDVAIFVIALICTVGEMLSREPSHAQEEGAGFQKRIRAHSVLFALAVTFDRRNLRTD-  
TPTLFLNLGLAPPRYGVFYTEQPKRKQMPSEADDDEVDGFDLVNAIKEDGTK-  
EELDMPEAMALAVE-  
DGTINVNAGVLAITGDMAAVEKVD SKRKMALAVEKWTIARVDIADLKISGAAPFRALN-  
IEQADVSATLSNKQVWFLFLPGANNAEMEEAKLDGAGSSTAEEAADKQLGILLINPVLVVIQDSNTA  
GLIANGGLEEWGTMAYKKHYALAARMRLHMRTID----  
GVEMDPNKQKAEIKTVKLEGDTRFRQLATEGVKEQMP-  
LHALNPDAVLVPVLPVTPAVGRVAADAGVLGARVPCDASL-  
RELQKSMKGNALPISGIRLLGMRAARAMVDEDIMVAGKVAA-  
LLVIVALETITHLVLMNDSEATLPWRLSVAERLEADTKRAGGFAARPFKSKPSLCKTQAHAKIADPIQEI  
AAGYVATEDRFVFPVEGIPIQLILASPHSRVGEAKRAGEGHLHEMAKELQAKAVIMVLNEPDTNTEGL  
LNYLTTQQPTDLLFEDCLDVVIDMRRMSVV-----  
VQLNTV-  
HVLVPGVRDLADREIMAAAAHSGLVQIERVDERTGRERTLMWMYGAMEELWLMSVRYADWVWDC  
SIGAILLHVYAQQINRAFSLERLQLAGWPPEASSWWNTWQLWLNKDGFFSYEAAFRAVKAVLKSDL  
DDFDMSDVEGVGRYQSRQQLRVGYRIRQQVAFEQLDPRTDILLQSMTRL SVIRHALTMVAILIVREIV  
VEFTLVAKEDVAMGHVECVLADSFDFTAKDADIGPVGIRTPDPVLGDGTVLKEAVLGKIDLANTVAD  
FRYKMLIDGGRELGVSWVTLQNLISRIWVPPAQAALKNLVPIAFFLGHTELNLAIFPQLWAGISKARA  
NKL MAGALIEKILERVAAFAEPEATTHQSKKIRHFKYYGEEVDPVYLAYILDMFALVATQVTVSDRLLKD  
RYVLNLKIFRGFTSLLWLSAQIGDKGPAATVITVQTIMGLGALVLFILL-RVVVLVETLYKYVY--

MLGYQAAKD VADADPEHFLSLAHASRDVEWVEVIPAFFYYFKTAGSRLTKNTALAKEFFGLFKERLRII  
DVLAVPPDRVEVLVTFVALAGTLATSAQALAGIIACGFCEPNAAAVLEADQDWNLHRSMGITLAFYD  
ARESVKGWFDKGLHKDVAATGLKEAGALTPFHAGATAKQCVPAIHRVLDLGEVEAALIEIDSAVVVA  
DEEQTLADKPTTREN SVGAVGGVVL AGTMNMGANLDSVERGGNIIIEEEEQYSAVNGKKS DGKVT  
DKVVMVLSAAYFPVLKRIASANALDKGAFGLLIDAPDDADNKN DHGRELTIPAPTIH -  
ESAPLYAESEIERIAWIAPLHLLGTLD AVLGFEPDQYSFISMMIDASLEIMETAEVL -  
DYHVLETGSRPPAFRIILIKGLHIRLLAGVCTIIVVGSAGRTEVTAYIQG -  
AVPITLNKKTFLPAFAASSCH AIDIFSTMLRPPERSTIQMLILETVAEL -  
LEVTRIENDKLERMVALLPGLDVASLLDLVAAATDFAAIVTIDQAITAILSVA AEAVVREMLLT LAEIAV  
TALALALALLMLTPDQGLHQKEQAREAQM KALIQQGGVVLQVKAADRMMLASTADKVRLDTDEGT  
TSAFASLN LATVSDGFYVLSSAVLQMTSDLMMIVAVARVLADKETKNALVVRHPEQVKTQSTYAEQS  
PGMVLQTLTGAIPPLAIKPETVELLWTLVAALWRVKAHLANAARPHNERVLILILALS LITVLLQSEGGG  
MGGG--  
GPAAKALAAFSILT IKAKAGDEV RKVARRVMDLNSRLGRPEEAVNPEFRGA ELEQSKYEAENVEVDTM  
ETIRRFVDIPFLVSTRTQHNESED RGARMVLDVTRVRFIDL -  
VTKRSEIILAA RAETDGIIAREMGKDLAALHPEAAALGKIAALQHFI AVQDAHISNYVTAEIHAVLGMILL  
VLFIQEV RVGKVWWPTRREV TMVFIMAALAIFFLVIGLGVQIVFMLS GISWNQLTTIVLGEGIMVVRQT  
STFPEDS -  
IGILQNTYADLICSGRVAKADIEASLHIVVAGRVARGTWYVIYLYEISQAQDQSGIMQRAFRQMTLSQ  
SLIDGRMEVKIKVVTSDRYA -  
TYEIKGGQHRKGTRYNRVKVGHNIPVQVLPRMKMAFGPPNLVLVKTFGAVVQKRFAQAL THIRHGA  
VTIGPMEVSSPYISNKKARHAPGDSVVDL KPDNIVRSVAVPELIWARENEDNGAV HDKYVKTTHKL  
AAKRAAVDKAQYDHRNQVELSFIGLAVKVLPEKAIVHATSGQLMPTASVAVTDKMKGIAATIRLDP  
MEKALIAYIKRMRPQLNLGGQTDKKIVKCLNNNLDDVEYGKLGRRKIKPITIKSVYDVEHRRATELVKL  
MPYKDDVESRKSQFAEK--  
ALFEPLKAFMMLFGYIARAVYALYLRVIRRTILLVKT KIVVNA STVLSAIIIGVSIRLRHKSTNVAETNHHI  
KTIEARARMTLAGAGKVKLNLSPGKVGGKGGRIKGYMPYKNFNIFDGLASGRRRAKV KELAKLKEVDKTI  
SVDGVRQKQGGGRTPKAQLSNAI -  
NTRVGVDIVGENEQUEESNPRANAEMGQIFAKIDARVFSHVGALIGHALEAVLAVVAIWQIGRAHNLL  
AVRLKVNAGIEMHSAA -  
VEIAVAAAAFAQSAGEASVIADISESYLGAL AISAMSVDVCRLRRRGLNELKTKKDAYMSLT CFGGKG  
DKVKIVEATQTQAYEIVATRTAERHGIRAKGTYGKERAMMQILPTKPVKIWVPV FVTEVELLAPIRAFAE  
SVGDGVTVVKLTDKIKVTMFEKAVASIAVTGKSTSVVYTVLEKVTELMKDIIYTQRAKAHYGRGRLRSH  
VVTTTKQSRHLSMIKRTVVADPSMDAARLTDGEVTVITGATMAFVMSEQEAV--  
GDVDLHFHEEPRREAELGIGGPETFLTTEQPRVLALLFLRAYLIHIVEIGTVNGFS DAATIYDVL RAMQN  
KLDRKLSADIAKTRMVLTDNVTDMGVTEVAPRREAAGDKILSAFWINGVTANADIILLVANLEVH CAP  
ENIDCAVRLFYQRITLQAKERGGDVSAIVPAANQIEAAENTVIYTIKGKTPGTGQM KLTIEGISRSIVKS  
LAVQLFQVDTFLDDTWIATWLRAALQVVFVAAEDGKEAVDHVVERDTELEFAPQKDIVSRKIRIYTPA  
APSAVVIWDPAIEREDKAE AQGTILKIYGP NLQDINCFTDIGAEPKIESLKAWDEKEKYVVHRDDIPEDI -  
TLVGKSSKVNKEFAIPDVAVCAPSKPGVTESIDRGE PKAGTCGEVANMAYPQESLVNAVSSANVQKN  
ISMVLSGHPVGEMGISREIERHLETSMCEIFVDKDDVDVALDFYILQLTPLRVGLDPPNARVQIDGKES  
RKLMAIQDGDAAALQRHPKVSQATGTGLKAGVKARMPDDALIVDGVMHGDVSFTVTDLPDGRV -  
VTPVFNNVKAQLKIDKVLLKAFHVVTLSFSNDKGEEHLIKLRLNALKKSTRHYEMLLKIRETECAESPHAI  
SVGKVLKIDALMQTICKAHYKEIEPLLAD ELTALGVMGEQGLLHIVPRLMILAVLQLLTLEIALQIDDWG

LQAEALVTDQTMGLYLRDRAWSF-AISEVVGNTFFARTKETDTEQKIRARNPV-VLL-LGKFKMI-  
ISPSGLGLASTAESPQEQGNADELILSTERLQDEMGYYVLQILLVFVDEVILAYGSGEGPIKFLVAEQAV  
TGSQNPGMVTLTRRTFPLELQRNATFVMVFEDSTMKNLSHKKMHMNLIVIKSKGWIVNVSTKILISD  
QAIASYAEDAGAHTQPSESALAVITSRVMAPIVLVVSQKPTAPSKTLFLEALSLYDEVTSTVQNKPKKYY  
IFEGDVAVLGLTLDAAVLLGMQRPQPDRMRRAIVADAVRLAIALRASGIVTRLDEDLINFRAVNFAA  
LYYPVPK-----EFRVRNHVDVSTKRSRPYKAHTKFLHKADVVDKGLIATGVDTLA  
>GCA\_001420005  
AVIKPVTMNAYAPVLMIAQSQVATVSGAGSPSLRAKTVYAKSGLQRKSETKWVAKDFYY-  
GVVKMANLVQLVSISVDNRAVCTVAQLVEQEVVVHGMVALDAVKKKIALEAIEGMTAEDPAKVVDY  
QTRIAIRKWRDADDRADLLPVLLGLTLKIKFDPHQPLVHDLPIPVVYEVI-  
GIMAQKGTIEVDDCGISTAVSDVDPIAYVSPIDLAAVSGQKMDYIDQEAABAQAKQDIDLEELALESG  
VLVVGIKPLIPI-FRDDADE-MSFANRSRTLKTIVDLAVSYPEQTRAR---IAAAM-  
MDASRAAALAEKRGTAEEIRIVKRMQRSAGLADDPVLMLEDAAEGNSNWAGQIYDDPISGSSES  
AGNIVYAANKRQNFARSITFLRTVEISDQAAAPLMRGVKHNAKSRSRKLDDAIAALNFPNVPEGIAI  
RAAAGKTTATLLHDADQGEQILMLIVRWHVTWKTAIIYILEVAGNIVGLIELGGIAAVGRKDGLLNHRH  
HKLNGSLIEQKRVIDKLTLLRLRAALKQKLGQDQVILVVRVQGDLVAEAEIQMG--  
DVGAVVAIQGPTIFVRRHRQTVIGDQEATV-VLKGVAEGPADAQALLRIRVDHTLVKLSVLLIPE-  
PVLVESVTIREGVGRALQIIQLDVYLLRDMGTGEETLAKSRRELIRELLQIDPITGVRLAYGNLREREAKV  
LNIKEIDTLF--  
LAIQGVTEPRMGNLPEGVCRTFVRAGPRAAAGMLFLILDDAGKIYTIDGDLREITKSIKSLIGLVDAAKP  
KALSAVYMTERLKIRYEDVHVLISDADLYAYAEARRELLRMVPVYITNQAKRRQLVLLALSRLRGHRRV  
RMAIDVMIAAAIIESQAVNGAVHHAEPRIILLDDAEVVGSEMMINRQAALAMKEVLKVDVIVIFPEFQE  
KMVVSRLFFCTDVAIFVIALICTVGAMLSREPSHAQESGAGFQK---AHSMLFALRATFDAQNLRDA-  
-ADLFIRLGLAPPRYGILYTVRPRKQMPSEPDADKVDGFELVHAVKEDGRDN-  
KLDMPPEAMALAVE-  
DATINVSGGVLAMDGDMAAIEKVDSKRKLALAVTKWNIARVSILDTISGARPIRAFD-  
IAIAQVTAALGEKAVS-  
LYLPKANNAELEADKIDGAGSSTVDAAADRQQGILLNPVLVVIQDSNTAALISNEGLDEWGTMAKY  
KHYAYAARMRLHMRTIDGIEGVAMEPNKQKAEEKIKTVKLAGDTRFRQLATEGVKEQMP-  
LHALNPDAFV-LAVLVTPAVGRVAADQDVLGARVPCDASL-  
RELQKSQKGDALPISGIRLLGMRAARAMVEEDIMVAGKVAASLLVIVAVETICKMVLLNDSEATLPWR  
LSVAERIEADTARAAGYAARPFMSKPSLCKVQAHANVADPIQEIAAGYVASEQRFVFPVEGLPIQLILA  
SPHSRVGAACKRAGLGHLEMAKELIGKADLMVQAASDTNTEGILNYLTTRQPTDLLHDDCLDIVIDM  
RRMSVV-----VQLNTV--  
VVVSGVRDVGAYEIMQAAAPSGLIQVERIDDRTGRERTMMYMYGAMEELWLLSVRYADWVVDCAI  
GAIVLHVYAQVINRAFSLERLQLAGWPPEASRWWNTWQLWLNKDGGFFGYEAAFRAQAAVLSAALY  
DYEMTDVEGVGRYPSRQELRVGYRIRAQVAFDRLDPRTDILLQSRTLSVIRHALEVVAIMIVREIVIEFT  
LVVAQEDVAMGHVECVLADCFDFTAKNADIGPVGLKTPDPVLGDGTVLNDVAVLGKIDLANTVADFR  
YRMIDDGGRQLGVEWLTLRNLLVGRIWLPPAEAAKNLQPICFFLGHPDLNLQLLVALWAGISKARM  
QALMASALIEQILDKVAAFADPDATTHQSNKVKHFKYYGEEVDPVYLAYILDVFALVATQVTVSDRLL  
KDRYVLNLKV-RGFTSLWWLGAQLATKSPAATIIALDSIAGLGALVLFILL-RDSVLVETLYRYVY--  
MKGYEAAKDVADADPEHVLNLAASVRDVEYIEIVPAFFYYFKTAG-  
FEPFNTAVAREFFGLFKERLRVIDVLVPPDRVMSLVAFVALAGTLTTSAEALPGIATGLCEPNAASVLE  
ADQDWNLHRSMGITLAFYDARESVMGWFDKGLHKDVAQTGLSEAGALTTPFHVAVTAKACVPPIHR



VLDLGEIEASLIEIDSAVTVADEEQTLADKPTTRDNSVGAVGGVVLAGTMNMGANLDSVERGNIIIEL  
EEESYSAVNGKKD-GKLTDKVLMV-----FVVMERIASANALDRGAFDLLIDVPDDADNRDQGWEL-  
-----PDQYSFISMMINASLDMQTAEV--  
DYHVLEKGSRPPAFRVILIKGLHVRNLAGIATIIVVGSAGRSEVTAYIQG-  
AVPITLKRVTFLPAFAASSCHVIDIFSTMLRPPERSTIKMLILETVAEL-  
LEVTRLENDKLERMEVLLPGLDMAQLLPLEAAAADFPQIVTIDASIVAILSVA AEPPVLRDMLLSLAEIA  
VEAMALALALLMLTPDQGLTQKETSREAAQMKELIQGGVVLQVRAADRMVLAATADKVRDLDG  
TTSASFASLNLATVSDGFYVMSSAVLQLSSDLMMIISVARVLADKEHKNALVVRHPEQVKTQSTYAE  
PGMVLQTLTGAIPLAIKAEVEELLWTLVTALWAVKAHLANATRPRNERVLILALTLITVLLQSEGGGI  
GGG--  
GPPAKGLAAFSILTIAKAGDEVKVRTRRVLNLSRLGRPEESVNPEFRGAELEQSKYEANVEVDME  
TIRRFVDIPFLVSTRTQHNESEDRGARMVLDVTRVRFDL-  
VTKKSEILAAARETDGIIAREMKGDLAALHPEAAALGKIAALQHFAIQDAHISNYVTANIHSVLGMLLL  
VLFINETRIAKVVWPTTRREVTMVFIMAALATFFLVIGLVISIVFMLS GISWNQMTTIVLGEGVMAVRQTS  
TFPKDS-  
IGILQNTFADLICSGRVAKADIEKSLHIVVAGRVTRGTWYVIYLYEISQAQSPAGIMQRAFRQKTLSSQLI  
DGRMEVKIKVVTSDRYAQTYEIKGGQHRKGTRYNRVKVGHNIPVDVLPKMAFTPPNLLVVKTFG  
AVVQKRFASALTHMRHGA VQIGPMEVSSPYIRNKKARHAPGDVVDLKP ELIVRSVAVVPELIWARE  
NEDNGAVHDKYVKPTHKLKAKRTTAVDKAQYDHRNQVEMSFGLAVKVLQPQKAI VHATAGMLMPT  
TSVAVTEGMKGIAATIRLDPMEKALIAIYIKMRMPQLNLEGRD KKKIVKCLNNNLLDVEY GKLGRRIKPI  
TIKSVYDVESRRATELVKLLPYKDDVEGRKSQFAEK--  
ALFEPLKAFMMLFGYIARSVYALNLRVIRRTILLVKCKIVVAAATVLSAIIIGLSIRLRHKSTNIADTKHHIK  
TIEDRANLT MAGAGKVKLNL SAGKVGKKGRIKGYMPYNNYNIFDGLASGRRAKVKEVAKLKKVDKEI  
KVEGIRVKQEGGRTPKAQLSNAVANTRVGV DIVGEKIQEQSNPRANAEMGQIFAAIDARVYSHV GAL  
IGHALEAVLAIVAIWGIGRAHNLLALKLRINAGIEMHSAA-VTRAVACA-  
FAAPAGDASALWDASEAYLGAIATEHAVDTCLRRRSLSELKTKKDAYMSLT CFAGKGDRKIVEAS  
QTQAYEIVATRTAERHGIKAKGTFGKERAMMQILPTKPVKVVVPV FVDEVELLAPIRNF AETVGDGVT  
VVKLQNDIKITPF EKAVASIAVTGKSTSVVYTVLEKVT ELSKDIIYTQRAKAHYGRGRLRSHVVTHTKSSR  
HLSMMKRTVVADPSMDAARLTDGEGSVVTGATMAFVMSEQDAV--  
GDVDMHFHEEPRREADLGIGGPETFLATEHPRTLAVLFLRAYLIHIVEIETTKDFSNAATYDVL RAMAN  
KLDRKLSADIAKTRMVLVDNLMDMGVTEVAAKRDAAGDKILSAFWINGVTANADIVLLVANLEVPTV  
PENIHCAIRLFYQRITLQAKERDGDVSVAVVPANKQIEAAEDTVIYSIKGKTPGNAQM KLTIEGISRSVV  
KSLAVQLFQVDTFLDDTWLGTLLRAAIDVVFVDAGETKEAVDHVVERDTEYEFAPQKDIVSRKIRIYTP  
AAPSAVVIWDP AIDREDKADAQGTILKIYGP NLQDINCFDIGAEPKIESLKAWDEKEKYVVHRDDIPE  
DIDTLVGKSSKVNKEFAIPDVAVCAPSKPGVTESIDRGEPKAGTCGEVANMAYPQESLVNAVSSANV  
QKNISMVLAGHPVGEMGISREIERHLETNMCEIFVDKADVDVALDFYILSLTPLRVGLDPPNARVSDG  
KESRKLMAVMDGDADLQRHPKVSQATGTG-NASIKARLPDDTLIVDGVVHGDVSFTATDLPEGRV-  
VTPVFNDVKAQLKIDKVLKAFHVVTLSFSNGKGEDHLIKLRLNALKKNTRHYEMLLKIRETECAESPHAI  
SVGKVLKIDSLQLTICVAHYKAIPELLADDLTALGVMGHQGLLHVVPRLMILAVLHLWGMAAA MEVA  
QWGLQANA-VTDQTMGLAMRERHFTY-SISEVVGNTFFAKTKEDDTEQRLHARNPI-VLL-  
AAKFGMV-  
ISPSGLKLTSTQASALGRENAEDLILSTERLQDAMGYVLRILLVFVDEVILAYGSGEIPKFLVGDQAVT  
GRQNP GMVTLTRRTFPLDLQRHAVFVMVFEDCTMKNLSHKKMHMNLILIKSGWIVNVSTKILISDQ  
AIASYAEDAGAHTQPSESALAVITSRVMAPIVLVVSQKPTAPSKTLFLEALALYDEV TATVQNPKPKYYI

FEGDVVSILGACDAAVLLGMQRPQPDRMRRAVVADAIRLAIALRASPIITRLEAGLINFARSVSLAAG  
VYIQFQTPP-APMP-PALAFVRNHSVSTKRSKPYKGHTKFLHKADINKSLIAAGVDTIA  
>GCA\_002150005  
AVVKPVTMSAYAPVLLIKQQQVATVSGAGSPSLRAKTVYRKSGLQKRTSTKWVAKPIYY-  
GVLKMGQIVQLVSISVDNRSVCTVAQLVEQDVVVHGMVALEAVKKKIALQEIDGMTSEDPKVVVDY  
-  
DAIALKRFRDAEDRADLLPVMLGLTLEIKFDPHEPLVHDLAIPVIFEVSTVMAQKGTIEVDDCGISTAIS  
DVDPVAYVSPIDLNVVAGDQMAYIDQEAAVAAAKEAVALEELALESNVLVVGI-PLLIPV-  
FEKDGGT-MSFANRSRTLKTIVDLAVSYPQMERARIGVSIASAM-  
MEAAQAAAALSEKRGTAEEIRIVKRMQKSSGLADNAELVILEDAAEGNSSWAGQIYDDPISGSSESDSA  
GNIVFAANKRQNADRSITFLRTVEISDKAAAPLMRGVKHNSKSRASRKVDDAIRELNFANVPEGIAIRA  
EAGKPQDMLLHDAEEGEEILMIIVRWGVTWKTAILILLAVTAGNVVGVIEISGIGAVGRKDGLLRHHK  
LNGSLIEQKRVMKDLTLRLRAALKQKLGAEQVILVVKVAGDLVADAKIQM---  
SVGAVVAIQGETIFVRRHKQTVITDQEATVEVLRGVAEGPADAQALLRIRVDHTVVDLSVLLIPEVPVL  
VDSVSIREGVGKALQIIQLDVYLLRDMGTGAETLAKSNSRELLRDVLQVDPITGVRLAYGHLSERLTRGI  
TLKKLR-----  
LSILFGVTEPRMRNLPEGVYRDLVEAGPQAAVGMIFLLDDAGKLYLIDGDLRELSKGIKSLIGLVDAAR  
PKVLSAQYLTAKLKIRFADVMVLNSEADLYAYKEERKELLRMVPVYIVNAAKRRQLIIMALSLSRSGHKR  
AGAAIRVMLAAAIIESQQTRGEVHHHEEPEVLLDDAEVVGTEVMISRQASLELKEILKVDILVVFPEFNEK  
MVVSLKFFCTDVAIFVIALICTVGQMLSREPSTAQEGGAGYGKRIRKHSVLFALSVTFDRRNTDA-  
TGDLFLTGLIADPRYGVFYTNQPKKKQMPSEPDDDKVDGFDLVNAIKADGAE-  
QALDLPEAMALAVE-  
DATINVSAGVLALSAEMAAIERIESKRKIALAVEKWTIAKVDVLDIHISAAAASFRGLD-  
IEQADLSAALGSKQI-  
FLFLPGANNADLEEDRLNGAGASTIDVAEDKQNGILLVVPVIVVIQDSNAASLVANGGVEEWGTMAY  
KKHYAFAARMRLHMRTIDAIEIGVALDPNKQKAEEKIKTVKLDGDTFRFRQLAVEGIKEQMP-  
LHALNPDAFV-LAILVTPAVGRVAADEEVLGAKVPCDFSL-  
RELQSMKGQALPISAIRILGMRAARAMIEEDIMVAGKIAA-  
LLVIGALETILKIVLLNDTEATIPWRLSVAERLEADTKRDGGFASRPFNSKPSLCNIQAHANVADEIQEIA  
AGYIAMSNNRFVPVEDIAIQLILANPHSRVGTEKRAGEGHLHEMAKELKAKAAIMIRGEPNTDTEGIKT  
YLTTTRQPTDVLMPDCLDLVIDLRRMNVV-----  
IQLNTV-  
HPVVPGVGDIKYEIMAAAFPSGLVQTEQVDDRTGRERTMMWWMYGSMEDLWLMSARWADWVV  
DCAIGAILHVYAQSINRAFSLTRQLDGWPKADRWWNTWQLWLNKDGFFGYEAAAFRA-  
LQVLKAELYDFEMKDVNGVGGRYQSRQELRVGYRIRQNVDFEKLTPRTDILLQSQSRLSVLRHALKVVA  
ILIIRDFVVEFTLVVAQEDVAMGHVECVLADCFDFTKKNADIGPVGLRTPDPFGDGTVEFKDAVLGKID  
LANTIADFRYLFIDGGRELGVWWVTLQNMLYERIWLPPAAAKLKDLPICFFLGHPVDL-----  
ISKARAQRLMAGALIEQILDMVAAFAEPDATTHQSKKEKHFKYYGEEVDPVYLAYILDMFALVSTQVT  
VSDRLLKDRYVLNLKI-  
RGFTSVMLLCAQLGNKSPAATIITVGTIAGLGALVLFILLMRDSVLIETLYRYVY--  
MQGYDAAKDAADADPEHLLVLAHATRDVEWIEVPAFFYYFKTAK-  
FEPFNTAVAKEFFGLFEERLRVVDVLVAPPDRVEAIVAFVALAGTLATSAKALVGIIACGFCEPNAAA  
EADQDWNHLHRTLGITLAFYKAQESVKGWFDKGLHKAVAESLPEAGALTTPFHAGKEAKVCVPAIHR  
VLDLGEIEAALIEIDSAVVVADEEQTLADQPTTREKSVGTGGVVLVAGTMNMGAALDQVERSGNIIEL

EEEQYHAVNGKKGDGKLTDKILMVLSAAYFPVMKRMTSANALNRGVFELLIDAPDDADNQDHGGE  
LTIPAPTIH-ETTPLYAESEIERIAWAPIHMLGTLPAVL-  
FEPDQYGFISMMIEASLDITATAEVLDDYHVLEKGSRPSAFRVILIKGLHIRQMAGIGTIIVVGSAGRSEV  
TAYIQH-AVPITLRRNTFLPAFAPSSCAVDIFSTMLRPPERTIETLILETVSEL-  
LEVTRIENEKLERLLTLLPGLDMAELLELMAAAADFADIVTIDAAIAAILSVAEEAVVLRLLLLNLAEIAVT  
ALALALALLMLTRDNGLTQRETAREAQMKAIIQGGVVLQIRAADKMVLASTADKVRLNTDEGTTSA  
FASLNLATVSDGFYVLSSAVLQLSSDLMMIVAVARVLADKESKNALVVRHPEQVKTQPTYAEGSPGM  
VLQTLTNAIPPLAIKPEEVELLWTLVAALWRVKAHLASAARPHIERVLIMILALALIVVLMQSDGGGMS  
GG-  
ASGAAGLAASFLLTIKAKAGDEVKVTTRVLDLNSRLGRPEEAVNPEFRGAELEQTKYEAENVEVDC  
METVRRFVDIPFLVSIRTQHNESEDGRARLVLDVTRVRFIDL-  
VTKRSEIILAAARVETDGIIARDMAGDLQALQPELAALGKVAALQHFAIQDAHISNYVTAAIHSVLGLLL  
LVLFIIQQTRIAKVWVPTREVTMVFIMTVLALFFLTIGL--  
QIVFFLSGISYQKLTTILLGEGVMAVRQTTTTPADSFILQNTYADLIAAGRVAKADIENSLHIVVGGRV  
ARGTWYVIYLYEITQAQQQSGIFQRAFRQATLSQSLIDGRAEVKIKVVTSDRYA-  
TYEIKGGQHRKGTRYNRVKVGHNPVQLLTRIKMAFGDPNLVLVKTFGAVVQKRFAQPLTHIRHGAV  
TIGPMEVSSPYIKSKKARHAPGDSVVDLKPNDVVRSAVVPELIWARENEDNGAVHDKYTKTTHKLA  
AKRRRAVDKAQYDKRNQVELSFIGLAVKVLPEKAIVGSTAGTLLPTGTVSVTENLKGVAATIRIDPMEK  
SLIAYIKMRPQNLNLAGSKDKIVKCLNNNLDDVEYGKLGRRRIKPLTIKSIYDVESEKATELVKLFYKD  
DVEGRQSQFAEK--  
AIFEPLKAFMMMFGFIARAVYALSLRVVVRTILLVKTIVVNANTVLSAIIIGISIRLRHKSTNVADTNHH  
IKTIEARARMTLAGAGKVKNLNRPGRVGKKGRIKGYMPYKNYNIFDGLESGRRAAVKELAKLKTVDKE  
ITVDGIRTRQ-  
GGRLPKAQLSNAIANSRVDVDIVGENEQQQSNPRANAEMGQIFAAIDARVYHLVAALIGHALEAVL  
AIAIWIWIGIGKAHVLLAVKLKINAGIEMHSAA-VDRAVACA-  
FAKSGGEATTFADVSEGLGAISISEDSLDTCRLRRRSLSELKTKKDAYVSLTCFSGKGERVKILEASQT  
QAYEIVSTRTERHGIHAKGTYGKERAMMQILPTKPKVWVVPVFNEDDELLAPVAAFAETNGDGVTV  
VKLTKDIKVTMFEKAIASLAVAGKSTSVVYTVLEKVTTELAKDIIYEQRAKAHYGRGRLRSHVVTHTKSNR  
HLSMIKRTVVASPRMNAARLHDGEVSVVTGATMAFVMSEQDAV--  
GDVDMHYHEEPRREADLGIAGPETFLTDDQPRVLALLFLRAYLIHIVIDIESVNGFATAATIIDILRAMQ  
NKLDRKLSADIKVRMCLHDDVADMVGTDEAPRRDEAGDPILSAYWINGVPANADIILLVANLEVET  
APENIDCAVRLFYQRITLQAKERNGDVSIADVPAQNQIEAAEGTIYTVKGNNPGTAQMMLNVEAISR  
SIVKSFAVQLFQVDMFLNDTWLGTLLRAAEVVFVQAEESKEAVDHVVERDTELEMAPQKDIVARKIR  
IYTPAAPSAVVIWDPAIEREEKADAQGTLKIFGPDLDIACFTDIGAEPKIESLKAWDEKEKYVVRDDI  
PEDIETFVGKSSAVNKEFAIPDVAVVAPAKPGVTESIDRGEPKAGSCGEVANLSYPQESLVNAVSSANV  
QKNISMVLQGHVPVGGELGISRSVERHLETTMCEIFIDSPDIDVAMNFYTLSTPLRVGLDKPNAKVEIDG  
RESRKLMAVLDGEAELQRHPKVSEATGLTMNAGVKAKLPDDALIFDGVQHGDKFTNTDLPEGRV-  
VTPVTLVKVAQLEIDKVLKTFHVLTSFSNDKGEHKLRLNALKKNTRHYEMLLKIRETECAESPHAIS  
VGKILKIDALLQTICQAHYTAIEPLLAEDLTALGVMGDQGLLHVVPRLMIMAVLDLANVEARMFIHRW  
ALMAEACVTDETMGLDVREWERWY-AISEVVGNTFFARTAEDDTEQRLHARNPI-VLL-YGKFDMV-  
ISPSGLKLASTQPSLEGEGNEAQVILSADSLQDEMEYVLELLLVFVDEVILAYGSGEPIKFLVAEQAVT  
GRANPQMVTLTR-  
TFPLDLQRDATFVIVFEDSTMKNLSHRKMHMNLVLIKSGWIVNVSTKILISDQAIASAEADAGAHTQ  
PSESALAAITSRVLAPIVLVVSQKPAAPSKSLFLEALALYDAVTATVLNKPKEYIFEGDVVSVLGALDAS

VILGMQRPQPDRMRRAVIALAIRLAIAARASGSVATLSNDLVNFSRAVNFVSRIYTPQT-----  
-EFRVRAHKVSTKRSPYKAHTKFLHKAELEKSLVAEGVDTLA  
>GCA\_002158905  
AVIRPVTMKTYAPVLMIAQSQVATVSGAGSPSLRAKTVYAKSGLQKAEWKVVVDFY-  
GVVKLGLVQLVSVSDNRAVCTVAQLVEQEVVHGMVALDVVKKKIALEAISGMTAEDPAKVDF  
AGELELRKFRDADDRADMLPILLGLTLKIRFDPHQPLVHDLPIPVVFEV-  
GIMVQRGTEIENDECAISTAISDVDPVIVVSPIDLAAVAGDKMAYIDQESAVSAAKADIAL--  
LAESAFLVLSI-PLIPV-FAADADV-MSFANRSRTLKSIVNLAVSYPAIKRA-----AAAL-  
MEASQAAALAEKRGTAEQIRIVKRMQRSAGLADDPDLVLEDAEAGNSNWAGQIYDDPLSGSSES  
SAGNIVFAANKRQNFQRSITFLRKVEISDQAAAPLMRGVKHNAKSRSARKVDDTIAALNFPNVPEGIA  
IRAAAGSQIHVLLHDATEGEEILMIIVRWHTWKTAIISLFPTAGDIVGLIALGGIGAVGRKDGLLRHH  
KMNGALIEQRRIVEKLTLLRLRAALKQKIGAEQIIIFVVKVAGDLVAKAKIQM---  
AVGAVVAIQGETIYVRRHRQTVADEEDATVEVLRGVAEGPADAQALLRIRVEHTLVKLSVLLIPE-  
PVLVESVSIREGVGKALQIIQLDVYLLRDMGTGEETLAKSRREMIREILQVDPITGVRLAFGILRERLVKG  
GTMKELGTLL--  
IAIIDKITEPRMANLPDGVCRFTINAGPRAAVGMIFLLDDAGKIYTIDGDLRELTKSIKSLIGLVDAAPKI  
MSAAYAAARLKVRYADVTVLVSDANLYAYAEERRELLRMVPVYITNAAARRQLIIFALSRLGGHRRAR  
AAIGVLIAAAILESQAAQGAVNHAQPAVLLDDGEIVGSEMMISRQAALDLKQIIKTDVIVIFPEFQEK  
VVSLKFFCTDVAIFVIALICTVGAMLSREPSSAQEDGAGFQKRIRAHSVLFALVATFDRRNLRTS-V-  
NLFLALGLAPPRYGYLYTEQPKRKQMPSEPKDEVDGFDLVHAIKEDTAS-QELDMPEAMALAVE-  
DATINVTAGVLAMTGDMAAMEKVDSKRKMALAVTKWTISAEIVDILISGAHPFRVLG-  
IESADVSAGLPQKAIWFLFLPGANNAEMEEKLDGAGASTAEAAKNKQTGILLVNPVLVVIQDSNTAA  
LIANGGMEEWGTMAKKHYALAARMRLHMRITD-----  
QMEPNKQKAEKIKTVKLEGDTRFRQLATEGVKEQMP-  
LHALNPDAFLVLPVLPVPAVGRVAADEQVLGARVPCDASL-  
RELQKSMSEALPISGIRLLGMRAARAMVDEDIMVAGKVAA-  
LLVILALETITHLVLRNDSEATLPWRLSVAERLAADMKRASGYAARPFQSKPSLCNTQAHAKIADPIQE  
AAGYVAKPERFVFPVEGIPIQLILASPHSRVGSAKRAGLGHLEMAKELHAKAVIMVLNEPDTNTDGLL  
NYLTTQQPTDLLFEDCLDVVIDMRRMNVV-----  
VQLNTV-  
HVVIPGARDLADREIMAAAAPSGLVQVERVDDRTGRERTLMWWMYGAMEELWLLSLTYADWVNC  
AIGAILLHVYAQVINRAFLSLDRLQLAGWPRAHRWWNTWQLWLNKDGFFGYEAAFRVLAVLSAD  
LDDYEMSDVEGVGRHLSRQQLRVGYRIRAQVAFALQDPRTDILLQSRTRLVIRHALAMVAILVRDIV  
VEFTLVAKEDVAMGHVECVLADSFDFTAKDADIGPVGIRTPDTVLGDGTVFNEAVLGKIDLANTVA  
DFRYKMLANGGRELGVSWITLQNMLYARIWLPQAALKNLVPIAFFLGHTELNLAIFPALWAGISKA  
RAQKLMAGALIEKILAKVAAFADPEATTHQSKKAPHFKYYGEEVDPVYLAYILAVFALVATQVTVSDRL  
LTDHYVLNLKI-RGFTSLLWSAQIADKGAATVITVDTIMGLGALVFIILL-RASVLVETLYRYVY--  
MLGYQAAKDADADPEHFLSLAHASRDVEYIEIIPAFFYFKTAT-  
FEPFNTALAREFFGLFEERLRII AVLAVPPDRVLDLIDFVALAGTLPTSADASPGVIACGFCEPNAAGVLE  
ADQDWNLHRSMGITLAFYDARES VKGWFDKGLHKDVAATGLREAGALTTPFHAGATAKQCVPAVH  
RVLDLGEVEAALIEIDSAVLVADEEQTLADKPTTRENSVGAVGGVVLGTMNMGMANLDSVERAGNIII  
ELEEEHYSVNGKKADGKITDKVLMVLSEAYFPVLRRMASANALDKGRFGLLIDAPDDADNQDHGRS  
LTIPAPSVHSESAPLFAETEIERIAWIPIHLLGLTDAVLGFEPDQYSFISMMIDASLNIMKTAEVLLDDYH  
VLEKGSRPPSFRIILIKGLHIRLLAGICTIIVVGSAGRAEVTAYIQG-

AVPITLNKQTFLPFAAASSCHAIIDIFSTMLRPPERSTIQTILILETVTEL-  
LEVTRLENDKLERMETLLPGLDIAELLGVVAAAGDFTAIVTIDRAITAILSVA AEAVVREMLLT LAEIAVT  
ALALALALLMLTPDQGLHQKD HARES QMKDLIQGGVVLQV KAAERMMLASTADKVRLDTDEGTT  
SAFASLNLATVSDGFYVLSSSVLQMSSDLMMIIKVARVLADKETKNALVVRHPEQVKTQSTYAE GSPG  
MVLQTLTGAIPLAIKPEAVELLWTLVAALWKVKAHLANAARPHRERV LILILALS LITVLLQSEGGGMG  
GG--  
NPPAKMLAAFSILT IKAKAGDEV RKVTRRVMDLNSRLGRPEESVNPEFRGAELEQSKYEAENVEVDTM  
ETIRRFVDIPFLVSIRTQHNESEDRGARMVLDVTRIRFIDL-  
VTKKSEIILAARAETDGIIAREMGKDLAALHPQAAA LGKIAALQHFI IQDAHISNYVTADIHAVLGMLL  
LVLFIQEVRVAKVWVPTRRREVTMV FILAALAVFFLVIGLGVQIVFMLS GISWNA LTTIVLGEGIMVVRQT  
STFPEDS-  
IGILQNTFAELICSGRVAKADIENSLHIVVAGRVARGTWYVIYLYEISQAQGGQSGIMQRAFRQMTLSQS  
LIDGRMEVKIKVVTSDRYA-  
TYEIKGGQHRKGTRYNRVKVGHNIPVQVLPRMKMAFTPPNLVLVKTFGAVVQKRFAQAL THIRHGA  
VTIGPMEVSSPYIQNKARHAPGDAVVDLKP DNIVRSVAVVPELIWARENEDQGAVHDKYVKTT HKL  
AAKRKKAVDKAQYDHRNQVALSFIGLAVKVLP EQAIVHATSGQLMPTASVAVTEGMKGIAATIRLDP  
MEKALIAYIKRMRPQLNLAGKQDKKIVKCLNNNLDDVEY GKLGRRKIKPLTIKSVYDVESRRATELVKL  
MPYKDDVESRKSQFAEK--  
ALFEPLKAFMMMFGFIARAVYALYLRVIRRTILLAKTKVVVNADSVLSAIIIGVSIRLRHKSTNVAETNH  
HIKTIEKRARMTLAGAGKVKLNLSPGKIGMKGGRIKGYMPYKNYNIFDGLASGRRRAKVQDLAKLKNVD  
KTIAVDGIRQKQGGGRTPKAQLSNAI-  
NTRVGVDIVGENEQEESNPRANAEMGQIFAAIDARVFSHVGALIGHALEAVLAVVTIWGIGRAHSLLA  
VRLHINAGIEMHSAA-VPQAVAAA-  
FAQNAGEASLIADVSEGLGALAVTAMSVDVCRLRRRTLAELKTKKDAYMSLTCFGGKGDKVKIVE  
ATQTQAYEIVATRTAERHGIRAKGTYGKERAMMQILPTKPKVIWVPVFVSEEELLAPIRAFAETQGDGV  
TVVKLT KDIKVTMFEKAVASLAVTGATTVVYTVLEKVT ELMKDIIYTQRAKAHYGRRLRSHVVT TTK  
QRRHLSMIKRTVVADPSMEAARLTDGEVSVITGATMAFVMSEQEAV--  
GDVDLHYHEEPRREVQFGIGGPETFLTTEQPRLLAVLFLREYLLHIVEIGTTNGFADAATIYDVL RAMVH  
KLDRKLSADIAKTRMVLVDDLMDMGVTEAAARREAAGDKILSAYWINGVTANADIVLLVANLECP CV  
PENIDCAIRLFYQRITLQAKERGGDVS VAVVAADKQIEAAEGTVIYSIKGKTPGTAQMKL TIEGISRSV  
KSYAVQLFQIDTFMDDTWIATWLRAADDVVFVAAEDGKEAVDHVVERDTAVEFAPQKDIVSRKIRIY  
TPAAPS AVVIWDPAIDREDKAE AQGTILKIYGP NLQDINCFTDIGAEPKIESLKAWDEKEYVVRDDIP  
DDIDTLVGKSSKVNKEFAIPDVAVCAPSKPGVTESIDRGE PKAGTCGEVANMAYPQESLVNTVSSANV  
QKNISMVLAGHPVGEMGISREIERHLETNMCEIFVDKADVDVALDFYTLVLT VLRVGLDPPNARVQID  
GKESRKLMAIQDGE GALQRHPKLSAATGTGLGAGVKARMPDDALILDGVVHGALSFTATDLPAGRV  
-  
VTPVFNTVKAQLKIDKVLLKSFHVVTLSFSNNKGEEHLVKLRNLALKKNTRHYEMLLKIRETECAESPHA  
ISVGKVLKIDKLLQTICIAHYKAIPELLADDLTALGVMGRQG LLHVVPRLMILAVLHLM--  
QCAMILPAWGLQQRALITDQTMGLAIRARAWGY-AISEVVGN TFFARTKEDDTEQRIHARNPV-  
VLL-LGKFTMT-  
ISPSGLGLQSTPESDQDLGNAEPLILSPERLQDEMGYYVIAILLVFVDQVILAYGSGDEPIKFLVADQAV  
TGKQNP GVMVTLTRRTFPLELQRDATFVMVFEDSTMKNLSHKKMHMNLVLIKSRGWLNVNSTKILISD  
QAIASYAEDAGAHTQPS ESALAVITSRVM APIVLVVSQKPTAPSKSLFLEALALYDAVTATVLNKP KKYF  
IFEGDVSVLGGDLAAVLLGMQRQP DAMRRAIVAAAIRLAIALASGIITRLEQGLINFSRAVSFTQG

AYPL-----AFRVRNHADVSTKRSPYKAHTKFLHKADV DKS LIAEGVDTLA  
>GCA\_002797915  
AVIKPVTMDKYAPVLMIRQQQVATVSGAGSPSLRAKTVYRKSGLQRKSETKWVSKDFY-  
GVVKLGNIQVLSISVDKRSVCTVAQLVDQEVVHGMVALEAVKKKIALEAIEGMTAEDPAKVVDYA  
SEIELRKFRDTRADMLPVMGLTLKIKFDPHQPLVHDLPIPVVFEV-  
GVMVQRGQIEVDECGISTALSDVDPIVYVSPIDLA AVAGDKMAYIDQEAAVTA AKAEIELEALESQV  
LVVGI-PLLIPV-FEADGDV-MSFANRSRTLKTIVNLAVSYPAIKRA-----IAAEM-  
MDASQAAAAAEKKGTAEEIRIVKRMQKSAGLADDPELVMLEDA AEGNSNWAGQIYDDPISGSSED  
SAGNIVFAANKRQNFARSITYLRTVEISDQAEAPLMRGVKHNAKSRSSRKLNDIAVLNFPNVPEGIAI  
RAEAGRPRDLLLHDATEGEEILLIWRWHVTWKTAVVISLF-  
QADNIVGIIEMGGIGAVGRKDGLLRHHLNGLSLIEQRRIVEKLT LRLRAALKQKIGKEQIIIFVVKVAGD  
LVAKAKVQM---  
SVGTVAIQGETIFVRRHRQTVIADQEATVEVLRGVAEGPADAQALLRIRVDHTVVKLSVLLIPD-  
PVLTSVTIREGVGKALQIIQLDVYLLRDMGTGDETLAKSKSREVIREVLQVDDITGVRLAFGQLKERLV  
KGGTMKELGTL---  
IAILKRITEPRMANLPDGVCRFTINAGPRAAVGMIFLLLEDKGKIYSIDGDLRENTKSIKSMIGLVDAAKP  
KTLSAGYATARLKIRYADTVLTSDADLYAYAEERRELLRMVPVYITNEAKRRQLIIFALS LKGGHRRAR  
AALGVMIATAILESQAKQGPVNHKDPDVLDDGEIVGSEIMISRQAALDIKQIITDIIVIFEFQEKMVV  
SLKFFCTDVAIFVIALICTVGEMLSREPSHAQEEGAGFQKRIRGHSVLFALAVTFDRRNLRDA--  
PQLFLELGLAPPRYGVFYTEQPKRKQMPSEDDKKQVDGFDLVAAIKEDATK-EELDMPEAMALAVE-  
DGTINVNAGVLAMTGDMAAVEKVDSKRKMALAVEKWTIATVALVDLKLSGARPFRACK-  
IEQADV SATLPKKQVWFLFLPGANNAEMEEELDGAGSSTAEEAEDKQLGILLVEPVLVVIQDSNTAS  
LIANGGMEEWGT MAYKKHYAFAARMRLHMRTID-----  
VMDPNKQKAEIKTVKLEGDTRFRQLATEGVKEQMP-  
LHALNPDAVLVPLVTPAVGRVAADAGVLGADVPCDASL-  
RELQKSMKGNALPISGIRLLGMRAARAMVDEDIMVAGKVAA-  
LLAIVALETITHLVLMNDSEATLPWRLSVAERLEADTKRAGGFAARPFNSKPSLCKTQAHAKIADPIQEI  
AAGYVATDERFVFPVEGIAIQLILASPHSRVGA AKRAGLGHLEMAKELMGKAVVMVLNEPDTNTEG  
LLNYLTTQQPTDLLFEDCLDVVIDMRRMSVV-----  
VQLNTV-HVLVPGVRDLGDREIMAAAAHSGLVQIERVDERTG-----  
-----  
INRAFSLERLQLAGWPPEASSWWNTWQLWLNKDGFFSYEAAFRAVKAVLKADLDDFDMSDVEGVG  
RYQSRQQLRVGYRIRQQVAFEQLDPRTDILLQSMTRL SVIRHALPMVAIMIVREVVEFT-  
VVAKEDVAMGHVECVLADSFDTAKDADIGPVGIRTPDPVLGDGTVMKEAVLGKIDLANTVADFRYK  
MLVDGGRDLGVS WVTLQNL MYARIWVPPAQAALKNLVPIAFFLGHTELNLAIFPGLWAGISKARAN  
KLMAGALIEKILEKVA AFADPEATTHQSKKL RHFKYYGEEVDPVYLAYI---  
SLVATQVTVSDRLLTD RYVNLKIFRGFTSLLWLSAQIGDKGPAATITVQTIAGLGALVLFILL-  
RVVVLVETLYFKYVVV-  
MLGYQAAKDVADADPEHFLSLAHASRDVEWIEVVPAFFYYFKTATSRMSKNTALAKEFFGLFKERLRV  
IDVLVVPDRVEALVAFVALAGTLATSAQTLPGVIACGFCAPNAAVLEADQDWNLHRSMGITLAFY  
DARES VKGWFDKGLHKDVAATGLREAGALTPFHAGDTAKQCVPAIHRVLDLGELEAALIEIDSAVVV  
ADEEQSLADKPTTRENSVGAVGGVVLGTMNMGANLDSVERGANIIIEEEEQYSAVNGKKADGKV  
TDKVMVLSAAYFAVLKRIASANALDKGA FGLLIDAPNDADNKHGRRLTIPAPTVAESAPLYAESEI  
ERIAWIAPLHLLGTLD AVLGFEPDQYSFISMMIEASLEIMETAEV--

DYHVLETGSRPPGFRILIKGLHIRLLAGVCTIIVVGSAGRTEVTAYIQG-  
AVPITLNKQTFPLPAFAASSCHVIDIFSTMLRPPERSAIEMLILETVAEL-  
LEATRIENDKLERMVALLPGLDAAALLDLVAAAKDFAAIVTIDQAITAILSVAEEAVVLREMLLTAEIAV  
TALALALALLMLTPDQGLHQKEQAREGQMKALIQGGVVLQVKATDRMMLASTADKVRLDTDEGT  
TSAFASLNLATVSDGFYVLSSAVLQMSADLMMIVAVARVLADKETKNALVVRHPEQVKTQSTYAEGS  
PGMVLQTLTGAIPPLAIKPETVELLWTLVAALWKVKAHLANAARPHIERVLILILALSITVLLQSEGGG  
MGGG--  
GPAAKALAAFSILTIIKAKAGEEVRKVARRVMDLNSRLGRPEEAVNPEFRGAELEQTKYEENVEVDTM  
ETIRRFVDIPFLVSTRTQHNESEDGRGARMVLDVTRVRFIDL-  
VTKRSEIILAAARETDGIIAREMGKDLAALHPEAAALGKIAALQHFIQVQDAHISNYVTAAIHAVLGMML  
LVLFIQEVRVSKVWPTRREVTMVFIMAALAVFFLVIGLVQVLFMLSGISWNQLTTIVLGEGIMVVRQ  
TNTFPEDS-  
IGILQNTYADLICSGRVAKADIEASLHIVVAGRVARGTWYVIYLYEISQAQDQSGIMQRAFRQMTLSQ  
SLIDGRMECKIKVVTSDRYA-  
TYEIKGGQHRKGTRYNRVKVGHNIPVQVLPRMKMAFGPPNLVLVKTFGAVVQKRFAQALTHIRHGA  
VTIGPMEVSSPYISNKKARHAPGDSVVDLKPDNIVRSVAVPELIWARENEDNGAVHDKYVKTTHKL  
QAKRKAANDVKAQYDHRNQVELSFIGLAVKVLPEKAIVHATSGALMPTASVAVTEGMKGIAATIRLDP  
MEKALIAIYIKMRPQLNLGGQTDKKIVKCLNNNLDDVEYGKLGRRKIKPITIKSVYDVEHRRATELVKL  
MPYKDDVESRKSQFAEK--  
ALFEPLSAFMMMFAGFIARAVYALYLRVIRRTILLVKTIVVNASTVLSAIIIGVSIRLRHKSTNVAETNHHI  
KTIEARARMTLAGTGKVKLNLSPGKVGKKGGRIGKGYMPYKNFNIFDGLASGRRAKVKELAKLKNVDKA  
ITVDGIRTKQQGGRTPKAQLSNAI-  
NTRVGVDIVGENEQUEESNPRANAEMGQIFAAIDARVFSHVGALIGHALEAVLAVVAIWDIGRAHNLL  
AIRLKINAGIEMHSAA-  
VEVAVAAAAFAQSAGEASVIADISESYLGALAISETSVDSRLRRRSLSELKTKKKDAYMSLTCFGGKGD  
KVKIIEATQTQAYEIVATRTAERHGIRAKGTYGKERAMMQITPTKPKIWWPVFVNETELLAPIRAFAES  
TGDGVTVVKLTDDVKTVMFEKAVASIAVTGKATSIVYTVLEKVTQLMKDIIYTQRAKAHYGRGLRSHV  
VTTTKQRRHLSMIKRTVVADPSMDAARLTDGEVAVITGATMAFVMSEQEAV--  
GDVRLHYHEEPRREAELGIGGPETFLTTEQPRVLALLFLRAYLIHIVEIGTVNGFSDAATIYDVLAMQN  
KLDRKLSADIAKVRMVLSDNVTDMGVTDVAPRREAAGDKILSAFWINGVTANADIILLVANLETHCVP  
ENIDCAIRLFYQRITLQAKERGGDVSVAIVPAANQIEAAENTVIYSIKGQTPGTGQMKLITIEGSRIVKS  
LAVQLFQVDTFLDDTWIATWLRAALQVVFVGAEDGKEAVDHVVERDTELEFAPQKDIVARKIRIYTPA  
APSAVVIWDPAPIEREDKAEAQGTILKIYGNLQDINCFTDIGAEPKIESLKAWDEKEKYVVHRDDIPEDI-  
TLVGKSSKVNKEFAIPDVAVCAPSKPGVTESIDRGEKAGTCGEVANMSYPQESLVNTVSSANVQKNI  
SMVLSGHPVGEMGISREIERHLETSMCEIFVDKDDVDVALDFYILTLPRLVGLDPPNARVQIDGKESR  
KLMAVQDGDADLQRHPKVSQATGTGLKAGVKARMPDDALIVDGVMHGDDVSFTATDLPDGRV-  
VTPVFNEVKAQLKIDKVLLKAFHVVTLSFSNDKGEEHLIKRLNALKKSTRHYEMLLKIRETECAESPHAI  
SVGKVLKIDALMQTICEAHYKEIEPLLADELTA LGVMGEQGLLHIVPRLMILAVLHLHQLEIAEQLHEW  
GLQAAAIVTDQTMGLYCRDRAWSF-AISEVVGNTEFFARTKESDTEQKIRARNPV-VLL-LGKFNMI-  
ISPSGLGLASTAESPGRGNTIELLSAERLQDEMGYYVLRILLVFVDEVILAYGSGDDPIKFLVAEQAVT  
GRQNPGMVTLTR-  
TFPLELQRNATFVMVFEDCTMKNLSHKKMHMNLVVIKSGWIVNVSTKILISDQAIASAEADAGAHT  
QPSESALAVITSRVMAPIVLVVSQKPTAPSKTLFLEALSLEYDEVATVQNKPKYYIFEGDVVAVLGGGLD  
AAVLLGMQRQPQDRMRRAIVAGAVRLAIAIRASGVVTRLEENLINFRAVNFAALFYQIGNLV-----

----EFRVRNHADVSTKRSRPYKAHPKFLHKADV DKS LIATGVDTLA  
>GCA\_002933395  
AVIKPVTMNKYAPVLMIRQQQVATVSGAGSPSLRAKTVYRKSGLQRKAETKWVSKDFYY-  
GVVKMGNLVQLVSISVDNRAVCTVAQLVDQEVVHGMVALDAVKKKIALEAIEGMTAEDPAKVVD  
Y-GEIELKKFRDADDRADMLPVMLGLTLKIKFDPHQPVVHDLAIPVVFVV-  
GIMVQKGTMEVDDCGVSTALSDVDPIVYVSPIDLA AVAGDAMAYIDQEAAVSAAKASIDL-  
LALESNVLVVGI-PLLIPV- FEADGDT-MSFANRSRTLKTIVNLAVSYPEIKRA-ID-NIAAAM-  
MDASQAAAELSEKGTAEIRIVKRMQRSAGLADDPDLVMLEDGAEGNSNWAGQIYDDPLSGSSES  
SAGNIVFAANKRQNFARSITYLRFVEISDKAAAPLMRGVKHNAKSRSRKVDDAIAVLNFPNVPEGIAI  
RAEAEKLEDMLLHDAEEGEQILLIVVRWHVTWKTAIIVGLFPVADDVVGLIAIGGIGAVGRKDGFLNR  
HHKLNGSLIEQRRIVEKLT LRLRAALKQKLGQDQIIIFVVKVAGDLVASATVQM---  
AVGAVVAIQGPTIFVRRSRQTVIGDQEATVEILQGVAEGPADAEALLRIRVDHTVVKLSVLLIPEVPVLV  
ESVTIREGVGKALQIIQLDVYLLRDMGTGEETLAKSKS-----  
-----  
VSILKNVTEPRMENLPEGICRTFVNAGPRAAVGMLFLLDDAGKIYTIDGDLRENTKSIKSLIGLVDAAK  
PKILSAGYATTRLKIRYADVHVLSADLYAYAEERRELLRMVPVYIINAAKRRQLILFALS LKGGHRRAR  
AALGVMIAAAILESQAEQGAVNHEEPAVLLDDGEIVGSEMMISRQA ALELKQTFKIDIIVIFPEFQEKM  
VVSLKFFCTDVAIFVIALICTVGCA\_LSREPSHAQEGGAGFQKRIRGHSVLFALTVTFDRRNLRSSDA-  
ALFLGLGLAPPRYGIFYTEQPKRKQMPSEADKEEVDGFDLVNAIKEDTTS-EELDMPEAMALAVE-  
DASINVNAGVLALNGDMAAVEKVD SKRKMALAVEKWTISPIPLVDIKISGAQPFRALD-  
IEQADVSASLPKKEIEELFLPGANNAELEEELDGAGASTAEVAEDKQSAILLVNPVLVVIQDSNSAALI  
ANGGLEEWGTMAYKKHYALAARMRLHMRTID----  
GVAMDPNKQKAEIKTVKLEGDTRFRQLATEGVKEQMP-  
LHALNPDAFVLIPVLVTPAVGRVAADAGVLGAEVPCDASL-  
RELQSQKGAALPISGIRVLGMRAARAMVDEDIMVAGKVAA-  
LLVILALETITALVLMNDSEATLPWRLSVAERLEADTKRSGGFASRPFKSKPSLCKTQAHAKIADPIQEIA  
AGYVATEERFVFPVEDIPIQLILASTHSRVGSAGAGTGHLHEMAKELQAKAVIMVQNQPATNTDGLL  
NYLTTQQPTDLLFEDCLDVVIDMRRMSVV-----  
VHLNTV--  
VVVEGVSPVGSYEIMAAAAHSGLVQVERLDERTGRERTLMW MYGAMEELWLMSVTYADWVIDCAI  
GAILLHVYAQKINRAFSLERLQLAGWPPEATRW WNTWQLWLNKDGFFSYEAAFRA-  
KAVLKSDLDDYDMSDVEGVGRYQSRQELRVGYRIREQVAFEQLDPRTDILLQSLTRL SVIRHALKMVA  
ILIVREIVVEFT-  
VVAQEDVAMGHVECVLADSFDFTAKNADIGPVGLRTPDPVLGDGTVLKEAVLGKIDLANTVADFRYK  
MLIDGGRELGVSWVT LKNMLYARIWLPPAE AALKNLVPICFFLGHTELNLNIFPALWAGISKARANKL  
MAGALIEKILEKVA AFADPEATTHQSKKL RHFKYYGEEVDPVYLAYIFD TTALVSTQVTVSDRLLKDRYV  
LNLKVFRGFTSLLWLSAQIGDKGPSATIITVQTIAGLGALVLFILLMRAVVLVETLYYKYVY--  
MLGYQAAKD VADADPEHFLALSHASRDVEWIEVVPAFFYYFNTAKKNLTKN TALAKEFFGLFEERLRV  
VDVLVVPDRVEALVEFVALAGTLV TSAQALVGVIACGFCEPNAGAVLEADQDWNLHRSMGITLAFY  
KAQVSVKKWFDFKGLHKDVAEIKLNEAGALTTPFHA EVTAKKCVPAVHRVLDLGEVEAALEIDS AVVV  
ADEEQTLADKPTTRENSVGAVGGIVLAGTMNMGANLDSVERGGNIIIEEDNYS AVNGKKNDGKLT  
DKVLMVLSQAYFPVLKRMASANALDRGAFGLLIDAPDDADN KDHGRTLIPAPTVHAESAPLFAESDI  
ERIAWIAPIHLLGTLDAVLGFEPDQYSFISMMIEASLDIMQTA EVLDDYHVLEKGSRPPSFRVILIKGLHIR  
LLAGVCTIIVVGSAGRAEVTAYIQD-



AVPITLNKHTFLPAFAASSCHVIDIFSTMLRPPERSTIEMLILETVael-  
LEVTRIENDKLERMNALLPGLDVAALLDLLAAAKDFADIVTIDAAIAAILSVA AEAVVREMLLT LAEIAV  
TALALAMALLMLTRDQGLHQREVAREAQKELIQGGTVLQVKASDRMMLASTADKVRLDTDEGTT  
SAFASLNLATVSDGFYVMSSSVLQMSSDLMMIVAVARVLADKETKNALVVRHPEQVKTQSTYAEGS  
PGMVLQTLTGAIPPLAIKPEDVELLWTLVAALWRVKAHLANAARPHNERVLILALSLISVLLQSEGGG  
MGGG-  
AGPAAKILAAFSILTIIKAKAGEEVRKVTRRVMDLNSRLGRPEEAVNPEFRGAELEQTKYEAESVEVDTM  
ETIRRFVDIPFLVSTRTQHNESED RGARMVLDVTRVRFDL-  
VTKRSEIILAA RVETDGIIAREMGKDLAALHPEAAALGKIAALQHFIQDAHISNYVTAEIHAVLGMLL  
LVLFFQEV RVSKVVWPTRRREVTMVFILASIAIFFLVI----  
QIVFMLS GISWNQLTTIVLGEGIMVVRQTSTFPADS-  
IGILQNTYADLICAGRVAKADIEKSLHIVVAGRVARGTWYVIYLYDISQAQGGSGIMQRAFRQMTLSK  
SLIDGRMEVKIKVVTSDRYA-  
TYEIKGGQHRKGTRYNRVKVGHNIPVQVLPRMKMAFTPPNLVLVKTFGAVVQKRFAQAL THIRHGA  
VTIGPMEVSSPYISNKKARHAPGDSVVDLKPENIVRSVAVVPELIWARENEDNGAVHDKYVKTTHKLA  
AKRKKAVDKAQYDHRNQVELSFIGLAVKVLDPKAIVHATSGELMPTASVAVTDKMKGIAATIRLDPM  
EKSLIAYIKRMRPQLNLAGQTDKKIVKCLNNNLDDVEYGKLGRRKIPITIKSVYDVEHKRATELVKLMP  
YKDDVESRKSQFAEK--  
ALFEPLKAFMMLFGFIARSVYALYLRVIRRTILLVKTIVVNAATVLSAIIIGVSIRLRHKSTNVCETNHHI  
KTIEARARMTLAGTGKVKLNLHEGKIGMKGGRIKGFMPYKNFNIFDGLASGRRRAKVAELAKLKDVDKTI  
SVDGVRVKQGGGRTPKAQLSNAI-  
NTRVGVDIVGENEQUEESNPRANAEMGQIFAKIDARVFSHVGALVGHAEAVLAVVSIWTIGRAHNLL  
AVRLKVNAGIEMHSAA-VEAAVAAA-FEQAAAGEA-  
AIADVSEGLD GALALSTMSVDVCRLRRRSLSELKTKKDAYMSLTCFGGKGDKVKIVEATQTQAYEIVA  
TRTAERHGIRAKGTYGKERAMMQITPTKPVKIWVPVFVNEDELLAPIRAFAETQGDGVTVVKLT KDVK  
VTMFEKAVASLAVSGKATSVVYTVLEKVTQLMKDIYTQRAKAHYGRGRLRSHVVTTTKQRRHLSMM  
KRTVIADPSMKAARLTDGEVTVITGATMAFVMSEQDAV--  
GDVDLHYHEEPRREAEV GIGGPETFLTTEQPRVLALIYLRAYLIHIVEIETTNGFADAATIYDVL RAMQN  
KLDRKLSADIAKTRMVLTDNVTDMGVTDVAPRRNAAGDKILSAFWINGVTANADIILLVANLECP CV  
PENIDCAIRLFYQ RITLQAKERDGDVSVAVVPAANQIEAAEGTVIYSIKGNTPGTGQM KLTIEGISRSV  
KSAFVQLFQVDTFLNDTWIATWLRAAKQVVFVASEDGKEAVDHVVERDTELEFAPQKDIVARKIRIFT  
PAAPSAVVIWDPAIDREDKAE AQGTILKIYGP NLQDINCFTDIGAEPKIESLKAWDEKEKYVVRDDIPE  
DITTLVGKSSKVNKEFGIPDVAVCAPSKPGVTESIDRGEPKAGTCGEVANMAYPQESLVNTVSSANVQ  
KNISMVLTGHPVGEMGISREIERHLETNMCEIFVDKDDVDVALDFHILALTPLRVGLDQPNARVQIDG  
KESRKLMAVQDGD AKLQRHPKVSAAATGLTQKAGTKARMPDDALILDGVMHGDVSFTATDLPEGRV  
-  
VTPVFNDVKAQLKIDKVILRGFHVVTLSFSNDKGEEHLIKRLNALKKSTRHYEMLLKIRETECAESPHAI  
SVGKVLKIDKLLQTICEAHYKAIEPLLADDLTALGVMGQQGGLLHVPRLMILAVMHMMRLELAQQIP  
DWRLQADAVLTDQTLGLSIRAREWSF-AISEVVGNTFFARTKDDDEQRIHARNPV-VLL-  
LGKFAMI-  
ISPSGLGLKSTEE SPQERGNAEELILSTERLQDEMGYYVLRILLVFVDMVILAYGSGDEPIKFLVAEQAVT  
GRQNPGMVTLTRRTFPLELQRNATFVLVLEDSTMKNLSHKKMHMNLVVIKSKGWLNVNSTKILISDQ  
AIASYAEDAGAHTQPSESALAAITSRVMAPIVLVVSQKPTAPSKTLFLEALSLYDEVTSTVLNPKPKYYIF  
EGDVVSVLGLKLNAAVILGMQRPPQDRMRRAVVAQAIRLAIAIMASGIITRLEEGIIINFSRAVNFAILIYTS

LETWTAE-----EFRVRNHDVSTKRSRPYKAHTKFLHKADVDKSLIATGVDTLA  
>GCA\_003003285  
AVIKPVTMNKYAPVLMIRQQQVATVSGAGSPTLRAKTVYRKSGLQRKAETKWVSKDFYY-  
GVVKMGNLVQLVSISVDNRAVCTVAQLVDQEVVHGMVALDAVKKKIALEEIEGMTAEDPAKVVDY  
-GEIELKKFRDADDRADMLPVMGLTLKIKFDPHQLVVHDLAIPVVFVV-  
GVMVQKGTMEVDDCGVSTALSDVDPIVYVSPIDLAAGDAMAYIDQEAATAAAKASIELD-  
LALESNVLVVGI-PLLIPV-FEADADT-MSFANRSRTLKTIVNLAVSYPEIKRA-----IAAAM-  
MDASQAAALSEKKGTAEEIRIVKRMQRSAGLADDPDLVMLEDGAEGNSNWAGQIYDDPLSGSSES  
SAGNIVFAANKRQNFARSITYLRFVEISDKAAAPLMRGVKHNAKSRSRKVDDAISSLNFPNVPEGIAI  
RAEAEKLEDMLLHDAEEGEQILLIVVRWHVTWKTAIIVGLFPTADDVVGLIAIGGIGAVGRKDGFLNRH  
HKLNGSLIEQRRIEKLTLRLRAALKQKLGQDQIIIFVVKVAGDLVAAATVQM---  
SVGAVVAIQGPTIFVRRSRQTVIGDQEATVEILQGVAEGPADAEALLRIRVDHTVVKLSVLLIPEVPVLV  
ESVTIREGVGKALQIIQLDVYLLRDMGTGEETLAKSKSREQFREVLRQVDPITGVRLAFGQLRERLVKGGT  
MKELGTLL--  
VSILKNVTEPRMENLPEGVCRTFVNAGPRAAVGMLFLLDDAGKIYIDGDLRENTKSIKSLIGLVDAAK  
PKILSAAYATTRLKIRYADVHVLIADLYAYAEERRELLRMVPVYIINAAKRRQLILFALS LKGGHRRAR  
AALGVMIAAAILESQAEQGAVNHEEPKVLLDDGEIVGSEMMISRQAAL ELKQTFKIDIIVIFPEFQEKMV  
VSLKFFCTDVAIFVIALICTVGCA\_LSREPSHAQEGGAGFQKRIRGHSVLFALSVTFDRRNLRS-D-A-  
ALFLGLGLAPPRYGVFYTEQPKRKQMPSEADKEEVDGFDLVNAIKEDATS-EELDMPEAMALAVE-  
DASINVNAGVLALNGDMAAVEKVD SKRKMALAVEKWTISPIPLVDIKISGAQPFRALG-  
IEQADVSASLPNKEI-  
FLFLPGANNAELEEELDGAGSSTAEEADKQSAILLVNPNVLVVIQDSNSAALIANGGLEEWGTMAYK  
KHYALAARMRLHMRID----GVAMDPNKQKAEIKITVKLEGDTRFRQLATEGVKEQMP-  
LHALNPDAFVLVPLVTPAVGRVAADAGVLGAEVPCDASL-  
RELQSQKGSALPISGIRVLGMRAARAMVDEDIMVAGKVAA-  
LLVILALETITAIVLMNDSEATLPWRLSVAERLEADTKRSGGFASRPFKSKPSLCKTQAHAKIADPIQEIA  
AGYVATEERFVFPVEDIPIQLILASTHSRVGTAKRAGTGHLHEMAKELQAKAVIMVQNQPATNTDGLL  
NYLTTQQPTDLLFEDCLDVVIDMRRMSVV-----  
VHLNTV--  
VVVEGVSPVGSYEIMAAAAHSGLVQVERLDERTGRERTLMWMYGAMEELWLMSVTYADWIIDCTIG  
AILLHVYAQKINRAFSLERLQLAGWPPEATRWWNTWQLWLNKDGGFFSYEAAFRA-  
KAVLKSDLDDYDMSDVEGVGRYQSRQELRVGYRIREQVAFEQLDPRTDILLQSLTRL SVIRHALKMVA  
ILIVREIVVEFT-  
VVAQEDVAMGHVECVLADSFDF TAKNADIGPVGLRTPDPVLGDGTVLKEAVLGKIDLANTVTDFRYK  
MLIDGGRELGVSWVTLQNM LYARIWLPPAEAALKNLVPICFFLGHTELNLNIFPALWAGISKARANKL  
MAGALIEKILEKVA AFADPEATTHQSKKL RHFKYYGEEVDPVYLAYIFD TTALVSTQVTVSDRLLKDRYV  
LNLKVFRGFTSLLWLSAQIGDKGPSATIITVRTIAGLGALVLFILLMRAVVLVETLYYKYVY--  
MLGYQAAKD VADADPEHFLSLSHASRDVEWIEVVP AFFYYFKTAKKNLT KNTALAKEFFGLFEERLRV  
VDVLVVPDRVEALVDFVALAGTLATSAQALVGVIACGFCEPNAAAVLEADQDWNLHRSMGITLAF  
YKAQVS VKWFDKGLHKDVAEIKLNEAGALTTPFHAGATAKKCVPVHRVLDLGEVEAALIEIDSAVV  
VADEEQLADKPTTREN SVGAVGGIVLAGTMNMGANLDSVERGGNIIIEEDNYS AVNGKKNDGKL  
TDKVL MVLSQAYFPVLKRMASANALDRGAFGLLIEAPDDADN KDHGRTL TIPAPT VHAESAPLFAES  
DIERIAWIAPIHLLGTLD AVLGFEPDQYSFISMMIEASLDIMLTA EVLDDYHVLEKGSRPAPFRVILIKGLH  
IRLLAGVCTIIVVGSAGRAEVTAYIQD-

AVPITLNKHTFLPAFAASSCHVIDIFSTMLRPPERSTIEMLILETVAEL-  
LEVTRIENDKLERMNALLPGLDVAALLDLLAAAKDFADIVTIDAAIAAILSVA AEAVVLEMLLTAEIAV  
TALALAMALLMLTRDQGLHQREVGREAQKELIQGGTVLQVKASDRMMLASTADKVRLDTDEGTT  
SAFASLNLATVSDGFYVMSSSVLQMSSDLMMIVAVARVLADKETKNALVVRHPEQVKTQSTYAEGS  
PGMVLQTLTGAIPLAIKPEDVELLWTLVAALWRVKAHLANAARPHNERVLILALSLISVLLQSEGGG  
MGGG--  
GPAAKILAAFSILTIIKAKAGEEVRKVTRRVMDLNSRLGRPEEAVNPEFRGAELEQTKYEAESVEVDTMET  
IRRFVDIPFLVSTRTQHNESEDGRARMVLDVTRVRFDL-  
VTKRSEIILAARVETDGIIAREMGKDLAALHPEAAALGKIAALQHFIQVQDAHISNYVTAEIHAVLGMFL  
LVLFFQEVRSKVWWPTRREVMTMVFILASIAIFFLVIGL--  
QIVFMLSISWNQLTTIVLGEIMVVRQTSTFPADS-  
IGILQNTYADLICAGRVAKADIEKSLHIVVAGRVARGTWYVIYLYDISQAQGGSGIMQRAFRQMTLSK  
SLIDGRMEVKIKVVTSDRYA-  
TYEIKGGQHRKGTRYNRVKVGHNIPVQVLPRIKMAFTPPNLVLVKTFGAVVQKRFAQALTHIRHGAV  
TIGPMEVSSPYISNKKARHAPGDAVVDLKPENIVRSVAVVPELIWARENEDNGAVHDKYVKTTHKLA  
AKRKKAVDKAQYDHRNQVELSFIGLAVKVLPEKA-----  
---  
RMRPQLNLAGQTDKKIVKCLNNLDDVEYGKLGRRKIKPITIKSVYDVEHKRATELVKLMPYKDDVES  
RKSQFAEK--  
ALFEPLKAFMMLFGFIARSVYALYLRVIRRTILLVKTIVVNAATVLSAIIIGVSIRLRHKSTNVCETNHHI  
KTIEKRARMTLAGTGKVKNLHEGKIGMKGGRIKGFMPYKNFNIFDGLASGRRAKVAELAKLKDVDKTI  
SVDGVRVKQQGGRTPKAQLSNAI-  
NTRVGVDIVGENEQUEESNPRANAEMGQIFAKIDARVFSHVGALVGHAEAVLAVVSIWTIGRAHNLL  
AVRLKVNAGIEMHSAA-VEVAVAAA-FAQAAGEA-  
AIADVSEGLGALALSTMSVDVCRLRRRALSE-----  
RHGIRAKGTYGKERAMMQITPTKPVKIWVPVFVNEDELLAPIRAFAETQGDGVTVVKLTKDVKVTMFE  
KAVASLAVTGKATSVVYTVLEKVTQLMKDIIYTQRAKAHYGRGLRSHVVTTKQRRHLSMMKRTVIA  
NPSMKAARLTDGEVTVITGATMAFVMSEQDAV--  
GDVDLHYHEEPRREAIEVGIGGPETFLTTEQPRVLALIYLRLAYLIHIVEIETTNGFADAATIYDVLAMQN  
KLDRKLSADIAKTRMVLTDNVTDMGVTDVAARRNAAGDKILSAFWINGVTANADIILLVANLECPV  
PENIDCAIRLFYQRITLQAKERDGDVSAIVPAANQIEAAEGTVIYTIKGNTPGTAQMKLTIEGSRSVVK  
SFAVQLFQVDTFLNDTWIATWLRAAKQVVFVASEDGKEAVDHVVERDTELEFAPQKDIVARKIRIFTP  
AAPSAVVIWDPADREDKAEAQGTILKIYGNLQDINCFTDIGAEPKIESLKAWDEKEKYVVRDDIPE  
DITTLVGKSSKNKEFGIPDVAVCAPSKPGVTESIDRGEPKAGTCGEVANMAYPQESLVNTVSSANVQ  
KNISMVLTGHPVGEMGISREIERHLETNMCEIFVDKDDVDVALDFHILALTPLRVGLDQPNARVQIDG  
KESRKLMVQDGDACLQRHPKVSAAATGTGLKAGTKARMPDDALILDGVMHGDVSFTATDLPEGRV  
-  
VTPVFNDVKAQLKIDKVILRGFHVVTLSFSNEKGEEHLIKRLNALKKSTRHYEMLLKIRETECAESPHAIS  
VGKVLKIDKLLQTICEAHYKAIPELLADDLTALGVMGQQGLLHVPRLMILAVMHMMGLELVQQIPD  
WRLQADAVLTDQTLGLSMRAREWSF-AISEVVGNTFFARTKDDDEQRIHARNPV-VLL-  
LGKFAMI-  
ISPSGLGLKSTEEESPQDRGNAEELILSTERLQDEMGYYILRILLVFVDMVILAYGSGDEPIKFLVAEQAVT  
GRQNPGMVTLTRRTFPLELQRNATFVLVLEDCTMKNLSHKKMHMNLVVIKSKGWLNVNSTKILISDQ  
AIASYAEDAGAHTQPSESALAAITSRVMAPIVLVVSQKPTAPSKTLFLEALSLYDEVTSTVLNPKPKYYIF

EGDVSVSMGTLDAAVILGMQRPQPDRMRRAVVAQAIRLAIAIMASGIITRLEEGRHINFSRSVSLATGL  
YAMIELHPLAIIT-DTVEFRVRNHDVSTKRSRPYKAHTKFLHKADVDKSLIATGVDTLA  
>GCA\_003058085  
AVIKPVTMNTYAPVLMIAQSQVATVSGAGSPTLRAKTVYAKSGLQRKAETKWVSKDFYY-  
GVVKLGNIVQLVSISVDKRAVCTVAQLVDQEVVVRGMVALDAVKKIAVEAIEGMTAEDPAKVVDYR  
AELELRKFRDADDRADMLPVLLGLTLKIKFDPHQPVVHDLPIPVVFEVV-  
GIMVQQRGQIEVDECAISTAISDVDPVIVVSPIDLAAVAGEKMAYIDQESAVAAAKAEIELEELAESSVLV  
VGI-PLLIPV-FAADGDV-MSFANRSRELKTIVNLAVSYPAIKRA-IDN--GSAM-  
MEASQAAALAEKKGTAEEIRIVKRMQRSSGLADDPDLVMLEDAAEAGNSNWAGQIYDDPLSGSSESD  
SAGNIVFAANKRQNFAARSITYLRAVEISDAADAPLMRGVKHNSKSRARKLNDAIAALNFPNVPEGIA  
IKAAAGKSTDLLHDATEAEIILMIIVRWHVTWKTAIIISLFA-  
AGNIVGLIELGGIGAVGRKEGLLNRRHHKLNGSLIEQRRVVEKLTLLRLRAALKQKLGAEQIIIFVVKVTGDL  
VAKAKIQM---  
SVGAVVAIQGETVFKRRGRQTVIADQEATVEILKGVAEGPADAQALLRIRVDHTVVKLSVLLIPE-  
PVLVEAVTIREGVGKALQIIQLDVYLLRDMGTGDETLAKSKSREQFREVLQVDDITGVRLAFGQLKERL  
VKGGSMKELGTLL--  
IAIIRGITEPRMANLPAGVCRTFIAAGPRAAVGMIFLLDDAGKIYTIDGDLRENTKSIKSMIGIVDAAKPK  
ALSAGYATDRLKVRYADVTVLTSDADLYAYAEERRELLRMVPVYITNAAKRRQLIIFALSRLGGHRRAR  
AALNVLIAAAILESQAERGQVNHAAPVVLLDDGEIVGSEMMISRQASLDLKQILKIDIIVIFPEFQEKMV  
VSLKFFCTDVAIFVIALICTVGEMLSREPSHAQEAGAGFGKRIRSHSVLFALAVTFDRKNLGD---  
DLFLNLGLAPPRYGIVYTEQPKRKQMPSEAAEEIDGFDLVNAIKEDTSSNHELDMPPEAMALAVE-  
DSTINVSAGVLAINGDMAAVEKVDSKRKMALAVEKWTISPLPISDLKISGAAKFRVLG-  
IEQANVSATMPKKTWFLYLPGANNAEMEEAKLDGAGSSTADAAEDKQLGILLVNPVLVVIQDSNT  
ASLIANGGLEEWGTMAYKKHYAFAARMRLHMRTID-----  
VMDPNKQKAEIKITVKLEGDTRFRQLATEGVKEQMP-  
LHALNPDAFVLVPILVTPAVGRVAADAEC LGARVPCDASL-  
RELQKSQKGNALPISGIRLLGMRAARAMVDEDIMVAGKVAA-  
LLVISAISTITAIVLMNDSEATLPWRLSVAERLEADTKRGGGFASRPFKSKPSLCKTQAHARIADPIQEIA  
AGYVASEERFVFPVEDIPIQLILASTHSRVGA AKRAGLGHLEMAKELQAKAVIMVLNEPGTNTTEGLLN  
YLTTQQPTDLLFEDCLDVVIDMRRMNVV-----  
VQLNTV-  
HVLVPGVSDLGEREIMAAAAHSGLVQVEQMDDRGTREKTLMYMYGAMEELWLRSLTWGDWVIDC  
TIGAILLHVYAQQINRAFSLERLQLAGWPPEATRWWTWQLWLNKDGFFGYEAAFRAMKAVLKAD  
LADYDMSDVEGVGRYQSRQEIRVGYRIRQQVAFEQLDPRTDILLQSLTRLSVIRHALTMVAILIVREVV  
VEFTLVVAQEDVAMGHVECVLADAFDFTAKDADIGPVGIRTPDPVLGDGTVLKDAVLGKIDLANTVA  
DFRYKMLIDGGRELGVSWLSLQNMPLYKRIWLPPAQAALKNLEPITFFLGHPELNLHIFPALLYAGISKAR  
ADKLMAGALIEKILEQIAAFADPEATTHQSKKLRFHKYEGEEVDPVYLAYILDMFALVATQVTVSDRLL  
KDRYVLSLKVFRGFTSLLWLSAQIGEKGAATITVMTIAGLGALVLFILL-RAVVLVETLYYKYVY--  
MLGYQAAKDVADADPEHFLSLAHASRDVEWIEIIPAFFYFKTATKNLEKNTALAREFFGLFKERL---  
EVLVPPDRVEALAQFVALAGTLLTSARA-PGIIACG-  
CEPNAAAVLEADQDWNLHRSMGITLAFYDARES VKGWFDKGLHKEVAETGLSEAGALTSPFHAGST  
AKRCVPAIHRVLDLGEVEAALIEIDSAVVVADEEQTLADKPTTRENSVGAVGGIVLAGTMNMGANLD  
AVERGGNIIIEEEHYSVNGKKADGKVTDKVLMVLSAAYFPVLRMASANALDKGTFRLLIDAPDD  
ADNQDHGGGLTIPAPSVHAETAPLYAESEIERIAWIPIHLLGTLDVAVLGFEPDQYSFISMMIDASLDIM

ETAEV--DYHVLEKGARPPGFRVILIKGLHIRLLAGICTIVIVGSAGRSEITAYIQG-  
AVPITLNKQTFPLPAFAASSCHAIIDIFSTMLRPPERSAIEMLILETVAEL-  
LEVTRIENDKLERMDALIPGLDVASLLDLVSKSSDFADIVTIDRAIAAILSVA AEAVVLRREMLLTAEIAVT  
ALALAMALLMLTRDQGLHQKETARETQLKELIQGGVVLQVKAADRMMLASTADKVRDLTDEGTT  
AFASLNLATVSDGFYVLSSAVLQLSSDLMMIVAVARVLADKETKNALVVRHPEQVKTQGTYAEGSPG  
MVLQTLTAAIPPLAIKPEDVELLWTLVAALWQVKAHLANAARPHMERVLILALSLITVLLQSEGGGIG  
GG--  
GPPAKMLAASFILTIKAKAGEEVRKVTRRVMDLNSRLGRPEEAVNPEFRGAELEQSKYEAEENVEVDTM  
ETIRRFVDIPFLVSTRTQHNESEDGRGARMVLDVTRVRFIDL-  
VTKRSEIILAAARETDGIIAREMGKDLAALHPEAAALGKIAALQHFAIQDAHISNYVTAQIHAVLGMILL  
VLFIQETRISKVVWPTRREVTMVFIMAALAVFFLVIGLAVQIIFMLSGISWNA LTTIVLGEGIMVVRQTST  
YPQDS-  
IGILQNTYADLICSGRVAKADIENSLHIVVAGRVARGTWYVIYLYEITQAQSQSGIMQRAFRQMTLSQ  
RLIDGRMEVKIKVVTSDRYA-  
TYEIKGGQHRKGTRYNRVKIAHNIPVQVLPRMKMAFGPPNLVLVKTFGAVVQKRFAQALTHIRHGAV  
TIGPMEVSSPYISNKKARHAPGDAVVDLKP DNIVRSVAVPELIWARENEDNGAVHDKYVKTT HKLA  
AKRKKAVDKAQYDHRNQVELSFIGLAVKVL PDKA-----  
---  
RMRPQLNLGGANDKKIVKCLNNNLD DVEYGKLGRRKIKPITIKSVYDVEHRRATELVKLMPYKDDVES  
RKSQFAEK--  
ALFEPLKAFMMLFGFIGRAIYALYLRVIRRTILLVKT KIVVNASTVLSAIIIGVSIRLRHKSTNVAETNHHIK  
TIEARARMTLAGTGKVKLNLSPGKIGMKGGRIKGYMPYNNFNIFDGLASGRRRAKV KELAKLKEVDKTIS  
VEGIRKQKQGGRTPKANLSNAI-  
NSRVGVDIVGENEQUEESNPRANAEMGQIFAKIDARVFHHV GALIGHALTAVLAVVAIWGIGRAHNLL  
ADKLKVNAGIEMHSAA-VEMAVAAA-FEENGGEA-IVVDISEAYLDALAITAMSVDVCRLRRRGLA--  
-----  
RHGIRAKGSYGKERAMMQITPTKPVKIWVPVFVNETELLAPIRAFAESTGDGVT VVKLT TTDVKVTMFE  
KAVASIAVTGKATSIVYTVLEKVT ELMKDIIYTQRAKAHYGRGRLRSHVVT TTKQRRHLSMIKRTVVAD  
PSMDAARLTDGEVSVITGATMAFVMSEQDAV--  
GDVDLHFHDEPQREADVGIGGPETFLTTEQPRVLALIFL RAYLIHIVEIGTVGGFSDAATIYDV LRAMQ  
NKLDRKLSADIATRMCLTDNIADMGVTEVA AKRDAAGDKILSAFWINGVTANADIILLVANLECPCV  
PENINCAIRLFYQRITLQSKERNGDVSVSIVPAANQIEAAEGTVIYSIKGKEPGTGQM KLTIEGISRSIVKS  
LAVQLFQVDTFLDDTWIATWLRAAGQVVFMHADDGKEAVDYVVERDTELEFAPQKDIVARKIRIYTP  
AAPSAVVIWDP AIEREDKAEAQGTILKIYGP NLQDINCFTDIGAEPKIESLKAWDEKEKYV VHRDDIPED  
I-  
TLVGKSSKVNKEFAIPDVAVCAPSKPGVVESIDRGE PKAGTCGEVANMAYPQESLVNAVSSANVQKN  
ISMVLAGHPVGEMGISREIERHLETNMCEIFVDKPDVD VALDFSTLTLTPLRVGLDPPNARVQIDGKES  
RKLMAVLDGEADLQRHPKVSQATGLTHNAGVKARLPDDSL LDGVMHGDISFTITDLPEGRV-  
VTPVFNAVKAQLKIDKVLLKAFHVVTLSFSNDKGQEHLIKLRLNALKKSTRHYEMLLKIRETECAESPHA  
ISVGKVLKIDALLQTICEAHYKEIEPLADDLTALGVMGQQG LLHIVPRLMILAVLHVGLAAAFQVVR  
W-LQQVAIVTTQTLGLRHRTDWSFIAISEVVGN TFFARTKDDDEQRIHARNPV-VLL-YGKFPMI-  
ISPSGLGLQSTAPSAQDRENTEELISKERLQDEMGYYVLRILLVFVDEVILAYGSGNDPIKFLVAEQAVT  
GRQNPGMVTLTRRTFLELQRNATFVMVFEDCTMKNLSHKKMHMNLVVIKSGWIVNVSTKILISD  
QAIASYAEDAGAHTQPSESALAVITSRVM APIVLVVSQKPTAPSKTLFLEALSLYDEVTATVLNKP KKKYY

IFEGDVVGKLGLIKGRLLKGVLLVMPNAPRLACVAKAVRMAIAW-----  
-----DFRVRNHADVSTKRSRPYKAHPKFLHKADIDKGLIASGVDTLA  
>GCA\_003072065  
AVIKPVVQDEYAPVLMIRQDQVATVSGAGSPSLRAKTVYAKSGLQRKTATKWVAERFYY-  
GVVKASNIVQLVSISVDNRSVCTVAQLVEQEVVVHGLVALEAVKKKIALEAIDGMTTEDPAKVAQF--  
-----IPTVFEVV-  
GIMAQKGTIEIDECGLSTALSDVDPINYPIDLAAVAGEQMSFIDQETAVANAREAIELEELALEASILV  
VGIKPLLPVP-FHEEG-T-MSFANRSRELKSIVDLAVGYPEITRARIE-DFVAEM-  
MERAKAAALAEKRGTAEEIRIVKRMQKSSGLADNPDLVMLEDAAEAGNAAWAGQIYDDPISGSSES  
VGNIVYAANKRQNFQRSITFIRRAEISDKAAAPLMRGVKHNAKSRVARKLDDAIAALNFPNVPEGIAIR  
AEAGKPEATLLHDAAEGEEILLIVRWHVTWKTAFVLLLPDAGNVVGLIDLGGIAAVGKMEGLLNHRH  
HKLNGSLIEQRPIIEKMTLRLRASLKQKLKGDQVIFVVRVAGDLVAEATVQM---  
NVGLVVAIQGETIFVRRHKQTVITDQEATV-VLQGVAEGPADAAALLRIRVDHTVVQLSVLLIPE-  
PVLVESVTIREGVGKALQIIQLDVYLLRDMGTGEQTLAKSKSREVIREILQVDPITGVRLAFGKIKEQLSK  
GMKLDLD-----  
LALLVGVTEPRMENLPQGVCRNFIAAGPRAAVGMLFLLDDAGRIYTIDGDLRELSKSIKSLIGLVDAAT  
PKILSAGYATTRLKIRYADCTVLTSDADLYAYAEERKELMRMVPVYIIKAAKRRQLVIFALS LKGGHRRTR  
AALEVLLPATILESQAEEGSVDHEDPQVLLDDAEVVGSEMMISRQSALELKRILKVDVIVVPEFQEKM  
VVSLRFFCTEVAIFVIALITTVGEMLSREPEHAQEEGAGFQKRIRGHSVLFALVVTFDRRNARCA-  
APNLFLALGLAP-  
RYGILYTNQPKKKQMPSEPDDDRIDGFELVHAIHNDGRDNHELEFGEAMALAVEADATINVSAGVLA  
MTGGMVATEKVDSKRKVALAATRWTISNASIEDLRISGADELRLCG-IEVADVSAALNEKSI-  
FLFIPGANNAELEEAKLDGAGSSTAEEAEDRQLDILIKPVLVTIQDSNTASLIANDGVEEWGTMAYKK  
HYAYAARMRLHMRTID-----ALEPNKQKAQKVKTVRLEGDTFRQLATEGVKEQMP-  
LHALNPEFAV-RPLLVTAVGQVAAEEDVLGARVPCDFSL-  
RELQKSRKGNALPISAMRLLGMRAARAMIEEGIMVAGKVAA-  
LLKIAALETIVHVLRNDSEATLPWRLSVAERLEADTKRGGGFASRPFMSKPSLCDTQAHANVADPIET  
IAAGYVAVEDRFVFPVEGIAIQLILAGPHSRVGGDKRAGEGHLHEMAKELKAKAVLMVKGEPENDTEG  
LLNYHTTNQPTDLLLTDCLDILIDMRRMTIV-----  
VQLNTV-  
HVVVAGVRPVGSYQIMAAAAHSGLIQVEQIDDLTGRERTLMWMYGAMEELWLLSLRYADWVINTPI  
GAILHVYAQAINRAFSLTRQLIEGWPEADRWWNTWQLWLNKDGFFSYEAAFRAVKAVLKAELADF  
EMSDTEGVGRYLSRQEIRAGYRIRQQVAFARLDPRTDILLQSKTRFAVIRHALNMVAILVVREVAPEFT  
-  
VVAMEDVAMGHVECVLAECFDTAKNADIGPVGLKTPDTIFGDGTVLKDAVLGKIDLKNTVQDFRYR  
FIIDGGRELGVVSLTNMLYARIWLPPAQAKLDLLPIAFFLSHPELDMDLM-  
SLWEGISKARADQLMASVLEEILENIARFADPEATIHQSNKAKHFKYYGEEVDPVHLAYILSIFALVATQ  
VTVSDRLLKDRYVLNLQIFRGFTSLLWMALQLAEKGPAATVFTLGTIAGLGALVLFILL-  
RDSVLVETLYYRYVYVMRGYTAAKDVTADPEHLLILAHATRDIEWIEIIPAFFYYFKTATSRLSKNTAI  
AKEFFGLFPDRLRIVEVLAVPPERVEALVEFVALAGTLPTAADALPGIIASGMAEPNAAAVALADQDW  
NLHREMGITLAFYKAQSSVKGYFDKGLHKAVAAVSLKEAGGFTTPFHAGATAKKCAPAVHRVIDLGEL  
EASLIEIDSAVVVADEEQSLASKPTTRENSVGAVGGVILAGTMNMGANLDSVERSGNIIIEEETYNNAV  
NGKKADGKLTDKVLMVLSAAFFVVMRRLSSANALDKGAINLLVDAPDDADNIDHGRVLVIPAPTVHS  
ETTPLYAESEIERIAWVAPLHMLGTLPVLEFEPDQYSFISMKIKASLEIMETAEVLLDDYHVLEKGSRPPD

FRIILIRGLHIRALAGIGTIIVVGSAGRTEITAYIEG-  
AVPITLNKDTFLPAFAASSCHVIDIFSTMLRPPERSTIVTMILETVAEL-  
LEVTRFANDKLERLKLPLGLDMAEILTVAQAADFQIVITDAAITAILSVAEEAVVLREMLLTAEIAVT  
ALALALALLMLTPDRGLTQREAREEQMKELIQGGVVLQVRAADRMVLAADKVRSTDEGTTSA  
FASLNLATVSDGFYVMASAVLQMSSDLMMIVSVARVLADKESKNALVVRHPEQVKTQATYAEGSPG  
MVLQTLTDHIPPLAIKPEDVELLWTLVAALWRVKAHLAQATRPHRERVLVLLLALSILVLLQSEGGGI  
GGG-  
MGAAAKILAAFSILTKASVGEEVRKVARRVMDLNSRLGRPEEAVNPEFRGAELEQTKYEAENVEVDC  
LETVRRFVDIPFLVSTRTQHNESEDRGARLVLDVTRVRFDL-  
VTKKSEIILVERAETDGVISREMSKDLQALHPEAAALGKVAALQHFVAINDGHISNYVTADIHSVLGML  
LLVLFIQQVRVGKVVWPSRREVTMVLIMTTVALFFLIIGL--  
QLVFMLOGGISWQQLTTLVLGEGVMAVRQTSTFPQDS-  
IGILQNTYADLICAGRVTKADIEASLHIVVGARVARGTWYVIYHYDITQAQQEAGIMQRAFRQKTLKS  
LIDGRMEVKIKVVTSDRYA-  
TYEIKGGQHRKGRFNRVKVGHNIPVDVLARIKMAFSPNLLVKTFGAVVQKRFAQPLTHMRWGAV  
TIGPMEVASPYIQSKKARHAPGDSVVDLKPNDILRSVAVPELIWAREKEDQGAVHDKYVKTTHTKTA  
KRNRAVDKAQYDHRNQVELSFIGLAVKVLPEKAIVEATAGQLMPTATVTVTEGLRGVAATIRLDPMEK  
TLIAYIKRMRPQLNLGGKTDKKIVKCLNNNLDDVEYGKLGRRKIKPLTIKSVYDVEHEHATELVKIMPYK  
DDVEGRKSQFAEKNEAIFEPLKAFMMLFGFIARAVYALSLRVVRRITVLVTKIVVNAATVLSAIIIGVSI  
RLRHKSTNVADTNHTIKTIEARARMTLAGAGKVKLNLRPQKVGVMKGGRIKGFMPYKNYNIFDKLSSGR  
RGKVKELAKLKKVDKEISVDGIRVKQQGGRTPKADLSNAI-  
NTRVGVDIVGEREQQASNPRANAEMGQVFAAIDARIHHHAAAMTGHALA AVLAVAAAILGIGKAHA  
LLAVKLKINAGIELHSA-VETAVAAA-YADAGGEA-AIADVSEG-  
LGLISISAESLDVCRVKRRSINELKKTKEAYMSLTCFSGKGDRVKIVEASQTQFYEIVATRTAERHGIAK  
GTYGKERAMMQITPTKPVKVWVPVFDSELLAPIRAVAETVGDGVTVVKLTKDIKVTMFEKAVASLA  
VAGKSTTVVYTVLEKVTESKDIIYEQRSAHYGRGRLRSHVVTHTKSKRHLSMMKRTVVAAPHMTAA  
RLTDGEVTVITGATMAFVMAEQDAV--  
GDVDLHYHEEPRREAGLGIAGPETFLATDQPRVLALIFLRLYLIHLVDVGTKGDFAEAAIYDILRAMQ  
NKLDRLKSADIKTRMCLHDNLADMVTELAPRRETAGDSILSAYWINGVTANADIILLVANLECACV  
PENIDCALRLFYQRITLQAKERGGDVTAVVAAQNQIEAAEGTVIYSIKGATPSTTQMKNLVEGISRSIV  
KSLAVQLFQVHHFLEDTWLGTLLRAAGDVAYVDAKGGDEAVDHVIERDTELEVGPQKDIVTRKIRIYT  
PAAPSAVVIWDPAIEREDKADAQGTIIKIYGNLQDINCFTDIGAEPKIESLKSWEDEKEYVVRDDIPE  
DI-  
TLVGKSSKVNKEFGIPDVEVCAPSKPGVTESIDRGEKAGSCGEVANMAYPQESLVNAVSSANVQKNI  
SMVLGGHPVGEMGISRGIERHLETSMCEIFVDKPDIDVALDFSTLALTPLRVGLDPPNAKVQIQGKETR  
KLMAVLGDGEADLQRHPKVSEATGIVKTAGAKARLPDDALVYDGVQNGDVSFTITDLPQGRV-  
VTPVFNTIKAQLKIDKVMLKTFHVVTLSFSNNKGDEHLIKLRLNALKKSTRHYEMLLKIRETECADSPHAI  
AVGKILKIDALLQTICVAHYTEIEPLLADDLTALGVMGQQGLLHVVPRLMILAVLHLWDIAAQMYVPK  
W-LAASAVTDITMGLDQRDRDWTY-CISEVVNNTFFARTADDDTEQRLHARNPI-VLL-  
YGKFGMT-  
ISPSGHKLESTPVTELETDNEGNVILSAVHLQDAMEYYVANLLL VFVDEMILAFSGSDVPIRFLVAEQAI  
TGRENPGMVCLTRRTFPLDLQRDATFVLVFEDSTMKNLSHKKMHMNLVLIKSKGWIVNVSTKILISDQ  
AIASYAEDAGAHTQPSESALAVITSRVMAPIVLVVSQKPTAPSKTLFLEALNLYDEVATVQNPKPKYYI  
FEGDVVTILDAIDAAVLLGMQRPQPDAMRRAIVAKAIRLAIALRASHVHTRLEHGLNFSRAVSFTQ-

AYTMLDVYAH-----EFRVRNHKVKTKRARPYKGHTKFLHKADMMDKSLVAAGVDTLA  
>GCA\_003201935  
AVIKPVTMDAYAPVLMIRQQQVATVSGAGSPTLRAKTVYAKSGLQRKSETKWVSKDFYY-  
GVVKLGNIQVLSISVDKRAVCTVAQLVDQEVVVRGMVALEAVKKKIALEAIQGMTAEDPAKVVDY-  
-----IPVFEVV-  
GIMVQRGQIEVDECAISTAVSDVDPIVYVSPIDLAAGDKMAYIDQEAANAKQEIINLEELAESS  
VLVVGI-PLIPV-FAADGDV-MSFANRSRTLKTIVNLAVSYPEIKRA-LSNA--AAM-  
MDASQAAAAAEKRGTAEEIRIVKRMQRSSGLADDPELLMLEDAAEGNSNWAGQIYDDPISGSSES  
AGNIVYAANKRQNFARSITYLRAVEISDPAAAPLMRGVKHNAKSRSRKVDDAITALNFPNVPEGIAI  
RAEAGKSRDLLLLHDATGEIEILLIIVRWVHTWKTAVIISLPLADNVVGIITMGGIGAVGRKDGLLRHH  
KLNGLIEQRRIVEKLTLLRLAALKQKLGAEQIIIFVVKVAGDLVAKAKVQM---  
SVGTVVAIQGETIFVRRHRQTVIADQEATV-ILKGVAEGPADAQALLRIRVDHTVVKLSALLIPD-  
PVLTESVSIREGVGKALQIIQLDVYLLRDMGTGEETLAKSRSEVIREVLQVDEITGVRLAFGQLKERLVK  
GGTMKELG-----  
IAILKNITEPRMANLPAGVCRTFVNAGPRAAVGMIFLLLDEAGKIYTIDGDLRENTKSIKSMIGLVDAK  
PKTLSAGYATTRLKIRYADVTLTSDADLYAYAEERKELLRMVPVYITNQAKRRQLIIFALS LKGGHRR  
RAALGVMIAAAILESQAEQGAVNHAEPVLLDDGEIVGSEIMISRQAALDLKQIIKTDIIVIFPEFQEK  
VVSLKFFCTDVAIFVIALICTVGEMLSREPSHAQEEGAGFQKRIRAHSVLFALAVTFDRRLRDT-  
TPALFLNLGLAPPRYGVFYTEQPKRKQMPSEEDKEEVDGFDLVNAIKEDGTK-EELDMPEAMALAVE-  
DATINVNAGVLAMSGDMAAVEKVDKSKRMALAVDKWTIARRDIVDLKISGAAKFRALG-  
IEQADVSATLSKKQVWFLFLPGANNAEMEEAKLDGAGSSTAEEAADKQLGILLINPVLVVIQDSNTAG  
LIANGGLDEWGT MAYKKHYALAARMRLHMRTID-----  
EMDPNKQKAEIKTVKLEGDTRFRQLATEGVKEQMP-  
LHALNPDAFVLPVLPVTPAVGRVAADAGVLGARVPCDASL-  
RELQKSMNGNALPISGIRLLGMRAARAMVDEDIMVAGKVAA-  
LLVIVAVTTITHIVLRNDSEATLPWRLSVAERIEADTKRASGFAARPFKSKPSLCKTQAHAQIADPIQ  
AGYVATEGRFVFPVEGIPIQLILASPHSRIGAAKRAGEGHLHEMAKELQAKAVIMVLNEPDTNTEGLLN  
YLTTQQPTDLLFEDCLDVVIDMRRMSVV-----  
VQLNTV-  
HVLVPGVRELADREIMAAAAHSGLVQIERVDERTGRERTLMWMYGAMEELWLMSIRYADWVVDCA  
IGAILLHVYAQQINRAFSLERLQLAGWPMEATRWNTWQLWLNKDGFFSYEAAFRVAVLKADL  
DDFDMSDVEGVGRYQSRQQLRVGYRIRQQVAFEQLDPRTDILLQSMTRLVIRHALTMVAILIVREIV  
VEFTLVVAKEDVAMGHVECVLADAFDFTAKDADIGPVGIRTPDPVLGNGTVLKEAVLGKIDLANTVA  
DFRYKMLIDGGRELGVSWVTLQNLIIARIWVPPAQAAALKNLVPIAFFLGHTELNLHIFPMLWAGISKA  
RANKLMAGALIEKILEKVAAFADPEATTHQSKIRHFKYGEVDPVYLAYILDMFALVATQVTVSDRL  
LKDRYVLNLKIFRGFTSLLWLSAQIGDKGPAATVITVQTIMGLGALVFIILL-RVVVLVETLYYKYVY-  
VMLGYQAAKDVAADADPEHFLSLAHASRDVEWIEVIPAFFYFKTATSRLSKNTALAKEFFGLFKERLRII  
DVLAVPPDRVEALVAFVALAGTLVTSQAALAGIIAYGFCEPNAAVLEADQDWNLHRSMGITLAFYD  
ARESVKGWFDKGLHKDVAATGLREAGALTPFHAGATAKQCVPAIHRVLDLGEVEAALIEIDSAVLVA  
DEEQTLADKPTTREN SVGAVGGVVLAGTMNMGANLDSVERAGNIIIEEEEQYSAVNGKKS DGKVT  
DKVVMVLSAAYFPVLKRMASANALDKGAFGLLIDAPDDADNKHGRELTIPAPTVHTESAPLYAESEI  
ERIAWIAPLHLLGTLDVAVLGFEPDQYSFISMMIDASLEIMETAEVLDYHVLETGSRPPAFRVILIKGLHI  
RLLAGVCTIIVVGSAGRTEVTAYIQG-  
AVPITLNKKTFLPAFAASSCHAIDIFSTMLRPPERSTIQMLILETVAEL-



LEVTRGENDKLERMVALLPGLDVASLLDLVAAATDFAAIVTIDQALTAILSVAAEAVVREMLLTAEIA  
VTALALALALLMLTPDQGLHQKEQAREAQMKAQGGVVLQVKAADRMMLASTADKVRLDTDEG  
TTSASFASLNLATVSDGFYVLSSAVLQMTADLMIVAVARVLADKETKNALVVRHPEQVKTQSTYAEG  
SPGMVLQTLTGAIPPLAIKPENVELLWTLVAALWKVKAHLANAARPHNERVLILALSLITVLLQSEGG  
GMGGG--  
GPAAKALAAFSILTIKAKAGDEVKVARVMMDLNSRLGRPEEAVNPEFRGAEEQSKYEAENVEVDTM  
ETIRRFVDIPFLVSIRTQHNESEDGRGARMVLDVTRVRFDL-  
VTKRSEILAARAETDGIIAREMSKDLAALHPE-  
AALGKIAALQHFIQVQDAHISNYVTAEIHAVLGMILLVLFIQEVRVGKVVWPTRRREVTMVFIMAALAIF  
LVIGLGVQIVFMLSISWNQLTTIVLGEGIMVVRQTSTFPEDS-  
IGILQNTYADLICSGRVAKADIEASLHIVVAGRVARGTWYVIYLYEISQAQDQSGIMQRAFRQMTLSQ  
SLIDGRMEVKIKVVTSDRYA-  
TYEIKGGQHRKGTRYNRVKVGHNIPVQVLPRMKMAFGPPNLVLVKTFGAVVQKRFAQALTHIRHGA  
VTIGPMEVSSPYISNKKARHAPGDSVVDLKPNDIVRSVAVPELIWARENEDNGAVHDKYVKTTHKL  
AAKRKAADVKAQYDHRNQVELSFIGLAVKVLPEKAIHATSGQLMPTASVAVTDMKMGIAATIRLDP  
MEKALIAIYIKMRPQLNLGGQTDKKIVKCLNNNLDDVEYGLGRRKIPITIKSVYDVEHRRATELVKL  
MPYKDDVESRKSQFAEK--  
ALFEPLKAFMMLFGYIARAVYALYLRVIRRTILLVKTIVVNASTVLSAIIIGVSIRLRHKSTNVAETNHHI  
KTIEARARMTLAGAGKVKNLSPGKIGKKGGRIKGYMPYKNFNIFDGLASGRRRAKVKELAKLSVDKTIS  
VDGVRQKQKQGGRTPKAQLSNAI-  
NTRVGVDIVGENEQDESNPRANAEMGQIFAKVDARVFSHVGALEAVLAVVSIWEIGRAHNLL  
AVRLKINAGIEMHSAA-  
VDTAVAAAAFAQNAAGEASVIADISESYLGALAIATSVDVCRLRRRGLSELKKTCKDAYMSLTCFGGK  
GDKVKIVEASQTQAYEIVATRTAERHGIRAKGTYGKERAMMQILPTKPKIWWPVFVTEVELLAPIRAF  
AESVGDGVTVVKLT KDVKVTMFEKAVASIAVTGKSTSVVYTVLEKVTELMKDIYTQRAKAHYGRGRLR  
SHVVTTKQSRHLSMIKRTVVADPSMDASRLTDGEVTVITGATMAFVMSEAEV--  
GDVDLHFHEEPRREAIEVGIGGPETFLTTEQPRVLALLFLRAYLIHIVEIGTVNGFSDAATIYDVLAMQN  
KLDRKLSADIAKTRMVLTDNVTDMGVTDVAPRREAAGDKILSAFWINGVTANADIILLVANLEVLCA  
ENIDCAIRLFYQRLTLQAKERGGDVSAIVPAANQIEAAENTVIYTIKGTPTGTGQMKLTIEGISRSIVKSF  
AVQLFQVDTFLDDTWIATWLRAALQVVFVGAEDGKEAVDHSVVERDTELEFAPQKDIVSRKIRIYTPAA  
PSAVVIWDPAIEREDKAEAQGTILKIYGNLQDINCFTDIGAEPKIESLKAWDEKEYVVRDDIPEDI-  
TLVGKSSKVNKEFAIPDVAVCAPSKPGVTESIDRGEPKAGTCGEVANMAYPQESLVNAVSSANVQKN  
ISMVLSGHPVGEMGISREIERHLETSMCEIFVDKDDVDVALDFYILQLTPLRVGLDPPNARVQIDGKES  
RKLMAIQDGAALQRHPKVSQATGTGLKAGVKARMPDDALMVDGVMHGDISTATDLPDGRV-  
VTPVFNNVKAQLKIDKVLLKAFHVVTLSFSNDKGEEHLIKRLNALKKSTRHYEMLLKIRETECAESPHAI  
SVGKVLKIDALMQTICQAHYKEIEPLLADELTA LGVMGEQGLLHIVPRLMILAVLQLFKLEIALQIDNW  
GLQAEALVTDQTMGLYLRDRAWSF-AISEVVGNTFFARTKETDTEQKIRARNPV-VLL-LGKFKMI-  
ISPSGLGLASTAKSPQERGNAEELILSTERLQDEMGYYVLQILLVFVDEVILAYGSGEPIKFLVAEQAVT  
GRQNPGMVTLTRRTFPLELQRNATFVMVFEDSTMKNLSHKKMHMNLVVIKSGWIVNVSTKILISDQ  
AIIASAEDAGAHTQPSALAVITSRVMAPIVLVVSQKPTAPSKTLFLEALSLEYDEVSTVQNKPKKYYIF  
EGDVAVLGTLDAAVLLGMQRPQPDRMRRAIVADAVRVAIALRASGIVTRLEEGLINFSRAVNFAALF  
YSA-----EFRVRNHVDVSTKRSRPYKAHTKFLHKADV DKG LIATGVDTLA  
>GCA\_003217255  
AVIKPVTIDTYAPVLMIRQQEVATVSGAGSPSLRAKTVYAKSGLQRKNSTKWWAKNLYY-

GVVKMSSLPQLVSISVDSRAVCTVAQVVEQEVVHGMVALEAVKKKIALEANGMTSEDPAKVVDY-  
SEVQLKRFREAEDRADLLPVMLGLTSLRFDPEHPVVDLPIPVIFEV-  
GVMAQKGTMEVDDCAVSTAISDVDPYAVSPIDLDKVSQKMDYIDQESAVAALKKELELEALEST  
VLVVGI-PLIPV-FAADGERVMSFANRSRELESIVELAVSAVQTRAR-TGAYASAM-  
MQRARAAALAEKRGTAEEIRIVKRMSRSAGLADDPPELVILEDAAEGNAQWAGQIYDDALSGSSES  
QGNIVHAANKRQNETRSITYLRKVEISDQATAPMMRGVKHNAKSRTHRKLSDSIAELNFANVPEGIAI  
AAAGALREALLLHEAGEGEEILLVVRWRTWKTAIIILVETPGDIVGLIELGGIAAVGHPEGLLRHHK  
LNGSLIEQKRVEKLTLRRLAALKQKLGAEVILVVKVAGDLVADATVQMG--  
DIGAVVAIQGEVIYVRRHKQTLITDREATVEVLRGVAQGPVDSQALLRIRVEHTLVEISVLLIPE-  
PVLVESVAIREGVGKALQIIQLDVYLLRDMGTGEETLAKSKSRELIRDVLMVDPITGVRLAFGKLT  
RQA KNTTELKQLRTLL--  
LSILAGVTEPRMEDLPDGVCRTLQQAGCRAAVGMLFLLLDAGRLYAIDGELREIPKTVKSLIGLLDAAK  
PKVLSASYATTRLRVRFADAADVLEAEANLYAYREERKQLMRMVPVYITVAAKRRQLVVLALS  
LRGGHR RALAAIGVLIAAAIIESQAVNGAIHHDEPRILLDDAEVIGTEMMITRQAAMD  
LKALLKVDVVVLFPEFQE KMVVS  
LKFFCTDVAIFVIALITTVGQMLSRSPAHAQESGAGFGKRIRGHSM  
LFALAAVFD  
RRNTGVDR LPELFLGLGLALPRYGLVYTQQPKKRQMPSEPDSEKTDGFDLVH  
AVKADGRS- HELDMPEAMALAVEANAPINLVGGVLGYSGGMSAIARVDSKRKTALAVT-----  
-----  
LFLPGANNAEEEEKLDGAGASTADVIADRQSPILLIPVLVVIQDSGSAGLVANGGVEEWGT  
MAYKK HYAYAARMRLHMRTIDVIEVGVALEPNKQKSEKIKTVKLEGDTRFRQLAVEGVKEQMP-  
IHALNPDAVLGPVLVTPAVGRVAAATEVLGARVPCDASL-  
RELQKSQKGDALPISGVRLGMRAARAMIEEDIMVAGKIAA-  
LLKIGALTILSLVLRNDSEATLPWRLSVAERIEADARRGGGFAARPF  
RSKPSLCVTQAHARTADPIQEIA ASYVASEERFVFPVEGLAIQILSSPHGRVDSAKRAGEGHL  
HEMAKELQAKAVLMVSNAPDTSTEGLV KYLTTGQPTDVL  
FEDCLDIIDLRRMSVV-----  
VHLNTV-  
HVVKGVDRDVGDFEIMNAAADSGLVQVEQVDERTGRERTLMW  
MYGAMEDLWLMSVTWADWVV DVPIGAIVLHVYAQTLNRAFS  
LRLQLNGWPPEAARWWNTWQLWLNKDGFFGYEAA  
FRAAKQVLK ADLYDYQLRDVVGVRHLSRQELRVGYRIRDQVEFAQLD  
PRTDILLQSKTRLSCIRHALALVAILRLSL VAEFT-  
VVAMEDVAMGHVECVLADRFDFTAKNAHIGPVGLKGPAPVLGDGTVFQDAVLGKIDFAKTVAE  
FRY LTLTDGGRELGVRWIGL-  
NMLVERIWLPPAQAALKDLEPILFFLGHP  
ELNLDWLDALFAGISKSRAQRLMAGTLVEQILDRVVAFAE  
PEATTHQSRKTRHFKYYGEEVDPVYLAYILEIFALVATQVTISDRLLRDRYALNMRVFRGFTS  
LLLLGLQL GDNGPSATVISVDTVAGLGALVLFILL-RDAVLVETLYFRYVY--  
QRGYTAAKDVADADPEHFLALAEVTRDVEWVEIAPAFFYFRTAT-  
FEPFNTAIAREYFGLFEERLRIIDVLVPPDRVEAISEFVAVAGTLPTAATLAPGVIACG-  
CTPNAAGVLEAEQDWNLHRTLGITLAFFKAQESVKGWFDKGLHKGVAATGLEEAGAMTTPFAAQA  
QAGRCAPVLHRVLDLGELEAALIEVDSAVMVASEEQTLADKPTTREKSVKAVGGVVL  
AGTMRMGAS LDSVERGNIIIEEEEQYHAVNGKKADGKMTDKILMVL  
SQAFFPVLRAPASANAMDKGAVDLLVEA PDDADNLDHGRELTIP  
APTVAETAPLYAESEIDRIAWIAPLHLLGTLGAVLGFE  
PDQYSFISMMIDASL EITETAECDDYHVLEKGS  
RPSEFRILIRGLQVKALAAIATIIVVG  
SAGREEATAYIQG- AVPITLKRQTF  
LPAFAPSSCHKIDIFSTMLRPPERSTVMM  
LILETVAEL- LEVTRGENSKLERLALLPGLDVA  
ALLGLVAAAEDFSRIVTIAASVTAILSVAAEAV  
VLRRELLTLAEIAVT

ALALGLALLMLTPDQGQIPRETAREAQASDLIQGGAVLQANAQDRMVLASTADKVRLSTDEGTTSA  
FASLNLATVSDGFYVLSSAVLQLSSDLMMVVKVARVLADKEHKNALVVRHPEQVKTQPTYAEGSPG  
MVLQTLTGHPPLAVKPEAVELLWTLVAALWRVKAHFAEAMRPRLERVLVLVALLSLIAVLLQSEGGG  
--FG-  
MGGAAGLAAFSIMTIKAKVGDEVKVRTRVMDLTSRLGRPEETVNPEFRGAELEQSKYEAEAVEVDT  
VETIRRFVDIPFLVSTRTQHNESEDRGARMVLDVTRTRFIDL-  
VTKRSEIILAARAETDGIISREMSKDLQALQPEAAALGKVAALQHFISLGDHISNYVTAAIHSVLGMLL  
LVLFIQQTRIAKVVWPTREVTMVFLATIAIFFLVIGLAVQIVFMLGGISYQAITTLVLGEGVLAVRQTST  
FPADS-  
VGILQNTYADLICAGRVAKADIENSLHIVVGARVSRGTWYVIYLYEITQSQGEAGILQRAFRQATLSHS  
LIDGRMEVKIKVVTSDRYA-  
TYEIKGGQHRKGTFRFLSVKVGHNIPVDVLARIKMAFSPANLILVKTFGAVVQKRFAQPLTHVRHGAVTI  
GPMEVASPYIRSKKARHAPGDAVVDIKPDNIVRSVAVVPELIWARENEDNGAVHNDRYTTPTHKLQAA  
RRKAVDKAQYDKRNQVDMISFIGLAVKVLPEKAMVHATGGTLLPTERVAVTEGIRGVAATIQLDPMK  
ALIAYIKMRPQLNLAGTNDKKIVKCLNNNLDDVEWVKLGRRRIKPIKSIYDVEPRRSTELVKLMPYK  
DDVEQRKSQFAEK--  
AIFEPLKAFMMLFGFIARAVYALSLRVVRRITILLVKTRIVVNADTVLSAIIIGVSIRLRHKSTNVADTRHHI  
KTIEKRARMTLAGTGKVKLNLRPGAVGKKGGRIGYMPYKNFNIFDGLDSGRRRAVKELAKLKKVDKEI  
QVEGIRMKQQGGRQSKADLSNAIANTRVDVDIVGENEQUEESNPRANAEMGQVFAAIDARVYHLVG  
ALIGHALEAILAVVAIYGIGRAHALLADKAKVNAGIELHSAA-VERAVAAA-  
YSRTAGDAALIADVSEAYLGALSITEASMDVCRLRRRGLRELKTKRDAYMSLTCFGGKGERVKIIEASQ  
TQAYEIVATRTAERHGIHAKGTYGKERALMQIVPSKPVKVVVPIFVSEEELLAPIRAVAETNGDGVTVV  
KLTTDVKITMFEKAIASLAVTGKSTSVVYTVLEKVTLSKDIIYEQRAKAHYGRGRLRSHVVTTKSKRHL  
SMIRRTVVAHPRMEAQRITDGETSVITGATMAFVMSEQDAV--  
GDADLHFHEEPRREAALGIAGPQTFLATAQPRLIALLILRAYLIHIVEIESVGGFADAATIYDILRPLQNK  
DRKLSADIAKVRMCLHDNLADMGVIDEAARRDDAGDPILSPYWINGVPATADIIMLVANMEAPCVP  
ENIDCAIRLFYQRTILQARERGGDVTAVAVIKAAQIEAAEGTVIYTIKGEAPGTLQMKLTVEGVSRSIVKS  
LAVQLFQVTTFLNDTWIATLLRAATEVVFVDAKDGEAVDHVVERDTELEMAPQRDVLARKIRIYTPA  
APSAVVIWDPAIEREDRADAQGTILKIYGNLQDISCFTDIGAEPKIESLKSWEKEKYVVHRDEIPEDI-  
TMVGKSSRVNKEFGIPDVAVCAPSKPGVTESIDRGEPKAGSCGEVANLAYPQSSLVNGVSSANVQKN  
ISMVLTGHPVGEMGISREVERHLETSMCEIFVDKADVDVALDFYRLALTALRVGLDPPNARVSIDGRES  
RKLMAILDGDALQHRPKVSEALGITRAGTKARLPDDSLIFDGVHHGDISFTATDLPEGRV-  
VTPVTLKVKQQLKIDKVMVKTFFHVVTLSFSNNKAEHHLIKLRLNALKKSTRHYEMMLKIRETECAESPH  
AIPVGKILKIDALLQTICVAHYTEIPELLSDELTALGVMGQQGLLHVPRMLILAVLLLV-  
LEARQLVPRW-LMRRRAVTDQTMGLAQDRDRDWF-AISEVVGNTFFARTADDDTADRLHARNPI-  
VLL-YGKFGMT-  
ISPSGLRLDSTAPDDMAEGNQTQVILSAERLHDAMEYYVVSLLLVFVDEVILAYGSGDRPIRFLVADQA  
VTGRANPGMVTLTRTFPLDCQRDAVFVLVFEDSTMKNLSHKKMHMNLVLIKSGWVVNVSTKILIS  
DQAIASAYEDAGAHTQPSESALAAITSRVIAPIVLVVKQKPTAPSKTCFLEALALYDDITATIRDRPKRYFI  
FEGDVISVLGGLDAAVLLGMQRPQPDMMRRRAVIARAVRLAIALR-----  
EAGLINFRAVTFARVWGALDA-----  
EFRVRAHSVSTKRSKPYKEHPKFLHKAEEKSLVAAGVDTVA  
>GCA\_003318235  
AVIKPVTMNTYAPVLMIAQSQVATVSGAGSPSLRAKTVYAKSGLQRKAETKWVSKDFYY-

GVVKMGNLVQLVSISVDNRAVCTVAQLVDQEVVHGMVALEAVKKKIALEAIEGMTAEDPAKVVDY  
-GEIELRKFRDADDRADMLPVMLGLTLKIKFDPHQPLVHDLAIPVVFVV-  
GIMVQKGTMEVDDCGVSTALSDVDPIVYVSPIDLAAVSGDAMAYIDQEGAVAAAKASIDLD-  
LALESNVLVVGI-PLLIPVSFEADGDT-MSFANRSRTLKTIVNLAVSYPAIKRA-----IAAAM-  
MDASQAAAALSEKKGTAEEIRIVKRMQRSAGLADDPDLVMLEDAAEGNSNWAGQIYDDPLSGSSES  
SAGNIVFAANKRQNFARSITYLRFVEISDKAAAPLMRGVKHNAKSRAARKLGDAIAVLNFANVPEGIAI  
RAEAGKSQDLLLLHDATEREEILLIVVRWHVTWKTAIIVALFPTAGDVVGLIDVGGIGAVGRKEGLLRH  
HKLNGSLIEQRRITEKLTLLRLAALKQKLGKDQIIIFVVKVAGDLVATATVQM---  
AVGAVVAIQGPTIFVRRSRQTVIGDQEATVEILQGVAEGPADAEALLRIRVDHTVVKLSVLLIPQVPVLV  
ESVTIREGVGKALQIIQLDVYLLRDMGTGEETLAKSKS-----

ISILKHVTEPRMENLPAGVCRTFVNAGPRAAVGMLFLLDDAGKIYTIDGDLRENTKSIKSLIGLVDAAK  
PKILSAGYATRRLKIRYADVHVLISDAELYAYAEERGELLRMVPVYIINAAKRRQLILFALSILKGGHRRAR  
AALGVMIAAAILESQAEQGAVNHEEPEVLLDDAEVVGSEMMISRQAAELKHVFKLDIIVFPDFQEK  
MVVSLKFFCTDVAIFVIALICTVGQMLSREPSHAQEGGAGFQK----HSVLFALSVTFERRNLRDA--  
ARLFLALGLAPPRYGVFYTEQPKRKQMPSEADSEKVDGFDLVNAIKEDATSNHELDMPPEAMALAVE-  
DATINVNAGVLALNGDMAAVEKVDSEKRMALAVEKWTISPVSLVDIKISGAQPFRALD-  
IEQADVSASLPKKEV--

LFLPGANNAEEEEKLDGAGASTADVAEDKQSAILLVNPVLVVIQDSNSAALIANDGLEEWGTMAYK  
KHYAFAARMRLHMRID---GVAMDPNKQKAEEKIKTVKLDGDTRFRQLATDGVKEQMP-  
LHALNPDAFVLIPVLVTPAVGRVAADAGVLGADVPCDASL-  
RELQKSQKGSALPISGIRVLGMRAARAMVDEDIMVAGKVAA-  
LLVILALETITAIVLMNDSEATLPWRLSVAERLEADTQRSAGYASRPFNSKPSLCKTQAHAKIADPIQEIA  
AGYVATEQRFVFPVEDIPIQLILASTHSRVGAACKRAGTGHLHEMAKELQAKAVIMVQNEPATNTDGLL  
NYLTTQQPTDLLFEDCLDVVIDMRRMSVV-----  
VHLNTV--

VVVEGVTPVGSYEIMAAAAHSGLVQVEQMDERTGRERTLMWMYGAMEELWLLSVTYADWWINCTI  
GAILLHVYAQQINRAFSLERLQLAGWPPEATRWWNTWQLWLNKDGFFSYDAAFRA-  
KAVLKADLDDYDMSDVEGVGRYQSRQEIRVGYRIREQVAFAQLDPRTDILLQSMTRLVIRHALKMOV  
AILIVREIVVEFTMVVAQEDVAMGHVECVLADSFDTAKNADIGPVGLRTPDPVLGDGTVLKEAVLGKI  
DLANTVADFRYKMLLDGGRELGISWVTLQNMARIWVPPAQADLKDLQPICFFLQHPAIDLLGTDW  
FYEGISKARANKLMAGALIEKILEKVAAFADPEATTHQSKKLRFKYYGEEVDPVYLAYILNMFALVATQ  
VTVSDRLLKDCYVNLKVFRGFTSLLWLSAQIGDKGPCATIITVQTVAGLGALVLFILLMRAVVLVETLY  
YKYVYVVMGLGYQAAKDVAADADPEHFLSLAHASRDVEWIEVIPAFFYFKTAKKNLTKNALAKEFFGL  
FEERLKIIDLAVPPDRVEALVEFVALAGTLTSSAAALIGIIACGFCEPNAGAVLEADQDWNLHRSMGIT  
LAFYKAQVSVKWFDKGLHKDVAAIKLNEAGALTTPFHAGRTAKQCVPAIHRVLDLGEVEAALIEIDS  
AVVVADEEQTLADKPTTRENNGAVGGVVLGTMNMGANLDSVERGGNIIIEEENYNVANGKK  
NDGKMTDKVLMVLSRAYFPVLKRMASANALDRGAFGLLIDAPDDADNQDHGRSLTIPAPTIHAESA  
PLFAESDIERIAWIPIHLLGTLDAVLGFEPDQYSFISMMIEASLDIMQTAEVLLDDYHVLEKGSRRPPGFR  
VILIKGLHIRLLAGICTIIVVGSAGRSEITAYIQG-  
AVPITLNKHTFLPAFAASSCHVIDILSTMLRPPERSTIVMLILETVAEL-  
LEVTRIENDKLERMDALLPGLDVAVLLGLLATAADFAEIVTIDAAITAILSVAEEAVVLREMLLTMAEIAV  
TALALAMALLMLTRDQGLHQRETAREAQMKALIQQGTVLQVKATDRMMLASTADKVRLATDEGT  
TSAFASLNLATVSDGFYVMSSAVLQMSSDLMMIVAVARVLADKETKNALVVRHPEQVKTQSTYAEG

SPGMVLQTLTAAIPPLAIKPEDVELLWTLVAALWRVKAHLANAARPHAERVLILILALSITVLLQSEGG  
GMGGG--GPAAKILAAFSILT--  
KAGEEVRKVTRRVMDLNSRLGRPEEAVNPEFRGAEEQTKYEAESVEVDTMETIRRFVDIPFLVSTRQ  
HNESEDRGARMVLDVTRVRFDL-  
VTKRSEIILAARAETDGIIAREMGKDLAALHPEAAALGKIAALQHFIAIQDAHISNYVTAEIHAVLGMLLL  
VLFFQEVRIKVVWPTRREVTMVFILAAALIFFLVIGL--  
QIVFMLSISWNQLTTIVLGEGIMIVRQTSTFPADS-  
IGILQNTYADLICAGRVAKADIEKSLHIVVAGRVARGTWYVIYLYDISQAQGQSGIMQRAFRQMTLSK  
SLIDGRMEVKIKVVTSDRYA-  
TYEIKGGQHRKGTRYNRVKVGHNIPVQVLPRMKMAFTPPNLVLVKTFGAVVQKRFAQALTHMRHG  
AVTIGPMEVSSPYISNKKARHAPGDSVVDLKPENIVRSVAVPELIWARENEDNGAVHDKYVKTTHKL  
AAKRKKAVDKAQYDHRNQVELSFIGLAVKVLDPKAIVHATAGQLMPTASVAVTEKMKGIAATIRLDP  
MEKSLIAYIKRMRPQLNLGGQTDKKIVKCLNNNLDDVEYGKLGRRKIPITIKSVYDVEHKRATELVKL  
MPYKDDVESRKSQFAEK--  
ALFEPLKAFMMLFGFIARSVYALYLRVIRRTILLVKTIVVNAATVLSAIIIGVSIRLRHKSTNVAETNHHI  
KTIEARARMTLAGTGKVKLNLHEGKIGMKGGRIKGFMPYKNFNIFDGLASGRRAKVAELAKLKDVDKTI  
SVDGVRVKQQGGRTPKAQLSNAI-  
NTRVGVDIVGEDEQEASNPRANAEMGQIFAKIDARVFSHVGALIGHALEA-  
LAVVAIWAIGRAHNLLAVRLKINSGIEMHSAA-VSAAVAAA-FAQAAGEA-  
AIADVSEGLDGLALTATSVDVCRLRRRSLSELKTKKEAYMSLTCFGGKGDVKVIVEATQTQSYEIVAT  
RTAERHGIRAKGTYGKERAMMQITPTKPKVIWVPVFVDEVELLAPIRAFAETQGDGVTVVKLTDDVKV  
TMFEKAVASLAVTGKATSIVYTVLEKVTQLMKDIYTQRAKAHYGRGRLRSHVVTTKQRRHLSMMKR  
TVIADPSMKAARLTDGEVTVITGATMAFVMSEQDAV--  
GDVDMHFHEEPSREAIEVGIGGPETFLTDDQPRVLALLYLRAYLIHIVEIETTGGFADAATIYDVLAMQ  
NKLDRKLSADIAKTRMCLTDNITDMGVTDVAARRNAAGDKILSAFWINGVTANADIILLVANLEPCPV  
PENIDCAIRLFYQRITLQAKERSGDVSVAVVPAANQIEAAEGTVIYSIKGQTPGTGQMKLTIEGISRSVV  
KSLAVQLFQVDTFLNDTWIATWLRAAKDVVFAVEDGKEAVDHHVVERDTELEFAPQKDIVARKIRIYT  
PAAPSAVVIWDPAIDREDKAEAQGTILKIYGNLQDINCFTDIGAEPKIESLKAWDEKEYVVRDDIPE  
DIDTLVGKSSKVNKEFGIPDVAVCAPSKPGVTESIDRGEPKAGTCGEVANMAYPQESLVNAVSSANV  
QKNISMVLSGHPVGEMGISREIERHLETNMCEIFVNKEDVDVALDFHILALTPLRVGLDQPNARVQID  
GKESRKLMAIQDGAALQRHPKISAATGLTQ-AGTKARLPDDALILDGVMHGDLSFTATDLPEGRV-  
VTPVFNEVKAQLEIDKVILRGFHVVTLSFSNEKGEEHLIKRLNALKKSTRHYEMLLKIRETECAESPHAIS  
VGKVLKIDKLLQTICKAHYKAIEPLLADDLTALGVMGQQGLLHVPRMLAVMHMARLEIALQIAGW  
RLQAQAVLTDQTMGLSIRARDWSY-AISEVVGNTFFARTKEDDTEQRIHARNPV-VLL-LGKFVMI-  
VSPSGLTLASTEPPQDRGNAEELILSTERLQDEMGYYVLQILLVFVDMVILAYGSGDDPIKFLVAEQA  
VTGKQNPGMVTLTR-  
TFPLELQRNATFVLVLEDCTMKNLSHKMHMNLIIKSKGWVVNVSTKILISDQAIASIAEDAGAHTQ  
PSESALAAITSRVMAPIVLVVSQKPTAPSKTLFLEALSLYDEVTATVLNPKPKYYIFEGDVAVLGLTDAA  
VLLGMQRPQPDRMRRAVVAEAIRLAIAIMASGVVTRLEEGLINFARSVSLAVGVYPTLDMLPAAIIA-  
TALEFRVRNHDVSTKRSRPYKAHTKFLHKADVDSLIIASGVDTLA  
>GCA\_003337495  
AVIKPVTMNTYAPVLMIAQSQVATVSGAGSPTLRAKTVYAKSGLQRKAETKWVSKDFYY-  
GVVKLGNIVQLVSISVDKRAVCTVAQLVDQEVVVRGMVALDAVKKKIAVEAIEGMTAEDPAKVVDYR  
AELELRKFRDADDRADMPLPVLLGLTLKIKFDPHPVVDLPIPVVFEVV-

GIMVQRGQIEVDECAISTAISDVDPVIVVSPIDLA AVAGEKMAYIDQESAVAAAKAEIELEELAESSVLV  
VGI-PLLIPV-FAADGDV-MSFANRSRELKTIVNLAVSYPAIKRA-IDN--GSAM-  
MEASQAAALAEKKGTAEEIRIVKRMQRSSGLADDPDLVMLEDA AEGNSNWAGQIYDDPLSGSSESD  
SAGNIVFAANKRQNFARSITYLRAVEISDAADAPLMRGVKHNSKSRAARKLND AIAALNFPNVPEGIA  
IKAAAGKSTDLLLHDATEAEEILMIIVRWHVTWKT AIIISLFA-  
AGNIVGLIELGGIGAVGRKEGLLNRHHKLNGLSIEQRRVVEKLT LRLRAALKQKLGAEQIIIFVVKVTGDL  
VAKAKIQM---  
SVGAVVAIQGETVFKRRGRQTVIADQEATVEILKGVAEGPADAQALLRIRVDHTVVKLSVLLIPE-  
PVLVEAVTIREGVGKALQIIQLDVYLLRDMGTGDETLAKSKSREQFREVLQVDDITGVRLAFGQLKERL  
VKGGS MKELGTLL--  
IAIIRGITEPRMANLPAGVCRTFIAAGPRAAVGMIFLLDDAGKIYTIDGDLRENTKSIKSMIGIVDAAKPK  
ALSAGYATDRLKVR YADVTVLTS DADLYAYA EERRELLRMVPVYITNAAKRRQLIIFALS LRGGHRRAR  
AALNVLIAA AILESQAERGQVNHAAPVVLDDGEIVGSEMMISRQASLDLQILKIDIIVIFPEFQEKMV  
VSLKFFCTDVAIFVIALICTVGEMLSREPSHAQEAGAGFGKRIRSHSVLFALAVTFDRKNLGDA---  
DLFLNLGLAPPRYGIVYTEQPKRKQMPSEAAAAEEIDGFDLVNAIKEDTSSNHELDMP EAMALAVE-  
DSTINVSAGVLAINGDMAAVEKVDSKRKMALAVEKWTISPLPISDLKISGA AKFRVLG-  
IEQANVSATMPKKT VWFLYLPGANNAEMEEAKLDGAGSSTADAAEDKQLGILLVNPVLVVIQDSNT  
ASLIANGGLEEWGT MAYKKHYAFAARMRLHMRTID-----  
VMDPNKQKA EIKTVKLEGDTRFRQLATEGVKEQMP-  
LHALNPDFAVLPILVTPAVGRVAADA ECLGARVPCDASL-  
RELQKSQKGNALPISGIRLLGMRAARAMVDEDIMVAGKVAA-  
LLVISAISTITAIVLMNDSEATLPWRLSVAERLEADTKRGGGFASRPFKSKPSLCKTQAHARIADPIQEIA  
AGYVASEERFVFPVEDIPIQLILASTHSRVGA AKRAGLGHLEMAKELQAKAVIMVLNEPGTNT EGLLN  
YLTTQQPTDLLFEDCLDVVIDMRRMNVV-----  
VQLNTV-  
HVLVPGVSDLGEREIMAAAAHSGLVQVEQMDDRTGREKTLMYMYGAMEELWLRSLTWGDWVIDC  
TIGAILLHVYAQQINRAFSLERLQLAGWPPEATRWWNTWQLWLNKDGFFGYEAAFRAMKAVLKAD  
LADYDMSDVEGVGRYQSRQEIRVGYRIRQQVAFEQLDPRTDILLQSLTRLSVIRHALTMVAILIVREVV  
VEFTLVVAQEDVAMGHVECVLADAFDFTAKDADIGPVGIRTPDPVLGDGTVLKDAVLGKIDLANTVA  
DFRYKMLIDGGRELGVSWLSLQNM LYKRIWLPPAQAALKNLEPITFFLGHP ELNLHIFPALYAGISKAR  
ADKLMAGALIEKILEQIAAFADPEATTHQSKKL RHFKYYGEEVDPVYLAYILDMFALVATQVTVSDRLL  
KDRYVLSLKVFRGFTSLLWLSAQIGEKGAATITVMTIAGLGALVLFILL-RAVVLVETLYYKYVY--  
MLGYQA AKDVADADPEHFLSLAHASRDVEWIEIIPAFFYYFTATKNLEKNTALAREFFGLFKERL---  
EVLVPPDRVEALAQFVALAGTLLTSARA-PGIIACG-  
CEPNAAAVLEADQDWNLHRSMGITLAFYDARES VKGWFDKGLHKEVAETGLSEAGALTSPFHAGST  
AKRCVPAIHRVLDLGEVEAALIEIDSAVVVADEEQTLADKPTTRENSVGAVGGIVLAGTMNMGANLD  
AVERGGNIIIEEEEHYS AVNGKKADGKVTDKVL MVLSAAYFPVLRRMASANALDKGTFRLLIDAPDD  
ADNQDHGGGLTIPAPSVHAETAPLYAESEIERIAWAPIHLLGTLD AVLGFEPDQYSFISMMIDASLDIM  
ETAEV--DYHVLEK GARPPGFRVILIKGLHIRLLAGICTIVIVGSAGRSEITAYIQG-  
AVPITLNKQTFLP AFAASSCH AIDIFSTMLRPPERSAIEMI LILETV AEL-  
LEVTRIENDKLERMDALIPGLDVASLLDLVSKSSDFADIVTIDRAIAAILSVA AEAVVLR EMLLT LAEIAVT  
ALALAMALLMLTRDQGLHQKETARETQLKELIQGGVVLQVKAADRMMLASTADKVRLDTDEGTTS  
AFASLNLATVSDGFYVLSSAVLQLSSDLMMIVAVARVLADKETKNALVVRHPEQVKTQGTYAEGSPG  
MVLQTLTAAIPPLAIKPEDVELLWTLVAALWQVKAHLANAARPHMERVLILALSLITVLLQSEGGGIG

GG--  
GPPAKMLAAFSILTIKAKAGEEVRKVTRRVMDLNSRLGRPEEAVNPEFRGAELEQSKYEAENVEVDTM  
ETIRRFVDIPFLVSTRTQHNESEDGRGARMVLDVTRVRFDL-  
VTKRSEIILAAARAETDGIIAREMGKDLAALHPEAAALGKIAALQHFAIQDAHISNYVTAQIHAVLGMILL  
VLFIQETRISKVVWPTRRREVTMVFIMAALAVFFLVIGLAVQIIFMLSGISWNALTTIVLGEIMVVRQTST  
YPQDS-  
IGILQNTYADLICSGRVAKADIENSLHIVVAGRVARGTWYVIYLYEITQAQSQSGIMQRAFRQMTLSQ  
RLIDGRMEVKIKVVTSDRYA-  
TYEIKGGQHRKGTRYNRVKIAHNIPVQVLPRMKMAFGPPNLVLVKTFGAVVQKRFAQALTHIRHGAV  
TIGPMEVSSPYISNKKARHAPGDAVVDLKPNDIVRSVAVVPELIWARENEDNGAVHDKYVKTTHKLA  
AKRKKAVDKAQYDHRNQVELSFIGLAVKVLDPKA-----  
---  
RMRPQLNLGGANDKKIVKCLNNNLDDEYGKLGRRKIKPITIKSVYDVEHRRATELVKLMPYKDDVES  
RKSQFAEK--  
ALFEPLKAFMMLFGFIGRAIYALYLRVIRRTILLVKTIVVNASTVLSAIIIGVSIRLRHKSTNVAETNHHIK  
TIEARARMTLAGTGKVKLNLSPGKIGMKGGRIKGYMPYNNFNIFDGLASGRRAKVKELAKLKEVDKTIS  
VEGIRKQKQGGRTPKANLSNAI-  
NSRVGVDIVGENEQEESNPRANAEMGQIFAKIDARVFHHVVGALIGHALTAVLAVVAIWGIGRAHNLL  
ADKLKVNAGIEMHSAA-VEMAVAAA-FEENGGEA-IVVDISEAYLDALAITAMSVDVCRLRRRGLA--  
-----  
RHGIRAKGSYGKERAMMQITPTKPVKIWVPVFVNETELLAPIRAFAESTGDGVTVVKLTDDVKVTMFE  
KAVASIAVTGKATSIVYTVLEKVTLMKDIIYTQRAKAHYGRGRLRSHVVTTKQRRHLSMIKRTVVAD  
PSMDAARLTDGEVSVITGATMAFVMSEQDAV--  
GDVDLHFHDEPQREADVGIGGPETFLTTEQPRVLALIFLRLAYLIHIVEIGTVGGFSDAATYDVLAMQ  
NKLDRKLSADIAKTRMCLTDNIADMGVTEVAAKRDAAGDKILSAFWINGVTANADIILLVANLECPVCV  
PENINCAIRLFYQRITLQSKERNQDVSVSIVPAANQIEAAEGTVIYSIKGKEPGTGQMKLTIEGISRSIVKS  
LAVQLFQVDTFLDDTWIATWLRAAGQVVMFHADDGKEAVDYVVERDTELEFAPQKDIVARKIRIYTP  
AAPSAVVIWDPAIEREDKAEAQGTILKIYGPNLQDINCFTDIGAEPKIESLKAWDEKEYVVRDDIPED  
I-  
TLVGKSSKVNKEFAIPDVAVCAPSKPGVVESIDRGEPKAGTCGEVANMAYPQESLVNAVSSANVQKN  
ISMVLAGHPVGEMGISREIERHLETNMCEIFVDKPDVDVALDFSTLTPLRVGLDPPNARVQIDGKES  
RKLMAVLDEADLQRHPKVSQATGLTHNAGVKARLPDDSLILDGVMHGDISFTITDLPEGRV-  
VTPVFNAVKAQLKIDKVLLKAFHVVTLSFSNDKGQEHLIKRLNALKKSTRHYEMLLKIRETECAESPHA  
ISVGKVLKIDALLQTICEAHYKEIEPLLADDLTALGVMGQQGLLHIVPRLMILAVLHVLGLAAAFQVVR  
W-LQQVAIVTTQTLGLRHRTDWSFIAISEVVGNTFFARTKDDDTEQRIHARNPV-VLL-YGKFPMI-  
ISPSGLGLQSTAPSAQDRENTEELILSKERLQDEMGYYVLRILLVFVDEVILAYGSGNDPIKFLVAEQAVT  
GRQNPGMVTLTRRTFPLELQRNATFVMVFEDCTMKNLSHKKMHMNLVVIKSKGWIVNVSTKILISD  
QAIASYAEDAGAHTQPSESALAVITSRVMAPIVLVVSQKPTAPSKTLFLEALSLYDEVTATVLNPKPKYY  
IFEGDVVGKLGLIKGRLLKGVLLVMPNAFRLACVAKAVRMAIAW-----  
-----DFRVRNHDVSTKRSRPYKAHPKFLHKADIDKGLIASGVDTLA  
>GCA\_003664205  
AVIKPVTQDKYAPVLLIRQQEVATVTGAGSPNLRAKTVYRKSGLQRKTSTKWVAAPIYY-  
GVLKMGNIVQLVSISVDNRSVCTVAQVVEQEVVHGLVALDAVKRKIALEEMDGMTTEDPAKVAEF  
EEELDLKKFRDADARADMLPVMLGLTLQIRFDPHEPVVHDLPIPVYIEVI-

GIMADKGGIEVDDCAISNAVSDVDPIAYVSPIDLAAVAGEQMAFIDQEA AVAAAREAEIELEALEAGI  
LVVGISPLLLPV-FGEEGDV-MSFANRSRTLESIVALAVAYPALSRARIDG- IASAM-  
MERAQAAALSEKRGTAEEIRIVKRMQRSSGLADDP ELVILEDAAEGNSSWAGQIYDDPISGSSESDSA  
GNIVHAANKRQNFARSITHLRKVEISDKAAAPLMRGVKHNAKSRSARKLNDEIAVLNFPNVPAGIAIR  
AAAGKSED TLLHDATEREEILLIVVRWHVTWKTA AIVFLTFTAGDIVGLIDMGGIAAVGKPDG LLNRHH  
KLNGSLIEQRPIIEKLT LRLRASLKEKLGAEQIIIFVVKVQGD LVADAKVQMG-  
GPVGAVVAIQGDVIFVRRHKQTVITDQESTV-VLKGVAEGPADAQALLRIRVTHTLVELSVLLIPE-  
PVLVESVTIREGVGKALQIIQLDVYLLRDMGTGTETLAESGSRELIREVLAVDPITGVRLAYGKIKERMKG  
KVGLKDLD-----  
LSILANVTEPRMENMPAGVCRNFIVAGPRAAVGMLFLLDDGGKLYAIDGDLRELLKSVKSLISLVDAK  
APKVL SAGYAEDRLKIRFADCEVLASEAGLYAYKEERELLRMVPVYIILEAKRRQLIIFALS LKGGHRR T  
MMALGVMIAAAIIESQADKGPIHHEEPGILLDDAEVVGSSVMISRQAALDIKQFTKVDVVVIFPEFQEK  
MVVSLKFFCTDVAIFVIALITTVGDMMSREPEHALEEGAGYQKRIRGHSVLFALAVTFDRRNTGRDAT  
ADLFLDLGLAQPRYGILYVNQPKKKQMPSEPDSDRVDGFELVHAIKEDEGSNHELEMPEAMELAVEY  
DASINVSAGVLALSGGMVAVEKVDSKRKVALAATRWNISRLKIQDVHLSGAAPFRSCGNIELADLSAA  
LSDKKLWFLFLPGASNAEEEEKLDGAGASTADAADDKQIAILLVKPVMVVIQDSNAASLVANGGVD  
EWGTMAYKKHYAFAARMRLHMRTID-----  
QMAPNKQKSEKVKTVKLEGDTRFRQLAVDGIKEQMP-LHALNP DFAV-  
LPLLVT PAVGSVAADADVLGAEVPVDASL-  
RELQKSQKGAALPISGVRLLAMRAARGMIEEDIMVAGKIAA-  
LLKIRALETVDIVLRNDSEATLPWRLSVAEKLEADTKRGGGFAARPFKSKPSLCDTQAHAKVADPIQEI  
AAGYVAAEDRFVYPVEGIAIQLITGPHSRVGTAKRAGEGHLHEMAKELLAKAVLMLRNEPDTNTEGL  
LNYLT TNQPTDLLFEDCLDVIIDIRMSV-----  
VHLNTV-  
HVVEGVCEVG DYEI MAAAFPSGLVQVERVDDRTGHER TLMW MYGAMEELWLLSVRWADWVFD  
TPIGAIILHVYAQSINRAFSLKRLQLDGWPKEARWWNTWQLWLNKDGFFGYAAAFRAVKQVLKAT  
LADFEMSDIEEVGRYLSRQEIRAGYRIRENVEFARLDPRTDILLQAQTRL SIIRHALTVVAILVLRDVAPEF  
T-  
VWAYQDVARGHVECVLAESFDFTEKNAHIGPVGLRTPETIFGDGTVMKEAVLGKIDLANTVADFRYLV  
LVDGGRELGV EWSIQNMLYARIWLPPAQAALKNLLPIKFFLQHPELDLAGDWSQFNGISKARADKL  
MAGALVEEILEGIARFADPEATTHQSKKAKHFKYYGEDVDPVHLAYILDIFALVSTQVTISRLLKD RYV  
LNLKVFRALTSLWWLSAQLSDKGPAATVITVGTISGLGALVLFILL-RDSVLVETLYHRYVY--  
MRGYSAAKDVADADPEHFLVLAASRDLEWIEIVPAFFYYFKTAS-  
FEPFNTAVAKEFFGLFEERLRIIDVLVVPDRVEALTEFVALAGTLITSAEA-  
PGVIATGLCEPNAAA VLEAERDWNLHRSMGITLAF FEARDSVKGYFDKGLHKGVAEISLKEAGALTTH  
FHCNAEAKRCVPA AHRVLDLGEIEEALIEIDSAVTVADEEQTLADKPTTRDKTVGAIGGVVLAGTMNM  
GANLDSVERGGNIIIEEEEQYSAVNGKKADGKLT DKVLMVLSLSYFQVIERPASANALDRGVFHLLIEA  
PEDADNLDHGKFMTIPAPSVHTETAPLYAESDIDKIAWIAPLHLLGT LA AVL-  
FEPDQYSFISMMIEASLEITETA EV--  
DYHVLEKGSRP PAFRVVLIKGLHIRLLSAVG TILVVG SAGRAEITAYIQGQAVPITLRKHTFLPAFSPSSCK  
VVDIMSTMLRPPERSTVEMLILETVAEI-  
LEATRGENEKLERMKMLLPGLDMANLLPLVAAASDFS DIVTIDAAITAILSVAAESVVLREMLLT KAEIAI  
TALALALALLMLTADKGLTQKWRAREAQMKELIQSGAVLQVHADDAMVLAATADKVRLDTDEGTT  
SAFASLNLATVSDGFYVLSSAVLQMSADLMMIVAVARVLADKESKNALVVRHPEQVKTQPTYAEGSP



GMVLQTLTQCIPPLAVKADEVELLWTLVAALWRAKAHLASAARPRLERVLILLALGLIVVLMQSEGG  
GMGGG-  
MGAAAKILACFSILT LKASVGDEV RKVTRRVMDLNSRLGRPEEAVNPEFKGEELDQTKYEAENVEVDC  
LETIRRFVDIPFLVSIRTQHNESEDRGARLVLDVTRVRFDL-  
VTCKSDVILVERVETDGIARQMAKDMQSLHPEAAALGKVSSLQHFIALNDGHISNYVTAGVGSVLG  
MLLLVLFIQQVRVAKVWVPTREVTMVFIMAALAVFFLVIGLLVNLVFMIGGISPLQITTLVLGEGVMA  
VRQVSTFPSES-  
ITILQNTYADLICAGRVT KADIELSLHIVVAARVARGTWYVIYHYEISQAQGPSGIMQRAFRQATLSQSL  
IDGRMEVKIKVVTSDRYA-  
TYEIKGGQHRKGTRYNRVKVGHNIPVDVLARIKMAFGDPNLVLKTFGAVVQKRFAQQLT HIRHGAV  
TIGPMEVSSPYIQSKKARHAPGDSVVDVKPDNIVRSVAVVPELIWARENEDQSAVHEKYVKTTHKIAA  
KRSSAVDKAQYDKRNQVHLSFIGLAVKVLPEKAIVQATAGTLLPTESVAVTENLKGIAATIRLDPMEKA  
LIALIKRMRPQLNLQGKTDNKVVKCLNNNLDDVEWGKLGRRKIPITIKSVYDVEHKRATELVKLMPYK  
DDVEGRKSQFAEK--  
ALFEPLKAFMMLFGFIARSVYALSLRVVRR TILLVKT KIVVNASTVLSAIIIGVSIRLRHKSTNVADTKHHI  
KTIEARARMTLAGAPAVKLHLRPGRVGKKGGRIGYMPYKNFNIFDGLASGRRAKV KELAKLKKVDKTI  
TVDGIRTRQQGGRLPQAELSNA L-  
NTRVGVDIVGENEQEASNPRANAEMGQIFAAIDARVYSLVAALIGHALVAVLAVCAITGIGRAHALLA  
VKLKINAGIELHSAA-VAAAVAAA-YAQPGETAAIADVSEGD LGALAVIEESLDVCRLRRRQLG-  
LKKTKKEAYMSLT CFAGKGDVKVIVEATQTQAFEIVATRTAERHGIKAKGTYGKERAMMQITPTKPVKV  
WVPVFNDDPELLAPIRAVAETNGDGVAVVKLTTDIKVTMFEKGVASLAISGKATTLVYTVLEKVTELSK  
DIIYEQRAKAHYGRGRLRSHVVT TTKQKRHL SMIKRTVVASPKMDAARLVDGEVSVVTGATMAFVMS  
EQDAV--  
GDVDMHFHEEPRREAQLGIAGPETFLSTEQPRALALLFLREYLIHIVDIDTTGNFSDAATIFDILRAMQA  
KLDRKLSADIAKVRMCLADDVADMGVTDLAARRDSAGDSILSAYWINGVPAHADIILLVANLECHTA  
PENIDCAVRLFYQRITLQAKERNGDVSVALVPAQNQIEAAEGTVIYTIKGENPGTSQMKNLNEGISRSI  
VKSLAVQLFQVDVFLNDTWIATLLRAAQNVFVDAREGKEAVDHHVVERDTELEFAPQKDILGRKIRVY  
TPAAPSAVVIWDP AIERADKADAQGTILMIYGPDLQDINCFTDIGAEPKIESLKSWEDEKEYVVHRDDI  
PPDI-  
TLVGKSSKVNKEFGIPDVAVCAPAKPGVTESIDRGE PKAGSCGEVANLPYPQDSL VNRVSSANVQKNI  
SMVLGGHPVGEMGISRAVERHLETNMCQIFVDKSDVDVALDFYKLSLTALRVGLDKPNAKVQIDGKE  
SRKLMAVRDGEAELQRHPKVSEESGTR-KAGEKANLPDDTLIYDGVQHGD LKFTSTDLPEGRV-  
VTPVVM AVKAQLEIDKVMLKTFHVVTLSFSNDKGEEHLIKLRNLNALKKSTRHYEMLLKIRDTECAQSPH  
AIPVGKILKIDSL LQTICQAHYTEIEPLLADDTALGVMGDQGLLHVVPRLMILAVLR LIQLEALALIPKW  
ALQQRALITDQTMGLSTRRRDWSF-AISEVVGNTFFARTKDDDEQRLHARNPI-VIL-YGKLG MV-  
ISPSGLRLQSTAPSDQQHGNETKLILSRERLQDAMYYYILKVLLVFVDEMILAYGSGDKPIKFLVANQAI  
TGRANPQLVCLTRRTFPLDLQRDATFVLVLEDSTMKNLSHKKMHMNLVLV KPSWVENVSTKILISD  
QAIASYAEDAGAHTQPS ESALAVITSRVIPIVLVVSQKPTAPSKTLFLEALNLYDEITATVQKRPKRYFIF  
EGDVISVLEGLDAAVLLGMQRPQPDRLRRAITAAAIRLAIAIRASNIVASLENGCINFSRAVSFAA-HY-  
-----DFRVRNHKTSTKRDRPYKGHPKFLHKAEEEEKALVAEGVDTLA  
>GCA\_003789055  
AVIKPVT LNAYAPVLMIRQTQVATVSGAGSPSLRPKTVYAKSGLQRKTSTKWVKKNFY-  
GVLKMANLVQLVSISVDNRSVCQVAQVVEQEVVVRGLVALEAVKRKIALDEISGMTSEDP AKVIVYA  
GELELKRFREADDRADMLPVL LGLTLKIRFDPHQPLVHDL PVPVIFEVV-

GIMAQRGTIEVDDCAISTAVSDVDPIAYVSPIDLEAVAGEKMAYIDQEAAVAQAKTDIALEELALESTV  
LVVGI-PLLIPI-FADEG-T-MSFANRSRKLASIVALAVSAVSITRARIE-AMVSAM-  
MRAARASALAEKRGTAEEIRIVKRMQKAAGLADNPDLILEDAAEQNAQWAGQIYDDPISGSSES  
AGNIVVAANKRQNYARSITFLRRVEISDKASAPLMRGVKHNAKSRSRKLGDITASLNFNPVPEGIALR  
ADMGKPEDMLLHDATEGEEILLIIVRWHTWKTAAFIVLTLRAGDVVGLIELGGIAAVGKPDGLLNRH  
HKLNGSLIEQKRITDKLTLRLRAALKQKLGAEQVILVVKVAGDIVAAAKVQM---  
AVGTVVAIQGPTIFVRRHRQTVVTDSEATVEILRGVAEGPADAQALLRIRVEHTIVKMSVLLIPE-  
PVLVESVSIREGVGKALQIIQLDVYLLRDMGTGEDTLAKSRSRELIRDVLMIDPITGVRLAFGRRLRERVGK  
ALTLELEALF--  
LAITRFVTEPRMETLPAGVCRTHVRAGPRAAVGTLFLLLDEAGRLYAISGDLRELTKSIKSLIGLIDSARPK  
VLSASYATERLRVRYADVTVLSSDVDLYALAEERKEILRMVPVYITTAARRQLVILALSLKGGHRRARA  
ALGLLAAAIRESQAEQGPVHHEAPAILDDAEIVGSEMMISRQSALDLKQVLKVDVIVVFPEFQEK  
VVSLRFFCTEVAIFVIALIVTVGAMLSREPAHAQESGAGFQK----ASILFAEATFERANARDA--  
PDLLMSLALLPPRYGLFYTTQPKKKQMPEEPDEEKVDGFDLIHVVKEDGRSNHELEMPEAMALAVEAS  
ETINVSAGVLAIDGAMVSVVERVDSKRKMAVAVTKWTIAPRAIRDPLSGASPVRLG-  
AEHAAVSAALGAKPIA-  
LYLPGATNAEELEAKLDGAGASSAEAAADRQAAILMVNPVLVVIQDSNAAGLITNGGVDEWGT  
MAYKKHYAFAARMRLHMRTID----GVRMEPNKQKSEKVKTVRLEGDTRFRQLAVEGVKEQMP-  
LHALNPDFVV-LAVLVSPA VGAVAAASDLVGARVPCGASL-  
RELQKSQTGAALPISAVRVLGMGAARAMIEEDIMVAGKIAA-  
LLHIGALETVAGIVLRNDSEATRPWRLSVAERLEADTRRAAGFAARPFKSKPSLCDTQAHAHVAEPIQE  
IAAGYVAAEERFVFPVEDIPIQLILASTHSRVGA AKRAGEGHLHEMAKELVAKADLLVKNAPASNTEGL  
LDYLTTSQPTDLLFTDCLDIIDLRMSIV-----  
VQLALV-HVVIPGARDLADRTIMAANA-  
SGLVQVERVDERTGTERTKMWMYGAMEELWLMSVKWADWVVKTTIGAIVLHVYAQTINRAFS  
LKR  
LQLEGWPPEADRWNTWQLWLNKDGFFGYAAAFRA-  
AAILKAELYDYMSDTQGVRGFSRQELRVGYRIRQQVAFARLDERRDILLQSRTRLAVLRHALAIVAI  
LILRGLVSEFSLVVAEEDVAMGHVECVLAEAFDFTAKNAHIGPVGLRTPPEVLGDGTVFRAAVLGKVD  
LENTVAEFRYRLLTDGGRRLGVTW----  
NMLYARIWLPPAAAALKNLTPISFFLGHPELNLKQFDGDYD-  
ISKARAQRLMAGALVEEILERVARFADPEATTHQSRKARHFKYGGEEVDPVHLAYVLALFALVATQMT  
VSDRLLKDRYVLNMRVFRGFTSLLLLSLQLGEAGPAATVITVGTIAGLGALVFIILL-  
RDSVLVETLYRYTYH-MRGYEA AKDVADAGPEHLLSLAHVTRDVEWIAIIPAFFYFDTAT-  
FEPFNTAVAREFFGLFRERLRIAEVLAVPPVRVEDLVELVALAGTYPTSAAAAPGVACGLCEPNAAGVL  
EADQDWNLHRHMGITLAFPEARVSVKGWFDKGLHKEVAETGLREAGGFTTPFHAGETAKKCIPIHR  
VLDLGDIEAALIEIDSAVTVAGEEQLADQPTTREKAVNAIGGVVLAGTMNMGSNLEQVERSGNIIEL  
EEDQYHAVNGKKANGKLTDKVLMVLSAALFPVLARRASATALDRGAFDLLIEAPDDADNMDHGR  
TL  
SIPAASVHAETHPLYAESEIERIAWIAPLHLLGTLDVAVLGFEQYQSFMSMKISASLGIVETA  
EVLDDYHV  
LEKGGRPDPFRILIKGLHIRVLAGLATIIVVGSAGRTEVTAYIAERAVPISLRRQTFLPAFAPSSCHVIDIFS  
TMLRPPERSAVEMLIETVAEL-LAVTRAETGKLERL-  
LLVPGDLAARLALAALASDFAVIVTIDAAVVAILSVA AEAVVLRRELLSLAEIAVTALALALALLMLTRD  
RGLPQREAAARES QMKELIQGGAVLHVHAGERMVLAATADKVRDLDTEGTTSAFASLNLATVSDGFY  
VLSSAVLQLSSDLMMIVSVARVLADKEMKNALVVRHPEQVKQATYAEGSPGMVLQTLTQAIPLAV  
KPESIELLWTLVHALWRVKSHLASAARPHAERVLLLLALTIVVLMQSEGGG-MGG--

GAAAKILAAFSLLTIKASVGDEVKVTTRRVMDLNSRLGRPEETVNPEFRGAELEQTKFEAENVEVDTME  
TIRRFVDIPFLVSTRTQHNESEDRGARMVLDVSRVRFIDL-  
VTKKSEILAAARAETDGIISRELQKDLQALHPEAAALGKIAALQHFI SLNDGHISNYVTADIH SVLGMLLL  
VLFISQVRVSKVWPTRREVTMVFLLASVAIFFFVIGLGIQIVFMLGGISYQQLTTLVLGEGVMVVRQTS  
TFPADS-  
IGILQNTYAE LICAGRVT KADIEKSLHIVVGARVARGTWYVIYHYEISQAQGPAGILQHA FRQATLSKSLI  
DGRMEVKIKVVSSDRYA-  
TYEIKGGQHRKGT RFLRVKIGHNIPVEILPRLKLAFGDPNLILVKTFGAVVQKRFAQPLTHGRHGAVTIG  
PMEVASPYITNKKARHAPGDSVVELKPDNIVRSVAVVPELIWARENEDQGAVHDKYVKTTHTKTA AKR  
NRAVDKAQYDHRNQVHLSFIGLAVKVLPERAIV-  
ATAGLLLPT EAVSVTEGLRGIAATIRIDPMEKALIAIYIKRMKPQLNLAGKTDKRIVKCLNNGLDDVEWG  
KLGRRRRIKPITIKSVYDVEHKRATELVKLLPYKDDVEGRLSQFAEKNRALFEPLRAFMM LFN YIARAVYAL  
SLRVVVRTILLVKTRIVVNANTVLSAIIIGVSI RL RHKTTNVADTNHYIKTIEARARMTLAGAGKV KLNLR  
PGRVGKKGRIKGYMPYKNYNIFDGLDSGRRAKVAELAKIKKVDKEVSVDGIRQRQQGGRTPKA HLS  
NAL-  
NTRVDVEIVGENEQDESNPRANAEMGQIFAAIDARVYHLVAALIGHALEAILAVAAIMGVGRAHALL  
ALKLRINAGIGFHSAA-VERAVAAA-----  
LKKTKKEAYMKLTCFSGKGDVKIVEATQTQAYEIVATRTAERHGISA KGTYGKERAMMQILPTKPVKV  
WVPIFVNEDELLAPIRAFAETNGDGV DVV KLTTDVKVTMF EKAVASLAVAGRSSSIVYTVLEKVTELMK  
DIIYEQRSKAHYGRGRLRSHVVTNTKQKRHLSMMRRTV VANPRMEAA RLTDGEVS VITGATVAFVM  
SEQDAV--  
GDVDLHYHEEPRREAELGIAGPETFLATEHPRALVLVLLREYLIHIVEIETVGGYSDAATIYDILRPLQSKL  
DRKLSADIAKVRMVLHDDL PDMGVRAEAPRREAAGDPILSAYWINGVPANADIILLIANLESATAPENI  
DCAVRLFYQRITLQAKERGGDVSVLVVKAQNQIEAAEGTVIYTIK GKQP GTVQM KLNVESISRSIVKSL  
AVQLFQVEMFLDDTWIATLLRAAAKVYLD AQSGREAVDHVVERD TDMIKAPQKDILPRKIRIYTPAA  
PSAVVIWDPAIEREDKAE AQGTILKIYGP NLQDISCFTDIGAEPKIESLKAWDEKEKYV VHRDDIPDDI-  
TMVGKSSRVNKEFGIPDVGVVAPAKPGVTESIDAGEPKAGSCGEVANMAYPQESLVNAVSSANVQK  
NISMVLGGHPVGEMGIAREVERHLETNMCEIFVDKPDVDVALDFYRLALTALRVGLDSPNAKVEIDGK  
ESRKLMAVRDGEAALQRHPKVSEVAGTGA-AGVRARLAEDALIH DGVHHDIGFTVTDLP PGRV-  
VTPVTINVKQQLKIDKVILKTFHVVTLSFSNNKGEDHLIKRLNALKKNTRHYEMLLKIRETECAESPHAI  
PVGKILKIDALLQTICIAHYTAIEPLLADDLAALGVMGDQGLLHVPRLMILAVMHLWGLEAALELPR  
WGLMARIGLTDLT LGLAVRDRHFTF-AISEVVGNTFFAMTKDDDTRDRLHARNPI-VLL-  
WGKFAMV-  
ISPSGLLLASTPPSAMRHGNEGDLILSTERLKDEMAYYVLQVLLVFVDEVILAYGSGDRPLKFLVADQA  
VAGRENPG LVCLTRRTFPLDLQRDATFVLVFEDSTMKNLSHKKMHMNLIIKSKGWV VNVSTKILISD  
QAIASYAEDAGAHTQPS ESALAVITSRVIAPIVLVVSQKPTAPSKTCFLEALNLYDEITATVQNAPKRYI  
FEGDLISVLGTIDA AVLKGLQRPQPDRMRRAVIAAAIRLAI AARVSNLLHALETGTINFARSITFML-  
SYAAVTL--DAPMGPDAIAFRVRNHKTSTKKDRPYKGHTKFLHKA EAEKALVAEGVDTLA  
>GCA\_004000435  
AVIKPFLYTKYAPVLMIRQQQVATVSGAGSPSLRAKTVYAKSGLQRKTETKWWAKPLY-  
GVVKS GNLVQLVSISVDNRAVCTVAQVVEQEVVHGLVALEAVKRKIALEEINGMTSEDPAKVIQY-  
DELELKRFRDADDRADLLPVLLGLTLKV KFDPHQPVVHDL PAPVIFEVV-  
GIMAQKGTIEVNDCAISTALSDVDPIAYVSPIDLEAVAGDEMAYIDQESAVSAAKEAISLEELALESVILV  
VGI-PLLIPV-FRDDADT-MSFANRSRSLESIVDLAVSAEHRNRARIG-NIASAM-

MDRAKAEALCEKRGTAEEIRIVKRMSRSAGLADDPPELVIMEDAAEGNSAWAGQIYDDPISGSSESDSA  
GNIVHAANARQNYERSITFLRKVEISDKAAAPLMRGVKHNSKSRSSRKLNDIAIDLNFNPVPEGIAIRA  
AGGRTTDTLLHDATEGEEILLIWRWHVTWKTAILVLVITAGDIVGVIELGGIAAVGKPDGLLRHHKM  
NGSLIEQRRVIEKLT LRLRAALKQKLQKEQVIFVVKVAGDLVAEATVQMG--  
DVGTVVAIQGDVIFVRRHKQTVITDQEATVEILRGVAEGPADAQALLRIRVDHTLVDVSVLLIPRVPVL  
VDSVTIREGVGKALQIIQLDVYLLRDMGTGEETLAKSASRELIREILQVDAITGVRLAYGDLRERTAGGLK  
LKELD-----  
LSIRVGVTEPRMENLAEGVRRDFIEAGPRAAVGTLFLMLDEAGRIWSIDGDLRENPKSIKSLIGLVDAAK  
PKVLSAGYATTRLRVRYADCMVLDAEANYAYREERRELLRMVPVYIIVAAKRRQLVIFALSLKGGHRR  
ARAALGVLIAAAILESQAEMGEVNHAAPVVLLDDAEIVGSEMMISRQSALDLKAILKVDIIVLFPEFQEK  
MVVSLKFFCTDVAIFVIALIVTVGEMLSREPSHAQEAGAGFAKRIRGSVLFALAATFDRRNAGVDSL  
DLFLGLGLAPPRYGLFYTTQPKRKQMPAEPDAERVDGFELVHAIKADSADNHVLEMPEAMALAVEA  
NGSINLTGGVLGMNNGMAAIEKVDSKRKLALAATKWNISPVQILDISLGGASPVRALN-  
IELAQLTAALGDKTVWFLFLPGANNAELEEAKLDGAGASSVDVAEDRQQGILLVAPVIVVIQDSNAAS  
LIANGGVEEWGTMAYKKHYAFAARMRLHMRTIDAIEIGIALEPNKQKAEKVKTVKLEGDTRFRQLAVE  
GVKEQMP-LHALNPDAFV-LAVLVSPAVGRVAAEAVALGAEVPCDASL-  
RELQKSQKGDALPISAIRVLGMRAARAMIDEDIMVAGKVAADLLKIRALQTIIAIVLRNDSEATLPWRLS  
VAERLEADTKRASGFAARPFASKPSLCNTQAHAKAAEPIQEIAAGYVATAQRVFPVEGLAIQLFMSN  
PLSRIGLQKRAGEGHLHEMAKELLGKAVLMVLNEPDTNTEGLFNLYLTTHQPTDLLFPDCLDVIIDLRR  
MSVI-----IQLNTV-  
HVVVAGVRDVGSYQIMAAAAPSGLVQVERVDDRTGRERTMMWMYGAMEELWLMSVTWADWVI  
DVPIGAIVLHVYAQVINRAFSLTRQLLEGWPMEADRWWNWQWLWLNKDGFFGYEAAFKE-  
LAILKSDLYDYELKDVDVGRMLSRQELRVGYRIEEVEFEKLDPRTDILLQSKTRLSVIRQALALVAILIV  
RTIVSEFS-  
VVAEEDVAMGHVECVLADMFSFTAKDAHIGPVGLRTPDPVFGDGTVFKA AVL GKID LANTVAEF RYK  
FIIDGGRELGV DWIGLVNMLYPRIWIPPAPAALKDLLPIKFFLSHPELDLSVLREVFDGISKARAEQLMA  
GALVEQIIDNVA AFADPEATTHQSHKEKHFKYGE EVD PVH LAYILDIFALVATQVTVSDRLLKDRYVL  
NMRIFRGITSM L WMSLQLGNKGPSATII TVGSVAGLGALVIFI LL-RDEV LVETLYHRYVY-  
EMRGYSAAKDVADAQPEHFLSLAHVSRDVEWIEVIPAFFYYFNTAG-  
FEPFNTAKAREFFGLFEERLRVIDVLVPRERVEALSEFVALAGTLTTS AQALTGVITTFCEPNAAAVLE  
ADQDWN LHRTMGITLAFKKAQVSVNGWFDKGLHKDVAEVLREAGFTTPFMAAVTVKRCVPAV  
HRTL DLGDIDAALIEIDSAVVVADEEQTLADKPTTRDKAVNAVGGVVL AGTMNMGANLEQVERGN  
NIIIELEEEQYHGVNGKKADGKLT DKVLMVLSA AFFPV LARFASANALDRGVFELLIEAPDDADNLDH  
GRELSIPAATILTETAPLYAESEIERIAWVAPIHLLGTLD AVLGFE PDQYSFISMMIEASLDIMETA EVMED  
YHVLEKGGRRPPDFRIVLRGLHIRKMAGIGTIIVVGSAGRTEITAYIQG-  
AVPITLKRVTF LPAFAPSSCIAVDIFSTILRPPERSAVVTMILETVAEL-  
LEVTRIENDKLERLLLLPLGLDVAALLALLAAAKDFAVIVTIDAAITAILSVA AEAVVLRELLLDLAEI AVDA  
LALALALLMLTPDTGLHQKERPREAQMKELIQGGVVLQVHAADAMVLAATADKVRLSTDEGTTSAF  
ASLNLATVSDGFYVLSSAVLQLSSDLMMIVSVARVLADKETKNALVVRHPEQVKTQPTYAEGSPGMV  
LQTLTQCIPPLAIKPQEIELLWTLVAALWRVKAHLASATRPHNERILVLM LALALIVVLMQSEGGMG  
GG-  
LSGAAKGLAAFSILT IKAVGDEV R KVTRRVMDLSSRLGRPEETVNPEFRGAEELEQSKFEAENVEVDTIE  
TIRRFVDIPFLVSTRTQHNESED RGARMVL DVTRVRFIDL-  
VTKKSEIILAA RVETDGIAREMQKDLQALHPEAAALGKVAMLQH FVSINDGHISNYVTADIHSVLGML

LLVLFIQETRIAKVWVPTREVTMVFLAVTAIFFLVIGLAVQIVFMLGGISYQQITTLLVLEGVMGVRQ  
TSTFPADS-  
IGIMQNTYADLICSGRVAKADIEQSLHIVVGARVARGTWYVIYLYEISQAQSESGIMQRAFRQRTLSQS  
LIDGRMEVKIKVVTSDRYA-  
TYEIKGGQHRKGTRYNRVKVGHNIPVDVLPRLKMAFTPPNLVLVKTFGAVVQKRFAQPLTHMRHGA  
VTIGPMEVASPYIRNKKARHAPGDSVVDLKP DNILRSVAVPELIWARENEDNGAVHDKYTKTTHKL  
QAKRTRAVDKAQYDKRNQVAMSFGLAVKVLPDKAIVHATAGSLMPTASVAVTEGMKGIAATIRLDP  
MEKALIAYIKMRPQLNLAGKTDKKIVKCLNNNLDDVEYGKLGRRRIKPLTIKSVYDVEHREATELVKL  
MPYKDDVEGRKSQFAEK--  
ALFEPLKAFMMIFGFIARAIYALSLRVVVRTILLAKCRIVVAAATVLSAIKVIGVSIRLRHKSTNVAETKHYI  
KTENRARMTLAGAGQVKLHLREGRVGKKAGRIKGYMPYKNFNIFDGLASGRRRAKVKEVAKLKKVVK  
EIEVTGIRMKQQGGRTPKADLSNAI-  
NTRVDVEIVGENEQAESNPRANAEMGQIFAAIDARVYSHVGALIGHALAAVLAMADIWGIGRAHAL  
LAVKFRMNAGIEMHSAA-VEVAVAAA-YAKSAGEA-  
VIADVSEGLGAVSITKESLTVCLRRRQLSELKTKKDAYMSLTCFAGKGDRVKIIDASQTQAYEIVAT  
RTAERHGIKAKGTYGKERAMMQIVPTKPVKVWVPVFTAEALLAPIRAFAETNGDGVTVVKLT KDIV  
TMFEKAVASLAVTGKSTSVVYTVLEKVTLSKDIIEQRSKAHYGRGRLRSHVTTTKQKRHL SMIRRTV  
VADPRMEAARLTDGEVSVITGATMAFVMSEQDAV--  
GDVDLHFHEEPRREAAVGIAGPETFLT TAQPRLLAVIFLKEYLIHIIDIGTVGGFSTAATIFDILRAMQNK  
DRKLSADIAKVRMVLHDDVADMGVTELAPRRETAGDAIL SAYWINGVPANADIILLVANLEAPCVPE  
NIDCAVRLFYQRITLQAKERGGDVS HVVPAQNQIEAADGTVIYSTKGPQPGTAQ MGLNVEGISK SIV  
KSAVQLFQVDLFLNDTWIATLLRAAEDVVFVDAKEGKEAVDHVVERDTELEMAPQKDIVARKIRIFTP  
AAPS AVVIWDPAIEREDKADAQGTILKIYGNLQDISCFTDIGSEPKIESLKAWDEKEYVVRDDIPEDI  
TTLVGKSSRVNKEFGIPDVEVCAPAKPGVTESIDRGE PKAGTCGEVANMAYPQESLVNAVSSANVQK  
NISMVLQGHVPVGMGISRGVERHLETNMCEIFVDKDDIDVALDFYILALTPLRVGLDLPNARVEIDGKE  
SRKLMAVRDGDAGLQRHPKVSESVGISQGAGSKAKLPDDALIH DGVQHGDIFRTATDLPEGRV-  
VTPVFNDVKAQLKIDKVILRSFHVVTLSFSNDKADEHLIKRLNALKKSTRHYEMLLKIRETECAESPHAI  
SVGKILKIDALLQTICKAHYTAIEPLLADDTALGVHGEQGLLHVVPRLMILAVLHLWGLEANAAALRVW  
DLQRESLVT DQTMGL-VRDRDWSF-AISEVVGNTFFARTKDDDTAQR LHARNPV-VLL-  
YGKFGMV-  
ISPSGLRLDSTPPSAREHGN AEQLVLSTERLQDAMAYYILRVLLVFVDEVIVAYGSGAEPLKFLVAEQAV  
TGRDNPGMVTLTRRTFPIDLQKDAVFVLVFEDSTMKNLSHRKMHMNLVLIKSKGWIVNVSTKILISDQ  
AIASYAEDAGAHTQPSALAVITSRVIPIVLVVSQKPTAPSKTCFLEALS LYDDVTATVLNAPKKYYIF  
EGDVISVLGGLDAAVLLGLQRPQPDRLRRAVVAAAIRLAIAIR-----  
-----EFRVRAHKTSTKRDRPYKAHPKFLHKAEEKKLVAAAGVDTLA  
>GCA\_004145405  
AVIKPVTMNAYAPVLMIAQSQVATVSGAGSPSLRAKTVYAKSGLQRKAETKWVAKDFYY-  
GVVKMATLVQLVSISVDKRAVCTVAQLVEQEVVHGMVALEAVKKKIALEAIDGMTAEDPAKVVDY-  
TRIAIRKWRDADDRADLLPVLLGLTLKIKFDPHQPLVHDLPIPVIFEVV-  
GVMAQKGTIEVDECGISTAVSDVDPIAYVSPIDLA AVSGSAMDYIDQESAVAAAKQSIDL--  
LALESTVLVVGIKLIIPV-FRERADE-MSFANRSRSLGTIVDLAVSFPEQSRAR--SAFVAAL-  
MDASQAAAALAEKRGTAEQIRIVKRMQRSAGLADDP ELMLEDAAEGNSNWAGQIYDDPISGSSES  
SAGNIVYAANKRQNFARSITYLRQVEISDQADAPLMRGVKHNAKSRSRKLDDAIATLNFNPVPEGIA  
IRAEARKPEQTL LHDAAE GEGILMLIVRWNVTWKT AIIIIY LLELAGD TVGLIELGGIAAVGRPDG LLNRH

HKLNGSLIEQKRVIDKLTLLRLRAALKQKLGAEQVILVVRVQGD LVAQAEVQMG--  
DVGAVVAIQGETIFVRRHRQTVIGDQEATV-VLRGVAHG PADAQALLRIRVDHTLVKLSVLMIPQ-  
PVLVESVTIREGVGRALQIIQLDVYLLRDMGTGEETLAKSR SRELIPELLQIDPITGVRLAYGGLRERESKA  
LSIKEIDTLF--  
LAILRGVTEPRMQTLPAGVCRNFVRAGPRAAVGMLFLILDDAGKIYPIDGDLRENTKSIKSLIGLVDAAK  
PKALSAVYMTERLKIRYADVQVLTSDADLYAYAEARRELLRMVPVYITNQAKRRQLVLLALSREGHRR  
VRMAIDVMIAAAIIESHADNGAVHHAEPRIILLDDAEVVGSEMMISRQAALDLKQVIKMDVIVLFPFQ  
EKMVVSLRFFCTDVAIFVIALICTVGSMLSREPSHAQEGGAGFQKRIRAHSVLFALAASFDSANLRVE-  
V-  
SLFLRLGLAPPRFGLFYTTTPKRKQMPEEPDKDKVDGFDLVHAVKEDGRDNHKLMEPEAMALAVEAD  
ASINVSGGVLAMDGEMAAMEKVDSKRKMALAVTKWTIASLDLLDILISGAAPIRALK-  
IEDAEVTAALAKKELWFLYLPKANNAELETDKIDGAGSSTVDAADRQQGILLNPNVLVVIQDSNTASL  
ISNDGLDEWGT MAYKKHYAFAARMRLHMRTIDGVEVGVMMQPNKQKAEKIKTVKLEGDTRFRQLA  
TEGVKEQMP-LHALNPDFAV-LAVLVTPAVGRVAADEDVLGARVPCPASL-  
RELQKSQKGDALPISAIRLLGMRGARAMVDEDIMVAGKVAASLLVIRAVQTILEIVLLNDSEATLPWRL  
SVAERIEADTARAAGYAARPFNSKPSLCNVQAHARVADPIQEIAAGYVAEDKRFVFPVEDLPQILILAS  
PHSRVGGAKRAGLGLHEMAKELLGKADLMVQAASDTNTEGLLKYMTTRQPTDLLHPDCLDTVIDL  
RRMSVV-----VQLNTV-  
HVVVKGVDVG DYEIMQAAAPSGLVQIERIDRTGRERTRIHMYGAMEELWLLSVRYADWVVDCCI  
GAIVLHVYAQVINRAFSLDRLQIAGWPPEASSWWNTWQLWLNKDGFFGYEAGFRAQAAVLASALA  
DYQMKDVEGVGRYPSRQELRVGYRIRDQVAYARLDPRTDILLQSQTRL SVIRHALDVVAILIVREVIE  
FTLVVAEEDVAMGHVECVLADAFDFTAKNASIGPVGLKTPAPVLGDGTVLNDAVLGKIDLANTVADF  
RYRMIDDGGRALGVWLT LRNILFERIWLPPAQAALKNLQPICFFLGHP ELNLALLEALWDGISKARM  
AALMATALIEQILDRVA AFADADATTHQSNKAKHFKYYGEEVDPVYLAYI----  
ALVATQVTVSDRLLKDRYVNLKVFRGLTALWWLGAQLAQKGPAATIIALDSIAGLGALVLFILL-  
RDAVLLETLYFRVY--MKG YDAAKDVADAEPEHLLNLA AVSRDVEWIEIVPAFFYYFTTAG-  
FEPFNTAVAREFFGLFRERLRIVAVLAVPPERVEELVEFVALAGTLETSAEAQPGVIACGLCEPNAASVK  
EADQDWNLHRSMGITLAFYDARESVKGWFDKGLHKPVAETGLSEAGALTTPFHA EVTAKQCVPALH  
RTL DLGEIEASLIEVDSAVVVADEEQTLADKPTRDNSVGAVGGVVLAGTMNMGSNLDAVERGGNIII  
ELEEEQYSAVNGKKDGMKLT DKVLMVLSAAYFAVLARASSANALDRGVLDLLIDVPDDADNRDQGR  
EL-----  
PDQYSFISMMIEASLEIMETAEVLDDYHVLEKGSRPPEFRVILIKGLHVRLLAGIATIIVVGSAGRAEVTAY  
ISG-AVPITLNRVTFLPAFAASSCHVIDIFSTMLRPPERSAIKMLILETVAEL-  
LEVTRLENDKLERMEILLPGLDMAQLLGLGAAASDFPQIVTIGAAIVAILSVA AEPPVLRDMLLSLAEIA  
VEAMALALALLMLTPDQGLTQKEAPREAQMKLIIQGGVVLQLRAADRMVLAATADKVRLDTDDG  
TTSASFASLNLATVSDGFYVLSSAVLQLSSDLMMIVAVARVLADKEHKNALVVRHPEQVKTQTTYAEG  
SPGMVLQTLTGAVPPLAIKAEVEELLWTLVAALWAVKAHLANATRPRHERVLILALTLITVLLQSEGG  
GIGGG--GPAAKALAAFSILT IKAKADDEVKVTTRRVLDLNSRLGRPEESVNPEFRGAELEQSK-----  
-----EVTRIRFIDL-  
VTKRSEILAARAETDGIIAREMKGDLAALHPEAAALGKIAALQHFI AVQDGHISNYVTAVINSVLGMLL  
LVLFINETRIAKVWVPTRRREVTMVFIMAALAAFFIVIALLSIVFMLAGISWQQMTTIVLGEGVMAVRQ  
TSTFPKDS-  
IGILQNTFADLICAGRVAKADIEKSLHIVVAGRVSRGTWYVIYLYEISQAQSEAGIMQRAFRQKTL SQSL  
IDGRMEVKIKVVTSDRYAQTYEIKGGQHRKGTRFN RVKVGHNIPVDVLPRMKMAFAPPNLVLVKTFG

AVVQKRFASALTHMRHGAVQIGPMEVSSPYIQAKKARHAPGDAVVDLKPDNIVRSVAVVPELIWAR  
ENEDNGAVHDKYVKPTHKLQAKRRTAVDKAQYDHRNQVALSFIGLAVKVLPAKAIVHATSGQLMPT  
TSVAVTEGMKGIAATIRLDPMEKALIAIYIKMRPQLNLQGKTDKKIVKCLNGLDDVEYGKLGRRIKIP  
ITIKSVYDVEPERATELVKLLPYKDDVEGRKSQFAEK--  
ALFEPLKAFMMLFGFIARSVYALNLRVIRRTILLVKCKIVVAAATVLSAIKIVGLSVRLRHKSTNVADTKH  
HIKTITARANLTLGAGKIKLNLSEGKVGKKGGRIKGYMPYNNYNIFDGLASGRRAAVKEVAKLKKVDK  
EIKVDGVRQKQEGGRTPKAQLSNALANTRVGVDIVGESIQEQSNPRANAEMGQIFAKIDARVFSHVG  
ALVGHVLVAVLAVVSIWGIGRAHNLLALRLINAGIEMHSAA-VDEAVACA-  
FAAPAGDASLFIDASEAYVGAMLITTQATDTCRLRRRSLSELKTKKDAYMSLTCFAGKGDKVKIVEAA  
QTQAYEIVATRTAERHGIKAKGTFGKERAMMQILPTKPKVWVVPVFGEDELLAPIRQVAETVGDGV  
TVVKLQNDIKITPFKAVASIAVTGKSTSVIYTVLEKVTQLSKDIIYTRAKAHYGRGLRSHVVTHTKSN  
RHLSMIKRTVVADPRMDAERLTDGEVSVVTGATMAFVMSEQDAV--  
GDVDMHFHEEPRREAALGIAGPETFLATEHPRTLAVLFLRAYLIHIVEIETVKGFSGAATIYDNLRAMQN  
KLDRKLSADIAKTRMVLVDNVEDMGVTDVAPKREAAGDPILSAFWINGVTANADIILLVANLEVPTVP  
ENIQCAIRLFYQRVTLQAKERGGDVSVAVVPASKQIEAAEGTVIYSIKGKTPGTGQMKLVEGISRSIVK  
ALAVQLFQVDLFEDTWLGTLLRAAIDVVFVDAGETKEAVDHVVEHDTTEERIPQKDIVSRKIRIYTPAA  
PSAVVIWDPADREDKADAQGTILKIYGPNLQDINCFTDIGAEPKIESLKAWDEKEYVVRDDIPEDID  
TLVGKSSRVNKEFAIPDVAVCAPSKPGVTESIDRGEPKAGTCGEVANMAYPQESLVNNVSSANVQKN  
ISMVLAGNPVGEMGISREIERHLETNMCQIFVDKADVDVALDFYILSLTPLRVGLDKPNARVQIDGKES  
RKLMVLDGEADLQRHPKVSQAAGTGT-AGVKARLPDDTLEVDGVVHGDLSFTATDLPPEGRV-  
VTPVFNAVKAQLKIDKVLKAFHVVTLSFSNGKGEDHLIKLRLNALKKNTRHYEMLLKIRETECAESP  
HAISVGKVLKIDSLLQTICVAHYKAIPELLADDLTALGVMGQQGLLHVPRMLAVMHLWGLEAQLELPH  
WRLQARA-VTDQTMGLSVRERHFSY-CISEVVGNTFFARTKEDDTEQRLHARNPV-VLL-  
AGKFGMV-  
ISPSGLRLASTPATSLGRGNADDLILSTERLQDAMGYVLRILLVFVDEVILAYGSGERPLKFLVGDQAV  
TARQNPGMVTLTRRTFPLELQRHAVFVMVFEDCTMKNLSHKKMHMNLVLIKSKGWIVNVSTKILISD  
QAIASYAEDAGAHTQPSSESALAVITSRVMAPIVLVVSQKPTAPSKSLFLEALSLYDEVTATVFNAPKKY  
YIFEGDVSVLEPCDAAVLLGMQRPQPDMMRRRAVADAIRLAIALRASGIVTRLGEGLINFARAVSFA  
APCYRLLRL-CGAALA-PALAFRVRNHSVSTKRSKPYKGHTKFLHKADLNKSLIAAGVDTIA  
>GCA\_004145845  
AVIKPVTQKEYAPVLMIRQQQVATVSGAGSPSLRAKTVYRKSGLQRTSTKWVASNFYY-  
GVLKMGKIVQLVSISVDNRAVCTVAQLVEQEVVHGMVALEAVKKKIALEAIDGMTSEDPKVIQYA  
QELELKRFRDAEDRADLLPVLLGLTLKIKFDPHPVVDLPIPIYEVV-  
GVMAQRGTIEVDDCAISTAISDVPDIAYVSPIDIAAVAGEKMAIDQEAAVAAAKAEIDLEELAESKVL  
VVGI-PLLIPV-FAADGDT-MSFANRSRTLETIVDLAVAYPEITRARIA-DFVADM-  
MDRAKASALAEKRGTAEEIRIVKRMQRSSGLADNPDLVILDDAAEGNAQWAGQIYDDPISGSSES  
SDSAGNIVHAANKRQNFARSITYLRKVEISDQAAAPLMRGVKHNSKSRAARKVDDAIAGLNFPNVPEGIAI  
RAEAGKPADTLLHDATEGEEILLVVRWHVTWKTAIAVFLIGTPGNVVGIMTMSGIGAVGKPDGLLNR  
HHKLNGSLIEQKRIMDKMTLRLRAALKQKLGAENVILVVKVAGDLVADAKVQM---  
AVGAVVAIQGETIFVRRHKQTVITDQEATVEILRGVAEGPADAQALLRIRVEHTLVKLSILLIPEVPVLVE  
SVTIREGVGKALQIIQLDVYLLRDMGTGQETLAKSCSRELIRDLLMVDPIITGVRLAFGKMKERLTREIKM  
KDLETLL--  
LAIADGVTEPRMANLPDGVFRDFVEAGPRAAVGTFLLLDEAGKVYTIDGDLRELPGIKSLIGLVDASK  
PKILSAQYATARLKIRYADVSVLSSEANLYAYKEERRELLRMVPVYIVLAAKRRQLIIFALSILKGGHRRAR

AALDILIAAALLESQASEGDVNHADPAVLLDDAEIVGSTIMISRQSALELKSILKTDVIVVFPEFQEKMVV  
SLKFFCTEVAIFVIALICTVGQMFSREPNAAQEGGAGFQKRIRGHSVLFALAVTFDRRNLRTA-  
APGLFLGMGLAGPRYGIFYTNRPKKKQMPSEPDKDRVDGFELVHAIKADTTD-HKLELPEAMALAVE-  
DAPINLSAGVLAMNGGMTAVERVDSKRKMALAAEKWSISKLSILDLSLSGAWPTRALD-  
IEQADLTAALAAKEIWFLPLPGANNAELEEKLKGAGASTVEIAADRQSEILLVVPVWVIQDSNAASLI  
ANGGVEEWGTMAYKKHYAFAARMRLHMRTIDAIELGVDLEPNKQKAEKIKTVKLEGDTRFRQLAVEG  
IKEQMP-LHALNPDFAVLVAVLVTPAVGLVAAEADV LGARVPCDFSL-  
RELQKSQKGDALPISAIRLLGMRAARAMIDEDIMVAGKVAA-  
LLKIGSLETIVKLVLLNDSEATIPWRLSVAERLEADTKRSGGYAARPFKSKPSLCNVQAHANVADPIETIA  
AGYVAVEERFVYPVEGIAIQLILASPHSRVGSAKRAGEGHLHEMAKELKAKAVIMVRSEPDNTNTEGLLN  
YITTQQPTDLLFEDCLDIVIDMRRMSVV-----  
IQLNTI-  
HVVVPGARDVADFEIMAAAAPSGLVQIERVDDRTGRERTKMWMYGAMEDLWLMSVTWADWVPD  
CAIGAIVLHVYAQVINRAFLSLKRLQLEGWPKEADRWWNTWQLWLNKDGFFGYDAAFRA-  
LQVLKAELYDYEMNDINAVGRYQSRQQLRVGYRIRQQVAYERLDPRTDILLQSQTRLVIRHALKMOV  
AILIVRDIVVEFTLVVAQEDVAMGHVECVLAESFDFTKQKNAGIGPVGLRTPDDILGDGTVFQEAVLGKI  
DLANTVADFRYRFIVDGGRALGVKWIDL-  
NMLYTRIWLPPAAAALKNLTPIKFFLGHPLELLSLSMFDGISKARADRLMAGVLVEQILDRVAFAE  
PEATTHQSKKKRHFYKYGEEVDPVHLAYILEVFALVATQVTVSDRLLKDRYVLNLKV-  
RSFTSLLWLGLQLGDKGPAATVITVDTIAGLGALVLFILL-RDTVLVETLFYRYVY--  
MKGYEAAKDAADALPEHFLPLGAASRDVEWIEIVPAFFYYFKTAT-  
FEPFNTAVAKEFFGLFEERLRVVEVLAVPPDRVEALLAFVALAGTLATS AEALPGVIATGFCEPNAAA  
EADQDWNLHRTMGITLAFKQDSVKGWFDKGLHKTVA AVSLKEAGALSTPFLAEVEAKVCCPAVH  
RVIDLGEIEAALIEIDSAVVVADEEQTLADRPTTRDKSVGAVGGVVLAGTMNMGAALDQVERGGNIII  
ELEEEENYHAVNGKKADGKLTDKILMVLSAAYFPVLRRTTSANALDRGVFGLLIEAPDDADNLDHGREL  
TIPAPTIH-ETTPLYAESEIERIAWIAPMHMLGTLPVL-  
FEPDQYGFISMMIEASLDITETA EVLDDYHVLGRSRPPDFRVVLIKGLHIRLLAGIGTIIVVGSAGRSEVT  
AYING-AVPISLKKQTFLPAPASSCHIVDIFSTMLRPPERSTVMMLILETVAEL-  
LEVTRIENDKLERLQVLLPGLDLAELLGLVAAAEDFAAIVTIEAAITAILSVAAEAVVRELLLSLAEIAVTA  
LALALALLMLTPDQGLTQKEVARETQMKELIQGGVVLQVHAGDRMVLASTADKVRLDTDEGTTSA  
FASLNLATVSDGFYVLSSAVLQLSSDLMMIVSVARVLADKETKNALVVRHPEQVKTQATYAEGSPGM  
VLQTLTQAVPPLAIIKAEDVELLWTLVAALWRVKAHIAAARPHTERVLILALSLIIVLIQSEGGGMGG-  
-  
VSSAAKILAGFSILTIKAKVGDEVKVRTRRVM DLNGLRPEEAVNPEFRGAEELEQSKYEAEENVEVDC  
METVRRFVDIPFLVSIRTQHNESED RGARLVLDVTRVRFDL-  
VTKRSEIILAA RVETDGIIAREMAKDLQALHPDAAA LGKVAALQH FVSLSDAHVSNYVTADIHSVLGM  
LLLVLFIQQTRI AKVVWPTRREVTMVFIMAVLASFFLVIGL--  
QIVFMLSISYQQLTTLVLGEGVGLVRQTSTFPADS-  
IGILQNTYADLVCAGRVTKADIENSLHIVVGARVARGTWYVIYLYEITQAQGGQSGIMQRAFRQATLSQ  
SLIDGRMEVKIKVVTSDRYA-  
TYEIKGGQHRKGRYNRVKVGHNIPVQVLPRLKMAFGPANLILVKTFGAVVQKRFAQPLTHIRHGAV  
TIGPMEVASPYIQNKARHAPGDSVVDLKP DNIVRSVAVVPELIWARENEDNGAVHDKYVKTTHKLA  
AKRKRAVDKAQYDKRNQVALSFIGLAVKVLPEKAI VQATAGTLLPTESVAVTEGLKGIAATIRLDPMEK  
ALIAYIKMRPQLNLGGKADKKIVKCLNNNLDDVEYGLGRRKIKPLTIKSVYDVEHREATELVKLMPY



KDDVEGRKSQFAEK--  
ALFEPLKAFMMLFGFIARAIYALSLRVVVRTILLVKTQVVVNASTVLSAIIIGVSIRLRHKSTNVADTNHH  
IKSIEARARMTLAGAGKVKLHLREGRVGKKGRIKGYMPYKNFNIFDKLESGRRAKVKEAKLKKVDKEI  
AVEGIRVKQQGGRTPKADLSNAIANTRVGVDIVGENEQEESNPRANAEMGQIFAAIDARVYSLVGAL  
VGHAEAILAICAILGIGRAHALLAVKLKVNAGIEMHSAA-VETAVACA-FAQPAGEA-  
TIADVSESYLGAISITDTSLDVCRRPRRSLSLKTKKDAYVSLTCFSGKGERIKVIEASQTQAYEIVATRT  
AERHGIKAKGTYGKERALMQITPTKPVKVVVPVFVNEEELLAPVRAFAETNGDGVTVVKLTDKIKVTM  
FEKAVASLAVSGKATSVVYTVLEKVTELAKDIIYEQRAKAHYGRGRLRSHVVTTKQKRHLSMIKRTVV  
ASPHVEASRLHDGEVSVITGATMAFVMSEQDAV--  
GDVDLHYHEEPRREAALGIAGPETFLVTEQPRLLLFLTLRAYLIHVIDIGTVGGIADAATIYDILRAMQNK  
LDRKLSADIKVRMCLHDDLQGMGVTEAAARREEAGDTILSAYWINGVPANVDIVLLVANLEVPCVP  
ENIDCAIRLFYQRITLQAKERGGDVSVAVVKAQNQIEAAEGTVIYSIKGNKPGTVQMMLNVEAISRSVV  
KSLAVQLFQVTLFLDDTWIATLLRAALKVVFVQAEDGKEAVDHVVERDTELEFAPQKDILPRKIRIYTP  
AAPSAVVIWDPAIEREDKADAQGTILKIYGPNLQDISCFTDIGAEPKIESLKSWEKEKYVVHRDDIPEDI  
-  
TLVGKSSKVNKEYAIPDVAVVAPAKPGVTESIDRGEPKAGSCAEVANMAYPQESLVNAVSSANVQKN  
ISMVLAGHPVGEMGISRGVERHLETNMCEIFVDKADVDVALDFYKLSLTPLRVGLDRPNKAVQIDGKE  
SRKLMAVLGDGADLQRHPKTSATGLTQGAGVKAKLPDDALIVDGVQHGDIKFTATDLPDGRV-  
VTPVYNAVKAQLDIDKVLKTFHVVTLSFSNDKGEEHLIKRLNALKKSTRHYEMLLKIRETECAESPHAI  
SVGKILKIDALLQTICTAHYTAIEPLLADDTALGVMGRQGGLHVVPRMLAVLHVVDLDARAYINRW  
WVMARAIVTDITMGLDQRDRNWTF-AISEVVGNTFFARTPDDDTEQRLHARNPI-VLL-  
YGKFDMV-  
ISPSGLRLESTADTDQEHGNADRLILSAERLQDAMGYFVLQVLLVFVDEVLLAYGSGDEPIKFLVAEQA  
VTGRQNPQMVTLTR-  
TFPLDLQRDATFVLVNEDSTMKNLSHRKMHMNLVLIKSGWIVNVSTKILISDQAIASYAEDAGAHT  
QPSESALAVITSRVIAPIMVISQKPTAPSKSLFLEALALYDAVTATVLNPKRYYIFEGDVVSVLDTVDA  
AVLKGMQRPQPDRMRRAVIAAAIRLAIAG-ASRMSTRLEAGIVNFSRAISFVG-RYTAVAL-----  
--EFRVRNHSVSTKRSKPYKAHTKFLHKADVEKGLVAAGVDTLA  
>GCA\_006152115  
AVIKPVIAMVYAPVLMIRQSQVATVSGAGSPSLRSKTVYAKSGLQRKSVTKRVRAPLYY-  
GVIKSGKLVQLVSISVDHRAVCTVAKVVEQEVVHGMVALDAVKKKIALEAMSGMTSEDPAKVVDY  
ALELDLKRVRTEDRADLLPILLGLTVSIRFDPHQPLVYDLPVPVALEVL-  
GIMAQKGTMEVDDCALSTAVSDVDPIAYVSPIDLARVSGARMEFIIQDAAIDAIDEIALDELALESSVL  
IVGISPLLLPV-FGEAGGTAMSFRNRSRDLETIVDLAVAALAATRARIALAIASAM-  
FTRTQAAALAEKRSTAEIRIVKRMARALGLADNPPELLLEDAAEGNSAWAGQIYDDDISGSSESDSA  
GNIVFAANERQSFKRSITFLRKVEISDNAEAPLMRGVKNNAKSRSARKLNDKIAELNFPNVPGGIAIRA  
EAGKSEDALLHDADEGEEILLVVRWKTWKTALVLLLVVRAGDVVGVTIGGIAAVGRPDLNLRH  
HKLNGSLIEQKRVIDKLTLLRLRAALKQKLGQEVIILVVRVQGDVLAETIQIG--  
DIGAVVAIQGETIFVRRHKQTLVTDSTVEVLRGVAQGPADAAALLRIRVSHTLVEITVLLIPE-  
PVLVEAVSIREGVGKALQIVQLDVYLLRDMGTGEPTLAMSKSRELIREILALDPITGVRLAYGNLKERQG  
REMTLKDLE----LALAA-  
VTEPRMEDLPDGVVRTLIEAGPRAAVGMLFILLDPAGRVYQIDGELREGPKTVKALLGLLDTARPRVLS  
AGYGTERLRIRFADAMVLISEANLYAYKEERKELLMVPSYIVLAAERRQLVILALSLLGGHRRRAIAAIGV  
MIAAAIMESQAVEGAVHHAEPVVLDAAEIVGSEMMISRQAALDLKQILKMDVIVVFPDFQEKMVVS

LRFFCTEVAIFVIALITTVGQMLSRSPDHAQEEGAGYTRRIRAHALLFALSAVLERRNAKL DATPTLFLEL  
GLAPLRYGVLYTQQPKRKQMPSEPDSKVDGFELVHAVKADTRDNHRLELREAMALAVE-  
DSPINLSAGVLALSGTMAALVRVDSKRKMMAVAVARWTISPVLDDLALAGAATVRCLG-  
VEQADVSAALPAKALWFLFLPGASNKELEEQLRDGAGASGIDAAEDKQNAILIVRPVVVVIQDSNTA  
ALIANGGVGEWGTMSYKKHYAFAARMRLHMRTIDGVELGTSLEPTKQKAEEKIKTVKLEGDTRFRQLA  
VAGIREQMP-LHALNPDAFV-LAVLVTPAVGRVAAEDLLGGRVPCSASL-  
RELQKSQTGDALPISAVRVTGLRAKRAFIDEDVMVAGKIAA-  
LLVILATETVAALVLMNDSEATLPWRLSVAERIEADTKRAGGYAARPFPSKPSLCNTQAHAKASEPIKEI  
AAGYVAKPDRFVFPVEGIPIQLILSHPHSRVGSAKRSGEGLHEMAKELRARAVLLCRGSPGSTEGM  
ARIVTTGQPADLLQEDCLDVVIDLRMSIV-----  
IQLNSV--  
VLVPSVREVVKYKIMAAASPSGLIDVERVDDRTGAERTRMWMYGAMEDLWLLSIRWADWIRRAPIG  
AIVLHVYAQQINRAFSRLRLQLLGGWPQEAARWWNTWQLWLNKDGFFGYDAAFRA-  
RQVLKAELYDYEMSDIEGVGRYQSRQELRVGYRIRQEVEFVRLDPRTDILLQSKTRLSVIRHALTIVAILI  
VQQVWSEFS-  
VVAMEDVAVGHVECVLADRFDTAKNADIGPPGLRDPAPVLGDGTIMQAALLGKVDWETTAADFR  
YLLTLDGGRRRLGVQWVA--NMLYARIWVPPAAAALKDLLPICFFLGHPDLDLEAWEHLFE-  
ISKARASRLMAGALIEDILEKIAAFADPEATTHQSKKAKHFKTYGEEVDPVHLAYILELFALVATEVTVSD  
RLKDRTVLQMRIFRGFTSLWWISLQLGNKGPAATVITVGSAGLGALVLFILL-  
RASPLVETLFWRYVY--MRGYQAAKDVAADADPEHFLVLASVTRDVEWVEVIPAFFYFYFTAK-  
FEPFATALAREFFALFQERL---  
DVLAVPPERVERLREFVALAGTLPTSADALPGVIACALCEPNAAQVLEQAQDWNLHRAMGISLAFFD  
ARESVKGWFDKGLHKPVAATGLSEAGALTTPFRAAVDARGCAPALHRVLDLGELEQALLELASAVLV  
ADEEQTLADKPTRDRAVKAVGGVILAGTMNMGASLEQLERGSNIIIELEENYHAVNGKKGNKLT  
DKVLMVLSAAYLPVVARFSSANALDRGAFGLLIDAPDDADNLDHGGEM-----  
-----  
PDLYSFISMIIEMALAIMRTAEALADYHVLEKGRPSDFKIILIRGLHVRTLIGITIIIVGSAGRDEV TAYI  
RG-AVPIGLRRKTLPAFAPSSCFVIDIFSTMLRPPERSAVQMLILETVAEL-  
LDVTRPENDKLEKLLLLLPGLDIARLMVMVAAAEDFPGIVTISHAITAILSVA AEAVVRELLLTAEIAITA  
LALALALLMLTPDAGLVQREVGREAQLKELIQGGSVLQVSAADAMVLAATADKVRLD TDDGTTSF  
ASLNLATVSDGFYVLSSAVLQLSSDVMIVNVAKVLADKEFKNALVVRHPEQVKTOPTYAEGSPGM  
VLQTLTQSVPLAVKPETVELLWTLVAALWRVKSHLAEARPHGERALILILAVALIVLLQSEGGG--  
MG-  
MGAQARLIGAFSVLTIKAKAGEEVRKVARRVLDLTSRLGKPEEAVNPEFRGADLEQTKFEAANVEVDC  
LETIRRFVDIPFLVSIRTQHNESED RGARMVLDVTRTRFIDL-  
VTKKSEIILAA RVETDGVIA REMQKDLQALHTEATALGKVAM LQHYISLNDAHISNYVTAQIHSVLGM  
LLLVLFINQTRVGKVVWPTRRVETMVLVLAALAVFFLVIGL--  
QIVFMLSISYNQLTTLVLGEGIMAVRQSSTFPAES-  
IGILQNTFADLIAAGRVAKADIEASLHIVVGARVARGTWYVIYLYEISQAQGPSGILQRAFRQATLSQSL  
IDGRMEVKIKVVTSDRYA-  
TYEVKGGQHRKGT KYNRVKIAHNIPVAIQTRLKLAFGDPNLVLVKTFGAVVQKRYAQPLTHIRHGAVT  
IGPMEVSSPYITSKKARHAPGDSIVEIRPDNIVRSVAVVPELIWARENEDNNAVHDKYTKPTHKLA AKR  
RKAVDKAQYDRRDQVALSFIGLAVKVLPEKAIV-  
ATAGTLLPTESVAVTEGIGIAATIRIDPMEKSIIAYIKRMRPQLNLAGKADKRIVKCLNNNLD DVEWGK

LGRRRIKPLTIKSVYDVPREATELVKLMPYKDDVEGRKSQFAEK--  
AIFEPLKAFMMVFGFIARSIYALSLRVVRRITILLAKCKIVVAADTVLSAIKIIGVTIRLRHKTNIADTDHHIK  
TIEKRARLSLAGVGQVKLNLRPGKVGKAGRIKGYMPYKNYNIFDGLSSGRRSSVAALAKLRVDKEIE  
VNGIRVKQQGGRQPKADLSNALANTRVEVDIVGETIQEESNPRANAEMGQVFAAIDARVYHLVGALI  
GHALAAVLAVVTIWGIGKTYSLLAFAFRINAGIEMHSAA-VERAVAAA-----  
-----  
LKKTKKDAYMRLTCFSGKGDRIRIIEASQTQAYEIVATRTAERHGIHAKGTYGKERALMQIVPTKPVKV  
WVPIFVPEDELLAPVRAFAETNGDGVTVVKLTDDIKITPFKAVASLAVTGKSTSVLYTVLEKVTELMKDI  
IYEQRAKAHYGRGRLRSHVVTHTKTKRHLSMMRRTVVADPRMDAARLTDGEVSVITGATMAFVMSE  
QDAV--  
GEVDFHFHKEPQNEAALGIGGPQTFLATEQPRVLALLFLREYLLHIVEIDSVGNVADAATIIDILRAMQ  
AKLDRKLSADIAKVRMCLHDNVPQMGVTEVAPRRETAGDEILSAYWINGVPANADIILLVANLEIATV  
PENIDCAIRLFYQIRITLQAKERGGDTSVAVVKAQNQIAEAEGVVIYSLKATRPGTLQMKLIVEAISKSIVK  
SLAVQLFQVTLFINDTWIGTLLRAAADVVYLSAEEGREAVDHHVERDSAVEVAPQKDIVARKIRIFTPA  
APSAVVIWDPAIEREDKAEAQGTILKIYGNLQDISCFTDIGAEPKIESLSWDEKEYVVRDDIPPDID  
VLVGKSSRVNKEFGIPDVAVCAPSKPGVTESIDRGDPKAGSCGEVANLPYPQEALLNAVSSANVQKNI  
SMVLGGHPVGEMGISRDVERHLETNMCEIFVDKPDVTVALDFYVIQLT-  
LRVGLDPPNTRVEIDGKEGRKLMAVLGDGEAELQRHPKVSVAVGIM-  
TAGSKAKLPPDALIQDGV LHGDVGFTVLDIPQGRV-  
VTSVTLKVKAQLKIDKVLVKTfHVVTLSFSNNKGEEHLIKRLQALKKSTRHYEMLLKIRETECAESPHAI  
DVGKILKIDALLQTICVAHYTEIEPLLADGLAALGVLGEQGLLHVVPRLMILAVLHLWHLEADLSVRW  
WMQQRAIVTDQTLGLDSRDRDWSF-AVSEVVGNTFFAKTAEDDTVQRLRARNPI-ILL-  
CGKAEMV-  
ISPSGLRLSSTPPTMEEGNTSRVILSQERLQDAMEYYVLKVLLVFVDQIILAFGSGDEPLRFLVADQAV  
TGRENPGMVTLTRRTFPLDVQRDATFVLVFADSTMKNLSHRKMHMNLVLVKTGWWVNVSTKILIS  
DQAIASIAEDAGAHTQPSSESALAVITSRVIPIVLVISQKPTAPSKSLFDALALYDAITTDVQEGPKRYF  
IFEGDLVSVLGGIDAAVLRALQRPQPERMRRRAVIAGAIRLAIIRASGVLVQLEAGVLNFAVAVTFAA-  
AHHATEALLFAAID-PALAFRVRAHSVSTKRDPYKAHNKFLHKAEVDKRLVAEGVDTLA  
>GCA\_006363825  
AVIKPFLYTKYAPVLMIRQQQVATVSGAGSPSLRAKTVYAKSGLQRKTLTKWVAKPFYY-  
GVLKMANVVQLVSVISVDNRTVCTVAQLVEQEVVVHGLVALDAVKKKIALEEIDGMTSEDPKVVVYE  
DELELKRFRDADDRADMLPVLLGLTLKIFDPHQPVVHDLPIPTVYEVV-  
GVMAQKGTIEVYDCAISTAISDVDPYAVVSPIDLDAVAGEKMAYIDQENAVSTVKQEIALEELALESGVL  
VVGI-PLLIPV-FADEG-T-MSFANRSRSLATIVNLAVSHPQLTRA-IEQ-MIADM-  
MREAQAAALADRRGTAEIIRIVKRMQRSAGLADDPDLVMELEAAEGNAQWAGQIYDDPISGSES  
DSAGNIVHAANKRQNNARSITQLRKVEISDKASAPLMRGVKHNSKRSARKIDDAIAGLNFANVPEGI  
AIQADAKEPQDLLLLHDADEGEELLIVRWHTVWKTAVFIALALRAGDLVGLISLGGIAAVGRPDGILNR  
HHKLNGSLIEQKRVMDKLTLLRLASLKQKLGAEENVILVVKVAGDIVADATVQM---  
SVGAVVAIQGETIFVRRHRQTLVTDSEATVEILRGVAEGPADAQALLRIRVEHTLVKMSVLLIPE-  
PVLVESVTIREGVGKALQIIQLDVYLLRDMGTGEETLAKSKS-----  
TDPITGVQLAYGNIKERLGKDTNLKDLETMLE-  
LVITGDVTEPRMANYPMGVYRTLIEAGPRAAVGMLFLLLEAGRLYSISGDLRELTKSIKSLIGIVDAAVP  
KVL SAVYGTARLKIRYADVTVLTSDAELYAYAEERREILRMVPVYITTAARRQLIIFALS LKGGHRRARA  
ALGVLLPAVIRESQTEQGEVNHAAPAILLDAAEVVGSEMMITRQSALDLKQVHKVDVIVVFPEFQEK

MVVSLKFFCTEVAVFVIALIVTVGEMLSREP NHAQEGGAGYQKRIRGHSILFALVCTFDRRNARCD-V-  
GLFLGLALAPPRYGLLYTQQPKKKQMPSEEDDEKVDGFELIHVVKEDATN-  
HELEMPEAMALAVEADTSINVSAGVLALDGGMAAVERIDSKRKMALAATKWTISTAALLDLRLSGAA  
PMRALG-AEMADLTAALPKKDI--  
LFLPRANNAELEEELDGAGASSADAAEDRQSAILLVYPVLVVIQDSNTAGLITNEGVEEWGTMAYKK  
HYAFAARMRLHMRTID-----QMEPNKQKSEKVKTVKLEGDTRFRQLAVEGVKEQMP-  
LHALNPDFAVLVALLVSPAVGLVAANQDLAGAGVPCGASL-  
RELQKSQKGDALPISAVRLLGMAAARAMIDEDIMVAGKIAA-  
LFKIGALRTVIEIVLRNDSEATLPWRLSVAERLEADTRRGGGFAARPFKSKPSLCNVQAHANVADPIQEI  
AAGYVATEEKFVFPVEGIPIQLILANTHSRVEGAKRAEEGHLHEMAKELIAKAVLMLKSEPDTNTEGML  
DYITTGQPTDLLFKDCLDIIDLRMNII-----  
VHLNTI-  
HVVVPGVRDVADFEIMAAANAPSGLVQVERVDERTGRERTMMWMYGAMEELWLMSVTYADWVV  
DVPIGAIVLHVYAQTLNRAYSLTRLQLAGWPKEAESWWNTWQLWLNKDGGFFGYTAAFRAVKAILKA  
DLYDYELRDTEGVGRMQSRQELRVGYRIRQEVSFARLSPRTDILLQSQTRLMLRHAEVVAAILMRDI  
VAEFT-  
VVAEEDVAMGHVECVLADSFDTAKNAHIGPVGLRTPENVLGDGTVFKEAVLGKVD FENTVADFRY  
RVLTDGGRRLGVEW----NMLYARIWLPPAAAALKALQPISFFLGQPDLDLELW-  
LLFAGISKARADKLMAGALVEEILSGVARFAAPEATTHQSHKTKHFKYYGEEVDPVYLAYILDLFALVAT  
QVTVSDRLLKDRYVLNLRIFRGLTLLLLAAQLGEKGPSATVITVDTIMGLGALVLFILL-  
RDLVLLETLYRYVYV-MKGYEAAKD VADADPEHLLPLASVTRDVEWIEIVPAFFYYFKTAG-  
FEPFNTAVAKEFFGLFEERLRIVDLAVPPDRVEALVEFVALAGTLVTSADALEGVIACGFCEPNAAEVL  
ETDQDWNLHRHMGITLAFYKAQESVKS WFDKGLHKDVAETGLREAGFTQPFRAEVQARKCVPVA  
HRVVDLGDIEAALIEIDSAVTVADEEQTLADQPTTREKAVGAIGGVVLAGTMNMGANLEQVERGNNI  
IIELEEDYRAVNGRKD-  
QKMTDKVLMVLSAALFPVMARTVSANALDRGVFDLLIDVPDDADNLDHGRDLTIPAA TVHLETTPLY  
AESEIERIAWIAPMHLLGTLDAVLGFEPDQYSFMSMMIDASLEITETSEVLDEYHVLEKGSRPPEFRVILI  
KGLHIRVLAGIATIIVVGSAGRAEVTAYIEG-  
AVPITLNKHTYLPAPAPSSCVTIDIFSTLLRPPERSVQMLILETV AEL-  
LEVTRIENDKLERLDLLLPGLDIAALLTLEAAAKDFASIVTIAEAI VAILSVA AEAVVLREMLLT LAEIAVTAL  
ALALALLMLTPDRGLHQKEFAREAQMKELIQGGAVLQVRAAEDMVLAATADKVRLETDEGTTSFA  
SLNLATVSDGFYVLSSAVLQLSSDLMMVVGVARVLADKETKNALVVRHPEQVKTQPTYAEGSPGMV  
LQTLTQSIPPLAVK PQVEVLLWTLVAALWRVKAHIASARPRIERILVLLALT LIVVLMQSEGGGIGGG  
-  
MGSAAKGLAAFSILTIKASVGDEV RKVTRRVMDLNSRLGRPEEAVNPEFKGAELDQSKYEAA NVEVDT  
LETIRRFVDIPFLVSTRTQHNESEDRGARMVLDVTRVRFIDL-  
VTKRSEIILAARAETDGIISREM QKDLQALHPEAAALGKIAMLQH FISLNDGHISNYVTADIH SVLGMLL  
LVLFISEVRVGKVTWPTTRREVTMV FLLATFAVFFLVIGL--  
QLVFMLSGISYQQLTTLVLGEGVMAVRQTSTFPADS-  
IGILQNTYADLICAGRVT KADIEKSLHIVVGARVARGTWYVIYHYEITQAQGEAGIMQRAFRQATLSQS  
LIDGRMEVKIKVVTSDRYA-  
TYEIKGGQHRKGTKFN RVKVGHNIPVQVLPRLKMAFGPPHLILVKTFGAVVQKRFAQPLTHMRHGAV  
TIGPMEVASPYIVAKKARHAPGDSVVDLKP DN VRSVAVVPELIWARENEDQGAVH DRYVKTTHKLS  
AKRTKAVDKAQYDHKNQVHLSFIGLAVKVLPEKAIVHATSGTLLPTEAVAVTEGLKGVA AQIRLDPME

KALIAYIKMRPQLNLGGKTDKRIVKCLNNNLD DVEYGKLGRRRIKPITIKSVYDVEHELATELVKLLPYK  
DDVEGRLSQFALK--  
AIFEPLRAFMMLFNYIARCIYALSLRVVVRTIVLVKTRIVVNADTVLSAIIIGVSIRLRHKSTNVADTNHYI  
KTIEDRARMTLAGAGKVKLNLRPGRVGGKGGRIKGYMPYKNYNIFDGLSGRRRAKV KALAKIKKVDKE  
VNV DGV RQKQQGGRTPKADLSNAV-  
NTRVDVDIVGENEQDESNPRANAEMGQIFAAIDARVYHLVAALIGHALEAILAVAAIWGIGKAHALL  
AVRLKINAGIEFHSA-VDQAVAAA-  
HAQPAGEASALADVSEYPGVALLVTDASLDVCRLRRRQSELKKTKEAYMKLTCFSGKGDRVKIVEA  
SQTQAYEIVATRTAERHGIHAKGTYGKERAMMQILPTKPVKVVVPVFN EALLAPIRAFAETNGDG  
VEVVKLQNDIKITMFEKAVASIAVAGKATSIVYTVLEKVTELMKDIIYEQRAKAHYGRGRLRSHVVTHTK  
QKRHLSMMRRTVVADPRMDAARLVDGEVSVITGATMAFVMSEQDAV-  
PADVDLHFHEEPAREADLGIAGPETFLATEQPKVLVLLFLRDYLIHIVEIDTVGGFSDAATIYDILRPLQN  
KLDRKLSADIAKVRMVLHDDMADMGV TMEAPRREAAGDPILSAYWINGVPANSDIILLVANLEVATV  
PENIDCAIRLFYQRVTLQAKERDGDVSVALVPAQNQIEAAEGTVIYTIKGKTPGTVQMKNLVESISRSIV  
KSFAVQLFQVDTFLDDTWIATLLRVAGDVVFVDAREGKEAVDHSVVERDTELELAPQKDIVARKIRIYTP  
AAPS AVVIWDPAIEREDKADAQG TILKIYGP NLQDIACFTDIGAEPKIESLKAWDEKEYVVRDDIPED  
I-  
VLVGKSSKVNKEFGIPDVQVVAPSKPGVTESIDRGEPKAGTCGEVANMAYPQESIVNSVSSANVQKNI  
SMVLGGHPVGEMGISREIERHLETNMCEIFVDKPDVDVALDFYRLSLTPLRVGLDPPNAKVEIDGKESR  
KLMAVIDGDARLQRHPKVSGALGTG-GGGTKARLPDDTLIHDGVHHDGDIKFTATDLPPGRV-  
VTPVLNDVKQQLKIDKILKTFHVVTLSFSNDKADEHLIKLRLNALKKNTRHYEMMLKIRETECAESPH  
AIPVGKILKIDLLLQTICVAHYTAIEPLLADDLTALGVTGDQGILHVVPRLMIMAVMHLWGLEAAMELP  
RW-LMARSLVTDLGMGLAIRERHFTY-TISEVVGNTFFAMTANDDTEERLHARNPI-VLL-  
WGKFAMT-  
ISPSGLKLASTPESSLQHGNENDLILSPERLTDEMAYYVLRILLVFVDEILAYGSGSEPLRFLVAEQAVTG  
RDNPGVLCLTRRTFPLDLQRDATFVLVFADSTMKNLSHKMKMHMNLV IIKSGWIVNVSTKILISDQAIA  
SFAEDAGAHTQPS ESALAAITSRVIAPIVLVVSQKPTAPSKTLFLEALNLYDDINATVMNPPKKYIFEG  
DVVSVLDTVDAAVLKG VQRQPDRMRRAVIAAAIRLAIAGL ASPFRVLD-GGINFARAIDFAA--H-  
-----GFRVRNHKTSTKRDRPYKGHTKFLHKA ELEKSLIAQGVDTIA  
>GCA\_008124775  
AVIKPVTMDKYAPVLMIRQTEVATVSGAGSPSLRAKTVYAKSGLQRKTSTKWVAKPLYF-  
GVLQMGKIVQLVSISVDNRSVCTVAQVVEQEVVHGLVALDVVKRKIALEAIQGMTAEDPAKVMDY  
PEEVELKKFRDADDRADMLPVMLGLTSLKFDPPHEPVVHDLAVPVIYEVLGNIMADKGGIEVDDLSIN  
TALGDVDPIEYVSPIDIEAVAGDKVAYIDQEA AVAAAKEEIALEELAESSVLVVGI-PLLLPV-  
FGEEGGT-MSFANRSRKLESIVDLAVAYADLPRSRIQ-DIAAEM-  
MGRMRAAALAEKRGTAEEIRIVKRMQRAAGLADNP ELVMKEDAAEGHSSWAGQIYDDPISGSSES  
SAGNIVFAANKRQN FARSITYLRKVEISDKAAAPLMRGVKHNAKSRSSRKLDD DIAALNFPNVPEGIAI  
RAEAGKPVDTLLHDAAEGEEILMIIRLKVTWKTAVAIMLTLVAGDVVGLIELGGIAAVGKPDGLLN RH  
HKMNGLSLIEQRPIIEKLT LRLRASLKQKLGAEKVIIFVVKVQGDVVAEAKIQM---  
TLGTVVAIQGELIFVRRHRQTLITDSESTV-ILRGVAEGPADARALLRIRVSH TLVQLSVLLIPD-  
PVLVESVTIREGVGKALQIIQLDVYLLRDMGTGEDTLAESQSRELIRDVLMIDPITGVRLAYGKIKERFGK  
VTNLKDLETLF--  
RFIITSVTEPRMDNLPDGVHRNLVEAGPRAIVGTFLILDDAGKLYDIDGDMRELTKTIKATIGLVDAKA  
PKVLSAAYLTKRLKIRFADVEVLVAEADLYAYKEERKELLRMVPVYVIVA AKKRQLVIFALSLRRGHRR

RAALAVLIAAAILESQAERGAVNHADPAVLLDDAEIVKSAMMISRQASLDLKEIHKVDVIVVFPEFQEK  
MVVSLRFFCTEVAIFVIALIVTVGQMLSREPESAQEDGAGYNKRIRAHSMFLALAVTFDRRNCRNA-  
TPTFLGLGLAPPRYGI-YVNQPKKKNMPTPDDDDRVDFELVNAIKEDTTSNHELDFPEAMALAVE-  
DAPINVTGGVLAMTGGMAAIERIESKRKLSLAAT-----

--

LYLPGASNEEEESNLDGAGNSTADVAEDRQREILLIHPVLVVIQDSNAAGLVSNGGVDEWGT MAYK  
KHYAFAARMRLHMRITDAIEVGVELEPNKQKA EKVKTVKLEGDTRFRQLAVEGVKEQMP-  
LHALNPDFAVLPVLPVTPAVGRVAADTDVLGASVPCPFSL-

NELQKSQKGAALPIAGVRLLDMRAARGMIEEDIMVAGKVAASLYKIGALDTILELVLRNDTEATRPWR  
LSVAERLEADTARSGGYAARPFATKPSLCNVQAHATTAEP IQEIAVGYVAKEERFVYPVEGIAIQLILAG  
PHSRVDLAKRAGEGHLHEMAKELFARAVLMVRNEPGTNTGMLRYMTTNQPTDLLFEECLDVVIDL  
RRMTVV-----VQLNTV-

HVVVAGTSDVGDYSIMSANFPSGLVQVERVDDRTGRERTKMWMYGAMEELWLMSVRWADWV  
DCAIGAILHVYAQTLNRAFSYERLQIDGWPKESRWNTWQLWLNTDGGFGYDGAFRVAAAILKQ  
DLADYDLSDVEGVGRYQSKQELRVGYRIEEVGSRLDPRTDILLQAKTRLSVIRHALDVVAILVLRDVV  
GEFT-

VVAKEDVAMGHVECVLADRFSTAKNAHIGPTGLRTPAPIFGDGTVFKEAVLGKIDLANTVADFRYLV  
VDGGRELGVVWVSMRNMPLYPRIWLPPADAALKNLEPIKFFLGHP EVNL----SKYA-

ISKARADKLMAGALIEEILDNVARFAAPEATTHQSKKAKHFKYYGEEVDPVHLAYILNVFALVATQVVV  
SDRLKLDRYVLNMKI-RGVTSLLLLSLNLSEKGPAATAITVGTVAGLGALVLFILL-

RDSVLLETLYHRYVYV-MRGYTAAKDVADA-PEHFLSLAALS RDVEYIEIIPAFFYYFKTAG-

FEPFNTAVAKEFFGLFQERLKVIDVLVPPDRVEALIVFVALAGTLATSAEAMVGIIACGLCEPNAAA  
VLETDQDFNLHRAMGITLAFYEARES VKGWFDKGLHKVVA AVSLKDAGAFSTPNLCEVTAKVCVPAIHR  
VLDLGAIEAALIEIDS AVVVADEEQLADRP TTRDKAVGCVGGVVL AGTMNMGGALEQVERSNNIIIE  
LEEEQYSAVNGKKAAGKLT DGVLMLVLSQAYFPVLAAPASANALDKGVLDVLIDAPDDADNL DHGRE  
MAIPAPSIHAETHPLYAEDEIDKIAWIAPMHLLGTLPAVLGFEPDQYSFISMMIEASLQITKTAEALDDY  
HVLEKGARPPGFKVILIKGLHIRLLAAVG TILVVG SAGRDEITAYIEGRAVPITLRKNTFLPAFAPSSCTV  
DILSTLLRPPERSTVQMLILETVAEL-

LEVTRIENGKLEKLQALLPGLDMAELLAILAAEDFSAIVTIAAAIAAILSVA AEAVVLR ELLLTAEIAIT  
ALALALLMLTRDSGLAQRERARDAQLKELIQGGAVLQLRVQEAMVLAATADKVR LSTDEGTTSAFA  
SLNLATVSDGFYVMSSAVMQMNAQLMMVTVARVLADKESKNALVVRHPEQVKTQPTYAEGSPG  
MVLQTLTACVPPLAVKSEEVELLWTLVAALWRVKAHLAQATRPLEERLLILLALLSLIVVLLQSEGGGM  
GGG-

VSSAAKILGAFSLLTIKASVGDEV RKVTRRVM DLNSRLGRPEEAVTPEFRGAELQSKYE AENVEVDCV  
ETVRRFVDIPFLVSIRTQHNESED RGARLVLDVTRVRFIDL-

VTKRSHVILVESVETDGIAREMAKDLQALHP ELAALGKIAALDHFISLSDGHISNYVTAGINSVLGMLLL  
ILFIQQVRVSKVTWPTTRREVS MVIALTALAVFFLVIGL--

KIVFMLGGISWQQITTLVLGEGVMAVRQTNTFPADS-

ITILQNTY AELICAGRVT KADIEKSLHIVVAARVSRGTWLVIYLYEITQAQGEEGIFQRAFRQATLSQSLY  
DGRMEVKIKVSSDRYA-

TYEIKGGQHRKGRFNRVKIAHNIPVEVLPR LKMAFGDPNLILVKTFGAVVQKRFASPLTHIRHGAVTI  
GPMEVASPYITSKKARHAPGDSAVGVKPDNIVRSVAVVPELIWARENEDNGAVHD RYVKTTHKLA AK  
RTTAVDKAQYDKRNQVHLSFIGLAVKVL PDKAI VHATAGTLLPTEAVSVTEGLKGVAATIRLDPMEKA  
LIAYIKRMRPQLNLAGKADKKIVKCLNNNLLDDVEFGKLGRRRRIKPLTIKSVYDVEHEKATELVKLIPYKD

DVEGRKSKFADK--  
ALFEPLQTFMMLFGFIARAVFALSLRVRRRTILLAKTRIVVNANTVLSAIKVIGVSIRLRHKSTNVADTKH  
FIKTIIEERARMTLAGAPSVKLNLRPGRVGKKGGRIKGYMPYKNFNIFDKLEAGRRRAKVKEAKLKKVDKE  
ITVDGIRTRQQGGRLPKADLSNALANTRVGVDIVGENIQEESNPRANAEMGQIFAAIDARVYHLVGA  
LTGHALA AVLALCAIYGIGRAHALLAVKLNAGIEFHSA-VEAAVAAA-YAQLAGEAG--  
ADVGEAYLGDLAVTDDSLDTANRPSRSISELKKTKEAYLSLTCFSGKGKIKILDASQTQAYEVVATRT  
AERHGIAKAGTYGKERAMMQIVPSKPVKVVVPVFSDEELLAPIRAFAESNGDGEVVKLT KDVKVT  
MFEKAVASLAVAGKSTSIVYTVLEKVTLSKDIIYEQRAKAHYGRGRLRSHVVTTKQKRHLSMIKRTVV  
AHPRMDASRLTDGEVTITGATMAFVMSEQDAV--  
GDVDLHFHEEPRREAALGIAGPETFLTTEQPRVLALLFLREYLIHIVDVGTKNGFADAATIFDILRAMSN  
KLDRKLSAEIAKTRMVLHDDVKMGVKAESPRRDKAGDAIL SAYWINGVPANADIILLVANMECATA  
PENINCAVRLFYQRITLQAKERDGDVSVRLIPAQNQIEAAEGTEIYTIKGNP GTAQMKLNVEAISRSIV  
KSLAVQLFQVDFIDDTWIATLLRAALDVVFEAKEGHEAVDHVIERDTELELAPQKDIVARKIRIYTPA  
APSAVVIWDPAIDREEKADAQGTILKIYGPDLQDIACFTDIGAEPKIESLKAWDEKEKYVVRDDIPEDI  
TTMVGKSSRVNKEFGIPDVAVCAPAKPGVTESIDRGEPKAGSCGEVANLPYPQESIVNRVSSANVQK  
NISMVLSGNPVGEMGISREVERHLETNMCEIFVDKDDVDVAMDFYTIKLTDLRVGMDKPNAKVQVE  
GKESRKLMAVL DGEADLQRHPKVSEEGGTRVGAGTKAKLPDDALILDGVHHGDVKFTNTDLPEGRV  
-  
VTPVVLAVKAQLKIDKVLVKTFFHVVTLSFSNDKGEEHLIKRLNALKKSTRHYEMLLKIRETECAESPHAI  
PVGKILKIDELLQTICEAHYTAIEPLLADDTALGVMGDQGLLHVPRMLAVLHVWGVEAARIVAD  
WDLQMAAGITDATMGLRVRRARDWTY-AISEVVGNTFFARTKDDDTEERIHARNPI-VLL-  
YGKEGMV-  
ISPSGLHLDSTTEDTLQHGHD EHLILSAERLKDEMGYVVLKVLLVFVDEIILAWGSGEDPIKFLVAEQAV  
TGRANPSLVCLTRRTFPLDLQRDATFVLV FADSTMKNLSHRKMHMNLVLIKSGWIENVSTKILISDQ  
AIASFAEDAGAHTQPSESALAVITSRVIPIVIVLSQKPTAPSKTMFLEALNLYEEITATVLNSPKRYIIFEG  
DVISVLGRDLAAVLLGMQRPQPD RMRAVVAAAIRLAIAIKASGITQVLDAGLVNFSRAVSLAARCYG  
DLAV-HVPVIG-AAIAFRVRNHKTSTKRDRPYKGHTKFLHKEDEDKKLIAEGVDTLA  
>GCA\_014199395  
AVIKPVTMNTYAPVLMIAQSQVATVSGAGSPSLRAKTVYAKSGLQRKTESKSVALPIYY-  
GVVKVSNIVQLVSISVDSRAVCTVAQLVEQEVVVRGMVALDVVKKKIALEAIEGMTAEDPAKIMDY--  
EIEIRKFRDVEDRADLLPVMLGLTLKIRFD PHEPVVHDLAIPVVFV-  
GIMVQRGQIEIDECGVSTAISDVDP IVYVSPIDLNAVAGDKMAYIDQEGAVSAAKDEIALEELALES AV  
LVVGI-PLLIPV-FEADGDV-MSFANRSRTLT TIVNLAVGYPEVKRA-----IASAM-  
MDQSQAAAALAEKKGTAEEIRIVKRMQRSAGLADDADLVILDDAAEGNSSWAGQIYDDPLSGSSESES  
VGNIVYAANKRQNFARSITELRKVEISDQAAAPLMRGVKHNAKSRSRKIDDAIAVLNFPNVPEGIAIR  
AEQGKPADTLLHEAAEGEEILLIVRWHVTWKT AIIYLMDDAGDIKGMITLGAVGAVGRKEGILNRHH  
KMNGSLIEQKRVIEKLT LRLRAALKQRLGKDQVIIFVVKVAGDLVAAATIQM---  
NVGAVVAVQGPTIFVRRSRQTVIGDQEATVEVLKGVAEGPADAEALLRIRVDHTVVKLT VLLIPDVPVL  
VESVTIREGVGKALQIIQLDVYLLRDMGTGEETLAKSKSKEQIRSVLQVDPITGVRLAYGKL RERLVKGG  
SQKELGTL---  
LSILKNVTEPRMDNLPEGVCRTFIAAGPRAAVGMLFLILDDAGKIYTIDGDLQENNKTIKSMIGLVDA  
KPKILSAGYLTGRLKIRYADVQVLISEADLYAYAEP RNELMRMVPVYITNAAKRRQLILFALSRLGGHRR  
ARMSLNVMLAAAILESQAEQGAVNHEDPDVLLDDGEIVGSEMMISRQSSLDIKSVLKVDVIVIFPEFQ  
EKMVVSLKFFCTDVAIFVIALICTVGEMLSREP KHAQEGGAGFGKRIRKHSVLFALAATFDRTNCRDT--

PDLFAGLGLADPRYGILYTVQPKRKQMPSEPDADRTDGFELVHAIKADTTD-  
EALDMPEAMALAVEATESINVSAGVLAMSGDMTAVEKVDSKRKMAVAVEKWTISKIPVVDVNISGA  
APFRCQE-IEQADVSAGLPIKAL--  
LFLPGANNAELEEKLDGAGSSTIDAAADKQAAILLVNPVLVVIQDSATASLISNGGLEEWGTMAYKK  
HYAFAARMRLHMRTIDAIEVGVSMNPNKQKAEEKTVKLEGDTRYRQLATDGVKEQMP-  
LHALNPDAFVIGPVLVTPAVGRVAADADVLGAEVP CDFSL-  
RELQKSQKGNALPISGIRLLGMRAARAMVEEDIMVAGKVAA-  
LLVIGGLETICKLVRNDSEATLPWRLSVAERIAADTKRAGGYAARPFNSKPSLCKTQAHAKIADPIQEI  
AAGYVAVDERFVFPVEGIPIQLILANPHSRIGGAKRAGLGHLEMAKELVGKAVVMVMNEPGTNTEG  
LMNYLTGTGQPTDLLFEDCLDVVIDMRRMSV-----  
VQLNTV-  
HVVVAGVRPVGAFEIMDASADSGLVQVERVDERTGRENTLMYMYGAMEELWLNSIRYADWIIDCTI  
GAILLHVYAQAINRAFSLERLQLAGWPKEATSWWNTWQLWLNKDGFFSYDAAFRA-  
KAVLKADLYDFELKDVEGVSRLSRQEV RAGYRIREQITYEQLTPRTDILLQSSTRFSIRHAL-  
MVAILVREIVVEFT--  
VAKEDVAMGHVECVLADSFDTAKNADIGPVGLKTPDPVLGDGTVLNEAVLGKIDLANTVADFRYK  
MLIDGGRALGVQWITMQNMLYARIWIPPAPAALKNLQPIKFFLSHPNLDLQSAAVIYEKISKARAEKL  
MASALIEKILEKVARFAKPEATTHQSKKL RHFKYGEEDPVHLAYILELFALVATQVTVSDRLLKDRYVL  
NLAIFRGFTSLLWLSAQLGDKSPSATIISLDSIAGLGALVLFILL-RASVLVETLYYKYVY--  
MLGYNAAKDVADADPEHFLVLAASRDVEWIEVIPSFFYYFKTATSRLTKNTALAREFFGLFAERLRVID  
VLVVPDRVEALVEFVALAGTLVTSAEA-  
VGVIACGFCEPNAAQVLEADQDWNLHRSLGITLAFFEARES VKGYFDKGLHKAVAEIGLTEAGALTTP  
FHAAVTAKRCPAVHRVIDLGEVEAALIEIDS AVVVAD EEQTLADHP TTRDNSVGAVGGVVLATGMN  
MGANLDSVERAGNIIIELEENYGAVNGKKNDGKLT DKVVMVLSRAYFPVLERAASANALDKGAFDL  
LIDAPDDTENQD HGRTL TIPAPSIHTESAILFAESDIERIAWIAPIHLLGTLD AVLGFEPDQYSFISMMINA  
SLDIMETAEVLD DYHVLEKGS RPPGFRVVL IKGLHIRLLAGIGTII VGSAGRSEVTAYIQG-  
AVPITLNRVTF LPAFAASSCHVVDIFSTMLRPPERSAILTLILETVTEL-  
LEVTRIENDKLERMDALLPGLDVAALLPLLA AKDFAAIVTIDRAIAAILSVA AEAVVLR EMLLNLA EIAV  
TALALGLALLMLTRDQGLHQKENAREAQMKALI QGGVVLQIKATDRMMLASTADKVRLDTDEGTT  
SAFASLNLATVSDGFYVLSSAVLQLSSDLMMIVAVARVLADKETKNALVVRHPEQVKTQTTYAEGSP  
GMVLQTLTGAIPPLAIKSEEVELLWTLVAALWRVKAHLANAARPHLERILILILALSIAVLMQSEG-  
GSMGGGSGAPVKILA AFSILTVKAKAGDEV RKVARRVMDLNSRLGRPEEAVSPEFRGAELEQVKYAE  
NVAVDTMETIRRFVDIPFLVSTRTQHNESED RGS RMVLDVTRIRFIDL-  
VTKRSEIILAARAETDGVIA REMKGD LAALHPEAAALGKIAFLQHFI AVQDGHISNYVTAQIH SVLGML  
LLVLFINETRVAKVWVPSRREVTMVFIMATLAIFFLVIGLG-  
QLVFM LSGISWNQITTIVLGEGVMAVRQTSTFPADS-  
IGILQNTYADLICSGRVAKADIEKSLHIVVAGRVSRGTWYVIYHYDITQAQGPSGIMQRAFRQATLSQS  
LIDGRMEVKIKIVTSDRYA-  
TYEIKGGQHRKGTRYNRVKIGHNIAVQVLPRMKMCFGPPNLVLVKTFGAVVQKRFAQALTHTRHGA  
VTIGPMEVSSPYIKNKKARHAPGD AVVDL KPDNILRSVAVVPELIWARENEDNGAVHDKYVKTTHKL  
AAKRKKAVEKAQYDHRNQVELSFIGLAVKVLDPDKAIVHATSGTLMPTASVAVTEDMKGIAATIRLDPM  
EKSLIAYIKRMKPQLNLGGRTEKKIVKCLNNNLDDVEYGKLGRRKIPITIKSVYDVESERATELVKLMPY  
KDDVEGRKSQFAEK--  
ALFEPLKAFMMLFGYIARAIYALYLRVIRRTILLVKT KIVVNANTVLSAVKIIGVSIRLRHKSTNVAETNHFI



KTIEKRAKMTLAGTGKVKLNLSPGRVGKKGGRIKGFMPYNNYNIFDGLASGRRAKVKELAKLSVDKTI  
SVDGIRTKQQGGKIAKAQLSNAIANTRVGVDIVGEEVQEESENPRANAEMGQIFAKIDARVFHHVGALI  
GHVLMVLAIVSIWIGIGRAHNLLAVAFRVNAGIEMHSAA-VDAAVAAA-FAEPGGEA-  
VIADVSEGLDALLISEMSVDVCRLRRRSLGELKTKKDAYMSLTCFSGGKGDKVKIVEATQTQAYEIVA  
TRTAERHGIRAKGSFGKERAMMQITPTKPKIWWVPVVFVSEAELLAPIRAFAETQGDGVTVVKLTDDVKV  
TMFEKAVASLAVSGKATTLIYTVLEKVTQLMKDIYTQRAKAHYGRGRLRSHVVTHTKQKRHLMMKR  
TVVADPSMDAARLTDGEVAVITGATMAFVMSEQDAV--  
GDVDFHFHEEPQREAELGIGGPETFLCTEQPRVLALLFLRAYLLHIEIETSNNFSDAATIYDVLAMVVK  
LDRKLSADIAKTRMCLTDNLLDMGVTDVAARRNAAGDKILSAFWINGVTANADIVLLVANLECPCVP  
ENIDCAVRLFYQRITLQAKERGGDVSVQVPAKNQIEAAEGTVIYSIKGKTPGTGQMKTIEGIRSIVK  
SLAVQLFQVNTFLDDTWIGTLRAALDVVFVQAEESKEAVDHVIERDTEFEFAPQKDIVSRKIRIYTPAA  
PSAVVIWDPADREDKADAQGTLKIYGNLQDINCFDIGAEPKIESLKAWDEKEYVVRDDIPDDI  
DTLVGKSSKVNKEFAIPDVAVCAPSKPGVTESIDRGEPAKAGTCGEVANMSYPQESLVNAVSSANVQK  
NISMVLAGHPVGEMGISREIERHLETNMCEIFVDKADVDVALDFSVIGLTALRVGLDTPNARVEIDGKE  
SRKLMAVLDGEAALQRHPKVSAAATGLT-KAGTKARMEDDALIIDGVIHGDIPFTATDLPDGRV-  
VTPVVNVKKAQLEIDKVLRTFHVVTLSFSNDKGEDHLIKRLNALKKSTRHYEMLLKIRETECAESPHAI  
SVGKVLKIDKLLQTICEAHYKAIEPLMADDLTALGVMGEQGLLHVPRMLAILLLWGVEALQLVPV  
WDLQEQAIVTDQTMGL-ARDRWSY-AISEVVSNTFFARTADDDTEQRIHARNPV-VLL-  
YGKFGMV-  
ISPSGLKLKSTAATDQDRGNDEDLILSTERLQDEMGGYVLRILLVFDQVILAYGSGDKPIKFLVANQA  
VTGRQNPGMVSLTRRTFPLELQRDATFIMVFDDSIMKNLSHKKMHMNLVLVSKSGWVVNVSTKILIS  
DQAIASAYEDAGAHTQPSESALAIITSRVMAPIVLVVSQKPTAPSKTLFLEALALYDEVTATVLNPKPKY  
YIFEGDVSVLKSLLDAVLLGMQRPQPDRMRRAIVATAIRLAIALRAADIVVRLDNNLINFSAVTLAV  
RVYIILSDIIMIAY-----AFRVRNHDVSTKRSRPYKAHPKFLHKAIEIDKSIAEGVDTIA  
>GCA\_018263905  
AVIKPVTMGVYAPVLMIAQSQVATVSGAGSPSLRAKTVYAKSGLQRKVETKWVAKDFYY-  
GVVKMANLVQLVLSISVDNRAVCTVAQLVEQEVVHGMVALEAVKKKIALEAIEGMTAEDPAKVVDY  
QTRIAIRKWRDADDRADLLPVLLGLTLKIKFDPHQPLVHDLPIPIYEV-  
GIMAQKGTIEVDDCGISTAVSDVDPIAYVSPIDLAAISGQKMDYIDQDTAVSAAKQDIDLEELALES  
LVVGIRPLIPI-FRDDADT-MSFANRSRTLKTIVDLAVSYPDQTRAR---AIAAAM-  
MDASQAAAAAEKRGTAEEIRIVKRMQRSAGLADDPELVLEDAEAGNSNWAGQIYDDPISGSSES  
AGNIVFAANKRQNFARSITFLRQVEISDQAAAPLMRGVKHNAKSRSSRLDDVIAALNFPNVPEGIAI  
KAAAAKPAETLLHDADEGERILMLIVRWHVTWKTAAIYLLDLAGDIVGLIELGGIAAVGRKDGLLN  
HKLNGSLIEQKRVIDKLTLLRLRAALKQKLGADQVILVVRVQGDLVAEAEIQMG--  
DVGAVVAIQGPTIFVRRHRQTVIGDQEATV-VLKGVAEGPADAQALLRIRVDHTLVKLSVLLIPE-  
PVLVESVTIREGVGRALQIIQLDVYLLRDMGTGEETLAKSRSRELIRELLQIDPITGVRLAYGGLRERES  
KALSIKIDTLFE-  
LAILAGVTEPRMQNLPEGVCRTFIRAGPDAAAGMLFLILDDAGKIYTIDGDLREITKSIKSLIGLVDA  
KVL SAVYMTDRLKIRYADVHVLTSDADLYAYAEARRELLRMVPVYITNAAKRRQLVLLALSRLDGH  
RRVRMAIDVMIAAAIIESQADNGAVHHAEPRIILDDAEVVGSEMMITRQAALAMKEVVKVDVIVIFEE  
FEQEKMVVSLRFFCTDVAIFVIALICTVGQMLSREPSHAQEGGAGFQK---AHSVLFALVATFDRVNL  
RCA-A-  
GLFMGLGLAPPRHGIYTVRPKRKQMPSEPKDKVDGFELVHAVKEDARENHKLDMPEAMALAVE-  
DTSINVS GGVLAMDGD MASLEKVDSKRKMALAVTKWNISKINLDDLVISGAKPFRALS-

IEEADMTAALAVKTL-  
FLYLPNANNAELEADKVDGAGSSTVDAAADRQQGILLNPVMIVIQDSNTAALISNEGLDEWGTMA  
YKKHYAYAARMRLHMRIDGIEVGVAMEPNKQKAEEKITVKLEGDTRFRQLATEGVKEQMP-  
LHALNPDFAVLIAILVTPAVGRVAADQDVLGARVPCDASL-  
RELQKSQKGDALPISAIRLLGMRAARAMVDEDIMVAGKVSASLLVIVALETICRLVLLNDSEATLPWRL  
SVAERIEADTARAAGYAARPFMSKPSLCKVQAHANVADPIQEIAAGYVAKPNRFVFPVEGLAIQLILAS  
PHSRVGGAKRAGLGHLHEMAKELLGKADLMVQAASGTNTEGILTYMTTRQPTDLLHDDCLDIVIDM  
RRMSVV-----VQLNTV-  
HVVVSGVGDVGEFEIMQAAAPSGLVQVEKIDDR-  
GRERTMMYMYGAMEDLWLLSVRYADWVVDCAIGAIVLHVYAQTINRAFSLERLQLAGWPPEASSW  
WNTWQLWLNKDGFFDYDAAFRAQAAVLAAALYDYDMTDIEAVGRYLSRQELRVGYRIREQVAFAR  
LDPRTDILLQSQTRLSVIRHALEVVAIMIVREIVIEFTLVVAQEDVAMGHVECVLADAFDFTAKNADIGP  
VGLKTPDPVLGDGTVLNDAVLGKIDLANTVADFRYRMIDDGGRQLGVEWLT-  
NMLYTRIWLPPAQAAALKNLQPICFFLGHPDLNLALLADLWAGISKARMQALMASALIEQILDKVAAF  
ADPDATTHQSNKVKHFKYYGEEVDPVYLAYILKMFALVATQVTVSDRLLKDRYVLNLKIFRGFTSLWW  
LGAQLTDKGPAATIALDSIAGLGALVLFILL-RDSVLVETLYFRYVY--  
MKGYEAAKDVADADPEHLLNLAAVTRDVEWIEVVPAFFYYFKTAG-  
FEPFNTAIAREFFGLFRERLRIVDLVVPPEVEQLVAFVALAGTLPTSAAEQPGIACGLCEPNAAGVLE  
ADQDWNLHRSMGITLAFYDARES VKGWFDKGLHKDVAATGLSEAGTLTTPFHAAVTAKVCVPALHR  
VLDLGEFEASLIELDSAVTVADEEQTLADKPTRDNNVGAVGGVVLAGTMNMGANLDSVERGNNIII  
ELEESYS AVNGKKDG-  
KLTDKVLMLVLSGAYFVVLTRIASANALDRGAFDLLIDVPNDADNRDQGREL-----  
-----  
PDQYSFISMMIEASLDIMKTAEVLDYHVLEKGSRPPDFRVILIKGLHVRMLAGIATIIVGSAGRSEVT  
AYIQE-AVPITLRRVTFLPAFAASSCHVIDIFSTMLRPPERSVVKMLILETVael-  
LEVTRLENDKLERMEVLLPGLDLAQLLPLEAAADDFPQIVTIGAAIVAILSVAAPVVLDRDMLLSLAEIAV  
EAMALALALLMLTPDQGLTQKETAREAQMELIQGGVVLQVRASDRMLLAATADKVRLDTDEGTT  
SAFASLNLATVSDGFYVMSSAVLQLSSDLMMIISVARVLADKEHKNALVVRHPEQVKTQTTYAEGSP  
GMVLQTLTGAIPPLAVKAEVEELLWTLVAALWAVKAHLANATRPRKERVILILALTITVLLQSEGGGI  
GGG--  
GPAPKFLAAFSILTIIKAGDEVKVTTRVLDLNSRLGRPEESVNPEFRGAELEQSKYEANVEVDTME  
TIRRFVDIPFLVSTRTQHNESEDRGARMVLDVTRVRFIDL-  
VTCKSEIILAAARETDGIIAREMKGDLAALHPEAAALGKIAALQHFAIQDAHISNYVTAAIYSVLGMLLL  
VLFINETRIAKVWVPTREVTMVFIMAALATFFLVIGLVVSIVFMLAGISWNQLTTIVLGEGVMAVRQT  
STFPKDS-  
IGILQNTFADLICAGRVAKADIEKSLHIVVAGRVTRGTWYVIYLYEISQAQSPAGIMQRAFRQKTLSSQL  
IDGRMEVKIKVVTSNRYAQTYEIKGGQHRKGTRYNRVKVGHNIIPVDVMPRMKMAFTPPNLVLVKTF  
GAVVQKRFAALHMRHGA VQIGPMEVSSPYIRNKKARHAPGDAVVDLKP DNIVRSVAVVPELIWA  
RENEDNGAVHDKYVKPTHKLKAKRKTAVDKAQYDHRNQVELSFIGLAVKVLPPQKAI VHATAGMLMP  
TTSVAVTEGMKGIAATIRLDPM EKALIAIYIKMRPQLNLEGRD DKKIVKCLNNNLDDVEYGLGRRKIK  
PITIKSVYDVESRRATELVKLLPYKDDVEGRKSQFAEK--  
ALFEPLKAFMMLFGYIARAVYALNLRVIRRTILLVKCKIVVAAATVLSAIIIGLSVRLRHKTTNVADTKHH  
IKTITARANLTLAGAGKIKLNL SAGRVGKKGGRIKGYMPYNNFNIFDGL ESGRRAKVKEVAKLKKVDKEI  
KVDGVRVKQEGGRTPKAQLSNAIANSRVGV DIVGENVQE QSNPRANAEMGQIFAAIDARVFSHV G

ALIGHALEAVLAVVAIWGIGRAHNLLALKLRINAGIEMHSAA-VDVAVACA-  
FATAAGEAAAALWDASEGYLDDALITQHAVDTCLRRRSLSSELKTKKDAYMSLTCFAGKGDRFKVVE  
ATQTQAYEIVATRTAERHGIKAKGTFGKERAMMQILPTKPKVWVPVFVDEVELLAPIRQFAETVGDG  
VTVVKLQNDIKITPFEKAVASLAVSGKSTSVIYTVLEKVTELSKDIYTQRAKAHYGRGRLRSHVVTHTKS  
SRHLSMMKRTVVADPSMDAARLTDGEVSVVTGATMAFVMSEQDAV--  
GDVDMHFHEEPREADVGIAGPETFLATEHPRTLAVFFLRLAYLIHIVEIQTVKGFANAATYDVL RAMQ  
NKLD RKLSADI AKTRMVLVDNLKDMGVSEVAAKREAAGDPILSAFWINGVTANADIVLLVANLEVPT  
VPENIHCAIRLFYQRTLQAKERGGDVSVAVVPANKQIEAAEDTVIYSIKGKTPGSGQMKL TIEGISRSIV  
KSLAVQLFQVDTFLED TWLGTLLRAAIEVVFDAGDSKEAVDHVVERDTEYEFAPQKDIVSRKIRIYTP  
AAPSAVVIWDPAIDREDKAEAQGTILKIYGPNLQDINCFTDIGAEPKIESLKAWDEKEKYVVRDDIPE  
DI-  
TLVGKSSRVNKEFAIPDVAVCAPSKPGVTESIDRGDPKAGTCGEVANMAYPQESLVNNVSSANVQK  
NISMVLAGHPVGEMGISRQIERHLETNMCEIFVDRDDIDVALDFYILALTPLRVGLDPPNARVQIDGKE  
SRKLMAVL DGEAALQRHPKVSQAANLT-NAGIKARLPDDTLVVDGVVHGDISFATDLPDGRV-  
VTPVFNTVKAQLKIDKVLKAFHVVTLSFSNGKGEEHLIKRLNALKKNTRHYEMLLKIRETECAESPHAI  
SVGKVLKIDSL LQTICIAHYKAIEPLLADDTALGVMGHQGLLHVPRMLMIL--  
LHLWGVAARMELAHW-LQAEA-VTDQTMGLQVRERHYSY-  
SISEVVGNTFFAKTKEDDTEQRLHARNPI-VLL-GAKFGMV-  
ISPSGLKLRSTA EPTIGRGNTEDLILSTERLQDAMGYVVLQILLVFVDEVILAYGSGEDPLKFLVGDQAVT  
GRENPGMVTLTRRTFPLDLQRHAVFVMVFEDCTMKNLSHKKMHMNLVLIKSKGWIVNVSTKILISDQ  
AIASYAEDAGAHTQPSESALAAITSRVMAPIVLVVSQKPTAPSKTLFLEALALYDEVTATVLNPKPKYYIF  
EGDVVSILGTCDAAVLLGMQRPQPDRMRRAVVADAIRLAIALRASRVLDHLDNGLINFARGVSFIRGE  
HATLAPLLSAAIGPPAVAFVRNHAVSTKRSPYKAHTKFLHKADINKSLIAAGVDTIA  
>GCA\_020531945  
AVIKPVTMNAYAPVLMIAQSQVATVSGAGSPSLRAKTVYAKSGLQRKSETKWVAKDFYY-  
GVVKMANLVQLVSVISVDNRAVCTVAQLVEQEVVVHGMVALDAVKKKIALEAIEGMTAEDPAKVVDY  
QTRIAIRKWRDADDRADLLPVLLGLTLKIKFDPHQPLVHDLPIPVVYEVI-  
GIMAQKGTIEVDDCGISTAVSDVDPIAYVSPIDLA AVSGQKMDYIDQEA AVAQAKQDIDLEELA LESS  
VLVVGIKPLIPI-FRDDADE-MSFANRSRTLKTIVDLAVSYPEQTRAR---IAAAM-  
MDASQAAAAAEKRGTAEEIRIVKRMQRSAGLADDPELVMLEDA AEGNSNWAGQIYDDPISGSSED  
SAGNIVYAANKRQNFARSITFLRTVEISDQAAAPLMRGVKHNAKSRSRKLDDAIAALNFPNVEGIAI  
RAAAGKATATLLHDADEGEQILMLIVRWHVTWKTAIIYILEVAGNIVGLIELGGIAAVGRKDGLLRH  
HKLNGSLIEQKRVIDKLTLRLRAALKQKLGQDQVILVVRVQGDLVAEAEIQMG--  
DVGAVVAIQGPTIFVRRHRQTVIGDQEATV-VLKGVAEGPADAQALLRIRVDHTLVKLSVLLIPE-  
PVLVESVTIREGVGRALQIIQLDVYLLRDMGTGEETLAKSR SRELIRELLQIDPITGVRLAYGNLREREAKV  
LNIKEIDTLF--  
LAI IQGVTEPRMGNLPEGVCRTFVRAGPRAAAGMLFLILDDAGKIY AIDGDLREITKSIKSLIGLVDAAKP  
KALSAVYMTDRLKIRYEDVHVLISDADLYAYAEARRELLRMVPVYITNQAKRRQLVLLALSRLDGHRRV  
RMAIDVMIAAAIIESQAVNGAVHHAEPRI LLDDAEVVGSEMMINRQAALAMKEVLKVDVIVIFPEFQE  
KMVVS LRFCTDVAIFVIALICTVGAMLSREPSHAQESGAGFQK--RAHSVLFALQATFDAQNLKDA-  
-ANLFIGLGISAPRYGILYTVRPKRKQMPSEPDADKVDGFELVHAVKEDGRDN-KLDMPEAMALAVE-  
DATINVSGGVLAMDGDMAAIEKVDSKRKLALAVTKWNIARVSIQDLTISGARPVRAFD-  
ITVAQVTAALGEKVVS-  
LYLPKANNAELEADKIDGAGSSTVDAAADRQQGILLNPNVLVVIQDSNTAALISNEGLDEWGT MAYK

KHYAYAARMRLHMRTIDGIEVGVAMEPNKQKAEIKTVKLEGDTRFRQLATEGVKEQMP-  
LHALNPDAFV-LAVLVTPAVGRVAADQDVLGARVPCDASL-  
RELQKSQKGDALPISGIRLLGMRAARAMVEEDIMVAGKVAA-  
LLVIVAVETICKMVLLNDSEATLPWRLSVAERIEADTARAAGYAARPFMSKPSLCKVQAHANVADPIQ  
EIAAGYVATEQRFVFPVEGLPIQLILASPHSRVGVAKRAGLGHLEMAKELIGKADLMVQAASDTNTE  
GILNYLTTRQPTDLLHDDCLDIVIDMRRMSVV-----  
VQLNTV--  
VVVSGVRDVGAYEIMQAAAPSGLIQVERIDDRTGRERTMMYMYGAMEELWLLSVRYADWVVDCAI  
GAIVLHVYAQVINRAFSLERLQLAGWPPEASSWWNTWQLWLNKDGFFGYEAAFRAQAAVLSAALY  
DYEMTDVEDVGRYPSRQELRVGYRIRAQVAFDRDLPRTDILLQSRTLSVIRHALEVVAIMIVREIVIEFT  
LVVAQEDVAMGHVECVLADCFDFTAKNADIGPVGLKTPDPVLGDGTVLNDVAVLGKIDLANTVADFR  
YRMIDDGGRQLGVEWLTLRNLLYSRIWLPPAEAALKNLQPICFFLGHPNLNLHLLDALWAGISKARM  
QALMASALIEQILDKVAADFADPDATTHQSNKVKHFKYYGEEVDPVYLAYILQGYALVATQVTVSDRLL  
KDRYVLNLKV-RGFTSLWWLGAQLATKSPAATIALDSIAGLGALVLFILL-RDSVLVETLYRYVY--  
MKGYEAAKDVADADPEHVLNLAASVRDVEYIEIVPAFFYYFKTAG-  
FEPFNTAVAREFFGLFKERLRVIDVLVPPDRVMSLVAFVALAGTLATSAEALPGVIATGLCEPNAAGV  
LEADQDWNLHRSMGITLAFYDARESVKGWFDKGLHKDVAQTGLSEAGALTTPFHVAATAKACVPAI  
HRVLDLGEIEASLIEIDSAVTVADEEQTLADKPTTRDNSVGAVGGVVLAGTMNMGANLDSVERGNNI  
IIELEESYSAVNGKKDG-  
KLTDKVLMLVLSGAYFVVMERIASANALDRGAFDLLIDVPDDADNRDQGREL-----  
-----PDQYSFISMMINASLDIMQTAEV--  
DYHVLEKGSRPAPFRVILIKGLHVRHLAGIATIIVVGSAGRSEVTAYIQG-  
AVPITLKRVTFLPAFAASSCHVIDIFSTMLRPPERSTIKMLILETVAEL-  
LEVTRLENDKLERMEVLLPGLDMAQLLPLEAHAADFPQIVTIDASIVAILSVAAPVVLDRDMLLSLAEIA  
VEAMALALALLMLTPDQGLTQKETSREAQMKELIQGGVVLQVRAADRMVLAATADKVRDLTDDG  
TTSASFASLNLATVSDGFYVMSSAVLQLSSDLMMIISVARVLADKEHKNALVVRHPEQVKTQSTYAEQS  
PGMVLQTLTCAIPPLAIKADEVELLWTLVTALWAVKAHLANATRPRNERVLILILALTITVLLQSEGGGI  
GGG--  
GPPAKGLAAFSILTAKAGDEVKVTTRRVLDLNSRLGRPEESVNPEFRGAELEQSKYEANVEVDTME  
TIRRFVDIPFLVSTRTQHNESEDRGARMVLDVTRVRFIDL-  
VTKKSEIILARAETDGIIAREMKGDLAALHSEAAALGKIAALQHFAIQDAHISNYVTANIHSVLGMLLL  
VLFINETRIAKVVWPTTRREVTMVFIMAALATFFLVIGLVISIVFMLSIGISWNQMTTIVLGEGVMAVRQTS  
TFPKDS-  
IGILQNTFADLICSGRVAKADIEKSLHIVVAGRVTRGTWYVIYLYEISQAQSPAGIMQRAFRQKTLQSLSI  
DGRMEVKIKVVTSDRYAQTYEIKGGQHRKGTRYNRVKVGHNIPIVLPKMAFTPPNLVLVKTFGA  
VVQKRFASALTHMRHGAVQIGPMEVSSPYIRNKKARHAPGDAVVDLKPELIVRSVAVVPELIWAREN  
EDNGAVHDKYVKPTHKLKAKRTTAVDKAQYDHRNQVEMSFGLAVKVLPQKAIVHATAGMLMPTTS  
VAVTEGMKGIAATIRLDPMEKALIAIYIKMRPQLNLEGRTDKKIVKCLNNNLDDVEYGKLGRRKIPITI  
KSVYDVESRRATELVKLLPYKDDVEGRKSQFAEK--  
ALFEPLKAFMMLFGYIARSVYALNLRVIRRTILLVKCKIVVAAATVLSAIIIGLSIRLRHKSTNIADTKHHIK  
TIEDRANLTMAGAGKVKLNLSEGKVGKKGGRIKGYMPYNNYNIFDGLASGRRAKVKEVAKLKKVDKEI  
KVEGIRVKQEGGRTPKAQLSNAVANTRVGVDIVGEKIQEQSNPRANAEMGQIFAAIDARVYSHVGAL  
IGHALEAVLAIVAIWIGIGRAHNLLALKLRINAGIEMHSAA-VTHAVACA-  
FAAPAGDASALWDASEAYLGAIAITEHAVDTCLRRRSLSLKKTKKDAYMSLTCFAGKGDRVKIVEAS

QTQAYEIVATRTAERHGIKAKGTFGKERAMMQILPTKPVKVWVPVFDVDELLAPIRNFVETVGDGVT  
VVKLQNDIKITPFEKAVASIAVTGKSTSVVYTVLEKVTLSKDIIYTQRAKAHYGRGRRLRSHVVHTKSSR  
HLSMMKRTVVADPSMDAARLTDGEVSVVTGATMAFVMSEQDAV--  
GDVDMHFHEEPRREAIEVGIGGPETFLATEHPRTLAVLFLRAYLIHIVEIETTKDFSNAATYDVL RAMAN  
KLDRKLSADIAKTRMVLVDNLMDMGVTEVAAKRDAAGDKILSAFWINGVTANADIVLLVANLEVPTV  
PENIHCAIRLFYQIRITLQAKERDGDVSVAVVPANKQIEAAEDTVIYSIKGKTPGNAQMKLTIEGISRSVV  
KSLAVQLFQVDTFLDDTWLGTLLRAAIDVVFVDAGETKEAVDHHVVERDTEYEFAPQKDIVSRKIRIYTP  
AAPSAVVIWDPADREDKADAQGTILKIYGPNLQDINCFTDIGAEPKIESLKAWDEKEKYVVHRDDIPE  
DI-  
TLVGKSSKVNKEFAIPDVAVCAPSKPGVTESIDRGEPKAGTCGEVANMAYPQESLVNAVSSANVQKN  
ISMVLAGHPVGEMGISREIERHLETNMCEIFVDKADVDVALDFYILSLTPLRVGLDPPNARV SIDGKESR  
KLMAVMDGDADLQRHPKVSQATGTG-NAGIKARLPDDTLVDGVVHGDVSFTATDLPEGRV-  
VTPVFNDVKAQLKIDKILKAFHVVTLSFSNGKGEDHLIKRLNALKKNTRHYEMLLKIRETECAESPHAI  
SVGKVLKIDSLLTICVAHYKAIEPLLADDLTALGVMGHQGLLHVPRMLAVLHLWGMAAAMEVA  
QWGLQANA-VTDQTMGLALRERHFTY-SISEVVGNTFFAKTKEDDTEQRLHARNPI-VLL-  
AAKFGMV-  
ISPSGLKLTSTQASALGRENAEDLILSTERLQDAMGYVLRILLVFVDEVILAYGSGERPIKFLVGDQAVT  
GRQNPGMVTLTRTFPLDLQRHAVFVMVFEDCTMKNLSHKMHMNLILIKSGKWIVNVSTKILISDQ  
AIASYAEDAGAHTQPSESALAVITSRVMAPIVLVVSQKPTAPSKTLFLEALALYDEVTATVQNKPKKYYI  
FEGDVVSILGACDAAVLLGMQRPQPDRMRRAVADAIRLAIALR-----  
LEAGLINFARAVSLAVGVYTRFQAPP-AAMP-  
PALAFVRVNHVSVSTKRSPYKGHTKFLHKADINKSLIAAGVDTIA  
>GCA\_021735925  
AVIKPVTIDDYSPVLMIKQQQVATVSGAGSPTLRAKTVYAKSGLQRKAETKWVAKPFY-  
GVVKMSNLVQLVSISVDNRAVCTVAQLVEQEVVVRGMVALVAVKKKIALEAIEGMTAEDPAKVVDY  
AVRIAIRKFRDADDKSDLLPVLLGLTLKIKFDPHQPVVHDLPPVPVIFEVI-  
GIMAQKGTIEVDECGISTAVGDVDPINIVSPIDLAAGVAGDKMAYIDQEAASVSKAKDDIALEELAESN  
VLVVGI-PLIPI-FREEADE-MSFANRSRTLRTIVDMAVS AVSQTRA----AIASAL-  
MDQSQAAAALADKRGTAEEIRIVKRMQRSAGLADDPELVVLEDAAEGNSNWAGQIYDDDISGSSES  
SAGNIVHAANKRQNFARSITFLRSVEIADQAAAPLMRGVKHNAKSRSSRKLDDAIATLNFANVPEGIA  
IAAAAAPKPAETLLHDATEGEQILMLIVRWHVTWKTAVLYLM--  
AGDVVGLITLGGMAGVGRKEGILNRHHKMNGSLIEQKRIIDKLTLLRLRASLKQKLGAEQVILVVRVQG  
DLVAQAEIQMG--  
DIGAVVAIQGPTIFVRRHRQTIVIGDQEATVEVLKGVAQGPADAQALLRIRVDHTLVKLSVLLIPEVPVL  
VESVTIREGVGKALQIIQLDVYLLRDMGTGEETLAMSKSRELIRELLQIDPITGVRLAFGDLREREAKVLNI  
KEIDTLF--  
LAIATNLTEPRMANLPDGVCRNFVRAGPRAAVGMIFLILDPAGRIYIDGDLRENTKGIKSLIGLVDA  
KPKALSAVYATERLKVRYEDVHVLVSDANLYAYAEARSELLRMVPVYIINAAKRRQIILLALSLRDGHRR  
VRMSIDVMIAAAIIESHADHGTVHHAEPRIILLDDAEVVGSEMMISRQAALDLKQLIKTDVIVLFPFQE  
KM-----RIRAHSVLFALTATFDKANLRA---  
GLFLGLGLAAPRYGILYTVQPKRKQMPTEPDKEELDGFDLVHAVKEDGRDNHKLDMPEAMALAVEA  
TDTINVSGGVLGFDGDMAAVEKVDSKRKMALAIKQWTIAPKACLDLHISAARPFRAK-  
LEPADVTAALQKQLD-  
LFLPGANNAELEAEKIDGAGSSTVEAAADRNRGILLNPNVLVVIQDSNTAALIANDGLDEWGTMAYK

KHYAFAARMRLHMRTIDGIEVGVMPEPNKQKNEKIKTVKLEGDTRFRQLATEGVKEQMP-  
LHALNPDAVLI AVLTPAVGRVAADQGV LGARVPCGASL-  
RELQKSQTGDALPISGIRLLGMRAARAMVDEDIMVAGKVAA-  
LLVIVALETICRLVLLNDSEATLPWRLSVATRLEADAKRAAGFAARPFMSKPSLCNTQAHAKIADPIQEI  
AAGYVAREERFVFPVEGLPIQLILSSPHSRVGGAKRAGLGHLEMAKELQGRAVLMVLAASNTNTEGL  
LRYATTRQPTDLLHDDCLDIVIDMRRMSVV-----  
VRMNTV-HVVIDGV-  
PVGDFEIMQAAAASGLIEVEQVDDRTGRERTMMWMYGAMEELWLMSLRYADWIVDCTIGAIVLHV  
YAQTINRAFSLERLQLAGWPQEAQGWWNTWQLWLNKDGFFGYAAAFRAVA AVLKADLYDYDMR  
DVDGVGGRYQSRQELRVGYRIREQVDFAKLDPRTDILLQSMTRL SVIRHALEVVAIMIVREIVIEFTLVVA  
QEDVAMGHVECVLADAFDFTAKDADIGPVGLKTPDPVLGDGTVLNDAVLGKIDLSNTVADFRYRMI  
DDGGRELGV TWLTLQNILYARIWLPPAAAALKNLQPICFFLGHPDLNLL-  
LEALWAGISKARAQALMAGALIEKILDKVAAFAEPDATTHQSNKVKHFKYYGEEVDPVYLAYILDLFAL  
VATQVTVS DRLLTERYVLNLKV-RGFTSVLWLA AQIGNKGPSATIISLDSVAGLGALVLFILL-  
RESVLIETLYRYVY-VMKGYEAAKD VADADPEHLLNLA AVTRDVEWIEIVPAFFYYFKTAT-  
FQPFNTAVAREFFGLFKERLRIVDVLLVPPDRVTALVEFVALAGTLPTSAAALPGVIACGLCEPNAAGVL  
EADQDWNLHRSMGITLAFYDARES VKKWFDKGLHKPVAATGLSEAGALTPFHV GATAKVCAPALH  
RVLDLGEIEGSLIEDSAVTVADEEQTLADKP TTRDNSVGAVGGVVLAGTMNMGANLDSVERGNIII  
ELEEEQYSTVNGKKDG-  
KLTRVLMVLSQAYFPVLR RMASANALDRGTFDLLVDVPDDADNRDQG GEL-----  
-----PDQYSFISMMIEASLDIMETA EVL-  
DYHVLETGSRPPDFRIILIKGLHIRQLAGIATIIVVGSAGRSEVTAYIQG-  
AVPITLRRKTF LPAFAASSCHVIDIFSTMLRPPERSTIVMLILETVAEL-  
LAVTRGTNEKLERMQVLLPGLDLAELLPLEAAAADFP AIVTIEAAIVAILSVA AEPVVLREMLLSLAEIAV  
DAMALALALLMLTPDQGLTQRELAREAQM KELIQGGVVLQIKAADRMVLAATADKVRLD TDDGTT  
SAFASLNLATVSDGFYVMSSAVLQMGSDLMMIIKVARVLADKETKNALVVRHPEQVKTQTTYAEGSP  
GMVLQTLTGSIPPLAIKAEIE LLWTLVAALWRVKAHLANATRAHNERVLILALTLITVLLQSEGGGVG  
GG--  
GPAAKILAGFSILT IKAKVGEEVRKVTRRVLDLNSRLGRPEESVNPEFRGAELEQSKFEAENVEVDTMETI  
RRFVDIPFLVSTR TQHNESEDGRSRMVL DVTRTRFIDL-  
VTKRSEIILAARAETDGIIAREMSKDLAALHPEAAALGKIAALQH FIAISDAHISNYVTQEINSVLGM LLL  
VLFINETRIAKVVWPT RREV TMVFIMAALATFFIVIGLFISIVFMLS GISWNQMTTIVLGE GVM AVRQTS  
TFPADS-  
IGILQNTYADLICAGRVAKADIEKSLHIVVAGRVTRGTWYVIYLYEISQAQGEAGIMQRAFRQK TLSQS  
LIDGRMEVKIKVVTSDRYA-  
TYEIKGGQHRKGTRYNRVKVGHNIPVQVLPRMKMAFTPPNLVLVKTFGAVVQKRFAQAL THMRHG  
AVQIGPMEVSSPYINSKKARHAPGD AVVELKPENIVRSVAVVPELIWARENEDNNAVHDKYVKTT HK  
LAAKRKKA VDKAQYDHRNQVEMSFGLAVKVLDPKA-----  
-----  
RMRPQLNLAGKTDKKIVKCLNNNLDDVEYGKLGRRKIPITIKSVYDVESRRATELVKLLPYKDDVEGR  
KSQFAEK--  
ALFEPLKAFMMLFGYIARAVYALNLRVIRRTILLVKCKIVVAAATVLSAIVGV SIRLRHKSTNVAETNH  
HIKTIDKRARMTLAGDGKVKLNLSEGRVGKKGGRIGYMPYNNYNIFDGLASGRRAKVKEVAKLKKV  
DKEIKVEGIRAKQEGGRTPKPQLSNAVANTRVGVD-

VGENIQEESNPRANAEMGQIFAKIDARVYSHVGALIGHALEAVLAVVAIWGIGRAHNLLALRLRINAGI  
ELHSAA-VEVAVACA-YAVPAGEASLMVDVSEGPKPALLITEASVDICRLRRRSLSE-----  
-----

RHGIHAKGTYGKERAMMQILPTKPVKVVVPFVDEVELLAPIRAFAETVGDGVTVVKLTDDVKITMFE  
KAVASLAVAGKNTSVIYTVLEKVTQLMKDIIYTQRAKAHYGRGRLRSHVVTHTKSRRHLSMMKRTVV  
ADPSMDAARLTDGEVSVITGATMAFVMSEQDAV-  
PGDVDMHFHEEPRREAIEVGIAGPETFLATEHPRVLAVIFLRLAYLLHIVEIQTVKDFSNAATIIDVLRAM  
NAKLDRKLSADIAKTRMVLADNLMMDMGVTEVAARREAAGDPILSSYWINGVTANADIVLLVANLEVP  
TVPENIHCAIRLFYQRVTLQAKERGGDVSVAVVPANKQIEAAEDTVIYSIKGKAPGSAQMKLITIEGISRS  
IVKALAVQLFQVDTFLDDTWLGTLLRAAMDVVFVDAGDGKEAVDHHVVERDTEYEFAPQKDIVSRKIRI  
YTPAAPSAVVIWDPAIEREDKAEAQGTILKIYGNLQDINCFTDIGSEPKIESLKSWEDEKEYVVRDDI  
PEDIDTLVGKSSRVNKEFAIPDVAVCAPSKPGVTESIDRGEPKAGTCGEVANMAYPQESLVNNVSSAN  
VQKNISMVLAGHPVGEMGISREIERHLETNMCEIFVDKPDIDVALDFSTLALTVLRVGLDPPNARVQIG  
GKESRKLMAVNDGDAPLQRHPKVSEATGTGI-AGVKATLADDALELDGVVHGDISFTLTDLPEGRV-  
VTPVFNDVKAQLKIDKILRAFHVVTLFSNGKGEDHLIKRLNALKKNTRHYEMLLKIRETECAESPHA  
IDVGKVLKIDALLQTICVAHYKAIEPLAADLTALGVMGEQGLLHVVPRLMILAVMHLWGLEATMALP  
RWGLQTRRCVTDQTMGLATRARRHYSY-CISEVVGNTFFAMTKEDDTEQELHARNPI-VLL-  
CGKFGMV-

ISPSGLRLASTAPAPLGRDNHEDLITLTERLQDNMGYYVLQILLVFVDRVILAYGSGEDPIKFLVGDQAV  
TGRQNPGMVTLARRTFPELQRDVAVFVVFADSTMKNLSHRKMHMNLVLIKSGWVNVNSTKILIS  
DQAIASYAEDVGAHTQPSALAAITSRVMAPIVLVVSQKPTAPSKSLFLEALALYDEVATVNLAPKK  
YYIFEGDVISVLNTCDAAVLLGMQRPQPNRMRRAMVADAIRLAIALRAAGIITRLEEGLINFARAVGLA  
AGVYPDFGALVMAIIMADALAFVRNHAHVSTKRSPYKGTGHTKFLHKADVKNQLIAAGVDTIA  
>GCA\_022096995

AVIKPVTMNTYAPVLMIAQSQVATVSGAGSPSLRAKTVYAKSGLQRKAETKVVSKDFYY-  
GVVKMGNLVQLVSVISVDNRAVCTVAQLVDQEVVHGMVALEAVKKKIALEAIEGMTAEDPAKVVDY  
-GEIELKKFRDADDRADMLPVMLGLTLKIKFDPHQPLVHDLAIPVVFVV-  
GVMVQQGTMEVDDCGVSTALSDVDPIVYVSPIDLAAGVAGDAMAYIDQEAATAAKASIDLD-  
LALESNVLVSI-PLLIPV-FEAGGDT-MSFANRSRTLKTIVNLAVSYPAIKRA-----IAAAM-  
MDASQAAALSEKGTAEIIRIVKRMQRSAGLADDPDLVMLEDAEAGNSNWAGQIYDDPLSGSSES  
SAGNIVFAANKRQNFARSITYLRFVEISDKAAAPLMRGVKHNAKSRSRKLDDAIAVLNFANVPEGIAI  
RAEAGKSQDLLLLHDATEREEILLIVVRWDVTWKTAVIVSLFPTAGDVVGLIDVGGIGAVGRKEGLNRH  
HKLNGSLIEQRRITEKLTLLRLAALKQKLGKDQIIIFVVKVAGDLVAAATVQM---  
AVGAVVAIQGPTIFVRRSRQTVIGDQEAATVEILQGVAEAGPADAEALLRIRVDHTVVKLSVLLIPQ-  
PVLVESVTIREGVGKALQIIQLDVYLLRDMGTGEETLAKSKS-----  
-----

ISILKNLTEPRMDNLPAGVCRTFVNAGPRAAVGMLFLLDDAGKIYTIDGDLRENTKSIKSLIGLVDAAK  
PKILSAGYATRRLKIRYADVHVLISDADLYAYAEERRELLRMVPVYIINAAKRRQLILFALSILKGGHRRAR  
AALGVMIAAAILESQAEQGAVNHEEPEVLLDDAEVVGSEMMISRQAALKLVFKLDIIVIFPEFQEKM  
VVSLKFFCTDVAIFVIALICTVGQMLSREPSHAQEGGAGFQK----HSVLFALSVTFERRNLRDA--  
AGLFLALGLAPPRYGVFYTEQPKRKQMPSEADSEKVDGFDLVNAIKEDTTS-EELDMPEAMALAVE-  
DASINVNAGVLALNGDMAAVEKVDSKRKMALAVEKWTISPVSVDIKISGAQPFRLN-  
IEQADVSASLPKKEV--  
LFLPGANNAELEEELKDAGASTAEVAEDKQSAILLVNPNVLVVIQDSNSAALIANDGLEEWGTMAYKK

HYALAARMRLHMRTID----GVAMDPNKQKAEIKITVKLDGDTRFRQLATDGVKEQMP-  
LHALNPDAVLIPVLVTPAVGRVAADAGVLGARVPCDASL-  
RELQKSQKGSALPISGIRVLGMRAARAMVDEDIMVAGKVAA-  
LLVILALETITAIVLMNDSEATLPWRLSVAERLEADTQRSAGYASRPFNSKPSLCKTQAHAKIADPIQEIA  
AGYVATEQRFVFPVEDIPIQLILASTHSRVGAACKRAGTGHLHEMAKELQAKAVIMVQNEPATNTDGLL  
NYLTTQQPTDLLFEDCLDVVIDMRRMSVV-----  
VHLNTV--  
VVVEGVTPVGSYEIMAAAAHSGLVQVERMDERTGRERTLMWMYGAMEELWLLSITYADWVINCAI  
GAILLHVYAQQINRAFSLERLQLAGWPPEATRWWTWQLWLNKDGFFSYEAAFRA-  
KAVLKADLDDYDMSDVEGVGRYQSRQEIRVGRIREQVAFALDPRDILLQSMTRL SVIRHALKMOV  
AILVREIVVEFTMVVAQEDVAMGHVECVLADSFDTAKNADIGPVGLRTPDPVLGDGTVLKEAVLGKI  
DLANTVADFRYKMLLDGGRELGVSWVTLQNMIIYARIWVPPAQADLKDLPICFFLQHPQLDL-----  
----  
ISKARANKLMAGALIEKILEKVAADFADPEATTHQSKKL RHFKYYGEEVDPVYLAYILDMFALVATQVTV  
SDRLLKDRYVLNLKVFRGFTSLLWLSAQIGDKGPCATIITVQTVAGLGALVLFILL-  
RAVVLVETLYYKYVYVVM LGYQAAKDVAADADPEHFLSLAHASRDVEWIEVIPAFFYYFKTAKKNLTKN  
TALAKEFFGLFEERLKIIDLVLVPPDRVEALVEFVALAGTLATS AKALIGIIACGFCEPNAAAVLEADQDW  
NLHRSMGITLAFYKAQVS VKKWF DKGLHKDVAAIKLTEAGALTTPFHAGSTAKQCVPAIHRVLDLGD  
VEAALIEIDSAVVVADEEQLADKPTTRENSVGAVGGVVLAGTMNMGANLDSVERGGNIIIEEEESY  
NAVNGKKNDBGKMTDKVLMVLSQAYFPVLKRMASANALDRGAFGLLIDAPNDADNQDHGRCLTIP  
APTIHAESAHLFAESDIERIAWIAPIHLLGTLDV LGFEPDQYSFISMMIEASLDIMETA EVMEDYHVLEK  
GSRPPGFRVILIKGLHIRLLAGICTIIVVGSAGRSEITAYIQG-  
AVPITL NKQTFLPFAAASSCHVIDILSTMLRPPERSTIKMLILETVAEL-  
LEVTRIENDKLERMDVLLPGLDIALLLGLLAAAADF AEIVTIDAAITAILSVA AEAVVREMLLTMAEIAVT  
ALALAMALLMLTRDQGLHQREAAREAQMKQLIQGGTVLQVKAADRMMLASTADKVRLATDEGTT  
SAFASLNLATVSDGFYVMSSAVLQMSSDLMMIVAVARVLADKETKNALVVRHPEQVKQTSTYAEGS  
PGMVLQTLTSAIPPLAIKPEDVELLWTLVAALWRVKSHLANAARPHIERVLILILALS LITVLLQSEGGGM  
GGG-AGPAAKILAAFSILT--  
KAGEEVRKVTRRVMDLNSRLGRPEEAVNPEFRGAELEQTKYEAESVEVDTMETIRRFVDIPFLVSTRTQ  
HNESEDRGARMVLDVTRVRFIDL-  
VTKRSEIILAAARETDGIIAREMGKDLAALHPEAAALGKIAALQHFAIQDAHISNYVTAEIHAVLGMLLL  
VLFFQEVRVSKVWVPTRRREVTMVFI LAALAIFFLVIGL--  
QIVFMLSGISWNQLTTIVLGEGIMVVRQTSTFPADS-  
IGILQNTYADLICAGRVAKADIEKSLHIVVAGRVARGTWYVIYLYDISQAQGQSGIMQRAFRQMTLSQ  
SLIDGRMEVKIKVVTSDRYA-  
TYEIKGGQHRKGTRYNRVKVGHNIPVQVLPRMKMAFAPPNLVLVKTFGAVVQKRFAQALTHMRHG  
AVTIGPMEVSSPYISNKKARHAPGDSVVDLKPENIVRSVAVVPELIWARENEDNGAVHDKYVKTT HKL  
AAKRKKAVDKAQYDHRNQVELSFIGLAVKVLDPKA-----  
----  
RMRPQLNLGGQTDKKIVKCLNNNLDDEY GKLGRRKIPITIKSVYDVEHKRATELVKLMPYKDDVES  
RKSQFAEK--  
ALFEPLKAFMMLFGFIARSVYALYLRVIRRTILLVKTKIVVNAATVLSAIIIGVSIRLRHKSTNVAETNHHI  
KTIEARARMTLAGTGKVKLNLHEGKIGMKGGRIKGFMPYKNFNIFDGLASGRRAKVAELAKLKDVDKTI  
SVDGVRVKQGGGRTPKAQLSNAI-



NTRVGVDIVGEDEQDASNPRANAEMGQIFAKIDARVFSHV GALIGHALEA-  
LAVVAIWAIGRAHNLLAVRLKINAGIEMHSAA-VAAAVAAA-FAQAAGEA-  
AIADVSEGLD GALALSAMSVDVCRLRRSLSE-----  
RHGIRAKGTYGKERAMMQITPTKPVKIWVPVFGEDELLAPIRAFAETQGDGVTWV KLTTDVKVTMFE  
KAVASLAVTGKATSIVYTVLEKVTQLMKDIITYTQRAKAHYGRGRLRSHVTTTKQRRHLSMMKRTVIA  
DPSMKAARLTDGEVTVITGATMAFVMSEQDAV--  
GDVDMHFHEEPSREAEEVGIGGPETFLTDDQPRVLALLFLRAYLIHIVEIETTGGFADAATIYDVL RAMQ  
NKLDRKLSADI AKTRMVLTDNV TDMGVTDVAPRRNAAGDKILSAFWINGVTANADIILLVANLE CPC  
VPENIDCAIRLFYQRTLQAKERGGDVSVAV VPAANQIEAAEGTVIYSIKGQTPGTGQM KLTIEGISRSV  
VKSLAVQLFQVDTFLNDTWIATWLRAAKDVV FVASEDGKEAVDHVVERDTELEFAPQKDIVARKIRIF  
TPAAPSAVVIWDP AIDREDKAEAQGTILKIYGPNLQDINCFTDIGAEPKIESLKAWDEKEKYVVRDDIP  
EDIDTLVGKSSKVNKEFGIPDVAVCAPSKPGVTESIDRGEPKAGTCGEVANMAYPQESLVNAVSSANV  
QKNISMVLTGHPVGEMGISREIERHLETNMCEIFVDKADVDVALDFHILALTPLRVGLDQPNARVQID  
GKESRKLMAIQDGEAALQRHPKISAATGTG-KAGTKARLPDDALILDGVMHGDLSFTATDLPEGRV-  
VTPVFNDVKAQLEIDKVILRGFHVVTLSFSNEKGEEHLIKRLNALKKSTRHYEMLLKIRETECAESPH AIS  
VGKVLKIDKLLQTCQAHYKAIEPLLADDTALGVMGQQGLLHVVPRLMILAVMHMARLEIALQIAG  
WRLQAQAILTDQTMGLSIRARDWSY-AISEVVGN TFFARTKEDDTEQRIHARNPV-VLL-LGKFQMI-  
VSPSGLTLASTE PSQLDRGNAEELILSTERLQDEMGYYVLQILLVFVDMVILAYGSGDDPIKFLVAEQA  
VTGKQNP GMMVTLTR-  
TFPLELQRNATFVLVLEDCTMKNLSHKKMHMNLI IISKSGWVVNVSTKILISDQAIASYAEDAGAHTQ  
PSESALAAITSRVMAPIVLVVSQKPTAPSKTLFLEALS LYDEVTATVLNKP KKYIFEGDVAVLGTLDAA  
VLLGMQRPQPNRMRRAVVAQAIRLAIAIMASGVITRLEEGRINFAR SVSLAVGVYPTLDMLPAAI IH-  
TALEFRVRNHVDVSTKRSRPYKAHTKFLHKADVDKSLIATGVDTLA  
>GCA\_023015625  
AVIKPVVMDTYAPVLMIRQQQVATVSGAGSPTLR AKTVYAKSGLQRKVETKWVSKDFYY-  
GVVKLGNIVQLVSISVDKRSVCTVAQLVDQEVVVHGMVALEAVKKKIALEAIDGMTAEDPAKVVDYA  
SEIELRKFRD TDDRADMLPVM LGLTLKIKFDPHQPVVHDLPIPVVFEVV-  
GIMVQRGQIEVDECGISTALSDVDPIVYVSPIDLA AVAGDQMAYIDQEA AVTAAKAAIELELALES AV  
LVVGI-PLLIPV-FAADGDV-MSFANRSRTLKTIVNLAVSY PEIKRA-LDN-IAAAM-  
MDASQAAAALSEKGTAE EIRIVKRMQRSSGLADDPDLVM MEDAAEGNSNWAGQIYDDPLSGSSES  
DSAGNIVFAANKRQNFARSITYLRAVEISDQAAAPLMRGVKHNSKSRSSRKVNDAIAVLNFPNVPEGI  
AIRAAAGKTRDILLHDATEGEEILLIIVRWHVTWKT AIIISLFPTANDIVGIIEMGGIGAVGRKDGLLNRHH  
KLNGLSIEQRRIVEKLTLRDRAALKQKIGKEQIIIFVVKVAGDLVAKAKVQM---  
SVGTVVAIQGETIFVRRHRQTVIADQEATV-VLRGVAEGPADAQALLRIRVDHTVVKLSVLLIPD-  
PVLTESVTIREGVGKALQIIQLDVYLLRDMGTGDETLAKSKSREVIREVLQVDDITGVRLAFGQLKERLV  
KGGTMKELGTL---  
IAILKKITEPRMANLPDGVCRTFINAGPRAAVGMIFLL LDDAGKIYTIDGDLRENTKSIKSMIGLVDAAKP  
KTLSAGYATARLKIRYADVTVLTSDADLYAYAEERNELLRMVPVYITNQA KRRQLIIFALS LKGGHRRAR  
AALGVMIAAAILESQAEQGPVNHEEPGVLLDDGEIVGSEIMISRQAALDVKQIIKTDIIVIFPEFQEKMV  
VSLKFFCTDVAIFVIALICTVGEMLSREPSHAQEEGAGFQKRIRGH SVLFALAVTFERRNLRDA--  
ADLFLNLGLAPPRYGVFYTEQPKRKQMPSEEDKKKVDGFDLVAAIKSDATK-EELDMPEAMALAVE-  
NETINVNAGVLAMNGDMAAVEKVDSKRKM AVEKWTIARVALTDLKISGAQPFRALS-  
IEQADVSATLPSKQVWFLFLPGANNAEMEEELD GAGSSTAEEAEDKQLGILLVEPVLVVIQDSNTAS  
LIANGGLEEWGTMAYKKHYAFAARMRLHMRTID-----

EMDPNKQKAEIKITVKLEGDTRFRQLATEGVKEQMP-  
LHALNPDAVLVPLVTPAVGRVAADAGVLGARVPCDASL-  
RELQKSMKGNALPISGIRLLGMRAARAMVDEDIMVAGKVS-  
LLVIVALETITHLVLMDSEATLPWRLSVAERLEADTKRAGGFAARPFNSKPSLCKTQAHHKIADPIQEI  
AAGYVATEERFVFPVEGPIQLILASPHSRVGEAKRAGLGHLHEMAKELMGKAVIMVLNEPGTNTEGLL  
NYLTTQQPTDLLFEDCLDVVIDMRRMSVV-----  
VQLNTV-  
HCMIPGTRDLAEREIMAAAAHSGLVQIERVDERTGRERTLMYMYGAMEELWLRSLTWGDWVVDCA  
IGAILLHVYAQQINRAFSLERLQLAGWPPEASRWWNTWQLWLNKDGGFFGYEAAFRVAVLKADLD  
DFEMSDVEGVGRYQSRQQRLVGYRIRQQVAFEQLDPRTDILLQSMTRLSVIRHALTMVAILIVREVW  
EFT-  
VVAKEDVAMGHVECVLADSFDTAKDADIGPVGIRTPDPVLGDGTVMKEAVLGKIDLANTVADFRYK  
MLIDGGRDLGVSWVTLQNLLYARIWVPPAQAALKNLVPIAFFLGHTELNLAIFPELWAGISKARANKL  
MAGALIEKILEKVAADFADPEATTHQSKKLRFKYYGEEVDPVYLAYILELFSLVATQVTVSDRLLKDRYV  
LNLKIFRGFTSLLWLSAQIGAKGPAATIITVQTIAGLGALVFIILLRVVVLVETLYFKYVY--  
MLGYQAAKDVAADADPEHFGSLAHASRDVEWIEVVPAFFYYFKTATSRLSKNTALAKEFFGLFKERLRII  
DVLVWPPDRVEALVAFVALAGTLATSAQALVGVIACEFCEPNAAVLEADQDWNLHRSMGITLAFYD  
ARESVKGWFDKGLHKDVAATGLREAGALTPFHAGENAKQCVPAIHRVLDLGEVEAALIEIDSAVVV  
ADEEQSLADKPTTRENSVGAVGGVVLAGTMNMGANLDSVERGGNIIIEEEEQYSAVNGKKADGKV  
TDKVMVLSAAYFPVLKRIASANALDKGAFGLLIDAPDDADNKDHGRDLTIPAPTVHAESAPLYAESEI  
ERIAWIAPIHLLGTDAVLGFEPDQYSFISMMIDASLEIMETAEVLDYHVLETGSRPPGFRILIKGLHIRL  
LAGVCTIIVVGSAGRTEITAYIQG-  
AVPITLNNKFTLPAFAASSCHVIDIFSTMLRPPERSAIQMLILETVTEL-  
LEVTRIENDKLERMLALLPLGDVAALLSLVAAAKDFASIVTIDQAITAILSVAAEAVVLREMLLTAEIAVT  
ALALALALLMLTPDQGLHQKERAREAQMKAIIQGGVVLQVKAADRMMLASTADKVRDLTDEGTTS  
AFASLNLATVSDGFYVLSSAVLQMSADLMMIVAVARVLADKETKNALVVRHPEQVKTQSTYAEOSP  
GMVLQTLTAAIPPLAIKPETVELLWTLVTALWVKVKAHLANAARPHIERVLILILALSITVLLQSEGGGM  
GGG--  
GPAAKALAAFSILTIIKAGDEVKVARVMNLNSRLGRPEEAVNPEFRGAELEQSKYEAEVNDVDTM  
ETIRRFVDIPFLVSTRTQHNESEDGRGARMVLDVTRVRFDL-  
VTKRSEIILAAARETDGIIAREMGKDLAALHPEAAALGKIAALQHFIQVQDAHISNYVTATIHAVLGMML  
LVLFIQEVRISKVWVPTREVTMVFIMAALAIFFLVIGLGVQLVFMLSGISWNQLTTIVLGEIMVVRQT  
NTFPEDS-  
IGILQNTYADLICSGRVAKADIENSLHIVVAGRVARGTWYVIYLYEISQAQDQSGIMQRAFRQMTLSQ  
SLIDGRMECKIKVVTSDRYA-  
TYEIKGGQHRKGTRYNRVKVGHNPVQVLPRMKMAFAPPNLVLVKTFGAVVQKRFAQALTHIRHGA  
VTIGPMEVSSPYITNKKARHAPGDAVVDLKPENIVRSVAVVPELIWARENEDNGAVHDKYVKTTHKL  
QAKRKAANDKAQYDHRNQVELSFIGLAVKVLDPKAIVDATAGTLMPTETVTVTEGLKGVAATIRLDP  
MEKTLIAYIKMRPQLNLGGQTDKIVKCLNNNLDDVEYGKLGRRKIKPITIKSVYDVEHRRATELVKL  
MPYKDDVEGRKSQFAEK--  
ALFEPLKAFMMLFGYIARAVYALYLRVIRRTILLVTKIVVNASSVLSAIIIGVSIRLRHKSTNVCETKHHI  
KTIEKRARMTLAGTGKVKLNLSPGKVGKKGRIKGYMPYKNFNIFDGLASGRRRAKVKEKAKLVNDKAI  
SVDGIRTKQQGGRTPKAQLSNAI-  
NTRVGVDIVGENEQUEESNPRANAEMGQIFAKIDARVFSHVGALIGHALEAVLAVVAIWDIGRAHNLL

AIRLKINAGIEMHSAA-  
VKNAAAAFAQSAGEASALWDISEAYLGTLAISDMSVDVCRLRRSLNELKTKKDAYMSLTCFGG  
KGDKVKIVEATQTQAYEIVATRTAERHGIRAKGTYGKERAMMQITPTKPKIWWPVFVNETELLAPIRA  
FAESTGDGVTVVKLTTDVKVTMFEKAVASIAVTGKATSIVYTVLEKVTELMKDIIYTQRAKAHYGRGRLR  
SHVVTTKQRRHLSMIKRTVVADPSMDAARLTDGEVYVITGATMAFVMSEQEAV--  
GDVDLHFHEEPQREADLGIAGPETFLATDQPRVLLFIHLKAYLIHIVEIGTVNGFSDAATYDVLAMQ  
NKLDRLKSADIATRMCLTDNVSDMGVTEAAAKRDAAGDKILSAFWINGVTANADIILLVANLETHC  
VPENIDCAIRLFYQRTLQAKERGGDVSAIVPAANQIEAAEGTVIYSIKGQTPGTGQMKLIEGIRSIV  
KTLAVQLFQVDTFLDDTWIATWLRAALQVVFVGAEDGKEAVDHVVERDTELEFAPQKDIVARKIRIFT  
PAAPSAVVIWDPAIEREDKAEAQGTILKIYGNLQDINCFTDIGAEPKIESLKAWDEKEKYVHRDDIPE  
DI-  
TLVGKSSKVNKEFAIPDVAVCAPSKPGVTESIDRGEPKAGTCGEVANMSYPQESLVNAVSSANVQKNI  
SMVLSGHPVGEMGISREIERHLETSMCEIFVDKDDVDVALDFYILALTPLRVGLDPPNARVQIDGKESR  
KLMAIQDGDADLQRHPKVSQSTGTGLKAGVKARMPDDALMVDGVMHGDVAFTATDLPDGRV-  
VTPVFNEVKAQLKIDKVLLRAFHVVTLFSNDKGEEHLVKLRLNALKKSTRHYEMLLKIRETECAESPHA  
ISVGKVLKIDALMQTICQAHYKEIPELLADELTALGVMGEQGLLHIVPRLMILSVLQLLHLEIALQLHRW  
GLQAAAMVTDQTMGLYIRDRDWSF-AISEVVGNTFFARTKESDTEQKIRARNPV-VLL-LGKFKMI-  
ISPSGLGLASTAESSQGRGNTEELILSAERLQDEMGYYVLQILLVFVDEVILAYGSGEGPIKFLVAEQAVT  
GRQNPGMVTLTR-  
TFPLELQRNATFVMVFEDCTMKNLSHKKMHMNLVVIKSGWIVNVSTKILISDQAIASYAEDAGAHT  
QPSESALAVITSRVMAPIVLVSQKPTAPSKTLFLEALSLEYDEVSTVQNKPKYYIFEGDVAVLSTLD  
AAVLLGMQRPQPDRMRRAIVADAIRLAIALRASGIVTRLKEGIINFSRAVNFAARFYPVETA-----  
--EFRVRNHADVSTKRSRPYKAHPKFLHKADVDKSLIATGVDTLA  
>GCA\_023015725  
AVIKPVTMNTYAPVLMIAQSQVATVSGAGSPALRAKTVYAKSGLQRKTESKSVALPIYY-  
GVVKMSNIVQLVSISVDSRAVCTVAQLVEQEVVHGMVALDAVKKKIALEAIDGMTAEDPAKVMDY  
--EIEIRKFRDVEDDRADLLPVMGLTLKIKFDPHEPVVHDLAIPVFEVV-  
GIMVQRGQIEVDECGVSTAISDVPVIVVSPIDLNAVAGDKMAYIDQEGAVSAAKDDIALEELALESA  
VLVVGI-PLLIPV-FEADGDV-MSFANRSRELKTIVNLAVGYPEVKRAR---IASAM-  
MEQSQAALAEKKGTAEEIRIVKRMQRSAGLADDADLVILDDSAEGNSSWAGQIYDDPLSGSSES  
VGNIVFAANKRQNFARSITELRKVEISDKAAAPLMRGVKHNAKSRSSRLDDAIAVLNFPNVPEGIAIR  
AEQEKPKDTLLHEAAEGEEILLIVRWHVTWKTATIIYLMNDAGDIKDMITLGGVGAVGRKEGILNRHH  
KMNGSLIEQKRVEIKTLRLRAALKQRLGKDQVIFVVKVAGDLVAAAQIQM---  
NVGAVVAVQGPTIFVRRSRQTVIGDQEATVEVLKGVAEGPADAEALLRIRVDHTTVKLSVLLIPDVPVL  
VESVTIREGVGKALQIIQLDVYLLRDMGTGEETLAKSKSKEQIRSVLQVDPITGVRLAYGKLRLRVKGG  
SQKELGTL---  
LSILNNITEPRMANLAEGVCRTFIEAGPRAAVGMIFVLVDNAGKIYSIDGDLQENTKSIKSMIGLVDAK  
PKILSAGYLTGRLKIRYADVTVLISEADLYAYAEVRRELMRMVPVYITNAAKRRQLILFALSRLGGHRRRA  
RMSLVNMLAAAILESQAEQGAVNHADPDILLDDGEVVGSEMMISRQASLDLKAVLKIDVIVIFPEFQE  
KMVVSLEKFFCTDVAIFVIALICTVGDMLSREPKHAQEGGAGFQKRIRAHSVLFALATTFDRANCR--  
DVPDLFAGLGLADPRYGILYTEQPKRKQMPSEPKDRVDGFELVHAIKADATDNHGLEMPPEAMALA  
VEATESINVSAGVLAMKGDMAVEKVDKSRKMAHAVEKWTIAKVPIIDVHISGAAPFRCLG-  
IEQADVSAALPRKELDALYLPGANNAELEEELKDGAGSSSTIEAAADKQAAILLVNPNVLVVIQDSATASLI  
SNGGLEEWGTMAYKKHYAFAARMRLHMRTID-----

GMAPNKQKAEKIKTVKLEGDTRYRQLATEGVKEQMP-  
IHALNPDAVLIPVLVTPAVGRVAADADVLGAEVPCDYSL-  
RELQKSQKGNALPISGIRLLGMRAARAMVEEDIMVAGKVAA-  
LLVIGGLETICKLVLNMNDSEATLPWRLSVAERIAADTKRAGGYAARPFNSKPSLCKTQAHAKIADPIQEI  
AAGYIAVEERFVFPVEGIPIQLILASPHSRVGGAKRAGLGHLEMAKELIGKAVVMVLNEPGTNTTEGLL  
NYLTTGQPTDLLFEDCLDVVIDMRRMSVV-----  
VQLNTV-  
HVVVAGVRDVGSYEIMDASADSGLVQVERVDERTGRENTLMYMYGAMEELWLNSIRYADWVIDCK  
IGAILLHVYAQAINRAFSLERLQLAGWPKEASSWWNTWQLWLNKDGFFSYEAAFRALKAVLKADLYD  
FELKDVEGVGRMLSRQEVVRAGYRIREQITYEQLTPRTDILLQSATRFSIIRHALTMVAILIVREVVEFT-  
VVAKEDVAMGHVECVLADSFDTAKNADIGPVGLKTPDPVLGDGTVLKEAVLGKIDLANTVADFRYK  
MLIDGGRALGVQWISLQNMLYERIWWPPAPAALKNLQPIKFFLGHPVDL-----  
ISKARAEKLMATALIEKILAGVARFAKPEATTHQSKKLRFKYYGEEVDPVFLAYILAMFALVSTQVTVS  
DRLLKDRYVLNLAV-RGFTSLLWLSAQLGEKSPAATIISLDSIAGLGALVLFILL-RASVLVETLYYKYVY-  
-  
MLGYKAAKDVADADPEHFLVLAASRDVEWIEVIPSFFYYFKTATSRLTKNTALAREFFGLFAERLRVID  
VLVPPDRVEALVDFVALAGTLPTSAEA-  
TGVIACGFCEPNAAQVLEADQDWNLHRS LGITLAFFEARESVKGYFDKGLHKAVAEIGLSEAGALTTP  
FHAAVTAKRCVPAIHRVIDLGEMEAALIEIDSAVLVADEEQTLADQPTTRDNSVGAVGGVVLAGTMN  
MGANLDSVERGGNIIIEEEGYNAVNGKKADGKLTDKVVMVLSRAYFPVLERAASANALDKGAFDL  
LIDAPDDTENLDHGRTLIPAPSIHAESAILFAESDIERIAWIAPIHLLGTLDVAVLGFEPDQYSFISMMINA  
SLDIMETAEVLDYHVLEKGSRPPGFRVVLKGLHVRLLAGIGTIIVVGSAGRSEVTAYIQG-  
AVPITLNRVTFPLPAFAASSCYVVDIFSTMLRPPERSAIKMLILETVTEL-  
LEVTRVENDKLERMDALLPGLDVAALLPLVAAAKDFAKIVTIDRAIAAILSVAEEAVVLREMLLTAEIAV  
TALALALALLMLTRDQGLHQKESAREAQMKALIQQGGVVLQIKAADKMMLASTADKVRDLDTEGTT  
SAFASLNLATVSDGFYVLSSAVLQMSSDLMMIVAVARVLADKETKNALVVRHPEQVKQTQTYAEGSP  
GMVLQTLTGAVPPLAIKSEEVELLWTLVAALWRVKAHLANAARPHVERILILALSIAVLMQSEG-  
GSMGGGSGAPVKIIAASFILTVKAKAGDEVKRVARRVMDLNSRLGRPEEAVSPEFRGAELEQVKYAE  
NVAVDTMETIRRFVDIPFLVSTRTQHNESEDGRSMVLDVTRVRFIDL-  
VTKRSEIILAARAETDGVIAREMKSDLAALHPEAAALGKIAFLQHFIQVQDGHISNYVTAQTNSVLGML  
LLVLFINETRVAKVWWPTRREVTMVFIMATLAIFFLVIGLGVQLVFMLSGISYNQITTIVLGEGVMAVRQ  
TSTFPADS-  
IGILQNTYADLICSGRVAKADIEKSLHIVVAGRVSRGTWYVIYHYDITQAQGPSGIMQRAFRQATLSQS  
LIDGRMEVKIKVVTSDRYA-  
TYEIKGGQHRKGTRYNRVKIGHNIAVDVLPRMKMCFPPNLVLVKTFGAVVQKRFAQALHTRHGA  
VTIGPMEVSSPYIKKKARHAPGDAVVDLKP DNILRSVAVPELIWARENEDNGAVHDKYVKTTTHKL  
AAKRKKAVDKAQYDHRNQVELSFIGLAVKVLDPDKAIVHATSGTLMPTASVAVTEEMKGIAATIRLDPM  
EKSLIAYIKRMKPQLNLGGKTDKKVVKCLNNNLDDVEYGKLGRRKIPITIKSVYDVESERATELVKLMP  
YKDDVEGRKSQFAEK--  
ALFEPLKAFMMLFGYIARAIYALYLRVIRRTILLVKTIVVNANTVLSAVKIIGVSIRLRHKSTNVADTNHH  
IKTIEKRAKMTIAGAGKVKNLSPGKIGKKGRIKGFMPYNNYNIFDGLASGRRRAKVKEKAKLSVDKTI  
SVDGIRTKQQGGRTPKADLSNAIANTRVGVDIVGEEVQEESNPRANAEMGQIFAKIDARVYHHVGAL  
IGHALMAVLAVVAIWGIGRAHNLLADAFRINAGIEMHSAA-VEAAVAAA-  
FAQPGGEASVIADVSEAYLGALLISEMSVDVCRLRRRSLGELKTKKDAYMSLTCFGGKGDKVKIIEAT

QTQAYEIVATRTAERHGIRAKGSFGKERAMMQITPTKPVKIWVPVSESELLAPIRAFAETQGDGVTV  
VKLTDDVKVTMFEKAVASLAVTGKATTLIYTVLEKVTQLMKDIIYTQRAKAHYGRGRLRSHVTHTKQK  
RHLSMMKRTVVADPSMNAARLTDGEVSVVTGATMAFVMSEQDAV-  
PGDVDFHFHEEPRREADVGIGGPETFLCTEQPRVLALLFLRAYLLHIVEIETSNDFSDAATYDILRAMV  
NKLDRKLSADIAKTRMCLTDNVMDMGVTDVAARRNAAGDKILSAFWINGVTANADIILLVANLECP  
CVPENIDCAVRLFYQRTLQAKERGGDVTVQVVPAAQIEAAEGTVIYSIKGTAPGTGQMKLITIEGISR  
SIVKSLAVQLFQVDTFLDDTWIGTLLRAALDVVFGAEDSKEAVDHVIERDTELEFAPQKDIVSRKIRIFT  
PAAPSAVVIWDPAIDREDKADAQGTLKIYGPNLQDINCFTDIGAEPKIESLKAWDEKEYVVHRDDIP  
EDI-  
TLVGKSSKVNKEFAIPDVAVCAPSKPGVTESIDRGEPKAGTCGEVANMSYPQESLVNAVSSANVQKNI  
SMVLAGHPVGEMGISREIERHLETNMCEIFVDKDDVDVALDFSVIALTALRVGLDTPNARVQIDGKES  
RKLMAVLGDGEANLQRHPKVSAAATGTGLKAGTKARMDDDALIVDGVVHGDIPFTATDLPAGRV-  
VTPVVNNVKAQLEIDKVLRTFHVVTLSFSNDKGEDHLIKRLNALKKSTRHYEMLLKIRETECAESPHAI  
SVGKVLKIDKLLQTICEAHYKAIEPLMADDLTALGVMGEQGLLHIVPRLMILAVLLAATIECEFLIHSWGL  
QADAIVTDQTMGLPTRTREWSF-AISEVVSNTFFARTADDDTEQRIHARNPV-VLL-YGKFGMV-  
ISPSGLRLKSTAQTEQERGNKEDLILSTERLQDEMGYYLRIILLVFVDMVILAYGSGDEPIKFLVANQAV  
TGRQNPGMVSLTRRTFPLELQRDATFVMVFDDSTMKNLSHRKMHMNLVLVSKSGWVNVNSTKILIS  
DQAIASAEADAGAHTQPSALAIITSRVMAPIVLVVSQKPTAPSKTLFLEALALYDDVTATVLNKPCKY  
YIFEGDVSVLNTLDAAVLIGMQRPQPDRMRRAIVATAIRLAIALRAAGVVRLQNGLINFSRAVTLA  
VRVYAQITMI-----AFRVRNHDVSTKRSRPYKAHPKFLHKAIEDKSLIAEGVDITIA  
>GCA\_2517487002  
AVIKPVTMKEYAPVLMIAQSQVATVSGAGSPSLRAKTVYAKSGLQRKSETKWVAKDFYY-  
GVVKMANLVQLVSVISVDKRSVCTVAQLVDQEVVVRGMVALEAVKKKIALEAIDGMTAEDPAKVVDY  
AGEIELRKFRDADDRADMLPVLLGLTLKIKFDPHQPVVHDLPIPVVFEV-  
GIMVQRGQIEVDECAISTAVSDVDPIEYVSPIDLAAVAGDAMAYIDQESAVATAREEIGLEELALES AVL  
VVGI-PLLIPV-FAEEDGT-MSFANRSRTLRTIVNLAVSYPEIKRA-LDS-IAAAM-  
MEQSQAALAEKKGTAEEIRIVKRMQRSSGLADDPDLVMLEDAAEGNSNWAGQIYDDPISGSSESD  
SAGNIVYAANKRQNFKRSITYLRSVEISDQAAAPLMRGVKHNAKSRSRKLDDSI AALNFPNVPEGIAI  
RAEAGKTRDILLHDATEGEEILLIIVRWHVTWKTAIIGLAFLAGDVVELIAMGGIGGVGRKEGVLNRHH  
KLNGSLIEQRRVVEKLTLLRLRAALKQKLGAEQIIILVVKVAGDLVATAKIQM---  
SVGTVAIQGEVNVKRRSRQTVIGDQEATV-VLQGVAEGPADAQALLRIRVDHTVVKLSVLLIPE----  
-----  
REQFREVLQVDDITGVRLAFGHLRERLVKGGTMKELGTLL--  
IAIIQGITEPRMANLPEGVCRTFIRAGPRAAVGMLFLLLDAA-----  
-----  
IRYADVTVLTSDADLYAYAEERREVLRMVPVYIVTQAKRRQLIIFALSLRGGHRRARAALGVLIAAAILES  
QADQGGVNHEAPEVLLDDAEVVGSEMMISRQAALDLKQIIKTDIIVVFPEFQEKM-----  
MAIFVIALICTVGSMLSRDPSHAQEGGAGFQKRIRGHSVLFALAVTFDRRNLRGADGAQLFLGLGLAP  
PRYGIFYTDQPKRKQMPTEPDKDKVDGFDLVNAIKEDTASNHSLEMPEAMALAVE-  
DGTINVNAGVLALTGDMAAVEKIDSKRKMALAVEKWNISKLDLVDLSISGAQPFRALS-  
IEQADVSATLPHKAI--  
LYLPGANNAEMEEEKLDGAGASTAAAAEDKQKGILLVVPVLVVIQDSNTAGLIANGGLEEWGT MAY  
KKHYALAARMRLHMRTID-----AMEPNKQKAEKIKTVKLEGDTRFRQLATEGVKEQMP-  
LHALNPDAVLVPVLVTPAVGRVAADQDVLGARVPCDASL-

RELQKSMKGDALPISGIRLLGMRAARAMVDEDIMVAGKIAA-  
LLVIVALETITALVLRNDSEATLPWRLSVAERLEADTKRASGYAARPFKSKPSLCKTQAHARIADPIQEIA  
AGYVATEERFVFPVEGIAIQILASPHSRVGSAKRAGLGLHEMAKELQAKAVIMVLNEPGTNTTEGLLN  
YMTTQQPTDLLFEDCLDVVIDMRRMSV-----  
VQLTTI-  
HVVVSGTRDVAAYEIMAAAAHSGLVQVERVDDRTGRERTLMWMYGAMEELWLMSVTWADWVT  
DCAIGTIILHVYAQAINRAFSLTRLQLEGWPKEADRWNTWQLWLNKDGFFGYEAAFRAVA AVLKS  
ELYDYEMSDTEGVGRYQSRQELRVGYRIRQQVAYERLDPRTDILLQSLTRLSVLRHALNMVAIMIVRE  
VVVEFTLVVAQEDVAMGHVECVLADAFDFTAKNADIGPVGLRTPDSVLGDGTVLNEAVLGKIDLANT  
VADFRYKMLIDGGRRRLGVTWISVQNMPLYARIWLPPAQAALKNLVPIAFFLGHTELNLAIFPALWAGIS  
KARANKLMAGALIERILENVAADFADPEATTHQTKKARHFKYYGEEVDPVYLTYILDMFALVATQVTVS  
DRLLKDHVVLNLKIFRGFTALLWLAAQIGEKGAATITVQTIAGLGALVLFILLMRALVLVETLYYRYVY  
--MLGYKAAKDVADADPEHFLTLAASRDVEWIEVIPAFFYFDTAG-  
FEPFNTAVAKEFFGLFTERLRIVDVLLVPPDRVEALVEFVALAGTLATSAQALVGVIACGFC-----  
-----  
KDVAETGLREADALTTPFHAGQTAKQCVPVHRVLDLGELEAALIEIDSAVVVAGEEQTLADKPTTRE  
NSVGAVGGVVLGTMNMGANLESVERGGNIIIEEENYGAVNGKKADGKLTDKVLMVLSEAYFPVL  
KRMASANALDRGAFGLLIDAPDDADNRDHGRRLTIPPTVHAESAPLFAESEIERIAWIAPLHLLGTLD  
AVLGFEPDQYSFISMMIEASLDIMETAEVL-  
DYHVLETGSRPPGFRIILIKGLHIRLLAGIATIIIVGSAGRSEITAYIQ-  
GAVPITLNKKTFLPAFAASSCAVIDIFSTMLRPPPERSTIEMLILETVAEL-  
LEVTRIENDKLERLPILLPGLDVAAMLALLAAQDFANI---  
DRAITAILSVAEEAVVLRMELLALAEIAVTALALAMALLMLTPDQGLHQKELTREAQMKDLIQGGAV  
LQVKAADRMVLAATADKVRLDTDEGTTSAFASLNLATVSDGFYVLSSAVLQMSSDLMMIISVARVLA  
DKETKNALVVRHPEQVKTQTTYAEGSPGMVLQTLTGAVPPLAIKPGEVELLWTLVAALWRVKAHLAN  
ATRPHNERVLILIALSLITVLLQSEGGGMGGG--  
GPAAKALAAFSILTIIKAGDEVKVRTRRVMDLNSRLGRPEESVNPEFRGAELEQSKYEAESVEVDTME  
TIRRFVDIPFLVSIRTQHNESED RGARMVLDVTRVRFDL-  
VTKRSEIILAARAETDGIIAREMKGDLAALHPEVAALGKIAALQHFIQDAHISNYVTAEIHAVLGMLL  
LVLFIQEVRIKVVWPTRRVETMVFIMAAVALFFLVIGL--  
QVVFMLSGISWNQLTTIVLGEGIMVVRQTSTFPQDS-  
IGILQNTYADLICAGRVAKADIEGSLHIVVAGRVARGTWYVIYLYEITQAQQQSGIMQRAFRQMTLSQ  
SLIDGRMEVKIKVVTSDRYA-  
TYEIKGGQHRKGTRYNRVKVGHNIPVQVLPRMKMAFHPPNLVLVKTFGAVVQKRFAQPLTHMRHG  
AVTIGPMEVSSPYITNKKARHAPGDSVVDLKPNDIVRSVAVPELIWARENEDQGAVHDKYVKTTTHK  
LAAKRKKAVDKAQYDHRNQVELSFIGLAVKVLPEKAIHVHATAGMLMPTASVAVTDGMKGIAATIRLD  
PMEKTLIAYIKMRPQLNLAGKNDKKIVKCLNNNLDDEVYGLGRRRIKPLTIKSVYDVEHRRATELVKL  
LPYKDDVESRKSQFAEK--  
ALFEPLSAFMMMFGFIARAVYALSLRVIRRTILLVKTIVVNASTVLSAIIIGVSIRLRHKSTNVAETNHHI  
KTIEARARMTLAGTGKVKLHLREGKVGKGGRIKGYMPYKNYNIFDGLASGRRAKVKELAKLKKVDKEI  
SVDGIRQKQGGGRTPKADLSNAIANTRVGVDIVGENEQEESNPRANAEMGQIFAQIDARVYKHVGA  
LIGHALEA-----IGRAHNLLAVKVKINAGIAMHSAA-VEAAVAAA-FAQAGGEA-ALADVSEG-  
LGALLLTAMSIDVCRLRRRGLAELKTKKDAYMSLTCFSGKGDKVKLIEATQTQAYEIVATRTAERHGIR  
AKGTYGKERAMMQILPTKPVKVVVPIFVSEDELLAPIRAFAETQGDGVTVVKLTTDIKVTMFEKAVASL

AVTGKATSVVYTVLEKVTLMKDIIYTQRAKAHYGRGRLRSHVVTTKQRRHLSMMKRTVVASPSMD  
AARLTDGEVSVVTGATMAFVMSEQEAV--  
GDVDLHFHEEPRREAIEVGIGGPETFLTTEQPRVLALLFLRAYLLHIVEIETVKNKFSDAATIYDVLAMVN  
KLDRKLSADIAKTRMVLVDDLKDMGVTDVAPRREEAGDKILSAFWINGVTANADIILLVANLECPCVP  
ENIKCAIRLFYQRITLQAKERDGDVSVVAIVPAKNQIEAAEGTVIYSIKGKTPGTGQMKLTIEGISRSVVKSF  
AVQLFQVDTFLDDTWIATWLRAADDVVFVAADDGKEAVDHVVERDTELEFAPQKDIVARKIRIYTPA  
APSAVVIWDPAIEREEKAEAQGTILKIYGPNLQDINCFTDIGAEPKIESLKAWDEKEKYVVHRDDIPEDI-  
TLVGKSSRVNKEFAIPDVAVCAPSKPGVTESIDRGEPKAGTCGEVANMSYPQESLVNAVSSANVQKNI  
SMVLGGHPVGEMGVSRGVERHLETNMCEIFVDSPNVDIALDFYVLALTPLRVGLDPPNARVEIDGKE  
SRKLMAVMDGEANLQRHPKISAAPGTG-KAGTKARMPDDALILDGVMHGDISFTITDLPL-RV-  
VTPVYNTVKAQLKIDKVLKAFHVVTLSFSNNKGEEHLIKRLNALKKSTRHYEMLLKIRETECAESPHAI  
SVGKVLKIDK-----  
AVLHLARLEIALQLPHWGLQADSVITDQTMGLAVRVRHWSF-  
AISEVVGNTFFARTKEDDTEQRIHARNPV-VLL-LGKFEMI-  
ISPSGLGLKSTAESQQQRGNTDELILSPERLQDEMGYYILRILLVFVDEIILAYGSGEPIKFLVADQAVTG  
RQNPGMVTLTRRTFPLELQRDATFVMVFEDSTMKNLSHKKMHMNLVLIKSGWLNVNSTKILISDQA  
IASYAEDAGAHTQPSSESALAVITSRVMAPIVLVVSQKPTAPSKTLFLEALSLYDAVKATVLNKPKKYYIFE  
GDVVSVMGGLDAAVLLGMQRPQPDMMRRRAIAAIVRLAIALRASGIVTRLEEGLINFARSVSFAA-  
VYAE-----AFVRNHDVSTKRSPYKAHTKFLHKADVVDKGLIAAGVDTLA  
>GCA\_2521172554  
AVIKPVTQDVYAPVLMIRQTEVATVSGAGSPSLRAKTVYAKSGLQRKTSSKWVAGPFYY-  
GVVKMSNIVQLVSISVDSRAVCTVAQLVEQEVVHGLVALDAVKKKIALEAIDGMTTEDPAKVAEFE-  
EIDLKKFRDAEARADMLPVMGLTLKIKFDPHEPVVHDLPIPVIFEVL-  
GIMAERGGIEVDECAISHSVSDVDPLSYVGPIDLDAVAGTDMAFLDQEAAVSAARDVIAL--  
LAEAGILVVGI-PLILAPIFGEDGDV-MSFANRSRQLESIVDMAVAAEQLTRARIEGA--SAM-  
MTQAQAEALCEKRGTAEEIRIVKRMQRSSGLADNPVLVIMEDSAEGNSSWAGQIYDDPVSGSSES  
AGNIVHAANKRQNFARSITHLRKVEISDKSAAPLMRGVKHNSKRSRSARKVYDAIAELNFANVPEGIAIR  
AEAGKPQNTLLHDATEGEEILLIVRWGVWTWKTALIIALKH-  
AGDVVGLITLGGVGAIGRPDGLLNRRHKLNGSLIEQRPIIEKMTLKLRAALKEKLGADQIIIFVVKVEGDL  
VADATVQMG-GTVGAVVAIQGEVIFVRRHKQTVITDQESTV-  
ILRGVAEGPADAQALLRIRVTHTLVELSVLLIPE-  
PVLVDSVTIREGVGKALQIIQLDVYLLRDMGTGTETLAESGSREIREVLSVDPITGVRLAYGKLKERAGK  
KTGLKDLHT----LSIL-  
GITEPRTENLPEGICRSYIPAGPRAAVGMIFLLLEDAGKIYTIDGDLRELTKSIKSLIGLVDAKAPKVLAS  
ATERLKLRYADCSVLEGEADLYAYAEERRELLRMVPVYIINAAKRRQLIIFALSLKRGHRRRTMASLDV  
LIAAILESQAEMGTVHHEEPAILLEDAEIVGSAIMISRQSALDLKARFKMDVIVVFPEFQEKMVVSLKFFCT  
EVAIFVIALIVTVGEMLSREPEHAQEEGAGFQKRIRGHSVLFALNVTLDRRNRDA-  
TPDLFLALGLASPRYGIFYVNQPKKKQMPSEPDGDREDGFELVHAIKDDGGS-EELEMPAMALAVE-  
NEPINVSGGVLALKGGMAAVEKVESKRKMSLAAEKWNISKLSLLDVRISGAAAIRCAG-  
IEQADLSAALAAKKV-  
SLFLPGASNAELEEELAGAGASTADAAADKQARILVLPVLPVVIQDSNTASLIANGGVFEWGTMAYK  
KHYAFAARMRLHMRTID-----VMAPNKQKSEIKTVKLEGDTRFRQLATDGVKEQMP-  
LHALNPDFAVLVQILVTPAVGLVAADESVLGAEVPCSFSL-  
RELQKSQKGSALPISGIRLLPMRTARAMIDEDIMVAGKVAA-

LLKISALETVIHIILRNDSEATVPWRLSVAERLEADTKRSSGYAARPFMSKPSLCDTQAHHNVADPIQEI  
AAGYVASEDRFVFPVEGIAIQLILSSPHSRVGEEKRAGEGHLHGMAKELFARAVLMLKNEPETNTEGLL  
NYLTNNQPTDLLFEDCLDVIIDMRRMSVV-----  
IQLNTI-  
HVWVPGVRDVGNFEIMTAAAASGLVQEERVDDRTGRERTMMWMMYGAMEELWLNLSLKWAGWVV  
NCAIGAILHVYAQSINRAFSKRLQLQGWPLEADRWVNTWQLWLNKDGFFGYEAAFRALKQVLKS  
TLFGFDMTNIEGVGRMQSRQQIRVGYRIREQVDFARLDPRTDILLQAQTRLSVIRHALEVVAILLRDV  
VGEFTLVVAMEDVAKGHVECVLADSFDTAKDADIGPVGLRDPDSIFGDGTVLKEAVLGKIDLANTIA  
DFRYLVITDGGRELGVKVVLTLENMIYERIWLPQAQAALKNLQPICFFLSHPELDL-----  
ISKARAERLMAGALVEEILEGVARFAEPEATTHQSNKERHFKEYGEEVDPVHLAYILETFALVATQVTVS  
DRLLKDRYVLNLRVFRGFTSLLWLAVQLASKGPASTIITLGTIAGLGALVFIILL-RDNVLVETLFYRYVY-  
VMRGYTAAKDVADADPEHLLALAAASRDMEWIEIVPAFFYYFKTATKNLKKNTAVAREFFGLFEERL--  
-  
AVLAVPPDRVLELVELVALAGTLVTSAEALSGVIACGLCEPNAAGVLEADQDWNLHRTMGITLAFKKA  
QQSVNGYFDKGLHKDVATTGLRDAGGFTTMNLCEVEAKQCCPAVHRVVDLGEVEAALLEINSAVLV  
ADEEQTLADKPTRDKAVGAVGGVVLGATMMNMGGALEQVDRSQNIVIELEEEQYNAVNGKKSOGK  
LTDKVLNV-----  
FPVLRRTSSGNALDQGVFDLVEAPEDADNQDHARELVIPAPTIHTETTPLYAESDIDRIAWIAPMHM  
LGTLPVVGFEVDHYSFISMMIEASLDITETAELDDYNVLEKGRPPGFRKILIKGLHIRLLAAVGTILVV  
GSAGRSEITAYIQDRAVPISLSRKTFLPAFAASSCEVVDIMSTLLRPPERSAVEMLIETVTEL-  
LEVTRLENDKLERLLILLPGLDTSSELLNLVAAAKDFSAIVTIDAAITAILSVAEEAVVRELLLTKEAIAVTAL  
AFAIALLLMLTADQGLTLKDHARERQMKDLIQGGAVLQVHARDAMVLAATADKVRLETDEGTTSF  
ASLNLATVSDGFYVLSSAVLQMSADLMMIVAVARVLADKETKNALVVRHPEQVKTQPTYAEGSPGM  
VLQTLTECIPPLAIKPEEVELLWTLVKALWKVKAHLASAARPRLERVLVLLLSLIAVLLQSEGGGMGG  
G-  
VGAAAKFLAAFSILTİKASAGDEVKVRTRVMDLNSRLGRPEEAVNPEFRGEELEQTKYEAENVEVDCT  
ETIRRFVDIPFLVSTRTQHNESEDGRSRLVLDVTRVRFIDLDVTKRSQIILVERVETDGVIAREMAKDMQ  
SLQPE-  
AALGKIAALEHFISLQDGHISNYVTAEINSVLGMLLLVLFIQQVVRTAKIVWPTRREVTMVFIMAALAVFF  
IVIGLG-NLVFMLGGISPIQITTLVLGEGVMVVRQTSTFPAEA-  
VTILQNTYADLICAGRVTKADIESSLHIVVGARVARGTWYVIYHYEITQAQGESGIMQRAFRQATLSQS  
LIDGRMEVKIKVVTSDRYA-  
TYEIKGGQHRKGTRYNRVKVGHNIPVDVIPRMKMAFTPPNLVLVKTFGAVVQKRFAQPLTHVRHGA  
VTIGPMEVSSPYITQKKARHAPGDSVVEIKPENIVRSVAVPELIWAREHEDNSAVHEKYVKTTHKIAA  
KRNSAVDKAQYDKRNQVHLSFIGLAVKVLDPQAIVAATAGTLLPTATTTVTEGLKGVAATIRLDPMEK  
ALIAYIKMRPQLNLGGKVDNKIVKCLNNNLDDEYGKLGRRKIKPLTIKSVYDVEHKRATELVKIMPYK  
DDVESRKSQFAEKELALFEPLKAFMMVFGFIARSVYALYLRVIRRTILLVKTIVVNADSVLSAIIIGVSIR  
LRHKSTNVAGTKHHIKTIEKRARMTLAGAPSVKLHLSPGRVGKKGRIKGYMPYKNYNIFDGLASGRR  
NKVKDLAKLKKLDKTISVDGIRVRQ-  
GGRVPKAALSNAFANSRVGVDIVGENIQEESNPRANAEMGQLFAEIDARVYHLVGALVGHAEAVL  
AVCAILGIGKAHALLAVKLKINAGIEFHTAA-VEEAVAAA-  
YAEPAGEAAVLLDVSEYPLGDLALTQASLDVCRMRRRQLGELKKTKEAYMKLTCFSGKGDKVKILEC  
TQTQAYEIVATRTAERHGİKAKGSFGKERAMMQIVPTKPVKVVVPVFSDDDELLAPVRALAETCGDG  
VDVVKLTTDVKVTMFEKAVASLSMAGKATTIVYTVLEKVTLSKDIIYEQRAKAHYGRGRLRSHVTHS



KQKRHLSMMKRTVVSSPSVSAARLTDGEVTVITGATMAFVMSEQDAV--  
GEVDMHFHEEPRREAVLGIAGPETFLSTEQPRLLALLFLREYLMHIVDIGTTGNFSDAATYDILRALQN  
KLDRKLSADIAKVRMCLHDDVVKMGGVTSEAPRRDAAGDSILSAFWINGVTANSDIILLVANLECETAP  
ENIDCAVRLFYQRVTLQAKERGGDVSVLIPAQNQIEAAEGTEIYTIKGSTPGTAQMKLNVEAISRSIVK  
SLAVQLYQVDLFTNDTWIATMLRAAQTVVYVGAADGKEAVDHVIERDTELEFAPQKDIVRRKIRVFTP  
AAPSAVVIWDPADRADKADAQGTILKIYGPDLQDIACFTDIGAEPKIESLASWDEKEKYVVHRDDIPE  
DI-  
TLVGKSSKVNKEFGIPDVAVCAPSKPGVTESIDRGEPKAGSCGEVANLPYPQDSLVRVSSANVQKNI  
SMVLGGHPVGEMGISREVERHLETSMCEIFVDKDDVDVALDFYKISLTPLRVGIDRPNKVEIAGKESR  
KLMAVLGDGADLQRHPKVSDAAGIG-KAGAKALPEDALVRDGVQHGDIETSTDLEPEGRV-  
VTPVFNNVKAQLQIDKVMRTFHVVTLSFSNDKGDEHLIKLRLNALKKSTRHYDMLLKIRDTECAQSP  
HAIPVGKILKIDRLLQTICQAHYTAVEPLLADDLTALGVMGDQGLLHVPRMLAVLYLWSVEAIDHF  
PLWDLQEAGLITDQTLGLNVRSEWSF-CISEVVGNTFFARTKDDDEQRLYARNPI-VLL-  
YGKFDMI-  
ISPSGLRLESTAIQDQGHGNQDKLILSTERLQDSMAYYVLEILLVFADMMILAWGSGDEPLKFLVAEQA  
ITGRDNPQLVCLTRRTFPLDLQRDATFVLVEDATMKNLSHKKMHMNLVLVKSkgwVENVSTKILISD  
QAIASYAEDAGAHTQPSALAVITSRVMAPIVLVVSQKPTAPSKTMFLEALSLEAVTATVLNPKPKY  
YIFEGDVIAVLGSIDAAVLIGMQRPQPDMMRAVVAAAIRLAIALRGSDAISELEAGKINFSRAVSFVAA  
TYKQLNPLMRAAIKLEAVDFVRNHNKVNTRKRPYKGHTKFLHKADEEKSLIAEGVDTIA  
>Yoonia sp. 67-2  
AVIRPVVMKVYAPVLMIAQSQVATVSGAGSPSLRAKTVYAKSGLQRKSETKWVVKDFYY-  
GVVKLGNLVQLVSISVDNRAVCTVAQLVEQEVVHGMVALDAVKKKIALEAIDGMTAEDPAKVIDY  
NSELDLRKFRDADDRADMLPILLGLTLKIRFDPHQPLVHDLPIPVIFEVV-  
GIMVQRTGIEVDECAISTAISDVPDIVVSPIDLAAVSGDKMAYIDQESAVSAAKADIAL--  
LALES AVL VVG I-PLLIPV-FAADADV-MSFANRSRTLKTIVNLAVSYPTVKRA-----IAAAL-  
MEASQAAALAEKRGTAEQIRIVKRMQRSAGLADDPDLVLLEDAAEGNSNWAGQIYDDQLSGSSES  
SAGNIVFAANKRQNFQRSITYLRKVEIADQAAAPLMRGVKHNAKSRSARKLDDAIAALNFPNVPEGIA  
IRAAAGKPTELLHDATEGEEILMIIVRWKVTWKTAIISLFT-  
AGDVVGLIELGGIGAVGRKDGLLNRRHHKMNGALIEQRRIVEKLT LRLRAALKQKIGAEQIIIFVVKVAGD  
LVAKAKVQM---  
SIGAVVAIQGETVFKRRGRQTVIGDEDATVEVLRGVAEGPADAQALLRIRVDHTLVKLSVLLIPE-  
PVLVESVSIREGVGKALQIIQLDVYLLRDMGTGEETLAKSKSREMIREILQVDPITGVRLAFGELRERLVK  
GGTMKELGTLL--  
LAILTGITEPRMANLPAGVCRTFINAGPRAAVGMIFLLDDAGKIYIDGDLREITKSIKSLIGLVDAKPK  
IMSAGYAAARLQVRYADVMDVLVSDANLYAYAEERRELLRMVPVYITNAAARRQLIIFALSRLRGGHRRA  
RAAIGVLIAAAILESQAEQGPVNHADPQVLLDDGEIVGSEMMISRQAALDLKQLIKTDVIVIFPEFQEK  
MVVSLKFFCTDVAIFVIALICTVGAMLSREPSSAQESGAGFQKRIRAHSVLFALAVTFDRRNLRTS-V-  
DLFLGLGLAAPRYGVLYTEQPKRKQMPTEPDKDKVDGFDLVNAIKEDTASNHELEMPEAMALAVE-  
DASINVTAGVLAMNGDMAAMEKVDSKRKMALAVEKWTIGAKAIVDIIISGAAPFRACD-  
VEVADVSAGLPTKSI-  
FLYLAGANNAELEEELDGGAGASTAEAAADKQKGILLVVPVLVVIQDSNTAALITNGGLEEWGTMAY  
KKHYALAARMRLHMRTID-----QMEPNKQKAEIKTVKLEGDTRFRQLATEGVKEQMP-  
LHALNPDFAV-LPVLVTPAVGRVAADEQVLGARVPCDASL-  
RELQKSMGTGNALPISGIRLLGMRAARAMVDEDIMVAGKVAA-

LLVIGSLETITHLVLRNDSEATLPWRLSVAERLES DTKRAGGYAARPFKSKPSLCNTQAHAKIADPIQEIA  
AGYVATEARFVFPVEGIPIQLILASPHSRVGA AKRAGLGHLEMAKELQAKAVIMVLNEPGTNTDGLL  
NYLTTHQPTDLLFEDCLDIVIDMRRMSVV-----  
VQLNTV-  
HVVVAGTRDVGDYEIMAAAAPSGLVQVERVDDRTGRERTLMWWMYGAMEELWLLSVTYADWVVN  
CAIGAILLHVYAQVINRAFSLDRLQLAGWPKQAARWWNTWQLWLNKDGFFSYEAAFRVLAVLSA  
DLDDYEMSDVEGVGRHLSRQELRVGYRIREQVAFEQLDPRTDILLQSRTRLSVIRHALKMVAILIVREIV  
AEFTLVVAKEDVAMGHVECVLAESDFTAKDADIGPVGIRTPDLILGDGTVFNEAVLGKIDLANTVADF  
RYKMLADGGRELGVSWITLQNM LYARIWLPPAQAALKNLVPVAFFLGHTELNLIPFPALWAGISKARA  
QKLMAGALIEKILAKVAAFADPEATTHQSKKAPHFKY GEEVDPVYLAYILEIFALVATQVTVSDRLLTD  
RYVLNLKI-RGFTSLLWLSAQIAEKGPSATVITVDTIMGLGALVLFILL-RASVLIELTYRYVYV-  
MLGYQAAKDVADADPEHFLSLAHASRDVEYIEVIPAFFYFYTAT-  
FEPFNTALAREFFGLFEERLRIIEVLAVPPDRVEALVEFVALAGTLPTSADAAPGVIACGFCEPNAAGVLE  
ADQDWNLHRHMGITLAFFKAQVSVHGWFDKGLHKDVAATGLSEAGALTTPFHA EVTAKQCVPVAV  
HRVLDLGEVEAALIEIDSAVLVADEEQTLADKPTTRENSVGAVGGVVLAGTMNMGANLDSVERGNN  
IIIELEENYSAVNGKKGDGKITDKVLMVLSEAYFVLRMMASANALDKGRFGLLIDAPDDADNQDHG  
GSLTIPAPTVLSESAPLFAESEIERIAWIAPIHLLGTDAVLGFEPDQYSFISMMIDASLDIMETA EVLDDY  
HVLEKGSRRPGFRVILIKGLHIRLLAGICTIIVVGSAGRAEITAYIQG-  
AVPITLNKKTFLPAFAASSCH AIDIFSTMLRPPERSTIMTLILETVTEL-  
LEVTRLENDKLERLETLPLGLDIAELLSLLAAATDFTAIVTIDRAITAILSVAAEAVVLREMLLT LAEIAVTAL  
ALALALLMLTKDQGLHQKEHAREAQMKDLIQGGVVLQVKAARMMLASTADKVR LDTDEGTTSA  
FASLNLATVSDGFYVLS SSVLQMSSDLMMIIVARVLADKETKNALVVRHPEQVKTQSTYAEGSPGM  
VLQTLTGAIPPLAIKPEEV ELLWTLVAALWQVKAHLANAARPHNERVLILALSLITVLLQSEGGGMGG  
--  
TNPPAKMLAAFSILT IKAKAGDEV RKVTRRVMDLNSRLGRPEESVNPEFRGAELEQSKYE AENVEVDT  
METIRRFVDIPFLVSIRTQHNESEDRGARMVLDVTRIRFIDL-  
VTCKSEIILAARAETDGIIAREMGKDLAALHPEAAALGKIAALQHFAIQDAHISNYVTADIHAVLGMLLL  
VLFIQEV RVAKVWPTRREV TMVFILAALAVFFLVIGLGVQIVFMLS GISWNA LTTIVLGEGIMVVRQTS  
TFPEDS-  
IGILQNTFAELICAGRVAKADIENSLHIVVAGRVARGTWYVIYLYEISQAQGGSGIMQRAFRQMTLSQ  
SLIDGRMEVKIKVVTSDRYA-  
TYEIKGGQHRKGTRYNRVKVGHNIPVQVLPRMKMMFTPPNLVLVKTFGAVVQKRFAQAL THIRHGA  
VTIGPMEVSSPYIQNK KARHAPGDAVVDLKP DNIVRSVAVVPELIWARENEDQGAVHDKYVKTTHKL  
AAKRKKAVDKAQYDHRNQVELSFIGLAVKVLPEQAIVHATSGQLMPTASVAVTEGMKGIAATIRLDP  
MEKALIALIKRMRPQLNLAGKQDKKIVKCLNNNLDDVEYGKLGRRKIKPLTIKSVYDVDSRRATELVKL  
MPYKDDVESRKSQFAEK--  
ALFEPLKAFMMMF GFIA RAVYALYLRVIRRTILLAKTKIVVNADSVLSAIIIGVSIRLRHKSTNVAETNHH  
IKTIEKRARMTLAGAGKV KLNLSPGKIGMKGGRIKGYMPYKNFNIFDGLASGRRAKVQDLAKLKD VDK  
TIAVEGIRQKQGGRTPKAQLSNAI-  
NTRVGVDIVGENEQDES NPRANAEMGQIFAKIDARVYSHVGALIGHALEAVLAIVAIWGIGRAHSILA  
VRLHINAGIEMHSAA-VEVAVAAA-  
FAENAGEASLVTDVSEGP GPTLLVTATSV DVCRLRRRSLAELKKTCKDAYMSLTCFSGKGDKVKIVEAS  
QTQAYEIVATRTAERHGIRAKGTYGKERAMMQILPTKPVKIWWPVFVSEEELLAPIRAFAETQGDGVTV  
VKLSTDIKVTMFEKAVASLAVSGKATTVVYTVLEKVTELMKDIIYTQRAKAHYGRGLRSHVVT TTKQR

RHLSMIKRTVVADPSMDAARLTDGEVSVITGATMAFVMSEQEAV--  
GDVDLHFHEEPRREVAFGIAGPETFLTTEQPRLLAVLFLREYLLHIVEIGTTNGFADAATIYDVL RAMVY  
KLDRKLSADIAKTRMVLVDDLMDMGVTEVAPRREAAGDKILSAYWINGVTANADIVLLVANLEPCPV  
PENIDCAIRLFYQRITLQAKERGGDVSVAVVAANKQIEAAEDTVIYTIKGTKPGTAQMKLTIEGSRSVV  
KSFAVQLFQIDTFLDDTWIATWLRAADDVVFVAAEDGKEAVDHSVVERDTEVEFAPQKDIVSRKIRIYT  
PAAPSAVVIWDPAIDRADKAEAQGTILKIYGPNLQDINCFTDIGAEPKIESLKAWDEKEKYVVHRDDIP  
EDIDTLVGKSSKVNKEFAIPDVAVCAPSKPGVTESIDRGEPKAGTCGEVANMAYPQESLVNAVSSANV  
QKNISMVLAGHPVGEMGISREIERHLETNMCEIFVDKADVDVALDFYTLALTPLRVGLDPPNARVQID  
GKESRKLMVQDGDAAALQRHPKVSAATGTGLGAGVKARMPDDALILDGVVHGALSFTATDLPAG-

-----  
KLRLNALKKNTRHYEMLLKIRETECAESPHAISVGKVLKIDKLLQTICVAHYKEIEPLLADDLTALGVMGR  
QGLLHVVPRLMILAVLHLLS-ACAIIMPRWDLQKDAITDQTMGLAVRERIWSY-  
AISEVVGNTFFARTKEDDTEQRIHARNPV-VLL-LGKFVMI-  
ISPSGLGLVSTAISEQELGNHEPLILSPERLQDEMGYIIAILLVFVDQVILAYGSGNEPIKFLVADQAVTG  
KQNPGMVTLTRRTFPLELQRDATFVMVFEDSTMKNLSHKMHMNLILIKSRGWLVNVSTKILISDQAI  
ASYAEDAGAHTQPSESALAAITSRVMAPIVLVVSQKPTAPSKSLFLEALALYDEVTATVLNKPKEYFIFE  
GDVVSILGDVDAAVLLGMQRPQPDAMRRAVVAAAIRLAIASLASGVVTRLEEGLINFSRAVSLAAGIY  
GELDLPAVAIIE-PTIAFRVRNHDVSTKRSKPYKAHTKFLHKADVDKSLIAEGVDTLA

>Yoonia sp. 67

AVIRPVVMKVYAPVLMIAQSQVATVSGAGSPSLRAKTVYAKSGLQRKSETKWVVKDFYY-  
GVVKLGNLVQLVSISVDNRAVCTVAQLVEQEVVHGMVALDAVKKKIALEAIDGMTAEDPAKVIDY  
NSELDLRKFRDADDRADMLPILLGLTLKIRFDPHQPLVHDLPIPVIFEVV-  
GIMVQRGTEIYDECAISTAISDVDPVIVVSPIDLAAVSGDKMAYIDQESAVSAAKADIAL--  
LALES AVL VVGI-PLLIPV-FAADADV-MSFANRSRTLKTIVNLAVSYPTVKRA-----IAAAL-  
MEASQAAALAEKRGTAEQIRIVKRMQRSAGLADDPDLVLLEDAAEGNSNWAGQIYDDQLSGSSES  
SAGNIVFAANKRQNFQRSITYLRKVEIADQAAAPLMRGVKHNAKRSARKLDDAIAALNFPNVPEGIA  
IRAAAGKPTELLHDATEGEEILMIIVRWKV TWKT AIIISLFT-  
AGDVVGLIELGGIGAVGRKDGLLNRRHHKMNGALIEQRRIVEKLT LRLRAALKQKIGAEQIIIFVVKVAGD  
LVAKAKVQM---  
SIGAVVAIQGETVFKRRGRQTVIGDEDATVEVLRGVAEGPADAQALLRIRVDHTLVKLSVLLIPE-  
PVLVESVSIREGVGKALQIIQLDVYLLRDMGTGEETLAKSKSREMIREILQVDPITGVRLAFGELRERLVK  
GGTMKELGTLL--  
LAILTGITEPRMANLPAGVCRTFINAGPRAAVGMIFLLDDAGKIYTIDGDLREITKSIKSLIGLVDAAPK  
IMSAGYAAARLQVRYADVMVLVSDANLYAYAEERRELLRMVPVYITNAAARRQLIIFALSRLRGHRRRA  
RAAIGVLIAAAILESQAEQGPVNHADPQVLLDDGEIVGSEMMISRQAALDLKQLIKTDVIVIFPEFQEK  
MVVSLKFFCTDVAIFVIALICTVGAMLSREPSSAQESGAGFQKRIRAHSVLFALAVTFDRRLRSTS-V-  
DLFLGLGLAAPRYGVLYTEQPKRKQMPTEPDKDKVDGFDLVNAIKEDTASNHELEMPEAMALAVE-  
DASINVTAGVLAMNGDMAAMEKVDSKRKMALAVEKWTIGAKAIVDIIISGAAPFRACD-  
VEVADVSAGLPTKSI-  
FLYLAGANNAELEEELDGAGASTAEAAADKQKGILLVVPVLVVIQDSNTAALITNGGLEEWGT MAY  
KKHYALAARMRLHMRTID-----QMEPNKQKAEKI KTVKLEGDTRFRQLATEGVKEQMP-  
LHALNPDAFV-LPVLVTPAVGRVAADEQVLGARVPCDASL-  
RELQKSMTGNALPISGIRLLGMRAARAMVDEDIMVAGKVAA-  
LLVIGSLETITHLVLRNDSEATLPWRLSVAERLES DTKRAGGYAARPFKSKPSLCNTQAHAKIADPIQEIA

AGYVATEARFVFPVEGIPIQLILASPHSRVGAACKRAGLGHLHEMAKELQAKAVIMVLNEPGTNTDGLL  
NYLTTHQPTDLLFEDCLDIVDMRRMSVV-----  
VQLNTV-  
HVWVAGTRDVGDYEIMAAAAPSGLVQVERVDDRTGRERTLMWMYGAMEELWLLSVTYADWVVN  
CAIGAILLHVYAQVINRAFSLDRLQLAGWPKQAARWWNTWQLWLNKDGFFSYEAAFRVLAVLSA  
DLDDYEMSDVEGVGRHLSRQELRVGYRIREQVAFEQLDPRTDILLQSRTL SVIRHALKMVAILIVREIV  
AEFTLVAKEDVAMGHVECVLAESFDTAKDADIGPVGIRTPDLILGDGTVFNEAVLGKIDLANTVADF  
RYKMLADGGRELGVSWITLQNMLYARIWLPPAQAALKNLVPVAFFLGHTELNLPFPALWAGISKARA  
QKLMAGALIEKILAKVAAFADPEATTHQSKKAPHFKYYGEEVDPVYLAYILEIFALVATQVTVSDRLLTD  
RYVLNLKI-RGFTSLLWLSAQIAEKGPSATVITVDTIMGLGALVFIILL-RASVLIETLYRYVYV-  
MLGYQAAKDVAADAPHEFLSLAHASRDVEYIEVIPAFFYFYTAT-  
FEPFNTALAREFFGLFEERLRIIEVLAVPPDRVEALVEFVALAGTLPTSADAAPGVIACGFCEPNAAGVLE  
ADQDWNLHRHMGITLAFFKAQVSVHGWFDKGLHKDVAATGLSEAGALTTPFHA EVTAKQCVPAV  
HRVLDLGEVEAALIEIDSAVLVADEEQTADKPTTREN SVGAVGGVVLAGTMNMGANLDSVERGNN  
IIIELEENYSAVNGKKGDGKITDKVLMVLSEAYFPVLRMMASANALDKGRFGLLIDAPDDADNQDHG  
GSLTIPAPTVLSEAPLFAESEIERIAWIAPIHLLGTDAVLGFEPDQYSFISMMIDASLDIMETA EVLDDY  
HVLEKGSRRPPGFRVILIKGLHIRLLAGICTIIVVGSAGRAEITAYIQG-  
AVPITLNKKTFLPAFAASSCH AIDIFSTMLRPPERSTIMTLILETVTEL-  
LEVTRLENDKLERLETLLPGLDIAELLSLLAAATDFTAIVTIDRAITAILSVAAEAVVLREMLLTAEIAVTAL  
ALALALLMLTKDQGLHQKEHAREAQMKDLIQGGVVLQVKAARMMLASTADKVRLDTDEGTTSA  
FASLNLATVSDGFYVLSSSVLQMSSDLMMIIVARVLADKETKNALVVRHPEQVKTQSTYAE GSPGM  
VLQTLTGAIPPLAIKPEEVELLWTLVAALWQVKAHLANAARPHNERVLILALSLITVLLQSEGGGMGG  
--  
TNPPAKMLA AFSILT IKAKAGDEV RKVTRRVMDLNSRLGRPEESVNPEFRGAELEQSKYE AENVEVDT  
METIRRFVDIPFLVSIRTQHNESEDRGARMVLDVTRIRFIDL-  
VTKKSEIILAAARETDGIIAREMGKDLAALHPEAAALGKIAALQHFAIQDAHISNYVTADIHAVLGMLLL  
VLFIQEV RVAKVWWPTRREVTMVFI LAALAVFFLVIGLGVQIVFMLS GISWNA LTTIVLGEGIMVVRQTS  
TFPEDS-  
IGILQNTFAELICAGRVAKADIENSLHIVVAGRVARGTWYVIYLYEISQAQGGQSGIMQRAFRQMTLSQ  
SLIDGRMEVKIKVVTSDRYA-  
TYEIKGGQHRKGTRYNRVKVGHNIPVQVLPRMKMMFTPPNLVLVKTFGAVVQKRFAQAL THIRHGA  
VTIGPMEVSSPYIQNKARHAPGD AVVDLKP DNIVRSVAVVPELIWARENEDQGAVHDKYVKTTHKL  
AAKRKKAVDKAQYDHRNQVELSFIGLAVKVLPEQAIVHATSGQLMPTASVAVTEGMKGIAATIRLDP  
MEKALIALIKRMRPQLNLAGKQDKKIVKCLNNNLDDVEYGLGRRKIKPLTIKSVYDVDSRRATELVKL  
MPYKDDVESRKSQFAK--  
ALFEPLKAFMMMFGFIARAVYALYLRVIRRTILLAKTKIVVNADSVLSAIKIGVSIRLRHKSTNVAETNHH  
IKTIEKRARMTLAGAGKVKLNLSPGKIGMKGGRIKGYMPYKNFNIFDGLASGRRAKVQDLAKLKD VDK  
TIAVEGIRQKQGGGRTPKAQLSNAI-  
NTRVGVDIVGENEQDESNPRANAEMGQIFAKIDARVYSHVGALIGHALEAVLAIVAIWGIGRAHSILA  
VRLHINAGIEMHSA-VEVAVAAA-  
FAENAGEASLVTDVSEPGPTLLVTATSVDVCRLRRRSLAELKTKKDAYMSLTCFSGKGDKVKIVEAS  
QTQAYEIVATRTAERHGIRAKGTYGKERAMMQILPTKPKIWWPVFVSEELLAPIRAFAETQGDGVTV  
VKLSTDIKVTMFEKAVASLAVSGKATTVVYTVLEKVTELMKDIIYTQRAKAHYGRRLRSHVVT TTKQR  
RHLSMIKRTVVADPSMDAARLTDGEVSVITGATMAFVMSEQEAV--

GDVDLHFHEEPRREVAFGIAGPETFLTTEQPRLLAVLFLREYLLHIVEIGTTNGFADAATIYDVL RAMVY  
KLDRLKSADIAKTRMVLVDDLMDMGVTEVAPRREAAGDKILSAYWINGVTANADIVLLVANLECPV  
PENIDCAIRLFYQIRITLQAKERGGDVSVAVVAANKQIEAAEDTVIYTIKGKTPGTAQMKLTIEGSRSV  
KSAFVQLFQIDTFLDDTWIATWLRAADDVVFVAAEDGKEAVDHVVERDTEVEFAPQKDIVSRKIRIYT  
PAAPSAVVIWDPAIDRADKAEAQGTILKIYGPNLQDINCFTDIGAEPKIESLKAWDEKEYVVRDDIP  
EDIDTLVGKSSKVNKEFAIPDVAVCAPSKPGVTESIDRGEPKAGTCGEVANMAYPQESLVNAVSSANV  
QKNISMVLAGHPVGEMGISREIERHLETNMCEIFVDKADVDVALDFYTLALTPLRVGLDPPNARVQID  
GKESRKLMAVQDGDAAALQRHPKVSAATGTGLGAGVKARMPDDALILDGVVHGALSFTATDLPAGR  
V-

VTPVFNTVKAQLKIDKVLLKAFHVVTLSFSNNKGEEHLIKRLNALKNTRHYEMLLKIRETECAESPHAI  
SVGKVLKIDKLLQTICVAHYKEIEPLLADDLTALGVMGRQGLLHVVPRLMILAVLHLLS-  
ACAIIIMPRWDLQKDAITDQTMGLAVRERIWSY-AISEVVGNTFFARTKEDDTEQRIHARNPV-VLL-  
LGKFVMI-

ISPSGLGLVSTAISEQELGNHEPLILSPERLQDEMGGYIIAILLVFVDQVILAYGSGNEPIKFLVADQAVTG  
KQNPGMVTLTRRTFPLELQRDATFVMVFEDSTMKNLSHKMHMNLILIKSRGWLVNVSTKILISDQAI  
ASYAEDAGAHTQPSESALAAITSRVMAPIVLVVSQKPTAPSKSLFLEALALYDEVATVNLNPKKYFIFE  
GDVVSILGDVDAAVLLGMQRPQPDAMRRAVVAAAIRLAIASLASGVVTRLEEGLINFSRAVSLAAGIY  
GELDLPAVAIIE-PTIAFRVRNHDVSTKRSKPYKAHTKFLHKADVDKSLIAEGVDTLA

>Yoonia sp. 72

AVIRPVTMKTYAPVLMIAQSQVATVSGAGSPSLRAKTVYAKSGLQRKSETKRVVKDFYY-  
GVVKLGNLVQLVSISVDNRAVCTVAQLVEQEVVHGMVALDAVKKKIALEAITGMTAEDPAKVVDY  
ASEDLRKFRDADDRADMLPILLGLTLKIRFDPHQPLVHDLPIPVVFEVV-  
GIMVQRGTIEVDECAISTAISDVDPVIVVSPIDLAAVSGDKMAYIDQESAVSAAKADIAL--  
LALES AVL VGI-PLLIPV-FAADADV-MSFANRSRTLKTIVNLAVSYPTIKRA-IDG-IAASL-  
MEASQAAALAEKRGTAEQIRIVKRMQRSAGLADDPELVLEDAAEGNSNWAGQIYDDPLSGSSED  
SAGNIVYAANKRQNFQRSITFLRKVEISDQAAAPLMRGVKHNAKSRSARKVDDTIAALNFPNVPEGIA  
IRAAAGSQVHLLHDATEGEEILMIIVRWHTWKTAAIISLFT-  
AGDIVGLIELGGIGAVGRKEGLNRHHKMNGALIEQRRIVEKLT LRLRAALKQKIGAEQIIIFVVKVAGDL  
VAKAKIQM---

SVGAVVAIQGETIYVRRHRQTVAIEDATVEVLRGVAEGPADAQALLRIRVDHVLVKL SVLLIPE-  
PVLVESVSIREGVGKALQIIQLDVYLLRDMGTGEETLAKSRREMIREILQVDPITGVRLAFGILRERLVKG  
GTMKELGTL---

LAIIKGITEPRMANLPDGVCRFINAGPRAAVGMIFLLDDAGKIYTIDGDLRELTKSIKSLIGLVDAAPK  
IMSAAYAAARLKVRYADVTVLVSDANLYAYAEERRELLRMVPVYITNAAARRQLIFALSRLGGHRRAR  
AAIGVLIAAAILESQAEQGAVNHASPAVLLDDGEIVGSEMMISRQAALDLKQIIKTDVIVIFPEFQEKMV  
VSLKFFCTDVAIFVIALICTVGAMLSREPSSAQEDGAGFLKRIRAHSVLFALVATFDRRNLRTS-A-  
NLFMALGLAPPRYGVLYTEQPKRKQMPSEPDADEVDGFDLVHAIKEDTASNHELDMPPEAMALAVE-  
DATINVTAGVLAMTGDMAAMEKVDSKRKMALAVTKWTISAEIIVDILISGAHPFRALD-  
IETADVSAGMPRKNI--

LYLPGANNAEMEEELDGGAGASTAEAAADKQKGILMVVPVLVVIQDSNTAALIANGGLEEWGT MAY  
KKHYALAARMRLHMRTID-----QMEPNKQKAEIKTVKLEGDTRFRQLATEGVKEQMP-  
LHALNPDAFV-LPVLVTPAVGRVAADEQVLGARVPCDASL-  
RELQKSMG DALPISGIRLLGMRAARAMVDEDIMVAGKVAA-  
LLVILALETITHLVLRNDSEATLPWRLSVAERLEADMKRASGYAARPFQSKPSLCNTQAHAKIADPIQEI

AAGYVATEARFVFPVEGIPIQLILASPHSRVGS AKRAGLGHLEMAKELHAKAVIMVLNEPDTNTDGL  
LNYLTTQQPTDLLFEDCLDIVIDMRRMNVV-----  
VQLNTV-  
HIVIPGARELG DREIMAAAAPSGLVQTERVDDRTGRERTLMW MYGAMEELWLLSVTYADWV VNCAL  
GAILLHVYAQVINRAFSLDRLQLAGWP REASRW WNTWQLWLNKDGFFGYDAAFR AVLAVLSADLD  
DYEMSDVEGVGRHLSRQQRLVGYRIREQVAFEQLDPRTDILLQSRTRLSVIRHALAMVAILIVREIVVEF  
TLVVAKEDVAMGHVECVLADSFDTAKDADIGPVGIRTPDTV LGDGT VFN EAVLGKIDFANTVADFR  
YKMLADGGRDLGVS WITLQNMLYARIWLPPAQAALKNLVPISFFLGHTELNLAIFPALWAGISKARAQ  
KLMAGALIEKILANVA AFADPEATTHQSKKAPHFKYYGEEVDPVYLAYILDIFALVATQVTVSDRLLTD  
HYVLNLKI-RGFTSLLWLSAQIADKGPAATVITVDTIMGLGALVLFILL-RASVLIETLYRYVYV-  
MLGYQAAKD VADANPEHFLSLAHASRDVEYIEIIPAFFYYFTAT-  
FEPFNTALAREFFGLFEERLRIIEVLAVPPDRVLVLVQFVALAGTLPTS AEALPGVIACGFCEPNAAGVLE  
ADQDWNLHRSMGITLAFYDARES VKGWFDKGLHKDVAATGLREAGALTTPFHA EVTAKQCVPAVH  
RVLDLGEVEAALIEIDSAVMVADEEQTLADKPTTREN SVGAVGGVVL AGTMNMGANLDSVERAGNII  
IELEENYQAVNGKKADGKLT DKVLMVLSEAYFPVLR RMASANALDKGRFGLLIDAPDDADNQDHG  
RSLTIPAPTVAESAPLFAETEIERIAWIAPIHLLGTLD AVLGFEPDQYSFISMMIDASLNIMKTAEV--  
DYHVLEKGSRRPPGFRIILIKGLHIRLLAGICTIIVVGSAGRAEVTAYIQG-  
AVPITLNKKTFLPAFAASSCH AIDIFSTMLRPPERSTIQTLILETVTEL-  
LEVTRLENDKLERMETLLPGLDIAELLGLVAAAADFTAIVTIDRAITAILSVA AEAVV LREMLLT LAEIAVT  
ALALALALLMLTKDQGLHQKDHAREAQMKELIQGGVVLQV KAAERMMLASTADKVRLDTDEGTT S  
AFASLNLATVSDGFYVLSSSVLQMSSDLMMIIVARVLADKETKNALVVRHPEQVKTQSTYAEGSPG  
MVLQTLTGAIPLAIKPEAVELLWTLVAALWKVKAHLANAARPHQERV LILILALS LITVLLQSEGGGM  
GG--  
TNPPAKMLAAFSILT IKAKAGDEV RKVTRRVMDLNSRLGRPEESVNPEFRGAELEQSKYE AENVEVDT  
METIRRFVDIPFLVSIRTQHNESEDRGARMVLDVTIRIFIDL-  
VTKKSEIILAA RAETDGIIAREMGKDLAALHPQAAA LGKIAALQHFI AQDAHISNYVTADIHAVLGMLL  
LVLFIQEVRVAKVWVPTRRREVTMV FILAALAVFFLVIGLGVQIVFMLS GISWNA LTTIVLGE GIMVVRQT  
STFPEDS-  
IGILQNTFAELICSGRVAKADIENSLHIVVAGRVARGTWYVIYLYEINQAQGQSGIMQRAFRQMTLSQ  
SLIDGRMEVKIKVVTSDRYA-  
TYEIKGGQHRKGTRYNRVKVGHNIPVQVLPRMKMAFTPPNLVLVKTFGAVVQKRFAQAL THIRHGA  
VTIGPMEVSSPYIQNK KARHAPGD AVVDL KPDNIVRSVAVVPELIWARENEDQGAVHDKYVKTTHKL  
AAKRKKAVDKAQYDHRNQVELSFIGLAVKVLPEQAIVHATSGQLMPTASVAVTEGMKGIAATIRLDP  
MEKALIAIYIKRMRPQLNLAGKQDKKIVKCLNNNLDDVEYGKLGRRKIKPLTIKSVYDVESRRATELVKL  
MPYKDDVESRKSQFAEK--  
ALFEPLKAFMMMFGFIARAVYALYLRVIRRTILLAKTKVVVNADTVLSAIIIGVSIRLRHKSTNVAETNH  
HIKTIEKRARMTLAGAGKVKLNLSPGKIGMKGGRIKGYMPYKNFNIFDGLASGRRRAKVQDLAKLKNVD  
KTI AVD GIRQKQGGGRTPKAQLSNAI-  
NTRVGVDIVGENEQUEESNPRANAEMGQIFAKIDARVFSHVGALIGHALEAVLAVVTIWRIGRAHSLLA  
VRLHINAGIEMHSAA-VARAVAAA-FAQNAGEA-  
LVADVSEGD LGALAVTAMSVDVCRLRRRSLAELKKTCKDAYMSLTCFSGKGDKVKIVEATQTQAYEIV  
ATRTAERHGIRAKGTYGKERAMMQILPTKPVKIWVPVFVSEEELLAPIRAFAETQGDGVTVVKLT KDIK  
VTMFEKAVASLAVSGKATTVVYTVLEKVTELMKDIIYTQRAKAHYGRGRLRSHVVT TTKQRRHLSMIKR  
TVVADPSMDAARLTDGEVSVITGATMAFVMSEQEAV--

GDVDLHYHEEPRREVEFGIGGPETFLTTEQPRLLAVLFLREYLLHIVEIGTTNGFSDAATIYDVL RAMVH  
KLDRLKSADIAKTRMVLVDDLMDMGVTEVAPRREAAGDKILSSYWINGVTANADIVLLVANLECP  
PENINCAIRLFYQIRITLQAKERDGDVSVAVVAADKQIEAAEGTVIYTIKGKTPGTAQMKLTIEG  
KSLAVQLFQIDTFMDDTWIATWLRADDVVFVAAEDGKEAVDHVVERDTEVEFAPQKDIVSRKIRI  
PAAPSAVVIWDPAIDREDKAEAGGTILKIYGPNLQDINCFTDIGAEPKIESLKAWDEKEKYVVRD  
DDIDTLVGKSSKVNKEFAIPDVAVCAPSKPGVTESIDRGEPKAGTCGEVANMAYPQESLVNAVSS  
VQKNISMVLAGHPVGEMGISREIERHLETNMCEIFVDKADVDVALDFYTLVLTVLRVGLDPPNARV  
QIDGESRKLMAIQDGEAALQRHPKVSAAATGTGLGAGVKARMPDDALILDGVVHGALSFTATDLPAG  
V-

VTPVFNTVKAQLKIDKVLLKSFHVVTLSFSNNKGEEHLVKLRNLAKKNTRHYEMLLKIRETECAES  
PHASVGVKLVKIDKLLQTICVAHYKAIPELLADLTALGVMGRQGLLHVPRMLMIL-----  
IFAKWDLQQQAII TDQTMGLAVRARDWSY-AISEVVGNTFFARTKEDDTEQRIHARNPV-VLL-  
LGKFVMI-

ISPSGLGLQSTAETEQLGNAEPLILSPERLQDEMGYYVIAILLVFDQVILAYGSGEPIKFLVADQAV  
TGKQNPGMVTLTRRTFPLELQRDATFVMVFEDSTMKNLSHKMHMNLVLIKSRGWLNVNSTKILISD  
QAIASAEADAGAHQTQPSALAVITSRVMAPIVLVVSQKPTAPSKSLFLEALALYDAVTATVLNKP  
KKYFIFEGDVVSVLGRDLAAVLLGMQRPQPDAMRRRAIVAAAIRLAIAALASGIVTRLEEGLINFS  
RAVSFTR-  
AY-----AFVRNHDVSTKRSKPYKAHTKFLHKADVDKSLIAEGVDTLA

>Yoonia sp. 76

AVIRPVTMKTYAPVLMIAQSQVATVSGAGSPSLRAKTVYAKSGLQRKSETKRVVKDFYY-  
GVVKLGNLVQLVSISVDNRAVCTVAQLVEQEVVHGMVALDAVKKKIALEAITGMTAEDPAKVVDY  
ASEDLRKFRDADDRADMLPILLGLTLKIRFDPHQPLVHDLPIPVVFEVV-  
GIMVQRGTEI VDECAISTAISDVDPVIVVSPIDLA AVSGDKMAYIDQESAVSAAKADIAL--  
LALES AVL VGI-PLLIPV-FAADADV-MSFANRSRTLKTIVNLAVSYPTIKRA-IDG-IAASL-  
MEASQAALAEKRGTAEQIRIVKRMQRSAGLADDP ELVLLEDAAEGNSNWAGQIYDDPLSGSSED  
SAGNIVYAANKRQNFQRSITFLRKVEISDQAAAPLMRGVKHNAKSR SARKVDDTIAALNFPNVPEG  
IAIRAAAGSQVHLLHDATEGEEILMIIVRWHTWKTAAIISLFT-  
AGDIVGLIELGGIGAVGRKEGLNRRHHKMNGALIEQRRIVEKLT LRLRAALKQKIGAEQIIIFVVKVAG  
DLVAKAKIQM---

SVGAVVAIQGETIYVRRHRQT VIADEDATVEVLRGVAEGPADAQALLRIRVDHVLV KLSVLLIPE-  
PVLVESVSIREGVGKALQIIQLDVYLLRDMGTGEETLAKSR SREMIREILQVDPITGVRLAFGILRER  
LVKG GTMKELGTL---

LAIIKGITEPRMANLPDGVCRTFINAGPRAAVGMIFLLDDAGKIYTIDGDLRELTKSIKSLIGLVDA  
AKPKIMSAAYAAARLKVRYADVTVLVSDANLYAYAEERRELLRMVPVYITNAAARRQLIIFALS  
RGGHRRARAAIGVLIAAAILESQAEQGAVNHASPAVLLDDGEIVGSEMMISRQAALDLKQIIKT  
DVIVIFPEFQEKMVVSLKFFCTDVAIFVIALICTVGAMLSREPSSAQEDGAGFLKRIRAHSVLFALV  
ATFDRRNLRTS-A-NLFMALGLAPPRYGVLYTEQPKRKQMPSEPDADEVDGFDLVHAIKEDTASN  
HELDMPPEAMALAVE-DATINVTAGVLAMTGDMAAMEKVDSKRKMALAVTKWTISAEI VDI  
LISGAHPFRALD-IETADVSAGMPRKNI--

LYLPGANNAEMEEELDGAGASTAEAAADKQKGILMVVPVLVVIQDSNTAALIANGGLEEWGT  
MAYKKHYALAARMRLHMRTID-----QMEPNKQKAEIKTVKLEGDTRFRQLATEGVKEQMP-  
LHALNPDFAV-LPVLVTPAVGRVAADEQVLGARVPCDASL-  
RELQKSMG DALPISGIRLLGMRAARAMVDEDIMVAGKVAA-  
LLVILALETITHLVLRNDSEATLPWRLSVAERLEADMKRASGYAARPFQSKPSLCNTQAHAKIAD  
PIQEI

AAGYVATEARFVFPVEGIPIQLILASPHSRVGS AKRAGLGH LHEMAKELHAKAVIMVLNEPDTNTDGL  
LNYLTTQQPTDLLFEDCLDIVIDMRRMN VV-----  
VQLNTV-  
HIVIPGARELG DREIMAAAAPSGLVQTERVDDRTGRERTLMW MYGAMEELWLLSVTYADWV VNCAL  
GAILLHVYAQVINRAFSLDRLQLAGWP REASRW WNTWQLWLNKDGFFGYDAAFR AVLAVLSADLD  
DYEMSDVEGVGRHLSRQQRLVGYRIREQVAFEQ LDPRTDILLQSRTRLSVIRHALAMVAILIVREIVVEF  
TLVVAKEDVAMGHVECVLADSFDTAKDADIGPVGIRTPD TVLGDGTVFNEAVLGKIDFANTVADFR  
YKMLADGGRDLGVS WITLQNMLYARIWLPPAQAALKNLVPISFFLGHTELNLAIFPALWAGISKARAQ  
KLMAGALIEKILANVA AFADPEATTHQSKKAPHFKYYGEEVDPVYLAYILDIFALVATQVTVSDRLLTD  
HYVLNLKI-RGFTSLLWLSAQIADKGPAATVITVDTIMGLGALVFIILL-RASVLIETLYRYVYV-  
MLGYQAAKD VADANPEHFLSLAHASRDVEYIEIIPAFFYYFTAT-  
FEPFNTALAREFFGLFEERLRIIEVLAVPPDRVLVLVQFVALAGTLPTS AEALPGVIACGFCEPNAAGVLE  
ADQDWNLHRSMGITLAFYDARES VKGWFDKGLHKDVAATGLREAGALTTPFHA EVTAKQCVPAVH  
RVLDLGEVEAALIEIDSAVMVADEEQTLADKPTTREN SVGAVGGVVL AGTMNMGANLDSVERAGNII  
IELEENYQAVNGKKADGKLT DKVLMVLSEAYFPVLR RMASANALDKGRFGLLIDAPDDADNQDHG  
RSLTIPAPTVAESAPLFAETEIERIAWIAPIHLLGTLD AVLGFEPDQYSFISMMIDASLNIMKTAEV--  
DYHVLEKGSRRPPGFRIILIKGLHIRLLAGICTIIVVGSAGRAEVTAYIQG-  
AVPITLNKKTFLPAFAASSCH AIDIFSTMLRPPERSTIQTLILETVTEL-  
LEVTRLENDKLERMETLLPGLDIAELLGLVAAAADFTAIVTIDRAITAILSVA AEAVVREMLLT LAEIAVT  
ALALALALLMLTKDQGLHQKDHAREAQMKELIQGGVVLQV KAAERMMLASTADKVRLDTDEGTT S  
AFASLNLATVSDGFYVLSSSVLQMSSDLMMIIVARVLADKETKNALVVRHPEQVKTQSTYAEGSPG  
MVLQTLTGAIPLAIKPEAVELLWTLVAALWKVKAHLANAARPHQERV LILILALS LITVLLQSEGGGM  
GG--  
TNPPAKMLAAFSILT IKAKAGDEV RKVTRRVMDLNSRLGRPEESVNPEFRGAELEQSKYE AENVEVDT  
METIRRFVDIPFLVSIRTQHNESEDRGARMVLDVTRIRFIDL-  
VTKKSEIILAA RAETDGIIAREMGKDLAALHPQAAA LGKIAALQHFI IQDAHISNYVTADIHAVLGMLL  
LVLFIQEVRVAKVWVPTRRREVTMV FILAALAVFFLVIGLGVQIVFMLS GISWNA LTTIVLGEGIMVVRQT  
STFPEDS-  
IGILQNTFAELICSGRVAKADIENSLHIVVAGRVARGTWYVIYLYEINQAQGGQSGIMQRAFRQMTLSQ  
SLIDGRMEVKIKVVTSDRYA-  
TYEIKGGQHRKGTRYNRVKVGHNIPVQVLPRMKMAFTPPNLVLVKTFGAVVQKRFAQAL THIRHGA  
VTIGPMEVSSPYIQNK KARHAPGD AVVDLKP DNIVRSVAVVPELIWARENEDQGAV HDKYVKTTHKL  
AAKRKKAVDKAQYDHRNQVELSFIGLAVKVLPEQAIVHATSGQLMPTASVAVTEGMKGIAATIRLDP  
MEKALIAIYIKRMRPQLNLAGKQDKKIVKCLNNNLDDVEYGKLGRRKIKPLTIKSVYDVESRRATELVKL  
MPYKDDVESRKSQFAEK--  
ALFEPLKAFMMMFGFIARAVYALYLRVIRRTILLAKTKVVVNADTVLSAIIIGVSIRLRHKSTNVAETNH  
HIKTIEKRARMTLAGAGKVKLNLSPGKIGMKGGRIKGYMPYKNFNIFDGLASGRRRAKVQDLAKLKNVD  
KTI AVDGI RQKQGGGRTPKAQLSNAI-  
NTRVGVDIVGENEQUEESNPRANAEMGQIFAKIDARVFSHVGALIGHALEAVLAVVTIWRIGRAHSLLA  
VRLHINAGIEMHSAA-VARAVAAA-FAQNAGEA-  
LVADVSEGD LGALAVTAMSV DVCRLRRRSLAELKKT KDAYMSLT CFSGKGDKVKIVEATQTQAYEIV  
ATRTAERHGIRAKGTYGKERAMMQILPTKPVKIWVPVFVSEEELLAPIRAFAETQGDGVTVVKLT KDIK  
VTMFEKAVASLAVSGKATTVVYTVLEKVTELMKDIIYTQRAKAHYGRGRLRSHVVT TTKQRRHLSMIKR  
TVVADPSMDAARLTDGEVSVITGATMAFVMSEQEAV--



GDVDLHYHEEPRREVEFGIGGPETFLTTEQPRLLAVLFLREYLLHIVEIGTTNGFSDAATIYDVL RAMVH  
KLDRLSADI AKTRMVLVDDLMDMGVTEVAPRREAAGDKILSSY WINGVTANADIVLLVANLECP CV  
PENINCAIRLFYQ RITLQAKERDGDVSVAVVAADKQIEAAEGTVIYTIKGKTPGTAQMKLTIEGSR SVV  
KSLAVQLFQIDTFMDDTWIATWLR AADDVVFVAAEDGKEAVDHVVERDTEVEFAPQKDIVSRKIRIYT  
PAAPSAVVIWDPAIDREDKAE AQGTILKIYGP NLQDINCFTDIGAEPKIESLKAWDEKEKYVVHRDDIP  
DDIDTLVGKSSKVNKEFAIPDVAVCAPSKPGVTESIDRGE PKAGTCGEVANMAYPQESLVNAVSSAN  
VQKNISMVLAGHPVGEMGISREIERHLETNMCEIFVDKADVDVALDFYTLVLT VLRVGLDPPNARVQI  
DGKESRKLMAIQDGEAALQRHPK VSAATGTGLGAGVKARMPDDALILDGVVHGALSFTATDLPAGR  
V-  
VTPVFNTVKAQLKIDKVLLKSFHVVTLSFSNNKGEEHLVKLRNLALKKNTRHYEMLLKIRETECAESPHA  
ISVGKVLKIDKLLQTICVAHYK AIEPLLADDLTALGVMGRQGLLHVPRLMIL-----  
IFAKWDLQQQA IITDQTMGLAVRARDWSY-AISEVVGNTFFARTKEDDTEQRIHARNPV-VLL-  
LGKFVMI-  
ISPSGLGLQSTAETE QDLGNAEPLILSPERLQDEMGYYVIAILLVFVDQVILAYGS GEEPIKFLVADQAVT  
GKQNP GMVTLTRRTFPLELQRDATFVMVFEDSTMKNLSHKKM HMNVLIKSRGWL VNVSTKILISDQ  
AIASYAEDAGAHTQPSE SALAVITSRVMAPIVLVVSQKPTAPSKSLFLEALALYDAVTATVLNKP KKYFIF  
EGDVVSVLGR LDAAVLLGMQRPQPDAMRR AIVAAAIRLAIAALASGIVTRLEEGLINFSRAVSFTR-  
AY-----AFVRNH DVSTKRSKPYKAHTKFLHKADVDKSLIAEGVDTLA  
>GCA\_900102015  
AVIKPVTMDVYAPVLMIRQQQVATVSGAGSPSLRAKTVYRKSGLQRKTLTKWVAKPIYY-  
GVLQMSKLPQLVSISVDNRAVCTVAQVVEQEVVVHGLVALEAVKRKIALEAIDGMTSEDP AKVVDFE  
GELELRRFRDAEDRADMLPVLLGLTLKV KFDPHQPVVHDLPPVPVIFEVV-  
GLMAQKGTIEVDECGISTAVSDVDPIAYVSPIDLD AVAGEKMAFIDQEA AVANAREEIALEELALESTV  
LVVGI-SLLIPV-FAEDGAR-MSFANRSRTLESIVELAVAFPELGRARIS-GIAAAM-  
MGRARAAA LAEKRGTAEEIRIVKRMMRSAGLADDPELVILEDAAEGNAQWAGQIYDDPVSGSSED  
SQGNIVHAANKRQNFARSITFLRKVEISQQA AAPLMRGVKHNAKSRSSRKLSDTIAELNFPNVPEGVA  
IRAEAGRRQD TLLHDAAEREEILMLIIRLHV TWKTAVLIVLLSRAGDVVGLMTLGGIAAVGRQDGLLNR  
HHKLNGSLIEQRRVIEKLT LRLRAALKQKLGAEQV IIFVVKVAGDLVAEATVQMG--  
DIGAVVAIQGDVIFVRRHRQT VVTDQESTVEILRGVAQGPADAQALLRIRVDHTVVEISVLLIPE-  
PVLVESVTIREGVGKALQIIQLDVYLLRDMGTGDETLAKSR SRELIRDLLTLEPITGVRLAFGGLKERQAR  
SMKLKDLRTLL--  
LSILECVTEPRMQDHPGGVRRDLIEAGPRAAVGMLFLILDEAGRIYTIDGELREIPKTIKSLIGLLDAARPK  
VLSAGYATERLRIRYADCMVLTSEANLYAYREERGELLRMVPVYIVTAAKRRQLVIFALSLRGGHRRAK  
AALEVLI AAAIIESQAVKGAVHHEEPRILLDDAEVVGSEMMISRQAALDLKQVLKTDVIVVFPEFQEKM  
VVSLRFFCTDVAIFVIALITTVGQM LSRSPSHAQETGAGYGKRIRGHSALFALAVTLDRRNMRD--  
APTLFLGLGLAPPRYGVLYTQQPKKKQMPAEPDGDKVDGFDLVNAV KADAAS-  
HELELREAMALAVEADAPVNLTAGVLALTGGMAAMAKVDSKRKVALAATKWNIAKLELADLHLSGA  
APFRALD-IELADVSAALAAKDI--  
LFLPGANNAEEEEKLDGAGSSTVDSAEDRQRGILLVVPVVVVIQDSNAASLVANGGVEEWGTMAY  
KKHYAFAARMRLHMRTID-IELGVSLEPNKQKA EIKTVKLEGDTRFRQLAVEGVKEQMP-  
LHALNPDFAVLVP LLVTPAVGRVAAEREVLGARVPCDASL-  
RELQKSQTGQALPISAIRLLGMRAARGMIEEDIMVAGKVAA-  
LFKIGALETVA AFVLRNDSEATLPWRLSVAERLEADHKRAGGYAARPFRSKPSLCNVQAHAKVSDPIQ  
EIAAGYIAKEERFVFPVEGLAIQ LILSSPHSRVGTAKRAGEGHLHEMAKELQGKAVLMVSNAPDTNTEG

LLKYLTTRPTDVLFDCLDIIDMRRMAVV-----  
VQLNVV-  
HVVVPGCCPGVEFDIMSAAADSGLVQVERVDERTGRERTIMWMYGAMEELWLLSVTWADWVWDA  
PIGAILLHVYAQSINRAFSLTRQLQGWPREAERWWNTWQLWLNKDGFFGYEAAFRVVKQVLKADL  
HDYDMSDVEGVGRYQSRQELRVGYRIRREEVEFERLSPRTDILLQSTTRLAVLRHALTIVAILIRDIVAFT  
-  
VVAQEDVAMGHVECVLADSFDFATAKNAHIGPVGIRTPATVLDGTVFKDAVLGKVDFAFNTVADFRY  
KVLMDGGRELGVWVTLQDLLVGRIWLPPAQAALKDLEPIAFFLGHPELNMDLAPALWAGISKARA  
QRLMASVLVERILDRVAAFAAPEATTHQSRKEKHFKYYGEEVDPVHLAYILPMFALVATQVTVSDRLL  
KDRYALNMRV-RGMTSLLLGLQLSANGPAATVITVDTVMGLGALVLFVILL-RDTVIETLYHKYVY--  
MRGYEAAKDVAADADPEHFLTAQVSRDVEWIEIVPAFFYYFTAT-  
FEPFNTAVAKEFFGLFEERLRVVDVLVAPPPRVEEIVEFVALAGTLPTAGDALPGVIACD-  
CTPNAAAVLEADQDWNLHRSMGITLASFKAQQSVKGYFDKGLHKNVAQFGLGEAGALTTPFIAGSE  
AKRCAPAVHRVLDLGEIEAALIEIDSAVRVATEEQTLADKPTTREKSVGAVGGVVLGAGTMNMGALE  
QVERAGNIIIEEETIYHAVNGKKADGKLTDKVLMVLSGAYFPVLRTLTSANALDRGVFDILVDAPDDA  
ENLDHGREMTIPAPSVHTETTPLYAEAEIDRIAWIAPLHLLGLTAAVLGFEPDQYSFISMMEASLEIMET  
AEVMEDYHVLEKGARPPDFRTILIRGLHVRTLAVGTIIVVGSAGRSEVTAYIQG-  
AVPISLRRQTFLPAPASSCHKVDIFSTMLRPPERSAVQTLILETVAEL-  
LEVTRIENSKLERMALLPLGLDVARLLELVAAAEDFASIVTISAAITAILSVAAEPVVLRELLTLAEIAVTAL  
ALALALLMLTPDKGLSQREDAREKQMKELIQGGVVLQVKAADRMVLASTADKVRDLTDEGTTSAFA  
SLNLATVSDGFYVLSSAVLQLSSDLVMIVQVARVLADKEHKNALVVRHPEQVKTQPTYAEGSPGMVL  
QTLTSSIPPLAIKPEEVELLWTLVAALWRVKAHLASAARPHAERVLVLILALALIVVLLQSEGGGMGGG-  
MGAAAKGLAAFSILTIAKVGDEVKVTTRVMDLTSRLGRPEESVKPEFRGAEEQAKFEAENVEVDT  
METIRRFVDIPFLVSTRTQHNESEDGARMVLDVTRVRFDL-  
VTKRSEIILAAVETDGIAREMAKDLQALQAELAALGKVAALQHFISLSDGHISNYVTQDIHSLGMLI  
LVLFAQQTRISKVWVPTRRVETMVFLAAVALFFLVIGLAVQIVFMLSISYQQITTLVLGEGVMGVRQ  
TSTFPSES-  
IGILQNTYADLIAAGRVAKADIEKSLHIVVGARVARGTWYVIYLYEISQAQSEAGIVQRAFRQATLSQSL  
IDGRMEVKIKVVTSDRYA-  
TYEIKGGQHRKGRFNRVKVGHNIPVDVLPRLKMAFGPPNLLVKTFGAVVQKRFAQPLTHIRHGAVT  
IGPMEVSSPYIKSKKARHAPGDSVVDLKPDNIVRSVAVVPELIWARENEDNGAVHDKYTKTHKLQAK  
RRKAVDKAQYDKRNQVHMSFIGLAVKVLPEKAIVHATAGTLLPTSSVAVTENLKGAATIRLDPMEKA  
LIAYIKMRPQLNLAGKSDKKIVKCLNNNLDDEFGKLGRRKIKPLTIKSVYDVEHTQATELVKLMPYK  
DDVEGRKSQFAEK--  
ALFEPLKAFMMLFGFIARAVYALSLRVVRRITLMVKCRIVVNASSVLSAIVIGVSIRLRHKSTNVADTKH  
HIKTIEARARMTLAGAGKVKLHLRDGAVGLKGGRIKGYMPYVNYNIFDGLASGRRSKVKELAKLKKVD  
KEIQVEGIRVKQQGGRQPKADLSNAIANTRVDVIVGENVQEASNPRANAEMGQIFAIDARVYSLV  
GALIGHALAAILAVASIWGIGRAHNLLAVAFRVNAGIELHSAA-VEVAVAAA-  
WAQAAGEAALFADASESYLKLSVTAASLAVCRLRRRGLSELKTKKDAYMKLTCFGGKGERVKIVEA  
TQTQAYEIVATRTAERHGIHAKGSYGKERALMQITPTKPVKVVVPVVFVSEPELLAPIRAFAETNGDGV  
VVKLTDKIKITMFEKAIASLAVAGKATSVLYTVLEKVTAKDIIEQRAKAHYGRGRLRSHVVTHTKSKR  
HLSMIRRTVVADPKMDAERLTDGEVSVITGATMAFVMSEQDAV--  
GDVKFHFHEEPPREAEVGIAGPETFLATEQPRVIALVFLRAYLIHIVEIETVGDFANAATIIDILRPLQNK  
DRKLSADIAKVRMCLADDVAAMGVTDQAPRREDAGDPILSAFWINGVPANADIILLVANLETSPVPE

NIDAAIRLFYQRVTLQAKERGGDVSVAVKAENQIEAAEGTVIYTIKGTLPGLTQMCLTVEGVSKSIVKS  
MAVQLFQVTTFLDDTWIATLLRAASAVVFEAKEGREAVDHVVERDTALEFAPQKQDLARKIRIYTPA  
APSAVVIWDPAIEREDRADAQGTLKIYGNLQDISCFTDIGAEPKIESLKAWDEKEKYVVHRDEIPEDIT  
TLVGKSSRVNKEFGIPDVAVCAPSKPGVTESIDRGEPKAGSCGEVANMAYPQESLVNAVSSANVQKN  
ISMVLAGHPVGEMGISRTVERHLETNMCEIFVDREDVDVALDFSRLSLTPLRVGLDRPNARVEIEGRES  
RKLMAVL DGEADLQRHPKVSEAVGVVTTAGTKAKLPDDALIFDGV LHGDVSFTATDIPEGRV-  
VTPVMLQVKAQLKIDKVMVKTFHVVTLSFSSNKGEHLIKLRLNALKKSTRHYEMPLKIRETECAESPH  
AIPVGKILKIDNLLQTICQAHYTEIEPLLADDTALGVMGDQGLLHVVPRLMILAVMHLAGLEARRAVP  
EWGLQARALVTDQTMGLAIRERDWSF-AISEVVGNTFFAKTADDETEQRLHARNPV-VLL-  
YGKFGMV-  
ISPSGLRLASTAPGDM DRENEEELILSAERLQDEMGGYVLRVLLVFVDEIILAYGSGTQPLKFLVAEQAV  
TGRDNPGMVTLTRRTFPLDLQRDAVFVLVFEDSTMKNLSHKMHMNLILIKNGWVVNVSTKILISD  
QAIASYAEDAGAHTQPSALAVITSRVIAPVLVVSQKPSAPSKSLFLEALSLYDQVTATIQNAPKRYFI  
FEGDLVSVLGGLDAAVLLGLQRPQPDRMRRAVIAAAIRLAIALRASEVPARLDEGLINFSAVSFAARL  
WGALEAV--A-----AFRVRAHSVSTKRSPYKEHPKFLHKADEEKSLVAAGVDTLA  
>GCA\_900109295  
AVIKPVTMPIYAPVLMIRQQQVATVSGAGSPSLRAKTVYAKSGLQRKSETKWVAKPIYY-  
GVLKMGNLVQLVLSISVDNRAVCTIAQLVEQEVVHGMVALEAVKKKIALEAIEGMTAEDPAKVIDY--  
EIALKKFRDAEDKADMLPVMLGLTLKIKFDPHQPLVHDLPIPVIFEVI-  
GIMAQKGTIEVDECGISTAVSDVDPIAYVSPIDLKAVKGKEMKYIDQEAAVSAAKEAIAL--  
LALESGVLVVSIKPLIPV-FAAEA-T-MSFANRSRTLKTIVNLAVGYPELSRARLGIGIASSM-  
MDRAQAAALAEKKGTAEQIRIVKRMQKSAGLADDADLVILEDAAEGNSSWAGQIYDDPISGSSES  
AGNIVY-  
ANKRQNFARSITHLRAVEISDKAAAPLMRGVKHNSKSRAARKLDDRIAQLNFPNVPEGIAIAAGANKP  
SEILLHEAAEGEEILLIVRWHTTWKTAIITLVAVADNIVGLIDLGAIGAVGRKDGMLNRHHKLNGSLIE  
QKRVIKLT LRLRASLKQKLGAEQVIIFVVKVTGDLVAQAKIQMG--  
DVGTVVAIQGPTIFVRRSRQTVIGDQEATVEILKGVAEGPADAQALLRIRVDHTLVKLSVLLIPEVPVLV  
ESVTIREGVGKALQIIQLDVYLLRDMGTGEETLAKSKSREVIRELLQIDPITGVRLAYGQLRERQSKALTIK  
EIDT---  
LSIMEHITEPRMENLPEGVCRTFIAAGPRAAVGMIFLIIDPAGKIYEIDGDLRENTKSIKSMIGLVDAAKP  
KTLSAGYATARLKIRYSDVTVLISDADLYAYAEERRELLRMVPVYIIVEAKRRQLIFALS LKGGHRRASM  
ALGIMIAAAILESQAEEGAVNHAEPKILLDDAEVVGSEIMISRQAALDMKQIIKVDVIVIFPEFQEKMVV  
SLRFFCTDVAIFVIALICTVGSMLSREPSHAQETGAGFQKRIRAHSVLFALAVTFDRRNLRS--  
PVLFINRGLASPRYGIFYTEQPKRKQMPSEPKDRVDGFDLVHAIKNDATNNHALDMPEAMALAVE-  
SATINVSAGVLALSGEMTAVEKVD SKRKM A VAVEQWNISNIAIEDILASGAAPTRSLD-  
AEVADFSAMLFNKKIWFLYLP GANNAEMEEAKLDGAGSSTAEEAEDKQINILLVRPVLVVIQDSNTAS  
LIANGGLEEWGTMAYKKHYALAARMRLHMRTID-----  
MEPNKQKAEEKIKTVKLEGDTRFRQLATEGVKEQMP-  
LHALNPDAVLIPVLVTPAVGRVAADEKVLGAKVPCDVSL-  
RELQKSQKGRALPISGIRILGMRAARAMIEEDIMVAGKVAA-  
LLVIGALETICGLVLMNDSEATLPWRLSVAERLEADTKRAGGYAARPFKSKPSLCNTQAHAKIADPIQEI  
AAGYVALEKRFVYPVESIAIQLILASPHSRVGN AKRAGLGHLEMAKELQSKAVMMVLNEPDTNTEG  
LLNYLTTRQPTDLLFEDCLDVVIDMRMSV-----  
VQLNTV-

HVLVPGVRDMAKREIMQAAAHSGLVQVERVDDRVGRERTLMYMYGSMEELWLR SITWGDWVIDC  
AIGAIVLHVYAQSINRAFSLERLQLAGWPPEASSWWNTWQLWLNKDGFFGYAAGFRAMA AVLKAD  
LADFEFNDTEGVARLLSRQEIRAGYRIRQQIAFARLDPRTDILLQSKTRLSVIRHALAVVAILIVREVVAEF  
TVVWAMEDVAMGHVECVLADCFEFTAKDADIGPVGIRTPDPVLGDGTVMKEAVLGKIDLANTVADF  
RYKMLVDGGRKLGVEWVSV-  
NMLYDRIWLPPAQAAALKNMVPVFFLSHPELNLAIFPALWAGISKARAQQLMAGALIEKILDDIAAFA  
DPEATTHQSNKAKHFKYYGEDVDPVYLYILPVFALVATQVTVSDRLLKDRYVLNLKIFRSFTSLLWMS  
LQLGNKGPAATIITLGTVAGLGALVLFILL-RAVVLEETLYRYVY--  
MKGYQAAKDVADADPEHFLILASATRDVEWIEIIPAFFYYFKTATSRLTKNTANAREFFGLFRERLRVVD  
VLCVPPDRVEALSDFVALAGTLPTSAEA-  
PGVIACDFCEPNAAAVLEADQDHNHLSRSMGITLAFYDARASVKGWFDKGLHKDVAATGLTEAGALT  
TPFHAGADAKRCVPAVHRVLDLGEIAAALIEIDSAVVVADEEQTLADKPTTRDNSVGAVGGVVLGT  
MNMGANLDSVERGGNIIIEEDNYGAVNGKKADGKLTDKVLMVLSQAYFPVMTRTSSANALDKGV  
FDLLIDAPDDADNLDHGGTLTIPAPSIL-  
ETAPLFAESEIERIAWIAPIHLLGTDAVLGFEPDQYSFISMMIEASLDIMDTAEVLDDYHVLKKGSRPPG  
FRVILIKGLHIRLLAGIGTIIVVGSAGRVEITAYIQG-  
AVPITLNKVTFLPAFAASSCHVIDILSTMLRPPERSAIEMLILETVAEL-  
LEVTRFENDKLERLDVLLPGLDLAELLKLVALASDFAAIVTIDRAIAAILSVA AEAVVLEREMLLTAEIAITA  
LALALALLMLTRDKGLTQKEQAREDQMKDLIQGGVVLQIKAEDRMMLASTADKVRLDTDEGTTSF  
ASLNLATVSDGFYVLSSAVLQMSSDLMMIVNVARVLADKETKNALVVRHPEQVKTQTTYAEGSPGM  
VLQTLTAAIPPLAIIKAEDVELLWTLVAALWQVKAHLANAARPHKERVLLILALALITVLMQSEGGGIG  
GG--  
GAPAKLLAAFSILTIIKAKAGDEVKVARVM DLNSRLGRPEEAVNPEFRGAELEQSKYE AENVEVDTM  
ETIRRFVDIPFLVSTRTQHNESEDGRSRMVL DVTRIRFIDL-  
VTKRSEIILAARAETDGIIAREMQKDLQALHEEVAALGKIAALQHYIAIQDGHISNYVTADINSVLGMLL  
LVLFINETRVAKVWVPTREVTMVFIMAA LAVFFLVIGLAVQIVFMLS GISWQQLTTIVLGE GVM AVR  
QTSTFPADS-  
IGILQNTYADLICSGRVAKADIENSLHIVVAGRVSRGTWYVIYHYDISQAQQNSGIMQRAFRQATLSQ  
SLIDGRMEVKIKVVTSDRYAQTYEIKGGQHRKGTRYNRVKVGHNIPVQVLPRMKMCFTPPNLVLVKT  
FGAVVQKRFAQPLTHIRHGAVTIGPMEVSSPYITSKKARHAPGDSVVDLKPENILRSVAVVPELIWARE  
NEDNGAVHDKYVKTTHKLAARKKKA VDKAQYDHRNQVELSFIGLAVKVLPAKAI VHATSGTLMPTAS  
VAVTEGMKGIAATIRLDPMEKALIAIYIKRMKPQLNLGGQTDKKIVKCLNNNLDDVEY GKLGRRKIPITI  
KSVYDVESRRATELVKIMPYKDDVEGRKSQFAEK--  
AIFEPLKAFMMLFGFIARSVYALYLRVIRRTILLVKTIVVNAGTVLSAIKYIGVSIRLRHKSTNVAETNHHI  
KTIEARARMTLAGAGKVKLNLHPGRVGTGKGRIKGYMPYKNFNIFDKLASGRRAKVAALAKLKKVDKE  
IKVDGIREKQQGGRTPKAQLSNAIANSRVGVDIVGENEQEESNPRANAEMGQIFAKIDARVYSHVGA  
LIGHALAAVLAVVAIWGISQAHNLLADKLKINAGIEMHSAA-VDAAVAAA-  
FAENGGEASTLADVSEAYLGSLVTANSMDICLRLRRRSLNELKTKKDAYMSLT CFGGKGDKVKIVEAT  
QTQFYEIVATRTAERHGIRAKGTYGKERAMMQITPTKPVKIWVPIFVSEDELLAPIRAFAETVGDGTV  
VKLTDDVKVTPFEKAVASIAVTGKSTSVIYTVLEKVTELSDIITYQRAKAHYGRGRLRSHVTTTKQKRH  
LSMMKRTVVADPSMDAARLTNGEVSVVTGATMAFVMSEQDAV--  
GDVDLHYHEEPRREA AVGIAGPETFLATEHPRTLALLFLRAYLLHIVEIETEKGFSDAATIYDVL RAMQN  
KLDRKLSADIAKIRMVLT DNLTDMGVTEVAAKREAAGDKILSAFWINGVTANADIILMVANMEVPCV  
PENINCAVRLFYQRITLQAKERDGDVSVAVVPAANQIEAAEGTVIYTIKGKEPGSAQMKL TIEGISRSIV

KSLAVQLFQVDTFLDDTWLGTLLRAAIEVVFVDAGEGKEAVDHVVERDTELEMAPQKDIVARKIRIYTP  
AAPSAVVIWDPAIEREDKADAQGTLKIYGP NLQDINCFTDIGAEPKIESLKAWDEKEKYVHRDDIPE  
DI-  
TLVGKSSKVNKEFAIPDVAVCAPSKPGVTESIDRGE PKAGTCGEVANMSYPQESLVNQVSSANVQKN  
ISMVLGGHPVGEMGISRSIERHLETS MCQIFVDKDDIDVALDFYILALTALRVGLDPPNARVQIDGKES  
RKLMAIQDGDADLQRHPKVSQATGGQ-KAGVKARMPDDALILNGVMHGDLSFTATDLPDGRV-  
VTPVFNQVKAQLTIDKVMLREFHVVTLSFSNDKGEEHLVKLRLNALKKSTRHYEMLLKIRETECAESPH  
AISVGKVLKIDKLLQTICEAHYKAIEPLLADDTALGVMGEQGLLHVPRMLAVLHLWGIGA AKFI AV  
WDLQADAIITDSTMGLEARDRSWSFVAISEVVSNTFFARTADDDTEQRIRAQNPV-VLL-  
YGKFDMT-  
VSPSGLGLDSTEDSDQERGNADDLILSSERLQDEMSYYILRILLVFVDEVILAFGSGERPIKFLVAEQAVT  
GRQNPGMVTLTRRTFPLELQRDATFVMVFEDSTMKNLSHKKMHMNLVVIKSGWIVNVSTKILISDQ  
AIASY AEDAGAHTQPSESALAVITSRVMAPIVLVSQKPTAPSKTLFLEALSLYDEVTATVLNPKPKYYIF  
EGDVIAILGSIDAAVLTGLQRPQPNRMRRRAVVADAIRLAIAL-  
AADVIGSLENQIVNFARGVSFVRDSYPTCAAIRTT-----  
AFRVRNHKVSTKRARPYKGHTKFLHKADIDKSLIASGVDTLA  
>GCA\_900110065  
AVIKPVVIDDYSPLMIKQQQVATVSGAGSPTLRAKTVYAKSGLQRKVETKWVAKDFY-  
GVVKMANLVQLVSISVDNRAVCTVAQLVEQEVVVRGMVALVAVKKKIALDAIEGMTADDDPAKVVD  
Y-VRIALRKFRDADDKSDLLPILLGLTLKIKFDPHQPVVHDLPIPVIFEVI-  
GIMAQRGTIEVDDCGISTAVGDVDPIEYVSPIDLA AVAGDKMAYIDQEA AVQQAKDDIALAELALESA  
VLVVGIRPLIPI-FRDEADT-MSFANRSRTLTTIVDMAVSAVTQTRA-----IASTL-  
MDRSQAAALADKRGTAEEIRIVKRMQRSAGLADNP ELVMLEDAAEGNSNWAGQIYDDDISGSSES  
SAGNIVHAANKRQSFARSITFLRGVEISDQAAAPLMRGVKHNAKSRSRKLDDAITVLNFANVPEGIAI  
AAAADKPADTLLHDATEGERILMIIVRWHVTWKTAILFLME-  
AGDIVGLLTGGMAGVGRKDGVLNRHHKMNGSLIEQKRIIDKLT LRLRASLKQKLGAEQVILVVRVQ  
GDLVAQAEIQMG--  
DIGAVVAIQGPTIFVRRHRQTVIGDQEATVEVLRGVAQGPADAQALLRIRVDHTLVKLSVLLIPEVPVL  
VESVTIREGVGKALQIIQLDVYLLRDMGTGEETLAMSR SRELIRELLQIDPITGVRLAFGNLREREA KVLTI  
KEIDTLF--  
LAIASGITEPRMANLPQGVCRHFVRAGPRAAVGMIFLILDPAGRIYTIDGDLREL PKTIKALISLVDAAKP  
KALSAVYATERLK VRYEDVHVLVSDANLYAYAEARSEMLRMVPVYIINAAKRRQIVLLALS LRDGHRR  
VRMSIDVMIAAAIIESHADHGPVHHAEPRIILLDDAEVVGSEMMISRQAALDKTLVKIDVIVIFPEFQEK  
MVVSLRFFCTDVAIFVIALICTVGEMLSREPAAAQESGAGFQKRIRAHSVLFALSVTFDAANMKR--A-  
DLFIGMGLAPPRYGILYTVQPKRKQMPTEPDDEAVDGF DLVHAVKEDGRD-  
QKLDLPEAMALAVEATDTINVSGGVLA FDGSM AALEKVDSKRKMALAVVQWTIAPTTIADLRLSGAR  
PFRALT-IELADVTA ALEHKDVD-  
LYLPGANNAEMEADKIDGAGASTVEAAADRQRGILLTPVLVVIQDSNTAALIANDGLDEWGTMAY  
KKHYAFAARMRLHMRTIDGIEVGVQMEPNKQKNEKIKTVKLEGDTRFRQLATEGVKEQMP-  
LHALNPDFVV-LAVLVTPAVGRVA ADEDVLGAQVPCGASL-  
RELQKSQTGAALPISGIRLLGMRAVRAMVDEDIMVAGKVAA-  
LLVIVAFETICRLVLLNDSEATLPWRLSVATRLEADAKRAAGFAARPFMSKPSLCDTQAHARIADPIQEI  
AAGYVARDDRFVFPLEGLPIQLILSSAHSRVGTAKRAGLGH LREMAKELQAKAVLMVLAASDTNTEGL  
LRYATTRQPTDLLHDDCLDIVIDMRRMSV-----

VRLNTV-  
HVLVPGVCPLGDYQIMQAAAPSGLVEVEQVDDRTGPRTIMWWMYGAMEALWLLSVRYADWWVDC  
AIGAILHVYAQTINRAFSLDRLQLAGWPPEAASWWNTWQLWLNKDGFFGYDAGFRA-  
AAALGADLAGFDMTDVKGVRHQSRQELRVGYRIREQVAFELDPRTDILLQSMTRLSVIRHALEV  
AIMIVREIVIEFT-  
VVAQEDVAMGHVECVLADAFDFTAKNADIGPVGLKTPDPVLGDGTVLNDAVLGKIDFANTVANFRY  
RMIDDGGRALGVQWLTLANILVGRIWLPPAAAGLKNLQPICFFLGHPELNLDLLELLWRGISKARADA  
LMAGALIEKILEKVAADFADPDATTHQSNKVKHFKYYGEEVDPVYLAYIV---  
ALVATQVTVSDRLLTDRYVLNLKI-RGLTSLWLAAQIGNKGPSATIISLDSVAGLGALVLFILL-  
RDRVLLETLYWRYVY--MRGYDAAKDVAADADPEHLLNLAAATRDVEWIAVVPAFFYYFRTAG-  
FQPFNTAVAREFFGLFRERLRIVAVVAVPPDRVAALVVFVALAGTLPTSAQALIGVIACGLCEPNAAGV  
LEADQDWNLHRSMGITLAFYDARESVKRWFDKGLHKPVAATGLSEAGALTPFHAGQTAKVCVPAI  
HRVVDLGELEKSLIELDSAVVVADEEQLADKPTRDNSVGAVGGVVLATGMKMGANLDSVERGNN  
IIIEEEEQYSAVNGRKDGMKLTDKVLMVLSQAYFPVLRMASANALDRGAFDILLIDVPDDADNRDQ  
G-GLSIPAPTVHAETAVLFAESDIERIAWIAPLHLLGTLPAVLGFEPDQYSFISMIIEASLDIMETAEV--  
DYHVLETGSRPSDFRVILIKGLHVRQLAGIATIIVVGSAGRGEVTAYIQG-  
AVPITLRRRTFLPAFAASSCHTIDIFSTMLRPPPERSTIIMLILETVTEL-  
LAVTRLTNDKLERMLVLIPGLDMALLLDLEAASEDFQQIVTIEEAIVAILSVAAPVVLREMLLSLAEIAV  
DAMALALALLMLTPDTGLSQKEAAREGQLKVLIQGGAVLQIRAADRMVLAATADKVRDLDGTT  
SAFASLNLATVSDGFYVLSSAVLQMGSDLMMIKVARVLADKETKNALVVRHPEQVKTQSTYAEQSP  
GMVLQTLTGSIPLAVKPEDIELLWTLVAALWRVKAHLANATRPHTERVILILALALITVLVQSEGGI  
GGA--  
GPAARILAAFSILTIAKAVGDEVKVRVTRVLDLNSRLGRPEESVNPEFRGAEEQSKFEAANVEVDTMET  
IRRFVDIPFLVSTRTQHNESEDGRSRMVLVDVTRVRFIDL-  
VTKRSEIILAAARETDGIIARQMKGDLAALHPAAAALGKIAALQHFAISDAHISNYVTQEIHSVLGMVL  
LVLFINETRIAKVWVPTREVMTVLIMATLAIFFIVIGLFVSIVFMLSIGISWNQLTTIVLGEGVMAVRQTS  
TFPQDS-  
IGILQNTYADLIAAGRVAKADIEKSLHIVVAGRVTRGTWYVIYLYEISQAQGEAGIMQRAFRQKTLQS  
LIDGRMEVKIKVVTSDRYA-  
TYEIKGGQHRKGTRYNRVKVGHNIPVQVMPRMKMAFTPPNLVLVKTFGAVVQKRFAQALTHMRHG  
AVQIGPMEVSSPYINSKKARHAPGDAVVELKPENIVRSVAVPELIWARENEDNNNAVHDKYVKTTHK  
LAAKRKKAVDKAQYDHRNQVEMSFGLAVKVLDPKAIHVHATAGMLMPTASVAVTEGMKGIAATIRL  
DPMEKALIALIKRMRPQLNLAGKTDKKIVKCLNNNLDDVEYGKLGRRKIKPITIKSVYDVESRRATELVK  
LLPYKDDVEGRKSQFAEK--  
ALFEPLKAFMMLFGYIARAVYALNLRVIRRTILLAKCKIVVNAATVLSAIKIVGSIRLRHKSTNVAETNH  
HIKTIDKRARMTLAGEGKVKNLSEGRVGKKGGRIKGYMPYNNYNIFDGLASGRRAAVQEVAKLKKV  
DKQIQVEGIRAKQEGGRTPKAQLSNAMANTRVGVD-  
VGEHIQEEENPRANAEMGQIFAIDARVYNHVGALIGHALEAVLAIVAIWGIGRAHNMLALRLRVNA  
GIELHSAA-  
VEVAVACAGFATPAGEASLLVDVSEGPLGALVVTAAAVDVCRLRRRSLSELKTKKDAYMSLTCFAGK  
GDRIKIVEATQTQAYEIVATRTAERHGIHAKGTYGKERAMMQILPTKPKVWVPMFVDEEELLAPIRAF  
AETVGDGVTVVKLSTDIKITPFKAVASLAVSGKNTSVVYTVLEKVTQLMKDIIYTQRAKAHYGRGRLR  
SHVVTHTKSRRHLSMMKRTVVADPSMDAARLTDGEVSVVTGATMAFVMSEQDAV-  
PGDVKMHFHEEPRREAIEVGIAGPETFLATEHPRVLAVVFLRAYLLHIVEIQTVKDFSSAATIYDVLRAM

NSKLDRLKSADIAKTRMVLADNLMAMGVTEVAARREAAGDPILSSYWINGVTANADIVLLVANLEVP  
TVPENIHCAIRLFYQRVTLQAKERGGDVSVAVVPANKQIEAAEDTVIYTIKGKAPGSGQMKLTIEGISRS  
IVKSFAVQLFQVDTFLDDTWLGTLLRAAADVVFDAGDGKEAVDHSVVERDTEYEFAPQKDIVSRKIRI  
YTPAAPSAVVIWDPAIEREDKAEAQGTILKIYGPNLQDINCFTDIGSEPKIESLKAWDEKEKYVVHRDDI  
PEDIDTLVGKSSRVNKEFAIPDVAVCAPSKPGVTESIDRGEPKAGTCGEVANMAYPQESLVNNVSSAN  
VQKNISMVLAGHPVGEMGISREIERHLETNMCEIFVDKADIDVALDFSVLALTVLRVGLDPPNARVAID  
GKESRKLMAVYDGDAPLQRHPKVSAAATGGQ--  
AGVKATLGDDALEMDGVVHGDISFTLTDLDPGRV-  
VTPVYNNVKAQLKIDKILRAFHVVTLSFSNGKGEDHLIKRLNALKKNTRHYEMLLKIRETECAESPHA  
ISVGKVLKIDALLQTICVAHYKAIPELLADDLTALGVMGEQGLLHVPRMLILAVMHLWGLEAALELSR  
WGLQAERCVTDQTMGLAVRERHFSY-CISEVVGNTFFAMTKDDDEQELHARNPI-VLL-  
WGKFGMV-  
ISPSGLKLVSADALDRGNQDDLILSTERLQDAMGYVLRILLVFVDRVILAYGSGEPIKFLVADQAV  
TGRQNPGMVTLARRTFPLELQRDAVFVMVFADSTMKNLSHRKMHMNLVLIKSGWVVNVSTKILIS  
DQAIASAYEDVGAHTQPSALAAITSRVMAPIVLVVSQKPSAPSKSLFLEALALYDEVSTATVLNAPKK  
YYIFEGDVISVLHACDAAVLLGMQRPQPDMMRRAMVADAIRLAIAFRASGIVTRLRQGLINFARAVGL  
AGGVYPDFGALVMAIL-EALAFVRVNHAVSTKRSPYKGHTKFLHKADVKNKSLIAAGVDTIA  
>GCA\_900110705  
AVIKPVTMNAYAPVLMIAQSQVATVSGAGSPSLRAKTVYAKSGLQRKSETKWVAKDFYY-  
GVVKMANLVQLVVISVDNRAVCTVAQLVEQEVVHGMVALDAVKKKIALEAIEGMTAEDPAKVVDY  
QTRIAIRKWRDADDRADLLPVLLGLTLKIKFDPHQPLVHDLPIPVVYEVI-  
GIMAQKGTIEVDDCGISTAVSDVDPIAYVSPIDLAASVSGQKMDYIDQEAABAQAKQDIDLEELAESS  
VLVVGIKPLIPI-FRDDADE-MSFANRSRTLKTIVDLAVSYPEQTRAR---IAAAM-  
MDASQAAAAAEKRGTAEEIRIVKRMQRSAGLADDPELVMLEDAEAGNSNWAGQIYDDPISGSSED  
SAGNIVYAANKRQNFARSITFLRTVEISDQAAAPLMRGVKHNAKSRSRKLDDAIAALNFPNVPEGIAI  
RAAAGKATSTLLHDADEGEQILMLIVRWHVTWKTAAIYILEIAGNIVGLIELGGIAAVGRKDGLLNRHH  
KLNGLSIEQKRVIDKLTLRLRAALKQKLGQDQVILVVRVQGDLVAEAEIQMG--  
DVGAVVAIQGPTIFVRRHRQTVIGDQEATV-VLKGVAEGPADAQALLRIRVDHTLVKLSVLLIPE-  
PVLVESVTIREGVGRALQIIQLDVYLLRDMGTGEETLAKSRSRELIPELLQIDPITGVRLAFGNLREREAKV  
LNIKEIDTLF--  
LAIQGVTEPRMGNLPEGVCRTFVRAGPRAAAGMLFLILDDAGKIYAIDGDLREITKSIKSLIGLVDAAKP  
KALSAVYMTDRLKIRYEDVHVLISDADLYAYAEARRELLRMVPVYITNQAKRRQLVLLALSRLDGHRRV  
RMAIDVMIAAAIIESQAVNGAVHHAEPRIILLDDAEVVGSEMMINRQAALAMKEVLKVDVIVIFPEFQE  
KMVVSRLFFCTDVAIFVIALICTVGAMLSREPSHAQESGAGFQK--  
RAHSVLFALQATFDAQNLKKADAANLVGLGISAPRYGILYTVRPKRKQMPSEPDADKVDGFELVHA  
VKEDGRDN-KLDMPEAMALAVE-  
DATINVSGGVLAMDGDMAAIEKVDSKRKLALAVTKWNIARVSIQDLTISGARPIRAFD-  
ITVAKVTAALGEKAVS-  
LYLPKANNAELEADKIDGAGSSTVDAAADRQQGILLNPVLVVIQDSNTAALISNEGLDEWGTMAYK  
KHYAYAARMRLHMRITDIEVGVAMEPNKQKAEEKIKTVKLEGDTRFRQLATEGVKEQMP-  
LHALNPDAFV-LAVLVTPAVGRVAADQDVLGARVPCDASL-  
RELQSQKGDALPISGIRLLGMRAARAMVEEDIMVAGKVAASLLVIVAVETICKMVLLNDSEATLPWR  
LSVAERIEADTARAAGYAARPFMSKPSLCKVQAHANVADPIQEIAAGYVATEQRFVFPVEGLPIQLILA  
SPHSRVGVAKRAGLGHLEMAKELIGKADLMVQAASDTNTEGILNYLTTRQPTDLLHDDCLDIVIDM

RRMSVV-----VQLNTV--  
VVVSGVRDVGAYEIMQAAAPSGLIQVERIDDRTGRERTMMYMYGAMEELWLLSVRYADWVVDCAI  
GAIVLHVYAQVINRAFSLERLQLAGWPPEASSWWNTWQLWLNKDGFFGYEAAFRAQAAVLSAALY  
DYEMSDVEDVGRYPSRQELRVGYRIRAQVAFDRDPRTDILLQSRTRLSVIRHALEVVAIMIVREIVIEFT  
LVVAQEDVAMGHVECVLADCFDFTAKNADIGPVGLKTPDPVLGDGTVLNDVAVLGKIDLANTVADFR  
YRMIDDGGRQLGVEWLTNRNLLYSRIWLPPAEAALKNLQPICFFLGHPDLNLHLLDALWAGISKARM  
QALMASALIEQILDKVAAFADPDATTHQSNKVKHFKEYYGEEVDPVYLAYILDMFALVATQVTVSDRLL  
KDRYVLNLKV-RGFTSLWWLGAQLATKSPAATIIALDSIAGLGALVLFILL-RDSVLVETLYRYVY--  
MKGYEAAKDVADADPEHVLNLAASVRDVEYIEIVPAFFYYFKTAG-  
FEPFNTAVAREFFGLFKERLRVIDVLVPPDRVESLVAFVALAGTLATSAEALPGVIATGLCEPNAASVL  
EADQDWNLHRSMGITLAFYDARESVKGWFDKGLHKDVAQTGLSEAGALTTPFHVAVTAKACVPAIH  
RVLDLGEIEASLIEIDSAVTVADEEQTLADKPTRDNSVGAVGGVVLAGTMNMGANLDSVERGNIII  
ELEEESSAVNGKKDG-  
KLTDKVLMLVSGAYFVVMERIASASALDRGAFDILLIDVPDDADNRDQGREL-----  
-----PDQYSFISMMINASLDIMQTAEV--  
DYHVLEKGSRPAPFRVILIKGLHVRHLAGIATIIVVGSAGRSEVTAYIQG-  
AVPITLKRVTFLPAFAASSCHVIDIFSTMLRPPERSTIKMLILETVAEL-  
LEVTRLENDKLERMEVLLPGLDMAQLLPLEAHAADFPQIVTIDASIVAILSVAAPVVLDRMLLSLAEIA  
VEAMALALALLMLTPDQGLTQKETSREMQKELIQGGVVLQVRAADRMVLAATADKVRDLTDDG  
TTSASFASLNLATVSDGFYVMSSAVLQLSSDLMMIISVARVLADKEHKNALVVRHPEQVKTQSTYAEGS  
PGMVLQTLTGAIPLAIKADEVELLWTLVTALWAVKAHLANATRPRNERVLILILALTITVLLQSEGGGI  
GGG--  
GPPAKGLAAFSILTIIKAGDEVKVTRRVLDLNSRLGRPEESVNPEFRGAELEQSKYEAAANVEVDTME  
TIRRFVDIPFLVSTRTQHNESEDRGARMVLDVTRVRFDL-  
VTKKSEIILAAARETDGIIAREMKGDLAALHSEAAALGKIAALQHFIAIQDAHISNYVTANIHSVLGMLLL  
VLFINETRIAKVVWPTTRREVTMVFIMAALATFFLVIGLVISIVFMLSGISWNQMTTIVLGEVMAVRQTS  
TFPKDS-  
IGILQNTFADLICSGRVAKADIEKSLHIVVAGRVTRGTWYVIYLYEISQAQSPAGIMQRAFRQKTLQSqli  
DGRMEVKIKVVTSDRYAQTYEIKGGQHRKGTRYNRVKVGHNIPIDVLPRMKMAFTPPNLVLVKTFGA  
VVQKRFASALTHMRHGAVQIGPMEVSSPYIRNKKARHAPGDAVVDLKPelivRSVAVVPELIWAREN  
EDNGAVHDKYVKPTHKLKAKRTTAVDKAQYDHRNQVEMSFGLAVKVLPQKAIVHATAGMLMPTTS  
VAVTEGMKGIAATIRLDPMekaliAYIKMRPQLNLEGRTDKKIVKCLNNNLLDDVEYGKLGRRKIPITI  
KSVYDVESRRATELVKLLPYKDDVEGRKSQFAEK--  
ALFEPLKAFMMLFGYIARSVYALNLRVIRRTILLVKCKIVVAAATVLSAIIIGLSIRLRHKSTNIADTKHHIK  
TIEDRANLTmagagKVKLNLSEGKVGKKGRIKGYMPYNNYNIFDGLASGRRAKVKEVAKLKKVDKEI  
KVEGIRVKQEGGRTPKAQLSNAVANTRVGVDIVGEKIQEQSNPRANAEMGQIFAAIDARVYSHVGAL  
IGHALEAVLAIVAIWGIGRTHNLLALKLRINAGIEMHSAA-VTHAVACA-  
FAAPAGDASALWDASEAYLGAIAITEHAVDTCRLRRRSLSELKTKKDAYMSLTcfagKGDRVKIVEAS  
QTQAYEIVATRTAERHGIKAKGTFGKERAMMQILPTKPVKVVVPVFDVDELLAPIRNFaETVGDGVT  
VVKLQNDIKITPFekAVASIAVTGKSTSVVYTVLEKVTelsKDIYTQRAKAHYGRGRLRSHVVHTKSSR  
HLSMMKRTVVADPSMDAARLTDGEVSVVTGATMAFVMSEQDAV--  
GDVDMHFHEEPRREAELGIGGPETFLATEHPRTLAVLFLRAYLIHIVEIETTKDFSNAATIYDVLramask  
LDRKLSADIakTRMVLVDNLMDMGVTEVAAKRDAAGDKILSAFWINGVTANADIVLLVANLEVPTVP  
ENIHCAIRLFYQRITLQAKERDGDVSVAVVPANKQIEAAEDTVIYSIKGKTPGNAQMKLtieGISRSVVK



SLAVQLFQVDTFLDDTWLGTLLRAAIDVVFVDAGETKEAVDHVVERDTEYEFAPQKDIVSRKIRIYTPA  
APSAVVIWDPAIDREDKADAQGTLKIYGPNLQDINCFTDIGAEPKIESLKAWDEKEYVVRDDIPEDI  
-

TLVGKSSKVNKEFAIPDVAVCAPSKPGVTESIDRGEPKAGTCGEVANMAYPQESLVNAVSSANVQKN  
ISMVLAGHPVGEMGISREIERHLETNMCEIFVDKADVDVALDFYILSLTPLRVGLDPPNARV SIDGKESR  
KLMAVMDGDADLQRHPKVSQATGTG-NAGIKARLPDDTLIVDGVVHGDVSFTATDLPEGRV-  
VTPVFNDVKAQLKIDKVILKAFHVVTLSFSNGKGEDHLIKLRNLNALKKNTRHYEMLLKIRETECAESPHAI  
SVGKVLKIDSLQTICVAHYKAIEPLLADDLTALGVMGHQGLLHVVPRLMILAVLHLWGMAAAMEVA  
QWGLQANA-VTDQTMGLALRERHFTY-SISEVVGNTFFAKTKEDDTEQRLHARNPI-VLL-  
AAKFGMV-

ISPSGLKLTSTQASALGRENAEDLILSTERLQDAMGYVLRILLFVDEVILAYGSGERPIKFLVGDQAVT  
GRQNPGMVTLTRRTFPLDLQRHAVFVMVFEDCTMKNLSHKKMHMNILIKSKGWIVNVSTKILISDQ  
AIASYAEDAGAHTQPSESALAVITSRVMAPIVLVVSQKPTAPSKTLFLEALALYDEVTATVQNKPKKYYI  
FEGDVVSILGACDAAVLLGMQRPQPDRMRRAVVADAIRLAIALR-----

LEAGLINFARAVSLAVGVYTRFQAPP-AAMP-

PALAFVRNHSVSTKRSPYKGHTKFLHKADINKSLIAAGVDTIA

>GCA\_900114485

AVIKPVTIDDYSPVLMIKQQQVATVSGAGSPTLRAKTVYAKSGLQRKVETKWVAADFYY-  
GVVKMANLVQLVSISVDNRAVCTVAQLVEQEVVVHGMVALEAVKKKIALEAIEGMTAEDPAKVVDY  
-VRIAIRKFRDADDKSDLLPVLLGLTLKIKFDPHQPVVHDLPIPVIFEVI-  
GIMAQKGTIEVDDCGISTAVGDVDPIEYVSPIDLAAGDKMAYIDQESAVAQAKDDIALEELAESSV  
LVVGI-PLILPI-FRDEADT-MSFANRSRTLRTIVDMAVSAVTQTRA-----IASDL-  
MGQSQAAAALSDKRGTAEIRIVKRMQRSAGLADDPVLMLEDAEAGNSNWAGQIYDDDISGSSES  
SAGNIVYAANKRQNFARSITFLRTVEISDQAAAPLMRGVKHNAKSRSSRKLDDIAALNFPNVPEGIAI  
AAAAGKPTETLLHDATEGEQILMLIVRWHVTWKTAILYMMDRAGDVVGLIRLGGVGAVGRKDGML  
NRHHKMNGSLIEQKRIIDKLTLRLRAALKQKLGAEMVILVVRVQGDLVAQAEIQMG--  
DIGAVVAIQGPTIFVRRHRQTVIGDQEATVEVLKGVAEGPADAQALLRIRVDHTLVKLSVLLIPEVPVLV  
ESVTIREGVGKALQIIQLDVYLLRDMGTGEETLAKSRS-----

ITGVRLAFGDLREREAKVLSIKEIDTLF--

LAIATGLTEPRMANLPEGICRNYVRAGPRAAVGMIFLILDPAGRIY AIDGDLRENTKGIKSLIGLVDAAK  
PKALSAVYATDRLKVRVEDVHVLVSDANLYAYAEPSELMRMVPVYIINAARRQIVLLALSLRDGHR  
RVRMSIDVMIAAAIIESHADHGMVHHEEPRILLDDAEVVGSEMMISRQAAL ELKNIKIDVIVLFPEFQE  
KMVVSRLFFCTDVAIFVIALICTVGEMLSREPAQAQESGAGFQKRIRGHSVLFALSVTFDKANVKRA--  
-GLFLQLGLAAPRYGILYTVQPKRKQMPSEPDKDEVDGFDLVHAVKEDGRSN-

QLDMPEAMALAVEATETINVSGGVLGFDGDMAAMEKVDSKRKLALAIKKWTIAPISSVDIKISGAAKS  
RALG-IETADLTAALSKKDI--

LFLPGGNNAELETDKIDGAGSSTVDAAEDRQQGILLNPVLVVIQDSNTAALIANDGLDEWGT MAYK  
KHYAFAARMRLHMRITDIGIEGVQMEPNKQKAEIKITVKLEGDTRFRQLATEGVKEQMP-  
LHALNPDAFVLPVLVTPAVGRVAADQDVLGAHVPCGASL-

RELQKSQTGEVLPISGIRVLGMRAARAMVDEDIMVAGKVAA-

LLVIVATETICKLVLLNDSEATLPWRLSVATRLEADTKRAAGFASRPFMSKPSLCNTQAHARIADPIQEI  
AAGYVAREERFVFPVEGLPIQLILSSPHSRVGGAKRAGLGHLEMAKELQGKAVLMVLAASDTNTEGL  
LRYATTRQPTDLLHDDCLDIVIDMRMSV-----  
VQLNTV-

HVVIKATPVGDFEIMQAAAASGLVEVEQVDDRTGRERTMMWMYGAMEELWLMSVKYADWIVN  
CAIGAIVLHVYAQTINRAFSLERLQLAGWPPEASSWWNTWQLWLNKDGGFFGYPAAFRAVAAAFAE  
QLYDFDMRDVEGVGRHLSRQELRVGYRIREQVAFAKLDPRTDIMLQSMTRLSVIRHALEVVAIMIVREI  
VIEFTLVVAQEDVAMGHVECVLADQDFDTAKNADIGPVGLKTPDPVLGDGTVLNDVAVLGKIDLSNTI  
ADFRYRMIDDGGRELGVWLTQLNILYARIWLPPAAAALKNLQPICFFLGHPDLNLDLLDQLWAGISK  
ARAAALMAGALIEKILEKVATFADPDATTHQSNKIKHFKYYGEEVDPVYLAYILDLFALVATQVTVSDR  
LLTDRYVLNLKIFRGFTSLLWLAAQIGEGKPSATIISLDSVAGLGALVLFILL-  
RDSILVETLYRYVYVVMKGYEAAKDVADADPEHLLNLAGATRDVEYIEVIPAFFYYFKTAT-  
FQPFNTAVAREFFGLFAERLRIVEVLAVPPDRVLDLVDFVALAGTLPTSAQALVGVIACGLCEPNAAGV  
LEADQDWNLHRSMGITLAFYDARES VKKWFDKGLHKPVAQTGLSEAGALTTPFHVAVTAKVCVPAI  
HRVLDLGEIDGSLIELDSAVVVADEEQTLADKPTRDNSVGAVGGVVLATGMNMGANLDSVERGN  
NIIIELEEEGYATVNGKKDGMKLTDKVLMVLSEAYFPVLQRAASANALDRGAFDILLIDVPSDADNRDQ  
GDRL-----PDQYSFISMMIEASLDIMETAEV--  
DYHVLETGSRPPAFRVILIKGLHIRQLAGIAAIIVGSAGRSEVTAYIQG-  
AVPITLRRKTFLPAFAASSCHVIDIFSTMLRPPERSTIQMLILETVael-  
LAVTRGTNDKLERMQVLIPGLDLAELLAEEAAADFPQIVTIEAAIVAILSVAAPVVLREMLLTAEIAV  
DAMALALALLMLTPDQGLTQREQAREAQMKELIQGGVVLQVKAADLMVLAATADKVRLDTHDGT  
TSAFASLNLATVSDGFYVMSSAVLQMGSDLMMIKVARVLADKETKNALVVRHPEQVKTQTTAEGS  
PGMVLQTLTGSIPLAIKAEIEILLWTLVAALWRVKAHLANATRGHTERVLILIALSLITVLLQSEGGGI  
GGG--  
GPAAKILAGFSILTIAKAVGDEVKRVTRRVLDLNSRLGRPEESVNPEFRGAEELEQSKYEAENVEVDTMET  
IRRFVDIPFLVSTRTQHNESEDGRSMVLDVTRVRFIDL-  
VTKRSEIILAAARETDGIIAREMSKDLAALHPEAAALGKIAFLQHFIASDAHIANVYTQEINSVLGMLLL  
VLFINETRIAKVWVPTREVTMVFIMAALATFFIVIGLFSIVFMLS GISWNQMTTIVLGEVMAVRQTS  
TFPADS-  
IGILQNTYADLICAGRVAKADIEKSLHIVVAGRVTRGTWYVIYLYELSQAQGESGIMQRAFRQKTLQS  
LIDGRMEVKIKVVTSDRYA-  
TYEIKGGQHRKGTRYNRVKVGHNIPIAVLPRMKMAFTPPNLVLVKTFGAVVQKRFAQALTHMRHGA  
VAIGPMEVSSPYINSKKARHAPGDAVVDLKPENIVRSVAVPELIWARENEDNGAVHDKYVKTTHKL  
AAKRKKAVDKAQYDHRNQVEMSFIGLAVKVLPAK-----  
-----  
RMRPQLNLAGKTDKKIVKCLNNNLDDVEYGKLGRRKIPITIKSVYDVESRRATELVKLLPYKDDVEGR  
KSQFAEK--  
ALFEPLKAFMMLFGYIARAVYALNLRVIRRTILLAKCKIVVAAGTVLSAIKIVGVSIRLRHKTTNVAETNH  
HIKTIDKRARMTLAGTGKVKLNLSEGRVGKKGGRIGYMPYNNYNIFDGLASGRRAKVKEVAKLKKVD  
KEIKVEGIRAKQEGGRTPKAQLSNSLANTRVGVD-  
VGENVQEESNPRANAEMGQVFAAIDARVYHHVGALIGHALEAVLAIVAIWGIGRAHNLLALKLRINA  
GIELHSAA-VEVAVACA-FAAAAGEASLMVDVSEYPLNMATISAASVDICRLRRRSLSE-----  
-----  
RHGIHAKGTYGKERAMMQILPTKPVKVVVPVFDVDEVELLAPIRAFAETVGDGVTVVKLTDDVKITPFEK  
AVASLAVAGKNTSVIYTVLEKVTQLMKDIYTQRAKAHYGRGRLRSHVTHTKSRRHLSMMKRTVA  
DPSMDAARLTDGEVSVITGATMAFVMSEQDAV--  
GDVDMHFHEEPRREADVGIAGPETFLATEHPRTLAVIFLRAYLLHIVEIQTVKDFSNAATIYDVLAMN  
NKLDRKLSADIATRMLVDNLMEMGVTEVAAKRDAAGDKILSAFWINGVTANADIVLLVANLEVPT

VPENIHCAIRLFYQRVTLQAKERDGDVSVAVVPANKQIEAAEDTVIYSIKGKLPGSAQMKLTVEGISRSI  
VKSFVQLFQVDTFLEDTWLGTLLRAAADVVFDAGDGKEAVDHVVERD TDYEFAPQKDIVSRKIRIY  
TPAAPSAVVIWDP AIEREDKAEAQGTILKIYGNLQDINCFTDIGSEPKIESLKAWDEKEYVVRDDIP  
EDIDTLVGKSSKVNKEFAIPDVAVCAPSKPGVTESIDRGEPKAGTCGEVANMAYPQESLVNAVSSANV  
QKNISMVLAGHPVGEMGISREIERHLETNMCEIFVDKDDIDVALDFSTVALTVLRVGLDPPNARVEIG  
GKESRKLMAVYDGDAPLQRHPKVSAAATGTGI-AGVKATLDDDALELDGVVHGDISFTVTDLPDGRV-  
VTPVFNEVKAQLKIDKVILRAFHVVTLSFSNGKGEDHLIKLRLNALKKNTRHYEMLLKIRETECAESPHAI  
AVGKVLKIDALLQTICKAHYKAIPELLAEDLTALGVMGDQGLLHVVPRLMILAVMHLWG LAAVMELP  
RW-LQEQA-VTNQTMGLSERARHFSY-CISEVVGNTFFAMTKDDDTEQELHARNPI-VLL-  
CGKFGMV-  
ISPSGLKLASTAADPLGRGNKEDLILSTERLQDTMGYYVLKILLVFDRIILAYGSGEDPIKFLVGDQAVT  
GRQNPGMVTLARRTFPLELQRDAVFVMVFADSTMKNLSHRKMHMNLILIKSKGWVNVSTKILISD  
QAIASYAEDVGAHTQPSALAAITSRVMAPIVLVVSQKPTAPSKSLFLEALALYDEVTATVLNAPKKY  
YIFEGDVISVLNKCDAAVLFGMQRPQPDRMRRAMVADAIRLAIALRASGIITRLEEGLINFARAVGLAA  
GIYPEFGAVVMAIIMPEALAFVRNHSVSTKRSPYKGHTKFLHKADVNKSLIAAGVDTIA  
>GCA\_900114675  
AVIKPVTMTQYAPVLMIRQQQVATVSGAGSPSLRAKTVYRKSGLQRKTETKWVSKDFYY-  
GVVKMGNLVQLVSVSDARSVCTVAQLVDQEVVHGMVALEAVKRKIALEEIQGMTAEDPAKVVD  
ASEIELRKFRDAEDRADLLPVLLGLTLKIKFNPHEPLVHDLVPVPVFEVI-  
GIMVQRGQIEVDECGISTALSDVDPIEYVSPIDLEAVAGDKMAYIDQETTVAAVKAEIELEELAESSVL  
VVGI-PLLIPV-FAEDGDV-MSFANRSRDLKTIVNLAVSYPEVQRRALDSA--AAM-  
MERSQAAALAEKRGTAEEIRVVKRMQRSSGLADDPELVMLEDAAEGNSNWAGQIYDDPISGSSES  
SAGNIVYAANKRQNFARSITYLRAVEISDQAAAPLMRGVKHNSKSRSSRKVDDAITALNFSNVPEGIAI  
RAAAGKSRQVLLHDAAEGEEILLIVRWHVTWRTAIIISLFTANNVVGIIELGGIGAVGRKDGLLRHH  
KLNGSLIEQRRVVEKLT LRLRAALKQKIGAEQIIIFVVKVAGDLVANAKVQM---  
SVGTVVAIQGETIFVRRHRQTVISDQEATVEVLKGVAEGPADAQALLRIRVDHTVVKLSVLLIPEVPVLT  
DSVSIREGVGKALQIIQLDVYLLRDMGTGEETLAKSRSMIREVLQVDEITGVRLAFGQLTERQVKGG  
TMKELGTLL--  
ISILDDITEPRMANLPEGVCRTFINAGPRAAVGMIFLLLDEAGKIY AIDGDLRENTKSIKSMIGLVDAAKP  
KTLSAGYATARLKVRFADVHVLES DADLYAYAEERKEVLRMVVYITTEAKRRQLIIFALS LKGGHRRAR  
AALGVMIAAAILESQASQGDVNHAEPNILLDDGEIVGSEMMISRQAALDLKQVIKTDVIVIFEFQEK  
MVVSLKFFCTEVAIFVIALICTVGEMLSREPSHAQEGGAGFQKRIRGHSVLFALSVTFDRRNL RDA---  
NLFLGLGLAAPRYGIFYTEQPKRKQMPSEEDKDKVDGFDLVNAIKEDATKNHELDMP EAMALAVEAD  
GTINVTAGVLALSGDMADVEKVDSKRKMALAVTKWTIAKTIVDLHISGAHPFRCLS-  
IEQADVSAALPAKSI--  
LYLPGANNAEMEEEEKLDGAGASTADAAEDKQKGILLVIPVLVVIQDSNTAGLIANGGLSEWGT MAYK  
KHYALAARMRLHMRTID-----VALEPNKQKAEKIKTVKLEGDTRFRQLATEGVKEQMP-  
LHALNPDFAVRVPVLVTPAVGRVAADESVLGARVPCDASL-  
RELQKSMKGDALPISGIRVLGMRAARAMVDEDIMVAGKVAA-  
LLVIVAETITHIVLMNDSEATLPWRLSVAERLEADTKRAGGFAARPFKSKPSLCKTQAHAKIADPIKEIA  
AGYVAIEERFVFPVEGIPIQLILASPHSRVGS AKRAGLGHLEMAKELQAKAVIMVLSEPDNTTEGLLN  
LTTQOPTDLLFEDCLDVVIDMRRMSV-----  
VQLTTV-  
HVVVAGVRDVGSYEIMAAAAHSGLVQVERVDDRTGRERTLMW MYGAMEELWLMSVTYADWVTD

CAIGAILLHVYQQINRAFSLERLQLAGWPKEATRWNTWQLWLNKDGFFSYEAAFRVKA VLKAE  
LDDYEMSDVEGVGRYQSRQQRLVGYRIRQQVEYEQLDPRTDILLQSLTRLSVIRHALTMVAILIVREV  
VEFT-  
VVAMEDVAKGHVECVLADVDFDTAKDADIGPVGIRTPDPVLGDGTVLKEAVLGKIDLANTVADFRYK  
MLIDGGRELGVSWLSV-  
NLIYERIWVPPAQAAKLNLPVIAFFLGHTELNLDIFAALWAGISKARANKLMAGALIECIENVAADFADP  
EATTHQSKKL RHFKYYGEEVDPVFLAYILDMFSLVATQVTVSDRLLKDRYVLNLKIFRGFTSLLWLSAQI  
GDKGPAATVITVHTIMGLGALVLFILL-  
RAVVLVETLYYKYVYVVM LGYKAAKDVADADPEHFLSLAHASRDVEWIEIIPAFFYYFDTATSRLSKNT  
ALAKEFFGLFEERLRVIDVLAVPPERVEALVDFVALAGTLATSAEATEGVIACDFCEPNAAA VLEADQD  
WNLHRSMGITLAFYDARESVKGWFDKGLHKDVAATGLREASAF TTPFHA-  
DTAKQCVPVVHRVLDLGEVEAALIEIESAVVVADEEQTLADKPTTRENSVGAVGGVVL AGTMNMGS  
NLEAVERGGNIIIELEEEQYSAVNGKKADGKVTDKVLMLVSEAYFPVMKRVASANALDKGAFGLLIDA  
PDDADNRDHGRELTIPAPTVHTESAPLFAESEIERIAWIAPLHLLGTLD AVLGFEPDQYSFISMMIEASL  
EIMETAEVLDDYHVLEKGARPPGFRVILIKGLHIRLLAGICTIIVVGSAGRTEVTAYIQG-  
AVPITLNKSTFLPAFAASSCHVIDIFSTMLRPPERSAIEM LILETVTEL-  
LEVTRIENDKLERLDALLPGLDMAELLELVAAAADFADIVTIDKAITAILSVA AEAVVLREMLLSLAEIAVT  
ALALALALLMLTPDQGLHQKEESREDQMKLLIQGGVVLQVKANERMV LASTADKVRLDTDEGT TSA  
FASLNLATVSDGFYVLSSAVLQMSSDLMMIVAVARVLADKESKNALVVRHPEQVK TQATYAEGSPG  
MVLQTLTTAVPPLAIKPEEVELLWTLVAALWRVKAHLANSTRPIQERV LILILALS LITVLLQSEGGGMG  
GG--  
GPAAKALAAFSILT IKAKAGDEV RKVARRVMDLNSRLGRPEEAVNPEFRGA ELEQTKYEAENVEVDTM  
ETIRRFVDIPFLVSTR TQHNESED RGARMVLDVTRVRFIDL-  
VTKRSEIILAARAETDGIIAREMSKDLAALQSEAAALGKIAALQHFI AVQDGHISNYVTADIHAVLGMLL  
LVLFIQEVRVAKVWVPTRR ETTMVFIMATLAIFFLILGLGVQLVFM LSGISWQQLTTIVLGE GIMVVRQT  
STFPEDS-  
IGILQNTYADLICAGRVAKADIENSLHIVVAGRVARGTWYVIYHYDITQAQDKSGIMQRAFRQMTLSQ  
SLIDGRMEVKIKVVTSDRYA-  
TYEIKGGQHRKGTRYNRVKVGHNIPVQVLPRMKMAFGPPNLVLVKTFGAVVQKRFAQPLTHIRHGA  
VTIGPMEVSSPYIKNKKARHAPGDSVVDLKP DNIVRSVAVPELIWARENEDNGAVHDKYVKTTHKL  
AAKRKKAVDKAQYDHRNQVELSFIGLAVKVLPEKAI VHATSGTLMPTASVAVTEGMKGIAATIRLDPM  
EKALIAYIKRMRPQLNLGGQNDKKVVKCLNNNLLDVEYGKLGRRKIKPITIKSVYDVEHRRATELVKLM  
PYKDDVETRKSQFAEK--  
ALFEPLKAFMMLFGFIARAIYALHLRVIRRTILLVKT KIVVNASTVLSAIIIGVSIRLRHKSTNVADTRHHIK  
TIEARARMTLAGAGKVKNLNLREGKIGKKGRIKGYMPYKNYNIFDGLASGRRAKV KELAKLDVDKTIS  
VDGIRQKQQGGRT PQAELSNAI-  
NTRVGVDIVGENEQEQSNPRANAEMGQIFAAIDARVFSHVGALSGHALAAVLAVVAIW DIGKAHNL  
LAVKLKINAGIEMHSAA- VDAAVAAAAFATNAGEA-  
TLADISESYIGQLALTEASVDVCRLRRRGLQELKKT KDAYMSLTCFSGKGSVKVIVEATQTQAYEIVAT  
RTAERHGIRAKSGYKGERAMMQILPTKPVKVWVPVFVNEDELLAPIRAFAESQGDGVTVVKLT TDIKV  
TMFEKAVASIAVSGKATTVVYTVLEKVTELMKDIIYTORAKAHYGRGRLRSHVTTTKQRRHLSMIKRT  
VIADPSMDAARLTDGEVSVVTGATMAFVMSEQEAV--  
GDVDLHFHEEPRREA EVGIGGPETFLTTEQPRVLALIFLREYLIHIVEIGTVNGFSDAATIYEV LRAMQNK  
LDRKLSADIKIRMVLADNV TDMGVTEVAPRREQAGDKILSAFWINGVPANADIILLVANLEAPCAPE

NIDCAIRLFYQRITLQAKERGGDVSVAVVPASNQIEAAEGTVIYSIKGQTPGTGQMKLNIEGISRSIVKSL  
AVQLFQVDLFLDDTWIATWLRAALDVVFVAAEDGKEAVDHHVVERDTELEFAPQKDIVARKIRIYTPAA  
PSAVVIWDPADREDKAEAQGTILKIYGNLQDINCFTDIGAEPKIESLKAWDEKEYVVRDDIPEDID  
TLVGKSSKVNKEFAIPDVAVCAPSKPGVTESIDRGEPKAGTCGEVANMSYPQESLVNAVSSANVQKNI  
SMVLSGHPVGEMGISREIERHLETNMCEIFVDKSDVDVALDFYIVVLTALRVGLDPPNARVTIDGKESR  
KLMAVEDGDADLQRHPKVSAAAGTG-KAGTKARMEEDTLIVDGVMHGDLSTFTVTDLPEGRV-  
VTPVFNAVKAQLKIDKVKILKAFHVVTLSFSNDKGEEHLVKLRNLALKKNTRHYEMLLKIRETECAESPHA  
ISVGKVLKIDALLQTICQAHYKAIEPLLSDELTA LGVMGEQGLLHIVPRLMILAVLHL-  
PLEIALQLRHWQLQAAA VTDQTMGLAMRDREWSY-AISEVVSNTFYARTKEDDTEQRIRARNPV-  
VLL-LGKFEMI-  
ISPSGLKLQSTLASDMDQGNAEDLILSTERLQDAMEYYLDILLVFVDEVILAYGSGEPIKFLVADQAV  
TGRQNPGMVTLTRRTFPLELQRDATFVMVFEDSTMKNLSHKMHMNLVVIKAGWIVNVSTKILISD  
QAIASYAEDAGAHTQPSALAVITSRVMPIVLVVSQKPTAPSKTLFLEALSLYDEVATVQNKPKKY  
YIFEGDVSVLQKLDAAVLLGMQRPQPD RMRRVAVDAIRLAIALKASGIVTRLQSGLINFSRAVNFT  
AGYYPFSA-----EFRVRNHVDVSTKRSRPYKAHPKFLHKADIDKGLVATGVDTLA  
>GCA\_900115105  
AVIKPVTMNTYAPVLMIAQSQVATVSGAGSPTLRAKTVYAKSGLQRKAETKWVSKDFYY-  
GVVKMGNLVQLVSVISVDNRAVCTVAQLVDQEVVVRGMVALDAVKKKIALEAITGMTAEDPAKVMD  
Y--EIELKKFRDADDRADMLPVMLGLTLKIKFDPHQPLVHDLAIPVVFEVV-  
GVMVQKGTMEVDDCGVSTALSDVDPIVYVSPIDLA AVAGDAMAYIDQEAAVAAKASIDL-  
LALESNVLVVGI-PLLIPV-FEADGDT-MSFANRSRTLKTIVNLAVSYPAIKRA-----IAAAM-  
MDASQAAALAEKKGTAEEIRIVKRMQRSAGLADDPDLVMLEDA AEGNSNWAGQIYDDSLSGSSED  
SAGNIVFAANKRQNFARSITYLRFVEISDQAAAPLMRGVKHNAKSRAARKLDDAIAALNFANVPEGIA  
IRAEAGKSVDLLLHDATEREAILLIVRWHVTWKTAIIVSLFPIAGDVVGLIDVGGIGAVGRKDGLLRH  
HKLNGSLIEQRRITEKTLRLRAALKQKLGQDQIIIFVVKVAGDLVASATVQM---  
AVGAVVAIQGPTIFVRRSRQTVIGDQEATVEILQGVAEGPADAEALLRIRVDHTIVKLSVLLIPQ-  
PVLVESVTIREGVGKALQIIQLDVYLLRDMGTGEETLAKSRSRQFREV LQVDPITGVRLAFGDLRERLV  
KGGTMKELGTLL--  
ISILQGVTEPRMANLPAGVCRTFINAGPRAAVGMLFLLDDAGKIYAIDGDLRENTKSIKSLIGLVDAK  
PKILSAAYATARLKIRYADVHVLISDADLYAYAEERREILRMVPVYIVNAAKRRQLILFALS LKGGHRRAR  
AALGIMIAAAILESQAEQGAVNHEEPVLLDDAEIVGSEMMISRQA ALELKQVF KIDII VVFEFQEKM  
VVSLKFFCTDVAIFVIALICTVGQMLSREPSHAQEGGAGFQKRIRAHSVLFALAATFDRRNLR SADVP  
LFLGLGLAPPRYGIFYTEQPKRKQMPSEADA EKVDGFDLVNAIKEDATSNHELDMP EAMALAVE-  
DATINVNAGVLALTGDMAAVEKVDSKRKMAVAVEKWTISPVELIDIKISGAQPFRALR-  
IEQADV SASLPNKEV-  
FLYLPGANNAELEEELDGAGASTAE AALDKQSAILLVNPVLVVIQDSNSAALIANEGLEEWGT MAYK  
KHYALAARMRLHMR TID----GVAMEPNKQKA EKIKTVKLEGDTRFRQLATEGVKEQMP-  
LHALNPDFAVLIPVLVTPAVGRVAADAGVLGA EVPCDASL-  
RELQKSQKGAALPISGIRVLGMRTARAMVDEDIMVAGKVAA-  
LLVILALETITAI VLMNDSEATLPWRLSVAERLEADTQRSAGYASRPFNSKPSLCKTQAHAKIADPIQEIA  
AGYVATEQRFVFPVEDIPIQLILASTHSRVGS AKRAGTGH LHEMAKELQAKAVIMVQNEPATNTDGLL  
NYLTTQQPTDLLFEDCLDVVIDMRRMSVV-----  
VHLNTV--  
VVVDGVSPVGSYEIMAAA AHSGLVQVERIDERTGRERTLMW MYGAMEELWLLSVTYADWWINCAIG

AILLHVYAQQINRAFSLERLQLAGWPPEASRWWNTWQLWLNKDGFFSYDAAFRA-  
KAVLKADLDDYEMSDVEGVGRYQSRQEIRVGYRIREQVAFEQLDPRTDILLQSKTRLSVIRHALKMVAI  
LIVREIVVEFTMVVAQEDVAMGHVECVLADSFDTAKDADIGPVGLRTPDPVLGDGTVLKEAVLGKID  
LANTVADFRYKMLVDGGRDLGVSWITLQNMLYPRIWLPPAQADLKDLLPICFFLQHPQLNLEMD-  
VIWQ-  
ISKARANKLMAGALIEKILEKIAAFADPEATTHQSKKLRFKYYGEEVDPVYLAYILDVFALVATQVTVS  
DRLLKDRYVLNLKVFRGFTSLLWLSAQIGDKGPCATIITVQTIAGLGALVLFILL-  
RAVVLVETLYYKYVY--  
MLGYQAAKDVADADPEHFLSLAHASRDVEWIEVIPAFFYYFKTATKNLTKNTALAKEFFGLFEERLKIID  
VLAVPPDRVEALVEFVALAGTLTTSATALIGVIACGFCSPNAAAVLEADQDWNLHRSMGITLAFYKAQ  
VSVKKWFDKGLHKDVAEIKLNEAGALTPFHAGSTAKLCVPAIHRVLDLGDVEAALIEIDSAVVVADEE  
QTLADKPTTRENSVGAVGGVVLGTMNMGANLDSVERGGNIIIEEENYNNAVNGKKANGKLTDKV  
LMVLSRAYFPVLKRMASANALDRGAFGLLIDAPDDADNQDHGRSLTIPAPTVAESAPLFAESDIERI  
AWIAPIHLLGTDAVLGFEPDQYSFISMMIEASLDIMETAEVLLDYHVLEKGSRPPSFRVILIKGLHIRQL  
AGICTIIVVGSAGRSEVTAYIQD-  
AVPITLNRKRTFLPAFAASSCHVIDILSTMLRPPERSTIEMLILETVAEL-  
LEVTRIENDKLERMDALLPGLDVAALLGLLAAANDFADIVTIDAAIAAILSVAEEAVVLREMLLTAEIAV  
TALALAMALLMLTRVQGLHQREAAREAQMKALIQQGGTVLQVKATDRMVLASTADKVRLATDEGTT  
SAFASLNLATVSDGFYVMSSAVLQMSSDLMMIVAVARVLADKETKNALVVRHPEQVKTQSTYAEGS  
PGMVLQTLTAAIPPLAIKAEVEELLWTLVAALWRVKAHLANAARPHTERVLILILALSITVLLQSEGGG  
MGGG--  
GPAAKILAAFSILTIIKAKAGEEVRKVTRRVMDLNSRLGRPEEAVNPEFRGAELEQTKYEAESVEVDTMET  
IRRFVDIPFLVSTRTQHNESEDGARMVLDVTRVRFDL-  
VTKRSEIILAARVETDGIIAREMGKDLAALHPEAAALGKIAALQHFAIQDAHISNYVTAEIHAVLGMLLL  
VLFFQEVRSKVWWPTRREVTMVFILAAVALFFLVIGL--  
QIVFMLSGISWNQLTTIVLGEIMLVVRQTGTFPADS-  
IGILQNTYADLVCSGRVAKADIEKSLHIVVGGRRVARGTWYVIYHYDISQAQGQSGIMQRAFRQMTLS  
KSLIDGRMEVKIKVVTSDRYA-  
TYEIKGGQHRKGTRYNRVKIGHNIPVQVLPRMKMAFGDPSLVLVKTFGAVVQKRFAQALTHMRHGA  
VTIGPMEVSSPYISNKKARHAPGDSVVDLKPDNIVRSVAVPELIWARENEDNGAVHDKYVKTTHKL  
AAKRKKAVEKAQYDHRNQVELSFIGLAVKVLPEKAIVHATAGQLMPTASVAVTEGMKGIAATIRLDP  
MEKSLIAYIKMRPQLNLAGQTDKKIVKCLNNNLDDVEYGKLGRRKIKPITIKSVYDVEHRRATELVKL  
MPYKDDVEGRKSQFAEK--  
ALFEPLKAFMMLFGFIARSVYALYLRVIRRTILLVKTKIVVNAATVLSAIIIGVSIRLRHKSTNVAETNHHI  
KTIEKRARMTLAGTGKVKLNLREGKVGMMKAGRIKGFMPYKNFNIFDGLASGRRAKVAELAKLKDVDKT  
ISVDGVRVKQQGGRTPKAQLSNAI-  
NTRVGVDIVGEDEQEASNPRANAEMGQIFAKIDARVFSHVGALKGHAEVLAVVAIWGIGWAHNL  
LAVRLKINAGIEMHSAA-VDAAVAAA-FEQPAGEA-  
AIADVSEGD LGALALTTTSVDVCRLRRRSLSELKKTKEAYMSLTCFGGKGDVKVIVEATQTQAYEIVAT  
RTAERHGIRAKGTYGKERAMMQILPTKPKVIWVPVFVDEVELLAPIRAFAETQGDGVTVVKLTDKVKV  
TMFEKAVASLAVTGKATSVVYTVLEKVTELMKDIIYTQRAKAHYGRGLRSHVVTTKQRRHLSMMK  
RTVIADPSMKAARLTDGEVTVITGATMAFVMSEQDAV--  
GDVDLHFHEEPRREAIEVIGGPGPETFLTDDQPRVLALLALKAYLLHIVEIETTNGFSDAATIIDVLRAMQ  
NKLDRKLSADIKTRMVLTDNVTDMGVTEVAARRNAAGDKILSAFWINGVTANADIILLVANLECP

VPENIDCAIRLFYQRTLQAKERGGDVSVAVVPKQIEAAEGTVIYSIKGKTPGTAQMKLIEGISRSV  
VKSLAVQLFQVDTFLNDTWIATWLRAAQEVFVASEDGKEAVDHVVERDTELEFAPQKDIVSRKIRIY  
TPAAPSAVVIWDPDPAIDREDKAEAQGTILKIYGNLQDINCFTDIGAEPKIESLKAWDEKEYVVRDDIP  
EDIDTLVGKSSKVNKEFGIPDVAVCAPSKPGVTESIDRGEPKAGTCGEVANMAYPQESLVNAVSSANV  
QKNISMVLTGHPVGEMGISREIERHLETNMCEIFVDKADVDVALDFHILALTPLRVGLDQPNARVQID  
GKESRKLMAIQDGAAALQRHPKVS AVTGTG-KAGIKARMPDDALILDGVMHGDITFTATDLPEGRV-  
VTPVFNEVKAQLAIDKVILRGFHVVTLSFSNDKGEEHLIKRLNALKKNTRHYEMLLKIRETECAESPHAI  
SVGKVLKIDKLLQTICKAHYTAIEPLLADDLTALGVMGQQGGLLHVPRMLAVMHMARLEIALQIAG  
WRLQAQAILTDQTMGLAFRARDWSF-AISEVVGNTFFARTKEDDTEQRIHARNPV-VLL-LGKFAMI-  
VSPSGLGLTSTATSPQDRGNAEELILSTERLQDDMGYYVLQILLVFVDMVILAYGSGEDPIKFLVAEQA  
VTGKQNPGMVTLTR-  
TFPLELQRNATFVLVLEDCTMKNLSHKKMHMNLIISKGWVVNVSTKILISDQAIASAEADAGAHTQ  
PSESALAAITSRVMPIVLVVSQKPTAPSKTLFLEALSLYDEVSTVNLNPKKYYIFEGDVVAVLGLTDAA  
VILGMQRPQPKRMRRVVAQAIRLAIAIMASGVITRLEQGLINFARAVSLAVGVYPTLDMLPAAIT-  
DALEFRVRNHDVSTKRSRPYKAHTKFLHKAIEIDKSLIASGVDTLA  
>GCA\_900128995  
AVIKPVTIDDYSPVLMIKQQQVATVSGAGSPTLRAKTVYAKSGLQRKSETKWWAKDFYY-  
GVVKMAKLVLVSISVDNRAVCTVAQLVEQEVVVRGMVALVAVKKKIALDAIEGMTAEDPAKVVDY  
NVRIAIRKFRDADDKADLLPVLLGLTLKIFDPHQPVVHDLPPVPVIFEVI-  
GIMAQKGTIEVDDCAISTAVGDVPINYSPIDLAAVAGDKMAYIDQEAAVAKAKEDIALEELALESN  
VLVVGI-PLIPI-FRDEADE-MSFANRSRTLRTIVDMAVS AVSQTRA----AIASAL-  
MAESQAAALADKRGTAEEIRIVKRMQRSAGLADDPELVVLEDAAEGNSNWAGQIYDDPISGSSES  
AGNIVHAANKRQNFARSITFLRSVEISDQAAAPLMRGVKHNAKSRSSRLDDAIAALNFPNVPEGIAI  
AAAADKPADTLLHEATEGEQILMLIVRWHVTWKTAVLYLMD-  
AGDIVGLITLGGMAGVGRKEGILNRHHKMNGSLIEQKRIIDKLTLLRLRASLKQKLGAEQVILVVRVQG  
DLVAQAEIQMG--DIGAVVAIQGPTIFVRRHRQTIVIGDQEATV-  
VLRGVAQGPADAQALLRIRVDHTLVKLSVLLIPEVPVLVESVTIREGVGKALQIIQLDVYLLRDMGTGEE  
TLAMSKSRELIRELLQIDPITGVRLAFGDLREREAKVLNIKEIDTLF--  
LAIALDLTEPRMANLPEGVCRDFVRAGPRAAVGMLFLILDPAAGRIY AIDGDLREVTKGIKSLIGLVDAK  
PKALS AVYSTERLKVRYEDVRVLTSDADLYAYAEARSELLRMVPVYIVNAAKRRQIVLLALSRLGGHRR  
VRMSIDVMIAAAIIESHADHGTVHHAEPRILLDDAEVVGSEMMISRQAALDLKQLIKTDVIVLFPFQE  
KMVVSRLFFCTDVAIFVIALICTVGAMLSREPATAQESGAGFQKRIRAHSVLFALAVTFDKANLRR---  
GLFLNLGLAPLRYGILYTVQPKRKQMPTEPDKDDLDGFDLVHAVKEDGRD-  
QKLDMPAMALAVEATETINVSGGVLGFDGSMAAVEKVDSKRKMALAVKAWTIAPADVADLSISGA  
DKFRALK-  
IEQADLTAALLHKNLWFLFLPGANNAELEAEKIDGAGSSTVEAAADRNRGILLNPVLVVIQDSNTAAL  
IANDGLDEWGT MAYKKHYAFAARMRLHMRTIDGIEGVVQMEPNKQKNEKIKTVKLEGDTRFRQLAT  
EGVKEQMP-LHALNPDFAVLIPVLVTPAVGRVAADQGVLGARVPCGASL-  
RELQKSQTGDALPISGIRLLGMRAARAMVEEDIMVAGKVAA-  
LLVIVAMETICKLVLLNDSEATLPWRLSVATRLEADTKRAAGFAARPFMSKPSLCNTQAHARIADPIQEI  
AAGYIAREDRFVPVEGLPIQLILSSPHSRVGGAKRAGLGHLEMAKELQGKAVLMVLAASNTNTEGL  
LRYATTRQPTDLLHDDCLDIVIDMRRMSVV-----  
VRLNTV-  
HVLVEGVRDVG DYEIMQAAAASGLVEVEQVDDRTGRERTIMW MYGAMEELWLMSVRYADWIVDC

TIGAIVLHVYAQTINRAFSLERLQLAGWPPEASSWWNTWQLWLNKDGFFGYDAAFRVAVAVLKAEI  
YDYDMRDTDGVGRYQSRQELRVGYRIREQVDFAKLDPRTDILLQSMTRLSVIRHALEVVAIMIVREIVI  
EFTLVVAQEDVAMGHVECVLADAFNFTAKDADIGPVGLKTPDPVLGDGTVLNDVAVLGKIDFANTVA  
DFRYRMIDDGGRELGVWLTQNLLYARIWLPPAAAAALKNLQPICFFLGHPDLNLALLEALWAGISKA  
RAAALMAGALIEKILEKVAADFADPDATTHQSNKAKHFKYYGEEVDPVYLAYILAMFALVATQVTVSDR  
LLTDYVNLNLKVFRGFTSLLWLAAQIGNKGPSATIISLDSVAGLGALVLFILL-RESVLIETLYRYVY-  
VMKGYEAAKDVADADPEHLLNLAAVTRDVEWIEIVPAFFYYFKTAG-  
FQPFNTAVAREFFGLFKERLRIVDVLLVPPDRVMALVEFVALAGTLPTSGSALPGVVACGLCEPNAAG  
VLEADQDWNLHRS LGITLAFYKAQVS VKKWF DKGLHKPVAASGLSEAGALTTPFHVQVTAKVCAPV  
VHRVLDLGEIEGSLIELDSAVVVADEEQTLADKPTRDNSVGAVGGVVLGTMNMGANLDSVERGN  
NIIIEEEEQYATVNGRKDGMKLTDKVLMVLSKAYFPILRRMASANALDRGTGGLLDVPDDADNCD  
QG GEL-----  
PDQYSFISMMIEASLEIMETAEVLDYHVLETGSRPPDFRIILIKGLHIRPLAGVATIIVGSAGRSEVTAYI  
QG-AVPITLRRRTFLPAFAASSCHVIDIFSTMLRPPPERSTIQMLILETVAEL-  
LAVTRGTNEKLERMQVLLPGLDLAELLAELAASDDFPAIVTIEAAIVAILSVA AEPVVLREMLLTAEIAV  
DAMALALALLMLTPDQGLTQRELAREGQMKDLIQGGVVLQIKAADRMVLAATADKVRLDTDDGT  
TSAFASLNLATVSDGFYVMSSAVLQMGSDLMMIKVARVLADKETKNALVVRHPEQVKTQTTAEGS  
PGMVLQTLTGSIPLAIKAEIEILLWTLVAALWRVKAHLANATRPHRERVILILALTITVLLQSEGGGM  
GGG--  
GPAAKILACFSILT IKAKVGEEVRKVTRRVLDLNSRLGRPEESVNPEFRGAELEQSKFEAENVEVDTMETI  
RRFVDIPFLVSTRTQHNESED RGSRMVL DVTRVRFIDL-  
VTKRSEIILAARAETDGIIAREMKGD LAALHPEAAALGKIAALQHYIAISDAHISNYVTAEINSVLGMLLL  
VLFINETRIAKV VWPTRREVTMV FIMAALATFFLVIGL FISIVFMLS GISWNQM TTI VLGEGVM AVRQTS  
TFPKDS-  
IGILQNTYADLICAGRVAKADIEKSLHIVVAGRVTRGTWYVIYLYEISQAQGEAGIMQRAFRQKTLQS  
LIDGRMEVKIKVVTSDRYA-  
TYEIKGGQHRKGTRYNRVKVGHNIPVQVLPRMKMAFTPPNLVLVKTFGAVVQKRFAQALTHMRHG  
AVQIGPMEVSSPYINSKKARHAPGDAVVELKPENIVRSVAVVPELIWARENEDNNAVHDKYVKTT HK  
LAAKRKKAVDKAQYDHRNQVEMSFGLAVKVLDPKAIVHATAGMLMPTASVAVTEGMKGIAATIRL  
DPMEKALIAYIKRMRPQLNLAGKTDKKIVKCLNNNLDDVEYGKLGRRKIPITIKSVYDVESRRATELVK  
LLPYKDDVEGRKSQFAEK--  
ALFEPLKAFMMLFGYIARSVYALNLRVIRRTILLVKCKIVVAAATVLSAIVGV SIRLRHKSTNVAETNHH  
IKTIEKRARMTLAGAGKVKNLSEGRVGKKGGRIGKGYMPYNNYNIFDGLASGRRAKVKEVAKLKKVVK  
EIKVEGIRAKQEGGRTPKPQLSNAIANTRVGVD-  
VGENVQEE SNPRANAEMGQIFAKIDARVYSHVGALIGHALEAVLAVVAIWGIGRAHNLLALRLRVNA  
GIELHSAA-VEVAVACA-  
YAAPAGEASLMVDVSEAYLQALLITADAVDVCRLRRRSLSELKTKKDAYMSLT CFAGKGD RVKVVEA  
AQ TQAYEIVATRTAERHGIHAKGTYGKERAMMQILPTKPVKVVVPVFVDEVELLAPIRAFAETVGDG  
VTVVKLTTDVKITMFEKAVASLAVSGKNTSVIYTVLEKVTQLMKDIYTQRAKAHYGRGRLRSHVVHT  
KSRRHLSMMKRTVVADPSMDAARLTDGEVSVVTGATMAFVMSEQDAV-  
PGDVKMHFH EEPREAEVGIAGPETFLATEHPRVLAVLFLRAYLIHIVEIQTVKDFSNAATIYDVL RAMA  
NKLDRKLSADIAKTRMVLADNLMEMGVTEVAARREAAGDPILSSY WINGVTANADIVLLVANLEVPT  
VPENIHCAIRLFYQRVTLQAKERGGDVSAVVPANKQIEAAEDTVIYSIKGKLPGSAQM KLTVEGISRSI  
VKTLAVQLFQVDTFLDDTWLGTLLRAAMDVVFVDAGD GREAVDHHVVERDTEFEFAPQKDIVSRKIRI



YTPAAPSAVVIWDPAIEREDKAEAQGTILKIYGPNLQDINCFTDIGSEPKIESLKSWEDEKEYVVHRDDI  
PEDI-  
TLVGKSSRVNKEFAIPDVAVCAPSKPGVTESIDRGEPKAGTCGEVANMAYPQESLVNNVSSANVQKN  
ISMVLAGHPVGEMGISREIERHLETNMCEIFVDKADIDVALDFSTLALTVLRVGLDPPNARVQIGGKES  
RKLMAVNDGDAPLQRHPKVSEAAGGQ--AGVKATLEDEALELDGVVHGDITFTLTDLPEGRV-  
VTPVFNSVKAQLKIDKVLKAFHVVTLSFSNGKGEDHLIKRLNALKKNTRHYEMLLKIRETECAESPHAI  
AVGKVLKIDKLLQTICVAHYKAIEPLAADLTALGVMGEQGLLHVVPRLMILAVMHLWGLEAAMELRR  
WDLQAARCVTDQTMGLATRARRHYSY-CISEVVGNTFFAMTKEDDTEQELHARNPI-VLL-  
CGKFGMV-  
ISPSGLRLGSTAPTPLGRDNREDLILSTERLQDNMSYYVLQILLVFVDRVILAYGSGEAPIKFLVGDQAV  
TGRQNPGMVTLARRTFPLELQRDAVFVMVFADSTMKNLSHRKMHMNLVLIKSGWVVNVSTKILIS  
DQAIASYAEDVGAHTQPSESALAAITSRVMAPIVLVVSQKPTAPSKSLFLEALALYDEVTATVLNAPKK  
YYIFEGDVISILGACDAAVLLGMQRPQPDRMRRAMVADAIRLAIALRAAGIVTRLEDGLINFARAVGLA  
AGVYPDFGALVMAVIMPDALAFVRNHAVSTKRSPYKGHTKFLHKADV NKS LIAAGVDTIA  
>GCA\_900129845  
AVIKPVTMPVYAPVLMIRQQQVATVSGAGSPSLRSKTVYAKSGLHRKDETKWVAKPLYH-  
GVLKLG NIVQLVSISVDNRAVCTVAQLVEQEVVVHGMVALEVVKKKIALEAIEGMTAEDPAKVVDY--  
EIALKKFRDADDRADLLPVMLGLTLKIKFDPHQPVIHDLPIPIYIEVV-  
GIMAQKGTIEVDDCAISTAVSDVDPIQYVSPIDLEVLAGDQMAFIDQEA AVAAAREAI ALEELAESGV  
LVVGI-PLLIPV-FEADGDT-MSFANRSRTLKTIVNMAISYEHLNRARLELAIAAAM-  
MEQSQAALAEKRGTAEEIRIVKRMQKSAGLADDPELVMLDDAAEGNSSWAGQIYDDPISGSSED  
SAGNIVHAANKRQNYARSITHLRAVEISDQAAAPIMRGVKHNAKRSARKLDDEIAELNFPNVPGV  
AIKAESDKPKSTLLHDATEGEQILMLIVRWSVTWKTAIMIFLLS-  
ADDVVG LIEIGAIGAIGQKDGLLNRHHKLNGLSIEQKRVVEKLT LRLRAALKQKL GANNV IIFVVKVAG  
DLVASAKVQM---SVGTVVAIQGPTIFVRRSRQT VIGDQEATV-  
VLKGVAEGPADAQALLRIRVDHTLVKLSVLLIPEVPVLVESVTIREGVGKALQIIQLDVYLLRDMGTGEE  
TLAKSQSRELIREMLQVDPITGVRLAYGGLRERESKALSIKEIDTML--  
LAIVKHITEPRMENLPAGVCRTFIEAGPRAAVGMLFLLDDAGKIYEIDGDLRENTKSIKSMIGIVDAAKP  
KALSAGYATTRLKLRYADVYVLLSDADLYAYAEERKEVLRMVPVYITNAAKRRQLIIFALSLKGGHKKRAR  
AALDVMIAAAILESQAENAHVNHEEPEILLDDAEVVGSEMMISRQSALEVQVQIKIDVIVIFPEFQEKM  
VVSLKFFCTEVAIFVIALIVTVGQMLSREPSHAQEGGAGYQKRIRAHSILFALAAMFERSNLRDA--  
PDLFMGLGLASPRYGIIYVSQPKRKQMPSEPDRDRVDGFDLVHAVKADTTKNHELDMP EAMALAVE  
-DATINVNAGVLATKGEMTDVEKVDSKRKMSLAVEKWNI AKLDVIDVNISGAYPFRSLE-  
IEQADISAALHKKDIWFLFLPGANNADMEEEKLDGAGASTAEVAEDKQTGILLVNPVLVVIQDSNTAS  
LIANDGLEEWGT MAYKKHYALAARMRLHMRTIDAIEVGVVMEPNKQKAEIKTVKLEGDTRFRQLAT  
EGVKEQMP-IHALNP DFAV-LPVLVTPAVGRVAADESVLGADVPCDFSL-  
RELQKSQKGKALPISGIKVLGMRAARAMIEEDIMVAGKVAA-  
LLAIGAVETILEIVLMNDSEATLPWRLSVAERLEADTKRASGFASRPFSKPSLCKTQAHAKVADPIQEI  
AAGYVAAEERFVFPVEGIAIQLILASPHSRVGGAKRAGIGHLHEMAKELIGKAVLMVLNAPDTNTEGLL  
NYLT TNQPTDLLFEDCLDVVIDMRRMSVV-----  
VHINTV-  
HV VVKGVAEVDYEIMAAAFPSGLVQVERVDDRTGRERTIMW MYGAMEELWLNSVTWADWVQQ  
VQIGAILHVYAHAINRAFSLERLQIAGWPKEASHWWNTWQLWLNKDGGFFGYDAA FRA-  
AAVLKSDLYDYEMSDVEGVGRYQSRQELRVGYRIREQVSYARLDPRTDILLQSQTRLSVIRHALDMVA

ILIIRDIVAEFTLVVAMEDVAMGHVECVLADCFDFTKKNADIGPVGIRTPDPILGDGTVMKEAVLGKIDL  
ANTVADFRYKILVDGGRELGVWLSI-NMLYERIWLPPAQAALKDLTPIRFFLSHPEINV-----  
ISKARADRLMAGALVEKILENIAAFAEPEATTHQSNKERHFKEYGEEVDPVFLAYIFDATALVSTQVTVS  
DRLLKDRYVLNLKVFRLTSLWWSLQIGNKGPAATITLGTVAGLGALVLFILL-  
RQSVIETLYFRYVYV-  
MRGYEAAKDVADAEPEHFLILASASRDVEWIIQIIPAFFYYFDTATSNLTKNTALAREFFGLFAERLRVIV  
VLVPPERVLELVEFVALAGTLSTSAEALVGVIACEFCEPNAAEVLEADQDWNLHRSMGITLAFYDARE  
SVKGWFDKGLHKDVAETGLSEAGALTTPFHAGEEAKRCVPAVHRVIDLGEIAAALIEIDSAVVVADEE  
QTLADKPTRDNSVGAVGGVVLAGTMNMGSNLDSVERGGNIIIEEEEQYSAVNGKKADGKMTDKV  
LMVLSKAYFPVITGFTSGNALDKGVINVLQAPSDADNQDHGQGLTIPAPTIHAETAPLFAEADIERMA  
WVAPMHMLGTLDAVLGFEPDQYSFISMMIEASLDIMETAEV--  
DYHVLTKGSRPPAFRVILIKGLHIRLLAGIGTIIVVGSAGRSEVTAYIQG-  
AVPITLTKVTFLPAFAASSCHADIFSTMLRPPERSAIEMLILETVAEL-  
LEATRIENDKLERLDALLPGLDLAVLLELVAAAADF AKIVTIDKAI AAILSVA AEAVVLR ELLLT LAEIAVTA  
LALAMALLMLTRDQGLTQKETSREGQMKELIQGGVVLQVKAADKMMLASTADKVRLDTDEGTTSA  
FASLNLATVSDGFYVLSSAVLQLSSDLMMIVSVARVLADKEAKNALVVRHPEQVKTQATYAEGSPGM  
VLQTLTGSPPLAIKSEDVELLWTLVAALWKVKAHIANAARPRLERVLILILASSLIAVLMQSEAGGLGG  
G--  
GAAAKLIAGFSILTIIKAKAGDEVKVARVM DLNSRLGRPEEAVNPEFRGAELEQTKYEAENVEVDTM  
ETIRRFVDIPFLVSTRTQHNESEDGRSRMVL DVTRVRFIDL-  
VTKRSEIILAARAETDGIISREMQDLQALQAELAALGKIAALQHFI AVSDGHISNYVTADINSVLGMILL  
VLFINETRISKVWVPTRRREV TMVFIMAA LAVFFLVIGLG-  
QIVFMLSGISWQQLTTIVLGEGVMAVRQTGTFPADS-  
IGILQNTYADLICSGRVAKADIEQSLHIVVAGRVSRGTWYVIYHYEITQAQQNSGIMQRAFRQATLSQ  
SLIEGRMEVKIKVVTDDRYA-  
TYEIKGGQHRKGTRYNRVKVGHNIPVQVLPRMKMCFGPPNLVLVKTFGAVVQKRFAQPLTHIRHGA  
VTIGPMEVSSPYIKNKKARHAPGDSVVDLKP DNILRSVAVVPELIWARENEDNNNAVHEKYVKTTHKLA  
AKRKKAVDKAQYDHRNQVALSFIGLAVKVLPEKAI VHATAGQLMPTASVAVTEGMKGIAATIRLDPM  
EKALIAYIKRMRPQLNLGGQTDKKIVKCLNNNLDDVEYGKLGRRRIKPITIKSVYDVEHEEGTELVKLMP  
YKDDVETRKSQFAEK--  
ALFEPLSAFMMMF GFIARAVYALSLRVIRRTILLVKTKIVVNASTVLSAIIYIGISIRLRHKSTNVAETNHHI  
KTIEDRARM TLAGAGKVKLNL RPKGVGVKAGRIKGYMPYKNFNIFDKLESGRRAKV KALAKLKEVDKTI  
SVDGIRQKQ-GGRTPQADLSNAV-  
NSRVGVDIVGESEQEESNPRANAEMGQIFAKIDARVYSHVGALVGHALTAVLAVCSIWGIGKAHNLL  
AVKLKINAGIEMHSAA-  
VEAAVAAA AFADNGGEASIIADISEAYLGVLMTETGIDVCRLRRRGLAMLKKTKKDAYMSLTCFGGK  
GDKIKIVEASQTQAYEIVATRTAERHGIIKAGTYGKERAMMQIVPSKPVKVVVPIFVPEPELLAPIRAFA  
ETVGDGVTVVKLTTDIKVTPEKAVASIAVTGKSTSVVYTVLEKVTQLSKDIIYTQRSKAHYGRGLRSH  
VVTTTKQKRHL SMMKRTVVADPHMSAARLTDGEVSVVTGATMAFVMSEQDAV---  
DADLHYHEEPRREAALGIAGPETFLTTEHPRVLALIFRAYLIHIVEIDTEKGFADAATIEVLRAMQNKL  
DRKLSADIAKIRMV LADNVANMGVTDVAPRREEAGDKILSAFWINGVPANADIILLVANMEVPCVPE  
NIDCAVRLFYQRITLQAKERGGDVSVALVPAQNQIEAAEGTVIYSIKGQTPGTSQMKNIEGISRSIVKS  
LATQLFQVDTFLNDTWLGTLLRAAEDVIFVDAGDDKEAVDHHVVERDTLLEFAPQKDIVARKIRIYTPAA  
PSAVVIWDP AIDREDKADAQG TILKIYGP NLQDINCFDIGAEPKIESLKAWDEKEKYVVHRDDIPEDIT

TLVGKSSKVNKEFAIPDVAVCAPSKPGVTESIDRGEPKAGTCGEVANMSYPQESLVNQVSSANVQKN  
ISMVLGGHPVGEMGISRGIERHLETNMCEIFVDKSDIDVALDFHILRLTAQRVGLDAPNAKVQIDGKES  
RKLMAVQDGDADLQRHPKISEATGTGLGAGIKARMPDDTLILDGVMHGDISFTATDLPEGRV-  
VTPVFNAVKAQLKIDKVMLKEFHVVTLSFSNDKGEEHLVKLRNLNKKSTRHYEMLLKIRETECAESPH  
AISVGKVLKIDALLQTICVAHYKEIEPLLADDLTALGVMGEQGLLHVPRMLILAVMYAL-  
LELALAVAHWGLQAEASVTDQNLGLQIRERAWTY-AISEVVGNTFFARTKDDDEQRIHARNPI-  
VLL-YGKFGMT-  
ISPSGLGLESTPASDQEENRNDLILSSERLQDQMYYYYILRILLVFVDEVILAYGSGGAPIKFLVADQAV  
TGRQNPGMVTLTRRTFPLELQRDATFVLVFEDSTMKNLSHRKMHMNLVLIKSGWIVNVSTKILISDQ  
AIASYAEAGAHTQPSESALAVITSRVMAPIVLVVSQKPTAPSKTLFLEALSLEYEVTATVLNPKPKYYIF  
EGDLVSVLNQLTAALLIGMQRPQPD CMRRAVIAQAIRLAIALKASELAQRLDDGLINFRAVSLAAGL  
YSALDMLPVAIIT-EAIAFRVRNHKTSTKRDRPYKGHTKFLHKADLDKGLVANGVDTVA  
>GCA\_900143545  
AVIKPVTMDTYAPVLMIRQQQVATVSGAGSPTLRAKTVYRKSGLQRKAETKWVSKDFYY-  
GVVKLGNIVQLVSISVDKRSVCTVAQLVDQEVVVHGMVALEAVKKKIALEAIEGMTAEDPAKVVDY-  
SEIELRKFRDADDRADLLPVMLGLTLKIRFDPHEPLVHDLPIPVVFEVV-  
GIMVQRGQIEVDECGVSTALSDVDPIVYVSPIDLA AVAGDQMAYIDQEAAVTA AKA AIELEEALESS  
VLVVGI-PLLIPV-FETDGDV-MSFANRSRTLKTIVNLAVSYPAIKRA-LDSA--AAM-  
MGQSQAAAALAEKKGTAEEIRIVKRMQRSSGLADDPDLVMLEDA AEGNSNWAGQIYDDPISGSSESD  
SAGNIVFAANKRQN FARSITYLRAVEISDQAEAPLMRGVKHNAKSRTSRKVND AIAVLNFPNVPEGIAI  
RAEAGKTGDILLHDATEGEEILL-----  
LNRHHKLNGSLIEQRRIVEKLT LRLRVALKQKIGKEQIIIFVVKVAGDLVANAKIQM---  
SVGTVVAIQGETIFVRRHRQTVIADQEATV-VLRGVAEGPADAQALLRIRVDHTVVKLSVLLIPE-  
PVLTESVTIREGVGKALQIIQLDVYLLRDMGTGDETLAKSKS-----  
-----  
IAILENITEPRMANLPDGVCRTFVNAGPRAAVGMIFLLDDAGKIYTIDGDLRENTKSIKSMIGIVDAAK  
PKTLSAGYATARLKVRYADVMVLTSDADLYAYAEERKEVLRMVPVYITNAAKRRQLIIFALS LKGGHRR  
ARAALGVMIAAAILESQAEEGSVNHEDHAVLLDDGEIVGSEIMISRQAALDIKQIIKTDIIVIFPEFQEKM  
VVSLKFFCTDVAIFVIALICTVGDMLSREPSHAQEGGAGFQKRIRGHSVLFALAVTFDRRNLRGTDA-  
DLFLDLGLAAPRYGVLYTEQPKRKQMPSEEDKEKVDGFDLVNAIKSDTTKNHELDMP EAMALAVE-  
DGSINVNAGVLAMTGDMAAVEKVDSKRKMALAVEKWTISRSDIVDIKLSGAHPFRALS-  
VGQADVSAALGHKQI-  
FLFLPGANNAEMEEAKLDGAGSSTA EAAADDKQLGILLVKPVLVVIQDSNTASLIANGGLEEWGT MAY  
KKHYAFAARMRLHMRITD----GVVMDPNKQKAEKIKTVKLEGDTRFRQLATEGVKEQMP-  
LHALNPDFAV-LPVLVTPAVGRVAADADVLGADVPCDASL-  
RELQKSMKGDALPISGIRLLGMRGARAMVDEDIMVAGKVAA-  
LLVIVAAETILHIVLLNDSEATLPWRLSVAERLEADTKRAAGYAARPFKSKPSLCKTQAHAKIADPIQEIA  
AGYVATEERFVFPVEGIPIQLILASPHSRVGEAKRAGLGH LHEMAKELQAKAVIMVLNEPDTNTEGLLN  
YLTTQQPTDLLFEDCLDVVIDMRRMSVV-----  
VQLNTV-  
HCMIPGTSDLADREIMAAAAHSGLVQVERVDDRTGRERTLMW MYGAMEELWLLSVRYADWV VDC  
AIGAILLHVYAQNINRAFSNLRLQLAGWPKEATRWWNTWQLWLNKDGFFGYDAA FRA-  
KAVLKSELDDFEMSDVEGVGRYQSRQQRLRVGYRIRQQVAFEQLDPRTDILLQSMTRL SVIHHALD VV  
AILIVREV VVEFTLVVAMEDVAMGHVECVLADSFDTAKDADIGPVGIRTPDPVLGDGTVLKEAVLGKI

DFANTVADFRYKMLTDGGRQLGVSWVTLQNLLYARIWLPPAHAALKNLVPIAFFLGHTELNLAIFTEL  
WAGISKARANKLMAGALIEKILEKVAADFADPEATTHQSKKLRFKYYGEEVDPVYLAYIFQQTALVATQ  
VTVSDRLLKDRYVNLKIFRGFTSLLWLSAQIGDKGPAATVITVQTIMGLGALVFIILLRVVVLVETLYF  
KYVY--  
MLGYQAAKDVADADPEHFLSLAHASRDVEWIEVVPAFFYYFKTATSRLSKNTALAKEFFGLFQERLRIV  
DVLVPPERVEALVEFVALAGTLATAAKVLPRVIACGFCEPNAAAULEADQDWNLHRSMGITLAFYD  
ARESVKGWFDKGLHKDVAATGLREAGALTPFHAGVTAKQCVPAIHRVLDLGEVEAALIEIDSAVVVA  
DEEQSLADKPTTRENVS GAVGGVVL AGTMNMGANLDSVERGGNIIIEEEEQYSAVNGKKS DGKVT  
DKVVMVLSAAYFPVLKRIASANALDKGAFGLLIEAPDDADNKNKHGRGLTIPAPTVHAESAPLYAESEIE  
RIAWIAPLHLLGTLDAVLGFEPDQYSFISMMIEASLEIMETAEV--  
DYHVLEKGARPPSFRVILIKGLHIRLLAGVCTIIVVGSAGRAEITAYIQG-  
AVPITLNKQTFLPFAFAASSCHVIDIFSTMLRPPERSAIEMLILETVAEL-  
LEVTRIENDKLERMEALLPGLDASALLQLVAAAKDFASIVTIDQAITAILSVAEEAVVREMLLSLAEIAV  
TALALALALLMLTPDQGLHQKEAAREAQMKALIQQGGVVLQVKAADRMMLASTADKVRLDTDEGT  
TSAFASLNLATVSDGFYVLSSAVLQMSSDLMMIVAVARVLADKETKNALVVRHPEQVKTQSTYAEQS  
PGMVLQTLTQAIPPLAIIKAEDVELLWTLVAALWRVKAHLANAARPHTERVLVILALALITVLLQSEGG  
GMGGG--  
GPAAKLLAAFSILTIIKAKAGDEVKVARVMMDLNSRLGRPEEAINPEFRGEELEQSKYEAENVEVDTME  
TIRRFVDIPFLVSTRTQHNESEDRGARMVLDVTRVRFIDL-  
VTKRSEIILAAARETDGIIAREMGKDLAALHPEAAALGKISALQHFIQDAHISNYVTATIHAVLGMILL  
VLFIQEVRSKVVWPTRREVTMVFIMAALAVFFLVIGL--  
QIVFMLSIGISWNALTTIVLGEIMVVRQTNTFPEDS-  
IGILQNTYADLICSGRVAKADIEASLHIVVAGRVARGTWYVIYLYEISQAQDQSGIMQRAFRQMTLSQ  
SLIDGRMECKIKVVTSDRYA-  
TYEIKGGQHRKGTRYNRVKVGHNIPVQVLPRMKMAFGPPNLVLVKTFGAVVQKRFAQALTHIRHGA  
VTIGPMEVSSPYISNKKARHAPGDSVVDLKPDNIVRSVAVPELIWARENEDNGAVHDKYVKTTHKL  
AAKRRKAVDKAQYDHRNQVELSFIGLAVKVLDPDKAIVHATSGALMPTASVAVTEGMKGIAATIRLDP  
MEKALIAYIKRMRPQLNLGGQTDKKIVKCLNNNLDDVEYGKLGRRKIPITIKSVYDVEHRRATELVKL  
MPYKDDVETRKSQFAEK--  
ALFEPLSAFMMMFGFIGRAVYALYLRVIRRTILLVKTIVVNASTVLSAIIIGVSIRLRHKSTNVAETKHHI  
KTIEARARMTLAGAGKVKLNLSPGKIGMKGGRIKGYMPYKNFNIFDGLASGRRAKV/KELAKLSVDKSI  
TVDGIRTKQQGGRTPKAQLSNAIAKTRVGVDIVGENEQEESNPRANAEMGQIFAKIDARVFSHVGALI  
GHALEAVLAVVAIWQIGRAHNLLAIRLKNAGIELHSAA-VDVAVAAAAFAQNAGEA-  
VVADISEAYLGALALSEMSVEVCRLRRRRLNELKTKKDAYMNLTCFGGKGDKVKIIEATQTQAYEIVA  
TRTAERHGIRAKGTYGKERAMMQITPTKPKIVVPVVFVNETELLAPIRAFAESTGDGVTVVKLTTDVKV  
TMFEKAVASIAVTGKATSIVYTVLEKVTLMKDIIYTQRAKAHYGRGLRSHVTTTKQRRHLSMIKRTV  
VADPSMDASRLTDGEVSVITGATMAFVMSEQDAV--  
GDVRLHFHEEPSREADLGIGGPETFLTTEQPRVLALLFLRAYLIHIVEIGTTNGFSDAATYDVLAMQN  
KLDRKLSADIAKVRMVLSDNVTSMGVTDQAPRREAAGDKILSAFWINGVTANADIILLVANLEAPCVP  
ENIDCAIRLFYQRTLQAKERGGDVSAIVPAANQIEAAENTVIYTIKGKEPGTGQMKLITIEGISRSIVKSF  
AVQLFQVDTFLDDTWIATWLRAALQVVFVGAEDGKEAVDHVVERDTELEFAPQKDIVARKIRIFTPAA  
PSAVVIWDPAIEREDKAEAQGTILKIYGPNLQDINCFTDIGAEPKIESLKAWDEKEYVVRDDIPEDI-  
TLVGKSSKVNKEFAIPDVAVCAPSKPGVTESIDRGEPKAGTCGEVANMSYPQESLVNTVSSANVQKNI  
SMVLSGHPVGEMGISREIERHLETSMCEIFVDKDDVDVALDFHIVALTALRVGLDPPNARVQIDGKES

RKLMAVQDGEADLQRHPKVSQATGTGLKAGVKARMPDDNLILDGVMHGDVSFTATDLPEGRV-  
VTPVFNEVKAQLKIDKVILKAFHVVTLSFSNDKGEEHLVKLRLNALKKSTRHYEMLLKIRETECAESPHAI  
SVGKVLKIDALMQTICEAHYKAIEPLLADeltaLGVMGEQGLLHIVPRLMIL--MHL-  
GIAVAHQIQKWGLQAAAVITDQTMGLALRDRDWSF-AISEVVGNTFFARTKADDTEQKIQARNPV-  
VLL-LGKFQMI-  
ISPSGLKLASTAASDIEEGNQEELILSTERLQDAMEYFIVDILLVFVDEVILAYGSGDDPIKFLVAEQAVTG  
RQNPGMVTLTRRTFPLELQRNATFVMVFEDCTMKNLSHKKMHMNLVVIKSGWIVNVSTKILISDQA  
IASYAEDAGAHTQPSSESALAVITSRVMAPIVLVVSQKPTAPSKTLFLEALSLYDEVSTATVQNPKPKYYVF  
EGDVVSVLDPLDAAVLLGMQRPQPDRMRRAVVAEAIRLAIALQASDIVTRLEEGLVNFSAVNFAAR  
YY-IQAAP-----EFRVRNHVDVSTKRSRPYKAHPKFLHKAEVDKSLIATGVDTLA  
>GCA\_900156505  
AVIKPVTMDAYAPVLMIRQQQVATVSGAGSPTLRAKTVYAKSGLQRKSETKWVSKDFYY-  
GVVKLGNIVQLVSISVDKRAVCTVAQLVDQEVVVRGMVALEAVKKIALEAIQGMATAEDPAKVVDYA  
SEIELRKFRDADDRADMLPVLLGLTLKIKFDPHQPVVHDLPIPVVFEVV-  
GIMVQRGQIEVDECAISTAISDVDPVIVVSPIDLAAGVAGDKMAYIDQEAANAKQEIIDLEELAESSV  
LVVGI-PLLIPV-FAADGDV-MSFANRSRTLKTIVNLAVSYPEIKRA-----IAAAM-  
MDASQAAAAAEKRGTAEEIRIVKRMQRSSGLADDPELLMLEDAAEGNSNWAGQIYDDPISGSSES  
AGNIVYAANKRQNFARSITYLRAVEISDPAAAPLMRGVKHNSKSRARKVDDAIAALNFPNVPEGIAI  
RAAAGKPRDLLLHDATEGEEILLIIVRWHTWKTAVIISLFPLADNVVGITMGGIGAVGRKDGLLNRH  
HKLNGSLIEQRRIEKLTLRLRAALKQKLGAEQIIIFVVKVAGDLVAKAKVQM---  
SVGTVAIQGETIFVRRHRQTVIADQEATV-ILKGVAEGPADAQALLRIRVDHTVVKLSVLLIPD-  
PVLTESVSIREGVGKALQIIQLDVYLLRDMGTGEETLAKSRSEVIREVLQVDDITGVRLAFGQLRERLVK  
GGTMKELG-----  
IAILKDITEPRMANLPAGVCRTFVNAGPRAAVGMIFLLLDEAGKIYTIDGDLRENTKSIKSMIGLVDAK  
PKTLSAGYATTRLKIRYADVTLTSDADLYAYAEERKELLRMVPVYITNQAKRRQLIIFALS LKGGHRA  
RAALGVMIAAAILESQAEQGAVNHAEPVLLDDGEIVGSEIMISRQAALDLKQIIKTDIIVIFPEFQEK  
VVSLKFFCTDVAIFVIALICTVGEMLSREPSHAQEEGAGFQKRIRAHSVLFALAVTFDRRNLRTD-  
TPTFLNLGLAPPRYGIFYTEQPKRKQMPSEADDDEVDGFDLVNAIKEDGTK-EELDMPEAMALAVE-  
DGTINVNAGVLAMSGDMAAVEKVDSKRKMALAVDKWTIARVDIVDLKISGAAPFRALN-  
IEQADVSATLSNKQV-  
FLFLPGANNAEMEEAKLDGAGSSTAEEAADKQLGILLINPVLVVIQDSNTAGLIANGGLEEWGT  
MAYKKHYALAARMRLHMRTID----GVEMDPNKQKAEIKTVKLEGDTRFRQLATEGVKEQMP-  
LHALNPDAFVLPVLPVTPAVGRVAADADVLGARVPCDASL-  
RELQKSMKGNALPISGIRLLGMRAARAMVDEDIMVAGKVAA-  
LLVIVAVTTITHIVLRNDSEATLPWRLSVAERIEADTKRASGFAARPFKSKPSLCKTQAHQAQIADPIQ  
EIAAGYVATEGRFVFPVEGIPIQLILASPHSRIGAAKRAGEGHLHEMAKELQAKAVIMVLNEPDTNTEGL  
LLNYLTQQPTDLLFEDCLDVIDMRMSVV-----  
VQLNTV-  
HVLVPGVRDLADREIMAAAAHSGLVQIERVDERTGRERTLMWMYGAMEELWLMSIRFADWVWDC  
AIGAILLHVYAQQINRAFSLERLQLAGWPMEATRWWTWQLWLNKDGFFSYEAAFRAVKAVLKAD  
LDDFDMSDVEGVGRYQSRQQLRVGYRIRQQVAFEQLDPRTDILLQSMTRLVIRHALTMVAILIVREV  
VVEFTLVVAKEDVAMGHVECVLADSFDTAKDADIGPVGIRTPDPVLGDGTVLKEAVLGKIDLANTVA  
DFRYKMLIDGGRELGVSWVTLQNLIIYKRIWVPPAQAAALKNLVPIAFFLGHTELNLDIFPALWAGISKAR  
ANKLMAGALIEKILEKVAAFANPEATTHQSKKIRHFKYYGEEVDPVYLAYILDMFALVATQVTVSDRLL

KDRYVLNLKIFRGFTSLLWLSAQIGDKGPAATVITVQTIMGLGALVLFILL-RVVVLVETLYYKYVY--  
MLGYQAAKDVADADPEHFLSLAHASRDVEWIEVIPAFFYYFKTATSRLSKNTALAKEFFGLFKERLRVID  
VLAVPPDRVEALVAFVALAGTLVTSAQALAGIACG-  
CEPNAAAVLEADQDWNLHRSMGITLAFYDARES VKGWFDKGLHKDVAATGLREAGALTTPFHAGA  
TAKQCVPAIHRVLDLGEVEAALIEIDSAVVVADEEQTLADKPTTRENSVGAVGGVVLAGTMNMGAN  
LDSVERGGNIIIEEEEQYSAVNGKKSDGKVTDKVVMLVLSAAYFPVLKRMASANALDKGAFGLLIDAP  
DDADNKDHGRELTIPAPTVHAESAPLYAESEIERIAWIAPLHLLGTLDVAVLGFEPDQYSFISMMIDASLE  
IMETAEVLDYHVLETGSRPPGFRVILIKGLHIRLLAGVCTIIVVGSAGRTEVTAYIQG-  
AVPITLNKKTFLPAFAASSCHADIFSTMLRPPERSTIQMLILETVAEL-  
LEVTRIENDKLERMFALLPGLDVASLLDLVAAATDFAAIVTIDQALTAILSVAEEAVVREMLLTAEIAV  
TALALALALLMLTPDQGLHQKEQAREAQM KALIQQGGVVLQVKAADRMMLASTADKVRLDTDEGT  
TSAFASLNLATVSDGFYVLSSAVLQMTADLMMIVAVARVLADKETKNALVVRHPEQVKTQSTYAEGS  
PGMVLQTLTGAIPLAIKPETVELLWTLVAALWRVKAHLANAARPHNERVLILIALSLITVLLQSEGGG  
MGGG--  
GPAAKALAAFSILTIIKAKAGDEV RKVARRVMDLNSRLGRPEEAVNPEFRGAELEQSKYEAENVEVDTM  
ETIRRFVDIPFLVSIRTQHNESEDRGARMVLDVTRVRFIDL-  
VTKRSEIILAAARETDGIIAREMGKDLAALHPEAAALGKIAALQHFIQVQDAHISNYVTAEIHAVLGMILL  
VLFIQEV RVGKVVPTRREVTMVFIMAALAIFFLVIGLGVQIVFMLS GISWNQLTTIVLGEGIMVVRQT  
STFPEDS-  
IGILQNTYADLICSGRVAKADIEASLHIVVAGRVARGTWYVIYLYEISQAQDQSGIMQRAFRQMTLSQ  
SLIDGRMEVKIKVVTSDRYA-  
TYEIKGGQHRKGTRYNRVKVGHNIPVQVLPRMKMAFGPPNLVLVKTFGAVVQKRFAQAL THIRHGA  
VTIGPMEVSSPYISNKKARHAPGDSVVDLKP DNIVRSVAVPELIWARENEDNGAVHDKYVKTTHKL  
AAKRKA AVDKAQYDHRNQVELSFIGLAVKVLPEKAIVHATSGQLMPTASVAVT DKMKGIAATIRLDP  
MEKALIAYIKRMRPQLNLGGQTDKKIVKCLNNNLDDVEYGKLGRRKIPITIKSVYDVEHRRATELVKL  
MPYKDDVESRKSQFAEK--  
ALFEPLKAFMMLFGYIARAVYALYLRVIRRTILLVKTIVVNASTVLSAIIIGVSIRLRHKSTNVAETNHHI  
KTIEARARMTLAGAGKVKLNLSPGKIGKKGRIKGYMPYKNFNIFDGLASGRRRAKVKELAKLKEVDKTIS  
VDGVRQKQQGGRTPKAQLSNAI-  
NTRVGVDIVGENEQDESNPRANAEMGQIFAKIDARVFSHVGALIGHALEAVLAVVSIWDIGRAHNLL  
AVRLKINAGIEMHSAA-  
VDTAVAAAAFAQSAGEASVIADISESYLGALAISAMSVDVCRLRRRGLSELKKT KDAYMSLT CFGGK  
GDKVKIVEATQTQAYEIVATRTAERHGIRAKGTYGKERAMMQILPTKPKVIWVPVFVTEVELLAPIRAF  
AESVGDGVT VVKLTKDIKVTMFEKAVASIAVTGKSTSVVYTVLEKVTELMKDIIYTQRAKAHYGRGRLR  
SHVVT TTKQSRHLSMIKRTVVADPSMDASRLTDGEVTVITGATMAFVMSEQEAV--  
GDVDLHFHEEPRREA EVGIGGPETFLTTEQPRVLALLFLRAYLIHIVEIGTVNGFSDAATIYDVL RAMQN  
KLDRKLSADIAKTRMVLTDNVTDMGVTEVAPRREAAGDKILSAFWINGVTANADIILLVANLEVQCAP  
ENIDCAIRLFYQRITLQAKERGGDVSVAIVPAANQIEAAENTVIYTIKGTKPTGTQM KLTIEGISRSIVKSL  
AVQLFQVDTFLDDTWIATWLRAALQVVFVGAEDGKEAVDHHVVERDTELEFAPQKDIVSRKIRIYTPAA  
PSAVVIWDPAIEREDKAEAQGTILKIYGP NLQDINCFTDIGAEPKIESLKAWDEKEYVVRDDIPEDI-  
TLVGKSSKVNKEFAIPDVAVCAPSKPGVTESIDRGE PKAGTCGEVANMAYPQESLVNAVSSANVQKN  
ISMVLSGHPVGEMGISREIERHLETSMCEIFVDKDDVDVALDFYILQLTPLRVGLDPPNARVQIDGKES  
RKLMAIQDGDAALQRHPKVSQATGTGLKAGVKARMPDDALMVDGVMHGDISFTATDLPDGRV-  
VTPVFNNVKAQLKIDKVLLKAFHVVTLSFSNDKGEEHLIKLRLNALKKSTRHYEMLLKIRETECAESPHAI

SVGKVLKIDALMQTICQAHYKEIPELLADELTALGVMGEQGLLHIVPRLMILAVLQFLRLEIALQIDNW  
GLQAEALVTDQTMGLYLDRDRAWSF-AISEVVGNTFFARTKETDTEQKIRARNPV-VLL-LGKFEMI-  
ISPSGLGLASTAESQERGNADELILSTERLQDEMGYYVLQILLVFVDEVILAYGSGEGPIKFLVAEQAVT  
GRQNPGMVTLTRRTFPLELQRNATFVMVFEDSTMKNLSHKKMHMNLVVIKSKGWIVNVSTKILISDQ  
AIASYAEDAGAHTQPSSESALAVITSRVMAPIVLVVSQKPTAPSKTLFLEALSLYDEVTSTVQNPKPKYYIF  
EGDVVAVLGTLDAAVLLGMQRPQPDRMRRAIVADAVRLAIALRASGIVTHLEGLINFRAVNFAALF  
Y-SNGA-----EFRVRNHVDVSTKRSRPYKAHPKFLHKADVVDKGLIATGVDTLA  
>GCA\_900172245  
AVIKPVSLNTYAPVLMIRQTQVATVSGAGSPSLRAKTVYRKSGLSRKTSTKWVAKPLY-  
GVLKLGDIVQLVSISVDNRSVCTVAQLVEQEVVHGLVALDAVKRKIALEAIDGMTTEDPARVAEFEA  
ELDLQKFRDAQEHADLLPVMLGLTLKIKFDPHEPVVHDLPIPVIFEVI-  
GIMAERGGIEVDECAISNAVSDVDPITYVSPIDLDAVTGEQMAFIDQEA AVNAARTAEIELEALEAGIL  
VVGIDPLIPV-FADDAAV-MSFANRSRELGSIVDLAVAYPEITRARI-AGIASAL-  
MVRAQAEALAEKRGTAEEIRIVKRMSRSSGLADNPDLMVLEDAAEGNSAWAGQIYDDPISGSSES  
AGNIVHAANKRQNFARSITYLRQVEISDKAKAPLMRGVKHNSKRSARNVDDAIAVLNFPNVP  
AIRAEQDKPAATLLHDATEAEAILLIVRWKVTWKTAVFLLLVF-  
AGDIVGLVQLGGLAAVGRPDGILNRHHKLNGSLIEQKRVVEKLTLRIRAALKEKLGADQVILVVKVSG  
DLVADAKVQMG-  
GTLGSVVAIQGDVIFVRRHKQTIVTDQESTVEILRGVAEGPADAAALLRIRVDHTLVKLTVLLIPE-  
PVLVESVTIREGVGKALQIIQLDVYLLRDMGTGDETLAESQSRELIPELLMVD PITGVRLAYGQVKERLN  
KQLTIKDLD-----RSIL-  
DITEPRMENLPEGVCRTFIQAGPEAAVGQFLLLAEAGKLYELDGDREL PKTVKALIGLVDAKAPKVL  
ASYATARLKLRYADCTVLEAEADLYAYAEERRELLRMVPVYIINAAKRRQLVIFMLSLRGGHRRALAAIG  
VMLAAAI LESHADHGKVVHHAPEILLDSAEIVGTAMMISRQASLDLKARSKTDVIVVFPEFQEKMVVS  
LRFCTDVAIFVIALIVTVGEMLSREKSHAQEAGAGYQKRIRGHSM LFALAVVFD RRNL RDA-  
TGDLFLALGLAAPRYGILYTNQPKKKQMPSEPDSRDV DGFELVHAIKEDERKNHELEMPEAMALAVE-  
SETINLSAGVLALSGEMAAVERVDSKRKMSKAVEKWNISRLQVRDVALSGAQPV RATG-  
IEQAALSAALGAKNV-  
FLYLLGASNEEEESRLDGAGSSTANVAEDRQRQILLVHPVLVVIQDSGAASLVSNNGGVDEWGT MAY  
KKHYAYAARMRLHMRTIDAIEVGVEMAPNKQKSEKVKTVKLEGDTRFRQLAVEGIKEQMP-  
IHALNPDFAVLVQLLVTPAVGRVAADAGVLGAEVPCDFSL-  
RELQKSMKGAALPISAIRLLAMRAARAMIEEDIMVAGKIAA-  
LLKISALETILAVILRNDSEAWGPWRLSVAERLEADTKRASGFAARPFKSKPSLCETQAHAKVADVIQEI  
AAGYVAAEQKFVFPVEGIAIQILSSPHSRVGEAKRAAEGHLHDMAKELVAKAVLMLQNEPDTNTEG  
LLNYITTNQPTDLLFPDCLDVIIELRRMSV-----  
IHLNTV-HVVVRGV RDVGDFQIMDANA-  
SGLVQVERIDERTGMEKTIMWMYGAMEELWLLSITYADWVTDCAIGAIVLHVYSQSINRAFLSKRLQL  
NGWPKEAARWWNTWQLWLNKDGFFGYEAAFRAAAQVLKAALYDYDMSDVEGVGGRYQSRQQLR  
VGYRIREQVEFARLDPRTDILLQARTRLSVIRHALTVVAILVLREVVG EFT-  
VVAEEDVAMGHVECVLADCFDFTRKNAHIGPVGLRTPETVLGDGVTFKEALLGKVDWANTVADFRY  
LVIVDGGRRLGVTWVALRNILYPRIWLPPEAAALKNLLPICFFLSHPELDL-----  
ISKARADKLMAGALVEEILEGVARFADPEATTHQTNKERHFKYYGEEVDPVYLAYILEIFALVATQVTVS  
DRLLKDRYVLNLKV-RGVTALLLLALQLAEKGPAATVITVG TIAGLGALVLF ILL-  
RDEVLVETLYHRYVYV-MRGYSAAKDVADADPEHFLRLAAVSRDVEWIEIIPAFFYYFKTAG-

FQPFNTAVAREFFGLFAERLRVVDVLAVPPDRVVALVEFVALAGTLPTSQAQALPGIIATD-  
CEPNAAAVLEAEQDWNLHRSMGITLAFFEARES VKGWFDKGLHKEVAETGLSEAGGFTTHNDCEVE  
AKKCLPAIHRVLDLGEIEAALIEIDSAVVVADEEQTLADTPTRDKAVNAIGGVLAGTMNMGANLDS  
VERGGNIIIEEEDQYHAVNGKSDGKLTDKVLMVLSRAYFVVLRALASANALDRGVIDLLIDAPQEAD  
NLDHGG-MVIPAPSVLGETTPLYAESEIDRIAYIAPIHLLGTAAVL-  
FEPDQFSFISMMIEASLEIMETAEV--  
DYHVLEKGGRRPPAFRVILIKGLHIRLMAAIGTIIVVGSAGRAEVTAYIQGRAVPITLNKNTFLPAFAASSC  
KAVDIFSTMLRPPPERSTVQMLILETV AEL-  
LEVTRLENEKLERIEMLLPGLDMAELLDLAAAATDFANIVTIGAAITAILSVA AEAVVLR ELLLT KAEIAITA  
LALAIALLMLTGDRGLTQKESARDGQMKELIQGGAVLQIRADDRMVLAATADKVRLDTDEGTTS AF  
ASLNLATVSDGFYVLSSAVLQMSADLMMIVTVARVLADKEAKNALVVRHPEQVKTQPTYAEGSPGM  
VLQTLTGCIPLAIKPEEV ELLWTLVTALWRVKAHLAQARRPLRERV LILL LALIVVLMQSEGGGMG  
GG-  
VGSAAKVLA AFSILT IKA AVGDEV RKVTRRVMDLNSRLGRPEETVSPEFRGEELEQSKFEAENVEVDTM  
ETVRRFVDIPFLVSVRTQHNESED RGARLVLDVTRVR FIDL-  
VTKSDVILVERVETDGIAREMAKDLQALQTEAAALGKIAALDHFIALNDGHISNYVTEKIHSVLGMLL  
LVLIQQVRIAKVWPTRREVTMVFIMATLAIFFIVIGLAVNLVFMVGGISPLQITTLVLGEGVMAVRQT  
STFPAES-  
VTILQNTYADLICAGRVTKADIEASLHIVVGARVARGTWYVIHHYEISQAQGEAGIMQRAFRQATLSQ  
SLIDGRMEVKVKVVTSDRYA-  
TYEIKGGQHRKGTRFHRVKMGHNIPVEILARIKLAFGDPNLILVKTFGAVVQKRFAQPLTHIRHGAVTIG  
PMEVASPYITMKKARHAPGDSVVDVKPDNIVRSVAVVPELIWARENEDNSAVHDKYVKTTHTKTA AK  
RNRAVDKAQYDKRSQVHLSFIGLAVKVLPEQAI VHATAGTLLPTESVAVTENLK GVAATIRLDPM EKA  
LIAYIKRMRPQLNLGGKTDKKIVKCLNNGLD DVEY GKLGRRKIPITIKSVYDVEHREATELVKVM PYKD  
DVESRKSQFAEK--  
AIFEPLKAFMMLFGFIARAVYALYLRVVRRTILLAKTKIVVNANTVLSAIIIGVSIRLRHKSTNIADTKHHI  
KTIEARARMTLAGTPSVKLNLRREGKVG MKAGRIKGYMPYKNFNIFEGLASGRRAKVKDLAKLKKVDKTI  
SVDGIRTRQ-  
GGRIPKAQLSNALANTRVGVDIVGENTQEESNPRANAEMGQVFAAIDARVYSLVAALRGHALVAVL  
AVCAIQGIGRAHSL LAVY-KINAGIEFHSA A-VETAVAAA-  
YAQPGGEAAALWDVSEADLGDISL TEASLDVVRPRRSLGELKKTKEAYMSLT CFGGKGDKVKIVEA  
TQTQAYEIVATRTAERFGIAAKGTYGKERAMMQITPTKPVKVWVPV FVSEDELLAPIRAFAETNGDGV  
TVVKLT KDIKVTMFEKAVASLAVAGKSTSVVYTVLEKVT ELSKDIYDQRAKAHYGRGLRSHVVTHTK  
QKRHL SMIKRTVVASPKMDAARLHDGEVTITGATMAFVMSEQDAV--  
GDVDMHFHEEP RREAALGIAGPETFLATEQPRVLALLLLREYLIHIVDIETVGGFADAATIFDILRAMQN  
KLDRKLSAEIAKVRMCLHDDVADMGVKA EAPRREAAGDPILSAYWINGVTASSDIILLVANLECHTAP  
ENIDCAVRLFYQRITLQAKERGGDVSVALVPAQNQIEAAEGTVIYTIKGKTPSTVQMKNIEAISNSIVK  
SLAVQLFQVELFLNDTWI AVL LRAAEVVFVDSGEGREAVDHWVERDTELEMAPQKDIVRRKIRIYTPA  
APSAVVIWDPAIERADKADAQGTILKIYGPDLQDIACFTDIGAEPKIESLKAWDEKERYVVRDDIPDI  
TTLVGKSSRVNKEFGIPDVAVCAPSKPGV-  
ESIDRGEPKAGSCGEVANLPYPQDSL VNRVSSANVQKNISMVLGGHPVGEMGISRGVERHLETNMC  
QIFVDKDDVDVALDFYKLALTPLRVGLDSPNAKVQIDGKESRKLMAVLDGEAKLQRHPKVSTAAGG-  
RKAGMKARLPDDALIFDGVHHGDIKFTATDLPEGRV-  
VTPVFNNVKAQLEIDKVLKTFHVVTLSFSNDKGEEHLIKRLNALKKSTRHYEMLLKIRDTECATSPHAI



PVGKILKIDSLLQTICQAHYKAIEPLLAEDLTALGVLGDQGLLHIVPRLMILAVLTLWGLEAALEHRRW-  
LQATRLVTDQTMGLAVRERHWSF-AISEVVGNTFFARTKDDDTAEQLHARNPI-VIL-YGKEGMV-  
ISPSGLKLASTKPSPTGHGNENRLVLSTERLQDSMSYFVLKVLLVFVDEMLVAVWGSGEPLKFLVAEQ  
ITGRANPQLVCLTRRTFPLDLQRHAVFVMVFEDSTMKNLSHKKMHMNLVLIKSGWVNVSTKILIS  
DQAIASYAEDAGAHTQPSESALAIITSRVIPIVLVISQKPAAPSKTMFLEALNLLDEITVTVQNKPKRYI  
FEGDVVAVLGGDLAAVLLGMQRPQPARMRRAVVAAAIRLAIALRGSGVVAQLEGGVLNFARAVSLA  
A-VYPDLDLDF-TGAAIE-RAIAFRVRNHKTSTKRDRPYKGHPKVLHKAEEKSLVADGVDTLA  
>GCA\_900172275  
AVIKPVTQDAYAPVLMIRQDQVATVSGAGSPSLRAKTVYAKSGLQRKVATKWVAAPFY-  
GVVKMGNIQVLSISVDNRAVCTVAQLVEQEVVHGMVALDAVKKKIALDEIDGMTSEDPAKVQY  
AVDIVLKAYRDADDRADLLPVLLGLTLKIAFDPEPVVHDLPIPIYEVV-  
GIMAQKGTIEVDDCAISTAVSDVDPIAYVSPIDLAAGVAGTEMAFIDQEAANARETVEL--  
LALEASILVVGKPLLPI-FEKDG-T-MSFANRSRELKSIVDLAVAYATITRARIELEFVAEM-  
MDRAKAAALSEKRGTAEEIRIVKRMQKSSGLADDPDLVMELEDAEAGNSSWAGQIYDDPISGSSES  
VGNIVHAANKRQNFERSITYLRKAEISDKAAAPLMRGVKHNAKSRVARKLDDTIAALNFPNVPEGIAIA  
AAGKIPHIHLLHDAEEGEEILLIVRWHVTWKTAIFVLLPLAGNIVGLIELGGIAAVGKMDGVLNRHHK  
LNGSLIEQRPIIEKMTLRLRASLKQKLGAEQIIIFVVRVAGDLIAEAKVQM---  
NVGAVVAIQGETIFVRRHKQTVITDQEATV-VLQGVAEGPADAAALLRIRVDHTLVKLTVLLIPE-  
PVLVESVTIREGVGKALQIIQLDVYLLRDMGTGDQTLAKSKSRELLREVLQVDPITGVRLAFGKIKERLTK  
GMKLDLD-----  
LSLLAGVTEPRMENLPEGVRRDFVEAGPRAAVGMVFLLLDEAGRVYSIDGDLRELTKSIKSLIGLVDA  
TPKILSAGYAATRLKIRYADCSVLVSDADLYAYAEERRELLRMVPVYIVKAAKRRQLVIFALSLRGHRR  
ARASLQVLLPATILESQAEEGTVDHEEPEVLLDDAEIVGSEMMISRQSALDLKQILKVDVVVLFPEFQEK  
MVVSLRFFCTEVAIFVIALITTVGEMLSREPEHAQEEGAGYQKRIRKHSVLFALVCTFDRRNARAA--  
PDLFLALGLAEVRYGILYTNQPKKKQMPSEP DGDRIDGFELVHAIHNDGSSNHELEFGAMALAVE-  
DATINVTAGVLALNGGMVAVEKVD SKRKVAVAAEKWNIAPLNVEDITISGADEIRCLN-  
IESADLSAALQKKDI-  
FLFLPGANNKELEEGKLDGAGNSSADAAEDRQTALIVTPVLVTIQDSNTASLIANGGVEEWGTMAYK  
KHYAYAARMRLHMRTID-----  
MEPNKQKSEKVKTVKLEGDTRFRQLATEGVKEQMPVLHALNPDFAVLAPVLVTPAVGQVAADENVL  
GARVPCDFSL-RELQSRKGTALPISAMRLLGVRKARAMIEEGIMVAGKVAA-  
LLKIAALETITKLVLNRNDTEATLPWRLSVAERLEADTKRAGGFASRPFMSKPSLCNTQAHANVADPIETI  
AAGYVATKERFVFPVEGIAIQILASPHSRVGGAKRAGEGHLHEMAKELMAKAVLM--  
GEPESDTEGLLNYHTTNQPTDLLTDCLDILIDLRMTIV-----  
-----VQLTTV-HVVVAGVRDVGSYEIMAAAA-  
SGLVQVERIDDLTGRERTLMWMYGAMEELWLLSLRYADWVIDVPIGAILHVYAQAINRAFSLARLQI  
DGWPPEADRWWNTWQLWLNKDGFFSYEAAFRVAVKVLKQELADFDMSD TDGVGRLSRQEIRAG  
YRIRQQVTFKRDPRTDILLQSKTRFAIRHALDMVAILVIREIAPEFT-  
VVAMQDVAMGHVECVLADCFDFTAKNADIGPVGLKTPDNIFGDGTVLKEAVLGKIDLKNTVADFRY  
RFIDGGRELGVDWIGLQNMLYARIWVPPAQAAALKNLTPICMFLSHPELDLLE-  
SLFDGISKARADQLMAGVLIEILDGIARFAHPEATTHQSNKEKHFKYYGEEVDPVHLAYILEIFALVAT  
QVTVSDRLLKDRYVLNLQIFRSLTSLWMALQLAEKGPAATVITLGTIAGLGALVFIILLMRDSVLVETL  
YFRYVY--MRGYSAAKDVTADPEHLL-LAHASRDVEWIEIIPAFFYFVTATSRR-  
ENTAVAKEFFGLFKERLRIVDLVVPPEVDDLVDFVALAGTLVTRADALPLGIATGLCEPNAAVLEA

DQDWNLHRSMGITLAFYKAQESVKGWFDKGLHKDVATISLSEAEGFTTPFHAGAQANNCAPAIHRV  
IDLGEVEASLIEIDSAVVVADEEQLADKPTRDNSVNAVGGVVLAGTMNMGANLDSVERGGNIIEL  
EEETYNVANGKKADGKLTNKVLMVISAFFVVMKRLASANALDKGAVDLLIDAPDDADNLDHGRTM  
TIPAPT VHGETTPLYAESEIERIAWVAPIHMLGTLPVLEFEPDQYSFISMKIEASLEIMSTAENVLDDYHVL  
DKGSRPSAFRVVLIRGLHIRQLAGIGTIIVVGSAGRTEVTAYIEG-  
AVPITLNKNTFLPFAAASSCHAIMSTMLRPPPERSTIVTMILETVael-  
LEVTRFSNDKLERLKLPLGLDMAEMTLVAAAKDFAEIVTIDAAITAILSVAAEAVVLREMLLTAEIAV  
SALALALALLMLTPDRGLTQKEAAREEQMKELIQGGVVLQVRAADMVLAADKVLSTDEGTTT  
AFASLNLATVSDGFYVLSAVLQMSSDLMMVVAVARVLADKETKNALVVRHPEQVKTQPTYAEGSP  
GMVLQTLTGHIPLAIKPEDVELLWTLVAALWRVKAHLAQATRPHERVLVLLALALIVLLQSEGG  
GIGGGAMGAAAKLLAAFSVLTAKASVGDEVKVARVMDLNSRLGRPEEAVNPEFRGAELEQTKYEA  
ENVEVDCLETVRRFVDIPFLVSIRTQHNESEDGARLVLDVTRVRFIDL-  
VTKKSEILVERAETDGVISREMSKDLQALHPEAAALGKVAALQHYVAISDGHISNYVTADIHSVLGMLI  
LVLFIQQVRVGKVVWPTTRREVTMVLIMAAVALFFLVIGL--  
QLVFMGGISWQQLTTLVLGEGVMAVRQTSTFPKDS-  
IGILQNTYADLICAGRVTKADIEASLHIVVGARVARGTWYVIYHYEITQAQQEAGIMQRAFRQKTLSSQ  
LIDGRMEVKIKVVTSDRYA-  
TYEIKGGQHRKGTNRVVKVGHNIPVDVLPRIKMAFGPPNLLVKTGFAVVQKRFAQQLTHMRHGAV  
TIGPMEVASPYIKSKKARHAPGDSVVDLKPDLNLSVAVVPELIWAREKEDNGAVHDKYTKTTHKTAA  
KRNRAVDKAQYDHRNQVELSFIGLAVKVLPEKAIVEATAGTLMPTESVTVTEGLKGVAATIRLDPMEK  
ALAIYIKRMRPQLNLQGVKDKIVKCLNNNLDDVEFGKLGRRKIKPLTIKSVYDVEHEQATELVKIIPYK  
DDVEGRKSQFAEK--  
ALFEPLKAFMMLFGFIARAIYALSLRVVRRTIILVKTIVVNAATVLSAIIIGVSIRLRHKSTNVADTNHTI  
KTIEDRARMTLAGTGKVKLNLHPGKVGMMKGGRIGYMPYKNYNIFDKLASGRRRAVKELAKKKVDKE  
ISVDGIRVKQQGGRTQPADLSNAIANTRVGVDIVGESTQEESENPRANAEMGQIFAADARIYHHVAA  
LIGHALVAILAIVDILGIGKAHALLTDALKINAGIELHSAA-VDTAVAAA-YAQTGGEA-  
AIADVSEAYLGLIRITAESLDVCRLKRRSISELKTKKDAYMALTCFGGKGDVKVIVEATQTQFYEIVATR  
TAERHGIAKAGTYGKERAMMQITPTKPVKVVVPIFVNEDELLAP-  
RAFAETVGDGVTVVKLTKDIKVTMFEKAVASLSVAGKSTTIVYTVLEKVTLSKDIIEQRSKTHYGRGRL  
RSHVVTHTKSRRHLSMMKRTVVAAPSLDAARLTDGEVTVITGATMAFVMSEQDAV--  
GDVDLHYHEEPRREAPLGIAGPETFLATEQPRVLALIFLRAVLIHLVDVGTKGGFADAATIYDILRAMQ  
NKLDRLKSADIAKTRMCLHDNLADMVTELAPRRDSAGDAILSAYWINGVTANVDIILLVANLECGC  
APENIDCAVRLFYQRVTLQAKERGGDVSVAVVPAQNQIEAAEGTVIYSIKGNTPSSTQMKLTVEGISR  
SIVKSLAVQLFQVNLFLNDTWLGTLVRAAGDVAYVDAKGGDEAVDHVVERDTELEQDPQKDIVTRKI  
RIFTAAPSASVVIWDPAIEREDKADAQGTIIKIYGNLQDINCFTDIGAEPKIESLKSWEKEKYVVRD  
DIPEDI-  
TMVGKSSKVNKEFAIPDVAVVAPAKPGVTESIDRGEPKAGSCGEVANMAYPQESLVNAVSSANVQK  
NISMVLGGHPVGEMGISRGIERHLETSMCEIFVDKNDIDVALDFSTLKLTLPLRVGLDPPNAKVQIDGKE  
TRKLMAVLDGDADLQRHPKVSEATGIVKTAGTKARLPDDTLMVDGVQNGDIKFTITDLPGGRV-  
VTPVFNAVKAQLKIDKVMLKSFHVVTLSFSNEKGEEHLIKRLNALKKSTRHYEMLLKIRETECADSPHA  
IavgKILKIDALLQTICQAHYTAIEPLADDLTALGVMGQQGLLHVPRMLAVVHVWGVDAAFIYK  
W-IPAEAIMTDVTMGLDQRDRDWTY-CISEVVNNTFFARTAADDTERLHARNPI-ILL-YDKFGMT-  
ISPSGHLASTAEADLKHGNTNQLVLSAERLQDDMSYVVLQVLLVFVDEVILAFGSGDEPIRFLVAEQA  
ITGRENPGMVCLTRRTFPLDLQRDATFVLVFEEDSTMKNLSHKKMHMNLVLIKSKGWIVNVSTKILISD

QAIASYAEDAGAHTQPSESALAVITSRVMAPIVLVVSQKPTAPSKTLFLEALNLYDEVTATVLNPKPKY  
YIFEGDVISVLGTIDAAVILGMQRPQPDAMRRAIVAAAIRLAIALRASLMVHVLGHDQINFSRAMSFT  
Q-AYTDMAA-----AFRVRNHKVSTKRARPYKGHTKFLHKADMMDKNLVAEGVDTLA  
>GCA\_900172355  
AVIKPVTINVYAPVLMIKQQQVATVSGAGSPTLRPKTVYAKSGLQRKTMTKWVASSYYY-  
GVVKMSKIVQLVSISVDNRTVCTVAQLVEQEVVHVGIVALEAVKKRIALKEIEGMTSEDPKVVQYEPE  
LELKRFRDAEDRADMLPVLLGLTLKIRFDPHQPLVHDLPIPVIFEV-  
GIMVQRGQIEVDECAVSTAVSDVDPIAYVSPIDLEV VAGEGIAYIDQETAIAAAKDAIALEELALESTVL  
VVGI-PLILPI-FRDAGR-MSFANRSRSLESIVNLAVAAERLFRARIE-PMISAL-  
MREARASALATKRGTAEERIVKRMQKSAGLADDPDLVILEDAAEGNSSWAGQIYDDPLSGSSESDSA  
GNIVHAANKRQNNARSITELRKVEISNQAAAPLMRGVKHNAKSRSSRLDDAIAALNFPNVPEGIAIA  
ATMGKTPATLLHDALEGEIEILLIIVRWHVTWKTAVFIVLALRAGDVVGLIELGGIAAVGAPDGILNRHH  
KLNGLSIEQKRIVDKLTLPLRAALKQKLGAEKVILVVKVAGDLVADATVQM---  
GVGAVVAIQGVTIYVRRHRQTIVTDS DATVEVLRGVAEGPADAQALLRIRVDHTLVKLSVLLIPE-  
PVLVESVTIREGVGKALQIIQLDVYLLRDMGTGEDTLAKSRRELIRDILMVD PITGVRLAFGHIRERLSK  
GLTIKELKTLL--  
QAIMRDVTEPRMATLPDGINRSLEAGPRAAVGTFLVLDDAGRLY AISGDLRELTKSIKSLIGLVDAAV  
PKVLSATYATDRLRIRYADVTLTSDAGLYAYAEERREILRMVPVYITTAARRQLIFALS LKGGHRAQ  
AALGVLIAAALRESQAEKGPVHHADPAILLDDAEVMGSEMMISRQASLDLKAVVKVDVIVVFEFQEK  
MVVSLRFFCTEVAIFVIALIVTVGAMLSREPAHAQEGGAGFQKRIRGHSILFALAATFERANARDA--  
ADLFLGLGLCPPRYGLFYTLQPKRKQMPTEPDEEKVDGFELIAVVKEDGRSNHELEMPEAMALAVE-  
DAPINVTAGVLALSGDMVDLERVDSKRKMALAVTKWTIAPVAILDLHLSGARPMRALD-  
IELAPVSAALSSKEIATLFLPGANNAELEEDTLDGAGASSADAAEDRQTAILLVNPNVLVVIQDSNAAGL  
VTNDGVDEWGT MAYKKHYAFAARMRLHMRTID-----  
QMEPNKQKSEKVKT VKLEGDTRFRQLAVEGVKEQMP-  
LHALNPDAFVMVPVLVTPAVGRVAATSAIVGAGVPCGDSL-  
RELQKSQKGDALPISAVRLLGMGAARAMVEEDIMVAGKVAA-  
LLRIGALEVVAGFVLNDSEATLPWRLSVAERLES DTKRASGFAARPF RSKPSLCNVQAHAAVA EPIREI  
AAGYIAAGGRFVFPVEGIPIQLILASIHSRVGEAKRAGEGHLHEMAKELVAKAVLMVKSEPGSNTEGLL  
DYITTGQPTDLLFKDCLDIIDLRRMNII-----  
IQLNTV-  
HIVIPGTRELADREIMAA NADSGLVQVERVDERTGRERTKMWMYGAMEELWLMSVKYAEWVIDTPI  
GAILHVYAQTINRAFS LTRLQLEGWPPEADRW WNTWQLWLNKDGFFGYDAAFRAVRAILRADLYD  
YEMSDVEGVGRYQSRQELRVGYRIRQEVEFARLDPRTDILLQSQTRLSVIRHALKLVAILIRQLVAEFT-  
VVAEEDVAMGHVECVLADQFSFTDKNAHIGPVGLRTPAPVLGDGTVFNAAVLGKIDLENTIADFRYR  
MITDGRRRLGVHW----NMLYARIWLPAAAAALKNLAPIAFFLGHPALDLRVF-  
PLFQGISKARADRLMAGALIEEILESVARFADPEATTHQTHKERHFKYYGEEVDPVHLTYIFQKVKL VAT  
QVTISDRLLRDRYVLNLKVFRGFTSLLLLAIQLGTKGPSATVITVDTIMGLGALVLFILL-  
RDVVLLETIFYRYVYH-MRGYEA AKDVADADPEHLLSLAQVSRDLEWIEIVPAFFYYFKTAG-  
FEPFNTAVAKEFFGLFEERLRIVDVLVPPSRVEALHELVAFAGTVETA AEAELEGVIACGLCEPNAAAVL  
EADQDWNLHRHLGITLAFLEARVSVKGWFDKGLHKAVAQTGLSEAGGFTTFPMAGEAAQKCPVV  
HRVLDLLGMEAALIEIDSAVVVADEEQTLADKPTTREKAVGAIGGVVLAGTMNMGANLEQVERSGNI  
IIELEEEHYNVNGKKADGKLTNKVLMVLSAALFPVVARAASATAMDRGAYDLLIEAPDDVANLDHG  
RDLSIPAPTVHLETTPLYAESEIERIAWIAPLHMLGTLEAVLGFEPDQYSFISMMIDASLDITETAEV--

DYHVLEKGGRPDPFRVILIKGLHIRVLAGISTIIVVGSAGRAEVTAYIHG-  
AVPITLNKHTFLPAFAASSCHVIDIFSTMLRPPERSTVQMLILETVAEL-LEVTRGENDKLERL-  
LLLPGLDMAALLALAAAAVDFAAIVTIDAAIVAILSVAEEAVVRELLTLAEIAVTALALAMALLMLTR  
DQGLHQREAREAQMKTLIQGGAVLQVRAADRMVLAATADKVRLDTDEGTTSAFASLNLATVSDG  
FYVLSSAVLQLSSDLMMIVHVARVLADKEHKNALVVRHPEQVKTQATYAEGSPGMVLQTLTGIPPL  
AVKPEAIELLWTLVAALWRVKAHFASAMRPRLERVLVLLALTIVVLMQSEGGGMGG--  
MGSAAKGLAAFSILTİKASVGDEVKVTTRVMDLNGRLGRPEEAVNPEFRGAELEQSKFEAENVAVDT  
METIRRFVDIPFLVSTRTOHNESEDGRSRMVLVDVTRVRFIDL-  
VTKRSEIILAAEAETDGIISREMQKDLQALHPEAAALGKIAALQHFIALNDGHISNYVTADIHSVLGMLL  
LVLFVSQVRVAKVWVPTREVTMVFLAAVAVFFLVIGLVQIVFMLSIGISYNALTTLVLGEGVMAVR  
QTSTFPADS-  
IGILQNTYADLICAGRVTKADIENSLHIVVGARVARGTWYVIYPYEITQAQAPAGIMQRAFRQATLSQS  
LIDGRMEVKIKVVTSDRYA-  
TYEIKGGQHRKGRFQQVKIGHNIPVELLPRIKMAFGPPNLILVKTFGAVVQKRFAQALTHMRHGAVT  
IGPMEVASPYITAKKSRHAPGDSVVDLKPDNIVRSVAVPELIWAREHEDNGAVHDKYVKTTHKTAA  
KRNKAVDKAQYDHRNQVELSFIGLAVKVLPEKA-----  
--  
RMKPQLNLGGKTDKIVKCLNNNLDDVEYGKLGRRKIPITIKSVYDVEHRKGTENVKLLPYKDDVESR  
KSQFAEK--  
ALFEPLQAFMMIFGFIARAVYALHLRVVRRRTILLVKTRIVVNANTVLSAIIIGVSIRLRHKSTNVADTNH  
YIKTIEKRARMTLAGAGKVLNLRPGRVGGKGGRIKGYMPYNNFNIFDGLSGRRRAKVQDLAKIKKVD  
KEVSVDGIRTKQQGGGRQPKADLSNAL-  
NTRVDVDIVGENEQUEESNPRANAEMGQIFAAIDARVYHLVGALIGHALEA-  
LAVADIWIGIGKAHALLGDKLKINAGIEFHSA-VERAVAAA-YAQPAGEA-  
ALADVSEAYLGALLLTEQALDVCRLRRRQLSE-----  
RHGIKAKGTYGKERAMMQITSTKPVKVWVPIFVNDELAPIRAVAETNGDGEVVKLDNDIKITMFE  
KAVASLAVTGKSSSLIYTVLEKVTLMKDIIYEQRAKAHYGRGLRSHVVTHTKQKRHLSMMRRTVVA  
DPKMDAARLTDGEVSVITGATIAFVMSEQDAV--  
GDVDFHFHEEPRREADLGIAGPETFLATEQPRVLVLLFLRAYLIHIVEIDTVGGYSDAATIIDILRAMQN  
KLDRKLSADIAKVRMVLHDTVSHMGVVRTEAARRDSAGDTILSAYWLNQVTAKSIDIILLVANLECRTVP  
ENIDCAVRLFYQVRTLQAKERGGDVSAVVKAQNQIEAAEGTVIYTIKGTPTGVQMALNVEGISRSI  
VKSLAVQLFQVDTFIDDTWIATLLRAAGQVVFVDARDGKEAVDHVVERDTELEFAPQKDILPRKIRIYT  
PAAPSAVLIWDPAIEREDKADAQGTILKIYGPNLQDISCFTDIGSEPKIESLTSWDEKEYVVRDDIPA  
DITTLVGKSSRVNKEFGIPDVAVVAPSKPGVTESIDAGEPKAGTCGEVANMAYPQESIVNAVSSANVQ  
KNISMVLGGHPVGEMGIAREVERHLETNMCQIFVDKPDVDVALDFYRLALTPLRVGLDRPNAKVEID  
GKESRKLMAVRDGDASLQRHPKVSAAAGTGAKAATKAKLPDDALIHGCVHHGDVSFTATDLPEGRV  
-  
VTPVFNTVKAQLKIDKVLLRTHFHVVTLSFSNDKGDEHLIKLRLNALKKSTRHYEMMLKIRETECAESPNA  
IPVGKILKIDSLLQTICQAHYTAIEPLLADDLTALGVMGDQGLLHVPRMLAVMHLWGLEAAMELST  
WHLMAQCQVVDVTMGLAIRERQYTF-AISEVVGNTFFAMTKDDDTEQRLHARNPI-VLL-  
WGKFAMVVISPSGMRLDSTAESAHEGNQEKLVLSPERLQDAMGYIILRLLLVFVDEMILAYGSGKEP  
IKFLVAEQAVTGRENPGVLCLTRRTFPLDLQRDATFVMVFEDSTMKNLSHKKMHMNLVLIKSGWIV  
NVSTKILISDQAIASAEADAGAHTQPSALAAITSRVIPIVLVVSQKPTAPSKTLFLEALNLYDEVTAT  
VLNAPKKYIFEGDLISVLGPIDAAVLKGLQRPQPDRMRRAVIAAAIRLAIAGR---

LTARLEAGLLNFSRSISFMR-  
EYPQLSPLVRAAMQPGAVAFRVRNHKTSTKRDRPYKGHTKFLHKAEEKSLVAEGVDTLA  
>GCA\_900184895  
AVIKPVTMPIYAPVLMIRQQQVATVSGAGSPSLRAKTVYAKSGLQRKTTETKWVAKPLY-  
GVIKMGKIVQLVSISVDNRVVCTVAQLVEQEVVHGMVALEAVKKIALEAIDGMTAEDPAKVVDYQ  
GELELKRFRDAEDRADMLPVMLGLTLGIKFDHPQPVVHDLPPVIFEVV-  
GIMAQRGGIEVDECAISTAVSDVDPIAYISPIDLEAVAGDKMAYIDQEAASAAKDAIELEELALESSVL  
VVGI-PLLLPV-FGEDGDT-MSFANRSRTLESIVDLAVAYPEQTRARISVGIASEM-  
MGRARAAALSEKKGTAEIRIVKRMSKSAGLADDPDLVILEDAEAGNSSWAGQIYDDPISNSSESDSA  
GNIVFAANERQNFARSITELRKVEISDKAAAPLMRGVKHNAKSRNRKVNDIAALNFPNVPVGI  
AAAGRTHHALLHDATEGEEILMLVRLHVTWKTIIIALAVTAGDIVGVITLGGAAVGRKDGILNRHH  
KMNGSLIEQKRVIDKTLRLRASLKQKLGAEQVIFVVKVAGDLVAEATVQMG--  
DIGAVVAIQGETIFVRRHRQT VVTDQEATVEILRGVAEGPADAQALLRIRDHTLVDISVLLIPQVPVLV  
ESVTIREGVGKALQIIQLDVYLLRDMGTGEDTLAKSKSRELLREVLQVDEITGVRLAYGKLKERLVKGMT  
LKELDTLF--  
LVLVKDVTEPRMENLAEGVCRTLVEAGPRAAVGTLFLMLEDAGKLYTIDGDLREILKSIKSLIGLVDAK  
PKVLSAQYAAARLKIRYADCTVLTSEADLYAYKEERKELRMVPVYITNAAKRRQLVILALS  
KASLGVLIAAAIIESQTVEGATHHDEPRVLLEDAEVVGSEIMVSRQASLDLKAVIKVDIIVVFPEFQEK  
VVSLRFFCTDVAIFVIALIVVVGAMLSREPAHAQEEGAGFGKRIRGSAVLFALAASFDKRNAGDA---  
DLFLGMGLAPPRYGILYNMQPKKKQMPSEPDAERVDGFDLVNAVKADSSTNHVLELREAMALAVE-  
DSPINLAAGVLALKGTMAAVEKVDSKRKMALAVEKWTIAPLPLDLTLSGASPVRALG-  
IDLADVTAALPAKTI-  
GLFLPGANNAELEEKLGGAGASSAEAAADRQLSILLVRPVLVVIQDSSAASLVANGGVEEWGTMAY  
KKHYAYAARMRLHMRTIDGIEGVSLPENKQKAEKIKTVKLEGDTRFRQLAIEGVREQMP-  
LHALNPDAFV-LAVLVSPAVGRVAADQDVLGASVPCDASL-  
RELQKSQKGDALPISGIRLLGMGAARAMIEEDIMVAGKVGA-  
LLVIRALETIAAFVLRNDSEATLPWRLSVAERIEADTKRAGGFASRPFKSKPSLCNTQAHARVADPIQE  
AAGYVAVDERFVFPVEGLAIQLFMANTLSRIGSAKRAGEGHLHEMAKELKSKAVIMVQNEPNTNTEG  
LLTYMTTQQPTDLLFEDCLDVIIDLRRMNIV-----  
IQLNTV-  
HVVVAGVRDVGAFEIMAAAAASGLVQVEQVDDRTGREKSLMWMYGAMEDLWLM SVTWADWVI  
DCSIGAIIHVYAQTINRAFLKRLQLSGWPQEADRWVNTWQLWLNKDGFFSYEAAFRA-  
LAVLNADLYDYDMSDVEGVGRYLSRQQLRVGYRIRREEVAFERLDPRTDILLQSHTRLSVIRHALTLVNI  
LIVRTIVAEFT-  
VVAQEDVAMGHVECVLADQDFDTAKNADIGPVGLRTPAPVLGDGTVFAEAVLGKIDWANTVADFR  
YKFLTDGGRRLGVS WVKI-  
NMLVGRIWLPPAAAAALKNLLPICFFLSHPENLDLLAALWDGISKARADKLMAGALIEKLLPGVAAFA  
DPEATTHQSKKEKHFKYYGEEVDPVHLAYILAMFALVATQVTISDRLLKDRYVLNMKI-  
RGFTSLLWMSLQLGLKGPSATVITVDTIAGLGALVFIILL-RDEVLVETLYWRYVY--  
MRGYTAAKDVADADPEHLLTLAHSRDVEWIEIVPAFFYYFPTAT-  
FEPFNTAVAREFFGLFEERLKVVAVLVVPPDRVEALVEFVALAGTLATSAEALVGVIACAFCEPNAAVL  
EADQDWNLHRSMGITLAAFAAQVSVKGWFDKGLHKDVAATGLREAGALTTPFHAGATAKFCVPAV  
HRVLDLGEIEASLIEIDSAVLVADEELTLADKPTTREKSVGAVGGIVLAGTMAMGSALDSVERGNIIIEL  
EEESYSAVNGAADSSKLTDKVLMVLSAAYFPVLARMASANALDKGVFGLLIDAPDDADNLDHGG-

MTIPAPTVHAETTPLYAESDIERIAWVAPIHMLGTLPAVLGFEPDQYSFISMMIEASLEIMETAEV--  
DYHVLETGSRPPDFRVTLIRGLHIRQMASIGTIIVVGSAGRSEITAYIQG-  
AVPITLKRETFLPAFAASSCHVIDVFSTMLRPPERSTVVTMILETVael-  
LNVTRIENDKLERLLLLPLGLDVAALLDLLAAADFAITVTIDAAITAILSVAEEAVLRELLTLAEIAVTA  
LALALALLMLTPDKGLHQREAAEAQLKDLIQGGVVLQVKASDSMVLAATADKVRDLTDEGTTSF  
ASLNLATVSDGFYVLSSAVLQLSSDLMMIISVARVLADKESKNALVVRHPEQVKTQPTYAEGSPGMVL  
QTLTDCVPPLAVKPQEIELLWTLVAALWRVKAHLASAARPHRERVVLILALS LIVVLLQSEGGMG  
G-  
VGSAAKILAAFSILTIIKAGDEVKVRTRVMDLSQRLGRPEESVNPEFRGAELEQSKYEAENVEVDTM  
ETIRRFVDIPFLVSTRTQHNESEDGRSMVL DVTRVRFDL-  
VTKRSEILAAARVETDGIIAREMQKDMQSLHPEAAALGKVAALQHYISINDGHISNYVTADIHAVLGML  
LLVLFVQETRIAKVWWPTRREVMTMVFLAAVAVFFLVIGLTVQLVFM LGGISWQQLTTLVLGEGVMV  
RQTSTFPADS-  
IGILQNTFADLIAAGRVAKADIEASLHIVVGARVARGTWYVIYLYEITQAQAPGGILQRAFRQATLSKSLI  
DGRMEVKIKVVTSDRYA-  
TYEIKGGQHRKGTRYNRVKVGHNPVQVLPRMKMAFSPPNLVLVKTFGAVVQKRFAQQLTHMRHG  
AVAIGPMEISSPYISAKKARHAPGDAVVELKPENILRSVAVVPELIWARENEDNGAVHDKYVKTTHKLA  
AKRKAVDKAQYDKRNQVEMSFGLAVKVLPEKAIVHATAGMLMPTASVAVTEGMKGIAATIRLDP  
MEKQLIAYIKMRPQLNLAGKTDKKIVKCLNNNLDDVEYGKLGRRKIKPLTIKSVYDVESEEATELVKLL  
PYKDDVEGRKSQFAEK--  
ALFEPLKAFMMLFGFIARAIYALYLRVVRRTILLAKTKVVVAAATVLSAIIIGISIRLRHKSTNVAETNHHI  
KTLED RARMTLAGTGKVKLHHPGRIGKKGRIKGYMPYKNYNIFDGLASGRRRAKVKELAKLKKVDKEI  
SVNGIRMKQQGGRVPKPNLSNAIANSRVGV DIVGENEQEESNPRANAEMGQIFAAIDARIYSLVGAL  
IGHALEAVLAVVAIWGIGRAHCLMAVAFRINAGIELHSAA-VARAVAAA-  
FAQNGGEAAVIADVSECYLGALSISQVSLTVCLRRRRRLSELKTKKDAYMSLTCFAGKGDRVKIIEAA  
QTQAYEIVATRTAERHGISAQGTYGKERAMMQITSTKPVKVVVPIFVTEDELLAPIRAVAETNGDGV  
VVKLT KDIKVTMF EKAVASIAVTGNATSVLYTVLEKVTELMKDIIYEQRAKAHYGRGLRSHVVTHTKQ  
KRHL SMIRRTVADPRMDASRLTDGEVSITGATMAFVMSEQDAV--  
GDVDLHFHEEPRREA EVGIAGPETFLT TAQPRVLALLFLKAYLLHIVEIETSNGFSDAATIYDILRAMQNK  
LDRKLSADI AKTRMCLHDNIPTMGVTELAARREAAGDPILSAYWINGVTANS DIILLVANLETACTPEN  
IDCAIRLFYQRVTLQAKERGGDVTVS VVKAQNQIEAAEGTVIYSTKGTQPGTLQMKLTVEGVSR SIVKS  
FAVQLFQVDTFLNDTWIATLLRAAQDVV FVQATEGKEAVDHVVERDTELEFAPQKDIVARKIRIFTPA  
APSAVVIWDPAIEREDKADAQGTILKIYGNLQDISCFTDIGSEPKIESLKAWDEKEKYVVHRDDIPEDI  
DTLVGKSSRVNKEFGIPDVAVCAPSKPGVTESIDRGEPKAGSCGEVANMSYPQESLVNAVSSANVQK  
NISMVLQGHVPVGMGISRGIERHLETNMCEIFVDKADVDVALDFYKLELTPLRVGLDKPNARVDIDGK  
ESRKLMAVL DGAAGLQRHPKVSAA TGLTQNAGSKAKLEDEALIFDGVQHGDVSFTALDLPDGRV-  
VTPVFNAVKAQLKIDK VILRAFHVVTLSFSNNKGDEHLVKLRLNALKKSTRHYEMMLKIRETECAESPH  
AISVGKILKIDSLLQTCIVAHYTAIEPLLADLTALGVMGDQGLLHVVPRLMILAVLHLWGVEAEALVP  
QW-IQAEAVVTDITIGLRQRERDWSY-AISEVVGNTFFARTFDDDTEQRLHARNPI-VLL-  
YGKFDMT-  
ISPSGLRLDSTAPTAREHGNDEQLVLSKERLQDHMGYYILKVL VLVFVDEVIVAFGSGDEPLKFLVAHQ  
VTGRGNPGMVTLTRRTFPVDLQRDPV FVMVFEDSTMKNLSHKKMHMNLVLIKSGWVVNVSTKILI  
SDQAIAS YAEDAGAHTQPS ESALAAITSRVMAPIVLVVSQKPTAPSKTLFLEALALYDEVTATVLNPKK  
KYIIFEGDVISILGRLDAAVLLGMQRPQPNRMRAVIAAAIRLAI AIR-----

LEEGLINFSRAVDLAVGVYPTLEATVPAVVP-  
DAMAFRVRAHAVSTKKSRPYKEHTKFLHKAELEKSIAAGVDTLA
