# Supplementary material for: Genomics of Yoonia sp. Isolates (Family Roseobacteraceae) from Lake Zhangnai on the Tibetan Plateau
Source: MDPI journal article supplement (doi:10.3390/microorganisms11112817), 2023-11-20
Supplement: s1 [file s1]

**Supplemental Table S1.** Metabolic alterations leading to the last common ancestor (LCA) of strains Y. sp. 72 and Y. sp. 76 (NODE41) and the LCA of strains Y. sp. 67 and Y. sp. 67-2 (NODE45).

| KO     | Abbreviation         | Gene function                                                                       | node41 | node45 |
|--------|----------------------|-------------------------------------------------------------------------------------|--------|--------|
| K00004 | BDH, butB            | (R,R)-butanediol dehydrogenase / meso-butanediol dehydrogenase / diacetyl reductase | gain   |        |
| K00010 | iolG                 | myo-inositol 2-dehydrogenase / D-chiro-inositol 1-dehydrogenase                     |        | loss   |
| K00064 | E1.1.1.122           | D-threo-aldose 1-dehydrogenase                                                      |        | gain   |
| K00066 | algD                 | GDP-mannose 6-dehydrogenase                                                         |        | gain   |
| K00117 | gcd                  | quinoprotein glucose dehydrogenase                                                  |        | gain   |
| K00141 | xylC                 | benzaldehyde dehydrogenase (NAD)                                                    | gain   |        |
| K00259 | ald                  | alanine dehydrogenase                                                               |        | loss   |
| K00262 | E1.4.1.4, gdhA       | glutamate dehydrogenase (NADP+)                                                     |        | gain   |
| K00375 | K00375               | GntR family transcriptional regulator / MocR family aminotransferase                |        | loss   |
| K00389 | yidH                 | putative membrane protein                                                           | gain   |        |
| K00446 | dmpB, xylE           | catechol 2,3-dioxygenase                                                            | gain   |        |
| K00451 | HGD, hmgA            | homogentisate 1,2-dioxygenase                                                       |        | loss   |
| K00625 | E2.3.1.8, pta        | phosphate acetyltransferase                                                         |        | loss   |
| K00697 | otsA                 | trehalose 6-phosphate synthase                                                      | gain   |        |
| K00705 | malQ                 | 4-alpha-glucanotransferase                                                          | gain   |        |
| K00836 | ectB, dat            | diaminobutyrate-2-oxoglutarate transaminase                                         |        | gain   |
| K01087 | otsB                 | trehalose 6-phosphate phosphatase                                                   | gain   |        |
| K01153 | hsdR                 | type I restriction enzyme, R subunit                                                | loss   |        |
| K01154 | hsdS                 | type I restriction enzyme, S subunit                                                | loss   |        |
| K01156 | res                  | type III restriction enzyme                                                         | gain   |        |
| K01166 | RNASET2              | ribonuclease T2                                                                     |        | loss   |
| K01179 | E3.2.1.4             | endoglucanase                                                                       | gain   | gain   |
| K01185 | E3.2.1.17            | lysozyme                                                                            | gain   |        |
| K01193 | INV, sacA            | beta-fructofuranosidase                                                             |        | gain   |
| K01236 | treZ, glgZ           | maltooligosyltrehalose trehalohydrolase                                             | gain   |        |
| K01342 | aprE                 | subtilisin                                                                          | gain   |        |
| K01426 | E3.5.1.4, amiE       | amidase                                                                             | loss   |        |
| K01438 | argE                 | acetylornithine deacetylase                                                         |        | loss   |
| K01473 | hyuA                 | N-methylhydantoinase A                                                              |        | loss   |
| K01474 | hyuB                 | N-methylhydantoinase B                                                              |        | loss   |
| K01559 | oiaT                 | 3-oxoisoapionate-4-phosphate transcarboxylase/hydrolase                             |        | gain   |
| K01596 | E4.1.1.32, pckA, PCK | phosphoenolpyruvate carboxykinase (GTP)                                             | gain   |        |
| K01624 | FBA, fbaA            | fructose-bisphosphate aldolase, class II                                            |        | loss   |
| K01729 | algL                 | poly(beta-D-mannuronate) lyase                                                      |        | gain   |
| K01744 | aspA                 | aspartate ammonia-lyase                                                             |        | gain   |
| K01813 | rhaA                 | L-rhamnose isomerase                                                                | gain   |        |
| K01854 | glf                  | UDP-galactopyranose mutase                                                          |        | gain   |
| K01945 | purD                 | phosphoribosylamine---glycine ligase                                                |        | loss   |
| K01971 | ligD                 | bifunctional non-homologous end joining protein                                     | gain   |        |
| K02013 | ABC.FEV.A            | iron complex transport system ATP-binding protein                                   | loss   |        |
| K02014 | TC.FEV.OM            | iron complex outermembrane receptor protein                                         |        | gain   |
| K02015 | ABC.FEV.P            | iron complex transport system permease protein                                      | loss   |        |
| K02016 | ABC.FEV.S            | iron complex transport system substrate-binding protein                             | loss   |        |

|        |                                    |                                                                                          |      |      |
|--------|------------------------------------|------------------------------------------------------------------------------------------|------|------|
| K02045 | cysA                               | sulfate/thiosulfate transport system ATP-binding protein                                 |      | gain |
| K02046 | cysU                               | sulfate/thiosulfate transport system permease                                            |      | gain |
| K02047 | cysW                               | sulfate/thiosulfate transport system permease                                            |      | gain |
| K02048 | cysP                               | sulfate/thiosulfate transport system substrate-binding protein                           |      | gain |
| K02431 | fucU, FUOM                         | L-fucose mutarotase                                                                      | gain |      |
| K02453 | gspD                               | general secretion pathway protein D                                                      | gain |      |
| K02454 | gspE                               | general secretion pathway protein E                                                      | gain |      |
| K02455 | gspF                               | general secretion pathway protein F                                                      | gain |      |
| K02456 | gspG                               | general secretion pathway protein G                                                      | gain |      |
| K02458 | gspI                               | general secretion pathway protein I                                                      | gain |      |
| K02480 | K02480                             | two-component system, NarL family, sensor kinase                                         |      | loss |
| K02510 | hpaI, hpcH                         | 4-hydroxy-2-oxoheptanedioate aldolase                                                    |      | loss |
| K02564 | nagB, GNPDA                        | glucosamine-6-phosphate deaminase                                                        |      | gain |
| K02586 | nifD                               | nitrogenase molybdenum-iron protein alpha chain                                          |      | gain |
| K02606 | ORC4                               | origin recognition complex subunit 4                                                     |      | gain |
| K02623 | pcaQ                               | LysR family transcriptional regulator, pca operon transcriptional activator              | gain |      |
| K02624 | pcaR                               | IclR family transcriptional regulator, pca regulon regulatory protein                    |      | gain |
| K02651 | flp, pilA                          | pilus assembly protein Flp/PilA                                                          |      | gain |
| K02654 | pilD, pppA                         | leader peptidase (prepilin peptidase) / N-methyltransferase                              | gain |      |
| K02851 | wecA, tagO, rfe                    | UDP-GlcNAc:undecaprenyl-phosphate/decaprenyl-phosphate GlcNAc-1-phosphate transferase    |      | gain |
| K03149 | thiG                               | thiazole synthase                                                                        |      | gain |
| K03154 | thiS                               | sulfur carrier protein                                                                   |      | gain |
| K03284 | corA                               | magnesium transporter                                                                    |      | gain |
| K03307 | TC.SSS                             | solute:Na <sup>+</sup> symporter, SSS family                                             | gain |      |
| K03324 | yjbB                               | phosphate:Na <sup>+</sup> symporter                                                      | gain |      |
| K03335 | iolE                               | inosose dehydratase                                                                      |      | loss |
| K03336 | iolD                               | 3D-(3,5/4)-trihydroxycyclohexane-1,2-dione acylhydrolase (decyclizing)                   |      | loss |
| K03337 | iolB                               | 5-deoxy-glucuronate isomerase                                                            |      | loss |
| K03338 | iolC                               | 5-dehydro-2-deoxygluconokinase                                                           |      | loss |
| K03386 | PRDX2_4, ahpC                      | peroxiredoxin 2/4                                                                        | gain |      |
| K03427 | hsdM                               | type I restriction enzyme M protein                                                      | loss |      |
| K03566 | gcvA                               | LysR family transcriptional regulator, glycine cleavage system transcriptional activator | loss |      |
| K03585 | acrA, mexA, adeI, smeD, mtrC, cmeA | membrane fusion protein, multidrug efflux system                                         |      | gain |
| K03651 | cpdA                               | 3',5'-cyclic-AMP phosphodiesterase                                                       |      | gain |
| K03707 | tenA                               | thiaminase (transcriptional activator TenA)                                              |      | gain |
| K03717 | nhaR                               | LysR family transcriptional regulator, transcriptional activator of nhaA                 |      | loss |
| K03781 | katE, CAT, catB, srpA              | catalase                                                                                 | gain |      |
| K03818 | wcaF                               | putative colanic acid biosynthesis acetyltransferase WcaF                                |      | loss |
| K03885 | ndh                                | NADH:ubiquinone reductase (H <sup>+</sup> -translocating)                                |      | gain |
| K04034 | bchE                               | anaerobic magnesium-protoporphyrin IX monomethyl ester cyclase                           | gain |      |

|        |                          |                                                                    |      |      |
|--------|--------------------------|--------------------------------------------------------------------|------|------|
| K04036 | bchJ                     | divinyl protochlorophyllide a 8-vinyl-reductase                    | gain |      |
| K04045 | hscC                     | molecular chaperone HscC                                           | gain |      |
| K04063 | osmC, ohr                | lipoyl-dependent peroxiredoxin                                     |      | gain |
| K04085 | tusA, sirA               | tRNA 2-thiouridine synthesizing protein A                          |      | loss |
| K04095 | fic                      | cell filamentation protein                                         |      | gain |
| K04101 | ligB                     | protocatechuate 4,5-dioxygenase, beta chain                        | gain |      |
| K04343 | strB                     | streptomycin 6-kinase                                              |      | gain |
| K04565 | SOD1                     | superoxide dismutase, Cu-Zn family                                 | gain |      |
| K04749 | rsbV                     | anti-sigma B factor antagonist                                     |      | gain |
| K04757 | rsbW                     | serine/threonine-protein kinase RsbW                               |      | gain |
| K05343 | treS                     | maltose alpha-D-glucosyltransferase / alpha-                       | gain |      |
| K05523 | hchA                     | D-lactate dehydratase / protein deglycase                          |      | gain |
| K05785 | rfaH                     | transcriptional antiterminator RfaH                                |      | gain |
| K05786 | rarD                     | chloramphenicol-sensitive protein RarD                             |      | loss |
| K05835 | rhtC                     | threonine efflux protein                                           | gain |      |
| K05979 | comB                     | 2-phosphosulfolactate phosphatase                                  |      | gain |
| K06044 | treY, glgY               | (1->4)-alpha-D-glucan 1-alpha-D-glucosylmutase                     | gain |      |
| K06118 | SQD1, sqdB               | UDP-sulfoquinovose synthase                                        |      | gain |
| K06183 | rsuA                     | 16S rRNA pseudouridine516 synthase                                 |      | gain |
| K06193 | phnA                     | protein PhnA                                                       |      | gain |
| K06203 | cysZ                     | CysZ protein                                                       |      | loss |
| K06223 | dam                      | DNA adenine methylase                                              | gain |      |
| K06602 | flaF                     | flagellar biosynthesis activator protein FlaF                      | gain |      |
| K06718 | ectA                     | L-2,4-diaminobutyric acid acetyltransferase                        |      | gain |
| K06720 | ectC                     | L-ectoine synthase                                                 |      | gain |
| K06864 | larE                     | pyridinium-3,5-biscarboxylic acid mononucleotide sulfurtransferase |      | gain |
| K06877 | K06877                   | DEAD/DEAH box helicase domain-containing                           | gain |      |
| K06898 | larB                     | pyridinium-3,5-biscarboxylic acid mononucleotide synthase          |      | gain |
| K06919 | K06919                   | putative DNA primase/helicase                                      | gain |      |
| K06959 | tex                      | protein Tex                                                        |      | gain |
| K07046 | K07046                   | L-fuconolactonase                                                  |      | gain |
| K07062 | fitB                     | toxin FitB                                                         |      | gain |
| K07089 | K07089                   | uncharacterized protein                                            | gain |      |
| K07217 | K07217                   | Mn-containing catalase                                             | gain |      |
| K07226 | hutZ, hugZ               | heme oxygenase (biliverdin-IX-beta and delta-forming)              |      | loss |
| K07238 | TC.ZIP, zupT, ZRT3, ZIP2 | zinc transporter, ZIP family                                       |      | gain |
| K07246 | ttuC, dmlA               | tartrate dehydrogenase/decarboxylase / D-malate dehydrogenase      |      | gain |
| K07248 | aldA                     | lactaldehyde dehydrogenase / glycolaldehyde dehydrogenase          | gain |      |
| K07273 | acm                      | lysozyme                                                           |      | gain |
| K07283 | ydiY                     | putative salt-induced outer membrane protein                       |      | loss |
| K07315 | rsbU_P                   | phosphoserine phosphatase RsbU/P                                   |      | gain |
| K07316 | mod                      | adenine-specific DNA-methyltransferase                             | gain |      |
| K07317 | K07317                   | adenine-specific DNA-methyltransferase                             |      | gain |
| K07340 | ybbJ                     | inner membrane protein                                             |      | loss |
| K07389 | cyaC, hlyC, rtxC         | cytolysin-activating lysine-acyltransferase                        |      | gain |
| K07448 | mrr                      | restriction system protein                                         | gain |      |
| K07451 | mcrA                     | 5-methylcytosine-specific restriction enzyme A                     | gain |      |
| K07496 | K07496                   | putative transposase                                               |      | gain |

|        |                 |                                                                                       |      |      |
|--------|-----------------|---------------------------------------------------------------------------------------|------|------|
| K07516 | fadN            | 3-hydroxyacyl-CoA dehydrogenase                                                       |      | gain |
| K07684 | narL            | two-component system, NarL family, nitrate/nitrite response regulator NarL            |      | loss |
| K07734 | paiB            | transcriptional regulator                                                             |      | gain |
| K08281 | pncA            | nicotinamidase/pyrazinamidase                                                         |      | loss |
| K08355 | aoxA            | arsenite oxidase small subunit                                                        |      | gain |
| K08356 | aoxB            | arsenite oxidase large subunit                                                        |      | gain |
| K08678 | UXS1, uxs       | UDP-glucuronate decarboxylase                                                         | gain |      |
| K08809 | SPEG            | striated muscle-specific serine/threonine protein                                     |      | gain |
| K09001 | anmK            | anhydro-N-acetylmuramic acid kinase                                                   |      | loss |
| K09121 | larC            | pyridinium-3,5-bisthiocarboxylic acid mononucleotide nickel chelata                   |      | gain |
| K09123 | lhpI            | cis-L-3-hydroxyproline dehydratase                                                    |      | gain |
| K09779 | K09779          | uncharacterized protein                                                               | gain |      |
| K09794 | K09794          | uncharacterized protein                                                               |      | loss |
| K09803 | K09803          | uncharacterized protein                                                               |      | gain |
| K09922 | K09922          | uncharacterized protein                                                               |      | gain |
| K09930 | K09930          | uncharacterized protein                                                               |      | loss |
| K09955 | K09955          | uncharacterized protein                                                               |      | gain |
| K10192 | togB            | oligogalacturonide transport system substrate-binding protein                         | gain |      |
| K10193 | togM            | oligogalacturonide transport system permease                                          | gain |      |
| K10194 | togN            | oligogalacturonide transport system permease                                          | gain |      |
| K10195 | togA            | oligogalacturonide transport system ATP-binding protein                               | gain |      |
| K10218 | ligK, galC      | 4-hydroxy-4-methyl-2-oxoglutarate aldolase                                            | gain |      |
| K10227 | smoE, mtlE      | polyol transport system substrate-binding protein                                     |      | loss |
| K10228 | smoF, mtlF      | polyol transport system permease protein                                              |      | loss |
| K10229 | smoG, mtlG      | polyol transport system permease protein                                              |      | loss |
| K10546 | ABC.GGU.S, chvE | putative multiple sugar transport system substrate-binding protein                    |      | gain |
| K10547 | ABC.GGU.P, gguB | putative multiple sugar transport system permease protein                             |      | gain |
| K10548 | ABC.GGU.A, gguA | putative multiple sugar transport system ATP-binding protein                          |      | gain |
| K10552 | frcB            | fructose transport system substrate-binding protein                                   |      | loss |
| K10553 | frcC            | fructose transport system permease protein                                            |      | loss |
| K10554 | frcA            | fructose transport system ATP-binding protein                                         |      | loss |
| K10806 | yciA            | acyl-CoA thioesterase YciA                                                            |      | gain |
| K10820 | ytfR            | galactofuranose transport system ATP-binding                                          | gain |      |
| K10979 | ku              | DNA end-binding protein Ku                                                            | gain |      |
| K11003 | hlyD, cyaD      | membrane fusion protein, hemolysin D                                                  |      | gain |
| K11004 | hlyB, cyaB      | ATP-binding cassette, subfamily B, bacterial HlyB/CyaB                                |      | gain |
| K11177 | yagR            | xanthine dehydrogenase YagR molybdenum-binding subunit                                |      | gain |
| K11178 | yagS            | xanthine dehydrogenase YagS FAD-binding                                               |      | gain |
| K11447 | UTX, KDM6A      | lysine-specific demethylase 6A                                                        | gain |      |
| K11475 | vanR            | GntR family transcriptional regulator, vanillate catabolism transcriptional regulator | gain |      |
| K11690 | dctM            | C4-dicarboxylate transporter, DctM subunit                                            | loss |      |
| K11860 | OTUD7A_B        | OTU domain-containing protein 7                                                       |      | gain |
| K12257 | secDF           | SecD/SecF fusion protein                                                              | gain | gain |
| K12658 | lhpA            | 4-hydroxyproline epimerase                                                            |      | gain |
| K12856 | PRPF8, PRP8     | pre-mRNA-processing factor 8                                                          | gain |      |

|        |            |                                                                                               |      |      |
|--------|------------|-----------------------------------------------------------------------------------------------|------|------|
| K12960 | mtaD       | 5-methylthioadenosine/S-adenosylhomocysteine deaminase                                        |      | gain |
| K13015 | wbpA       | UDP-N-acetyl-D-glucosamine dehydrogenase                                                      |      | gain |
| K13016 | wbpB       | UDP-N-acetyl-2-amino-2-deoxyglucuronate dehydrogenase                                         |      | gain |
| K13017 | wbpE, wlbC | UDP-2-acetamido-2-deoxy-ribo-hexuluronate aminotransferase                                    |      | gain |
| K13018 | wbpD, wlbB | UDP-2-acetamido-3-amino-2,3-dideoxy-glucuronate N-acetyltransferase                           |      | gain |
| K13019 | wbpI, wlbD | UDP-GlcNAc3NAcA epimerase                                                                     |      | gain |
| K13210 | FUBP       | far upstream element-binding protein                                                          |      | gain |
| K13483 | yagT       | xanthine dehydrogenase YagT iron-sulfur-binding subunit                                       |      | gain |
| K13609 | dpkA, lhpD | delta1-piperideine-2-carboxylate reductase                                                    |      | gain |
| K13622 | btaA       | S-adenosylmethionine-diacylglycerol 3-amino-3-carboxypropyl transferase                       |      | gain |
| K13623 | btaB       | S-adenosylmethionine-diacylglycerolhomoserine-N-methyltransferase                             |      | gain |
| K13641 | iclR       | IclR family transcriptional regulator, acetate operon repressor                               |      | loss |
| K13688 | chvB, cgs, | cyclic beta-1,2-glucan synthetase                                                             |      | gain |
| K13876 | araD       | 2-keto-3-deoxy-L-arabinonate dehydratase                                                      |      | gain |
| K13877 | aldH       | 2,5-dioxopentanoate dehydrogenase                                                             |      | gain |
| K13924 | cheBR      | two-component system, chemotaxis family, CheB/CheR fusion protein                             | gain |      |
| K13979 | yahK       | alcohol dehydrogenase (NADP+)                                                                 | gain |      |
| K15066 | ligM       | vanillate/3-O-methylgallate O-demethylase                                                     | gain |      |
| K15228 | mauA       | methylamine dehydrogenase light chain                                                         |      | gain |
| K15229 | mauB       | methylamine dehydrogenase heavy chain                                                         |      | gain |
| K15532 | yteR, yesR | unsaturated rhamnogalacturonyl hydrolase                                                      | gain |      |
| K15598 | thiY       | putative hydroxymethylpyrimidine transport system substrate-binding protein                   |      | gain |
| K15599 | thiX       | putative hydroxymethylpyrimidine transport system permease protein                            |      | gain |
| K15600 | thiZ       | putative hydroxymethylpyrimidine transport system ATP-binding protein                         |      | gain |
| K15629 | CYP152A    | fatty-acid peroxygenase                                                                       | gain |      |
| K16147 | glgE       | starch synthase (maltosyl-transferring)                                                       | gain |      |
| K16264 | czcD, zitB | cobalt-zinc-cadmium efflux system protein                                                     |      | gain |
| K16302 | CNNM       | metal transporter CNNM                                                                        |      | gain |
| K16514 | galD       | 4-oxalomesaconate tautomerase                                                                 | gain |      |
| K16515 | galB       | 4-oxalomesaconate hydratase                                                                   | gain |      |
| K16516 | galR       | LysR family transcriptional regulator, regulator for genes of the gallate degradation pathway | gain |      |
| K16692 | etk-wzc    | tyrosine-protein kinase Etk/Wzc                                                               |      | gain |
| K16841 | hpxA       | allantoin racemase                                                                            |      | loss |
| K17218 | sqr        | sulfide:quinone oxidoreductase                                                                |      | loss |
| K17226 | soxY       | sulfur-oxidizing protein SoxY                                                                 |      | loss |
| K17229 | fccB       | sulfide dehydrogenase [flavocytochrome c] flavoprotein chain                                  |      | loss |
| K17401 | MRPS22     | small subunit ribosomal protein S22                                                           |      | gain |
| K17588 | PREX2      | phosphatidylinositol 3,4,5-trisphosphate-dependent Rac exchanger 2 protein                    |      | gain |
| K17836 | penP       | beta-lactamase class A                                                                        |      | gain |

|        |                                    |                                                                                         |      |      |
|--------|------------------------------------|-----------------------------------------------------------------------------------------|------|------|
| K17850 | ampR                               | LysR family transcriptional regulator, regulator of gene expression of beta-lactamase   |      | gain |
| K18009 | budC                               | meso-butanediol dehydrogenase / (S,S)-butanediol dehydrogenase / diacetyl reductase     |      | gain |
| K18138 | acrB, mexB, adeJ, smeE, mtrD, cmeB | multidrug efflux pump                                                                   |      | gain |
| K18143 | adeS                               | two-component system, OmpR family, sensor histidine kinase AdeS                         | gain | gain |
| K18144 | adeR                               | two-component system, OmpR family, response regulator AdeR                              | gain | gain |
| K18335 | K18335                             | 2-keto-3-deoxy-L-fuconate dehydrogenase                                                 | gain |      |
| K18802 | DUG3                               | glutamine amidotransferase                                                              |      | gain |
| K18910 | dpe, lre                           | D-psicose/D-tagatose/L-ribulose 3-epimerase                                             |      | gain |
| K19163 | ccdB                               | toxin CcdB                                                                              |      | gain |
| K19165 | phd                                | antitoxin Phd                                                                           |      | gain |
| K19271 | catA                               | chloramphenicol O-acetyltransferase type A                                              |      | loss |
| K19290 | alg8                               | mannuronan synthase                                                                     |      | gain |
| K19293 | algX                               | alginate biosynthesis protein AlgX                                                      |      | gain |
| K19294 | algI                               | alginate O-acetyltransferase complex protein AlgI                                       |      | gain |
| K19295 | algJ                               | alginate O-acetyltransferase complex protein AlgJ                                       |      | gain |
| K20074 | prpC, phpP                         | PPM family protein phosphatase                                                          |      | loss |
| K21001 | pslH                               | polysaccharide biosynthesis protein PslH                                                | gain |      |
| K21060 | lhpB                               | D-hydroxyproline dehydrogenase                                                          |      | gain |
| K21062 | lhpC                               | 1-pyrroline-4-hydroxy-2-carboxylate deaminase                                           |      | gain |
| K21147 | moeZR, moeBR                       | sulfur-carrier protein<br>adenylyltransferase/sulfurtransferase                         |      | gain |
| K21310 | mddA                               | methanethiol S-methyltransferase                                                        |      | loss |
| K21394 | yiaM                               | TRAP-type transport system small permease                                               |      | gain |
| K21802 | vdh                                | vanillin dehydrogenase                                                                  | gain |      |
| K22441 | paiA                               | diamine N-acetyltransferase                                                             |      | gain |
| K22479 | argA                               | N-acetyltransferase                                                                     |      | gain |
| K22548 | lhpL                               | trans-L-3-hydroxyproline dehydratase                                                    |      | gain |
| K22602 | hpxW                               | oxamate amidohydrolase                                                                  |      | gain |
| K23054 | desC                               | sn-1 stearyl-lipid 9-desaturase                                                         | gain |      |
| K23061 | lhpP                               | hydroxyproline transporter system substrate-binding protein                             |      | gain |
| K23062 | lhpM                               | hydroxyproline transport system permease protein                                        |      | gain |
| K23063 | lhpN                               | hydroxyproline transport system permease protein                                        |      | gain |
| K23064 | lhpO                               | hydroxyproline transport system ATP-binding                                             |      | gain |
| K23186 | fepD, fagA, cchC, desH             | iron-siderophore transport system permease protein                                      |      | gain |
| K23187 | fepG, fagB, cchD, desG             | iron-siderophore transport system permease protein                                      |      | gain |
| K23188 | fepC, fagC, cchE, desF             | iron-siderophore transport system ATP-binding protein                                   |      | gain |
| K23219 | MBD5                               | methyl-CpG-binding domain protein 5                                                     |      | gain |
| K23238 | rpiR, alsR                         | RpiR family transcriptional regulator, repressor of rpiB and als operon                 |      | gain |
| K23359 | biuH                               | biuret amidohydrolase                                                                   | gain |      |
| K23508 | ytfQ                               | galactofuranose transport system substrate-binding protein                              | gain |      |
| K23509 | ytfT, yjfF                         | galactofuranose transport system permease protein                                       | gain |      |
| K23533 | LINGO, LRRN6                       | leucine-rich repeat and immunoglobulin-like domain-containing nogo receptor-interacting | gain |      |

|        |                            |                                                                |  |      |
|--------|----------------------------|----------------------------------------------------------------|--|------|
| K25286 | fagD, cchF,<br>irp1A, piaA | iron-siderophore transport system substrate-binding<br>protein |  | gain |
| K25307 | wzb, etp                   | low molecular weight protein-tyrosine phosphatase              |  | gain |
| K26858 |                            |                                                                |  | gain |
